# Supplementary material for: Effects of physical exercise and body weight on disease-specific outcomes of people with rheumatic and musculoskeletal diseases (RMDs): systematic reviews and meta-analyses informing the 2021 EULAR recommendations for lifestyle improvements in people with RMDs
Source: PubMed Central journal article supplement (PMC8971792; doi:10.1136/rmdopen-2021-002168), 2022-03-30
Supplement: rmdopen-2021-002168supp001.pdf [file rmdopen-2021-002168supp001.pdf]

Supplementary tables – exercise and weight review

### Supplementary table 1 – Search strategy for systematic review of published reviews and meta-analyses

| Category | Term                                                                                                                                                                                                                                                                                                                                                                                                                                                                                                                                                                                                                                                                                                                                                                                                                                                                                                                                                                                                                                                                                                                                                                                                                                                                                                                                                                                                                                                                                                                                                                                                                                                                                                                                                                                                                                                                                                                                                                                                                                               |
|----------|----------------------------------------------------------------------------------------------------------------------------------------------------------------------------------------------------------------------------------------------------------------------------------------------------------------------------------------------------------------------------------------------------------------------------------------------------------------------------------------------------------------------------------------------------------------------------------------------------------------------------------------------------------------------------------------------------------------------------------------------------------------------------------------------------------------------------------------------------------------------------------------------------------------------------------------------------------------------------------------------------------------------------------------------------------------------------------------------------------------------------------------------------------------------------------------------------------------------------------------------------------------------------------------------------------------------------------------------------------------------------------------------------------------------------------------------------------------------------------------------------------------------------------------------------------------------------------------------------------------------------------------------------------------------------------------------------------------------------------------------------------------------------------------------------------------------------------------------------------------------------------------------------------------------------------------------------------------------------------------------------------------------------------------------------|
| Diseases | <ol style="list-style-type: none"> <li>1. Arthritis, Rheumatoid (mesh) (exp) (include all subheadings)</li> <li>2. Inflammatory \$arthritis</li> <li>3. Undifferentiated arthritis</li> <li>4. RA</li> <li>5. Atrophic arthritis</li> <li>6. Proliferative arthritis</li> <li>7. Osteoarth\$</li> <li>8. Arthrosis</li> <li>9. Degenerative joint disease</li> <li>10. Hypertrophic arthritis</li> <li>11. Arthropathy</li> <li>12. Polyarthritis</li> <li>13. OA</li> <li>14. Arthritis psoriatica</li> <li>15. Arthropathic psoriasis</li> <li>16. Psoriatic arthropathy</li> <li>17. Arthritis, Psoriatic (mesh) (exp) (include all subheadings)</li> <li>18. Psoria\$ arthriti\$ [have to uncheck “map team to subject heading”]</li> <li>19. Psoria\$ arthropath\$ [have to uncheck “map team to subject heading”]</li> <li>20. Undifferentiated oligoarthritis</li> <li>21. Arthritic psoriasis</li> <li>22. PsA</li> <li>23. Ankylosing spondylitis (mesh) (exp) (include all subheadings)</li> <li>24. Ankylosi\$</li> <li>25. Spondyloarthr\$ [have to uncheck “map team to subject heading”]</li> <li>26. Spondylarthr\$ [have to uncheck “map team to subject heading”]</li> <li>27. Spondylitis (mesh) (exp) (include all subheadings)</li> <li>28. Bechtere\$ [have to uncheck “map team to subject heading”]</li> <li>29. Marie-Strumpell</li> <li>30. Spinal arthritis</li> <li>31. Lupus erythematosus, systemic (mesh) (exp) (include all subheadings)</li> <li>32. systemic lupus erythematosus</li> <li>33. SLE</li> <li>34. Libman-Sacks disease</li> <li>35. Libman Sacks disease</li> <li>36. Lupus erythematosus disseminatus</li> <li>37. Disseminated lupus erythematosus</li> <li>38. Lupus syndrome</li> <li>39. Scleroderma, Systemic (mesh) (exp) (include all subheadings)</li> <li>40. SSc</li> <li><del>41. Scleros\$ (removed because of ALS, multiple sclerosis etc.)</del></li> <li>42. Thibierge-Weissenbach syndrome</li> <li>43. Morphea</li> <li>44. Gout (mesh) (exp) (include all subheadings)</li> </ol> |

|                      |                                                                                                                                                                                                                                                                                                                                                                                                                                                                                                                                                                                                                                                                                                                                                                                                                                                                                                                                                                                                                                                                                                                                                                                                                                                                                                                                                                                                                                                                                             |
|----------------------|---------------------------------------------------------------------------------------------------------------------------------------------------------------------------------------------------------------------------------------------------------------------------------------------------------------------------------------------------------------------------------------------------------------------------------------------------------------------------------------------------------------------------------------------------------------------------------------------------------------------------------------------------------------------------------------------------------------------------------------------------------------------------------------------------------------------------------------------------------------------------------------------------------------------------------------------------------------------------------------------------------------------------------------------------------------------------------------------------------------------------------------------------------------------------------------------------------------------------------------------------------------------------------------------------------------------------------------------------------------------------------------------------------------------------------------------------------------------------------------------|
|                      | <p>45. Gout\$<br/> 46. Podagra<br/> 47. Tophus<br/> 48. Tophi<br/> 49. Tophaceous<br/> 50. Urate<br/> 51. Uric acid<br/> 52. Hyperurecemi\$ [have to uncheck "map team to subject heading"]<br/> 53. Hyperurecaemi\$ [have to uncheck "map team to subject heading"]<br/> 54. Hyperuricemia\$<br/> 55. Hyperuricaemi\$ [have to uncheck "map team to subject heading"]<br/> 56. arthritis urica<br/> 57. Gout acute</p>                                                                                                                                                                                                                                                                                                                                                                                                                                                                                                                                                                                                                                                                                                                                                                                                                                                                                                                                                                                                                                                                     |
| Life-style exposures | <p>58. Diet (mesh) (exp) (include all subheadings)<br/> 59. Nutrition<br/> 60. Food (mesh) (exp) (include all subheadings)<br/> 61. Food habit\$<br/> 62. Nutritional status (mesh) (exp) (include all subheadings)<br/> 63. Vitamin\$ (mesh) (exp) (include all subheadings)<br/> 64. Antioxidant\$ (mesh) (exp) (include all subheadings)<br/> 65. Fatty acid\$ (mesh) (exp) (include all subheadings)<br/> 66. Carbohydrate\$ (mesh) (exp) (include all subheadings)<br/> 67. Diet\$ protein<br/> 68. Calcium<br/> 69. Fish oil\$ (mesh) (exp) (include all subheadings)<br/> 70. Fruit (mesh) (exp) (include all subheadings)<br/> 71. Vegetable\$ (mesh) (exp) (include all subheadings)<br/> 72. Micronutrient\$ (mesh) (exp) (include all subheadings)<br/> 73. Nutriment\$<br/> 74. Nutraceutical\$<br/> 75. Exercis\$<br/> 76. Strength\$<br/> 77. Endurance<br/> 78. Cardiorespiratory<br/> 79. Aerobic<br/> 80. Aerobic training<br/> 81. Exercise program\$<br/> 82. Exercise therap\$ [have to uncheck "map team to subject heading"]<br/> 83. Physical education<br/> 84. Physical training<br/> 85. Physical therapy<br/> 86. Physiotherapy<br/> 87. Muscle stretching<br/> 88. Sport (mesh) (exp) (include all subheadings)<br/> 89. Bod\$y Weight (mesh) (exp) (include all subheadings)<br/> 90. Weight change<br/> 91. Weight loss (mesh) (exp) (include all subheadings)<br/> 92. Weight reduction<br/> 93. Weight gain<br/> 94. Anti obesity<br/> 95. Anti-obesity</p> |

|                         |                                                                                                                                                                                                                                                                                                                                                                                                                                                                                                                                                                                                                                                                                                                                                                                                                                                                                                                                    |
|-------------------------|------------------------------------------------------------------------------------------------------------------------------------------------------------------------------------------------------------------------------------------------------------------------------------------------------------------------------------------------------------------------------------------------------------------------------------------------------------------------------------------------------------------------------------------------------------------------------------------------------------------------------------------------------------------------------------------------------------------------------------------------------------------------------------------------------------------------------------------------------------------------------------------------------------------------------------|
|                         | <p>96. Antiobesity<br/> 97. Slimming<br/> 98. Smok\$<br/> 99. Smoking (mesh) (exp) (include all subheadings)<br/> 100. Tobacco (mesh) (exp) (include all subheadings)<br/> 101. Cigarette\$<br/> 102. Pipe\$<br/> 103. Cigar\$<br/> 104. Nicotine (mesh) (exp) (include all subheadings)<br/> 105. Water pipe<br/> 106. Hookah<br/> 107. Shisha<br/> 108. Paid work<br/> 109. Employment (mesh) (exp) (include all subheadings)<br/> 110. Work\$ disability<br/> 111. Productivity<br/> 112. Employability<br/> 113. Work\$ ability<br/> 114. Absenteeism (mesh) (exp) (include all subheadings)<br/> 115. Sick leave (mesh) (exp) (include all subheadings)<br/> 116. Presenteeism (mesh) (exp) (include all subheadings)<br/> 117. Sick\$ absence<br/> 118. Work instability<br/> 119. Return to work (mesh) (exp) (include all subheadings)<br/> 120. Economic consequences<br/> 121. Occupational health<br/> 122. Labo\$r</p> |
| Systematic review terms | <p>123. Systematic adj5 review<br/> 124. Narrative review<br/> 125. Meta-analysis (mesh) (exp)<br/> 126. Meta analysis<br/> 127. Meta adj5 analysis<br/> 128. Meta-synthesis<br/> 129. Meta synthesis<br/> 130. Meta adj5 synthesis<br/> 131. Literature review<br/> 132. Literature search<br/> 133. Meta-narrative review<br/> 134. Meta narrative review</p>                                                                                                                                                                                                                                                                                                                                                                                                                                                                                                                                                                    |
| Combining terms         | <p>135. RA – 1 OR 2 OR 3 OR 4 OR 5 OR 6<br/> 136. OA – 7 OR 8 OR 9 OR 10 OR 11 OR 12 OR 13<br/> 137. PSA – 14 OR 15 OR 16 OR 17 OR 18 OR 19 OR 20 OR 21 OR 22<br/> 138. AS – 23 OR 24 OR 25 OR 26 OR 27 OR 28 OR 29 OR 30<br/> 139. SLE – 31 OR 32 OR 33 OR 34 OR 35 OR 36 OR 37 OR 38<br/> 140. SSc – 39 OR 40 OR 41 OR 42 OR 43<br/> 141. Gout – 44 OR 45 OR 46 OR 47 OR 48 OR 49 OR 50 OR 51 OR 52 OR 53 OR 54 OR 55 OR 56 OR 57<br/> 142. Diseases – 136 OR 137 OR 138 OR 139 OR 140 OR 141 OR 142<br/> 143. Diet – 58 OR 59 OR 60 OR 61 OR 62 OR 63 OR 64 OR 65 OR 66 OR 67 OR 68 OR 69 OR 70 OR 71 OR 72 OR 73 OR 74</p>                                                                                                                                                                                                                                                                                                     |

|  |                                                                                                                                                                                                                                                                                                                                                                                                                                                                                                                                                                                                                       |
|--|-----------------------------------------------------------------------------------------------------------------------------------------------------------------------------------------------------------------------------------------------------------------------------------------------------------------------------------------------------------------------------------------------------------------------------------------------------------------------------------------------------------------------------------------------------------------------------------------------------------------------|
|  | <p>144. Exercise – 75 OR 76 OR 77 OR 78 OR 79 OR 80 OR 81 OR 82 OR 83 OR 84 OR 85 OR 86 OR 87 OR 88</p> <p>145. Weight – 89 OR 90 OR 91 OR 92 OR 93 OR 94 OR 95 OR 96 OR 97</p> <p>146. Smoking - 98 OR 99 OR 100 OR 101 OR 102 OR 103 OR 104 OR 105 OR 106 OR 107</p> <p>147. Work – 108 OR 109 OR 110 OR 111 OR 112 OR 113 OR 114 OR 115 OR 116 OR 117 OR 118 OR 119 OR 120 OR 121 OR 122</p> <p>148. Exposures – 144 OR 145 OR 146 OR 147 OR 148</p> <p>149. Systematic review terms - 123 OR 124 OR 125 OR 126 OR 127 OR 128 OR 129 OR 130 OR 131 OR 132 OR 133 OR 134 OR 135</p> <p>150. 143 AND 149 AND 150</p> |
|--|-----------------------------------------------------------------------------------------------------------------------------------------------------------------------------------------------------------------------------------------------------------------------------------------------------------------------------------------------------------------------------------------------------------------------------------------------------------------------------------------------------------------------------------------------------------------------------------------------------------------------|

## Supplementary table 2 – Search strategy to identify published systematic reviews and meta-analyses on alcohol

The results from the first review of published systematic reviews and meta-analyses (supplementary table 1) were presented at a teleconference in January 2019. At this teleconference, it was decided to add alcohol as an exposure of interest for this taskforce. This led to a second systematic review of published reviews and meta-analyses. For completeness, the search strategy for this review is below. The results from this review are not reported in this systematic review on exercise and weight; they are published in a separate review on smoking and alcohol. However, these studies are included in the flow chart of figure 1, hence the inclusion of the search strategy here.

| Category | Term                                                                                                                                                                                                                                                                                                                                                                                                                                                                                                                                                                                                                                                                                                                                                                                                                                                                                                                                                                                                                                                                                                                                                                                                                                                                                                                                                                                                                                                                                                                                                                                                                                                                                                                                      |
|----------|-------------------------------------------------------------------------------------------------------------------------------------------------------------------------------------------------------------------------------------------------------------------------------------------------------------------------------------------------------------------------------------------------------------------------------------------------------------------------------------------------------------------------------------------------------------------------------------------------------------------------------------------------------------------------------------------------------------------------------------------------------------------------------------------------------------------------------------------------------------------------------------------------------------------------------------------------------------------------------------------------------------------------------------------------------------------------------------------------------------------------------------------------------------------------------------------------------------------------------------------------------------------------------------------------------------------------------------------------------------------------------------------------------------------------------------------------------------------------------------------------------------------------------------------------------------------------------------------------------------------------------------------------------------------------------------------------------------------------------------------|
| Disease  | <ol style="list-style-type: none"> <li>1. Arthritis, Rheumatoid (mesh) (exp) (include all subheadings)</li> <li>2. Inflammatory \$arthritis</li> <li>3. Undifferentiated arthritis</li> <li>4. RA</li> <li>5. Atrophic arthritis</li> <li>6. Proliferative arthritis</li> <li>7. Osteoarth\$</li> <li>8. Arthrosis</li> <li>9. Degenerative joint disease</li> <li>10. Hypertrophic arthritis</li> <li>11. Arthropathy</li> <li>12. Polyarthritis</li> <li>13. OA</li> <li>14. Arthritis psoriatica</li> <li>15. Arthropathic psoriasis</li> <li>16. Psoriatic arthropathy</li> <li>17. Arthritis, Psoriatic (mesh) (exp) (include all subheadings)</li> <li>18. Psoria\$ arthriti\$ [have to uncheck "map team to subject heading"]</li> <li>19. Psoria\$ arthropath\$ [have to uncheck "map team to subject heading"]</li> <li>20. Undifferentiated oligoarthritis</li> <li>21. Arthritic psoriasis</li> <li>22. PsA</li> <li>23. Ankylosing spondylitis (mesh) (exp) (include all subheadings)</li> <li>24. Ankylosi\$</li> <li>25. Spondyloarthr\$ [have to uncheck "map team to subject heading"]</li> <li>26. Spondylarthr\$ [have to uncheck "map team to subject heading"]</li> <li>27. Spondylitis (mesh) (exp) (include all subheadings)</li> <li>28. Bechtere\$ [have to uncheck "map team to subject heading"]</li> <li>29. Marie-Strumpell</li> <li>30. Spinal arthritis</li> <li>31. Lupus erythematosus, systemic (mesh) (exp) (include all subheadings)</li> <li>32. systemic lupus erythematosus</li> <li>33. SLE</li> <li>34. Libman-Sacks disease</li> <li>35. Libman Sacks disease</li> <li>36. Lupus erythematosus disseminatus</li> <li>37. Disseminated lupus erythematosus</li> <li>38. Lupus syndrome</li> </ol> |

|                                |                                                                                                                                                                                                                                                                                                                                                                                                                                                                                                                                                                                                                                                                                                |
|--------------------------------|------------------------------------------------------------------------------------------------------------------------------------------------------------------------------------------------------------------------------------------------------------------------------------------------------------------------------------------------------------------------------------------------------------------------------------------------------------------------------------------------------------------------------------------------------------------------------------------------------------------------------------------------------------------------------------------------|
|                                | <p>39. Scleroderma, Systemic (mesh) (exp) (include all subheadings)</p> <p>40. SSc</p> <p>41. Thibierge-Weissenbach syndrome</p> <p>42. Morphea</p> <p>43. Gout (mesh) (exp) (include all subheadings)</p> <p>44. Gout\$</p> <p>45. Podagra</p> <p>46. Tophus</p> <p>47. Tophi</p> <p>48. Tophaceous</p> <p>49. Urate</p> <p>50. Uric acid</p> <p>51. Hyperurecemi\$ [have to uncheck “map team to subject heading”]</p> <p>52. Hyperurecaemi\$ [have to uncheck “map team to subject heading”]</p> <p>53. Hyperuricemia\$</p> <p>54. Hyperuricaemi\$ [have to uncheck “map team to subject heading”]</p> <p>55. arthritis urica</p> <p>56. Gout acute</p>                                     |
| <i>Exposure</i>                | <p>57. Alcohol</p> <p>58. Ethanol</p> <p>59. Beer</p> <p>60. Wine</p> <p>61. Spirit\$</p> <p>62. liquor</p>                                                                                                                                                                                                                                                                                                                                                                                                                                                                                                                                                                                    |
| <i>Systematic review terms</i> | <p>63. Systematic adj5 review</p> <p>64. Narrative review</p> <p>65. Meta-analysis (mesh) (exp)</p> <p>66. Meta analysis</p> <p>67. Meta adj5 analysis</p> <p>68. Meta-synthesis</p> <p>69. Meta synthesis</p> <p>70. Meta adj5 synthesis</p> <p>71. Literature review</p> <p>72. Literature search</p> <p>73. Meta-narrative review</p> <p>74. Meta narrative review</p>                                                                                                                                                                                                                                                                                                                      |
| <i>Combining terms</i>         | <p>75. RA – 1 OR 2 OR 3 OR 4 OR 5 OR 6</p> <p>76. OA – 7 OR 8 OR 9 OR 10 OR 11 OR 12 OR 13</p> <p>77. PSA – 14 OR 15 OR 16 OR 17 OR 18 OR 19 OR 20 OR 21 OR 22</p> <p>78. AS – 23 OR 24 OR 25 OR 26 OR 27 OR 28 OR 29 OR 30</p> <p>79. SLE – 31 OR 32 OR 33 OR 34 OR 35 OR 36 OR 37 OR 38</p> <p>80. SSc – 39 OR 40 OR 41 OR 42</p> <p>81. Gout – 43 OR 44 OR 45 OR 46 OR 47 OR 48 OR 49 OR 50 OR 51 OR 52 OR 53 OR 54 OR 55 OR 56</p> <p>82. Alcohol – 57 OR 58 OR 59 OR 60 OR 61 OR 62</p> <p>83. Systematic review terms - 63 OR 64 OR 65 OR 66 OR 67 OR 68 OR 69 OR 70 OR 71 OR 72 OR 73 OR 74</p> <p>84. Disease – 75 OR 76 OR 77 OR 78 OR 79 OR 80 OR 81</p> <p>85. 82 AND 83 AND 84</p> |

### Supplementary table 3 – Search strategy for systematic review of original articles focusing on exercise in RMDs

| Category | Term                                                                                                                                                                                                                                                                                                                                                                                                                                                                                                                                                                                                                                                                                                                                                                                                                                                                                                                                                                                                                                                                                                                                                                                                                                                                                                                                                                                                                                                                                                                                                                                                                                                                                                                                                                                                                                           |
|----------|------------------------------------------------------------------------------------------------------------------------------------------------------------------------------------------------------------------------------------------------------------------------------------------------------------------------------------------------------------------------------------------------------------------------------------------------------------------------------------------------------------------------------------------------------------------------------------------------------------------------------------------------------------------------------------------------------------------------------------------------------------------------------------------------------------------------------------------------------------------------------------------------------------------------------------------------------------------------------------------------------------------------------------------------------------------------------------------------------------------------------------------------------------------------------------------------------------------------------------------------------------------------------------------------------------------------------------------------------------------------------------------------------------------------------------------------------------------------------------------------------------------------------------------------------------------------------------------------------------------------------------------------------------------------------------------------------------------------------------------------------------------------------------------------------------------------------------------------|
| Diseases | <ol style="list-style-type: none"> <li>1. Arthritis, Rheumatoid (mesh) (exp) (include all subheadings)</li> <li>2. Inflammatory \$arthritis</li> <li>3. Undifferentiated arthritis</li> <li>4. RA</li> <li>5. Atrophic arthritis</li> <li>6. Proliferative arthritis</li> <li>7. Arthritis psoriatica</li> <li>8. Arthropathic psoriasis</li> <li>9. Psoriatic arthropathy</li> <li>10. Arthritis, Psoriatic (mesh) (exp) (include all subheadings)</li> <li>11. Psoria\$ arthriti\$ [have to uncheck "map team to subject heading"]</li> <li>12. Psoria\$ arthropath\$ [have to uncheck "map team to subject heading"]</li> <li>13. Undifferentiated oligoarthritis</li> <li>14. Arthritic psoriasis</li> <li>15. PsA</li> <li>16. Ankylosing spondylitis (mesh) (exp) (include all subheadings)</li> <li>17. Ankylosi\$</li> <li>18. Spondyloarthr\$ [have to uncheck "map team to subject heading"]</li> <li>19. Spondylarthr\$ [have to uncheck "map team to subject heading"]</li> <li>20. Spondylitis (mesh) (exp) (include all subheadings)</li> <li>21. Bechtere\$ [have to uncheck "map team to subject heading"]</li> <li>22. Marie-Strumpell</li> <li>23. Spinal arthritis</li> <li>24. Lupus erythematosus, systemic (mesh) (exp) (include all subheadings)</li> <li>25. systemic lupus erythematosus</li> <li>26. SLE</li> <li>27. Libman-Sacks disease</li> <li>28. Libman Sacks disease</li> <li>29. Lupus erythematosus disseminatus</li> <li>30. Disseminated lupus erythematosus</li> <li>31. Lupus syndrome</li> <li>32. Scleroderma, Systemic (mesh) (exp) (include all subheadings)</li> <li>33. SSc</li> <li>34. Thibierge-Weissenbach syndrome</li> <li>35. Morphea</li> <li>36. Gout (mesh) (exp) (include all subheadings)</li> <li>37. Gout\$</li> <li>38. Podagra</li> <li>39. Tophus</li> <li>40. Tophi</li> </ol> |

|            |                                                                                                                                                                                                                                                                                                                                                                                                                                                                                                                                                                                                                                                                                                               |
|------------|---------------------------------------------------------------------------------------------------------------------------------------------------------------------------------------------------------------------------------------------------------------------------------------------------------------------------------------------------------------------------------------------------------------------------------------------------------------------------------------------------------------------------------------------------------------------------------------------------------------------------------------------------------------------------------------------------------------|
|            | <p>41. Tophaceous</p> <p>42. Urate</p> <p>43. Uric acid</p> <p>44. Hyperurecemi\$ [have to uncheck "map team to subject heading"]</p> <p>45. Hyperurecaemi\$ [have to uncheck "map team to subject heading"]</p> <p>46. Hyperuricemia\$</p> <p>47. Hyperuricaemi\$ [have to uncheck "map team to subject heading"]</p> <p>48. arthritis urica</p> <p>49. Gout acute</p>                                                                                                                                                                                                                                                                                                                                       |
| Exercise   | <p>50. Exercis\$</p> <p>51. Strength\$</p> <p>52. Endurance</p> <p>53. Cardiorespiratory</p> <p>54. Aerobic</p> <p>55. Aerobic training</p> <p>56. Exercise program\$</p> <p>57. Exercise therap\$ [have to uncheck "map team to subject heading"]</p> <p>58. Physical education</p> <p>59. Physical training</p> <p>60. Physical therapy</p> <p>61. Physiotherapy</p> <p>62. Muscle stretching</p> <p>63. Sport (mesh) (exp) (include all subheadings)</p> <p>64. Resistance</p> <p>65. Aquatic</p> <p>66. Yoga</p> <p>67. Tai-chi</p> <p>68. Tai chi</p> <p>69. Exercise therapy</p> <p>70. Fitness</p> <p>71. Running</p> <p>72. Cycling</p> <p>73. Sprinting</p> <p>74. Jogging</p> <p>75. Stretching</p> |
| Exclusions | <p>76. Cross-sectional</p> <p>77. Cross sectional</p> <p>78. Children</p> <p>79. Child</p> <p>80. Juvenile</p> <p>81. Animal</p> <p>82. Rat</p> <p>83. rats</p>                                                                                                                                                                                                                                                                                                                                                                                                                                                                                                                                               |



|                    |                                                                                                                                                                                                                                                                                                                                                                                                                                                                                                                                                                                                                                       |
|--------------------|---------------------------------------------------------------------------------------------------------------------------------------------------------------------------------------------------------------------------------------------------------------------------------------------------------------------------------------------------------------------------------------------------------------------------------------------------------------------------------------------------------------------------------------------------------------------------------------------------------------------------------------|
|                    | <p>84. Mouse</p> <p>85. Case study</p> <p>86. Case series</p> <p>87. Systematic adj5 review</p> <p>88. Narrative review</p> <p>89. Meta-analysis (mesh) (exp)</p> <p>90. Meta analysis</p> <p>91. Meta adj5 analysis</p> <p>92. Meta-synthesis</p> <p>93. Meta synthesis</p> <p>94. Meta adj5 synthesis</p> <p>95. Literature review</p> <p>96. Literature search</p> <p>97. Meta-narrative review</p> <p>98. Meta narrative review</p> <p>99. Vascular resistance</p> <p>100. Vascular resistance [mesh]</p>                                                                                                                         |
| Study design terms | <p>101. Randomised controlled trial</p> <p>102. Randomised control trial</p> <p>103. Randomized controlled trial (mesh) (exp)</p> <p>104. Randomized control trial</p> <p>105. RCT</p> <p>106. Clinical trial (mesh) (exp)</p> <p>107. Blind\$</p> <p>108. Cohort studies (mesh) (exp)</p> <p>109. Observational stud\$</p> <p>110. Case-control studies (mesh) (exp)</p> <p>111. Intervention stud\$</p> <p>112. Interventional stud\$</p> <p>113. Open label</p> <p>114. Longitudinal studies (mesh) (exp)</p> <p>115. Follow-up</p> <p>116. Follow up</p> <p>117. Prospectiv\$</p> <p>118. Retrospectiv\$</p> <p>119. Cohort\$</p> |
| Combining terms    | <p>120. RA – 1 OR 2 OR 3 OR 4 OR 5 OR 6</p> <p>121. PSA – 7 OR 8 OR 9 OR 10 OR 11 OR 12 OR 13 OR 14 OR 15</p> <p>122. AS – 16 OR 17 OR 18 OR 19 OR 20 OR 21 OR 22 OR 23</p> <p>123. SLE – 24 OR 25 OR 26 OR 27 OR 28 OR 29 OR 30 OR 31</p> <p>124. SSc – 32 OR 33 OR 34 OR 35</p> <p>125. Gout – 36 OR 37 OR 38 OR 39 OR 40 OR 41 OR 42 OR 43 OR 44 OR 45 OR 46 OR 47 OR 48 OR 49</p>                                                                                                                                                                                                                                                 |

|  |                                                                                                                                                                                                                                                                                                                                                                                                                                                                                                                                                                                                                                                                               |
|--|-------------------------------------------------------------------------------------------------------------------------------------------------------------------------------------------------------------------------------------------------------------------------------------------------------------------------------------------------------------------------------------------------------------------------------------------------------------------------------------------------------------------------------------------------------------------------------------------------------------------------------------------------------------------------------|
|  | <p>126. Diseases – 120 OR 121 OR 122 OR 123 OR 124 OR 125</p> <p>127. Exercise – 50 OR 51 OR 52 OR 53 OR 54 OR 55 OR 56 OR 57 OR 58 OR 59<br/>OR 60 OR 61 OR 62 OR 63 OR 64 OR 65 OR 66 OR 67 OR 68 OR 69 OR 70<br/>OR 71 OR 72 OR 73 OR 74 OR 75</p> <p>128. Exclusions – 76 OR 77 OR 78 OR 79 OR 80 OR 81 OR 82 OR 83 OR 84 OR<br/>85 OR 86 OR 87 OR 88 OR 89 OR 90 OR 91 OR 92 OR 93 OR 94 OR 95 OR<br/>96 OR 97 OR 98 OR 99 OR 100</p> <p>129. Study design terms – 101 OR 102 OR 103 OR 104 OR 105 OR 106 OR 107<br/>OR 108 OR 109 OR 110 OR 111 OR 112 OR 113 OR 114 OR 115 OR 116 OR<br/>117 OR 118 OR 119</p> <p>130. 126 AND 127 AND 129</p> <p>131. 130 NOT 128</p> |
|--|-------------------------------------------------------------------------------------------------------------------------------------------------------------------------------------------------------------------------------------------------------------------------------------------------------------------------------------------------------------------------------------------------------------------------------------------------------------------------------------------------------------------------------------------------------------------------------------------------------------------------------------------------------------------------------|

### Supplementary table 4 – Search strategy for systematic review of original articles focusing on weight in RMDs

| Category | Term                                                                                                                                                                                                                                                                                                                                                                                                                                                                                                                                                                                                                                                                                                                                                                                                                                                                                                                                                                                                                                                                                                                                                                                                                                                                                                                                                                                                                                                                                                                                                                                                                                                                                                                                                                                                                |
|----------|---------------------------------------------------------------------------------------------------------------------------------------------------------------------------------------------------------------------------------------------------------------------------------------------------------------------------------------------------------------------------------------------------------------------------------------------------------------------------------------------------------------------------------------------------------------------------------------------------------------------------------------------------------------------------------------------------------------------------------------------------------------------------------------------------------------------------------------------------------------------------------------------------------------------------------------------------------------------------------------------------------------------------------------------------------------------------------------------------------------------------------------------------------------------------------------------------------------------------------------------------------------------------------------------------------------------------------------------------------------------------------------------------------------------------------------------------------------------------------------------------------------------------------------------------------------------------------------------------------------------------------------------------------------------------------------------------------------------------------------------------------------------------------------------------------------------|
| Diseases | <ol style="list-style-type: none"> <li>1. Arthritis, Rheumatoid (mesh) (exp) (include all subheadings)</li> <li>2. Inflammatory \$arthritis</li> <li>3. Undifferentiated arthritis</li> <li>4. RA</li> <li>5. Atrophic arthritis</li> <li>6. Proliferative arthritis</li> <li>7. Osteoarth\$</li> <li>8. Arthrosis</li> <li>9. Degenerative joint disease</li> <li>10. Hypertrophic arthritis</li> <li>11. Arthropathy</li> <li>12. Polyarthritis</li> <li>13. OA</li> <li>14. Arthritis psoriatica</li> <li>15. Arthropathic psoriasis</li> <li>16. Psoriatic arthropathy</li> <li>17. Arthritis, Psoriatic (mesh) (exp) (include all subheadings)</li> <li>18. Psoria\$ arthriti\$ [have to uncheck “map team to subject heading”]</li> <li>19. Psoria\$ arthropath\$ [have to uncheck “map team to subject heading”]</li> <li>20. Undifferentiated oligoarthritis</li> <li>21. Arthritic psoriasis</li> <li>22. PsA</li> <li>23. Ankylosing spondylitis (mesh) (exp) (include all subheadings)</li> <li>24. Ankylosi\$</li> <li>25. Spondyloarthr\$ [have to uncheck “map team to subject heading”]</li> <li>26. Spondylarthr\$ [have to uncheck “map team to subject heading”]</li> <li>27. Spondylitis (mesh) (exp) (include all subheadings)</li> <li>28. Bechtere\$ [have to uncheck “map team to subject heading”]</li> <li>29. Marie-Strumpell</li> <li>30. Spinal arthritis</li> <li>31. Lupus erythematosus, systemic (mesh) (exp) (include all subheadings)</li> <li>32. systemic lupus erythematosus</li> <li>33. SLE</li> <li>34. Libman-Sacks disease</li> <li>35. Libman Sacks disease</li> <li>36. Lupus erythematosus disseminatus</li> <li>37. Disseminated lupus erythematosus</li> <li>38. Lupus syndrome</li> <li>39. Scleroderma, Systemic (mesh) (exp) (include all subheadings)</li> </ol> |

|            |                                                                                                                                                                                                                                                                                                                                                                                                                                                                                                                                                                                    |
|------------|------------------------------------------------------------------------------------------------------------------------------------------------------------------------------------------------------------------------------------------------------------------------------------------------------------------------------------------------------------------------------------------------------------------------------------------------------------------------------------------------------------------------------------------------------------------------------------|
|            | <p>40. SSc</p> <p>41. Thibierge-Weissenbach syndrome</p> <p>42. Morphea</p> <p>43. Gout (mesh) (exp) (include all subheadings)</p> <p>44. Gout\$</p> <p>45. Podagra</p> <p>46. Tophus</p> <p>47. Tophi</p> <p>48. Tophaceous</p> <p>49. Urate</p> <p>50. Uric acid</p> <p>51. Hyperurecemi\$ [have to uncheck "map team to subject heading"]</p> <p>52. Hyperurecaemi\$ [have to uncheck "map team to subject heading"]</p> <p>53. Hyperuricemia\$</p> <p>54. Hyperuricaemi\$ [have to uncheck "map team to subject heading"]</p> <p>55. arthritis urica</p> <p>56. Gout acute</p> |
| Weight     | <p>57. Bod\$y Weight (mesh) (exp) (include all subheadings)</p> <p>58. Weight change</p> <p>59. Weight loss (mesh) (exp) (include all subheadings)</p> <p>60. Weight reduction</p> <p>61. Weight gain</p> <p>62. obesity</p> <p>63. Anti obesity</p> <p>64. Anti-obesity</p> <p>65. Antiobesity</p> <p>66. Slimming</p> <p>67. BMI</p> <p>68. Body mass index</p> <p>69. Adiposity</p> <p>70. Body adiposity index</p> <p>71. Weight control</p> <p>72. Total body mass</p> <p>73. Bariatric</p>                                                                                   |
| Exclusions | <p>74. Cross-sectional</p> <p>75. Cross sectional</p> <p>76. Children</p> <p>77. Child</p> <p>78. Juvenile</p> <p>79. Adolescent</p> <p>80. Teenager</p> <p>81. Animal</p> <p>82. Rat</p>                                                                                                                                                                                                                                                                                                                                                                                          |

|                    |                                                                                                                                                                                                                                                                                                                                                                                                                                                                                                                                                                                                                                                                                 |
|--------------------|---------------------------------------------------------------------------------------------------------------------------------------------------------------------------------------------------------------------------------------------------------------------------------------------------------------------------------------------------------------------------------------------------------------------------------------------------------------------------------------------------------------------------------------------------------------------------------------------------------------------------------------------------------------------------------|
|                    | <p>83. rats</p> <p>84. Mouse</p> <p>85. mice</p> <p>86. Case study</p> <p>87. Case series</p> <p>88. Systematic adj5 review</p> <p>89. Narrative review</p> <p>90. Meta-analysis (mesh) (exp)</p> <p>91. Meta analysis</p> <p>92. Meta adj5 analysis</p> <p>93. Meta-synthesis</p> <p>94. Meta synthesis</p> <p>95. Meta adj5 synthesis</p> <p>96. Literature review</p> <p>97. Literature search</p> <p>98. Meta-narrative review</p> <p>99. Meta narrative review</p> <p>100. Prostate cancer</p> <p>101. Prostatic neoplasms (mesh) (exp)</p> <p>102. Infectious arthritis</p> <p>103. Arthroplasty</p> <p>104. Total hip replacement</p> <p>105. Total knee replacement</p> |
| Study design terms | <p>106. Randomised controlled trial</p> <p>107. Randomised control trial</p> <p>108. Randomized controlled trial (mesh) (exp)</p> <p>109. Randomized control trial</p> <p>110. RCT</p> <p>111. Clinical trial (mesh) (exp)</p> <p>112. Blind\$</p> <p>113. Cohort studies (mesh) (exp)</p> <p>114. Observational stud\$</p> <p>115. Case-control studies (mesh) (exp)</p> <p>116. Intervention stud\$</p> <p>117. Interventional stud\$</p> <p>118. Open label</p> <p>119. Longitudinal studies (mesh) (exp)</p> <p>120. Follow-up</p> <p>121. Follow up</p> <p>122. Prospectiv\$</p> <p>123. Retrospectiv\$</p> <p>124. Cohort\$</p>                                           |

|                 |                                                                                                                                                                                                                                                                                                                                                                                                                                                                                                                                                                                                                                                                                                                                                                                                                                                                                                                                                                                                                                                                              |
|-----------------|------------------------------------------------------------------------------------------------------------------------------------------------------------------------------------------------------------------------------------------------------------------------------------------------------------------------------------------------------------------------------------------------------------------------------------------------------------------------------------------------------------------------------------------------------------------------------------------------------------------------------------------------------------------------------------------------------------------------------------------------------------------------------------------------------------------------------------------------------------------------------------------------------------------------------------------------------------------------------------------------------------------------------------------------------------------------------|
| Combining terms | 125. RA – 1 OR 2 OR 3 OR 4 OR 5 OR 6<br>126. OA – 7 OR 8 OR 9 OR 10 OR 11 OR 12 OR 13<br>127. PSA – 14 OR 15 OR 16 OR 17 OR 18 OR 19 OR 20 OR 21 OR 22<br>128. AS – 23 OR 24 OR 25 OR 26 OR 27 OR 28 OR 29 OR 30<br>129. SLE – 31 OR 32 OR 33 OR 34 OR 35 OR 36 OR 37 OR 38<br>130. SSc – 39 OR 40 OR 41 OR 42<br>131. Gout – 43 OR 44 OR 45 OR 46 OR 47 OR 48 OR 49 OR 50 OR 51 OR 52<br>OR 53 OR 54 OR 55 OR 56<br>132. Diseases – 125 OR 126 OR 127 OR 128 OR 129 OR 130 OR 131<br>133. Weight – 57 OR 59 OR 60 OR 61 OR 62 OR 63 OR 64 OR 65 OR 66 OR<br>67 OR 68 OR 69 OR 70 OR 71 OR<br>72 OR 73<br>134. Exclusions – 74 OR 75 OR 76 OR 77 OR 78 OR 79 OR 80 OR 81 OR 82<br>OR 83 OR 84 OR 85 OR 86 OR 87<br>OR 88 OR 89 OR 90 OR 91 OR 92<br>OR 93 OR 94 OR 95 OR 96 OR 97<br>OR 98 OR 99 OR 100 OR 101 OR<br>102 OR 103 OR 104 OR 105<br>135. Study design terms – 106 OR 107 OR 108 OR 109 OR 110 OR 111 OR<br>112 OR 113 OR 114 OR 115 OR<br>116 OR 117 OR 118 OR 119 OR<br>120 OR 121 OR 122 OR 123 OR<br>124<br><br>136. 132 AND 133 AND 135<br>137. 136 NOT 134 |
|-----------------|------------------------------------------------------------------------------------------------------------------------------------------------------------------------------------------------------------------------------------------------------------------------------------------------------------------------------------------------------------------------------------------------------------------------------------------------------------------------------------------------------------------------------------------------------------------------------------------------------------------------------------------------------------------------------------------------------------------------------------------------------------------------------------------------------------------------------------------------------------------------------------------------------------------------------------------------------------------------------------------------------------------------------------------------------------------------------|

## Supplementary table 5 – Included outcomes and examples of measures used to assess these outcomes

|                                                                                                                                                                                                                                                                                                                                                                                                                                                                                                                                                                                                                                                                                                                                                                                                                                                                                                                                                                                                                                                                                                                                                                                                                                                                                                                                                                                                                                                                                                                                                                                                                                                                                                                                                                                                                                                                                                                                                                                                                                                                                                                                                                                                                                                                                                                                                                                                                                                                                                                                                                                                                                                                                                                                                                                                                                                                           |
|---------------------------------------------------------------------------------------------------------------------------------------------------------------------------------------------------------------------------------------------------------------------------------------------------------------------------------------------------------------------------------------------------------------------------------------------------------------------------------------------------------------------------------------------------------------------------------------------------------------------------------------------------------------------------------------------------------------------------------------------------------------------------------------------------------------------------------------------------------------------------------------------------------------------------------------------------------------------------------------------------------------------------------------------------------------------------------------------------------------------------------------------------------------------------------------------------------------------------------------------------------------------------------------------------------------------------------------------------------------------------------------------------------------------------------------------------------------------------------------------------------------------------------------------------------------------------------------------------------------------------------------------------------------------------------------------------------------------------------------------------------------------------------------------------------------------------------------------------------------------------------------------------------------------------------------------------------------------------------------------------------------------------------------------------------------------------------------------------------------------------------------------------------------------------------------------------------------------------------------------------------------------------------------------------------------------------------------------------------------------------------------------------------------------------------------------------------------------------------------------------------------------------------------------------------------------------------------------------------------------------------------------------------------------------------------------------------------------------------------------------------------------------------------------------------------------------------------------------------------------------|
| <ul style="list-style-type: none"> <li>• Disease activity <ul style="list-style-type: none"> <li>○ OA <ul style="list-style-type: none"> <li>▪ Western Ontario and McMaster Universities Arthritis Index [WOMAC]</li> </ul> </li> <li>○ RA <ul style="list-style-type: none"> <li>▪ Acute phase reactants (i.e. C-reactive protein and erythrocyte sedimentation rate)</li> <li>▪ Swollen joint count</li> <li>▪ Tender joint count</li> <li>▪ Physician global assessment of disease activity (VAS)</li> <li>▪ Patient global health (VAS)</li> <li>▪ Disease activity composite measures (eg. Disease Activity Score [DAS28, DAS44], Rheumatoid arthritis Impact of Disease Score [RAID])</li> </ul> </li> <li>○ PsA<sup>1</sup> <ul style="list-style-type: none"> <li>▪ Acute phase reactants (i.e. C-reactive protein and erythrocyte sedimentation rate)</li> <li>▪ Swollen joint count</li> <li>▪ Tender joint count</li> <li>▪ Physician global assessment of disease activity (VAS)</li> <li>▪ Patient global assessment of disease activity (VAS)</li> <li>▪ Dactylitis (e.g. Leeds dactylitis index)</li> <li>▪ Enthesitis (e.g. Mander/Newcastle Enthesitis Index, Leeds Enthesitis index)</li> <li>▪ Extent of psoriasis (e.g. Psoriasis Area and Severity Index [PASI])</li> <li>▪ Nail involvement (e.g. Nail Psoriasis Severity Index)</li> <li>▪ Disease activity composite measures (e.g. Composite Psoriatic Disease Activity Index [CPDAI], Disease Activity in Psoriatic Arthritis [DAPSA], clinical Disease Activity in Psoriatic Arthritis [cDAPSA], PsA Impact of Disease Score [PsAID] Psoriatic Arthritis Disease Activity Score [PASDAS])</li> </ul> </li> <li>○ AS<sup>2</sup> <ul style="list-style-type: none"> <li>▪ Acute phase reactants (i.e. C-reactive protein and erythrocyte sedimentation rate)</li> <li>▪ Swollen joint count</li> <li>▪ Tender joint count</li> <li>▪ Disease activity composite measures (e.g. Ankylosing Spondylitis Disease Activity Score [ASDAS], Bath Ankylosing Spondylitis Disease Activity Index [BASDAI], Disease Activity Score [DAS44])</li> <li>▪ Enthesitis</li> <li>▪ Spinal mobility (e.g. Bath Ankylosing Spondylitis Metrology Index [BASMI])</li> <li>▪ Stiffness</li> </ul> </li> <li>○ SLE<sup>3</sup> <ul style="list-style-type: none"> <li>▪ Disease activity composite measures (e.g. British Isles Lupus Assessment Group measure [BILAG], Systemic Lupus Erythematosus Disease Activity Index [SLEDAI])</li> <li>▪ Organ damage measures (e.g. Systemic Lupus International Collaborating Clinics (SLICC)/American College of Rheumatology Damage Index [SDI])</li> </ul> </li> <li>○ SSC<sup>4</sup> <ul style="list-style-type: none"> <li>▪ Skin (e.g. Modified Rodnan skin score, visual analogue scale [VAS]/likert scale, Durometer reading)</li> </ul> </li> </ul> </li> </ul> |
|---------------------------------------------------------------------------------------------------------------------------------------------------------------------------------------------------------------------------------------------------------------------------------------------------------------------------------------------------------------------------------------------------------------------------------------------------------------------------------------------------------------------------------------------------------------------------------------------------------------------------------------------------------------------------------------------------------------------------------------------------------------------------------------------------------------------------------------------------------------------------------------------------------------------------------------------------------------------------------------------------------------------------------------------------------------------------------------------------------------------------------------------------------------------------------------------------------------------------------------------------------------------------------------------------------------------------------------------------------------------------------------------------------------------------------------------------------------------------------------------------------------------------------------------------------------------------------------------------------------------------------------------------------------------------------------------------------------------------------------------------------------------------------------------------------------------------------------------------------------------------------------------------------------------------------------------------------------------------------------------------------------------------------------------------------------------------------------------------------------------------------------------------------------------------------------------------------------------------------------------------------------------------------------------------------------------------------------------------------------------------------------------------------------------------------------------------------------------------------------------------------------------------------------------------------------------------------------------------------------------------------------------------------------------------------------------------------------------------------------------------------------------------------------------------------------------------------------------------------------------------|

- Musculoskeletal (e.g. tender joint count, tender friction rubs assessed by doctor, serum creatinine)
    - Cardiac / pulmonary / renal / gastrointestinal involvement
    - Raynaud's phenomenon (e.g. Raynaud condition score, VAS raynauds)
    - Digital ulcers (e.g. activity digital tip ulcer count on volar surface, VAS digital ulcer)
    - Acute phase reactants (i.e. C-reactive protein and erythrocyte sedimentation rate)
  - Gout <sup>5</sup>
    - Serum urate
    - Gout flare recurrence
    - Tophus regression <sup>6</sup> / tophi number
    - Joint inflammation / tenderness score
- Physical functioning
  - OA
    - Physical function (e.g. the Knee Injury and Osteoarthritis Outcome Score [KOOS], Veterans Short Form 12 Health Survey [VR-12], Hip disability and Osteoarthritis Outcome Score [HOOS], WOMAC).
    - Objective measures (e.g. gait speed, grip strength)
    - Range of motion of effected joint
  - RA
    - Physical function (e.g. the Health Assessment Questionnaire [HAQ], Arthritis Impact Measurement Scale [AIMS], SF36-physical function)
    - Objective measures (e.g. gait speed, grip strength)
  - PsA
    - Physical function (e.g. the HAQ, Arthritis Impact Measurement Scale [AIMS], SF36-physical function)
    - Objective measures (e.g. gait speed, grip strength)
  - AS
    - Physical function (e.g. Health Assessment Questionnaire for the Spondylarthropathies [HAQ-S], Dougados Functional Index [DFI], Bath Ankylosing Spondylitis Functional Index [BASFI])
    - Objective measures (e.g. gait speed, grip strength)
  - SLE <sup>7</sup>
    - Physical function (e.g. the HAQ, SF-36 physical function, Valued Life Activities Disability Scale)
    - Objective measures (e.g. gait speed, grip strength)
  - SSc
    - Physical function (e.g. the HAQ, SF-36).
    - Objective measures (e.g. gait speed, grip strength)
  - Gout
    - Physical function (e.g. HAQ <sup>5,8</sup>, SF-36)
    - Objective measures (e.g. gait speed, grip strength)
- Pain
  - OA <sup>9</sup>
    - OARSI-OMERACT Initiative: New OA Pain Measure
    - Dallas Pain Questionnaire
    - Neck Pain and Disability Scale [NPAD]
    - WOMAC
    - Australian/Canadian Hand OA Index (AUSCAN)
  - RA



- Patient pain rating (e.g. visual analogue scale)
- PSA
  - Patient pain rating (e.g. visual analogue scale)
- AS
  - Patient pain rating (e.g. visual analogue scale)
- SLE
  - Patient pain rating (e.g. visual analogue scale)
- SSc
  - Patient pain rating (e.g. visual analogue scale)
- Gout
  - Patient pain rating (e.g. visual analogue scale / likert scale) <sup>10</sup>
- Fatigue
  - OA
    - Patient fatigue rating (e.g. visual analogue scale, other disease specific measure)
    - Generic fatigue questionnaire (e.g. Chalder Fatigue Scale)
  - RA
    - Patient fatigue rating (e.g. visual analogue scale, other disease specific measure)
    - Generic fatigue questionnaire (e.g. Chalder Fatigue Scale)
    - Bristol Rheumatoid Arthritis Fatigue – multidimensional questionnaire (BRAFF-MDQ)
  - PSA
    - Patient fatigue rating (e.g. visual analogue scale, other disease specific measure)
    - Generic fatigue questionnaire (e.g. Chalder Fatigue Scale)
  - AS
    - Patient fatigue rating (e.g. visual analogue scale, other disease specific measure)
    - Generic fatigue questionnaire (e.g. Chalder Fatigue Scale)
  - SLE
    - Patient fatigue rating (e.g. visual analogue scale, other disease specific measure)
    - Generic fatigue questionnaire (e.g. Chalder Fatigue Scale)
  - SSc
    - Patient fatigue rating (e.g. visual analogue scale, other disease specific measure)
    - Generic fatigue questionnaire (e.g. Chalder Fatigue Scale)
  - Gout
    - Patient fatigue rating (e.g. visual analogue scale, other disease specific measure)
    - Generic fatigue questionnaire (e.g. Chalder Fatigue Scale)
- Erosions
  - Joint damage by X-ray (e.g. Sharp method, Larsen method, Lane Index, Wilke Index, Kellgren-Lawrence hand OA radiological index <sup>9</sup>)
- Physical comorbidity
  - Major comorbidity
    - MACE (major adverse cardiac event)
    - Lung disease
    - Peptic ulcer disease
    - Liver disease

- Renal disease
- Tuberculosis / other serious infections
- Diabetes
- Hyperthyroidism
- Depression
- Cancer
- Fractures
- High cholesterol / dyslipidaemia
- Mental health
  - Mental health assessment questionnaires (e.g. Hospital Anxiety and Depression Scale (HADS), the AIMS, Mini-mental state examination)
- Quality of life (e.g. EQ-5D, SF-36)
  - Disease specific quality of life measures (e.g. RaQOL <sup>11</sup>, ASQOL <sup>12</sup>, PsAQoL <sup>13</sup>)
- Work status
  - Categorical rating of work status (e.g. at work, retired, sick leave)
  - Number of days absent from work in a given time window

## Supplementary table 6 – Description of reviews of aerobic exercise in OA

Table – Aerobic exercise (OA), description of reviews

| Authors (date)                      | Review type | Study type included | Type of OA         | Exposure detail                            | Number of studies included | Funders                                                                                                   |
|-------------------------------------|-------------|---------------------|--------------------|--------------------------------------------|----------------------------|-----------------------------------------------------------------------------------------------------------|
| Juhl (2014) <sup>14</sup>           | MA          | RCTs                | Knee               | Aerobic exercise                           | 9                          | <b>Charity</b> (Health Insurance Foundation), <b>Professional body</b> (Danish Physiotherapy Association) |
| Corbett (2013) <sup>15</sup>        | MA          | RCTs                | Knee               | Aerobic exercise                           | 114 §                      | <b>Government</b> (National Institute for Health Research [NIHR])                                         |
| Tanaka (2013) <sup>16</sup>         | MA          | RCTs                | Knee               | Aerobic exercise                           | 3                          | <b>No funding</b>                                                                                         |
| Uthman (2013) <sup>17</sup>         | MA          | RCTs                | Knee, hip          | Aerobic exercise                           | 60 §                       | <b>Government</b> (National Institute for Health Research [NIHR])                                         |
| Pozzobon (2018) <sup>18</sup>       | SR          | Observational       | Knee, hip          | Aerobic exercise prior to surgery          | 4                          | <b>No funding</b>                                                                                         |
| Wijnen (2018) <sup>19</sup>         | SR          | RCTs                | Hip (post-surgery) | Aerobic exercise                           | 2                          | <b>No funding</b>                                                                                         |
| Alrushud (2017) <sup>20</sup>       | SR          | RCTs                | Knee               | Aerobic exercise + dietary intervention    | 3                          | <b>Government</b> (Saudi Arabian Cultural Bureau), <b>University</b> (King Saud University)               |
| Brosseau et al (2017) <sup>21</sup> | SR          | RCTs                | Knee               | Aerobic exercise                           | 5                          | <b>University</b> (University of Ottawa Research Chair)                                                   |
| de Rooij (2016) <sup>22</sup>       | SR          | Observational       | Knee               | Aerobic exercise                           | 58                         | <b>Professional body</b> (Royal Dutch Society for Physical Therapy)                                       |
| Bastick (2015) <sup>23</sup>        | SR          | Observational       | Knee               | Aerobic exercise                           | 6                          | <b>Charity</b> (Dutch Arthritis Foundation)                                                               |
| Le Quintrec (2014) <sup>24</sup>    | SR          | RCTs                | Knee, hip          | Aerobic exercise in patients ≥70 years old | 8                          | <b>Not reported</b> – authors declare no conflict of interest                                             |

§ Network meta-analysis looking at a range of exposures

MA = meta-analysis, OA = osteoarthritis, RCT = randomised controlled trial, SR = systematic review

## Supplementary table 7 – Results from reviews of aerobic exercise studies in OA

Table – Aerobic exercise (OA), results and quality assessment

| Outcome (outcome measure) | Study (date) [study type]             | Standardised result, SMD (95% CI) unless otherwise stated            | Natural result                                                                                                                                                        | AMSTAR2 quality | Rand. Seq. | Alloc. Conc. | Blind. Part. | Blind. Asses. |
|---------------------------|---------------------------------------|----------------------------------------------------------------------|-----------------------------------------------------------------------------------------------------------------------------------------------------------------------|-----------------|------------|--------------|--------------|---------------|
| Pain                      | Juhl (2014) [MA] <sup>14</sup>        | <u>Aerobic exercise vs no exercise</u><br>SMD -0.61 (-0.75, -0.48)   |                                                                                                                                                                       | Moderate        |            |              |              |               |
|                           | Corbett (2013) [MA] <sup>15</sup>     | <u>Aerobic exercise vs no exercise</u><br>SMD -0.55 (-0.89, -0.21)   |                                                                                                                                                                       | Moderate        |            |              |              |               |
|                           | Tanaka (2013) [MA] <sup>16</sup>      | <u>Aerobic exercise vs no exercise</u><br>SMD -0.45 (-0.77, -0.13)   |                                                                                                                                                                       | Moderate        |            |              |              |               |
|                           | Uthman (2013) [MA] <sup>17</sup>      | <u>Aerobic exercise vs no exercise</u><br>SMD -0.41 (-1.13, 0.30)    |                                                                                                                                                                       | Moderate        |            |              |              |               |
|                           | Pozzobon (2018) [SR] <sup>18</sup>    |                                                                      | Patients who did more physical activity prior to surgery had less pain after surgery                                                                                  | Low             |            |              |              |               |
|                           | Alrushad (2017) [SR] <sup>20</sup>    | <u>Aerobic exercise vs no exercise</u><br>SMD -0.24 (-0.50, 0.02) §  |                                                                                                                                                                       | Moderate        |            |              |              |               |
|                           | Brosseau (2017) [SR] <sup>21</sup>    |                                                                      | One study reported improvements in pain                                                                                                                               | Moderate        |            |              |              |               |
|                           | de Rooij (2016) [SR] <sup>22</sup>    |                                                                      | Amount of general physical activity, practicing different sports and amount of sport did not predict pain levels. Physical activity at baseline weakly predicted pain | Moderate        |            |              |              |               |
|                           | Le Quintrec (2014) [SR] <sup>24</sup> |                                                                      | 4/5 trials reported improvements in pain after aerobic exercise in older adults over controls                                                                         | Critically low  |            |              |              |               |
| Function                  | Juhl (2014) [MA] <sup>14</sup>        | <u>Aerobic exercise vs no exercise</u><br>SMD -0.58 (-0.75, -0.40)   |                                                                                                                                                                       | Moderate        |            |              |              |               |
|                           | Uthman (2013) [MA] <sup>17</sup>      | <u>Aerobic exercise vs no exercise</u><br>SMD -0.30 (-1.53, 0.92)    |                                                                                                                                                                       | Moderate        |            |              |              |               |
|                           | Pozzobon (2018) [SR] <sup>18</sup>    |                                                                      | The evidence of an association between aerobic activity and improved function following surgery was less clear                                                        | Low             |            |              |              |               |
|                           | Wijnen (2018) [SR] <sup>19</sup>      |                                                                      | 1/2 studies reported improvements in function                                                                                                                         | Moderate        |            |              |              |               |
|                           | Alrushad (2017) [SR] <sup>20</sup>    | <u>Aerobic exercise vs no exercise</u><br>SMD -0.34 (-0.59, -0.08) § |                                                                                                                                                                       | Moderate        |            |              |              |               |
|                           | Brosseau (2017) [SR] <sup>21</sup>    |                                                                      | One study reported improvements in function                                                                                                                           | Moderate        |            |              |              |               |
|                           | Le Quintrec (2014) [SR] <sup>24</sup> |                                                                      | 4/5 trials reported improvements in function after aerobic exercise in older adults over controls                                                                     | Critically low  |            |              |              |               |
|                           | de Rooij (2016) [SR] <sup>22</sup>    |                                                                      | Physical activity was weakly associated with predicted function                                                                                                       | Moderate        |            |              |              |               |
| QoL                       | Brosseau (2017) [SR] <sup>21</sup>    |                                                                      | One study reported improvements in QoL                                                                                                                                | Moderate        |            |              |              |               |
| Radiographic progression  | Bastick (2015) [SR] <sup>23</sup>     |                                                                      | 0/2 studies of running and 1/6 studies of regular sports reported an associated with radiographic progression                                                         | Moderate        |            |              |              |               |

§ Calculated from one study included in the review that reported on function – pain<sup>25</sup>, function<sup>26</sup>; Alloc. Conc. = allocation concealment, AMSTAR2 = Assessing the Methodological Quality of Systematic Reviews, BL = baseline, Blind. Asses. = Blinded assessors, Blind. Part. = blinded participants, CI = confidence interval, H/UC = high / unclear risk of bias, L = low risk of bias, MA = meta-analysis, OA = osteoarthritis, QoL = Quality of Life, Rand. Seq. = random sequence generation, RCT = randomised controlled trial, SD = standard deviation, SMD = standardised mean difference, SR = systematic review

## Supplementary table 8 – Description of reviews of aquatic exercise in OA

Table – Aquatic exercise (OA), description of reviews

| Authors (date)                   | Review type | Study type included | Type of OA | Exposure detail                              | Number of studies included | Funders                                                                            |
|----------------------------------|-------------|---------------------|------------|----------------------------------------------|----------------------------|------------------------------------------------------------------------------------|
| Beumer (2016) <sup>27</sup>      | MA          | RCTs                | Hip        | Aquatic exercise                             | 4                          | <b>Not reported</b> – authors declare no conflicts of interest                     |
| Bartels (2016) <sup>28</sup>     | MA          | RCTs                | Knee, hip  | Aquatic exercise                             | 13                         | <b>Charity</b> (Oak Foundation), <b>University</b> (Copenhagen University Library) |
| Lu (2015) <sup>29</sup>          | MA          | RCTs                | Knee       | Aquatic exercise                             | 6                          | <b>Government</b> (State Administration of Traditional Chinese Medicine)           |
| Waller (2014) <sup>30</sup>      | MA          | RCTs                | Knee, hip  | Aquatic exercise                             | 11                         | <b>Government</b> (Academy of Finland, Social Insurance Institution of Finland)    |
| Uthman (2013) <sup>17</sup>      | MA          | RCTs                | Knee, hip  | Aquatic exercise                             | 60 §                       | <b>Government</b> (National Institute for Health Research [NIHR])                  |
| Le Quintrec (2014) <sup>24</sup> | SR          | RCTs                | Knee, hip  | Aquatic exercise in patients ≥70 years old   | 5                          | <b>Not reported</b> – authors declare no conflict of interest                      |
| McAlindon (2014) <sup>31</sup>   | SR          | MA, SR, RCTs        | Knee       | Aquatic exercise                             | 1                          | <b>Professional body</b> (OARSI)                                                   |
| Romeo (2013) <sup>32</sup>       | SR          | RCTs                | Hip        | Aquatic exercise [studies published 2007-12] | 2                          | <b>Not reported</b>                                                                |

§ Network meta-analysis looking at a range of exposures

MA = meta-analysis, OA = osteoarthritis, OARSI = Osteoarthritis Research Society International, RCT = randomised controlled trial, SR = systematic review

## Supplementary table 9 – Results from reviews of aquatic exercise studies in OA

Table – Aquatic exercise (OA), results and quality assessment

| Outcome (outcome measure) | Study (date) [study type]             | Standardised result, SMD (95% CI) unless otherwise stated                                                                                                                                                                                                                                                                    | Natural result                                                                                                            | AMSTAR2 quality | Rand. Seq. | Alloc. Conc. | Blind. Part. | Blind. Asses. |
|---------------------------|---------------------------------------|------------------------------------------------------------------------------------------------------------------------------------------------------------------------------------------------------------------------------------------------------------------------------------------------------------------------------|---------------------------------------------------------------------------------------------------------------------------|-----------------|------------|--------------|--------------|---------------|
| Pain                      | Beumer (2016) [MA] <sup>27</sup>      | <u>Aquatic exercise vs no exercise</u><br>SMD -0.53 (-0.96, -0.10)                                                                                                                                                                                                                                                           |                                                                                                                           | Moderate        |            |              |              |               |
|                           | Bartels (2016) [MA] <sup>28</sup>     | <u>Aquatic exercise vs no exercise</u><br>SMD -0.31 (-0.47, -0.15)                                                                                                                                                                                                                                                           |                                                                                                                           | High            |            |              |              |               |
|                           | Lu (2015) [MA] <sup>29</sup>          | <u>Aquatic exercise vs no exercise</u><br>SMD -1.16 (-3.03, 0.71)                                                                                                                                                                                                                                                            |                                                                                                                           | Moderate        |            |              |              |               |
|                           | Waller (2014) [MA] <sup>30</sup>      | <u>Aquatic exercise vs no exercise</u><br>SMD -0.26 (-0.41, -0.11)                                                                                                                                                                                                                                                           |                                                                                                                           | Moderate        |            |              |              |               |
|                           | Uthman (2013) [MA] <sup>17</sup>      | <u>Aquatic exercise vs no exercise</u><br>Aquatic strengthening SMD -0.75 (-1.42, -0.07);<br>Aquatic flexibility + strengthening SMD -0.96 (-1.64, -0.27);<br>Aquatic flexibility + aerobic SMD -0.07 (-0.98, 0.83);<br>Aquatic strengthening + aerobic SMD -0.92 (-2.08, 0.25);<br>Aquatic combined SMD -0.45 (-1.02, 0.11) |                                                                                                                           | Moderate        |            |              |              |               |
|                           | Le Quintrec (2014) [SR] <sup>24</sup> |                                                                                                                                                                                                                                                                                                                              | 2/2 studies reported aquatic exercise was better than no exercise for pain                                                | Critically low  |            |              |              |               |
|                           | McAlindon (2014) [SR] <sup>31</sup>   |                                                                                                                                                                                                                                                                                                                              | Identified one systematic review <sup>33</sup> that reported minor short-term benefits of aquatic exercise on pain        | Moderate        |            |              |              |               |
| Function                  | Bartels (2016) [MA] <sup>28</sup>     | <u>Aquatic exercise vs no exercise</u><br>SMD -0.32 (-0.47, -0.17)                                                                                                                                                                                                                                                           |                                                                                                                           | High            |            |              |              |               |
|                           | Lu (2015) [MA] <sup>29</sup>          | <u>Aquatic exercise vs no exercise</u><br>SMD -0.55 (-0.94, -0.16)                                                                                                                                                                                                                                                           |                                                                                                                           | Moderate        |            |              |              |               |
|                           | Waller (2014) [MA] <sup>30</sup>      | <u>Aquatic exercise vs no exercise</u><br>Self-report: SMD -0.30 (-0.43, -0.18)<br>Objective measure: SMD -0.22 (-0.38, -0.07)                                                                                                                                                                                               |                                                                                                                           | Moderate        |            |              |              |               |
|                           | Uthman (2013) [MA] <sup>17</sup>      | <u>Aquatic exercise vs no exercise</u><br>Aquatic strengthening SMD -0.43 (-1.42, 0.56);<br>Aquatic flexibility + strengthening SMD -0.61 (-1.75, -0.52);<br>Aquatic flexibility + aerobic SMD 0.07 (-1.23, 1.36);<br>Aquatic strengthening + aerobic SMD -0.86 (-2.52, 0.79),<br>Aquatic combined SMD -0.49 (-1.32, 0.33)   |                                                                                                                           | Moderate        |            |              |              |               |
|                           | Le Quintrec (2014) [SR] <sup>24</sup> |                                                                                                                                                                                                                                                                                                                              | 2/2 studies reported aquatic exercise was better than no exercise for function                                            | Critically low  |            |              |              |               |
|                           | McAlindon (2014) [SR] <sup>31</sup>   |                                                                                                                                                                                                                                                                                                                              | Identified one systematic review <sup>33</sup> that reported moderate short-term benefits of aquatic exercise on function | Moderate        |            |              |              |               |
|                           | Romeo (2013) [SR] <sup>32</sup>       |                                                                                                                                                                                                                                                                                                                              | 1 study reporting no improvement in function                                                                              | Moderate        |            |              |              |               |

Alloc. Conc. = allocation concealment, AMSTAR2 = Assessing the Methodological Quality of Systematic Reviews, Blind. Asses. = Blinded assessors, Blind. Part. = blinded participants, CI = confidence interval, H/UC = high / unclear risk of bias, L = low risk of bias, MA = meta-analysis, OA = osteoarthritis, Rand. Seq. = random sequence generation, RCT = randomised controlled trial, SD = standard deviation, SMD = standardised mean difference, SR = systematic review

Table –Aquatic exercise (OA) cont., results and quality assessment

| Outcome (outcome measure) | Study (date) [study type]           | Standardised result, SMD (95% CI) unless otherwise stated                       | Natural result                                                                                                       | AMSTAR2 quality | Rand. Seq. | Alloc. Conc. | Blind. Part. | Blind. Asses. |
|---------------------------|-------------------------------------|---------------------------------------------------------------------------------|----------------------------------------------------------------------------------------------------------------------|-----------------|------------|--------------|--------------|---------------|
| QoL                       | Bartels (2016) [MA] <sup>28</sup>   | <u>Aquatic exercise vs no exercise</u><br>SMD -0.25 (-0.47, -0.01)              |                                                                                                                      | High            |            |              |              |               |
|                           | Waller (2014) [MA] <sup>30</sup>    | <u>Aquatic exercise vs no exercise</u><br>Self-report: SMD -0.24 (-0.45, -0.04) |                                                                                                                      | Moderate        |            |              |              |               |
|                           | Lu (2015) [MA] <sup>29</sup>        | <u>Aquatic exercise vs no exercise</u><br>SMD -0.21 (-0.59, 0.18)               |                                                                                                                      | Moderate        |            |              |              |               |
|                           | McAlindon (2014) [SR] <sup>31</sup> |                                                                                 | Identified one systematic review <sup>33</sup> that reported moderate short-term benefits of aquatic exercise on QoL | Moderate        |            |              |              |               |
| Stiffness                 | Waller (2014) [MA] <sup>30</sup>    | <u>Aquatic exercise vs no exercise</u><br>Self-report: SMD -0.20 (-0.36, -0.03) |                                                                                                                      | Moderate        |            |              |              |               |

Alloc. Conc. = allocation concealment, AMSTAR2 = Assessing the Methodological Quality of Systematic Reviews, Blind. Asses. = Blinded assessors, Blind. Part. = blinded participants, CI = confidence interval, H/UC = high / unclear risk of bias, L = low risk of bias, MA = meta-analysis, OA= osteoarthritis, QoL = Quality of life, Rand. Seq. = random sequence generation, RCT = randomised controlled trial, SD = standard deviation, SMD = standardised mean difference

## Supplementary table 10 – Description of reviews of guidelines regarding exercise in OA

Table –Guidelines (OA), description of reviews

| Authors (date)                 | Review type | Study type included         | Type of OA      | Exposure detail        | Number of studies included | Funders                                                   |
|--------------------------------|-------------|-----------------------------|-----------------|------------------------|----------------------------|-----------------------------------------------------------|
| Gay (2016) <sup>34</sup>       | SR          | Guidelines                  | Knee, hip       | Guidelines on exercise | 8                          | <b>Industry</b> (Innovatherm)                             |
| Nelson (2014) <sup>35</sup>    | SR          | Guidelines                  | Knee, hip, hand | Guidelines on exercise | 15                         | <b>Professional body</b> (U.S. Bone and Joint Initiative) |
| Fernandes (2013) <sup>36</sup> | SR          | RCTs, Observational studies | Knee, hip       | Exercise studies       | 95                         | <b>Professional body</b> (EULAR)                          |

EULAR = European League Against Rheumatism, MA = meta-analysis, OA = osteoarthritis, RCT = randomised controlled trial, SR = systematic review, US = United States of America



## Supplementary table 11 – Results from guidelines regarding exercise in OA

Table – Guidelines (OA), results and quality assessment

| Outcome (outcome measure) | Study (date) [study type]           | Standardised result, SMD (95% CI) unless otherwise stated | Natural result                                                                                                                | AMSTAR2 quality | Rand. Seq. | Alloc. Conc. | Blind. Part. | Blind. Asses. |
|---------------------------|-------------------------------------|-----------------------------------------------------------|-------------------------------------------------------------------------------------------------------------------------------|-----------------|------------|--------------|--------------|---------------|
| Pain                      | Gay (2016) [SR] <sup>34</sup>       |                                                           | Exercise is a pillar of non-pharmacological OA treatment and leads to better pain and QoL – evidence graded A (i.e. “strong”) | Moderate        |            |              |              |               |
|                           | Fernandes (2013) [SR] <sup>36</sup> |                                                           | Recommended patients with OA should have a regular, individualised exercise regime to improve pain                            | Critically low§ |            |              |              |               |
| Function                  | Fernandes (2013) [SR] <sup>36</sup> |                                                           | Recommended patients with OA should have a regular, individualised exercise regime to improve function                        | Critically low§ |            |              |              |               |
| QoL                       | Gay (2016) [SR] <sup>34</sup>       |                                                           | Exercise is a pillar of non-pharmacological OA treatment and leads to better pain and QoL – evidence graded A (i.e. “strong”) | Moderate        |            |              |              |               |
| Overall health            | Nelson (2014) [SR] <sup>35</sup>    |                                                           | 12/15 guidelines strongly recommended exercise for knee and hip OA, less agreement regarding hand OA                          | Moderate        |            |              |              |               |

§ Recommendations paper and so there is little information on the systematic review that was carried out to support the recommendations.

Alloc. Conc. = allocation concealment, AMSTAR2 = Assessing the Methodological Quality of Systematic Reviews, Blind. Asses. = Blinded assessors, Blind. Part. = blinded participants, CI = confidence interval, H/UC = high / unclear risk of bias, L = low risk of bias, OA= osteoarthritis, QoL = Quality of life, Rand. Seq. = random sequence generation, RCT = randomised controlled trial, SD = standard deviation, SMD = standardised mean difference, SR = systematic review

## Supplementary table 12 – Description of reviews of studies comparing high and low intensity exercise in OA

Table –High vs low intensity (OA), description of reviews

| Authors (date)                | Review type | Study type included | Type of OA | Exposure detail                                     | Number of studies included | Funders                                                                                                                                                                 |
|-------------------------------|-------------|---------------------|------------|-----------------------------------------------------|----------------------------|-------------------------------------------------------------------------------------------------------------------------------------------------------------------------|
| Regnaud (2015) <sup>37</sup>  | MA          | RCTs                | Knee, hip  | Comparisons between high and low intensity exercise | 6                          | <b>University</b> (EHESP – French School of Public Health, Centre de recherche Epidémiologies et Biostatistique, INSERM U1153),<br><b>Hospital</b> (Hôpital Hôtel-Dieu) |
| de Rooij (2016) <sup>38</sup> | SR          | Cohort studies      | Hip        | Levels of exercise intensity                        | 1                          | <b>Professional body</b> (Royal Dutch Society for Physical Therapy)                                                                                                     |

MA = meta-analysis, OA = osteoarthritis, RCT = randomised controlled trial, SR = systematic review

## Supplementary table 13 – Results from reviews of studies comparing high and low intensity exercise in OA

Table –High vs low intensity (OA), results and quality assessment

| Outcome (outcome measure) | Study (date) [study type]          | Standardised result, SMD (95% CI) unless otherwise stated | Natural result                                                                                                                                                  | AMSTAR2 quality | Rand. Seq. | Alloc. Conc. | Blind. Part. | Blind. Asses. |
|---------------------------|------------------------------------|-----------------------------------------------------------|-----------------------------------------------------------------------------------------------------------------------------------------------------------------|-----------------|------------|--------------|--------------|---------------|
| Pain                      | Regnaux (2015) [MA] <sup>37</sup>  |                                                           | <u>WOMAC pain at study completion, high vs low intensity</u><br>Meta-MD: -0.84 (-1.63, -0.04)                                                                   | High            |            |              |              |               |
| Function                  | Regnaux (2015) [MA] <sup>37</sup>  |                                                           | <u>WOMAC pain at study completion, high vs low intensity</u><br>Meta-MD: -2.65 (-5.29, -0.01)                                                                   | High            |            |              |              |               |
|                           | de Rooij (2016) [SR] <sup>38</sup> |                                                           | One observational study reported that no supervised exercise and lower levels of physical exercise were associated with a deterioration of physical functioning | Moderate        |            |              |              |               |

Alloc. Conc. = allocation concealment, AMSTAR2 = Assessing the Methodological Quality of Systematic Reviews, Blind. Asses. = Blinded assessors, Blind. Part. = blinded participants, CI = confidence interval, H/UC = high / unclear risk of bias, L = low risk of bias, MA = meta-analysis, MD = mean difference, OA= osteoarthritis, Rand. Seq. = random sequence generation, RCT = randomised controlled trial, SD = standard deviation, SMD = standardised mean difference, SR = systematic review, WOMAC = Western Ontario and McMaster Universities Osteoarthritis Index

## Supplementary table 14 – Description of reviews of studies of home exercise in OA

*Table – Home exercise (OA), description of reviews*

| Authors (date)             | Review type | Study type included | Type of OA | Exposure detail                                    | Number of studies included | Funders                                  |
|----------------------------|-------------|---------------------|------------|----------------------------------------------------|----------------------------|------------------------------------------|
| Anwer (2016) <sup>39</sup> | MA          | RCTs, CC            | Knee       | Home exercise vs no exercise / supervised exercise | 16                         | <b>University</b> (King Saud University) |

CC = case-control studies, MA = meta-analysis, OA = osteoarthritis, RCT = randomised controlled trial, SR = systematic review

## Supplementary table 15 – Results from reviews of studies of home exercise in OA

Table – Home exercise (OA), results and quality assessment

| Outcome (outcome measure) | Study (date) [study type]       | Standardised result, SMD (95% CI) unless otherwise stated                                                                                        | Natural result | AMSTAR2 quality | Rand. Seq. | Alloc. Conc. | Blind. Part. | Blind. Asses. |
|---------------------------|---------------------------------|--------------------------------------------------------------------------------------------------------------------------------------------------|----------------|-----------------|------------|--------------|--------------|---------------|
| Pain                      | Anwer (2016) [MA] <sup>39</sup> | <u>Home exercise vs no exercise</u><br>SMD -0.46 (-0.68, -0.24)<br><u>Home exercise vs other exercise intervention</u><br>SMD 0.23 (-0.02, 0.43) |                | Low             |            |              |              |               |
| Function                  | Anwer (2016) [MA] <sup>39</sup> | <u>Home exercise vs no exercise</u><br>SMD -0.35 (-0.56, -0.15)<br><u>Home exercise vs other exercise intervention</u><br>SMD 0.37 (0.17, 0.57)  |                | Low             |            |              |              |               |

Alloc. Conc. = allocation concealment, AMSTAR2 = Assessing the Methodological Quality of Systematic Reviews, Blind. Asses. = Blinded assessors, Blind. Part. = blinded participants, CI = confidence interval, H/UC = high / unclear risk of bias, L = low risk of bias, MA = meta-analysis, OA= osteoarthritis, Rand. Seq. = random sequence generation, SMD = standardised mean difference

## Supplementary table 16 – Description of reviews of studies of land-based exercise in OA

Table – Land-based exercise (OA), description of reviews

| Authors (date)                     | Review type | Study type included | Type of OA | Exposure detail                                            | Number of studies included | Funders                                                                                |
|------------------------------------|-------------|---------------------|------------|------------------------------------------------------------|----------------------------|----------------------------------------------------------------------------------------|
| Moseng (2017) <sup>40</sup>        | MA          | RCTs                | Hip        | Compliance to ACSM recommendations                         | 12                         | <b>Professional body</b> (Norwegian Fund for Postgraduate Training in Physiotherapy)   |
| Fernandopulle (2017) <sup>41</sup> | MA          | RCTs                | Knee, hip  | Walking, recreational activities                           | 14                         | <b>University</b> (School of Physiotherapy Research Support Fund, University of Otago) |
| Beumer (2016) <sup>27</sup>        | MA          | RCTs                | Hip        | Land based exercise                                        | 6                          | <b>Not reported</b> – authors declare no conflicts of interest                         |
| Henriksen (2016) <sup>42</sup>     | MA          | RCTs                | Knee       | Land based exercise – studies included in Cochrane reviews | 34                         | <b>Charity</b> (Oak Foundation)                                                        |
| Fransen (2015) <sup>43</sup>       | MA          | RCTs                | Knee       | Land based exercise                                        | 44                         | <b>Government</b> (National Health and Medical Research Council, Australia)            |
| McAlindon (2014) <sup>31</sup>     | SR          | MA, SRs, RCTs       | Knee       | Land based exercises                                       | 4                          | <b>Professional body</b> (OARSI)                                                       |
| Romeo (2013) <sup>32</sup>         | SR          | RCTs                | Hip        | Land-based exercise studies published 2007-12              | 3                          | <b>Not reported</b>                                                                    |

ACSM = American College of Sports Medicine, MA = meta-analysis, OA = osteoarthritis, OARSI = Osteoarthritis Reserch Society International, RCT = randomised controlled trial, SR = systematic review

## Supplementary table 17 – Results from reviews of studies of land-based exercise in OA

Table – Land-based exercise (OA), results and quality assessment

| Outcome (outcome measure) | Study (date) [study type]               | Standardised result, SMD (95% CI) unless otherwise stated                                                                                                                                                                                     | Natural result                                                                                                                                       | AMSTAR2 quality | Rand. Seq. | Alloc. Conc. | Blind. Part. | Blind. Asses. |
|---------------------------|-----------------------------------------|-----------------------------------------------------------------------------------------------------------------------------------------------------------------------------------------------------------------------------------------------|------------------------------------------------------------------------------------------------------------------------------------------------------|-----------------|------------|--------------|--------------|---------------|
| Pain                      | Moseng (2017) [MA] <sup>40</sup>        | <u>Exercise vs no exercise</u><br>SMD -0.24 (-0.42, -0.06)<br><u>Exercise with high compliance to ACSM vs no exercise</u><br>SMD -0.42 (-0.58, -0.26)<br><u>Exercise with low compliance to ACSM vs no exercise</u><br>SMD 0.04 (-0.24, 0.31) |                                                                                                                                                      | Moderate        |            |              |              |               |
|                           | Fernandopulle (2017) [MA] <sup>41</sup> | <u>Walking vs control</u><br>3 months: 0.19 (-0.31, 0.68)<br>6 months: -1.55 (-3.62, 0.52)                                                                                                                                                    |                                                                                                                                                      | Low             |            |              |              |               |
|                           | Beumer (2016) [MA] <sup>27</sup>        | <u>Exercise vs minimal control</u><br>≤3 months: -0.40 (-1.06, 0.25)<br>4-12 months: -0.23 (-0.48, 0.03)<br>>12 months: -0.22 (-0.51, 0.06)                                                                                                   |                                                                                                                                                      | Moderate        |            |              |              |               |
|                           | Henriksen (2016) [MA] <sup>42</sup>     | <u>Exercise vs sham, placebo or no intervention</u><br>SMD -0.46 (-0.59, -0.34)                                                                                                                                                               |                                                                                                                                                      | Low             |            |              |              |               |
|                           | Fransen (2015) [MA] <sup>43</sup>       | <u>Exercise vs no exercise controls</u><br>SMD -0.49 (-0.59, -0.39)                                                                                                                                                                           |                                                                                                                                                      | Moderate        |            |              |              |               |
|                           | McAlindon (2014) [SR] <sup>31</sup>     |                                                                                                                                                                                                                                               | 4 MAs found small but clinically meaningful benefits of land-based exercise for pain – SMDs ranged from -0.34 (-0.19, -0.49) to -0.63 (-0.87, -0.39) | Moderate        |            |              |              |               |
|                           | Romeo (2013) [SR] <sup>32</sup>         |                                                                                                                                                                                                                                               | 3 studies reported no evidence for effectiveness for pain. Controls were a mixture of usual care and other exercise types.                           | Moderate        |            |              |              |               |

ACSM = American College of Sports Medicine, Alloc. Conc. = allocation concealment, AMSTAR2 = Assessing the Methodological Quality of Systematic Reviews, Blind. Asses. = Blinded assessors, Blind. Part. = blinded participants, CI = confidence interval, H/UC = high / unclear risk of bias, L = low risk of bias, MA = meta-analysis, OA = osteoarthritis, Rand. Seq. = random sequence generation, RCT = randomised controlled trial, SMD = standardised mean difference, SR = systematic review

Table – Land-based exercise (OA) cont., results and quality assessment

| Outcome (outcome measure) | Study (date) [study type]               | Standardised result, SMD (95% CI) unless otherwise stated                                                                                                                                                                                      | Natural result                                                                                                                                                                                                                                                                                    | AMSTAR2 quality | Rand. Seq. | Alloc. Conc. | Blind. Part. | Blind. Asses. |
|---------------------------|-----------------------------------------|------------------------------------------------------------------------------------------------------------------------------------------------------------------------------------------------------------------------------------------------|---------------------------------------------------------------------------------------------------------------------------------------------------------------------------------------------------------------------------------------------------------------------------------------------------|-----------------|------------|--------------|--------------|---------------|
| Function                  | Moseng (2017) [MA] <sup>40</sup>        | <u>Exercise vs no exercise</u><br>SMD -0.34 (-0.50, -0.18)<br><u>Exercise with high compliance to ACSM vs no exercise</u><br>SMD -0.41 (-0.58, -0.24)<br><u>Exercise with low compliance to ACSM vs no exercise</u><br>SMD -0.23 (-0.52, 0.06) |                                                                                                                                                                                                                                                                                                   | Moderate        |            |              |              |               |
|                           | Fernandopulle (2017) [MA] <sup>41</sup> |                                                                                                                                                                                                                                                | <u>Walking vs control, mean difference (95% CI)</u><br>6 months: -10.38 (-12.27, -8.48)<br><u>Recreational activities vs control, WOMAC mean difference (95% CI)</u><br>-9.56 (-13.95, -5.17)<br><u>Conditioning exercises vs control, WOMAC mean difference (95% CI)</u><br>-3.74 (-5.70, -1.78) | Low             |            |              |              |               |
|                           | Fransen (2015) [MA] <sup>43</sup>       | <u>Exercise vs no exercise controls</u><br>SMD -0.52 (-0.64, -0.39)                                                                                                                                                                            |                                                                                                                                                                                                                                                                                                   | Moderate        |            |              |              |               |
|                           | McAlindon (2014) [SR] <sup>31</sup>     |                                                                                                                                                                                                                                                | 4 MAs found small but clinically meaningful benefits of land-based exercise for function – SMD 0.25 (0.03, 0.48)                                                                                                                                                                                  | Moderate        |            |              |              |               |
|                           | Romeo (2013) [SR] <sup>32</sup>         |                                                                                                                                                                                                                                                | 3 studies reported positive results for physical function. Controls were a mixture of usual care and other exercise types.                                                                                                                                                                        | Moderate        |            |              |              |               |
| QoL                       | Fransen (2015) [MA] <sup>43</sup>       | <u>Exercise vs no exercise controls</u><br>SMD 0.28 (0.15, 0.40)                                                                                                                                                                               |                                                                                                                                                                                                                                                                                                   | Moderate        |            |              |              |               |

ACSM = American College of Sports Medicine, Alloc. Conc. = allocation concealment, AMSTAR2 = Assessing the Methodological Quality of Systematic Reviews, Blind. Asses. = Blinded assessors, Blind. Part. = blinded participants, CI = confidence interval, H/UC = high / unclear risk of bias, L = low risk of bias, MA = meta-analysis, OA = osteoarthritis, QoL = Quality of Life, Rand. Seq. = random sequence generation, RCT = randomised controlled trial, SMD = standardised mean difference, SR = systematic review, WOMAC = Western Ontario and McMaster Universities Osteoarthritis Index



## Supplementary table 18 – Description of reviews of studies of multidisciplinary exercise interventions in OA

Table – Multidisciplinary interventions (OA), description of reviews

| Authors (date)                 | Review type | Study type included | Type of OA | Exposure detail                 | Number of studies included | Funders                                                                                           |
|--------------------------------|-------------|---------------------|------------|---------------------------------|----------------------------|---------------------------------------------------------------------------------------------------|
| Aebischer (2016) <sup>44</sup> | MA          | RCTs, observational | Hand       | Exercise therapy                | 10                         | <b>Professional body</b> (Swiss Society for Hand Rehabilitation, Swiss Physiotherapy Association) |
| Finney (2016) <sup>45</sup>    | SR          | RCTs                | ≥2 joints  | Multidisciplinary interventions | 4                          | <b>Government</b> (National Institute for Health Research)                                        |

BMI = body mass index, MA = meta-analysis, OA = osteoarthritis, RCT = randomised controlled trial, SR = systematic review

## Supplementary table 19 – Results from reviews of studies of multidisciplinary exercise interventions in OA

Table – Multidisciplinary interventions (OA), results and quality assessment

| Outcome (outcome measure) | Study (date) [study type]           | Standardised result, SMD (95% CI) unless otherwise stated      | Natural result                                                                                                                                                | AMSTAR2 quality | Rand. Seq. | Alloc. Conc. | Blind. Part. | Blind. Asses. |
|---------------------------|-------------------------------------|----------------------------------------------------------------|---------------------------------------------------------------------------------------------------------------------------------------------------------------|-----------------|------------|--------------|--------------|---------------|
| Pain                      | Aebischer (2016) [MA] <sup>44</sup> | <u>Exercise therapy vs control</u><br>SMD -3.16 (-5.56, -0.75) |                                                                                                                                                               | Moderate        |            |              |              |               |
|                           | Finney (2016) [SR] <sup>45</sup>    |                                                                | <u>Education + exercise interventions vs single discipline interventions, no interventions or usual care</u><br>3/4 studies reported improvements in pain     | Moderate        |            |              |              |               |
| Function                  | Aebischer (2016) [MA] <sup>44</sup> | <u>Exercise therapy vs control</u><br>SMD -0.66 (-1.55, 0.23)  |                                                                                                                                                               | Moderate        |            |              |              |               |
|                           | Finney (2016) [SR] <sup>45</sup>    |                                                                | <u>Education + exercise interventions vs single discipline interventions, no interventions or usual care</u><br>0/3 studies reported improvements in function | Moderate        |            |              |              |               |
| QoL                       | Finney (2016) [SR] <sup>45</sup>    |                                                                | <u>Education + exercise interventions vs single discipline interventions, no interventions or usual care</u><br>3/4 studies reported improvements in QoL      | Moderate        |            |              |              |               |

Alloc. Conc. = allocation concealment, AMSTAR2 = Assessing the Methodological Quality of Systematic Reviews, Blind. Asses. = Blinded assessors, Blind. Part. = blinded participants, CI = confidence interval, H/UC = high / unclear risk of bias, L = low risk of bias, OA= osteoarthritis, QoL = Quality of life, Rand. Seq. = random sequence generation, RCT = randomised controlled trial, SMD = standardised mean difference, SR = systematic review

## Supplementary table 20 – Description of reviews of studies of muscle strengthening exercise in OA

Table – Muscle strengthening exercise (OA), description of reviews

| Authors (date)                 | Review type | Study type included | Type of OA | Exposure detail                                  | Number of studies included | Funders                                                                                                   |
|--------------------------------|-------------|---------------------|------------|--------------------------------------------------|----------------------------|-----------------------------------------------------------------------------------------------------------|
| Bartholdy (2017) <sup>46</sup> | MA          | RCTs                | Knee       | ACSM muscle strengthening exercise interventions | 45                         | <b>Charity</b> (Oak Foundation)                                                                           |
| Magni (2017) <sup>47</sup>     | MA          | RCTs                | Hand       | Muscle strengthening training                    | 5                          | <b>No funding</b>                                                                                         |
| Osteras (2017) <sup>48</sup>   | MA          | RCTs                | Hand       | Muscle strengthening exercises / stretching      | 7                          | <b>Professional body</b> (Norwegian Fund for Postgraduate Training in Physiotherapy)                      |
| Coudeyre (2016) <sup>49</sup>  | MA          | RCTs                | Knee       | Isokinetic muscle strengthening                  | 9                          | <b>No funding</b>                                                                                         |
| Li (2016) <sup>50</sup>        | MA          | RCTs                | Knee       | Muscle strengthening exercises                   | 17                         | <b>Government</b> (State Administration of Traditional Chinese Medicine)                                  |
| Juhl (2014) <sup>14</sup>      | MA          | RCTs                | Knee       | Muscle strengthening exercise                    | 32                         | <b>Charity</b> (Health Insurance Foundation), <b>Professional body</b> (Danish Physiotherapy Association) |
| Corbett (2013) <sup>15</sup>   | MA          | RCTs                | Knee       | Muscle strengthening exercise                    | 114 §                      | <b>Government</b> (National Institute for Health Research [NIHR])                                         |
| Tanaka (2013) <sup>16</sup>    | MA          | RCTs                | Knee       | Muscle strengthening exercise                    | 7                          | <b>No funding</b>                                                                                         |
| Uthman (2013) <sup>17</sup>    | MA          | RCTs                | Knee, hip  | Muscle strengthening exercise                    | 60 §                       | <b>Government</b> (National Institute for Health Research [NIHR])                                         |
| Wijnen (2018) <sup>19</sup>    | SR          | RCTs                | Hip        | Muscle strengthening exercises following surgery | 7                          | <b>No funding</b>                                                                                         |
| Brosseau (2017) <sup>51</sup>  | SR          | RCTs                | Knee       | Muscle strengthening exercises                   | 26                         | <b>University</b> (University of Ottawa Research Chair)                                                   |
| Brosseau (2016) <sup>52</sup>  | SR          | RCTs                | Hip        | Muscle strengthening exercises                   | 2                          | <b>University</b> (University of Ottawa Research Chair)                                                   |
| McAlindon (2014) <sup>31</sup> | SR          | MA, SR, RCTs        | Knee       | Muscle strengthening training                    | 2                          | <b>Professional body</b> (OARSI)                                                                          |

§ Network meta-analysis looking at a range of exposures

ACSM = American College of Sports Medicine, MA = meta-analysis, OA = osteoarthritis, OARSI = Osteoarthritis Research Society International, RCT = randomised controlled trial, SR = systematic review

## Supplementary table 21 – Results from reviews of studies of muscle strengthening exercise in OA

Table – Muscle strengthening exercise (OA) cont., results and quality assessment

| Outcome (outcome measure) | Study (date) [study type]           | Standardised result, SMD (95% CI) unless otherwise stated                                                                                                                 | Natural result                                                                                                                                        | AMSTAR2 quality | Rand. Seq. | Alloc. Conc. | Blind. Part. | Blind. Asses. |
|---------------------------|-------------------------------------|---------------------------------------------------------------------------------------------------------------------------------------------------------------------------|-------------------------------------------------------------------------------------------------------------------------------------------------------|-----------------|------------|--------------|--------------|---------------|
| Pain                      | Bartholdy (2017) [MA] <sup>46</sup> | <u>ACSM interventions vs other exercise interventions</u><br>SMD -0.11 (-0.45, 0.24)                                                                                      |                                                                                                                                                       | Moderate        |            |              |              |               |
|                           | Magni (2017) [MA] <sup>47</sup>     | <u>Exercise vs no exercise</u><br>SMD -0.23 (-0.42, -0.04)                                                                                                                |                                                                                                                                                       | Moderate        |            |              |              |               |
|                           | Osteras (2017) [MA] <sup>48</sup>   | <u>Exercise vs no exercise</u><br>Post-treatment: SMD -0.27 (-0.47, -0.07)<br>Medium/long term: SMD 0.09 (-0.18, 0.35)                                                    |                                                                                                                                                       | Moderate        |            |              |              |               |
|                           | Coudeyre (2016) [MA] <sup>49</sup>  | <u>Isokinetic muscle strengthening vs no exercise</u><br>SMD -1.19 (-1.67, -0.70)<br><u>Isokinetic muscle strengthening vs other exercise</u><br>SMD -1.24 (-1.67, -0.81) |                                                                                                                                                       | Low             |            |              |              |               |
|                           | Li (2016) [MA] <sup>50</sup>        | <u>Exercise vs no exercise</u><br>SMD -0.43 (-0.57, -0.29)                                                                                                                |                                                                                                                                                       | Moderate        |            |              |              |               |
|                           | Juhl (2014) [MA] <sup>14</sup>      | <u>Exercise vs no exercise</u><br>SMD -0.62 (-0.79, -0.45)                                                                                                                |                                                                                                                                                       | Moderate        |            |              |              |               |
|                           | Corbett (2013) [MA] <sup>15</sup>   | <u>Exercise vs no exercise</u><br>SMD -0.40 (-0.61, -0.19)                                                                                                                |                                                                                                                                                       | Moderate        |            |              |              |               |
|                           | Tanaka (2013) [MA] <sup>16</sup>    | <u>Exercise vs no exercise</u><br>Non-weight bearing: SMD -1.42 (-2.09, -0.75)<br>Weight bearing: SMD -0.70 (-1.05, -0.35)                                                |                                                                                                                                                       | Moderate        |            |              |              |               |
|                           | Uthman (2013) [MA] <sup>17</sup>    | <u>Exercise vs no exercise</u><br>SMD -0.81 (-1.13, -0.50)                                                                                                                |                                                                                                                                                       | Moderate        |            |              |              |               |
|                           | Brosseau (2017) [SR] <sup>51</sup>  |                                                                                                                                                                           | 14/16 studies of strengthening programs reported clinical and significant improvements in pain.                                                       | Moderate        |            |              |              |               |
|                           | Brosseau (2016) [SR] <sup>52</sup>  |                                                                                                                                                                           | 2 studies included, both showed clinical improvement, 1 showed statistically significant improvement [control = non-exercise activity / waiting list] | Moderate        |            |              |              |               |
|                           | McAlindon (2014) [SR] <sup>31</sup> |                                                                                                                                                                           | 2011 MA and SR demonstrated moderate effect size for reducing pain. Pain SMD -0.38 (-0.54, -0.23)                                                     | Moderate        |            |              |              |               |

ACSM = American College of Sports Medicine, Alloc. Conc. = allocation concealment, AMSTAR2 = Assessing the Methodological Quality of Systematic Reviews, Blind. Asses. = Blinded assessors, Blind. Part. = blinded participants, CI = confidence interval, H/UC = high / unclear risk of bias, L = low risk of bias, MA = meta-analysis, OA = osteoarthritis, Rand. Seq. = random sequence generation, SMD = standardised mean difference, SR = systematic review

Table – Muscle strengthening exercise (OA) cont., results and quality assessment

| Outcome (outcome measure) | Study (date) [study type]           | Standardised result, SMD (95% CI) unless otherwise stated                                                              | Natural result                                                                                                                                                                                                             | AMSTAR2 quality | Rand. Seq. | Alloc. Conc. | Blind. Part. | Blind. Asses. |
|---------------------------|-------------------------------------|------------------------------------------------------------------------------------------------------------------------|----------------------------------------------------------------------------------------------------------------------------------------------------------------------------------------------------------------------------|-----------------|------------|--------------|--------------|---------------|
| Function                  | Bartholdy (2017) [MA] <sup>46</sup> | <u>ACSM interventions vs other exercise interventions</u><br>SMD -0.15 (-0.55, 0.24)                                   |                                                                                                                                                                                                                            | Moderate        |            |              |              |               |
|                           | Magni (2017) [MA] <sup>47</sup>     | <u>Exercise vs no exercise</u><br>SMD -0.10 (-0.33, 0.13)                                                              |                                                                                                                                                                                                                            | Moderate        |            |              |              |               |
|                           | Osteras (2017) [MA] <sup>48</sup>   | <u>Exercise vs no exercise</u><br>Post-treatment: SMD -0.28 (-0.58, 0.02)<br>Medium/long term: SMD -0.05 (-0.31, 0.21) |                                                                                                                                                                                                                            | Moderate        |            |              |              |               |
|                           | Coudeyre (2016) [MA] <sup>49</sup>  | <u>Isokinetic muscle strengthening vs other exercise</u><br>SMD -0.58 (-1.11, -0.04)                                   |                                                                                                                                                                                                                            | Low             |            |              |              |               |
|                           | Li (2016) [MA] <sup>50</sup>        | <u>Exercise vs no exercise</u><br>SMD -0.53 (-0.70, -0.37)                                                             |                                                                                                                                                                                                                            | Moderate        |            |              |              |               |
|                           | Juhl (2014) [MA] <sup>14</sup>      | <u>Exercise vs no exercise</u><br>SMD -0.60 (-0.83, -0.37)                                                             |                                                                                                                                                                                                                            | Moderate        |            |              |              |               |
|                           | Uthman (2013) [MA] <sup>17</sup>    | <u>Exercise vs no exercise</u><br>SMD -0.37 (-0.84, 0.09)                                                              |                                                                                                                                                                                                                            | Moderate        |            |              |              |               |
|                           | Wijnen (2018) [SR] <sup>19</sup>    |                                                                                                                        | 4/7 studies reported significant improvements in joint function. 3/5 reported significant improvements in function performance [predominantly usual care as control; some studies had another type of exercise as control] | Moderate        |            |              |              |               |
|                           | Brosseau (2017) [SR] <sup>51</sup>  |                                                                                                                        | 12/12 studies of strengthening programs reported clinical and significant improvements in function                                                                                                                         | Moderate        |            |              |              |               |
|                           | McAlindon (2014) [SR] <sup>31</sup> |                                                                                                                        | 2011 MA and SR demonstrated moderate effect size for improving function. Function SMD -0.41 (-0.66, -0.17)                                                                                                                 | Moderate        |            |              |              |               |
| QoL                       | Osteras (2017) [MA] <sup>48</sup>   |                                                                                                                        | <u>SF12 at 12 months, mean difference (95% CI)</u><br>MD 0.30 (-3.72, 4.32)                                                                                                                                                | Moderate        |            |              |              |               |
|                           | Brosseau (2017) [SR] <sup>51</sup>  |                                                                                                                        | 3/3 studies of strengthening programs reported clinical and significant improvements in function                                                                                                                           | Moderate        |            |              |              |               |
| Grip strength             | Magni (2017) [MA] <sup>47</sup>     |                                                                                                                        | <u>Grip strength, MD (95% CI)</u><br>MD 1.35 (-0.84, 3.54)                                                                                                                                                                 | Moderate        |            |              |              |               |

ACSM = American College of Sports Medicine, Alloc. Conc. = allocation concealment, AMSTAR2 = Assessing the Methodological Quality of Systematic Reviews, Blind. Asses. = Blinded assessors, Blind. Part. = blinded participants, CI = confidence interval, H/UC = high / unclear risk of bias, L = low risk of bias, MA = meta-analysis, MD = mean difference, OA = osteoarthritis, QoL = quality of life, Rand. Seq. = random sequence generation, SMD = standardised mean difference, SR = systematic review

## Supplementary table 22 – Description of reviews of studies of exercise therapy interventions in OA

Table – Physiotherapy / exercise therapy (OA), description of reviews

| Authors (date)                 | Review type | Study type included | Type of OA | Exposure detail                        | Number of studies included | Funders                                                                                           |
|--------------------------------|-------------|---------------------|------------|----------------------------------------|----------------------------|---------------------------------------------------------------------------------------------------|
| Briani (2018) <sup>53</sup>    | MA          | RCTs                | Knee       | Exercise therapy                       | 23                         | <b>No funding</b>                                                                                 |
| Hurley (2018) <sup>54</sup>    | MA          | RCTs                | Knee, hip  | Exercise therapy                       | 21                         | <b>Charity</b> (Arthritis Research UK)                                                            |
| Aebischer (2016) <sup>44</sup> | MA          | RCTs, observational | Hand       | Exercise therapy                       | 10                         | <b>Professional body</b> (Swiss Society for Hand Rehabilitation, Swiss Physiotherapy Association) |
| Sampath (2016) <sup>55</sup>   | MA          | RCTs                | Hip        | Exercise therapy                       | 7                          | <b>No funding</b>                                                                                 |
| Bertozzi (2015) <sup>56</sup>  | MA          | RCTs                | Hand       | Exercise therapy                       | 13                         | <b>No funding</b>                                                                                 |
| Desveaux (2014) <sup>57</sup>  | MA          | RCTs                | Unreported | Community based exercise interventions | 4                          | <b>Not reported</b> – authors declare no conflicts of interest                                    |
| Brosseau (2016) <sup>52</sup>  | SR          | RCTs                | Hip        | Therapeutic exercise                   | 4                          | <b>University</b> (University of Ottawa research chair)                                           |
| Ferreira (2015) <sup>58</sup>  | SR          | RCT                 | Knee       | Exercise therapy                       | 3                          | <b>Not reported</b>                                                                               |
| Fehring (2013) <sup>59</sup>   | SR          | Reviews, RCTs       | Knee       | Physical therapy [advanced stage OA]   | 3                          | <b>Not reported</b> – authors declare no conflicts of interest                                    |

MA = meta-analysis, OA = osteoarthritis, RCT = randomised controlled trial, SR = systematic review

## Supplementary table 23 – Results from reviews of studies of exercise therapy interventions in OA

Table – Physiotherapy / exercise therapy (OA), results and quality assessment

| Outcome (outcome measure) | Study (date) [study type]          | Standardised result, SMD (95% CI) unless otherwise stated                                                             | Natural result                                                                                                                                          | AMSTAR2 quality | Rand. Seq. | Alloc. Conc. | Blind. Part. | Blind. Asses. |
|---------------------------|------------------------------------|-----------------------------------------------------------------------------------------------------------------------|---------------------------------------------------------------------------------------------------------------------------------------------------------|-----------------|------------|--------------|--------------|---------------|
| Pain                      | Hurley (2018) [MA] <sup>54</sup>   | <u>Exercise vs control</u><br>SMD -0.20 (-0.28, -0.11)                                                                |                                                                                                                                                         | High            |            |              |              |               |
|                           | Sampath (2016) [MA] <sup>55</sup>  | <u>Exercise therapy vs control</u><br>Post-treatment: SMD -0.27 (-0.50, -0.04)<br>Follow-up: SMD -0.24 (-0.41, -0.06) |                                                                                                                                                         | Moderate        |            |              |              |               |
|                           | Bertozzi (2015) [MA] <sup>56</sup> | <u>Exercise vs control</u><br>Short term: SMD -0.71 (-1.60, 0.19)<br>Long term: SMD -0.03 (-0.24, 0.18)               |                                                                                                                                                         | Moderate        |            |              |              |               |
|                           | Brosseau (2016) [SR] <sup>52</sup> |                                                                                                                       | 2/2 studies showed clinically important improvement in pain, 1 was statistically significant                                                            | Moderate        |            |              |              |               |
|                           | Ferreira (2015) [SR] <sup>58</sup> |                                                                                                                       | Those allocated to strengthening therapy group had benefits for pain                                                                                    | Moderate        |            |              |              |               |
|                           | Fehring (2013) [SR] <sup>59</sup>  |                                                                                                                       | 1/3 studies of advanced disease reported improvements in pain following exercise                                                                        | Critically low  |            |              |              |               |
| Function                  | Hurley (2018) [MA] <sup>54</sup>   | <u>Exercise vs control</u><br>SMD -0.27 (-0.37, -0.17)                                                                |                                                                                                                                                         | High            |            |              |              |               |
|                           | Sampath (2016) [MA] <sup>55</sup>  | <u>Exercise therapy vs control</u><br>Post-treatment: SMD -0.29 (-0.47, -0.11)<br>Follow-up: SMD -0.33 (-0.50, -0.15) |                                                                                                                                                         | Moderate        |            |              |              |               |
|                           | Bertozzi (2015) [MA] <sup>56</sup> | <u>Exercise vs control</u><br>Long term: SMD -0.07 (-0.28, 0.15)                                                      |                                                                                                                                                         | Moderate        |            |              |              |               |
|                           | Desveaux (2014) [MA] <sup>57</sup> |                                                                                                                       | <u>6MWT, intervention vs control</u><br>MD 41.65 (20.51, 62.79)<br><u>Standard function capacity, intervention, vs control</u><br>SMD 0.18 (0.05, 0.31) | Low             |            |              |              |               |
|                           | Brosseau (2016) [SR] <sup>52</sup> |                                                                                                                       | 2/2 studies showed clinically important and statistically significant improvement in function                                                           | Moderate        |            |              |              |               |
|                           | Ferreira (2015) [SR] <sup>58</sup> |                                                                                                                       | Those allocated to strengthening therapy group had benefits for function                                                                                | Moderate        |            |              |              |               |
| Depression                | Hurley (2018) [MA] <sup>54</sup>   | <u>Exercise vs control</u><br>SMD -0.16 (-0.29, -0.02)                                                                |                                                                                                                                                         | High            |            |              |              |               |
| Anxiety                   | Hurley (2018) [MA] <sup>54</sup>   | <u>Exercise vs control</u><br>SMD -0.11 (-0.26, 0.05)                                                                 |                                                                                                                                                         | High            |            |              |              |               |
| QoL                       | Briani (2018) [MA] <sup>53</sup>   | <u>Exercise therapy vs control</u><br>SMD 0.70 (0.20, 1.20)                                                           |                                                                                                                                                         | Moderate        |            |              |              |               |
|                           | Sampath (2016) [MA] <sup>55</sup>  | <u>Exercise therapy vs control</u><br>SMD -0.06 (-0.27, 0.16)                                                         |                                                                                                                                                         | Moderate        |            |              |              |               |
| Self-efficacy             | Hurley (2018) [MA] <sup>54</sup>   | <u>Exercise vs control</u><br>SMD 0.46 (0.34, 0.58)                                                                   |                                                                                                                                                         | High            |            |              |              |               |

Alloc. Conc. = allocation concealment, AMSTAR2 = Assessing the Methodological Quality of Systematic Reviews, Blind. Asses. = Blinded assessors, Blind. Part. = blinded participants, CI = confidence interval, H/UC = high / unclear risk of bias, L = low risk of bias, MA = meta-analysis, MD = mean difference, OA = osteoarthritis, QoL = quality of life, Rand. Seq. = random sequence generation, RCT = randomised controlled trial, SD = standard deviation, SMD = standardised mean difference, SR = systematic review

## Supplementary table 24 – Description of reviews of studies of Tai Chi in OA

Table – Tai-Chi (OA), description of reviews

| Authors (date)                | Review type | Study type included | Type of OA       | Exposure detail  | Number of studies included | Funders                                                                                                |
|-------------------------------|-------------|---------------------|------------------|------------------|----------------------------|--------------------------------------------------------------------------------------------------------|
| Zhang (2017) <sup>60</sup>    | MA          | RCTs                | Knee             | Tai-Chi          | 8                          | <b>Government</b> (State Administration of Traditional Chinese Medicine)                               |
| Chen (2016) <sup>61</sup>     | MA          | RCT                 | Knee, hip, spine | Tai-Chi          | 9                          | <b>University</b> (University of British Columbia), <b>Charity</b> (British Columbia Lung Association) |
| Corbett (2013) <sup>15</sup>  | MA          | RCTs                | Knee             | Aerobic exercise | 114 §                      | <b>Government</b> (National Institute for Health Research [NIHR])                                      |
| Yan (2013) <sup>62</sup>      | MA          | RCT                 | Any joint        | Tai-Chi          | 7                          | <b>No funding</b>                                                                                      |
| Brosseau (2017) <sup>63</sup> | SR          | RCTs                | Knee             | Tai-Chi          | 4                          | <b>University</b> (University of Ottawa Research Chair)                                                |

§ Network meta-analysis looking at a range of exposures

MA = meta-analysis, OA = osteoarthritis, RCT = randomised controlled trial, SR = systematic review



## Supplementary table 25 – Results from reviews of studies of Tai Chi in OA

Table – Tai-Chi (OA), results and quality assessment

| Outcome (outcome measure) | Study (date) [study type]          | Standardised result, SMD (95% CI) unless otherwise stated | Natural result                                                                                           | AMSTAR2 quality | Rand. Seq. | Alloc. Conc. | Blind. Part. | Blind. Asses. |
|---------------------------|------------------------------------|-----------------------------------------------------------|----------------------------------------------------------------------------------------------------------|-----------------|------------|--------------|--------------|---------------|
| Pain                      | Zhang (2017) [MA] <sup>60</sup>    | <u>Tai-Chi vs no exercise</u><br>SMD -0.77 (-1.13, -0.41) |                                                                                                          | Moderate        |            |              |              |               |
|                           | Chen (2016) [MA] <sup>61</sup>     | <u>Tai-Chi vs no exercise</u><br>SMD -0.53 (-0.75, -0.32) |                                                                                                          | Moderate        |            |              |              |               |
|                           | Corbett (2013) [MA] <sup>15</sup>  | <u>Tai-Chi vs no exercise</u><br>SMD -0.51 (-1.03, 0.01)  |                                                                                                          | Moderate        |            |              |              |               |
|                           | Yan (2013) [MA] <sup>62</sup>      | <u>Tai-Chi vs control</u><br>SMD -0.45 (-0.70, -0.20)     |                                                                                                          | Low             |            |              |              |               |
|                           | Brosseau (2017) [SR] <sup>63</sup> |                                                           | Qigong style = Clinical but not significant benefit;<br>Sun style = Clinical but not significant benefit | Moderate        |            |              |              |               |
| Function                  | Zhang (2017) [MA] <sup>60</sup>    | <u>Tai-Chi vs no exercise</u><br>SMD -0.75 (-0.98, -0.52) |                                                                                                          | Moderate        |            |              |              |               |
|                           | Chen (2016) [MA] <sup>61</sup>     | <u>Tai-Chi vs no exercise</u><br>SMD -0.70 (-0.93, -0.47) |                                                                                                          | Moderate        |            |              |              |               |
|                           | Yan (2013) [MA] <sup>62</sup>      | <u>Tai-Chi vs control</u><br>SMD -0.61 (-0.85, -0.37)     |                                                                                                          | Low             |            |              |              |               |
|                           | Brosseau (2017) [SR] <sup>63</sup> |                                                           | Qigong style = Clinical but not significant benefit;<br>Sun style = Clinical and significant benefit     | Moderate        |            |              |              |               |
| Stiffness                 | Zhang (2017) [MA] <sup>60</sup>    | <u>Tai-Chi vs no exercise</u><br>SMD -0.56 (-0.96, -0.16) |                                                                                                          | Moderate        |            |              |              |               |
|                           | Yan (2013) [MA] <sup>62</sup>      | <u>Tai-Chi vs control</u><br>SMD -0.31 (-0.60, -0.02)     |                                                                                                          | Low             |            |              |              |               |
| QoL                       | Zhang (2017) [MA] <sup>60</sup>    | <u>Tai-Chi vs no exercise</u><br>SMD 0.57 (0.17, 0.97)    |                                                                                                          | Moderate        |            |              |              |               |
|                           | Chen (2016) [MA] <sup>61</sup>     | <u>Tai-Chi vs no exercise</u><br>SMD 0.38 (0.75, 0.01)    |                                                                                                          | Moderate        |            |              |              |               |
|                           | Brosseau (2017) [SR] <sup>63</sup> |                                                           | Qigong style = Clinical and significant benefit;<br>Sun style = no benefit                               | Moderate        |            |              |              |               |

Alloc. Conc. = allocation concealment, AMSTAR2 = Assessing the Methodological Quality of Systematic Reviews, Blind. Asses. = Blinded assessors, Blind. Part. = blinded participants, CI = confidence interval, H/UC = high / unclear risk of bias, L = low risk of bias, MA = meta-analysis, OA= osteoarthritis, QoL = quality of life, Rand. Seq. = random sequence generation, RCT = randomised controlled trial, SMD = standardised mean difference, SR = systematic review

## Supplementary table 26 – Description of reviews of studies of yoga in OA

Table – Yoga (OA), description of reviews

| Authors (date)                | Review type | Study type included   | Type of OA      | Exposure detail | Number of studies included | Funders                                                          |
|-------------------------------|-------------|-----------------------|-----------------|-----------------|----------------------------|------------------------------------------------------------------|
| Wang (2018) <sup>64</sup>     | MA          | RCTs                  | Knee            | Yoga            | 5                          | <b>Government</b> (National Natural Science Foundation of China) |
| Brosseau (2017) <sup>63</sup> | SR          | RCTs                  | Knee            | Yoga            | 1                          | <b>University</b> (University of Ottawa Research Chair)          |
| Kan (2016) <sup>65</sup>      | SR          | RCTs, single arm int. | Knee            | Yoga            | 9                          | <b>Not reported</b> – Authors declare no conflict of interest    |
| Cramer (2013) <sup>66</sup>   | SR          | RCTs                  | Knee, hip, hand | Yoga            | 3                          | <b>Charity</b> (the Rut- and Klaus-Bahlsen-Foundation)           |

int. = intervention, MA = meta-analysis, OA = osteoarthritis, RCT = randomised controlled trial, SR = systematic review

## Supplementary table 27 – Results from reviews of studies of yoga in OA

Table –Yoga (OA), results and quality assessment

| Outcome (outcome measure) | Study (date) [study type]          | Standardised result, SMD (95% CI) unless otherwise stated | Natural result                                                                                               | AMSTAR2 quality | Rand. Seq. | Alloc. Conc. | Blind. Part. | Blind. Asses. |
|---------------------------|------------------------------------|-----------------------------------------------------------|--------------------------------------------------------------------------------------------------------------|-----------------|------------|--------------|--------------|---------------|
| Pain                      | Brosseau (2017) [SR] <sup>63</sup> |                                                           | Clinical and significant benefit                                                                             | Moderate        |            |              |              |               |
|                           | Kan (2016) [SR] <sup>65</sup>      |                                                           | 3/4 RCTs reported reductions in pain vs. exercise control, 2/2 before/after studies reported pain reductions | Moderate        |            |              |              |               |
|                           | Cramer (2013) [SR] <sup>66</sup>   |                                                           | 3 studies – very low evidence for the effect of yoga on pain                                                 | Moderate        |            |              |              |               |
| Function                  | Wang (2018) [MA] <sup>64</sup>     | <u>Yoga vs no exercise</u><br>SMD -1.83 (-2.09, -1.57)    |                                                                                                              | Moderate        |            |              |              |               |
|                           | Brosseau (2017) [SR] <sup>63</sup> |                                                           | Clinical but not significant benefit                                                                         | Moderate        |            |              |              |               |
|                           | Kan (2016) [SR] <sup>65</sup>      |                                                           | 1/2 studies reported improved function vs. exercise control                                                  | Moderate        |            |              |              |               |
|                           | Cramer (2013) [SR] <sup>66</sup>   |                                                           | 3 studies – very low evidence for the effect of yoga on function                                             | Moderate        |            |              |              |               |
| QoL                       | Kan (2016) [SR] <sup>65</sup>      |                                                           | 1/3 RCTs reported improvements in QoL vs. exercise control, 1 before/after study reported QoL improvement    | Moderate        |            |              |              |               |

Alloc. Conc. = allocation concealment, AMSTAR2 = Assessing the Methodological Quality of Systematic Reviews, Blind. Asses. = Blinded assessors, Blind. Part. = blinded participants, CI = confidence interval, H/UC = high / unclear risk of bias, L = low risk of bias, OA= osteoarthritis, QoL = quality of life, Rand. Seq. = random sequence generation, RCT = randomised controlled trial, SMD = standardised mean difference, SR = systematic review

## Supplementary table 28 – Description of reviews of studies of aerobic exercise in RA

Table – Aerobic exercise (RA), description of reviews

| Authors (date)                           | Review type | Study type included          | Exposure detail          | Number of studies included | Funders                                                                                                                                                                                                           |
|------------------------------------------|-------------|------------------------------|--------------------------|----------------------------|-------------------------------------------------------------------------------------------------------------------------------------------------------------------------------------------------------------------|
| Rongen-van Dartel (2015) <sup>67</sup>   | MA          | RCTs                         | Aerobic exercise         | 5                          | <b>Not reported</b>                                                                                                                                                                                               |
| Hernandez-Hernandez (2017) <sup>68</sup> | SR          | MA, RCTs, observational      | Aerobic exercise         | 15                         | <b>Government</b> (Spanish Ministry of Health, European Regional Development Fund), <b>Professional body</b> (Asociación para la Ayuda a la Investigación en Reumatología del Hospital Universitario de Canarias) |
| Siegel (2017) <sup>69</sup>              | SR          | Reviews, RCTs, observational | Aerobic exercise         | 2                          | <b>Not reported</b>                                                                                                                                                                                               |
| Larkin (2014) <sup>70</sup>              | SR          | RCTs, observational          | Physical activity levels | 10                         | “Funded by lead author as part of her postgraduate studies”                                                                                                                                                       |

MA = meta-analysis, RA = rheumatoid arthritis, RCT = randomised controlled trial, SR = systematic review

## Supplementary table 29 – Description of original studies of aerobic exercise in RA

Table – Aerobic exercise (RA), description of included studies

| Author (date) [country]                   | Study design | Inclusion criteria                                                                                                                                                                                                                                                                                                                                                                                             | Exposure detail                                                                                                                                                                                                                                           | N                       | Age years, mean (SD)                               | N (%) female                                 | Funders                                                                                                                                                                              |
|-------------------------------------------|--------------|----------------------------------------------------------------------------------------------------------------------------------------------------------------------------------------------------------------------------------------------------------------------------------------------------------------------------------------------------------------------------------------------------------------|-----------------------------------------------------------------------------------------------------------------------------------------------------------------------------------------------------------------------------------------------------------|-------------------------|----------------------------------------------------|----------------------------------------------|--------------------------------------------------------------------------------------------------------------------------------------------------------------------------------------|
| Katz (2018) [USA] <sup>71</sup>           | RCT          | Physician diagnosed RA, English/Spanish speaker, able to attend 3 research visits, Fatigue Short Form $\geq 18$<br>Exclusions: BMI < 20, engaged in regular exercise, nonambulatory, condition that would prevent walking, lower extremity joint surgery upcoming or in past 6 months, myocardial infarction in last 6 months, stroke, congestive heart failure, severe chronic obstructive pulmonary disorder | 1) Received pedometer + diary to keep track of step count<br>2) Pedometer + sleep target<br>p) education only                                                                                                                                             | 1) 34<br>2) 34<br>p) 28 | 1) 55.9 (12.4)<br>2) 50.2 (14.1)<br>p) 59.1 (12.5) | 1) 30 (88.2)<br>2) 30 (88.2)<br>p) 24 (85.7) | <b>Charity</b> (Rheumatology Research Foundation)                                                                                                                                    |
| Baxter (2016) [New Zealand] <sup>72</sup> | RCT          | 2010 ACR RA criteria, symptom duration > 2 years, aged > 20 years, fluent English<br>Exclusions: medical condition preventing completion of the intervention, cognitive impairment                                                                                                                                                                                                                             | 1) Walking pre-defined route, 3-4 times per week for 6 weeks<br>p) Nutritional advice + usual care                                                                                                                                                        | 1) 11<br>p) 22          | 1) 66.6 (10.1)<br>p) 59.4 (12.9)                   | Not reported                                 | <b>Charity</b> (Maurice and Phyllis Paykel Trust)                                                                                                                                    |
| Feldthusen (2016) [Sweden] <sup>73</sup>  | RCT          | RA (ICD10), aged 20-65 years, DAS28 < 3.8, Fatigue VAS > 50, symptom duration > 3 years, stable medication for > 6 months<br>Exclusions: other illnesses precluding study participation, inability to communicate in Swedish                                                                                                                                                                                   | 1) 12 weeks moderate and vigorous physical exercise therapy + guidelines for balancing stress and developing a self-care plan<br>p) No exercise                                                                                                           | 1) 36<br>p) 34          | 1) 54.2 (8.5)<br>p) 52.7 (10.9)                    | 1) 32 (88.9)<br>p) 30 (88.2)                 | <b>University</b> (University of Gothenburg Centre for Person-Centred Care, Medical Faculty – University of Gothenburg Sahlgrenska),<br><b>Government</b> (Swedish Research Council) |
| Sjoquist (2011) [Sweden] <sup>74</sup>    | RCT          | Aged > 18 years, communicate in Swedish, Perform body function test                                                                                                                                                                                                                                                                                                                                            | 1) One year program aim at implementing healthy physical activity (moderate intensity, 30 mins $\geq 4$ x per week). Coached on how to perform exercises<br>p) Did not received intervention<br>[Long-term follow-up of Brodin et al (2008) <sup>75</sup> | 1) 94<br>p) 134         |                                                    |                                              |                                                                                                                                                                                      |
| Brodin (2008) [Sweden] <sup>75</sup>      | RCT          | Aged > 18 years, communicate in Swedish, Perform body function test                                                                                                                                                                                                                                                                                                                                            | 1) One year program aim at implementing healthy physical activity (moderate intensity, 30 mins $\geq 4$ x per week). Coached on how to perform exercises<br>p) Did not received intervention                                                              | 1) 94<br>p) 134         | 1) 54 (14.0)<br>p) 56 (13.9)                       | 1) 68 (72.3)<br>p) 101 (75.4)                | <b>Government, Charity, and Professional body §</b>                                                                                                                                  |

§Swedish Research Council, the Vårdal Foundation, the Swedish Rheumatism Association, the Vasterbotten County Council Research Fund, the Stockholm County Council (EXPO), the Signe and Reinhold Sund Foundation, the Dalarna Research Council, the Rune and Ulla Almlöv Foundation, the Swedish Social Insurance Agency (Dagmar 1999), and the Health Care Science Postgraduate School at Karolinska Institutet. ACR = American College of Rheumatology, BMI = body mass index, DAS28 = Disease Activity Score 28, DMARDs = Disease Modifying Anti-Rheumatic Drugs, HAQ = Health Assessment Questionnaire, N = number, RA = rheumatoid arthritis, RCT = randomised controlled trial, SD = standard deviation, USA = United States of America, VAS = Visual Analogue Scale

Table – Aerobic exercise (RA) cont., description of included studies

| Author (date) [country]                  | Study design | Inclusion criteria                                                                                                                                                                                          | Exposure detail                                                                                                                                                                                                                | N                                         | Age years, mean (SD)                                                                                   | N (%) female                                                               | Funders                                                                                                                                                                          |
|------------------------------------------|--------------|-------------------------------------------------------------------------------------------------------------------------------------------------------------------------------------------------------------|--------------------------------------------------------------------------------------------------------------------------------------------------------------------------------------------------------------------------------|-------------------------------------------|--------------------------------------------------------------------------------------------------------|----------------------------------------------------------------------------|----------------------------------------------------------------------------------------------------------------------------------------------------------------------------------|
| Li (2006) [Canada] <sup>76</sup>         | RCT          | Required physical therapy and/or occupational therapy, not received rehabilitation in last 2 years<br>Exclusions: joint replacement surgery in last 3 months, scheduled to receive surgery in next 3 months | 1) Physical therapist model – education on diagnosis, pain management, energy conservation and joint protection, advice on exercises and assistive devices<br>p) Traditional treatment model including info on pain management | 1) 63<br>p) 48                            | 1) 54.2 (14.4)<br>p) 56.8 (13.2)                                                                       | 1) 55 (87.3)<br>p) 38 (79.2)                                               | <b>Government</b> (Canadian Institutes of Health Research)                                                                                                                       |
| Melikoglu (2006) [Turkey] <sup>77</sup>  | RCT          | 1987 ACR RA criteria, Not clinically active disease (clinically active = morning stiffness >30 mins, ≥6 tender joints, ≥3 swollen joints, ESR >22mm/h), stable DMARDs, Functional Class I-II                | 1) Treadmill exercises<br>2) Range of motion exercises                                                                                                                                                                         | 1) 20<br>2) 20                            | 1) 46.4 (8.3)<br>2) 50.3 (9.7)                                                                         | 1) 20 (100)<br>2) 20 (100)                                                 | <b>Not reported</b>                                                                                                                                                              |
| Hansen (1993) [Denmark] <sup>78</sup>    | RCT          | Definite or classical RA<br>Exclusions: Functional status III-IV, aged <20 or >60 years, disease other than RA with contraindicate / make physical training impossible, already training ≥3x per week       | 1) Self-training after instruction<br>2) As 1, plus training with physio once per week<br>3) As 1 plus weekly group training<br>4) As 3 plus training in hot pool<br>p) No training                                            | 1) 15<br>2) 15<br>3) 15<br>4) 15<br>p) 15 | Median (IQR)<br>1) 55 (44, 58)<br>2) 52 (46, 58)<br>3) 51 (42, 56)<br>4) 54 (44, 56)<br>p) 51 (46, 57) | 1) 12 (80.0)<br>2) 7 (46.7)<br>3) 9 (60.0)<br>4) 11 (73.3)<br>p) 10 (66.7) | <b>Charity</b> (Danish Arthritis Foundation, Danish Physiotherapists' Research Fund),<br><b>Government</b> (Danish Research Council, Fund for Medical Research in South Jutland) |
| Nordstrom (1996) [Finland] <sup>79</sup> | NRT          | 1987 ACR RA criteria                                                                                                                                                                                        | 1) 3 week program of aerobic exercises plus pain relief, steroid injections and range of motion physio<br>p) outpatient physiotherapy                                                                                          | 1) 20<br>p) 6                             | Not reported                                                                                           | Not reported                                                               | <b>University</b> (Helsinki University Central Hospital, Centre for International Mobility),<br><b>Charity</b> (Invalid Foundation, Finska Lakaresallskapet, Perklen Foundation) |
| Minor (1995) [USA] <sup>80</sup>         | NRT          | Aged 21-64 years, women, expressed intent to exercise, no pre-existing medical condition, function class I-II                                                                                               | 1) 12 weeks – low impact aerobic dance, walking, aquatics<br>p) Usual care                                                                                                                                                     | 1) 20<br>p) 22                            | 1) 46.0 (13.1)<br>p) 54.8 (8.4)                                                                        | 1) 20 (100)<br>p) 22 (100)                                                 | <b>Charity</b> (Arthritis Foundation),<br><b>Government</b> (NIDRR)                                                                                                              |
| Noreau (1995) [Canada] <sup>81</sup>     | NRT          | Confirmed diagnosis of RA, Functional class I-II, Free from unstable cardiopulmonary disease, no acute joint pain, ability to perform graded exercise on bike                                               | 1) 12 weeks, 2 sessions per week, 15-30 minutes aerobic exercise or aerobic dance without jumps. Also counselling with psychologist<br>p) No exercise control                                                                  | 1) 19<br>p) 10                            | 1) 49.3 (13.0)<br>p) 49.4 (11.9)                                                                       | 1) 12 (63.2)<br>p) 8 (80.0)                                                | <b>Hospital</b> (Centre Francois-Charon)                                                                                                                                         |

ACR = American College of Rheumatology, DAS28 = Disease Activity Score 28, DMARDs = Disease Modifying Anti-Rheumatic Drugs, ESR = erythrocyte sedimentation rate, IQR = interquartile range, N = number, NIDRR = National Institute on Disability and Rehabilitation Research, NRT = non-randomised trial, RA = rheumatoid arthritis, RCT = randomised controlled trial, SD = standard deviation, USA = United States of America, VAS = Visual Analogue Scale

Table – Aerobic exercise (RA) cont., description of included studies

| Author (date) [country]                  | Study design | Inclusion criteria                                                                                                                                                                                               | Exposure detail                                                                                                                                                                                                                                                                                                              | N                                       | Age years, mean (SD)                                               | N (%) female                          | Funders                                                                                                  |
|------------------------------------------|--------------|------------------------------------------------------------------------------------------------------------------------------------------------------------------------------------------------------------------|------------------------------------------------------------------------------------------------------------------------------------------------------------------------------------------------------------------------------------------------------------------------------------------------------------------------------|-----------------------------------------|--------------------------------------------------------------------|---------------------------------------|----------------------------------------------------------------------------------------------------------|
| Eklom (1975) [Sweden] <sup>82</sup>      | NRT          | Second or third degree RA, in a “non-acute stage”                                                                                                                                                                | 1) Intensive exercise group + continued training $\geq 4$ times per week<br>2) Intensive exercise group + continued training about 2 times per week<br>3) Intensive exercise group + stopped training<br>p1) Control group + continued training about 2 times per week<br>p2) Control group + no change to physical activity | 1) 6<br>2) 12<br>3) 5<br>p1) 3<br>p2) 4 | Not reported                                                       | Not reported                          | <b>Not reported</b>                                                                                      |
| Nadareishvili (2008) [USA] <sup>83</sup> | Case control | National Database for Rheumatic Diseases, aged 25-100 years                                                                                                                                                      | Amount of weekly exercise                                                                                                                                                                                                                                                                                                    | 1230                                    | At index event<br>cases:<br>70.0 (9.6)<br>Controls:<br>69.5 (10.6) | Cases:<br>74.6%<br>Controls:<br>74.7% | <b>Industry</b> (Abbott, Amgen, Wyeth-Australia, Merck, Pfizer)                                          |
| Wolfe (2008) [USA] <sup>84</sup>         | Pros. Obser. | National Database for Rheumatic Diseases                                                                                                                                                                         | Self-reported amount of physical exercise                                                                                                                                                                                                                                                                                    | 17738                                   | 18-103                                                             | 77.8%                                 | <b>Industry</b> (Abbott, Amgen, Wyeth-Australia, Merck, Pfizer)                                          |
| Stenstrom (1994) [Sweden] <sup>85</sup>  | Pros. Obser. | Classical or definite RA, functional class II, aged <70 years, absence of other chronic disease, no arthroplasty on weight bearing joints, no serious psychosocial complications, expressed interest in exercise | Patients self-reported average aerobic exercise frequency during 6 month period. Group divided into low and high frequency exercise at median value                                                                                                                                                                          | 69                                      | Low: 52 (12.2)<br>High: 56 (9.4)                                   | Low: 25 (73)<br>high: 31 (89)         | <b>Government</b> (Gavleborg County Council, Sormland County Council),<br><b>University</b> (Karolinska) |

N = number, NRT = non-randomised trial, Pros. Obser. = Prospective observational, RA = rheumatoid arthritis, SD = standard deviation, USA = United States of America

## Supplementary table 30 – Results from reviews and interventional studies of aerobic exercise in RA

Table – Aerobic exercise (RA), results and quality assessment

| Outcome (outcome measure) | Study (date) [study type]                              | Standardised result, SMD (95% CI) unless otherwise stated                                                                                                                                                                            | Natural result                                                                                                                                                                                                                              | AMSTAR2 quality | Rand. Seq. | Alloc. Conc. | Blind. Part. | Blind. Asses. |
|---------------------------|--------------------------------------------------------|--------------------------------------------------------------------------------------------------------------------------------------------------------------------------------------------------------------------------------------|---------------------------------------------------------------------------------------------------------------------------------------------------------------------------------------------------------------------------------------------|-----------------|------------|--------------|--------------|---------------|
| Pain                      | Hernandez-Hernandez (2017) [SR] <sup>68</sup>          |                                                                                                                                                                                                                                      | 1 MA <sup>86</sup> concluded that aerobic exercise improves pain (SMD 0.31 [95% CI 0.06, 0.55])                                                                                                                                             | Critically low  |            |              |              |               |
|                           | Siegel (2017) [SR] <sup>69</sup>                       |                                                                                                                                                                                                                                      | 1 MA <sup>86</sup> concluded that aerobic exercise improves pain (SMD 0.31 [95% CI 0.06, 0.55])                                                                                                                                             | Moderate        |            |              |              |               |
|                           | Larkin (2014) [SR] <sup>70</sup>                       |                                                                                                                                                                                                                                      | No correlation between pain and physical activity                                                                                                                                                                                           | Low             |            |              |              |               |
|                           | Katz (2018) [RCT] <sup>71</sup>                        | <u>Exercise vs control at week 21</u><br>Pedometer vs control: SMD 0.19 (-0.31, 0.70)<br>Pedometer + sleep target vs control: SMD -0.20 (-0.70, 0.30)                                                                                | <u>Pain interference, BL / week 21, mean (SD)</u><br>Pedometer: 61.7 (6.4) / 59.2 (7.6)<br>Pedometer + sleep target: 61.1 (8.1) / 55.9 (8.3)<br>Control: 59.8 (7.3) / 57.6 (9.0)                                                            |                 | H/UC       | L            | H/UC         | H/UC          |
|                           | Feldthusen (2016) [RCT] <sup>73</sup>                  | <u>Exercise vs control at 12 weeks</u><br>SMD -0.24 (-0.71, 0.23)                                                                                                                                                                    | <u>Pain VAS, BL / 12 weeks, mean (SD)</u><br>Exercise: 38.7 (22.0) / 33.8 (21.2)<br>Control: 40.9 (20.9) / 39.1 (23.7)                                                                                                                      |                 | L          | L            | H/UC         | L             |
|                           | Sjoquist (2011) [RCT] <sup>74</sup>                    | <u>Exercise vs control at 2 years</u><br>SMD 0.16 (-0.11, 0.42)                                                                                                                                                                      | <u>Pain VAS, BL / 2 years, mean (SD §)</u><br>Exercise: 34.0 (18.2) / 34.3 (18.2)<br>Control: 35.5 (18.8) / 31.5 (17.7)                                                                                                                     |                 | L          | H/UC         | H/UC         | L             |
|                           | Brodin (2008) [RCT] <sup>75</sup>                      | <u>Exercise vs control at 1 year</u><br>SMD -0.13 (-0.40, 0.13)                                                                                                                                                                      | <u>Pain VAS, BL / 1 year, mean (SD §)</u><br>Exercise: 34.8 (18.8) / 34.8 (18.8)<br>Control: 35.5 (18.8) / 37.3 (18.8)                                                                                                                      |                 | L          | H/UC         | H/UC         | L             |
|                           | Li (2006) [RCT] <sup>76</sup>                          | <u>Exercise education vs control at 6 months</u><br>SMD 0.06 (-0.31, 0.44)                                                                                                                                                           | <u>Pain VAS (0-10), BL / 6 months, mean (SD)</u><br>Exercise education: 6.86 (2.43) / 5.73 (2.72)<br>Control: 6.79 (2.34) / 5.57 (2.40)                                                                                                     |                 | L          | H/UC         | H/UC         | H/UC          |
|                           | Melikoglu (2006) [RCT] <sup>77</sup>                   | <u>Aerobic exercise vs range of motion at 15 days</u><br>SMD -0.22 (-0.84, 0.40)                                                                                                                                                     | <u>Pain VAS, BL / 15 days, mean (SD)</u><br>Aerobic exercise: 5.2 (1.7) / 4.3 (1.2)<br>Range of motion: 4.5 (2.3) / 4.6 (2.3)                                                                                                               |                 | H/UC       | H/UC         | H/UC         | L             |
|                           | Hansen (1993) [RCT] <sup>78</sup>                      | <u>Exercise vs control at 2 years</u><br>Individual vs control: SMD -1.33 (-2.13, -0.54)<br>Physio vs control: SMD 0.33 (-0.39, 1.05)<br>Group vs control: SMD 1.00 (0.24, 1.76)<br>Group + pool vs control: SMD -0.49 (-1.21, 0.24) | <u>Pain VAS, BL / 2 years, mean (SD †)</u><br>Individual exercise: 1.6 (0.3) / 1.4 (0.3)<br>Physio: 1.8 (0.4) / 1.9 (0.3)<br>Group training: 1.9 (0.4) / 2.1 (0.3)<br>Group + pool: 1.9 (0.2) / 1.6 (0.5)<br>Control: 1.9 (0.2) / 1.8 (0.3) |                 | H/UC       | H/UC         | H/UC         | L             |
|                           | Bespoke meta-analysis including <sup>71,73,75,78</sup> | <u>Exercise vs control</u><br>SMD -0.28 (-0.71, 0.16), I <sup>2</sup> 71.1%                                                                                                                                                          |                                                                                                                                                                                                                                             |                 |            |              |              |               |

§ Mean (SD) estimated from median (range) using published formula<sup>87</sup>† Mean (SD) estimated from median (interquartile range) using published formula<sup>87</sup>

Alloc. Conc. = allocation concealment, AMSTAR2 = Assessing the Methodological Quality of Systematic Reviews, BL = baseline, Blind. Asses. = Blinded assessors, Blind. Part. = blinded participants, CI = confidence interval, H/UC = high / unclear risk of bias, L = low risk of bias, RA rheumatoid arthritis, Rand. Seq. = random sequence generation, RCT = randomised controlled trial, SD = standard deviation, SMD = standardised mean difference, SR = systematic review, VAS = visual analogue scale



Table – Aerobic exercise (RA) cont., results and quality assessment

| Outcome (outcome measure) | Study (date) [study type]            | Standardised result, SMD (95% CI) unless otherwise stated         | Natural result                                                                                                                     | AMSTAR2 quality | Rand. Seq. | Alloc. Conc. | Blind. Part. | Blind. Asses. |
|---------------------------|--------------------------------------|-------------------------------------------------------------------|------------------------------------------------------------------------------------------------------------------------------------|-----------------|------------|--------------|--------------|---------------|
| Pain                      | Nordstrom (1996) [NRT] <sup>79</sup> | <u>Exercise vs physio at 6 months</u><br>SMD 0.26 (-0.66, 1.17)   | <u>Pain VAS, BL / 6 months, mean (SD)</u><br>Exercise intervention: 42.5 (24.5) / 30.7 (23.7)<br>Physio: 46.7 (21.0) / 24.8 (18.8) |                 |            |              |              |               |
|                           | Noreau (1995) [NRT] <sup>81</sup>    | <u>Exercise vs control at 12 weeks</u><br>SMD -0.12 (-0.89, 0.65) | <u>Pain (AIMS), BL / 12 weeks, mean (SD)</u><br>Exercise: 4.37 (2.15) / 3.47 (1.85)<br>Control: 4.00 (2.15) / 3.70 (2.06)          |                 |            |              |              |               |

AIM = Arthritis Impact Measurement Scale, Alloc. Conc. = allocation concealment, AMSTAR2 = Assessing the Methodological Quality of Systematic Reviews, BL = baseline, Blind. Asses. = Blinded assessors, Blind. Part. = blinded participants, CI = confidence interval, H/UC = high / unclear risk of bias, L = low risk of bias, NRT = non-randomised trial, RA rheumatoid arthritis, Rand. Seq. = random sequence generation, SD = standard deviation, SMD = standardised mean difference, VAS = visual analogue scale

Table – Aerobic exercise (RA), results and quality assessment

| Outcome (outcome measure) | Study (date) [study type]                        | Standardised result, SMD (95% CI) unless otherwise stated                                                                                       | Natural result                                                                                                                                                    | AMSTAR2 quality | Rand. Seq. | Alloc. Conc. | Blind. Part. | Blind. Asses. |
|---------------------------|--------------------------------------------------|-------------------------------------------------------------------------------------------------------------------------------------------------|-------------------------------------------------------------------------------------------------------------------------------------------------------------------|-----------------|------------|--------------|--------------|---------------|
| Function                  | Hernandez-Hernandez (2017) [SR] <sup>68</sup>    |                                                                                                                                                 | 1 MA <sup>86</sup> concluded that aerobic exercise improves function (SMD 0.24 [95% CI 0.10, 0.38])                                                               | Critically low  |            |              |              |               |
|                           | Larkin (2014) [SR] <sup>70</sup>                 |                                                                                                                                                 | No correlation between function and physical activity                                                                                                             | Low             |            |              |              |               |
|                           | Katz (2018) [RCT] <sup>71</sup>                  | Exercise vs control at week 21<br>Pedometer vs control: SMD -0.09 (-0.60, 0.41)<br>Pedometer + sleep target vs control: SMD -0.35 (-0.86, 0.15) | HAQ, BL / week 21, mean (SD)<br>Pedometer: 1.39 (0.62) / 1.26 (0.66)<br>Pedometer + sleep target: 1.39 (0.68) / 1.08 (0.74)<br>Control: 1.28 (0.63) / 1.32 (0.61) |                 | H/UC       | L            | H/UC         | H/UC          |
|                           | Sjoquist (2011) [RCT] <sup>74</sup>              | Exercise vs control at 2 years<br>SMD 0.24 (-0.03, 0.50)                                                                                        | HAQ, BL / 2 years, mean (SD \$)<br>Exercise: 0.81 (0.45) / 0.79 (0.48)<br>Control: 0.88 (0.48) / 0.69 (0.38)                                                      |                 | L          | H/UC         | H/UC         | L             |
|                           | Brodin (2008) [RCT] <sup>75</sup>                | Exercise vs control at 1 year<br>SMD -0.29 (-0.56, -0.03)                                                                                       | HAQ, BL / 1 year, mean (SD \$)<br>Exercise: 0.81 (0.45) / 0.75 (0.40)<br>Control: 0.88 (0.48) / 0.88 (0.48)                                                       |                 | L          | H/UC         | H/UC         | L             |
|                           | Li (2006) [RCT] <sup>76</sup>                    | Exercise education vs control at 6 months<br>SMD 0.16 (-0.22, 0.54)                                                                             | HAQ, BL / 6 months, mean (SD)<br>Exercise education: 0.94 (0.66) / 0.92 (0.75)<br>Control: 0.82 (0.65) / 0.81 (0.60)                                              |                 | L          | H/UC         | H/UC         | H/UC          |
|                           | Melikoglu (2006) [RCT] <sup>77</sup>             | Aerobic exercise vs range of motion at 15 days<br>SMD -0.06 (-0.68, 0.56)                                                                       | HAQ, BL / 15 days, mean (SD)<br>Aerobic exercise: 5.6 (5.3) / 4.7 (4.7)<br>Range of motion: 5.1 (5.5) / 5.0 (5.5)                                                 |                 | H/UC       | H/UC         | H/UC         | L             |
|                           | Bespoke meta-analysis including <sup>71,75</sup> | Exercise vs control<br>SMD -0.25 (-0.48, -0.01), I <sup>2</sup> 0.0%                                                                            |                                                                                                                                                                   |                 |            |              |              |               |
|                           | Nordstrom (1996) [NRT] <sup>79</sup>             | Exercise vs physio at 6 months<br>SMD -0.16 (-1.07, 0.75)                                                                                       | HAQ, BL / 6 months, mean (SD)<br>Exercise intervention: 5.5 (4.4) / 4.5 (3.1)<br>Physio: 5.5 (4.4) / 5.0 (3.3)                                                    |                 |            |              |              |               |
|                           | Noreau (1995) [NRT] <sup>81</sup>                | Exercise vs control at 12 weeks<br>SMD 0.11 (-0.66, 0.88)                                                                                       | Physical activity (AIMS), BL / 12 weeks, mean (SD)<br>Exercise: 3.79 (2.39) / 3.26 (2.51)<br>Control: 3.00 (2.36) / 3.00 (2.16)                                   |                 |            |              |              |               |

AIM = Arthritis Impact Measurement Scale, Alloc. Conc. = allocation concealment, AMSTAR2 = Assessing the Methodological Quality of Systematic Reviews, BL = baseline, Blind. Asses. = Blinded assessors, Blind. Part. = blinded participants, CI = confidence interval, H/UC = high / unclear risk of bias, HAQ = Health Assessment Questionnaire, L = low risk of bias, MA = meta-analysis, NRT = non-randomised trial, RA = rheumatoid arthritis, Rand. Seq. = random sequence generation, RCT = randomised controlled trial, SD = standard deviation, SMD = standardised mean difference, SR = systematic review

Table – Aerobic exercise (RA), results and quality assessment

| Outcome (outcome measure) | Study (date) [study type]                           | Standardised result, SMD (95% CI) unless otherwise stated                                                                                       | Natural result                                                                                                                                          | AMSTAR2 quality | Rand. Seq. | Alloc. Conc. | Blind. Part. | Blind. Asses. |
|---------------------------|-----------------------------------------------------|-------------------------------------------------------------------------------------------------------------------------------------------------|---------------------------------------------------------------------------------------------------------------------------------------------------------|-----------------|------------|--------------|--------------|---------------|
| Disease activity          | Hernandez-Hernandez (2017) [SR] <sup>68</sup>       |                                                                                                                                                 | 1 MA <sup>86</sup> concluded that aerobic exercise does not improve disease activity                                                                    | Critically low  |            |              |              |               |
|                           | Larkin (2014) [SR] <sup>70</sup>                    |                                                                                                                                                 | Weak positive correlations between disease activity and physical activity                                                                               | Low             |            |              |              |               |
|                           | Katz (2018) [RCT] <sup>71</sup>                     | Exercise vs control at week 21<br>Pedometer vs control: SMD -0.15 (-0.65, 0.36)<br>Pedometer + sleep target vs control: SMD -0.26 (-0.76, 0.25) | RADAI, BL / week 21, mean (SD)<br>Pedometer: 4.3 (2.0) / 3.8 (2.1)<br>Pedometer + sleep target: 4.4 (1.9) / 3.6 (1.9)<br>Control: 3.7 (2.0) / 4.1 (2.0) |                 | H/UC       | L            | H/UC         | H/UC          |
|                           | Feldthusen (2016) [RCT] <sup>73</sup>               | Exercise vs control at 12 weeks<br>SMD -0.16 (-0.63, 0.31)                                                                                      | DAS28, BL / 12 weeks, mean (SD)<br>Exercise: 3.5 (1.1) / 3.0 (1.1)<br>Control: 3.2 (1.1) / 3.2 (1.4)                                                    |                 | L          | L            | H/UC         | L             |
|                           | Sjoquist (2011) [RCT] <sup>74</sup>                 | Exercise vs control at 2 years<br>SMD 0.04 (-0.22, 0.30)                                                                                        | DAS28, BL / 2 years, mean (SD)<br>Exercise: 3.29 (1.54) / 2.93 (1.71)<br>Control: 3.22 (1.45) / 2.87 (1.38)                                             |                 | L          | H/UC         | H/UC         | L             |
|                           | Li (2006) [RCT] <sup>76</sup>                       | Exercise education vs control at 6 months<br>SMD 0.13 (-0.25, 0.50)                                                                             | RADAI, BL / 6 months, mean (SD)<br>Exercise education: 5.08 (2.03) / 4.24 (2.26)<br>Control: 4.98 (1.99) / 3.97 (1.89)                                  |                 | L          | H/UC         | H/UC         | H/UC          |
|                           | Bespoke meta-analysis including <sup>71,73,74</sup> | Exercise vs control<br>SMD 0.02 (-0.19, 0.23), I <sup>2</sup> 0.0%                                                                              |                                                                                                                                                         |                 |            |              |              |               |
| Tender joints             | Melikoglu (2006) [RCT] <sup>77</sup>                | Aerobic exercise vs range of motion at 15 days<br>SMD -0.04 (-0.66, 0.58)                                                                       | Ritchie Index, BL / 15 days, mean (SD)<br>Aerobic exercise: 15.3 (10.1) / 11.1 (6.9)<br>Range of motion: 12.5 (11.6) / 11.4 (8.4)                       |                 | H/UC       | H/UC         | H/UC         | L             |
|                           | Nordstrom (1996) [NRT] <sup>79</sup>                | Exercise vs physio at 6 months<br>SMD 0.11 (-0.80, 1.03)                                                                                        | Joint score index, BL / 6 months, mean (SD)<br>Exercise intervention: 8.7 (4.6) / 6.2 (4.7)<br>Physio: 5.7 (3.0) / 5.7 (3.5)                            |                 |            |              |              |               |
|                           | Noreau (1995) [NRT] <sup>81</sup>                   | Exercise vs control at 12 weeks<br>SMD 0.23 (-0.54, 1.00)                                                                                       | Tender joint count, BL / 12 weeks, mean (SD)<br>Exercise: 3.11 (3.45) / 2.05 (1.84)<br>Control: 2.30 (1.49) / 1.60 (2.12)                               |                 |            |              |              |               |

Alloc. Conc. = allocation concealment, AMSTAR2 = Assessing the Methodological Quality of Systematic Reviews, BL = baseline, Blind. Asses. = Blinded assessors, Blind. Part. = blinded participants, CI = confidence interval, DAS28 = Disease Activity Score 28, H/UC = high / unclear risk of bias, L = low risk of bias, MA = meta-analysis, NRT = non-randomised trial, RA = rheumatoid arthritis, RADAI = rheumatoid arthritis disease activity index, Rand. Seq. = random sequence generation, RCT = randomised controlled trial, SD = standard deviation, SMD = standardised mean difference, SR = systematic review

Table – Aerobic exercise (RA), results and quality assessment

| Outcome (outcome measure) | Study (date) [study type]                           | Standardised result, SMD (95% CI) unless otherwise stated                                                                                                                                                                                 | Natural result                                                                                                                                                                                                                                                         | AMSTAR2 quality | Rand. Seq. | Alloc. Conc. | Blind. Part. | Blind. Asses. |
|---------------------------|-----------------------------------------------------|-------------------------------------------------------------------------------------------------------------------------------------------------------------------------------------------------------------------------------------------|------------------------------------------------------------------------------------------------------------------------------------------------------------------------------------------------------------------------------------------------------------------------|-----------------|------------|--------------|--------------|---------------|
| Swollen joints            | Hansen (1993) [RCT] <sup>78</sup>                   | <u>Exercise vs control at 2 years</u><br>Individual vs control: SMD -0.90 (-1.65, -0.15)<br>Physio vs control: SMD -0.96 (-1.71, -0.20)<br>Group vs control: SMD -0.48 (-1.21, 0.25)<br>Group + pool vs control: SMD -1.16 (-1.94, -0.39) | <u>Swollen joint count, BL / 2 years, mean (SD †)</u><br>Individual exercise: 3.5 (1.3) / 3.4 (1.8)<br>Physio: 3.9 (1.0) / 3.3 (1.6)<br>Group training: 2.8 (1.3) / 4.5 (2.2)<br>Group + pool: 3.3 (0.9) / 2.8 (1.4)<br>Control: 3.7 (1.7) / 5.9 (3.5)                 |                 | H/UC       | H/UC         | H/UC         | L             |
|                           | Noreau (1995) [NRT] <sup>81</sup>                   | <u>Exercise vs control at 12 weeks</u><br>SMD 0.04 (-0.73, 0.80)                                                                                                                                                                          | <u>Swollen joint count, BL / 12 weeks, mean (SD)</u><br>Exercise: 4.79 (4.40) / 4.53 (4.07)<br>Control: 4.80 (3.26) / 4.40 (2.76)                                                                                                                                      |                 |            |              |              |               |
| Morning stiffness         | Melikoglu (2006) [RCT] <sup>77</sup>                | <u>Aerobic exercise vs range of motion at 15 days</u><br>SMD -0.35 (-0.97, 0.28)                                                                                                                                                          | <u>Morning stiffness (mins), BL / 15 days, mean (SD)</u><br>Aerobic exercise: 38.7 (32.7) / 30.5 (19.2)<br>Range of motion: 44.7 (41.1) / 41.2 (39.5)                                                                                                                  |                 | H/UC       | H/UC         | H/UC         | L             |
|                           | Hansen (1993) [RCT] <sup>78</sup>                   | <u>Exercise vs control at 2 years</u><br>Individual vs control: SMD -1.55 (-2.37, -0.73)<br>Physio vs control: SMD -0.36 (-1.08, 0.36)<br>Group vs control: SMD -1.98 (-2.87, -1.10)<br>Group + pool vs control: SMD -1.57 (-2.40, -0.75) | <u>Morning stiffness, BL / 2 years, mean (SD †)</u><br>Individual exercise: 39.3 (14.1) / 24.5 (10.9)<br>Physio: 33.5 (16.1) / 46.0 (18.4)<br>Group training: 32.5 (14.4) / 17.5 (8.6)<br>Group + pool: 58.8 (18.7) / 25.0 (8.6)<br>Control: 53.3 (19.3) / 53.8 (24.4) |                 | H/UC       | H/UC         | H/UC         | L             |
| QoL                       | Siegel (2017) [SR] <sup>69</sup>                    |                                                                                                                                                                                                                                           | 1 MA <sup>86</sup> concluded that aerobic exercise improves QoL                                                                                                                                                                                                        | Moderate        |            |              |              |               |
|                           | Baxter (2016) [RCT] <sup>72</sup>                   | <u>Exercise vs control, change BL-6 weeks</u><br>SMD 0.95 (0.19, 1.71)                                                                                                                                                                    | <u>EuroQoL, change bl-6 weeks, mean (SD)</u><br>Exercise: 5.0 (4.8)<br>Control: -0.1 (5.6) p=0.71                                                                                                                                                                      |                 | L          | L            | H/UC         | L             |
|                           | Feldthusen (2016) [RCT] <sup>73</sup>               | <u>Exercise vs control at 12 weeks</u><br>SMD 0.41 (-0.07, 0.88)                                                                                                                                                                          | <u>EQ5D, BL / 12 weeks, mean (SD)</u><br>Exercise: 52.3 (21.6) / 64.1 (18.1)<br>Control: 55.2 (20.1) / 57.0 (16.9)                                                                                                                                                     |                 | L          | L            | H/UC         | L             |
|                           | Brodin (2008) [RCT] <sup>75</sup>                   | <u>Exercise vs control at 1 year</u><br>SMD 0.32 (0.05, 0.58)                                                                                                                                                                             | <u>EQ5D, BL / 1 year, mean (SD §)</u><br>Exercise: 60.8 (18.8) / 67.0 (15.7)<br>Control: 61.0 (18.5) / 61.5 (18.3)                                                                                                                                                     |                 | L          | H/UC         | H/UC         | L             |
|                           | Bespoke meta-analysis including <sup>72,73,75</sup> | <u>Exercise vs control</u><br>SMD 0.41 (0.15, 0.68), I <sup>2</sup> 15.9%                                                                                                                                                                 |                                                                                                                                                                                                                                                                        |                 |            |              |              |               |

§ Mean (SD) estimated from median (range) using published formula<sup>87</sup>† Mean (SD) estimated from median (interquartile range) using published formula<sup>87</sup>

Alloc. Conc. = allocation concealment, AMSTAR2 = Assessing the Methodological Quality of Systematic Reviews, BL = baseline, Blind. Asses. = Blinded assessors, Blind. Part. = blinded participants, CI = confidence interval, H/UC = high / unclear risk of bias, L = low risk of bias, MA = meta-analysis, NRT = non-randomised trial, QoL = Quality of life, RA = rheumatoid arthritis, Rand. Seq. = random sequence generation, RCT = randomised controlled trial, SD = standard deviation, SMD = standardised mean difference

Table – Aerobic exercise (RA), results and quality assessment

| Outcome (outcome measure) | Study (date) [study type]                        | Standardised result, SMD (95% CI) unless otherwise stated                                                                                               | Natural result                                                                                                                                                 | AMSTAR2 quality | Rand. Seq. | Alloc. Conc. | Blind. Part. | Blind. Asses. |
|---------------------------|--------------------------------------------------|---------------------------------------------------------------------------------------------------------------------------------------------------------|----------------------------------------------------------------------------------------------------------------------------------------------------------------|-----------------|------------|--------------|--------------|---------------|
| Patient global            | Sjoquist (2011) [RCT] <sup>74</sup>              | <u>Exercise vs control at 2 years</u><br>SMD 0.01 (-0.25, 0.28)                                                                                         | <u>Patient global VAS, BL / 2 years, mean (SD §)</u><br>Exercise: 38.3 (17.6) / 32.0 (15.9)<br>Control: 34.5 (16.9) / 31.8 (17.9)                              |                 | L          | H/UC         | H/UC         | L             |
| Anxiety                   | Feldthusen (2016) [RCT] <sup>73</sup>            | <u>Exercise vs control at 12 weeks</u><br>SMD -0.71 (-1.19, -0.23)                                                                                      | <u>HADS anxiety, BL / 12 weeks, mean (SD)</u><br>Exercise: 5.9 (3.4) / 4.5 (3.4)<br>Control: 7.0 (4.4) / 7.2 (4.2)                                             |                 | L          | L            | H/UC         | L             |
| Depression                | Larkin (2014) [SR] <sup>70</sup>                 |                                                                                                                                                         | No correlation between depression and physical activity                                                                                                        | Low             |            |              |              |               |
|                           | Katz (2018) [RCT] <sup>71</sup>                  | <u>Exercise vs control at week 21</u><br>Pedometer vs control: SMD 0.24 (-0.26, 0.75)<br>Pedometer + sleep target vs control:<br>SMD 0.43 (-0.07, 0.94) | <u>PHQ-8, BL / week 21, mean (SD)</u><br>Pedometer: 9.2 (6.0) / 6.7 (4.9)<br>Pedometer + sleep target: 9.4 (5.3) / 7.3 (4.3)<br>Control: 7.4 (3.3) / 5.7 (2.8) |                 | H/UC       | L            | H/UC         | H/UC          |
|                           | Feldthusen (2016) [RCT] <sup>73</sup>            | <u>Exercise vs control at 12 weeks</u><br>SMD -0.54 (-1.02, -0.06)                                                                                      | <u>HADS depression, BL / 12 weeks, mean (SD)</u><br>Exercise: 5.7 (3.2) / 4.3 (2.8)<br>Control: 6.3 (3.7) / 6.0 (3.5)                                          |                 | L          | L            | H/UC         | L             |
|                           | Bespoke meta-analysis including <sup>71,73</sup> | <u>Exercise vs control</u><br>SMD -0.15 (-0.92, 0.62), I <sup>2</sup> 79.6%                                                                             |                                                                                                                                                                |                 |            |              |              |               |

§ Mean (SD) estimated from median (range) using published formula<sup>87</sup>

Alloc. Conc. = allocation concealment, AMSTAR2 = Assessing the Methodological Quality of Systematic Reviews, BL = baseline, Blind. Asses. = Blinded assessors, Blind. Part. = blinded participants, CI = confidence interval, H/UC = high / unclear risk of bias, HADS = Hospital Anxiety and Depression Scale, L = low risk of bias, MA = meta-analysis, PHQ-8 = Patient Health Questionnaire – 8, RA rheumatoid arthritis, Rand. Seq. = random sequence generation, RCT = randomised controlled trial, SD = standard deviation, SMD = standardised mean difference, SR = systematic review

Table – Aerobic exercise (RA), results and quality assessment

| Outcome (outcome measure) | Study (date) [study type]                        | Standardised result, SMD (95% CI) unless otherwise stated                                                                                                              | Natural result                                                                                                                                                                                                                                       | AMSTAR2 quality | Rand. Seq. | Alloc. Conc. | Blind. Part. | Blind. Asses. |
|---------------------------|--------------------------------------------------|------------------------------------------------------------------------------------------------------------------------------------------------------------------------|------------------------------------------------------------------------------------------------------------------------------------------------------------------------------------------------------------------------------------------------------|-----------------|------------|--------------|--------------|---------------|
| Fatigue                   | Rongen-van Dartel (2015) [MA] <sup>67</sup>      | <u>Exercise vs no exercise</u><br>All studies: SMD -0.31 (-0.55, -0.06)<br>Low risk of bias: SMD -0.15 (-0.57, 0.27)<br>Unclear risk of bias: SMD -0.39 (-0.70, -0.09) |                                                                                                                                                                                                                                                      | Moderate        |            |              |              |               |
|                           | Larkin (2014) [SR] <sup>70</sup>                 |                                                                                                                                                                        | Negative correlation between fatigue and physical activity                                                                                                                                                                                           | Low             |            |              |              |               |
|                           | Katz (2018) [RCT] <sup>71</sup>                  | <u>Exercise vs control at week 21</u><br>Pedometer vs control: SMD 0.07 (-0.44, 0.57)<br>Pedometer + sleep target vs control: SMD -0.12 (-0.62, 0.38)                  | <u>Fatigue Short form, BL / week 21, mean (SD)</u><br>Pedometer: 59.7 (6.4) / 56.6 (7.7)<br>Pedometer + sleep target: 60.3 (6.3) / 55.2 (7.1)<br>Control: 57.5 (7.5) / 56.1 (7.5)                                                                    |                 | H/UC       | L            | H/UC         | H/UC          |
|                           | Feldthusen (2016) [RCT] <sup>73</sup>            | <u>Exercise vs control at 12 weeks</u><br>VAS: SMD -0.27 (-0.74, 0.20)<br>BRAFF-MDQ: -0.66 (-1.14, -0.18)                                                              | <u>VAS fatigue, BL / 12 weeks, mean (SD)</u><br>Exercise: 69.5 (17.1) / 45.5 (21.6)<br>Control: 66.9 (14.3) / 51.5 (23.0)<br><u>BRAFF-MDQ, BL / 12 weeks, mean (SD)</u><br>Exercise: 37.7 (11.4) / 25.9 (11.5)<br>Control: 39.8 (10.6) / 33.1 (10.2) |                 | L          | L            | H/UC         | L             |
|                           | Bespoke meta-analysis including <sup>71,73</sup> | <u>Exercise vs control</u><br>SMD -0.30 (-1.01, 0.41), I <sup>2</sup> 76.2%                                                                                            |                                                                                                                                                                                                                                                      |                 |            |              |              |               |

Alloc. Conc. = allocation concealment, AMSTAR2 = Assessing the Methodological Quality of Systematic Reviews, BL = baseline, Blind. Asses. = Blinded assessors, Blind. Part. = blinded participants, BRAFF-MDQ = Bristol Rheumatoid Arthritis Fatigue – Multidimensional Questionnaire, CI = confidence interval, H/UC = high / unclear risk of bias, L = low risk of bias, MA = meta-analysis, NRT = non-randomised trial, RA rheumatoid arthritis, Rand. Seq. = random sequence generation, RCT = randomised controlled trial, SD = standard deviation, SMD = standardised mean difference, SR = systematic review, VAS = visual analogue scale

Table – Aerobic exercise (RA), results and quality assessment

| Outcome (outcome measure) | Study (date) [study type]                        | Standardised result, SMD (95% CI) unless otherwise stated                                                                                                                                                                                | Natural result                                                                                                                                                                                                                                                                                                                                                                                       | AMSTAR2 quality | Rand. Seq. | Alloc. Conc. | Blind. Part. | Blind. Asses. |
|---------------------------|--------------------------------------------------|------------------------------------------------------------------------------------------------------------------------------------------------------------------------------------------------------------------------------------------|------------------------------------------------------------------------------------------------------------------------------------------------------------------------------------------------------------------------------------------------------------------------------------------------------------------------------------------------------------------------------------------------------|-----------------|------------|--------------|--------------|---------------|
| Self-efficacy             | Baxter (2016) [RCT] <sup>72</sup>                | <u>Exercise vs control, change BL-6 weeks</u><br>SMD 1.06 (0.29, 1.83)                                                                                                                                                                   | <u>ASES, change bl-6 weeks, mean (SD)</u><br>Exercise: 22.6 (24.0)<br>Control: -3.5 (25.0) p=0.82                                                                                                                                                                                                                                                                                                    |                 | L          | L            | H/UC         | L             |
|                           | Feldthusen (2016) [RCT] <sup>73</sup>            | <u>Exercise vs control at 12 weeks</u><br>SMD 0.53 (0.06, 1.01)                                                                                                                                                                          | <u>ASES, BL / 12 weeks, mean (SD)</u><br>Exercise: 61.4 (13.1) / 68.7 (15.8)<br>Control: 58.2 (15.9) / 60.0 (16.9)                                                                                                                                                                                                                                                                                   |                 | L          | L            | H/UC         | L             |
|                           | Li (2006) [RCT] <sup>76</sup>                    | <u>Exercise education vs control at 6 months</u><br>Self-management: SMD 0.12 (-0.26, 0.50)<br>Disease management: SMD 0.04 (-0.34, 0.42)<br>Achieve outcomes: SMD -0.21 (-0.59, 0.16)                                                   | <u>Self-efficacy, BL / 6 months, mean (SD)</u><br><u>Self-management</u><br>Exercise education: 6.41 (1.56) / 6.71 (1.72)<br>Control: 6.44 (1.62) / 6.50 (1.81)<br><u>Disease management</u><br>Exercise education: 6.69 (2.06) / 6.97 (1.82)<br>Control: 7.27 (1.56) / 6.90 (1.76)<br><u>Achieve outcome</u><br>Exercise education: 5.64 (1.95) / 5.74 (2.28)<br>Control: 6.08 (2.03) / 6.22 (2.21) |                 | L          | H/UC         | H/UC         | H/UC          |
|                           | Bespoke meta-analysis including <sup>72,73</sup> | <u>Exercise vs control</u><br>SMD 0.70 (0.22, 1.19), I <sup>2</sup> 22.5%                                                                                                                                                                |                                                                                                                                                                                                                                                                                                                                                                                                      |                 |            |              |              |               |
| CRP                       | Melikoglu (2006) [RCT] <sup>77</sup>             | <u>Aerobic exercise vs range of motion at 15 days</u><br>SMD 0.00 (-0.62, 0.62)                                                                                                                                                          | <u>CRP, BL / 15 days, mean (SD)</u><br>Aerobic exercise: 0.4 (0.1) / 0.4 (0.1)<br>Range of motion: 0.4 (0.1) / 0.4 (0.1)                                                                                                                                                                                                                                                                             |                 | H/UC       | H/UC         | H/UC         | L             |
|                           | Nordstrom (1996) [NRT] <sup>79</sup>             | <u>Exercise vs physio at 6 months</u><br>SMD -0.01 (-0.92, 0.90)                                                                                                                                                                         | <u>CRP, BL / 6 months, mean (SD)</u><br>Exercise intervention: 16.8 (15.2) / 15.8 (20.0)<br>Physio: 26.3 (14.3) / 16.0 (12.9)                                                                                                                                                                                                                                                                        |                 |            |              |              |               |
| ESR                       | Melikoglu (2006) [RCT] <sup>77</sup>             | <u>Aerobic exercise vs range of motion at 15 days</u><br>SMD 0.29 (-0.34, 0.91)                                                                                                                                                          | <u>ESR, BL / 15 days, mean (SD)</u><br>Aerobic exercise: 23.2 (5.1) / 24.3 (6.1)<br>Range of motion: 21.2 (5.4) / 22.4 (7.2)                                                                                                                                                                                                                                                                         |                 | H/UC       | H/UC         | H/UC         | L             |
|                           | Hansen (1993) [RCT] <sup>78</sup>                | <u>Exercise vs control at 2 years</u><br>Individual vs control: SMD -0.41 (-1.14, 0.31)<br>Physio vs control: SMD -1.06 (-1.83, -0.29)<br>Group vs control: SMD -0.41 (-1.14, 0.31)<br>Group + pool vs control: SMD -1.40 (-2.21, -0.60) | <u>ESR, BL / 2 years, mean (SD †)</u><br>Individual exercise: 32.3 (9.5) / 25.8 (11.2)<br>Physio: 25.5 (5.2) / 20.8 (6.0)<br>Group training: 22.0 (10.3) / 25.0 (14.9)<br>Group + pool: 21.3 (3.7) / 17.5 (6.3)<br>Control: 22.5 (5.7) / 30.5 (11.5)                                                                                                                                                 |                 | H/UC       | H/UC         | H/UC         | L             |

† Mean (SD) estimated from median (interquartile range using published formula<sup>87</sup>

Alloc. Conc. = allocation concealment, AMSTAR2 = Assessing the Methodological Quality of Systematic Reviews, ASES = Arthritis Self-efficacy Scale, BL = baseline, Blind. Asses. = Blinded assessors, Blind. Part. = blinded participants  
CI = confidence interval, CRP = C-Reactive Protein, ESR = erythrocyte sedimentation rate, H/UC = high / unclear risk of bias, L = low risk of bias, MA = meta-analysis, RA rheumatoid arthritis, Rand. Seq. = random sequence generation, RCT = randomised controlled trial, SD = standard deviation, SMD = standardised mean difference

Table – Aerobic exercise (RA), results and quality assessment

| Outcome (outcome measure) | Study (date) [study type]         | Standardised result, SMD (95% CI) unless otherwise stated                                                                                                                                                                                  | Natural result                                                                                                                                                                                                                                                   | AMSTAR2 quality | Rand. Seq. | Alloc. Conc. | Blind. Part. | Blind. Asses. |
|---------------------------|-----------------------------------|--------------------------------------------------------------------------------------------------------------------------------------------------------------------------------------------------------------------------------------------|------------------------------------------------------------------------------------------------------------------------------------------------------------------------------------------------------------------------------------------------------------------|-----------------|------------|--------------|--------------|---------------|
| Grip strength             | Larkin (2014) [SR] <sup>70</sup>  |                                                                                                                                                                                                                                            | No correlation between grip strength and physical activity                                                                                                                                                                                                       | Low             |            |              |              |               |
|                           | Brodin (2008) [RCT] <sup>75</sup> | <u>Exercise vs control at 1 year</u><br>SMD 0.44 (0.17, 0.71)                                                                                                                                                                              | <u>Grip strength, BL / 1 year, mean (SD §)</u><br>Exercise: 466.3 (210.2) / 536.8 (243.1)<br>Control: 435.0 (206.9) / 440.8 (200.7)                                                                                                                              |                 | L          | H/UC         | H/UC         | L             |
|                           | Minor (1995) [NRT] <sup>80</sup>  | <u>Exercise vs control at 12 months</u><br>0.28 (-0.33, 0.88)                                                                                                                                                                              | <u>Grip strength at 12 months, mean (SD)</u><br>Exercise: 110 (60)<br>Control: 95 (49)                                                                                                                                                                           |                 |            |              |              |               |
| Walk test                 | Ekblom (1975) [NRT] <sup>82</sup> | <u>Exercise vs control (p2) at 6 months</u><br>1 vs p2: SMD -1.79 (-3.32, -0.25)<br>2 vs p2: SMD -1.78 (-3.09, -0.47)<br>3 vs p2: SMD -0.84 (-2.23, 0.55)                                                                                  | <u>850m walk test (mins), BL / 6 months, mean (SD)</u><br>1) 9.38 (2.87) / 8.11 (1.41)<br>2) 8.76 (1.57) / 7.99 (1.64)<br>3) 11.09 (1.15) / 9.11 (2.50)<br>p1) 8.43 (0.80) / 7.30 (0.13)<br>p2) 10.43 (1.58) / 11.03 (1.95)                                      |                 |            |              |              |               |
|                           | Noreau (1995) [NRT] <sup>81</sup> | <u>Exercise vs control at 12 weeks</u><br>SMD -0.06 (-0.82, 0.71)                                                                                                                                                                          | <u>50ft walk, BL / 12 weeks, mean (SD)</u><br>Exercise: 6.37 (1.46) / 5.81 (1.40)<br>Control: 5.9 (0.8) / 5.9 (1.8)                                                                                                                                              |                 |            |              |              |               |
| Radiological damage       | Hansen (1993) [RCT] <sup>78</sup> | <u>Exercise vs control at 2 years</u><br>Individual vs control: SMD -1.76 (-2.61, -0.91)<br>Physio vs control: SMD -1.66 (-2.49, -0.82)<br>Group vs control: SMD -1.82 (-2.68, -0.96)<br>Group + pool vs control: SMD -1.74 (-2.59, -0.89) | <u>Larsen score, BL / 2 years, mean (SD †)</u><br>Individual exercise: 43.0 (19.0) / 50.0 (20.1)<br>Physio: 47.5 (9.2) / 57.8 (14.1)<br>Group training: 41.8 (17.0) / 53.3 (16.4)<br>Group + pool: 42.0 (19.5) / 51.5 (19.0)<br>Control: 70.8 (8.9) / 77.5 (9.2) |                 | H/UC       | H/UC         | H/UC         | L             |
| Work                      | Minor (1995) [NRT] <sup>80</sup>  | <u>Exercise vs control at 12 months</u><br>Hands: SMD 0.08 (-0.52, 0.69)<br>Lift: SMD 0.60 (-0.02, 1.22)<br>Legs: SMD 0.67 (0.05, 1.30)                                                                                                    | <u>Work Capacity Evaluation at 12 months, mean (SD)</u><br><u>Hands</u><br>Exercise: 1.8 (1.1)<br>Control: 1.7 (1.3)<br><u>Lift</u><br>Exercise: 2.6 (0.5)<br>Control: 2.3 (0.5)<br><u>Legs</u><br>Exercise: 2.9 (0.2)<br>Control: 2.5 (0.8)                     |                 |            |              |              |               |

† Mean (SD) estimated from median (interquartile range using published formula<sup>87</sup>)§ Mean (SD) estimated from median (range) using published formula<sup>87</sup>

Alloc. Conc. = allocation concealment, AMSTAR2 = Assessing the Methodological Quality of Systematic Reviews, BL = baseline, Blind. Asses. = Blinded assessors, Blind. Part. = blinded participants, CI = confidence interval, H/UC = high / unclear risk of bias, L = low risk of bias, NRT = non-randomised trial, RA rheumatoid arthritis, Rand. Seq. = random sequence generation, RCT = randomised controlled trial, SD = standard deviation, SMD = standardised mean difference



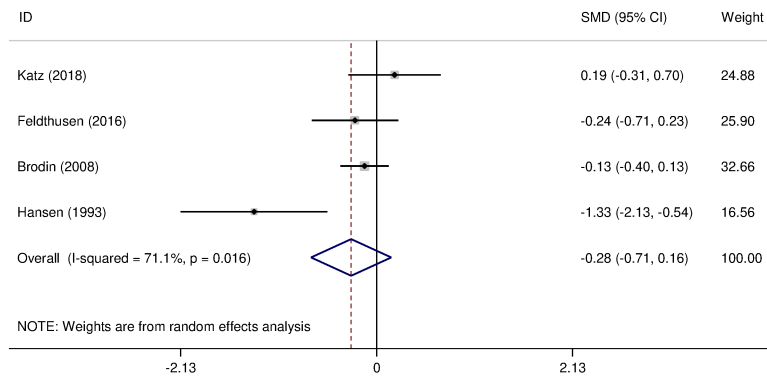

Figure – The effect of aerobic exercise on pain (RA)

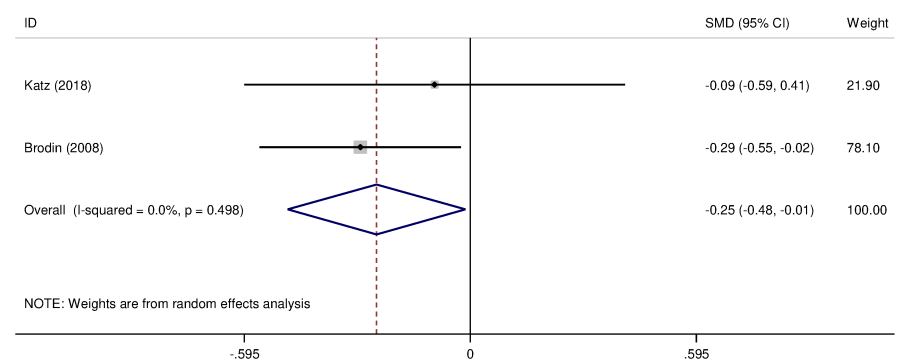

Figure – The effect of aerobic exercise on function (RA)

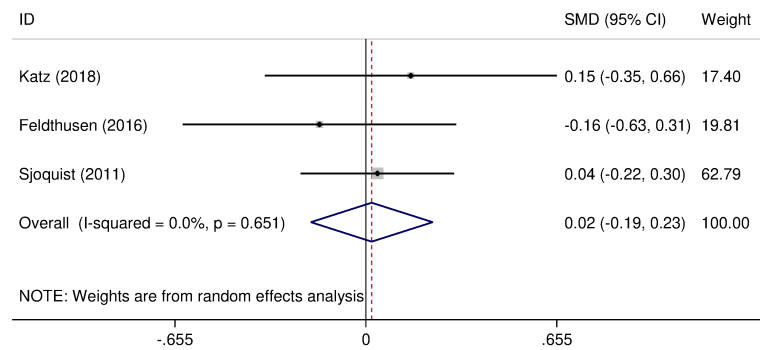

Figure – The effect of aerobic exercise on disease activity (RA)

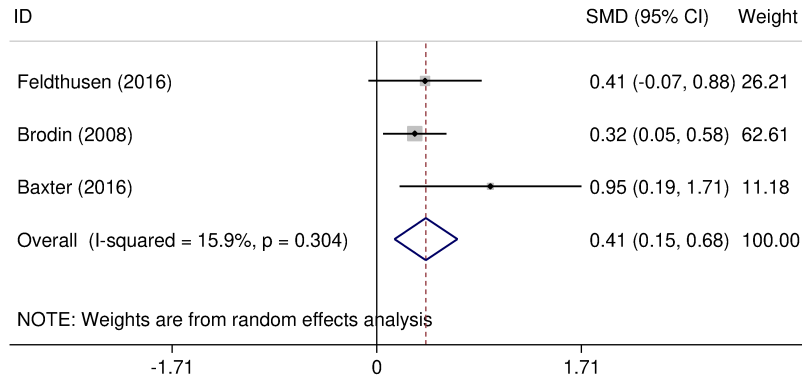

Figure – The effect of aerobic exercise on quality of life (RA)

## Supplementary table 31 – Results from observational studies of aerobic exercise in RA

Table – Aerobic exercise (RA), results and quality assessment – observational studies

| Outcome (outcome measure) | Study (date) [study type]                                     | Standardised result, SMD (95% CI) unless otherwise stated | Natural result                                                                                                                                                                                                                                                                               | Study Pop. | Attr. | Prog. Meas. | Outc. Meas. | Conf. | Stats. |
|---------------------------|---------------------------------------------------------------|-----------------------------------------------------------|----------------------------------------------------------------------------------------------------------------------------------------------------------------------------------------------------------------------------------------------------------------------------------------------|------------|-------|-------------|-------------|-------|--------|
| Tender joints             | Stenstrom (1994)<br>[Prospective observational] <sup>85</sup> |                                                           | <u>Ritchie Index at 4 years, mean (SD)</u><br>Low frequency exercise: 12 (8.9)<br>High frequency exercise: 12 (9.0)                                                                                                                                                                          | M          | M     | M           | L           | M     | M      |
| ESR                       | Stenstrom (1994)<br>[Prospective observational] <sup>85</sup> |                                                           | <u>Ritchie Index at 4 years, mean (SD)</u><br>Low frequency exercise: 39 (21.7)<br>High frequency exercise: 31 (19.3)                                                                                                                                                                        | M          | M     | M           | L           | M     | M      |
| Radiological damage       | Stenstrom (1994)<br>[Prospective observational] <sup>85</sup> |                                                           | <u>Larsen score at 4 years, mean (SD)</u><br>Low frequency exercise: 83 (31.6)<br>High frequency exercise: 82 (48.4)                                                                                                                                                                         | M          | M     | M           | L           | M     | M      |
| Comorbidity               | Nadareishvili (2008)<br>[Case-control] <sup>83</sup>          |                                                           | <u>Stroke, odds ratio (95% CI) [unadjusted]</u><br>Moderate or great vs low exercise: 1.29 (0.57, 2.91)                                                                                                                                                                                      | L          | M     | L           | L           | L     | M      |
|                           | Wolfe (2008)<br>[Prospective observational] <sup>84</sup>     |                                                           | <u>Myocardial infarction, hazard ratio (95% CI)</u><br><u>[adjusted for age &amp; sex]</u><br>Aerobic exercise, yes vs no: 0.8 (0.6, 1.1)<br><u>First myocardial infarction, hazard ratio (95% CI)</u><br><u>[adjusted for age &amp; sex]</u><br>Aerobic exercise, yes vs no: 0.7 (0.5, 1.0) | L          | M     | M           | L           | H     | L      |

Attr. = attrition, CI = confidence interval, Conf. = confounding, ESR = erythrocyte sedimentation rate, L = low risk of bias, M = moderate risk of bias, Outc. Meas = outcome measurement, Prog. Meas. = prognostic factor measurement, Pros. Obs. = prospective observational, RA = rheumatoid arthritis, Stats. = statistical analysis, Study Pop. = study population

## Supplementary table 32 – Description of original studies of aerobic + muscle strengthening exercise in RA

Table – Aerobic + muscle strengthening exercise (RA), description of included studies

| Author (date) [country]                          | Study design | Inclusion criteria                                                                                                                                                                                                                                                                                                                                                  | Exposure detail                                                                                                                                                                                                                                                                                                                                    | N              | Age years, mean (SD)             | N (%) female                 | Funders                                                                                                                                                                                                                                 |
|--------------------------------------------------|--------------|---------------------------------------------------------------------------------------------------------------------------------------------------------------------------------------------------------------------------------------------------------------------------------------------------------------------------------------------------------------------|----------------------------------------------------------------------------------------------------------------------------------------------------------------------------------------------------------------------------------------------------------------------------------------------------------------------------------------------------|----------------|----------------------------------|------------------------------|-----------------------------------------------------------------------------------------------------------------------------------------------------------------------------------------------------------------------------------------|
| Lange (2019) [Sweden] <sup>88</sup>              | RCT          | 1987 ACR RA criteria, aged ≥65 years, symptom duration >2 years, DAS28 <5.1<br>Exclusions: unstable ischemic heart disease or arrhythmia that might preclude moderate intensity exercise, ongoing exercise of moderate-high intensity ≥2x per week, inability to speak/understand Swedish, inability to participate in physical testing involving walking/bicycling | 1) Supervised exercise – aerobic and muscle strengthening, 2-3 sessions per week. 27 mins aerobic exercise at 70-89% max heart rate and 5 muscle strengthening exercises at 70-80% 1 repetition max<br>p) Individual meeting with physiotherapist where they were encouraged to follow the same exercise regime at home, but no gym-based exercise | 1) 36<br>p) 38 | 1) 69.1 (2.6)<br>p) 70.1 (2.3)   | 1) 27 (75.0)<br>p) 29 (76.3) | <b>University</b> (University of Gothenburg), <b>Government</b> (Health and Medical Care Committee of the Regional Executive Board), <b>Hospital</b> (Sahlgrenska University Hospital), <b>Charity</b> (Swedish Rheumatism Association) |
| Durcan (2014) [Ireland] <sup>89</sup>            | RCT          | 1987 ACR RA criteria<br>Exclusions: Not independently mobile, live >1 hours from assessment centre, were deemed a falls risk or had severe medical conditions that were more limiting than arthritis: congestive heart failure with functional limitation, angina, active malignancy, uncontrolled thyroid disease, severe COPD, neurological conditions.           | 1) 12 week home program including aerobic, muscle strengthening and range of motion exercises<br>p) Standard care                                                                                                                                                                                                                                  | 1) 40<br>p) 38 | 1) 61 (8.0)<br>p) 59 (12)        | 1) 30 (75.0)<br>p) 20 (52.6) | <b>Not reported</b>                                                                                                                                                                                                                     |
| Breedland (2011) [The Netherlands] <sup>90</sup> | RCT          | 1987 ACR RA criteria, aged 18-66 years<br>Exclusions: DAS28 > 5.1, cardiac or pulmonary diseases resulting in restrictions in ability to follow exercise program, functional class III-IV, no stable medication                                                                                                                                                     | 1) Group exercise consisting of muscle exercise circuit and bicycle training for 60 mins and aqua jogging for 30 mins 2x per week<br>p) Waitlist control                                                                                                                                                                                           | 1) 19<br>p) 15 | 1) 45 (11.9)<br>p) 51.8 (9.4)    | 1) 12 (63.2)<br>p) 12 (80.0) | <b>Charity</b> (Stichting Beatrixoord Noord-Nederland)                                                                                                                                                                                  |
| Hurkmans (2010) [The Netherlands] <sup>91</sup>  | RCT          | 1987 ACR RA, not physically active at moderate intensity, having a computer with internet, able to cycle on bicycle ergometer                                                                                                                                                                                                                                       | Long term follow-up of van den Berg <sup>92</sup> (see below)                                                                                                                                                                                                                                                                                      | 1) 56<br>p) 54 | 1) 50.6 (13.1)<br>p) 51.0 (10.9) | 1) 43 (76.8)<br>p) 40 (74.1) | <b>Not reported</b> – authors declare no conflict of interest                                                                                                                                                                           |
| Flint-Wagner (2009) [USA] <sup>93</sup>          | RCT          | 1987 ACR RA criteria, aged >18 years, functional class I-II, stable infliximab dose<br>Exclusions: participation in strength training exercise or an aerobic exercise regimen of 150 mins per week within past 3 months                                                                                                                                             | 1) 3x per week – walking warm up, strength training, aerobic exercise, abdominal exercises, cool down period<br>p) Usual care                                                                                                                                                                                                                      | 1) 16<br>p) 8  | 1) 52.2 (13)<br>p) 49.0 (12.6)   | 19 (79.2)                    | <b>Industry</b> (Centocor, Inc.)                                                                                                                                                                                                        |

ACR = American College of Rheumatology, DAS28 = Disease Activity Score 28, int.= intervention, N = number, RA = rheumatoid arthritis, RCT = randomised controlled trial, SD = standard deviation, USA = United States of America

Table – Aerobic + muscle strengthening exercise (RA), description of included studies

| Author (date) [country]                             | Study design | Inclusion criteria                                                                                                                                                                                                                                                                                                                                                                                                                                                       | Exposure detail                                                                                                                                                                                                                                                                                                            | N                       | Age years, mean (SD)                             | N (%) female                   | Funders                                                                                                           |
|-----------------------------------------------------|--------------|--------------------------------------------------------------------------------------------------------------------------------------------------------------------------------------------------------------------------------------------------------------------------------------------------------------------------------------------------------------------------------------------------------------------------------------------------------------------------|----------------------------------------------------------------------------------------------------------------------------------------------------------------------------------------------------------------------------------------------------------------------------------------------------------------------------|-------------------------|--------------------------------------------------|--------------------------------|-------------------------------------------------------------------------------------------------------------------|
| Bulthuis (2007) [The Netherlands] <sup>94</sup>     | RCT          | Admitted to hospital due to flare, or elective knee/hip replacement, 1987 ACR RA criteria, aged >18 years<br>Exclusions: serious cardiac disease, incapacitating pulmonary disease, serious hypertension (diastolic blood pressure >110 mmHg, pregnancy, insufficient understanding of Dutch, functional class IV                                                                                                                                                        | 1) 3 weeks intensive exercise program at resort – training with physio, aerobic and muscle strengthening exercises. Also hydrotherapy<br>p) Usual care                                                                                                                                                                     | 1) 58<br>p) 40          | 1) 69 (12)<br>p) 67 (11)                         | 1) 46 (79.3)<br>p) 31 (77.5)   | <b>Charity</b> (The Dutch Arthritis Foundation), RVVZ (not defined in paper)                                      |
| Neuberger (2007) [USA] <sup>95</sup>                | RCT          | 1987 ACR RA criteria, aged 40-70 years, communicate in English, ambulatory, no fibromyalgia or COPD, no beta-blockers or digitalis, not performing aerobic exercise 3x per week, having rheumatologist/physician approval to participate, meet criteria for aerobic fitness testing (no arrhythmias, recent myocardial infarction, acute infection, uncontrolled metabolic disease, known electrolyte abnormalities, or systolic BP 200 mm Hg or diastolic BP 115 mm Hg) | 1) 12 weeks – low impact aerobic/ muscle strengthening exercise for 1hr 3x per week in a supervised group setting<br>2) Same as above but at home via videotape<br>p) No exercise control                                                                                                                                  | 1) 68<br>2) 79<br>p) 73 | Median (range)<br>55.5 (40-70)                   | 82.7% female                   | <b>Government</b> (National Institute of Nursing Research of the NIH)                                             |
| van den Berg (2006) [The Netherlands] <sup>92</sup> | RCT          | 1987 ACR RA criteria, not physically active for 30 mins in succession at moderate intensity on at least 5 days a week, availability of a computer with internet facilities, able to cycle of exercise bike, interested in study of physical activity, no cardiopulmonary problems                                                                                                                                                                                        | 12 months of internet guided physical activity<br>1) individualised training – detailed physical activity program consisting of strengthening, range of motion, cycling on bike<br>2) general training intervention – had access to info about exercise, advised to complete recommended activity at least 5 days per week | 1) 82<br>p) 78          | 1) 49.5 (12.9)<br>p) 49.8 (13.9)                 | 1) 62 (75.6)<br>p) 60 (76.9)   | <b>Charity</b> (ZONMw [Netherlands Organization for Health Research and Development], Dutch Arthritis Foundation) |
| Munneke (2005) [The Netherlands] <sup>96</sup>      | RCT          | 1987 ACR RA criteria, aged 20-70 years, 3 months stable DMARDs, functional class I-III, ability to cycle on home trainer, willingness to exercise bi-weekly, living in predefined area<br>Exclusions: inability to tolerate cardiorespiratory fitness training due to serious cardiac or lung disease, presence of one or more prostheses of weight bearing joints                                                                                                       | 1) Twice weekly session, 75 mins each, aimed to maintain cardiorespiratory and muscular fitness and flexibility<br>p) Usual care                                                                                                                                                                                           | 1) 137<br>p) 140        | Median (range)<br>1) 54 (46-61)<br>p) 54 (44-62) | 1) 109 (79.6)<br>p) 112 (80.0) | <b>Government</b> (Dutch Health Care Insurance Board)                                                             |

ACR = American College of Rheumatology, BP = blood pressure, COPD = chronic obstructive pulmonary disorder, DMARDs = disease modifying anti-rheumatic drugs, int.= intervention, N = number, NIH = National Institutes for Health Research, RA = rheumatoid arthritis, RCT = randomised controlled trial, SD = standard deviation, USA = United States of America

Table – Aerobic + muscle strengthening exercise (RA), description of included studies

| Author (date) [country]                         | Study design | Inclusion criteria                                                                                                                                                                                                                                                                       | Exposure detail                                                                                                                                                                                                           | N                | Age years, mean (SD)                             | N (%) female                   | Funders                                                                                              |
|-------------------------------------------------|--------------|------------------------------------------------------------------------------------------------------------------------------------------------------------------------------------------------------------------------------------------------------------------------------------------|---------------------------------------------------------------------------------------------------------------------------------------------------------------------------------------------------------------------------|------------------|--------------------------------------------------|--------------------------------|------------------------------------------------------------------------------------------------------|
| de Jong (2004) [The Netherlands] <sup>97</sup>  | RCT          | 1987 ACR RA criteria, aged 20-70 years, functional class I-III, stable DMARDs for 3 months, ability to ride exercise bike<br>Exclusions: cardiac/pulmonary disease precluding high-intensity exercise, prostheses of weight bearing limbs, comorbidity strongly reducing life expectancy | 1) High intensity exercise – groups, 2x per week, aiming to increase and maintain cardiovascular and muscle fitness – 3 parts: bike training, exercise circuit, sport of game<br>p) Usual care                            | 1) 136<br>p) 145 | Median (IQR)<br>1) 54 (46, 61)<br>p) 54 (45, 62) | 1) 110 (80.9)<br>p) 115 (79.3) | <b>Government</b> (Dutch Health Care Insurance Board)                                                |
| de Jong (2004) [The Netherlands] <sup>98</sup>  | RCT          | See de Jong (2004) <sup>97</sup>                                                                                                                                                                                                                                                         | See de Jong (2004) <sup>97</sup>                                                                                                                                                                                          | 1) 136<br>p) 145 | 1) 54 (16)<br>p) 54 (16)                         | 1) 110 (81%)<br>p) 115 (79%)   | <b>Not reported</b>                                                                                  |
| Hakkinen et al (2004) [Finland] <sup>99</sup>   | RCT          | 1987 ACR RA criteria, <2 years symptom duration, no treatment of DMARDs / prednisolone before inclusion                                                                                                                                                                                  | 1) Strength training group – 2 years, home based, twice a week with moderate loads, encouraged to perform recreational physical activity (e.g. walking, skiing, cycling) 2x per week<br>p) Range of motion and stretching | 1) 31<br>p) 31   | 1) 49 (10)<br>p) 49 (11)                         | 1) 18 (58.1)<br>p) 20 (64.5)   | <b>Government</b> (Central Finland Health Care District)                                             |
| Hakkinen et al (2004) [Finland] <sup>100</sup>  | RCT          | See above                                                                                                                                                                                                                                                                                | See above                                                                                                                                                                                                                 | 1) 31<br>p) 31   | 1) 49 (10)<br>p) 49 (11)                         | 1) 18 (58.1)<br>p) 20 (64.5)   | <b>Government</b> (Central Finland Health Care District)                                             |
| de Jong (2003) [The Netherlands] <sup>101</sup> | RCT          | See de Jong (2004) <sup>97</sup>                                                                                                                                                                                                                                                         | See de Jong (2004) <sup>97</sup>                                                                                                                                                                                          | 1) 150<br>p) 150 | 1) 54.0 (16)<br>p) 53.5 (18)                     | 1) 119 (79.3)<br>p) 118 (78.7) | <b>Government</b> (Dutch Health Care Insurance Board)                                                |
| Westby (2000) [Canada] <sup>102</sup>           | RCT          | 1987 ACR RA criteria, symptom duration ≥1 year, functional class I-II, continuous low dose prednisone<br>Exclusions: fractures, significant cardiovascular disease, planned surgery, recent joint replacement (within 6 months, high dose prednisone (equivalent of 40mg/day ≥1 month    | 1) Attended education and given instructions for aerobic dance and strengthening program 3x per week for 45-60 mins<br>p) Asked to maintain previous level of exercise                                                    | 1) 14<br>p) 16   | 1) 56.4 (10.1)<br>p) 56 (10.8)                   | 1) 14 (100)<br>p) 16 (100)     | <b>Charity</b> (British Columbia Health Research Foundation, The Arthritis Society)                  |
| Hakkinen (1999) [Finland] <sup>103</sup>        | RCT          | See Hakkinen et al <sup>99</sup>                                                                                                                                                                                                                                                         | See Hakkinen et al <sup>99</sup>                                                                                                                                                                                          | 1) 32<br>p) 33   | 1) 49.4 (10.1)<br>p) 49.0 (10.7)                 | 1) 19 (59.4)<br>p) 21 (63.6)   | <b>Government</b> (Central Finland Health Care District), <b>Charity</b> (Yrjo Jahansson Foundation) |

ACR = American College of Rheumatology, DMARDs = disease modifying anti-rheumatic drugs, int.= intervention, N = number, RA = rheumatoid arthritis, RCT = randomised controlled trial, SD = standard deviation

Table – Aerobic + muscle strengthening exercise (RA), description of included studies

| Author (date) [country]                  | Study design | Inclusion criteria                                                                                                                                                                                                                                                                                                                                 | Exposure detail                                                                                                                                                                                                                      | N              | Age years, mean (SD)        | N (%) female                 | Funders                                                                                                                                                                |
|------------------------------------------|--------------|----------------------------------------------------------------------------------------------------------------------------------------------------------------------------------------------------------------------------------------------------------------------------------------------------------------------------------------------------|--------------------------------------------------------------------------------------------------------------------------------------------------------------------------------------------------------------------------------------|----------------|-----------------------------|------------------------------|------------------------------------------------------------------------------------------------------------------------------------------------------------------------|
| Lyngberg (1994) [Denmark] <sup>104</sup> | RCT          | 1987 ACR RA criteria, slight or moderate RA, 6 months steroid treatment (stable for 3 months, DMARDs stable for 4 months)<br>Exclusions: heart disease, inability to perform exercises, patients with disease that may cause sudden death                                                                                                          | 1) Progressive interval training (exercise bicycle) then strengthening exercises (heel lifts, step climbing) and stretching<br>p) Non-exercise control                                                                               | 1) 12<br>p) 12 | 1) 65 (10.8)<br>p) 68 (7.2) | 22 (91.7)                    | <b>Charity</b> (Danish Rheumatoid Arthritis Foundation, P. Carl Petersen Foundation, Grosserer A. V. Lykfeldt Foundation)                                              |
| Ekdahl (1990) [Sweden] <sup>105</sup>    | RCT          | Classical / definite RA involving joints of lower extremities, absence of other disease states that might influence results, functional class II, aged 20-65 years                                                                                                                                                                                 | 1) Dynamic training aiming to improve strength, endurance, balance and aerobic capacity<br>2) Static training aiming to prevent limitations of joint mobility and promote muscle strength                                            | 67             | 53.0 (10.2)                 | 43 (64.2)                    | <b>Charity</b> (Swedish Association Against Rheumatism, Signe and Reinhold Sund Foundation, Greta and Johan Kock Foundation), <b>Government</b> (Malmo County Council) |
| Lyngberg (1988) [Denmark] <sup>106</sup> | RCT †        | Definite or classical RA<br>Exclusions: Acute RA activity defined by the ARA, functional class III-IV and not able to use ergometerbicycle, not stable DMARDs/steroids for 6 months, not stable NSAIDs for 3 months, received intra-articular steroid injection less than 2 months ago, heart disease or non-acceptable exercise electrocardiogram | 1) Tailored exercise program according to patients capacity – exercise consisted of aerobic exercise (exercise bike) and dynamic strength training<br>p) Control period                                                              | 9              | N 30-49 >50<br>4 / 5        | 7 (77.8)                     | <b>Charity</b> (Danish Rheumatoid Arthritis Foundation)                                                                                                                |
| Nordemar (1981) [Sweden] <sup>107</sup>  | RCT          | Definite or classical RA, moderate disease activity, functional stage I-III<br>Exclusions: severe disease                                                                                                                                                                                                                                          | 1) Exercise bike, also swimming, skiing, cycling, dancing, gymnastics, fast walking, jogging, and various organised sports. Also participated in hospital exercise program led by physiotherapist – bike and strengthening exercises | 1) 23<br>p) 23 | 1) 56 (9)<br>p) 58 (10)     | 1) 19 (82.6)<br>p) 19 (82.6) | <b>Charity</b> (King Gustaf V 80 years fund, Swedish National Association against Rheumatism), <b>Government</b> (Swedish Medical Research Council)                    |

† Cross-over design

ACR = American College of Rheumatology, DMARDs = disease modifying anti-rheumatic drugs, HIV = human immunodeficiency virus, int.= intervention, N = number, RA = rheumatoid arthritis, RCT = randomised controlled trial, SD = standard deviation

Table – Aerobic + muscle strengthening exercise (RA), description of included studies

| Author (date) [country]                            | Study design    | Inclusion criteria                                                                                                                                                                 | Exposure detail                                                                                                                                                                                                                                                        | N              | Age years, mean (SD)            | N (%) female                 | Funders                                                                                                                                                                                                                         |
|----------------------------------------------------|-----------------|------------------------------------------------------------------------------------------------------------------------------------------------------------------------------------|------------------------------------------------------------------------------------------------------------------------------------------------------------------------------------------------------------------------------------------------------------------------|----------------|---------------------------------|------------------------------|---------------------------------------------------------------------------------------------------------------------------------------------------------------------------------------------------------------------------------|
| Nordemar (1981) [Sweden] <sup>108</sup>            | RCT             | See above                                                                                                                                                                          | See above                                                                                                                                                                                                                                                              | 1) 23<br>p) 23 | 1) 56 (9)<br>p) 58 (10)         | 1) 19 (82.6)<br>p) 19 (82.6) | <b>Charity</b> (King Gustaf V 80 years fund, Swedish National Association against Rheumatism), <b>Government</b> (Swedish Medical Research Council)                                                                             |
| Stavropoulos-Kalinoglou (2013) [UK] <sup>109</sup> | NRT             | 1987 ACR RA criteria, sedentary lifestyle, stable medication for ≥3 months<br>Exclusions: joint surgery in preceding 6 months, amputation, co-morbidity incompatible with exercise | 1) 6-month individualised exercise intervention – exercised in semi-supervised manner. Exercise included treadmills, cycle, rowing and some muscle strengthening training<br>p) Received verbal advice about cardiovascular and arthritis related benefits of exercise | 1) 18<br>p) 18 | 1) 55.0 (9.8)<br>p) 52.8 (10.1) | 1) 14 (77.8)<br>p) 14 (77.8) | <b>Hospital</b> (Dudley Group of Hospitals R&D Directorate cardiovascular programme grant), <b>University</b> (Wolverhampton University), <b>Charity</b> (Arthritis Research Campaign)                                          |
| Lofgren (2018) [Sweden] <sup>110</sup>             | Single arm int. | Aged 18-75 years, HAQ<2, interested in participation, communicate in Swedish, not currently doing health enhancing physical activity                                               | Health enhancing physical activity – 3 main components: ≥2 weekly strength training session, physical activity of at least moderate intensity for 30 mins, group support sessions                                                                                      | 30             | 61 (10)                         | 27 (90.0)                    | <b>Government</b> (Swedish Research Council, Strategic Research Program in Health Care Science), <b>Charity</b> (§), <b>Industry</b> (Combine Sweden), <b>University</b> (National Postgraduate School of Health Care Sciences) |
| Nordgren (2015) [Sweden] <sup>111</sup>            | Single arm int. | Aged 18-75 years, HAQ≤2, expressed interest in organised activity, communicate in Swedish                                                                                          | Three main components of program: (1) moderate intensity physical activity for ≥30 mins on most days of the week, (2) ≥2 weekly 45 min circuit training session including muscle strength training and aerobic exercises, (3) biweekly support groups                  | 220            | 59 (8.8)                        | 81%                          | <b>Government</b> (Swedish Research Council, Strategic Research Program in Health Care Science), <b>Charity</b> (Swedish Rheumatism Foundation), <b>University</b> (National Postgraduate School of Health Care Sciences)       |

ACR = American College of Rheumatology, Health Assessment Questionnaire, int.= intervention, N = number, NRT = non-randomised trial, RA = rheumatoid arthritis, RCT = randomised controlled trial, SD = standard deviation, UK = United Kingdom

Table – Aerobic + muscle strengthening exercise (RA), description of included studies

| Author (date) [country]                                | Study design      | Inclusion criteria                                                                                                                                                                                                                                                                                                                                                                | Exposure detail                                                                                                                                                                                                                                              | N   | Age years, mean (SD) | N (%) female | Funders                                                               |
|--------------------------------------------------------|-------------------|-----------------------------------------------------------------------------------------------------------------------------------------------------------------------------------------------------------------------------------------------------------------------------------------------------------------------------------------------------------------------------------|--------------------------------------------------------------------------------------------------------------------------------------------------------------------------------------------------------------------------------------------------------------|-----|----------------------|--------------|-----------------------------------------------------------------------|
| Di Gioia (2013) [Italy] <sup>112</sup>                 | Single arm int.   | 1987 ACR RA criteria, non-response to DMARDs and treated with biologics for ≥12 months, DAS28>5.1<br>Exclusions: aged <18 years, RA functional class <II, intolerance to exercise, cognitive impairment, unstable anti-inflammatory/anti-rheumatic therapy, cachexia related to other diseases (cancer or HIV), instable medical conditions, pregnancy                            | Comprehensive rehabilitation provided by physicians, bio-engineers, occupational therapist, psychologist, exercise physiologist – included physical therapy with exercise aiming to improve aerobic fitness, muscle strength, mobility and balance           | 32  | 62.6 (13.4)          | 32 (100)     | <b>Not reported</b> – authors declare no conflicts of interest        |
| Strasser (2011) [Austria] <sup>113</sup>               | Single arm int. ‡ | 1987 ACR RA criteria, symptom duration >2 years, stable medication for 3 months<br>Exclusions: Participation in another study, cardiac arrhythmia, recent myocardial infarction, stroke, cancer, hypertension                                                                                                                                                                     | 6 month supervised combined strength and endurance training program                                                                                                                                                                                          | 20  | 59.3 (7.9)           | 19 (95.0)    | <b>Charity</b> (Jubiläumsfonds of the Austrian National Bank)         |
| van der Giesen (2010) [The Netherlands] <sup>114</sup> | Single arm int.   | RA patients<br>Exclusions: weight bearing prostheses or comorbidity                                                                                                                                                                                                                                                                                                               | Rheumatoid Arthritis Patients in Training (RAPIT) program – supervised aerobic and strengthening exercises, 2x per week                                                                                                                                      | 150 | 51 (12)              | 121 (80.7)   | <b>Charity</b> (Dutch Arthritis Association)                          |
| de Jong (2009) [The Netherlands] <sup>115</sup>        | Single arm int.   | 1987 ACR RA criteria, aged 20-70 years, stable DMARDs for 3 months, functional class I-III, ability to cycle on a home trainer, willingness to do bi-weekly exercise, living within 20km of assessment centre<br>Exclusions: inability to tolerate cardiorespiratory fitness training due to cardiac or lung disease, presence of one or more prostheses of weight-bearing joints | 1.25 hour duration sessions consisting of bike training, exercises circuits aiming to improve muscle strength and aerobic capacity, and a sports and games session                                                                                           | 71  | 56 (15)              | 61 (85.9)    | <b>Charity</b> (Vrienden van Sole Mio foundation)                     |
| Neuberger (1997) [USA] <sup>116</sup>                  | Single arm int.   | Diagnosis of RA, mentally competent, able to read/speak English, able to ambulate, no history of fibromyalgia or severe COPD, no involved in regular exercise program, rheumatologist's approval to joint study                                                                                                                                                                   | Low impact exercises for 1 hr, 3x per week. Class consisted of 4 phases: warm-up, strengthening, low-impact aerobic exercises, cool down.<br>High participation: 31-36 sessions<br>Moderate participation: 25-30 sessions<br>Low participation: ≤24 sessions | 25  | 55 (range: 30-71)    | 14 (56.0)    | <b>Government</b> (National Institute of Nursing Research of the NIH) |

‡ Strasser et al had a control group, but none of the outcomes relevant to this review were reported for this group

ACR = American College of Rheumatology, COPD = chronic obstructive pulmonary disorder, DAS28 = Disease Activity Score 28, HIV = human immunodeficiency virus, int.= intervention, N = number, NIH = National Institutes for Health Research, RA = rheumatoid arthritis, RCT = randomised controlled trial, SD = standard deviation, USA = United States of America



## Supplementary table 33 – Results from interventional studies of aerobic + muscle strengthening exercise in RA

Table – Aerobic + muscle strengthening exercise (RA), results and quality assessment

| Outcome (outcome measure) | Study (date) [study type]                                   | Standardised result, SMD (95% CI) unless otherwise stated                                                                 | Natural result                                                                                                                                                  | AMSTAR2 quality | Rand. Seq. | Alloc. Conc. | Blind. Part. | Blind. Asses. |
|---------------------------|-------------------------------------------------------------|---------------------------------------------------------------------------------------------------------------------------|-----------------------------------------------------------------------------------------------------------------------------------------------------------------|-----------------|------------|--------------|--------------|---------------|
| Pain                      | Durcan (2014) [RCT] <sup>89</sup>                           | <u>Exercise vs control at 12 weeks</u><br>SMD -0.78 (-1.24, -0.32)                                                        | <u>Pain, BL / 12 weeks, mean (SD)</u><br>Exercise: 29 (21.5) / 21 (18)<br>Control: 41.4 (25.5) / 39.8 (29.3)                                                    |                 | L          | H/UC         | H/UC         | H/UC          |
|                           | Flint-Wagner (2009) [RCT] <sup>93</sup>                     | <u>Exercise vs control, change BL-16 weeks</u><br>SMD -0.75 (-1.63, 0.13)                                                 | <u>Pain VAS, change BL-16 weeks, mean (SD)</u><br>Exercise: -14.8 (19.2)<br>Control: -0.13 (20.1), p=0.07                                                       |                 | H/UC       | H/UC         | H/UC         | H/UC          |
|                           | Neuberger (2007) [RCT] <sup>95</sup>                        | <u>Group exercise vs control</u><br>SMD -0.09 (-0.42, 0.24)<br><u>Home exercise vs control</u><br>SMD -0.05 (-0.37, 0.27) | <u>McGill Pain, BL / 12 weeks, mean (SD)</u><br>Group exercise: 4.7 (2.1) / 4.1 (2.2)<br>Home exercise: 3.9 (1.9) / 4.2 (1.9)<br>Control: 4.1 (2.3) / 4.3 (2.3) |                 | L          | H/UC         | H/UC         | L             |
|                           | Hakkinen (2004) [RCT] <sup>99</sup>                         | <u>Exercise vs control at 2 years</u><br>SMD -0.57 (-1.07, -0.06)                                                         | <u>Pain VAS, BL / 2 years / 5 years, mean (SD)</u><br>Exercise: 41.7 (19.5) / 13.7 (16.2) / 22.0 (19.9)<br>Control: 41.3 (27.1) / 24.9 (22.8) / 25.9 (24.2)     |                 | H/UC       | H/UC         | H/UC         | H/UC          |
|                           | Hakkinen (1999) [RCT] <sup>103</sup>                        | <u>Exercise vs control, change BL-12 months</u><br>SMD -0.11 (-0.59, 0.38)                                                | <u>Pain VAS, change BL – 12 months, mean (SD †)</u><br>Exercise: -20.4 (28.6)<br>Control: -17.2 (31.9)                                                          |                 | H/UC       | H/UC         | H/UC         | H/UC          |
|                           | Lyngberg (1994) [RCT] <sup>104</sup>                        | <u>Exercise vs control at 3 months</u><br>SMD -0.11 (-0.91, 0.69)                                                         | <u>Joint pain, BL / 3 months, mean (SD §)</u><br>Exercise: 12.3 (8.3) / 15.0 (8.0)<br>Control: 11.5 (8.0) / 16 (10.4)                                           |                 | H/UC       | H/UC         | H/UC         | L             |
|                           | Ekdahl (1990) [RCT] <sup>105</sup>                          |                                                                                                                           | <u>Pain VAS, change BL-6 weeks, mean</u><br>Dynamic: -0.5<br>Static: -0.2                                                                                       |                 | H/UC       | H/UC         | H/UC         | L             |
|                           | Bespoke meta-analysis including <sup>89;93;95;103;104</sup> | <u>Exercise vs control</u><br>SMD -0.25 (-0.52, 0.01), I <sup>2</sup> 44.8%                                               |                                                                                                                                                                 |                 |            |              |              |               |
|                           | Lofgren (2018) [single arm int.] <sup>110</sup>             |                                                                                                                           | <u>Pain, BL / 1 year / 2 years, mean (SD ‡)</u><br>11.7 (18.7) / 12.0 (17.1) / 8.7 (15.6)                                                                       |                 |            |              |              |               |
|                           | Nordgren (2015) [single arm int.] <sup>111</sup>            |                                                                                                                           | <u>Pain VAS, change BL-1 years, mean (SD ‡)</u><br>-3.54 (23.6)                                                                                                 |                 |            |              |              |               |
|                           | Strasser (2011) [single arm int.] <sup>113</sup>            |                                                                                                                           | <u>Pain VAS, BL / 6 months, mean (SD)</u><br>33.33 (21.60) / 25.86 (19.78)                                                                                      |                 |            |              |              |               |
|                           | Neuberger (1997) [single arm int.] <sup>116</sup>           |                                                                                                                           | <u>Pain, BL / 12 weeks, mean</u><br>5.09 / 4.50                                                                                                                 |                 |            |              |              |               |

† SD calculated from 95% CI, ‡ SD calculated from standard error, † mean (SD) estimated from median (interquartile range) using a published formula<sup>87</sup>, § mean (SD) estimated from median (range) using a published formula<sup>87</sup>

Alloc. Conc. = allocation concealment, AMSTAR2 = Assessing the Methodological Quality of Systematic Reviews, BL = baseline, Blind. Asses. = Blinded assessors, Blind. Part. = blinded participants, CI = confidence interval, H/UC = high / unclear risk of bias, L = low risk of bias, RA = rheumatoid arthritis, Rand. Seq. = random sequence generation, RCT = randomised controlled trial, SD = standard deviation, SMD = standardised mean difference, VAS = visual analogue scale

Table –Aerobic + muscle strengthening exercise (RA), results and quality assessment

| Outcome (outcome measure) | Study (date) [study type]               | Standardised result, SMD (95% CI) unless otherwise stated                  | Natural result                                                                                                                                         | AMSTAR2 quality | Rand. Seq. | Alloc. Conc. | Blind. Part. | Blind. Asses. |
|---------------------------|-----------------------------------------|----------------------------------------------------------------------------|--------------------------------------------------------------------------------------------------------------------------------------------------------|-----------------|------------|--------------|--------------|---------------|
| Function                  | Lange (2019) [RCT] <sup>88</sup>        | <u>Exercise vs control at 20 weeks</u><br>SMD -0.24 (-0.70, 0.22)          | <u>HAQ, change BL-20 weeks, mean (SD)</u><br>Exercise: -0.063 (0.16)<br>Control: -0.0097 (0.27)                                                        |                 | L          | L            | H/UC         | L             |
|                           | Durcan (2014) [RCT] <sup>89</sup>       | <u>Exercise vs control at 12 weeks</u><br>SMD -0.50 (-0.95, -0.04)         | <u>HAQ, BL / 12 weeks, mean (SD)</u><br>Exercise: 0.8 (0.4) / 0.5 (0.5)<br>Control: 0.9 (0.4) / 0.8 (0.7)                                              |                 | L          | H/UC         | H/UC         | H/UC          |
|                           | Breedland (2011) [RCT] <sup>90</sup>    | <u>Exercise vs control at 9 weeks</u><br>SMD -0.10 (-0.77, 0.58)           | <u>AIMS2 physical, BL / 9 weeks, mean (SD)</u><br>Exercise: 1.95 (1.22) / 1.27 (1.05)<br>Control: 1.51 (1.14) / 1.37 (1.05)                            |                 | L          | L            | H/UC         | L             |
|                           | Hurkmans (2010) [RCT] <sup>91</sup>     | <u>Exercise vs control, change BL-2 years</u><br>SMD -0.03 (-0.40, 0.35)   | <u>HAQ, change BL-2 years, mean (SD †)</u><br>Individualised exercise: -0.04 (0.40)<br>Exercise guidance: -0.03 (0.37)                                 |                 | L          | L            | H/UC         | L             |
|                           | Flint-Wagner (2009) [RCT] <sup>93</sup> | <u>Exercise vs control, change BL-16 weeks</u><br>SMD -0.75 (-1.63, 0.13)  | <u>HAQ, change BL-16 weeks, means (SD)</u><br>Exercise: -0.4 (0.4)<br>Control: -0.1 (0.4) p=0.17                                                       |                 | H/UC       | H/UC         | H/UC         | H/UC          |
|                           | Bulthuis (2007) [RCT] <sup>94</sup>     | <u>Exercise vs control at 3 weeks</u><br>SMD -0.28 (-0.68, 0.13)           | <u>HAQ, BL / 3 weeks / 52 weeks, mean (SD †)</u><br>Exercise: 1.47 (0.6) / 1.21 (0.8) / 0.77(0.6)<br>Control: 1.47 (0.6) / 1.41 (0.6) / 0.87 (0.5)     |                 | L          | L            | H/UC         | H/UC          |
|                           | van den Berg (2006) [RCT] <sup>92</sup> | <u>Exercise vs control, change BL-12 months</u><br>SMD -0.15 (-0.46, 0.17) | <u>HAQ, change BL-12 months, mean (SD †)</u><br>Individualised exercise: -0.09 (0.35)<br>Exercise guidance: -0.04 (0.34)                               |                 | L          | L            | H/UC         | L             |
|                           | Hakkinen (2004) [RCT] <sup>99</sup>     | <u>Exercise vs control at 2 years</u><br>SMD -0.21 (-0.71, 0.29)           | <u>HAQ, BL / 2 years / 5 years, mean (SD)</u><br>Exercise: 0.60 (0.53) / 0.13 (0.21) / 0.30 (0.42)<br>Control: 0.77 (0.55) / 0.35 (0.45) / 0.40 (0.51) |                 | H/UC       | H/UC         | H/UC         | H/UC          |
|                           | de Jong (2003) [RCT] <sup>101</sup>     | <u>Exercise vs control, change BL-24 months</u><br>SMD -0.20 (-0.43, 0.03) | <u>HAQ, change BL-24 months, mean (SD)</u><br>Exercise: 0.00 (0.4)<br>Control: 0.07 (0.3)                                                              |                 | L          | L            | H/UC         | L             |
|                           | Westby (2000) [RCT] <sup>102</sup>      | <u>Exercise vs control at 1 year</u><br>SMD -0.46 (-1.19, 0.27)            | <u>HAQ, BL / 1 year, mean (SD)</u><br>Exercise: 1.2 (0.6) / 1.0 (0.6)<br>Control: 1.5 (0.7) / 1.3 (0.7)                                                |                 | H/UC       | H/UC         | H/UC         | L             |
|                           | Hakkinen (1999) [RCT] <sup>103</sup>    | <u>Exercise vs control, change BL-12 months</u><br>SMD -0.10 (-0.59, 0.39) | <u>HAQ, change BL – 12 months, mean (SD †)</u><br>Exercise: -3.2 (4.0)<br>Control: -2.8 (4.0)                                                          |                 | H/UC       | H/UC         | H/UC         | H/UC          |

† SD calculated from 95% CI,

Alloc. Conc. = allocation concealment, AMSTAR2 = Assessing the Methodological Quality of Systematic Reviews, BL = baseline, Blind. Asses. = Blinded assessors, Blind. Part. = blinded participants, CI = confidence interval, H/UC = high / unclear risk of bias, L = low risk of bias, RA = rheumatoid arthritis, RADAI = Rheumatoid Arthritis Disease Activity Index, Rand. Seq. = random sequence generation, RCT = randomised controlled trial, SD = standard deviation, SMD = standardised mean difference

Table –Aerobic + muscle strengthening exercise (RA), results and quality assessment

| Outcome (outcome measure) | Study (date) [study type]                                      | Standardised result, SMD (95% CI) unless otherwise stated                 | Natural result                                                                                                                                                                                                                                                                                                                                                                                                                                                                                                                                                                                                                                                                                                  | AMSTAR2 quality | Rand. Seq. | Alloc. Conc. | Blind. Part. | Blind. Asses. |
|---------------------------|----------------------------------------------------------------|---------------------------------------------------------------------------|-----------------------------------------------------------------------------------------------------------------------------------------------------------------------------------------------------------------------------------------------------------------------------------------------------------------------------------------------------------------------------------------------------------------------------------------------------------------------------------------------------------------------------------------------------------------------------------------------------------------------------------------------------------------------------------------------------------------|-----------------|------------|--------------|--------------|---------------|
| Function                  | Lyngberg (1994) [RCT] <sup>104</sup>                           | <u>Exercise vs control at 3 months</u><br>SMD -0.32 (-1.12, 0.49)         | <u>Fries Index, BL / 3 months, mean (SD §)</u><br>Exercise: 18.0 (7.3) / 15.8 (9.5)<br>Control: 16.8 (11.3) / 19.8 (15.0)                                                                                                                                                                                                                                                                                                                                                                                                                                                                                                                                                                                       |                 | H/UC       | H/UC         | H/UC         | L             |
|                           | Nordemar (1981) [RCT] <sup>108</sup>                           |                                                                           | <u>Activities of daily living, N can / cannot at follow-up after 8 years</u><br>Activities that did not differ: wash hair, wash face, intimate hygiene, wash feet, toilet, socks on-off, shirt on-off, trousers on-off, do up buttons, rise from lying to standing, walk on level group, eat with knife and fork, cook, wash dishes, make the bed, use scissors, pick up object from floor, write letter<br>Activities that did differ:<br>walk upstairs and downstairs: 1) 22 / 1; p) 13 / 8 p=0.007<br>go shopping: 1) 17 / 3; p) 13 / 9, p=0.06<br>clean house: 1) 18 / 3; p) 9 / 13, p=0.003<br>use public transport: 1) 17 / 5; p) 11 / 12, p=0.04<br>take object from shelf: 1) 23 / 0; p) 16 / 6 p=0.009 |                 | H/UC       | H/UC         | H/UC         | H/UC          |
|                           | Bespoke meta-analysis including <sup>88-90;92-94;101-104</sup> | <u>Exercise vs control</u><br>SMD -0.24 (-0.37, -0.11), I <sup>2</sup> 0% |                                                                                                                                                                                                                                                                                                                                                                                                                                                                                                                                                                                                                                                                                                                 |                 |            |              |              |               |
|                           | Stavropoulos-Kalinoglou (2013) [NRT] <sup>109</sup>            | <u>Exercise vs control at 3 months</u><br>SMD -1.09 (-1.79, -0.38)        | <u>HAQ, BL / 3 months / 6 months, mean (SD)</u><br>Exercise: 1.4 (0.8) / 1.0 (0.6) / 0.9 (0.6)<br>Control: 1.3 (0.7) / 1.6 (0.5) / 1.5 (0.6)                                                                                                                                                                                                                                                                                                                                                                                                                                                                                                                                                                    |                 |            |              |              |               |
|                           | Nordgren (2015) [single arm int.] <sup>111</sup>               |                                                                           | <u>HAQ, change BL-1 years, mean (SD †)</u><br>-0.20 (0.30)                                                                                                                                                                                                                                                                                                                                                                                                                                                                                                                                                                                                                                                      |                 |            |              |              |               |
|                           | Di Gioia (2013) [single arm int.] <sup>112</sup>               |                                                                           | <u>HAQ, BL / 9 months, mean (SD)</u><br>2.42 (0.43) / 2.19 (0.38)                                                                                                                                                                                                                                                                                                                                                                                                                                                                                                                                                                                                                                               |                 |            |              |              |               |
|                           | Strasser (2011) [single arm int.] <sup>113</sup>               |                                                                           | <u>HAQ, BL / 6 months, mean (SD)</u><br>1.23 (0.80) / 1.01 (0.67)                                                                                                                                                                                                                                                                                                                                                                                                                                                                                                                                                                                                                                               |                 |            |              |              |               |
|                           | van der Giesen (2010) [single arm int.] <sup>114</sup>         |                                                                           | <u>HAQ, change BL-12 months, mean (SD †)</u><br>-0.06 (0.75)                                                                                                                                                                                                                                                                                                                                                                                                                                                                                                                                                                                                                                                    |                 |            |              |              |               |
|                           | de Jong (2009) [single arm int.] <sup>115</sup>                |                                                                           | <u>MACTAR, BL / 18 months, median (net IQR)</u><br>Exercise: 58 (12.2) / 59 (9.0)                                                                                                                                                                                                                                                                                                                                                                                                                                                                                                                                                                                                                               |                 |            |              |              |               |

† SD calculated from 95% CI, ‡ SD calculated from standard error, § mean (SD) estimated from median (range) using a published formula<sup>87</sup>

Alloc. Conc. = allocation concealment, AMSTAR2 = Assessing the Methodological Quality of Systematic Reviews, BL = baseline, Blind. Asses. = Blinded assessors, Blind. Part. = blinded participants, CI = confidence interval, DAS = Disease Activity Score, H/UC = high / unclear risk of bias, IQR = interquartile range, L = low risk of bias, MACTAR = McMasters Toronto Patient Preference Disability Questionnaire, NRT = non-randomised trial, RA = rheumatoid arthritis, Rand. Seq. = random sequence generation, RCT = randomised controlled trial, SD = standard deviation, SMD = standardised mean difference

Table –Aerobic + muscle strengthening exercise (RA), results and quality assessment

| Outcome (outcome measure) | Study (date) [study type]                              | Standardised result, SMD (95% CI) unless otherwise stated                  | Natural result                                                                                                                                   | AMSTAR2 quality | Rand. Seq. | Alloc. Conc. | Blind. Part. | Blind. Asses. |
|---------------------------|--------------------------------------------------------|----------------------------------------------------------------------------|--------------------------------------------------------------------------------------------------------------------------------------------------|-----------------|------------|--------------|--------------|---------------|
| Disease activity          | van den Berg (2006) [RCT] <sup>92</sup>                | <u>Exercise vs control, change BL-12 months</u><br>SMD 0.09 (-0.22, 0.40)  | <u>DAS28, change BL-12 months, mean (SD †)</u><br>Individualised exercise: -0.4 (1.2)<br>Exercise guidance: -0.5 (1.1)                           |                 | L          | L            | H/UC         | L             |
|                           | Hakkinen (2004) [RCT] <sup>99</sup>                    | <u>Exercise vs control at 2 years</u><br>SMD -0.42 (-0.92, 0.09)           | <u>DAS28, BL / 2 years / 5 years, mean (SD)</u><br>Exercise: 4.4 (1.1) / 2.2 (1.2) / 2.3 (1.0)<br>Control: 9 [sic] (1.1) / 2.7 (1.2) / 3.0 (1.2) |                 | H/UC       | H/UC         | H/UC         | H/UC          |
|                           | de Jong (2003) [RCT] <sup>101</sup>                    | <u>Exercise vs control, change BL-12 months</u><br>SMD -0.17 (-0.40, 0.05) | <u>DAS4, change BL-24 months, mean (SD)</u><br>Exercise: -0.9 (1.2)<br>Control: -0.7 (1.1)                                                       |                 | L          | L            | H/UC         | L             |
|                           | Hakkinen (1999) [RCT] <sup>103</sup>                   | <u>Exercise vs control, change BL-12 months</u><br>SMD -0.05 (-0.53, 0.44) | <u>DAS28, change BL – 12 months, mean (SD †)</u><br>Exercise: -2.2 (1.2)<br>Control: -2.0 (5.9)                                                  |                 | H/UC       | H/UC         | H/UC         | H/UC          |
|                           | Bespoke meta-analysis including <sup>92;101;103</sup>  | <u>Exercise vs control</u><br>SMD -0.08 (-0.25, 0.09), I <sup>2</sup> 0%   |                                                                                                                                                  |                 |            |              |              |               |
|                           | Stavropoulos-Kalinoglou (2013) [NRT] <sup>109</sup>    | <u>Exercise vs control at 3 months</u><br>SMD -0.28 (-0.94, 0.37)          | <u>DAS28, BL / 3 months / 6 months, mean (SD)</u><br>Exercise: 3.5 (1.2) / 2.9 (0.8) / 2.7 (0.7)<br>Control: 3.1 (1.2) / 3.1 (0.6) / 3.2 (0.9)   |                 |            |              |              |               |
|                           | Di Gioia (2013) [single arm int.] <sup>112</sup>       |                                                                            | <u>DAS28, BL / 9 months, mean (SD)</u><br>5.98 (0.5) / 5.3 (0.69)                                                                                |                 |            |              |              |               |
|                           | Strasser (2011) [single arm int.] <sup>113</sup>       |                                                                            | <u>DAS28, BL / 6 months, mean (SD)</u><br>3.57 (1.10) / 3.12 (1.27)                                                                              |                 |            |              |              |               |
|                           | van der Giesen (2010) [single arm int.] <sup>114</sup> |                                                                            | <u>RADAI, change BL-12 months, mean (SD †)</u><br>-0.4 (3.4)                                                                                     |                 |            |              |              |               |
|                           | de Jong (2009) [single arm int.] <sup>115</sup>        |                                                                            | <u>DAS4, BL / 18 months, median (net IQR)</u><br>Exercise: 2.59 (2.3) / 2.77 (1.09)                                                              |                 |            |              |              |               |

† SD calculated from 95% CI

Alloc. Conc. = allocation concealment, AMSTAR2 = Assessing the Methodological Quality of Systematic Reviews, BL = baseline, Blind. Asses. = Blinded assessors, Blind. Part. = blinded participants, CI = confidence interval, DAS = Disease Activity Score, H/UC = high / unclear risk of bias, IQR = interquartile range, L = low risk of bias, NRT = non-randomised trial, RA = rheumatoid arthritis, RADAI = Rheumatoid Arthritis Disease Activity Index, Rand. Seq. = random sequence generation, RCT = randomised controlled trial, SD = standard deviation, SMD = standardised mean difference

Table –Aerobic + muscle strengthening exercise (RA), results and quality assessment

| Outcome (outcome measure) | Study (date) [study type]                          | Standardised result, SMD (95% CI) unless otherwise stated                                                                  | Natural result                                                                                                                                                                           | AMSTAR2 quality | Rand. Seq. | Alloc. Conc. | Blind. Part. | Blind. Asses. |
|---------------------------|----------------------------------------------------|----------------------------------------------------------------------------------------------------------------------------|------------------------------------------------------------------------------------------------------------------------------------------------------------------------------------------|-----------------|------------|--------------|--------------|---------------|
| Tender joints             | Neuberger (2007) [RCT] <sup>95</sup>               | <u>Group exercise vs control</u><br>SMD -0.15 (-0.48, 0.18)<br><u>Home exercise vs control</u><br>SMD -0.46 (-0.78, -0.14) | <u>Tender joint count (164), BL / 12 weeks, mean (SD)</u><br>Group exercise: 32.2 (29.1) / 31.0 (29.2)<br>Home exercise: 29.0 (23.1) / 23.7 (23.1)<br>Control: 37.1 (25.1) / 35.1 (26.7) |                 | L          | H/UC         | H/UC         | L             |
|                           | Di Gioia (2013) [single arm int.] <sup>112</sup>   |                                                                                                                            | <u>Tender joint count, BL / 9 months, mean (SD)</u><br>18.63 (3.4) / 11.69 (3.47)                                                                                                        |                 |            |              |              |               |
| Swollen joints            | Westby (2000) [RCT] <sup>102</sup>                 | <u>Exercise vs control at 1 year</u><br>SMD -1.05 (-1.82, -0.28)                                                           | <u>Active joint count, BL / 1 year, mean (SD)</u><br>Exercise: 17.5 (12.3) / 16.2 (12.3)<br>Control: 30.4 (12.5) / 31 (15.5)                                                             |                 | H/UC       | H/UC         | H/UC         | L             |
|                           | Lyngberg (1988) [RCT] <sup>106</sup>               |                                                                                                                            | <u>Swollen joint count, BL / 16 weeks, mean</u><br>Exercise: 77 / 56<br>Control: 42 / 49                                                                                                 |                 | L          | H/UC         | H/UC         | L             |
|                           | Nordemar (1981) [RCT] <sup>107</sup>               | <u>Exercise vs control, change BL-8 years</u><br>SMD -1.46 (-2.11, -0.80)                                                  | <u>Lansbury's index, change BL-8 years, mean (SD)</u><br>Exercise: -35 (21)<br>Control: -9 (14)                                                                                          |                 | H/UC       | H/UC         | H/UC         | H/UC          |
|                           | Bespoke meta-analysis including <sup>102,107</sup> | <u>Exercise vs control</u><br>SMD -1.53 (-2.46, -0.61), I <sup>2</sup> 68%                                                 |                                                                                                                                                                                          |                 |            |              |              |               |
|                           | Di Gioia (2013) [single arm int.] <sup>112</sup>   |                                                                                                                            | <u>Swollen joint count, BL / 9 months, mean (SD)</u><br>13.13 (3.96) / 6.94 (2.9)                                                                                                        |                 |            |              |              |               |
| Stiffness                 | Durcan (2014) [RCT] <sup>89</sup>                  | <u>Exercise vs control at 12 weeks</u><br>SMD -0.65 (-1.11, -0.20)                                                         | <u>Stiffness, BL / 12 weeks, mean (SD)</u><br>Exercise: 32 (23) / 24 (24)<br>Control: 43.8 (23.7) / 42.4 (32.2)                                                                          |                 | L          | H/UC         | H/UC         | H/UC          |
| Morning stiffness         | Hakkinen (2004) [RCT] <sup>99</sup>                | <u>Exercise vs control at 2 years</u><br>SMD -0.62 (-1.13, -0.11)                                                          | <u>Morning stiffness, BL / 2 years / 5 years, mean (SD)</u><br>Exercise: 72.4 (54.5) / 16.3 (21.3) / 32.7 (55.2)<br>Control: 81.5 (90.4) / 37.7 (43.8) / 34.9 (49.9)                     |                 | H/UC       | H/UC         | H/UC         | H/UC          |
| QoL                       | Hurkmans (2010) [RCT] <sup>91</sup>                | <u>Exercise vs control, change BL-2 years</u><br>SMD -0.33 (-0.70, 0.05)                                                   | <u>RAQoL, change BL-2 years, mean (SD †)</u><br>Individualised exercise: -1.3 (5.0)<br>Exercise guidance: 0.2 (4.1)                                                                      |                 | L          | L            | H/UC         | L             |
|                           | van den Berg (2006) [RCT] <sup>92</sup>            | <u>Exercise vs control, change BL-12 months</u><br>SMD -0.17 (-0.48, 0.14)                                                 | <u>RAQoL, change BL-12 months, mean (SD †)</u><br>Individualised exercise: -1.3 (4.6)<br>Exercise guidance: -0.6 (3.6)                                                                   |                 | L          | L            | H/UC         | L             |
|                           | Nordgren (2015) [single arm int.] <sup>111</sup>   |                                                                                                                            | <u>EQ5D, change BL-1 years, mean (SD ‡)</u><br>5.29 (19.1)                                                                                                                               |                 |            |              |              |               |

† SD calculated from 95% CI, ‡ SD calculated from standard error

Alloc. Conc. = allocation concealment, AMSTAR2 = Assessing the Methodological Quality of Systematic Reviews, BL = baseline, Blind. Asses. = Blinded assessors, Blind. Part. = blinded participants, CI = confidence interval, H/UC = high / unclear risk of bias, L = low risk of bias, QoL = quality of life, RA = rheumatoid arthritis, Rand. Seq. = random sequence generation, RAQoL = Rheumatoid Arthritis Quality of Life Index, RCT = randomised controlled trial, SD = standard deviation, SMD = standardised mean difference

Table –Aerobic + muscle strengthening exercise (RA), results and quality assessment

| Outcome (outcome measure) | Study (date) [study type]                         | Standardised result, SMD (95% CI) unless otherwise stated                                                                 | Natural result                                                                                                                                                                                                                                                                                                                                                                                     | AMSTAR2 quality | Rand. Seq. | Alloc. Conc. | Blind. Part. | Blind. Asses. |
|---------------------------|---------------------------------------------------|---------------------------------------------------------------------------------------------------------------------------|----------------------------------------------------------------------------------------------------------------------------------------------------------------------------------------------------------------------------------------------------------------------------------------------------------------------------------------------------------------------------------------------------|-----------------|------------|--------------|--------------|---------------|
| Patient global            | Di Gioia (2013) [single arm int.] <sup>112</sup>  |                                                                                                                           | <u>Patient global, BL / 9 months, mean (SD)</u><br>29.44 (9.08) / 48.39 (6.3)                                                                                                                                                                                                                                                                                                                      |                 |            |              |              |               |
|                           | Strasser (2011) [single arm int.] <sup>113</sup>  |                                                                                                                           | <u>Patient global VAS, BL / 6 months, mean (SD)</u><br>36.33 (21.25) / 25.20 (21.44)                                                                                                                                                                                                                                                                                                               |                 |            |              |              |               |
|                           | Neuberger (1997) [single arm int.] <sup>116</sup> |                                                                                                                           | <u>Arthritis impact, BL / 12 weeks, mean</u><br>3.27 / 2.51                                                                                                                                                                                                                                                                                                                                        |                 |            |              |              |               |
| Fatigue                   | Durcan (2014) [RCT] <sup>89</sup>                 | <u>Exercise vs control at 12 weeks</u><br>SMD -0.52 (-0.97, -0.06)                                                        | <u>Fatigue severity scale, BL / 12 weeks, mean (SD)</u><br>Exercise: 29.5 (17.8) / 21.4 (18.8)<br>Control: 30.5 (15.4) / 30.6 (16.8)                                                                                                                                                                                                                                                               |                 | L          | H/UC         | H/UC         | H/UC          |
|                           | Neuberger (2007) [RCT] <sup>95</sup>              | <u>Group exercise vs control</u><br>SMD -0.02 (-0.35, 0.31)<br><u>Home exercise vs control</u><br>SMD -0.16 (-0.48, 0.16) | <u>Global fatigue, BL / 12 weeks, mean (SD)</u><br>Group exercise: 24.9 (10.3) / 20.7 (11.6)<br>Home exercise: 20.1 (10.2) / 19.2 (10.6)<br>Control: 21.9 (9.8) / 20.9 (11.2)                                                                                                                                                                                                                      |                 | L          | H/UC         | H/UC         | L             |
|                           | Nordemar (1981) [RCT] <sup>108</sup>              |                                                                                                                           | <u>Fatigue, yes / no after 8 years</u><br>Exercise: 12 / 10<br>Control: 16 / 7, p = non-significant                                                                                                                                                                                                                                                                                                |                 | H/UC       | H/UC         | H/UC         | H/UC          |
|                           | Nordgren (2015) [single arm int.] <sup>111</sup>  |                                                                                                                           | <u>Fatigue VAS, change BL-1 years, mean (SD †)</u><br>-2.29 (23.3)                                                                                                                                                                                                                                                                                                                                 |                 |            |              |              |               |
|                           | Neuberger (1997) [single arm int.] <sup>116</sup> |                                                                                                                           | <u>Multidimensional assessment of fatigue, BL / 12 weeks, mean</u><br><u>Distress:</u><br>High: 3.25 / 2.63<br>Mod: 2.69 / 2.13<br>Low: 2.11 / 2.89<br><u>Severity:</u><br>High: 4.03 / 3.38<br>Mod: 3.78 / 2.69<br>Low: 3.78 / 4.22<br><u>Timing:</u><br>High: 2.06 / 1.81<br>Mod: 2.22 / 1.44<br>Low: 2.03 / 2.28<br><u>Global:</u><br>High: 19.9 / 17.1<br>Mod: 18.5 / 13.7<br>Low: 17.5 / 19.4 |                 |            |              |              |               |

† SD calculated from standard error

Alloc. Conc. = allocation concealment, AMSTAR2 = Assessing the Methodological Quality of Systematic Reviews, BL = baseline, Blind. Asses. = Blinded assessors, Blind. Part. = blinded participants, CI = confidence interval, H/UC = high / unclear risk of bias, L = low risk of bias, RA = rheumatoid arthritis, Rand. Seq. = random sequence generation, RCT = randomised controlled trial, SD = standard deviation, SMD = standardised mean difference, VAS = visual analogue scale

Table –Aerobic + muscle strengthening exercise (RA), results and quality assessment

| Outcome (outcome measure) | Study (date) [study type]                              | Standardised result, SMD (95% CI) unless otherwise stated                                                                | Natural result                                                                                                                                                                                                                              | AMSTAR2 quality | Rand. Seq. | Alloc. Conc. | Blind. Part. | Blind. Asses. |
|---------------------------|--------------------------------------------------------|--------------------------------------------------------------------------------------------------------------------------|---------------------------------------------------------------------------------------------------------------------------------------------------------------------------------------------------------------------------------------------|-----------------|------------|--------------|--------------|---------------|
| Anxiety                   | van der Giesen (2010) [single arm int.] <sup>114</sup> |                                                                                                                          | <u>HADS-A, change BL-12 months, mean (SD †)</u><br>0.3 (4.4)                                                                                                                                                                                |                 |            |              |              |               |
| Depression                | Breedland (2011) [RCT] <sup>90</sup>                   | <u>Exercise vs control at 9 weeks</u><br>SMD -0.12 (-0.79, 0.56)                                                         | <u>AIMS2 psychological, BL / 9 weeks, mean (SD)</u><br>Exercise: 2.47 (1.78) / 2.12 (1.58)<br>Control: 2.21 (1.27) / 2.29 (1.31)                                                                                                            |                 | L          | L            | H/UC         | L             |
|                           | Neuberger (2007) [RCT] <sup>95</sup>                   | <u>Group exercise vs control</u><br>SMD 0.22 (-0.12, 0.55)<br><u>Home exercise vs control</u><br>SMD -0.14 (-0.46, 0.18) | <u>CES-D, BL / 12 weeks, mean (SD)</u><br>Group exercise: 14.8 (8.1) / 13.7 (9.5)<br>Home exercise: 10.6 (7.7) / 10.5 (8.2)<br>Control: 12.9 (8.6) / 11.7 (9.0)                                                                             |                 | L          | H/UC         | H/UC         | L             |
|                           | Bespoke meta-analysis including <sup>90,95</sup>       | <u>Exercise vs control</u><br>SMD 0.01 (-0.24, 0.26)                                                                     |                                                                                                                                                                                                                                             |                 |            |              |              |               |
|                           | van der Giesen (2010) [single arm int.] <sup>114</sup> |                                                                                                                          | <u>HADS-D, change BL-12 months, mean (SD †)</u><br>-0.4 (3.7)                                                                                                                                                                               |                 |            |              |              |               |
| Psychological distress    | de Jong (2003) [RCT] <sup>101</sup>                    | <u>Exercise vs control, change BL-24 months</u><br>SMD -0.32 (-0.55, -0.09)                                              | <u>HADS total, change BL-24 months, mean (SD)</u><br>Exercise: -1.2 (4.1)<br>Control: 0.1 (4.0)                                                                                                                                             |                 | L          | L            | H/UC         | L             |
| Self-efficacy             | Breedland (2011) [RCT] <sup>90</sup>                   | <u>Exercise vs control at 9 weeks</u><br>Pain + symptoms: SMD -0.10 (-0.78, 0.57)<br>Function: SMD 0.01 (-0.66, 0.69)    | <u>ASES, BL / 9 weeks, mean (SD)</u><br><u>Pain + symptoms</u><br>Exercise: 3.12 (0.95) / 3.54 (0.88)<br>Control: 3.34 (0.80) / 3.63 (0.85)<br><u>Function</u><br>Exercise: 4.03 (0.84) / 4.32 (0.74)<br>Control: 4.21 (0.73) / 4.31 (0.87) |                 | L          | L            | H/UC         | L             |

† SD calculated from 95% CI

AIMS2 = Arthritis Impact Measurement Scales, Alloc. Conc. = allocation concealment, AMSTAR2 = Assessing the Methodological Quality of Systematic Reviews, ASES = Arthritis Self-Efficacy Scale, BL = baseline, Blind. Asses. = Blinded assessors, Blind. Part. = blinded participants, CES-D = Centre for Epidemiologic Studies – Depression Scale, CI = confidence interval, H/UC = high / unclear risk of bias, HADS = Hospital Anxiety and Depression Scale, L = low risk of bias, RA = rheumatoid arthritis, Rand. Seq. = random sequence generation, RCT = randomised controlled trial, SD = standard deviation, SMD = standardised mean difference

Table –Aerobic + muscle strengthening exercise (RA), results and quality assessment

| Outcome (outcome measure) | Study (date) [study type]                                 | Standardised result, SMD (95% CI) unless otherwise stated                                                                | Natural result                                                                                                                                                      | AMSTAR2 quality | Rand. Seq. | Alloc. Conc. | Blind. Part. | Blind. Asses. |
|---------------------------|-----------------------------------------------------------|--------------------------------------------------------------------------------------------------------------------------|---------------------------------------------------------------------------------------------------------------------------------------------------------------------|-----------------|------------|--------------|--------------|---------------|
| CRP                       | Neuberger (2007) [RCT] <sup>95</sup>                      | <u>Group exercise vs control</u><br>SMD 0.08 (-0.25, 0.41)<br><u>Home exercise vs control</u><br>SMD -0.09 (-0.41, 0.23) | <u>CRP, BL / 12 weeks, mean (SD)</u><br>Group exercise: 1.3 (2.0) / 1.1 (1.4)<br>Home exercise: 1.3 (1.6) / 0.9 (1.0)<br>Control: 1.3 (1.8) / 1.0 (1.2)             |                 | L          | H/UC         | H/UC         | L             |
|                           | Stavropoulos-Kalinoglou (2013) [NRT] <sup>109</sup>       | <u>Exercise vs control at 3 months</u><br>SMD -1.84 (-2.62, -1.05)                                                       | <u>CRP, BL / 3 months / 6 months, mean (SD §)</u><br>Exercise: 5.5 (2.7) / 3.3 (0.3) / 4.8 (1.4)<br>Control: 4.2 (1.3) / 5.8 (1.9) / 8.0 (3.3)                      |                 |            |              |              |               |
|                           | Strasser (2011) [single arm int.] <sup>113</sup>          |                                                                                                                          | <u>CRP, BL / 6 months, mean (SD)</u><br>2.85 (6.38) / 1.32 (2.05)                                                                                                   |                 |            |              |              |               |
| ESR                       | Neuberger (2007) [RCT] <sup>95</sup>                      | <u>Group exercise vs control</u><br>SMD 0.22 (-0.11, 0.55)<br><u>Home exercise vs control</u><br>SMD -0.22 (-0.54, 0.10) | <u>ESR, BL / 12 weeks, mean (SD)</u><br>Group exercise: 32.5 (22.7) / 32.0 (24.2)<br>Home exercise: 23.7 (25.6) / 21.9 (21.9)<br>Control: 27.6 (24.1) / 26.8 (23.4) |                 | L          | H/UC         | H/UC         | L             |
|                           | Hakkinen (2004) [RCT] <sup>99</sup>                       | <u>Exercise vs control at 2 years</u><br>SMD -0.42 (-0.93, 0.08)                                                         | <u>ESR, BL / 2 years / 5 years, mean (SD)</u><br>Exercise: 24.4 (17.8) / 10.9 (9.8) / 9.9 (12.1)<br>Control: 24.8 (15.7) / 15.4 (11.5) / 13.8 (12.1)                |                 | H/UC       | H/UC         | H/UC         | H/UC          |
|                           | Westby (2000) [RCT] <sup>102</sup>                        | <u>Exercise vs control at 1 year</u><br>SMD -0.64 (-1.38, 0.10)                                                          | <u>ESR, BL / 1 year, mean (SD)</u><br>Exercise: 15.8 (19.5) / 12.5 (12.2)<br>Control: 19.3 (11.1) / 21.8 (16.3)                                                     |                 | H/UC       | H/UC         | H/UC         | L             |
|                           | Hakkinen (1999) [RCT] <sup>103</sup>                      | <u>Exercise vs control, change BL-12 months</u><br>SMD -0.35 (-0.84, 0.14)                                               | <u>ESR, change BL – 12 months, mean (SD †)</u><br>Exercise: -15.5 (15.9)<br>Control: -9 (20.5)                                                                      |                 | H/UC       | H/UC         | H/UC         | H/UC          |
|                           | Lyngberg (1994) [RCT] <sup>104</sup>                      | <u>Exercise vs control at 3 months</u><br>SMD 0.06 (-0.74, 0.86)                                                         | <u>ESR, BL / 3 months, mean (SD §)</u><br>Exercise: 41.3 (29.1) / 26.5 (17.7)<br>Control: 22 (12.8) / 25.5 (13.5)                                                   |                 | H/UC       | H/UC         | H/UC         | L             |
|                           | Nordemar (1981) [RCT] <sup>107</sup>                      | <u>Exercise vs control, change BL-8 years</u><br>SMD 0.06 (-0.52, 0.64)                                                  | <u>ESR, change BL-8 years, mean (SD)</u><br>Exercise: 43 (21)<br>Control: 42 (10)                                                                                   |                 | H/UC       | H/UC         | H/UC         | H/UC          |
|                           | Bespoke meta-analysis including <sup>95;102-104;107</sup> | <u>Exercise vs control</u><br>SMD -0.10 (-0.35, 0.14), I <sup>2</sup> 34.1%                                              |                                                                                                                                                                     |                 |            |              |              |               |

† SD calculated from 95% CI, § mean (SD) estimated from median (range) using a published formula<sup>87</sup>

Alloc. Conc. = allocation concealment, AMSTAR2 = Assessing the Methodological Quality of Systematic Reviews, BL = baseline, Blind. Asses. = Blinded assessors, Blind. Part. = blinded participants, CI = confidence interval, CRP = C-reactive protein, ESR = erythrocyte sedimentation rate, H/UC = high / unclear risk of bias, L = low risk of bias, NRT = non-randomised trial, RA = rheumatoid arthritis, Rand. Seq. = random sequence generation, RCT = randomised controlled trial, SD = standard deviation, SMD = standardised mean difference



Table –Aerobic + muscle strengthening exercise (RA), results and quality assessment

| Outcome (outcome measure) | Study (date) [study type]            | Standardised result, SMD (95% CI) unless otherwise stated             | Natural result                                                                                                                                                                                                                                                                                                                                                                                                                                                                                                                                                                                                                                                                                                                                                                                                                                                                                                                                                                                                                                                                                             | AMSTAR2 quality | Rand. Seq. | Alloc. Conc. | Blind. Part. | Blind. Asses. |
|---------------------------|--------------------------------------|-----------------------------------------------------------------------|------------------------------------------------------------------------------------------------------------------------------------------------------------------------------------------------------------------------------------------------------------------------------------------------------------------------------------------------------------------------------------------------------------------------------------------------------------------------------------------------------------------------------------------------------------------------------------------------------------------------------------------------------------------------------------------------------------------------------------------------------------------------------------------------------------------------------------------------------------------------------------------------------------------------------------------------------------------------------------------------------------------------------------------------------------------------------------------------------------|-----------------|------------|--------------|--------------|---------------|
| Radiological damage       | Munneke (2005) [RCT] <sup>96</sup>   | <u>Larsen score, change BL-2 years</u><br>SMD 0.06 (-0.18, 0.29)      | <u>Larsen score, change BL-2 years, mean (SD±)</u><br>Exercise: 1.3 (9.7)<br>Control: 0.8 (8.6)<br><u>Shoulder damage, incidence (%) (relative risk (95%CI))</u><br>without BL damage: 1) 5, p) 5 (RR 1.0 (0.4, 2.2)<br>with BL damage: 1) 27; p) 10 (RR 2.7 (1.1, 7.0)<br><u>Elbow, incidence (%) (relative risk (95%CI))</u><br>without BL damage: 1) 6, p) 4 (RR 1.6 (0.7, 3.8))<br>with BL damage: 1) 20 p) 16 (RR 1.3 (0.6, 2.5))<br><u>Hip, incidence (%) (relative risk (95%CI))</u><br>without BL damage: 1) 2, p) 1 (RR 1.5 (0.3, 6.4))<br>with BL damage: 1) 20; p) 11 (RR 1.8 (0.6, 4.7))<br><u>Knee, incidence (%) (relative risk (95%CI))</u><br>without BL damage: 1) 11, p) 10 (RR 1.1 (0.6, 1.9))<br>with BL damage: 1) 24 p) 19 (RR 1.3 (0.7, 2.1))<br><u>Ankle, incidence (%) (relative risk (95%CI))</u><br>without BL damage: 1) 4, p) 4 (RR 1.1 (0.5, 2.6))<br>with BL damage: 1) 19; p) 19 (RR 1.0 (0.4, 2.3))<br><u>Subtalar, incidence (%) (relative risk (95%CI))</u><br>without BL damage: 1) 2; p) 1 (RR 1.2 (0.3, 4.6))<br>with BL damage: 1) 40; p) 4 (RR 10 (1.3, 79 [sic])) |                 | L          | L            | H/UC         | L             |
|                           | de Jong (2004) [RCT] <sup>98</sup>   |                                                                       | <u>Larsen score, mean difference between exercise and control's change score from BL-2 years, mean (95% CI)</u><br>-2.1 (-4.2, 0.2)                                                                                                                                                                                                                                                                                                                                                                                                                                                                                                                                                                                                                                                                                                                                                                                                                                                                                                                                                                        |                 | L          | L            | H/UC         | L             |
|                           | Hakkinen (2004) [RCT] <sup>100</sup> | <u>Exercise vs control at 2 years</u><br>SMD -0.81 (-1.33, -0.29)     | <u>Larsen score, BL / 2 years / 5 years, mean (SD ±)</u><br>Exercise: 0.3 (0.8) / 0.7 (1.6) / 1.0 (2.3)<br>Control: 1.0 (2.3) / 2.3 (2.3) / 2.0 (3.1)                                                                                                                                                                                                                                                                                                                                                                                                                                                                                                                                                                                                                                                                                                                                                                                                                                                                                                                                                      |                 |            |              |              |               |
|                           | de Jong (2003) [RCT] <sup>101</sup>  | <u>Exercise vs control, change BL-24 months</u><br>0.00 (-0.23, 0.23) | <u>Larsen score, change BL-24 months, mean (SD)</u><br>Exercise: 0.0 (1.0)<br>Control: 0.0 (1.0)                                                                                                                                                                                                                                                                                                                                                                                                                                                                                                                                                                                                                                                                                                                                                                                                                                                                                                                                                                                                           |                 | L          | L            | H/UC         | L             |

‡ mean (SD) estimated from median (interquartile range) using a published formula<sup>87</sup>

Alloc. Conc. = allocation concealment, AMSTAR2 = Assessing the Methodological Quality of Systematic Reviews, BL = baseline, Blind. Asses. = Blinded assessors, Blind. Part. = blinded participants, CI = confidence interval, H/UC = high / unclear risk of bias, L = low risk of bias, RA = rheumatoid arthritis, Rand. Seq. = random sequence generation, RCT = randomised controlled trial, SD = standard deviation, SMD = standardised mean difference

Table –Aerobic + muscle strengthening exercise (RA), results and quality assessment

| Outcome (outcome measure) | Study (date) [study type]                                 | Standardised result, SMD (95% CI) unless otherwise stated                                                                 | Natural result                                                                                                                                                       | AMSTAR2 quality | Rand. Seq. | Alloc. Conc. | Blind. Part. | Blind. Asses. |
|---------------------------|-----------------------------------------------------------|---------------------------------------------------------------------------------------------------------------------------|----------------------------------------------------------------------------------------------------------------------------------------------------------------------|-----------------|------------|--------------|--------------|---------------|
| Radiological damage       | Nordemar (1981) [RCT] <sup>107</sup>                      | <u>Exercise vs control at 8 years</u><br>SMD -0.52 (-1.11, 0.07)                                                          | <u>Larsen score, BL / 8 years, mean (SD)</u><br>Exercise: 6.2 (5.9) / 10.2 (7.2)<br>Control: 6.7 (5.4) / 13.6 (5.8)                                                  |                 | H/UC       | H/UC         | H/UC         | H/UC          |
|                           | Bespoke meta-analysis including <sup>96;100;101;107</sup> | <u>Exercise vs control</u><br>SMD -0.23 (-0.57, 0.10), I <sup>2</sup> 73.8%                                               |                                                                                                                                                                      |                 |            |              |              |               |
|                           | de Jong (2009) [single arm int.] <sup>115</sup>           |                                                                                                                           | <u>Larsen score, BL / 18 months, median (net IQR)</u><br>Exercise: 3.0 (4.5) / 3.0 (4.0)                                                                             |                 |            |              |              |               |
| Walk-test                 | Flint-Wagner (2009) [RCT] <sup>93</sup>                   | <u>Exercise vs control, change BL-16 weeks</u><br>SMD -1.39 (-2.34, -0.45)                                                | <u>50ft walk test, change BL-16 weeks, means (SD)</u><br>Exercise: -1.2 (1.6)<br>Control: 0.8 (1.0)                                                                  |                 | H/UC       | H/UC         | H/UC         | H/UC          |
|                           | Neuberger (2007) [RCT] <sup>95</sup>                      | <u>Group exercise vs control</u><br>SMD -0.21 (-0.54, 0.13)<br><u>Home exercise vs control</u><br>SMD -0.14 (-0.46, 0.18) | <u>50ft walk test, BL / 12 weeks, mean (SD)</u><br>Group exercise: 10.0 (3.1) / 9.3 (2.8)<br>Home exercise: 9.6 (5.2) / 9.4 (4.4)<br>Control: 9.4 (2.8) / 10.0 (3.9) |                 | L          | H/UC         | H/UC         | L             |
|                           | Ekdahl (1990) [RCT] <sup>105</sup>                        |                                                                                                                           | <u>60m walk, change 0-6 weeks, mean</u><br>Dynamic: -3.7<br>Static: -0.5                                                                                             |                 | H/UC       | H/UC         | H/UC         | L             |
|                           | Nordemar (1981) [RCT] <sup>107</sup>                      | <u>Exercise vs control at 8 years</u><br>SMD 0.37 (-0.21, 0.97)                                                           | <u>850m walk test (mins), BL / 8 years, mean (SD)</u><br>Exercise: 8.4 (1.0) / 8.9 (1.8)<br>Control: 8.2 (3.5) / 8.0 (2.9)                                           |                 | H/UC       | H/UC         | H/UC         | H/UC          |
|                           | Neuberger (1997) [single arm int.] <sup>116</sup>         |                                                                                                                           | <u>50ft walk test, BL / 12 weeks, mean</u><br>10.41 / 9.44                                                                                                           |                 |            |              |              |               |

Alloc. Conc. = allocation concealment, AMSTAR2 = Assessing the Methodological Quality of Systematic Reviews, BL = baseline, Blind. Asses. = Blinded assessors, Blind. Part. = blinded participants, CI = confidence interval, H/UC = high / unclear risk of bias, IQR = interquartile range, L = low risk of bias, RA = rheumatoid arthritis, Rand. Seq. = random sequence generation, RCT = randomised controlled trial, SD = standard deviation, SMD = standardised mean difference

Table –Aerobic + muscle strengthening exercise (RA), results and quality assessment

| Outcome (outcome measure) | Study (date) [study type]                         | Standardised result, SMD (95% CI) unless otherwise stated                                                                                                                                               | Natural result                                                                                                                                                                                                                                                                                                                                          | AMSTAR2 quality | Rand. Seq. | Alloc. Conc. | Blind. Part. | Blind. Asses. |
|---------------------------|---------------------------------------------------|---------------------------------------------------------------------------------------------------------------------------------------------------------------------------------------------------------|---------------------------------------------------------------------------------------------------------------------------------------------------------------------------------------------------------------------------------------------------------------------------------------------------------------------------------------------------------|-----------------|------------|--------------|--------------|---------------|
| Grip strength             | Neuberger (2007) [RCT] <sup>95</sup>              | <u>Group exercise vs control</u><br>Left: SMD 0.01 (-0.32, 0.34)<br>Right: SMD -0.02 (-0.35, 0.31)<br><u>Home exercise vs control</u><br>Left: SMD 0.11 (-0.21, 0.43)<br>Right: SMD -0.08 (-0.40, 0.24) | <u>Grip strength, BL / 12 weeks, mean (SD)</u><br><u>Left</u><br>Group exercise: 117.4 (46.8) / 138.8 (54.6)<br>Home exercise: 134.7 (59.4) / 144.7 (63.8)<br>Control: 134.8 (56.6) / 138.1 (59.5)<br><u>Right</u><br>Group exercise: 121.4 (52.4) / 141.8 (56.6)<br>Home exercise: 130.9 (58.7) / 144.8 (64.9)<br>Control: 133.4 (58.7) / 143.0 (60.3) |                 | L          | H/UC         | H/UC         | L             |
|                           | Hakkinen (2004) [RCT] <sup>100</sup>              | <u>Exercise vs control at 2 years</u><br>SMD 0.55 (0.04, 1.05)                                                                                                                                          | <u>Grip strength, BL / 2 years / 5 years, mean (SD)</u><br>Exercise: 54.8 (30.5) / 72.3 (24.4) / 73.3 (25.7)<br>Control: 50.2 (22.0) / 59.0 (24.4) / 61.5 (25.4)                                                                                                                                                                                        |                 |            |              |              |               |
|                           | Lyngberg (1994) [RCT] <sup>104</sup>              | <u>Exercise vs control at 3 months</u><br>Left: SMD -0.45 (-1.26, 0.36)<br>Right: SMD -0.43 (-1.24, 0.38)                                                                                               | <u>Grip strength, BL / 3 months, mean (SD §)</u><br><u>Left</u><br>Exercise: 100.8 (45.0) / 93.5 (42.8)<br>Control: 129.5 (34.9) / 113.8 (47.4)<br><u>Right</u><br>Exercise: 93.3 (32.1) / 100.3 (41.9)<br>Control: 114.5 (31.2) / 119.3 (46.8)                                                                                                         |                 | H/UC       | H/UC         | H/UC         | L             |
|                           | Nordgren (2015) [single arm int.] <sup>111</sup>  |                                                                                                                                                                                                         | <u>Grip strength, change BL-1 years, mean (SD †)</u><br>13.74 (49.2)                                                                                                                                                                                                                                                                                    |                 |            |              |              |               |
|                           | Neuberger (1997) [single arm int.] <sup>116</sup> |                                                                                                                                                                                                         | <u>Grip strength, BL / 12 weeks, mean</u><br>Left: 127 / 150<br>Right: 121 / 139                                                                                                                                                                                                                                                                        |                 |            |              |              |               |

† SD calculated from standard error, § mean (SD) estimated from median (range) using a published formula<sup>87</sup>

Alloc. Conc. = allocation concealment, AMSTAR2 = Assessing the Methodological Quality of Systematic Reviews, BL = baseline, Blind. Asses. = Blinded assessors, Blind. Part. = blinded participants, CI = confidence interval, H/UC = high / unclear risk of bias, L = low risk of bias, RA = rheumatoid arthritis, Rand. Seq. = random sequence generation, RCT = randomised controlled trial, SD = standard deviation, SMD = standardised mean difference

Table –Aerobic + muscle strengthening exercise (RA), results and quality assessment

| Outcome (outcome measure) | Study (date) [study type]            | Standardised result, SMD (95% CI) unless otherwise stated                                                               | Natural result                                                                                                                                                                                                                  | AMSTAR2 quality | Rand. Seq. | Alloc. Conc. | Blind. Part. | Blind. Asses. |
|---------------------------|--------------------------------------|-------------------------------------------------------------------------------------------------------------------------|---------------------------------------------------------------------------------------------------------------------------------------------------------------------------------------------------------------------------------|-----------------|------------|--------------|--------------|---------------|
| Bone mineral density      | de Jong (2004) [RCT] <sup>97</sup>   |                                                                                                                         | <u>Hip BMD, change BL – 1 year, median (IQR)</u><br>Exercise: 0% (-2.0, 2.0)<br>Control: 1% (-3.7, 0.5)<br><u>Lumbar spine BMD, change BL – 1 year, median (IQR)</u><br>Exercise: 1.1% (-0.7, 2.3)<br>Control: 0.9% (-1.2, 3.2) |                 | L          | L            | H/UC         | L             |
|                           | Hakkinen (2004) [RCT] <sup>100</sup> | <u>Exercise vs control, change BL-2 years</u><br>Lumbar spine: 0.43 (-0.08, 0.93)<br>Femoral neck: 0.39 (-0.11, 0.90)   | <u>Bone mineral density, change BL-2 years, mean (SD †)</u><br><u>Lumbar spine</u><br>Exercise: 0.01 (0.07)<br>Control: -0.02 (0.07)<br><u>Femoral neck</u><br>Exercise: 0.01 (0.04)<br>Control: -0.01 (0.06)                   |                 | H/UC       | H/UC         | H/UC         | H/UC          |
|                           | Hakkinen (1999) [RCT] <sup>103</sup> | <u>Exercise vs control, change BL-12 months</u><br>Lumbar spine: 0.33 (-0.16, 0.82)<br>Femoral neck: 0.31 (-0.18, 0.80) | <u>Bone mineral density, % change BL – 12 months, mean (SD)</u><br><u>Lumbar spine</u><br>Exercise: 0.19% (3.71)<br>Control: -1.14% (4.36)<br><u>Femoral neck</u><br>Exercise: 1.10% (3.71)<br>Control: -0.03% (3.58)           |                 | H/UC       | H/UC         | H/UC         | H/UC          |

† SD calculated from 95% CI

Alloc. Conc. = allocation concealment, AMSTAR2 = Assessing the Methodological Quality of Systematic Reviews, BL = baseline, Blind. Asses. = Blinded assessors, Blind. Part. = blinded participants, BMD = bone mineral density, CI = confidence interval, H/UC = high / unclear risk of bias, IQR = interquartile range, L = low risk of bias, RA = rheumatoid arthritis, Rand. Seq. = random sequence generation, RCT = randomised controlled trial, SD = standard deviation, SMD = standardised mean difference

Table – Aerobic + muscle strengthening exercise (RA), SF36 results at final follow-up, mean (SD)

| Author (date)                                                  | PCS          | MCS           | GH | PF | RP | RE | SF | BP | V | MH |
|----------------------------------------------------------------|--------------|---------------|----|----|----|----|----|----|---|----|
| Hurkmans (2010) [exercise] <sup>91</sup>                       | 5.2 (20.8) ‡ | 4.9 (18.8) ‡  |    |    |    |    |    |    |   |    |
| Hurkmans (2010) [control] <sup>91</sup>                        | 1.7 (18.2) ‡ | 2.7 (19.7) ‡  |    |    |    |    |    |    |   |    |
| Bulthuis (2007) [exercise] <sup>94</sup>                       | 28.1 †       | 50.0 (10.3)   |    |    |    |    |    |    |   |    |
| Bulthuis (2007) [control] <sup>94</sup>                        | 25.8 (5.0)   | 46.2 (13.2)   |    |    |    |    |    |    |   |    |
| van den Berg (2006)<br>[individualised exercise] <sup>92</sup> | 4.9 (17.6) § | -0.2 (21.0) § |    |    |    |    |    |    |   |    |
| van den Berg (2006) [exercise<br>guidance] <sup>92</sup>       | 4.0 (18.2) § | 0.8 (16.7) §  |    |    |    |    |    |    |   |    |

† cannot calculate SD as full 95% CI not reported,

§ change from BL-12 months, ‡ change from BL-24 months

BL = baseline, BP = bodily pain, FU = follow-up, GH = general health, IQR = interquartile range, MCS = mental component score, MH = mental health, PCS = physical component score, PF = physical function, RE = role emotional, RP = role physical, SD = standard deviation, SF = social functioning, V = vitality

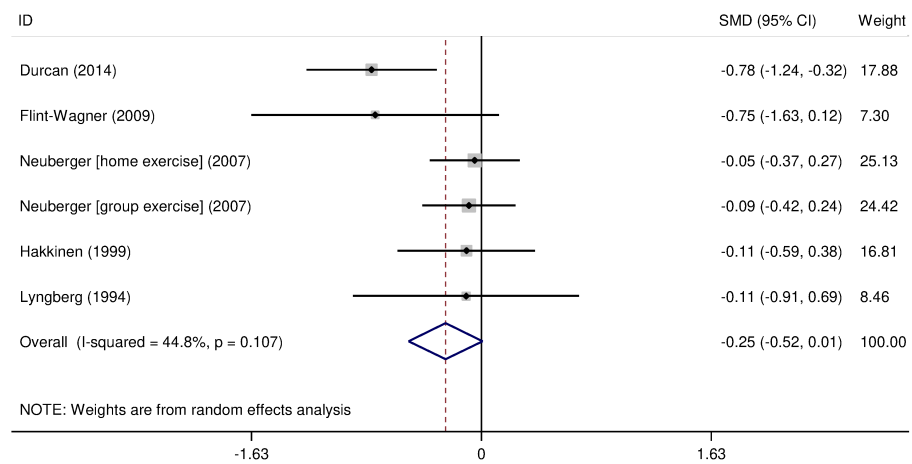

Figure – The effect of aerobic + muscle strengthening exercise on pain (RA)

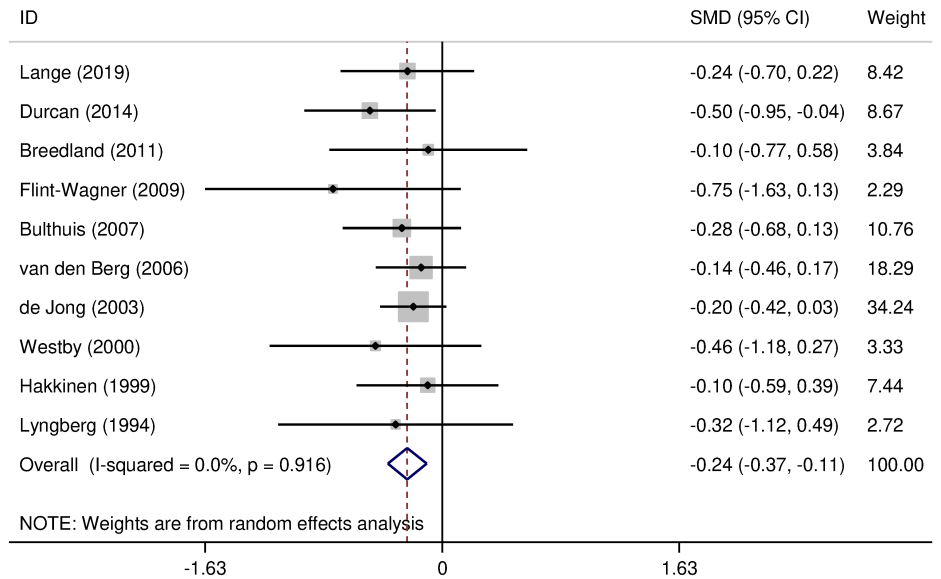

Figure – The effect of aerobic + muscle strengthening exercise on function (RA)

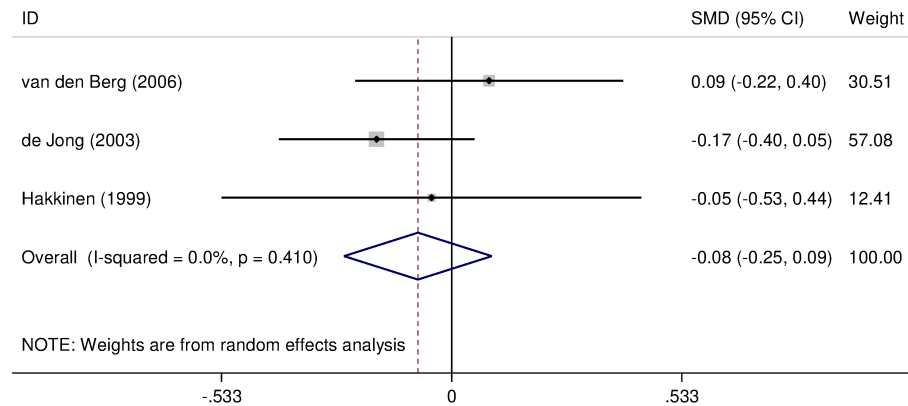

Figure – The effect of aerobic + muscle strengthening exercise on disease

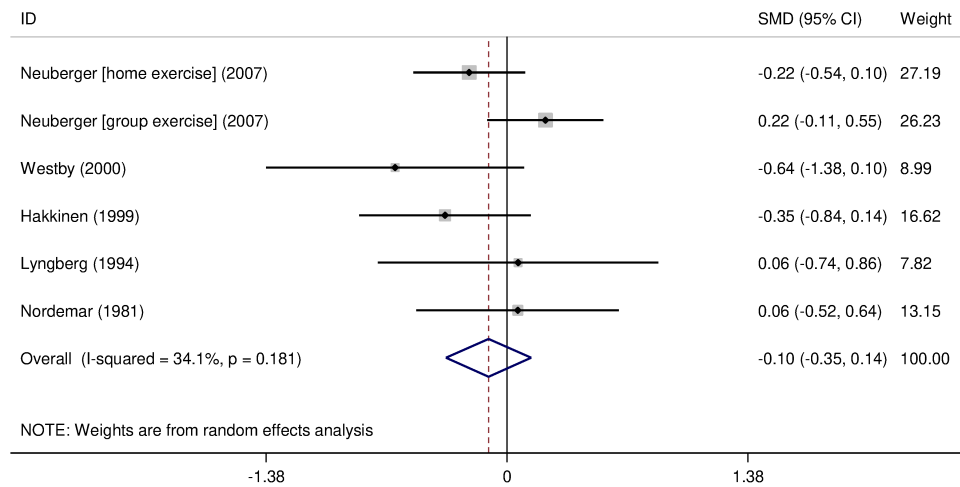

Figure – The effect of aerobic + muscle strengthening exercise on ESR (RA)

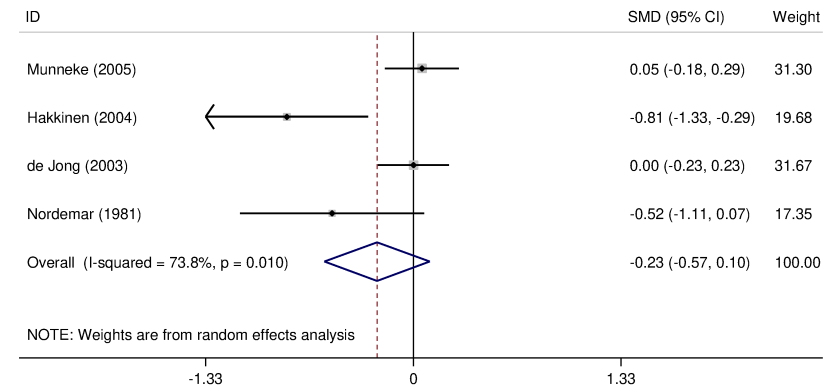

Figure – The effect of aerobic + muscle strengthening exercise on radiological damage (RA)

## Supplementary table 34 – Description of reviews of studies of aquatic exercise in RA

*Table – Aquatic exercises (RA), description of reviews*

| Authors (date)                     | Review type | Study type included          | Exposure detail                    | Number of studies included | Funders             |
|------------------------------------|-------------|------------------------------|------------------------------------|----------------------------|---------------------|
| Siegel (2017) <sup>69</sup>        | SR          | Reviews, RCTs, observational | Aquatic exercises                  | 2                          | <b>Not reported</b> |
| Al-Qubaeissy (2013) <sup>117</sup> | SR          | RCTs                         | Aquatic exercises and hydrotherapy | 6                          | <b>Not reported</b> |

RA = rheumatoid arthritis, RCT = randomised controlled trial, SR = systematic review



## Supplementary table 35 – Description of original studies of aquatic exercise in RA

Table – Aquatic exercises (RA), description of included studies

| Author (date) [country]                 | Study design | Inclusion criteria                                                                                                                                                                                                                                                                                                                                                                                                                                                                                                                                                                                                                                                                                     | Exposure detail                                                                                                                                      | N                       | Age years, mean (SD)                             | N (%) female                              | Funders                                                                           |
|-----------------------------------------|--------------|--------------------------------------------------------------------------------------------------------------------------------------------------------------------------------------------------------------------------------------------------------------------------------------------------------------------------------------------------------------------------------------------------------------------------------------------------------------------------------------------------------------------------------------------------------------------------------------------------------------------------------------------------------------------------------------------------------|------------------------------------------------------------------------------------------------------------------------------------------------------|-------------------------|--------------------------------------------------|-------------------------------------------|-----------------------------------------------------------------------------------|
| Siqueira (2017) [Brazil] <sup>118</sup> | RCT          | 1987 ACR RA criteria, mild-moderate disease activity, functional class I-II, stable DMARDs for 3 months, capacity to perform exercise<br>Exclusions: circulatory problems, ulcers or skin lesions, regular physical activity or rehabilitation in past 3 months, use of orthoses / ambulatory device, prosthetic hip or knee, regular use of protein supplements or anabolic medication, orthopaedic surgery scheduled in next 6 months, intra-articular injection in past 3 months, cognitive/auditory/visual deficits, water phobia, hypersensitivity to pool cleaning products, active/recurrent infection, epilepsy, urinary or faecal incontinence, anaemia or liver kidney function out of range | Exercise classes divided into warm-up and then specific lower limb exercises – 3x per week<br>1) Aquatic<br>2) Land based<br>p) no physical activity | 1) 33<br>2) 33<br>p) 34 | 1) 55 (6)<br>2) 54 (5.1)<br>p) 53.2 (7)          | 1) 33 (100)<br>2) 33 (100)<br>p) 34 (100) | <b>University</b> (Federal University of Sao Paulo)                               |
| Eversden (2007) [UK] <sup>119</sup>     | RCT          | 1987 ACR RA criteria, ≥18 years, functional class I-III, communicate in English, stable DMARDs for 6 weeks, stable NSAIDs for 2 weeks<br>Exclusions: surgery in past 3 months or planned, physiotherapy / hydrotherapy in past 3 months, chlorine sensitivity, infected open wound, poorly controlled epilepsy, hypertension, diabetes, incontinence of faeces, fear of water, pregnancy, patients with comorbidities that prevent safe hydrotherapy, carriers of methicillin resistant staphylococcus aureus in the upper respiratory tract; and those who weighed more than 102 kg                                                                                                                   | 1) Exercises in a warm pool – exercises focused on joint mobility, muscle strength and functional activities<br>p) Similar exercises on land         | 1) 57<br>p) 58          | 1) 55.2 (13.3)<br>p) 56.1 (11.9)                 | 1) 39 (68.4)<br>p) 42 (72.4)              | <b>Charity</b> (University Hospital Birmingham NHS Foundation Trust Charities)    |
| Bilberg (2005) [Sweden] <sup>120</sup>  | RCT          | 1987 ACR RA criteria, symptom duration 1-5 years, stable medication for 3 months, functional class I-III, aged 20-65 years<br>Exclusions: Other severe diseases or functional limitations that would make pool training impossible                                                                                                                                                                                                                                                                                                                                                                                                                                                                     | 1) 45 min long sessions of moderate intensity aerobic exercise in a warm pool<br>p) Continued daily activities                                       | 1) 20<br>p) 23          | Median (range)<br>1) 49 (32-62)<br>p) 46 (21-65) | Not reported                              | <b>Charity</b> (Swedish Rheumatism Association, Rune and Ulla Amlov's Foundation) |

ACR = American College of Rheumatology, DMARD = disease modifying anti-rheumatic drug, N = number, NHS = National Health Service, NSAID = non-steroidal anti-inflammatory drug, RA = rheumatoid arthritis, RCT = randomised controlled trial, SD = standard deviation, UK = United Kingdom

Table – Aquatic exercises (RA), description of included studies

| Author (date) [country]               | Study design | Inclusion criteria                                                                                                                                                                                    | Exposure detail                                                                                                                                                                     | N                                         | Age years, mean (SD)                                                                                   | N (%) female                                                               | Funders                                                                                                                                                                       |
|---------------------------------------|--------------|-------------------------------------------------------------------------------------------------------------------------------------------------------------------------------------------------------|-------------------------------------------------------------------------------------------------------------------------------------------------------------------------------------|-------------------------------------------|--------------------------------------------------------------------------------------------------------|----------------------------------------------------------------------------|-------------------------------------------------------------------------------------------------------------------------------------------------------------------------------|
| Hansen (1993) [Denmark] <sup>78</sup> | RCT          | Definite or classical RA<br>Exclusions: Functional status III-IV, aged <20 or >60 years, disease other than RA with contraindicate / make physical training impossible, already training ≥3x per week | 1) Self-training after instruction<br>2) As 1, plus training with physio once per week<br>3) As 1 plus weekly group training<br>4) As 3 plus training in hot pool<br>p) No training | 1) 15<br>2) 15<br>3) 15<br>4) 15<br>p) 15 | Median (IQR)<br>1) 55 (44, 58)<br>2) 52 (46, 58)<br>3) 51 (42, 56)<br>4) 54 (44, 56)<br>p) 51 (46, 57) | 1) 12 (80.0)<br>2) 7 (46.7)<br>3) 9 (60.0)<br>4) 11 (73.3)<br>p) 10 (66.7) | <b>Charity</b> (Danish Arthritis Foundation, Danish Physiotherapists' Research Fund), <b>Government</b> (Danish Research Council, Fund for Medical Research in South Jutland) |
| Minor (1995) [USA] <sup>80</sup>      | NRT          | Aged 21-64 years, women, expressed intent to exercise, no pre-existing medical condition, function class I-II                                                                                         | 1) 12 weeks – low impact aerobic dance, walking, aquatics<br>p) Usual care                                                                                                          | 1) 20<br>p) 22                            | 1) 46.0 (13.1)<br>p) 54.8 (8.4)                                                                        | 1) 20 (100)<br>p) 22 (100)                                                 | <b>Charity</b> (Arthritis Foundation), <b>Government</b> (NIDRR)                                                                                                              |

N = number, NIDRR = National Institute on Disability and Rehabilitation Research, NRT = non-randomised trial, RA = rheumatoid arthritis, RCT = randomised controlled trial, SD = standard deviation, USA = United States of America

## Supplementary table 36 – Results from reviews and interventional studies of aquatic exercise in RA

Table – Aquatic exercises (RA), results and quality assessment

| Outcome (outcome measure) | Study (date) [study type]                          | Standardised result, SMD (95% CI) unless otherwise stated                                                                                                                                                                                                   | Natural result                                                                                                                                                                                                                              | AMSTAR2 quality | Rand. Seq. | Alloc. Conc. | Blind. Part. | Blind. Asses. |
|---------------------------|----------------------------------------------------|-------------------------------------------------------------------------------------------------------------------------------------------------------------------------------------------------------------------------------------------------------------|---------------------------------------------------------------------------------------------------------------------------------------------------------------------------------------------------------------------------------------------|-----------------|------------|--------------|--------------|---------------|
| Pain                      | Al-Qubaeissy (2013) [SR] <sup>117</sup>            |                                                                                                                                                                                                                                                             | 1/3 studies reported improvements in pain                                                                                                                                                                                                   | Moderate        |            |              |              |               |
|                           | Eversden (2007) [RCT] <sup>119</sup>               | <u>Aquatic vs land exercise</u><br>SMD -0.27 (-0.64, 0.10) [in favour of aquatic exercises]                                                                                                                                                                 | <u>Pain VAS, BL / 6 weeks, mean (SD †)</u><br>Aquatic exercise: 28.0 (30.4) / 25.8 (22.8)<br>Land exercises: 30.5 (28.1) / 33.5 (32.7)                                                                                                      |                 | L          | L            | H/UC         | L             |
|                           | Hansen (1993) [RCT] <sup>78</sup>                  | <u>Aquatic exercise vs other exercises / control at 2 years</u><br>Aquatic vs group: SMD -1.21 (-2.00, -0.43)<br>Aquatic vs physio: SMD -0.73 (-1.47, 0.01)<br>Aquatic vs individual: SMD 0.49 (-0.24, 1.21)<br>Aquatic vs control: SMD -0.49 (-1.21, 0.24) | <u>Pain VAS, BL / 2 years, mean (SD †)</u><br>Individual exercise: 1.6 (0.3) / 1.4 (0.3)<br>Physio: 1.8 (0.4) / 1.9 (0.3)<br>Group training: 1.9 (0.4) / 2.1 (0.3)<br>Group + pool: 1.9 (0.2) / 1.6 (0.5)<br>Control: 1.9 (0.2) / 1.8 (0.3) |                 | H/UC       | H/UC         | H/UC         | L             |
|                           | Bespoke meta-analysis including <sup>78,119</sup>  | <u>Aquatic exercise vs land exercise</u><br>SMD -0.68 (-1.59, 0.24), I <sup>2</sup> 78%<br>[included the aquatic vs group comparison from Hansen et al]                                                                                                     |                                                                                                                                                                                                                                             |                 |            |              |              |               |
| Function                  | Siegel (2017) [SR] <sup>69</sup>                   |                                                                                                                                                                                                                                                             | 1 review <sup>121</sup> reported an improvement in function, but not greater than control                                                                                                                                                   | Moderate        |            |              |              |               |
|                           | Al-Qubaeissy (2013) [SR] <sup>117</sup>            |                                                                                                                                                                                                                                                             | 0/3 studies reported improvements in function                                                                                                                                                                                               | Moderate        |            |              |              |               |
|                           | Siqueira (2017) [RCT] <sup>118</sup>               | <u>Aquatic vs land at 16 weeks</u><br>SMD -0.78 (-1.29, -0.28)<br><u>Aquatic vs control at 16 weeks</u><br>SMD -0.72 (-1.22, -0.23)                                                                                                                         | <u>HAQ, BL / 16 weeks, mean (SD)</u><br>Aquatic exercise: 0.7 (0.5) / 0.4 (0.4)<br>Land exercise: 0.7 (0.5) / 0.8 (0.6)<br>Control: 0.8 (0.5) / 1.3 (1.7)                                                                                   |                 | L          | L            | H/UC         | L             |
|                           | Eversden (2007) [RCT] <sup>119</sup>               | <u>Aquatic vs land exercise</u><br>SMD 0.17 (-0.20, 0.54) [in favour of land exercises]                                                                                                                                                                     | <u>HAQ, BL / 6 weeks, mean (SD †)</u><br>Aquatic exercise: 1.36 (1.00) / 1.47 (0.59)<br>Land exercises: 1.46 (0.85) / 1.35 (0.81)                                                                                                           |                 | L          | L            | H/UC         | L             |
|                           | Bilberg (2005) [RCT] <sup>120</sup>                | <u>Exercise vs control at 3 months</u><br>SMD -0.18 (-0.78, 0.42)                                                                                                                                                                                           | <u>HAQ, BL / 3 months, mean (SD)</u><br>Aquatic exercise: 0.9 (0.5) / 0.7 (0.5)<br>Control: 0.7 (0.5) / 0.8 (0.6)                                                                                                                           |                 | L          | H/UC         | H/UC         | L             |
|                           | Bespoke meta-analysis including <sup>118,119</sup> | <u>Aquatic exercise vs land exercise</u><br>SMD -0.29 (-1.23, 0.64), I <sup>2</sup> 89%                                                                                                                                                                     |                                                                                                                                                                                                                                             |                 |            |              |              |               |
| Disease activity          | Siqueira (2017) [RCT] <sup>118</sup>               | <u>Aquatic vs land at 16 weeks</u><br>SMD -0.45 (-0.94, 0.04)<br><u>Aquatic vs control at 16 weeks</u><br>SMD -1.16 (-1.68, -0.64)                                                                                                                          | <u>DAS28, BL / 16 weeks, mean (SD)</u><br>Aquatic exercise: 3.8 (1.2) / 3.1 (1)<br>Land exercise: 3.6 (1.2) / 3.6 (1.2)<br>Control: 4.3 (0.9) / 4.2 (0.9)                                                                                   |                 | L          | L            | H/UC         | L             |

† Mean (SD) estimated from median (interquartile range) using published formula<sup>87</sup>

Alloc. Conc. = allocation concealment, AMSTAR2 = Assessing the Methodological Quality of Systematic Reviews, BL = baseline, Blind. Asses. = Blinded assessors, Blind. Part. = blinded participants, CI = confidence interval, DAS28 = Disease Activity Score 28, H/UC = high / unclear risk of bias, HAQ = Health Assessment Questionnaire, L = low risk of bias, RA = rheumatoid arthritis, Rand. Seq. = random sequence generation, RCT = randomised controlled trial, SD = standard deviation, SMD = standardised mean difference, SR = systematic review, VAS = visual analogue scale

Table – Aquatic exercises (RA), results and quality assessment

| Outcome (outcome measure) | Study (date) [study type]               | Standardised result, SMD (95% CI) unless otherwise stated                                                                                                                                                                                                     | Natural result                                                                                                                                                                                                                                                         | AMSTAR2 quality | Rand. Seq. | Alloc. Conc. | Blind. Part. | Blind. Asses. |
|---------------------------|-----------------------------------------|---------------------------------------------------------------------------------------------------------------------------------------------------------------------------------------------------------------------------------------------------------------|------------------------------------------------------------------------------------------------------------------------------------------------------------------------------------------------------------------------------------------------------------------------|-----------------|------------|--------------|--------------|---------------|
| Swollen joints            | Hansen (1993) [RCT] <sup>78</sup>       | <u>Aquatic exercise vs other exercises / control at 2 years</u><br>Aquatic vs group: SMD -0.92 (-1.68, -0.17)<br>Aquatic vs physio: SMD -0.33 (-1.05, 0.39)<br>Aquatic vs individual: SMD -0.37 (-1.09, 0.35)<br>Aquatic vs control: SMD -1.16 (-1.94, -0.39) | <u>Swollen joint count, BL / 2 years, mean (SD †)</u><br>Individual exercise: 3.5 (1.3) / 3.4 (1.8)<br>Physio: 3.9 (1.0) / 3.3 (1.6)<br>Group training: 2.8 (1.3) / 4.5 (2.2)<br>Group + pool: 3.3 (0.9) / 2.8 (1.4)<br>Control: 3.7 (1.7) / 5.9 (3.5)                 |                 | H/UC       | H/UC         | H/UC         | L             |
| Morning stiffness         | Hansen (1993) [RCT] <sup>78</sup>       | <u>Aquatic exercise vs other exercises / control at 2 years</u><br>Aquatic vs group: SMD 0.87 (0.12, 1.62)<br>Aquatic vs physio: SMD -1.46 (-2.27, -0.65)<br>Aquatic vs individual: SMD 0.05 (-0.67, 0.77)<br>Aquatic vs control: SMD -1.57 (-2.40, -0.75)    | <u>Morning stiffness, BL / 2 years, mean (SD †)</u><br>Individual exercise: 39.3 (14.1) / 24.5 (10.9)<br>Physio: 33.5 (16.1) / 46.0 (18.4)<br>Group training: 32.5 (14.4) / 17.5 (8.6)<br>Group + pool: 58.8 (18.7) / 25.0 (8.6)<br>Control: 53.3 (19.3) / 53.8 (24.4) |                 | H/UC       | H/UC         | H/UC         | L             |
| QoL                       | Siegel (2017) [SR] <sup>69</sup>        |                                                                                                                                                                                                                                                               | 2 reviews, one reported short-term benefits, the other reported improvements but not greater than control                                                                                                                                                              | Moderate        |            |              |              |               |
|                           | Al-Qubaeissy (2013) [SR] <sup>117</sup> |                                                                                                                                                                                                                                                               | 0/3 studies reported improvements in QoL                                                                                                                                                                                                                               | Moderate        |            |              |              |               |
|                           | Eversden (2007) [RCT] <sup>119</sup>    | <u>Aquatic vs land exercise</u><br>SMD 0.00 (-0.37, 0.37)                                                                                                                                                                                                     | <u>EQ5D, BL / 6 weeks, mean (SD †)</u><br>Aquatic exercise: 0.67 (0.21) / 0.69 (0.14)<br>Land exercises: 0.68 (0.13) / 0.69 (0.15)                                                                                                                                     |                 | L          | L            | H/UC         | L             |
| Acute phase-reactants     | Al-Qubaeissy (2013) [SR] <sup>117</sup> |                                                                                                                                                                                                                                                               | 0/2 studies reported improvements in CRP/ESR                                                                                                                                                                                                                           | Moderate        |            |              |              |               |
| ESR                       | Hansen (1993) [RCT] <sup>78</sup>       | <u>Aquatic exercise vs other exercises / control at 2 years</u><br>Aquatic vs group: SMD -0.66 (-1.39, 0.08)<br>Aquatic vs physio: SMD -0.54 (-1.27, 0.19)<br>Aquatic vs individual: SMD -0.91 (-1.67, -0.16)<br>Aquatic vs control: SMD -1.40 (-2.21, -0.60) | <u>ESR, BL / 2 years, mean (SD †)</u><br>Individual exercise: 32.3 (9.5) / 25.8 (11.2)<br>Physio: 25.5 (5.2) / 20.8 (6.0)<br>Group training: 22.0 (10.3) / 25.0 (14.9)<br>Group + pool: 21.3 (3.7) / 17.5 (6.3)<br>Control: 22.5 (5.7) / 30.5 (11.5)                   |                 | H/UC       | H/UC         | H/UC         | L             |

† Mean (SD) estimated from median (interquartile range) using published formula<sup>87</sup>

Alloc. Conc. = allocation concealment, AMSTAR2 = Assessing the Methodological Quality of Systematic Reviews, BL = baseline, Blind. Asses. = Blinded assessors, Blind. Part. = blinded participants, CI = confidence interval, ESR = erythrocyte sedimentation rate, H/UC = high / unclear risk of bias, L = low risk of bias, RA = rheumatoid arthritis, Rand. Seq. = random sequence generation, RCT = randomised controlled trial, SD = standard deviation, SMD = standardised mean difference, SR = systematic review

Table – Aquatic exercises (RA), results and quality assessment

| Outcome (outcome measure) | Study (date) [study type]            | Standardised result, SMD (95% CI) unless otherwise stated                                                                                                                                                                                                   | Natural result                                                                                                                                                                                                                                                   | AMSTAR2 quality | Rand. Seq. | Alloc. Conc. | Blind. Part. | Blind. Asses. |
|---------------------------|--------------------------------------|-------------------------------------------------------------------------------------------------------------------------------------------------------------------------------------------------------------------------------------------------------------|------------------------------------------------------------------------------------------------------------------------------------------------------------------------------------------------------------------------------------------------------------------|-----------------|------------|--------------|--------------|---------------|
| Radiological damage       | Hansen (1993) [RCT] <sup>78</sup>    | <u>Aquatic exercise vs other exercises / control at 2 years</u><br>Aquatic vs group: SMD -0.10 (-0.82, 0.62)<br>Aquatic vs physio: SMD -0.38 (-1.10, 0.35)<br>Aquatic vs individual: SMD 0.08 (-0.64, 0.79)<br>Aquatic vs control: SMD -1.74 (-2.59, -0.89) | <u>Larsen score, BL / 2 years, mean (SD †)</u><br>Individual exercise: 43.0 (19.0) / 50.0 (20.1)<br>Physio: 47.5 (9.2) / 57.8 (14.1)<br>Group training: 41.8 (17.0) / 53.3 (16.4)<br>Group + pool: 42.0 (19.5) / 51.5 (19.0)<br>Control: 70.8 (8.9) / 77.5 (9.2) |                 | H/UC       | H/UC         | H/UC         | L             |
| Grip strength             | Minor (1995) [NRT] <sup>80</sup>     | <u>Exercise vs control at 12 months</u><br>0.28 (-0.33, 0.88)                                                                                                                                                                                               | <u>Grip strength at 12 months, mean (SD)</u><br>Exercise: 110 (60)<br>Control: 95 (49)                                                                                                                                                                           |                 |            |              |              |               |
| Walk-test                 | Eversden (2007) [RCT] <sup>119</sup> | <u>Aquatic vs land exercise</u><br>SMD 0.00 (-0.37, 0.37)                                                                                                                                                                                                   | <u>10m walk-time (s), BL / 6 weeks, mean (SD †)</u><br>Aquatic exercise: 10.5 (3.7) / 9.0 (2.7)<br>Land exercises: 10.7 (3.3) / 9.0 (3.3)                                                                                                                        |                 | L          | L            | H/UC         | L             |
| Work                      | Minor (1995) [NRT] <sup>80</sup>     | <u>Exercise vs control at 12 months</u><br>Hands: SMD 0.08 (-0.52, 0.69)<br>Lift: SMD 0.60 (-0.02, 1.22)<br>Legs: SMD 0.67 (0.05, 1.30)                                                                                                                     | <u>Work Capacity Evaluation at 12 months, mean (SD)</u><br><u>Hands</u><br>Exercise: 1.8 (1.1)<br>Control: 1.7 (1.3)<br><u>Lift</u><br>Exercise: 2.6 (0.5)<br>Control: 2.3 (0.5)<br><u>Legs</u><br>Exercise: 2.9 (0.2)<br>Control: 2.5 (0.8)                     |                 |            |              |              |               |

† Mean (SD) estimated from median (interquartile range) using published formula<sup>87</sup>

Alloc. Conc. = allocation concealment, AMSTAR2 = Assessing the Methodological Quality of Systematic Reviews, BL = baseline, Blind. Asses. = Blinded assessors, Blind. Part. = blinded participants, CI = confidence interval, H/UC = high / unclear risk of bias, L = low risk of bias, NRT = non-randomised trial, RA = rheumatoid arthritis, Rand. Seq. = random sequence generation, RCT = randomised controlled trial, SD = standard deviation, SMD = standardised mean difference, SR = systematic review

*Table – Aquatic exercise (RA), SF36 results at final follow-up, mean (SD)*

| Author (date)                            | PCS         | MCS         | GH          | PF          | RP          | RE          | SF          | BP          | V           | MH          |
|------------------------------------------|-------------|-------------|-------------|-------------|-------------|-------------|-------------|-------------|-------------|-------------|
| Bilberg (2005) [exercise] <sup>120</sup> | 37.1 (10.5) | 45.1 (11.5) | 49.8 (19.3) | 64.7 (20.0) | 39.5 (37.6) | 69.9 (36.1) | 73.7 (22.4) | 50.8 (23.4) | 51.8 (22.6) | 72.4 (15.9) |
| Bilberg (2005) [control] <sup>120</sup>  | 38.3 (9.6)  | 46.2 (10.8) | 59.3 (16.1) | 64.9 (21.4) | 48.9 (38.0) | 69.6 (36.1) | 71.2 (21.1) | 50.9 (21.0) | 49.1 (17.6) | 72.7 (16.9) |

BP = bodily pain, FU = follow-up, GH = general health, MCS = mental component score, MH = mental health, PCS = physical component score, PF = physical function, RE = role emotional, RP = role physical, SD = standard deviation, SF = social functioning, V = vitality

## Supplementary table 37 – Description of original studies comparing high vs low intensity exercise in RA

Table – High vs low intensity exercises (RA), description of included studies

| Author (date) [country]                              | Study design | Inclusion criteria                                                                                                                                                                                                                                                                                                                                                                                                  | Exposure detail                                                                                                                                                                                                                                                                                                                      | N                                | Age years, mean (SD)                                                | N (%) female                                                 | Funders                                                                                               |
|------------------------------------------------------|--------------|---------------------------------------------------------------------------------------------------------------------------------------------------------------------------------------------------------------------------------------------------------------------------------------------------------------------------------------------------------------------------------------------------------------------|--------------------------------------------------------------------------------------------------------------------------------------------------------------------------------------------------------------------------------------------------------------------------------------------------------------------------------------|----------------------------------|---------------------------------------------------------------------|--------------------------------------------------------------|-------------------------------------------------------------------------------------------------------|
| Lemmey (2012) [UK] <sup>122</sup>                    | RCT          | 1987 ACR RA criteria, aged ≥18 years, functional class I-II, not cognitively impaired, stable drug therapy, steroid dose <10mg/day, Free of other cachectic diseases (e.g. cancer, HIV, infection), free of medical conditions contraindicating regular high intensity exercise, not taking drugs or nutritional supplements known to be anabolic, not undertaking regular, intense physical training, not pregnant | 1) High intensity progressive muscle strengthening training<br>2) Home-based, low-intensity range of motion exercises                                                                                                                                                                                                                | 1) 9<br>2) 9                     | 1) 55.7 (8.6)<br>2) 59.4 (10.8)                                     | 1) 8 (88.9)<br>p) 6 (66.7)                                   | <b>Charity</b> (Arthritis Research Campaign)                                                          |
| Lemmey (2009) [UK] <sup>123</sup>                    | RCT          | See Lemmey 2012                                                                                                                                                                                                                                                                                                                                                                                                     | 1) High intensity progressive muscle strengthening training<br>2) Home-based, low-intensity range of motion exercises                                                                                                                                                                                                                | 1) 13<br>2) 15                   | 1) 55.6 (8.3)<br>2) 60.6 (11.2)                                     | 1) 11 (84.6)<br>p) 12 (80.0)                                 | <b>Charity</b> (Arthritis Research Campaign)                                                          |
| van den Ende (2000) [The Netherlands] <sup>124</sup> | RCT          | 1987 ACR RA criteria, aged 20-80 years, ability to walk 50ft in doors, ≥6 swollen joints and at least two of the following: morning stiffness >45 mins, tender joint count >9, ESR >28mm/hr<br>Exclusions: presence of arthroplasty in the knee, inability to tolerate training due to serious cardiac or lung disease                                                                                              | 1) Range of motion + isometric exercises + individually tailored regime consisting of strengthening exercises and cycling<br>2) Range of motion + isometric exercise only                                                                                                                                                            | 1) 34<br>2) 30                   | 1) 62 (13)<br>p) 58 (14)                                            | 1) 20 (58.8)<br>2) 20 (66.7)                                 | <b>Charity</b> (ZONMw) [Netherlands Organization for Health Research and Development]                 |
| van den Ende (1996) [The Netherlands] <sup>125</sup> | RCT          | 1987 ACR RA criteria, aged 20-70 years, stable medication for past 3 months, able to cycle on home trainer<br>Exclusions: High disease activity, inability to tolerate physical fitness training due to serious cardiac or lung disease, arthroplasty of weight bearing joint                                                                                                                                       | 1) High intensity – high paced exercise including cycling and strengthening exercises<br>2) Low intensity – range of motion and non-weight bearing isometric, muscle strengthening – performed seated, prone, standing<br>3) low intensity individual exercises (same as above)<br>4) written instructions to perform home exercises | 1) 25<br>2) 25<br>3) 25<br>4) 25 | 1) 51.1 (9.5)<br>2) 47.7 (13.6)<br>3) 53.1 (12.1)<br>4) 56.1 (12.1) | 1) 13 (52.0)<br>2) 16 (64.0)<br>3) 16 (64.0)<br>4) 18 (72.0) | <b>Charity</b> (Nationale Commissie Chronisch Zieken foundation), <b>Industry</b> (Zorg en Zekerheid) |

ACR = American College of Rheumatology, DMARD = disease modifying anti-rheumatic drug, N = number, NSAID = non-steroidal anti-inflammatory drug, RA = rheumatoid arthritis, RCT = randomised controlled trial, SD = standard deviation, UK = United Kingdom

## Supplementary table 38 – Results from reviews and interventional studies comparing high vs low intensity exercise in RA

Table – High vs low intensity, results and quality assessment

| Outcome (outcome measure) | Study (date) [study type]                          | Standardised result, SMD (95% CI) unless otherwise stated                             | Natural result                                                                                                                                                                               | AMSTAR2 quality | Rand. Seq. | Alloc. Conc. | Blind. Part. | Blind. Asses. |
|---------------------------|----------------------------------------------------|---------------------------------------------------------------------------------------|----------------------------------------------------------------------------------------------------------------------------------------------------------------------------------------------|-----------------|------------|--------------|--------------|---------------|
| Pain                      | van den Ende (2000) [RCT] <sup>124</sup>           | <u>High intensity vs low intensity, change BL-24 weeks</u><br>SMD 0.03 (-0.46, 0.52)  | <u>Pain VAS, change BL-24 weeks, mean (SD †)</u><br>High intensity: -1.7 (2.7)<br>Low intensity: -1.8 (3.4)                                                                                  |                 | H/UC       | L            | H/UC         | L             |
|                           | van den Ende (1996) [RCT] <sup>125</sup>           | <u>High intensity vs low intensity, change BL-12 weeks</u><br>SMD 0.00 (-0.55, 0.55)  | <u>Pain VAS, change BL-12 weeks, mean (95% CI)</u><br>High intensity: 0.2 (1.8)<br>Low intensity: 0.2 (1.4)<br>Low intensity – individual: 0 (1.7)<br>Low intensity – home: 0.9 (1.7)        |                 | H/UC       | H/UC         | H/UC         | H/UC          |
|                           | Bespoke meta-analysis including <sup>124;125</sup> | <u>High vs low intensity exercise</u><br>SMD 0.02 (-0.35, 0.39), I <sup>2</sup> 0%    |                                                                                                                                                                                              |                 |            |              |              |               |
| Function                  | Lemmey (2009) [RCT] <sup>123</sup>                 | <u>High intensity vs low intensity at 24 weeks</u><br>SMD 0.38 (-0.37, 1.13)          | <u>HAQ. BL / 24 weeks, mean (SD)</u><br>High intensity: 0.91 (0.68) / 0.82 (0.69)<br>Low intensity: 0.58 (0.62) / 0.58 (0.59)                                                                |                 | L          | H/UC         | H/UC         | H/UC          |
|                           | van den Ende (1996) [RCT] <sup>125</sup>           | <u>High intensity vs low intensity, change BL-12 weeks</u><br>SMD 0.00 (-0.55, 0.55)  | <u>HAQ. change BL-12 weeks, mean (SD †)</u><br>High intensity: -0.05 (0.36)<br>Low intensity: -0.05 (0.40)<br>Low intensity – individual: -0.03 (0.26)<br>Low intensity – home: 0.16 (0.34)  |                 | H/UC       | H/UC         | H/UC         | H/UC          |
|                           | Bespoke meta-analysis including <sup>123;125</sup> | <u>High vs low intensity exercise</u><br>SMD 0.13 (-0.31, 0.58), I <sup>2</sup> 0%    |                                                                                                                                                                                              |                 |            |              |              |               |
| Disease activity          | Lemmey (2009) [RCT] <sup>123</sup>                 | <u>High intensity vs low intensity at 24 weeks</u><br>SMD -0.42 (-1.17, 0.33)         | <u>DAS28. BL / 24 weeks, mean (SD)</u><br>High intensity: 3.29 (1.27) / 3.12 (1.34)<br>Low intensity: 3.28 (1.27) / 3.56 (0.71)                                                              |                 | L          | H/UC         | H/UC         | H/UC          |
|                           | van den Ende (2000) [RCT] <sup>124</sup>           | <u>High intensity vs low intensity, change BL-24 weeks</u><br>SMD -0.36 (-0.85, 0.14) | <u>DAS28, change BL-24 weeks, mean (SD †)</u><br>High intensity: -1.4 (1.9)<br>Low intensity: -0.7 (2.0)                                                                                     |                 | H/UC       | L            | H/UC         | L             |
|                           | Bespoke meta-analysis including <sup>123;124</sup> | <u>High vs low intensity exercise</u><br>SMD -0.38 (-0.79, 0.04), I <sup>2</sup> 0%   |                                                                                                                                                                                              |                 |            |              |              |               |
| Tender joints             | van den Ende (1996) [RCT] <sup>125</sup>           | <u>High intensity vs low intensity, change BL-12 weeks</u><br>SMD 0.00 (-0.55, 0.55)  | <u>Ritchie Index, change BL-12 weeks, mean (95% CI)</u><br>High intensity: -0.5 (4.3)<br>Low intensity: -0.5 (5.4)<br>Low intensity – individual: 0 (4.6)<br>Low intensity – home: 0.2 (3.8) |                 | H/UC       | H/UC         | H/UC         | H/UC          |

† SD calculated from 95% CI

Alloc. Conc. = allocation concealment, AMSTAR2 = Assessing the Methodological Quality of Systematic Reviews, BL = baseline, Blind. Asses. = Blinded assessors, Blind. Part. = blinded participants, CI = confidence interval, DAS28 = Disease Activity Score 28, HAQ = Health Assessment Questionnaire, H/UC = high / unclear risk of bias, L = low risk of bias, RA = rheumatoid arthritis, Rand. Seq. = random sequence generation, RCT = randomised controlled trial, SD = standard deviation, SMD = standardised mean difference, VAS = visual analogue scale



Table – High vs low intensity, results and quality assessment

| Outcome (outcome measure) | Study (date) [study type]                          | Standardised result, SMD (95% CI) unless otherwise stated                               | Natural result                                                                                                                                                                                                                  | AMSTAR2 quality | Rand. Seq. | Alloc. Conc. | Blind. Part. | Blind. Asses. |
|---------------------------|----------------------------------------------------|-----------------------------------------------------------------------------------------|---------------------------------------------------------------------------------------------------------------------------------------------------------------------------------------------------------------------------------|-----------------|------------|--------------|--------------|---------------|
| Swollen joints            | van den Ende (2000) [RCT] <sup>124</sup>           | <u>High intensity vs low intensity, change BL-24 weeks</u><br>SMD -0.35 (-0.84, 0.15)   | <u>Swollen joint count, change BL-24 weeks, mean (SD †)</u><br>High intensity: -6 (8.9)<br>Low intensity: -3 (8.4)                                                                                                              |                 | H/UC       | L            | H/UC         | L             |
|                           | van den Ende (1996) [RCT] <sup>125</sup>           |                                                                                         | <u>Swollen joint count, change BL-12 weeks, mean (95% CI)</u><br>High intensity: -1.7 (-2.8, -7.3 [sic])<br>Low intensity: 0.8 (0.0, 1.6)<br>Low intensity – individual: 0 (-1.1, 1.2)<br>Low intensity – home: 0.2 (-0.7, 1.2) |                 | H/UC       | H/UC         | H/UC         | H/UC          |
| Patient global            | van den Ende (1996) [RCT] <sup>125</sup>           | <u>High intensity vs low intensity, change BL-12 weeks</u><br>SMD 0.30 (-0.26, 0.86)    | <u>Patient global VAS, change BL-12 weeks, mean (95% CI)</u><br>High intensity: 0.1 (2.3)<br>Low intensity: -0.6 (2.4)<br>Low intensity – individual: -0.1 (1.9)<br>Low intensity – home: 0.3 (2.7)                             |                 | H/UC       | H/UC         | H/UC         | H/UC          |
| ESR                       | van den Ende (2000) [RCT] <sup>124</sup>           | <u>High intensity vs low intensity, change BL-24 weeks</u><br>SMD -0.50 (-1.00, -0.001) | <u>ESR, change BL-24 weeks, mean (SD †)</u><br>High intensity: -22 (35.7)<br>Low intensity: -4 (36.3)                                                                                                                           |                 | H/UC       | L            | H/UC         | L             |
|                           | van den Ende (1996) [RCT] <sup>125</sup>           | <u>High intensity vs low intensity, change BL-12 weeks</u><br>SMD 0.22 (-0.33, 0.78)    | <u>ESR, change BL-12 weeks, mean (95% CI)</u><br>High intensity: 0 (15.3)<br>Low intensity: -3 (11.5)<br>Low intensity – individual: 3 (14.0)<br>Low intensity – home: -1 (15.3)                                                |                 | H/UC       | H/UC         | H/UC         | H/UC          |
|                           | Bespoke meta-analysis including <sup>124;125</sup> | <u>High vs low intensity exercise</u><br>SMD -0.15 (-0.86, 0.56), I <sup>2</sup> 72.1%  |                                                                                                                                                                                                                                 |                 |            |              |              |               |

† SD calculated from 95% CI

Alloc. Conc. = allocation concealment, AMSTAR2 = Assessing the Methodological Quality of Systematic Reviews, BL = baseline, Blind. Asses. = Blinded assessors, Blind. Part. = blinded participants, CI = confidence interval, ESR = erythrocyte sedimentation rate, H/UC = high / unclear risk of bias, L = low risk of bias, RA = rheumatoid arthritis, Rand. Seq. = random sequence generation, RCT = randomised controlled trial, SD = standard deviation, SMD = standardised mean difference

Table – High vs low intensity, results and quality assessment

| Outcome (outcome measure) | Study (date) [study type]                          | Standardised result, SMD (95% CI) unless otherwise stated                             | Natural result                                                                                                                                                                           | AMSTAR2 quality | Rand. Seq. | Alloc. Conc. | Blind. Part. | Blind. Asses. |
|---------------------------|----------------------------------------------------|---------------------------------------------------------------------------------------|------------------------------------------------------------------------------------------------------------------------------------------------------------------------------------------|-----------------|------------|--------------|--------------|---------------|
| Walk-test                 | Lemmey (2012) [RCT] <sup>122</sup>                 | <u>High intensity vs low intensity at 3 years</u><br>SMD -0.20 (-1.13, 0.73)          | <u>50ft walk, BL / 3 years, mean (SD)</u><br>High intensity: 9.68 (2.77) / 8.50 (1.77)<br>Low intensity: 8.80 (2.96) / 9.06 (3.51)                                                       |                 | L          | H/UC         | H/UC         | H/UC          |
|                           | Lemmey (2009) [RCT] <sup>123</sup>                 | <u>High intensity vs low intensity at 24 weeks</u><br>SMD -0.65 (-1.41, 0.12)         | <u>50ft walk, BL / 24 weeks, mean (SD)</u><br>High intensity: 9.33 (2.40) / 7.77 (1.40)<br>Low intensity: 10.03 (3.78) / 9.89 (4.28)                                                     |                 | L          | H/UC         | H/UC         | H/UC          |
|                           | van den Ende (1996) [RCT] <sup>125</sup>           | <u>High intensity vs low intensity, change BI-12 weeks</u><br>SMD -0.18 (-0.73, 0.38) | <u>Walk-test, change BL-12 weeks, mean (SD †)</u><br>High intensity: -0.7 (1.5)<br>Low intensity: -0.4 (1.9)<br>Low intensity – individual: 0.0 (1.3)<br>Low intensity – home: 0.1 (1.5) |                 | H/UC       | H/UC         | H/UC         | H/UC          |
|                           | Bespoke meta-analysis including <sup>124,125</sup> | <u>High vs low intensity exercise</u><br>SMD -0.34 (-0.79, 0.11), I <sup>2</sup> 0%   |                                                                                                                                                                                          |                 |            |              |              |               |

† SD calculated from 95% CI

Alloc. Conc. = allocation concealment, AMSTAR2 = Assessing the Methodological Quality of Systematic Reviews, BL = baseline, Blind. Asses. = Blinded assessors, Blind. Part. = blinded participants, CI = confidence interval, H/UC = high / unclear risk of bias, L = low risk of bias, RA = rheumatoid arthritis, Rand. Seq. = random sequence generation, RCT = randomised controlled trial, SD = standard deviation, SMD = standardised mean difference

## Supplementary table 39 – Description of reviews of studies comparing home vs supervised exercise in RA

Table –Home exercise (RA), description of reviews

| Authors (date)                | Review type | Study type included          | Exposure detail     | Number of studies included | Funders             |
|-------------------------------|-------------|------------------------------|---------------------|----------------------------|---------------------|
| Siegel (2017) <sup>69</sup>   | SR          | Reviews, RCTs, observational | Home exercise       | 2                          | <b>Not reported</b> |
| Hammond (2016) <sup>126</sup> | SR          | RCTs                         | Home hand exercises | 3                          | <b>Not reported</b> |

RA = rheumatoid arthritis, RCT = randomised controlled trial, SR = systematic review

## Supplementary table 40 – Description of original studies comparing home vs supervised exercise in RA

Table – Home vs supervised exercise, description of included studies

| Author (date) [country]                  | Study design | Inclusion criteria                                                                                                                                                                                                                                                                                                                                                                                                                                                       | Exposure detail                                                                                                                                                                           | N                       | Age years, mean (SD)                               | N (%) female               | Funders                                                                                                                                                                                   |
|------------------------------------------|--------------|--------------------------------------------------------------------------------------------------------------------------------------------------------------------------------------------------------------------------------------------------------------------------------------------------------------------------------------------------------------------------------------------------------------------------------------------------------------------------|-------------------------------------------------------------------------------------------------------------------------------------------------------------------------------------------|-------------------------|----------------------------------------------------|----------------------------|-------------------------------------------------------------------------------------------------------------------------------------------------------------------------------------------|
| Zernicke (2016) [Germany] <sup>127</sup> | RCT §        | Met 1987 and 2010 criteria, patient global assessment <30, bDMARD treatment<br>Exclusions: epilepsy, flare of RA, previous use of Wii console.                                                                                                                                                                                                                                                                                                                           | 1) Conventional home-based exercise group – strength, balance, joint mobility, relaxation<br>2) Home exercise using Nintendo Wii console – yoga, muscle strengthening, balance, aerobic   | 1) 15<br>2) 15          | 1) 59 (9)<br>2) 52 (8)                             | 1) 10 (67)<br>2) 15 (100)  | <b>None</b>                                                                                                                                                                               |
| Seneca (2015) [Denmark] <sup>128</sup>   | RCT          | 2010 ACR/EULAR RA criteria, Early RA, aged >18 years, able to participate in intervention, live <20km from hospital, read Danish<br>Exclusions: DAS28-CRP >5.1, myocardial infarction within 6 months, angina pectoris, hypertension at ≥ 180/≥ 110 mmHg or treated hypertension at 160-179/100-109 mmHg, treatment with beta-blockers or presence of symptoms of severe or very severe chronic obstructive pulmonary disease.                                           | 1) Supervised exercise on bike as well as strength training<br>2) Self-administered exercises                                                                                             | 1) 25<br>2) 26          | Median (range)<br>1) 61 (27-79)<br>2) 54 (23-71)   | 1) 68%<br>2) 69%           | <b>None</b>                                                                                                                                                                               |
| Hsieh (2009) [Taiwan] <sup>129</sup>     | RCT          | 1987 ACR RA criteria, aged 20-65 years, symptom duration <6 months, well controlled condition<br>Exclusions: arthroplasty or major operation in knee or hip joint, presence of serious cardiac or pulmonary disease or any severe medical condition, severe arthritis or contracture of knee joint preventing bicycle exercise                                                                                                                                           | 1) 8 weeks, 3x per week – 10 mins stretching, 10 mins cycle/treadmill/other exercise machine, 30 min pool exercise, 10 min cool down<br>2) Home exercise programme similar to above       | 1) 15<br>2) 15          | 1) 54.1 (8.3)<br>2) 51.2 (12.0)                    | 1) 15 (100)<br>2) 15 (100) | <b>Government</b> (Taiwan National Science Council), <b>Hospital</b> (Shin Kong Wu Ho-Su Memorial Hospital), <b>University</b> (Taipei Medical University)                                |
| Neuberger (2007) [USA] <sup>95</sup>     | RCT          | 1987 ACR RA criteria, aged 40-70 years, communicate in English, ambulatory, no fibromyalgia or COPD, no beta-blockers or digitalis, not performing aerobic exercise 3x per week, having rheumatologist/physician approval to participate, meet criteria for aerobic fitness testing (no arrhythmias, recent myocardial infarction, acute infection, uncontrolled metabolic disease, known electrolyte abnormalities, or systolic BP 200 mm Hg or diastolic BP 115 mm Hg) | 1) 12 weeks – low impact aerobic/ muscle strengthening exercise for 1hr 3x per week in a supervised group setting<br>2) Same as above but at home via videotape<br>p) No exercise control | 1) 68<br>2) 79<br>p) 73 | Median (range)<br>55.5 (40-70)                     | 82.7% female               | <b>Government</b> (National Institute of Nursing Research of the NIH)                                                                                                                     |
| Stenstrom (1994) [Sweden] <sup>130</sup> | RCT          | 1987 ACR RA criteria, aged <70 years, functional class II<br>Exclusions: 500m walk time >10 mins                                                                                                                                                                                                                                                                                                                                                                         | 1) Goal setting group<br>2) Pain attention group – avoiding pain by not increasing weight too much                                                                                        | 1) 22<br>2) 20          | median (range)<br>1) 53.5 (26-68)<br>p) 58 (43-69) | 1) 68%<br>2) 70%           | <b>Government</b> (Sormland County Council, Swedish Medical Reserarc Council), <b>Professional body</b> (Swedish Association Against Rheumatism), <b>University</b> (Karolinska Intitute) |

§ cross-over trial; ACR = American College of Rheumatology, bDMARD = biologic disease modifying anti-rheumatic drug, DAS28-CRP = Disease Activity Sore (28 – C-reactive protein), EULAR = European League Against Rheumatism, N = number, NIH = National Institute of Health, RA = rheumatoid arthritis, RCT = randomised controlled trial, SD = standard deviation,

## Supplementary table 41 – Results from reviews and interventional studies comparing home vs supervised exercise in RA

Table –Home exercise (RA), results and quality assessment

| Outcome (outcome measure) | Study (date) [study type]                             | Standardised result, SMD (95% CI) unless otherwise stated                                                                      | Natural result                                                                                                                                                  | AMSTAR2 quality | Rand. Seq. | Alloc. Conc. | Blind. Part. | Blind. Asses. |
|---------------------------|-------------------------------------------------------|--------------------------------------------------------------------------------------------------------------------------------|-----------------------------------------------------------------------------------------------------------------------------------------------------------------|-----------------|------------|--------------|--------------|---------------|
| Pain                      | Siegel (2017) [SR] <sup>69</sup>                      |                                                                                                                                | Identified one previous systematic review <sup>131</sup> that reported home exercise was effective                                                              | Moderate        |            |              |              |               |
|                           | Hammond (2016) [SR] <sup>126</sup>                    |                                                                                                                                | Home exercises improved self-reported pain in the short-term                                                                                                    | Moderate        |            |              |              |               |
|                           | Seneca (2015) [RCT] <sup>128</sup>                    | <u>Home vs supervised, change BL-12 weeks</u><br>SMD 0.81 (0.24, 1.38)                                                         | <u>Pain VAS, change BL-12 weeks, mean (SD †)</u><br>Supervised exercise: -1.75 (2.29)<br>Home exercise: 0 (2.02)                                                |                 | H/UC       | H/UC         | H/UC         | L             |
|                           | Hsieh (2009) [RCT] <sup>129</sup>                     | <u>Home vs supervised exercise at 8 weeks</u><br>SMD -0.40 (-1.12, 0.33)                                                       | <u>Pain (0-10), BL / 8 weeks, mean (SD)</u><br>Supervised exercise: 3.60 (1.88) / 2.70 (2.14)<br>Home exercise: 2.70 (2.14) / 1.79 (2.42)                       |                 | L          | L            | H/UC         | L             |
|                           | Neuberger (2007) [RCT] <sup>95</sup>                  | <u>Home exercise vs group exercise at 12 weeks</u><br>SMD 0.05 (-0.28, 0.37)                                                   | <u>McGill Pain, BL / 12 weeks, mean (SD)</u><br>Group exercise: 4.7 (2.1) / 4.1 (2.2)<br>Home exercise: 3.9 (1.9) / 4.2 (1.9)<br>Control: 4.1 (2.3) / 4.3 (2.3) |                 | L          | H/UC         | H/UC         | L             |
|                           | Bespoke meta-analysis including <sup>95;128;129</sup> | <u>Home exercise vs supervised exercise</u><br>SMD 0.17 (-0.43, 0.77), I <sup>2</sup> 74.1% [in favour of supervised exercise] |                                                                                                                                                                 |                 |            |              |              |               |
| Function                  | Hammond (2016) [SR] <sup>126</sup>                    |                                                                                                                                | Home exercises improved hand function in the short-term                                                                                                         | Moderate        |            |              |              |               |
|                           | Zernicke (2016) [RCT] <sup>127</sup>                  |                                                                                                                                | <u>HAQ, BL / 12 weeks, mean</u><br>Home conventional exercise: 1.0 / 0.9<br>Wii console exercise: 0.7 / 0.7                                                     |                 | H/UC       | H/UC         | H/UC         | H/UC          |
|                           | Seneca (2015) [RCT] <sup>128</sup>                    | <u>Home vs supervised, change BL-12 weeks</u><br>SMD -0.19 (-0.74, 0.36)                                                       | <u>HAQ, change BL-12 weeks, mean (SD †)</u><br>Supervised exercise: -0.03 (0.29)<br>Home exercise: -0.08 (0.23)                                                 |                 | H/UC       | H/UC         | H/UC         | L             |
|                           | Hsieh (2009) [RCT] <sup>129</sup>                     | <u>Home vs supervised exercise at 8 weeks</u><br>SMD -0.14 (-0.85, 0.58)                                                       | <u>HAQ, BL / 8 weeks, mean (SD)</u><br>Supervised exercise: 0.44 (0.42) / 0.36 (0.31)<br>Home exercise: 0.41 (0.37) / 0.32 (0.27)                               |                 | L          | L            | H/UC         | L             |
|                           | Stenstrom (1994) [RCT] <sup>130</sup>                 | <u>Goal setting vs pain attention</u><br>SMD -0.61 (-1.23, 0.01)                                                               | <u>HAQ, change BL-24 weeks, mean (SD †)</u><br>Goal setting: -0.06 (0.32)<br>Pain attention: 0.22 (0.57)                                                        |                 | H/UC       | H/UC         | H/UC         | H/UC          |
|                           | Bespoke meta-analysis including <sup>128;129</sup>    | <u>Home exercise vs supervised exercise</u><br>SMD -0.17 (-0.61, 0.26), I <sup>2</sup> 0% [in favour of home exercise]         |                                                                                                                                                                 |                 |            |              |              |               |

† mean (SD) estimated from median (range) using published formula<sup>87</sup>

Alloc. Conc. = allocation concealment, AMSTAR2 = Assessing the Methodological Quality of Systematic Reviews, BL = baseline, Blind. Asses. = Blinded assessors, Blind. Part. = blinded participants, CI = confidence interval, H/UC = high / unclear risk of bias, HAQ = Health Assessment Questionnaire, L = low risk of bias, RA = rheumatoid arthritis, Rand. Seq. = random sequence generation, RCT = randomised controlled trial, SD = standard deviation, SMD = standardised mean difference, SR = systematic review, VAS = visual analogue scale

Table –Home exercise (RA), results and quality assessment

| Outcome (outcome measure) | Study (date) [study type]                         | Standardised result, SMD (95% CI) unless otherwise stated                                                              | Natural result                                                                                                                                                                           | AMSTAR2 quality | Rand. Seq. | Alloc. Conc. | Blind. Part. | Blind. Asses. |
|---------------------------|---------------------------------------------------|------------------------------------------------------------------------------------------------------------------------|------------------------------------------------------------------------------------------------------------------------------------------------------------------------------------------|-----------------|------------|--------------|--------------|---------------|
| Disease activity          | Zernicke (2016) [RCT] <sup>127</sup>              |                                                                                                                        | <u>Disease activity VAS, BL / 12 weeks, mean</u><br>Home conventional exercise: 16 / 20<br>Wii console exercise: 18 / 17                                                                 |                 | H/UC       | H/UC         | H/UC         | H/UC          |
|                           | Seneca (2015) [RCT] <sup>128</sup>                | <u>Home vs supervised, change BL-12 weeks</u><br>SMD 0.89 (0.31, 1.47)                                                 | <u>DAS28, change BL-12 weeks, mean (SD †)</u><br>Supervised exercise: -0.69 (0.85)<br>Home exercise: 0.07 (0.86)                                                                         |                 | H/UC       | H/UC         | H/UC         | L             |
| Tender joints             | Hsieh (2009) [RCT] <sup>129</sup>                 | <u>Home vs supervised exercise at 8 weeks</u><br>SMD -0.24 (-0.96, 0.47)                                               | <u>Tender joint count, BL / 8 weeks, mean (SD)</u><br>Supervised exercise: 16.80 (15.77) / 16.73 (15.91)<br>Home exercise: 14.87 (9.75) / 13.53 (9.46)                                   |                 | L          | L            | H/UC         | L             |
|                           | Neuberger (2007) [RCT] <sup>95</sup>              | <u>Home exercise vs group exercise at 12 weeks</u><br>SMD -0.28 (-0.61, 0.05)                                          | <u>Tender joint count (164), BL / 12 weeks, mean (SD)</u><br>Group exercise: 32.2 (29.1) / 31.0 (29.2)<br>Home exercise: 29.0 (23.1) / 23.7 (23.1)<br>Control: 37.1 (25.1) / 35.1 (26.7) |                 | L          | H/UC         | H/UC         | L             |
|                           | Stenstrom (1994) [RCT] <sup>130</sup>             | <u>Goal setting vs pain attention</u><br>SMD -1.06 (-1.71, -0.41)                                                      | <u>Ritchie index, change BL-24 weeks, mean (SD †)</u><br>Goal setting: -12.5 (9.9)<br>Pain attention: -2.25 (9.4)                                                                        |                 | H/UC       | H/UC         | H/UC         | H/UC          |
|                           | Bespoke meta-analysis including <sup>95,129</sup> | <u>Home exercise vs supervised exercise</u><br>SMD -0.27 (-0.57, 0.02), I <sup>2</sup> 0% [in favour of home exercise] |                                                                                                                                                                                          |                 |            |              |              |               |
| Swollen joints            | Hsieh (2009) [RCT] <sup>129</sup>                 | <u>Home vs supervised exercise at 8 weeks</u><br>SMD -0.29 (-1.01, 0.43)                                               | <u>Swollen joint count, BL / 8 weeks, mean (SD)</u><br>Supervised exercise: 9.07 (10.40) / 8.40 (9.93)<br>Home exercise: 7.00 (4.42) / 6.13 (4.52)                                       |                 | L          | L            | H/UC         | L             |
| Stiffness                 | Siegel (2017) [SR] <sup>69</sup>                  |                                                                                                                        | Identified one previous systematic review <sup>131</sup> that reported home exercise was effective                                                                                       | Moderate        |            |              |              |               |
| Fatigue                   | Neuberger (2007) [RCT] <sup>95</sup>              | <u>Home exercise vs group exercise at 12 weeks</u><br>SMD -0.14 (-0.46, 0.19)                                          | <u>Global fatigue, BL / 12 weeks, mean (SD)</u><br>Group exercise: 24.9 (10.3) / 20.7 (11.6)<br>Home exercise: 20.1 (10.2) / 19.2 (10.6)<br>Control: 21.9 (9.8) / 20.9 (11.2)            |                 | L          | H/UC         | H/UC         | L             |
| Patient global            | Hsieh (2009) [RCT] <sup>129</sup>                 | <u>Home vs supervised exercise at 8 weeks</u><br>SMD -0.62 (-1.35, 0.12)                                               | <u>Patient global, BL / 8 weeks, mean (SD)</u><br>Supervised exercise: 4.01 (1.90) / 2.67 (2.06)<br>Home exercise: 2.44 (2.28) / 1.47 (1.82)                                             |                 | L          | L            | H/UC         | L             |

† mean (SD) estimated from median (range) using published formula<sup>87</sup>

Alloc. Conc. = allocation concealment, AMSTAR2 = Assessing the Methodological Quality of Systematic Reviews, BL = baseline, Blind. Asses. = Blinded assessors, Blind. Part. = blinded participants, CI = confidence interval, DAS28 = disease activity score (28), H/UC = high / unclear risk of bias, L = low risk of bias, RA = rheumatoid arthritis, Rand. Seq. = random sequence generation, RCT = randomised controlled trial, SD = standard deviation, SMD = standardised mean difference VAS = visual analogue scale

Table –Home exercise (RA), results and quality assessment

| Outcome (outcome measure) | Study (date) [study type]                         | Standardised result, SMD (95% CI) unless otherwise stated                                                               | Natural result                                                                                                                                                  | AMSTAR2 quality | Rand. Seq. | Alloc. Conc. | Blind. Part. | Blind. Asses. |
|---------------------------|---------------------------------------------------|-------------------------------------------------------------------------------------------------------------------------|-----------------------------------------------------------------------------------------------------------------------------------------------------------------|-----------------|------------|--------------|--------------|---------------|
| Anxiety                   | Hsieh (2009) [RCT] <sup>129</sup>                 | <u>Home vs supervised exercise at 8 weeks</u><br>SMD -0.13 (-0.85, 0.59)                                                | <u>AIMS anxiety, BL / 8 weeks, mean (SD)</u><br>Supervised exercise: 2.40 (1.72) / 2.07 (1.03)<br>Home exercise: 2.13 (1.30) / 1.93 (1.10)                      |                 | L          | L            | H/UC         | L             |
| Depression                | Hsieh (2009) [RCT] <sup>129</sup>                 | <u>Home vs supervised exercise at 8 weeks</u><br>SMD -0.12 (-0.83, 0.60)                                                | <u>AIMS depression, BL / 8 weeks, mean (SD)</u><br>Supervised exercise: 1.73 (1.03) / 1.73 (1.10)<br>Home exercise: 1.67 (1.05) / 1.60 (1.12)                   |                 | L          | L            | H/UC         | L             |
|                           | Neuberger (2007) [RCT] <sup>95</sup>              | <u>Home exercise vs group exercise at 12 weeks</u><br>SMD -0.36 (-0.69, -0.04)                                          | <u>CES-D, BL / 12 weeks, mean (SD)</u><br>Group exercise: 14.8 (8.1) / 13.7 (9.5)<br>Home exercise: 10.6 (7.7) / 10.5 (8.2)<br>Control: 12.9 (8.6) / 11.7 (9.0) |                 | L          | H/UC         | H/UC         | L             |
|                           | Bespoke meta-analysis including <sup>95,129</sup> | <u>Home exercise vs supervised exercise</u><br>SMD -0.32 (-0.62, -0.02), I <sup>2</sup> 0% [in favour of home exercise] |                                                                                                                                                                 |                 |            |              |              |               |
| Self-efficacy             | Siegel (2017) [SR] <sup>69</sup>                  |                                                                                                                         | Identified one previous systematic review <sup>131</sup> that reported home exercise was effective                                                              | Moderate        |            |              |              |               |
|                           | Hammond (2016) [SR] <sup>126</sup>                |                                                                                                                         | Home exercises improved self-reported self-efficacy in the short-term                                                                                           | Moderate        |            |              |              |               |
| CRP                       | Hsieh (2009) [RCT] <sup>129</sup>                 | <u>Home vs supervised exercise at 8 weeks</u><br>SMD -0.09 (-0.80, 0.63)                                                | <u>CRP, BL / 8 weeks, mean (SD)</u><br>Supervised exercise: 1.66 (2.35) / 1.70 (2.71)<br>Home exercise: 1.55 (1.72) / 1.50 (1.80)                               |                 | L          | L            | H/UC         | L             |
|                           | Neuberger (2007) [RCT] <sup>95</sup>              | <u>Home exercise vs group exercise at 12 weeks</u><br>SMD -0.17 (-0.49, 0.16)                                           | <u>CRP, BL / 12 weeks, mean (SD)</u><br>Group exercise: 1.3 (2.0) / 1.1 (1.4)<br>Home exercise: 1.3 (1.6) / 0.9 (1.0)<br>Control: 1.3 (1.8) / 1.0 (1.2)         |                 | L          | H/UC         | H/UC         | L             |
|                           | Bespoke meta-analysis including <sup>95,129</sup> | <u>Home exercise vs supervised exercise</u><br>SMD -0.15 (-0.45, 0.14), I <sup>2</sup> 0% [in favour of home exercise]  |                                                                                                                                                                 |                 |            |              |              |               |

AIMS = Arthritis Impact Measurement Scales, Alloc. Conc. = allocation concealment, AMSTAR2 = Assessing the Methodological Quality of Systematic Reviews, BL = baseline, Blind. Asses. = Blinded assessors, Blind. Part. = blinded participants, CES-D = Centre for Epidemiologic Studies – Depression scale, CI = confidence interval, CRP = C-reactive protein, H/UC = high / unclear risk of bias, L = low risk of bias, RA = rheumatoid arthritis, Rand. Seq. = random sequence generation, RCT = randomised controlled trial, SD = standard deviation, SMD = standardised mean difference, SR = systematic review

Table – Home exercise (RA), results and quality assessment

| Outcome (outcome measure) | Study (date) [study type]                         | Standardised result, SMD (95% CI) unless otherwise stated                                                               | Natural result                                                                                                                                                                                                                                                                                                                                          | AMSTAR2 quality | Rand. Seq. | Alloc. Conc. | Blind. Part. | Blind. Asses. |
|---------------------------|---------------------------------------------------|-------------------------------------------------------------------------------------------------------------------------|---------------------------------------------------------------------------------------------------------------------------------------------------------------------------------------------------------------------------------------------------------------------------------------------------------------------------------------------------------|-----------------|------------|--------------|--------------|---------------|
| ESR                       | Hsieh (2009) [RCT] <sup>129</sup>                 | <u>Home vs supervised exercise at 8 weeks</u><br>SMD -0.41 (-1.13, 0.32)                                                | <u>ESR, BL / 8 weeks, mean (SD)</u><br>Supervised exercise: 50.00 (31.20) / 53.20 (30.60)<br>Home exercise: 45.70 (31.40) / 40.70 (31.20)                                                                                                                                                                                                               |                 | L          | L            | H/UC         | L             |
|                           | Neuberger (2007) [RCT] <sup>95</sup>              | <u>Home exercise vs group exercise at 12 weeks</u><br>SMD -0.44 (-0.77, -0.11)                                          | <u>ESR, BL / 12 weeks, mean (SD)</u><br>Group exercise: 32.5 (22.7) / 32.0 (24.2)<br>Home exercise: 23.7 (25.6) / 21.9 (21.9)<br>Control: 27.6 (24.1) / 26.8 (23.4)                                                                                                                                                                                     |                 | L          | H/UC         | H/UC         | L             |
|                           | Bespoke meta-analysis including <sup>95;129</sup> | <u>Home exercise vs supervised exercise</u><br>SMD -0.43 (-0.73, -0.13), I <sup>2</sup> 0% [in favour of home exercise] |                                                                                                                                                                                                                                                                                                                                                         |                 |            |              |              |               |
| Grip strength             | Hammond (2016) [SR] <sup>126</sup>                |                                                                                                                         | Home exercises improved grip strength in the short-term                                                                                                                                                                                                                                                                                                 | Moderate        |            |              |              |               |
|                           | Hsieh (2009) [RCT] <sup>129</sup>                 | <u>Home vs supervised exercise at 8 weeks</u><br>SMD 0.37 (-0.35, 1.09)                                                 | <u>Grip strength, BL / 8 weeks, mean (SD)</u><br>Supervised exercise: 10.46 (2.66) / 12.00 (3.70)<br>Home exercise: 12.27 (4.93) / 13.70 (5.37)                                                                                                                                                                                                         |                 | L          | L            | H/UC         | L             |
|                           | Neuberger (2007) [RCT] <sup>95</sup>              | <u>Home exercise vs group exercise at 12 weeks</u><br>Left: SMD 0.10 (-0.23, 0.42)<br>Right: SMD 0.05 (-0.28, 0.37)     | <u>Grip strength, BL / 12 weeks, mean (SD)</u><br><u>Left</u><br>Group exercise: 117.4 (46.8) / 138.8 (54.6)<br>Home exercise: 134.7 (59.4) / 144.7 (63.8)<br>Control: 134.8 (56.6) / 138.1 (59.5)<br><u>Right</u><br>Group exercise: 121.4 (52.4) / 141.8 (56.6)<br>Home exercise: 130.9 (58.7) / 144.8 (64.9)<br>Control: 133.4 (58.7) / 143.0 (60.3) |                 | L          | H/UC         | H/UC         | L             |
|                           | Bespoke meta-analysis including <sup>95;129</sup> | <u>Home exercise vs supervised exercise</u><br>SMD 0.10 (-0.19, 0.40), I <sup>2</sup> 0% [in favour of home exercise]   |                                                                                                                                                                                                                                                                                                                                                         |                 |            |              |              |               |
| Walk-test                 | Hsieh (2009) [RCT] <sup>129</sup>                 | <u>Home vs supervised exercise at 8 weeks</u><br>SMD -0.34 (-1.06, 0.39)                                                | <u>50ft walk test, BL / 8 weeks, mean (SD)</u><br>Supervised exercise: 12.47 (2.66) / 11.58 (2.17)<br>Home exercise: 11.87 (2.11) / 10.90 (1.86)                                                                                                                                                                                                        |                 | L          | L            | H/UC         | L             |
|                           | Neuberger (2007) [RCT] <sup>95</sup>              | <u>Home exercise vs group exercise at 12 weeks</u><br>SMD 0.03 (-0.30, 0.35)                                            | <u>50ft walk test, BL / 12 weeks, mean (SD)</u><br>Group exercise: 10.0 (3.1) / 9.3 (2.8)<br>Home exercise: 9.6 (5.2) / 9.4 (4.4)<br>Control: 9.4 (2.8) / 10.0 (3.9)                                                                                                                                                                                    |                 | L          | H/UC         | H/UC         | L             |
|                           | Bespoke meta-analysis including <sup>95;129</sup> | <u>Home exercise vs supervised exercise</u><br>SMD -0.03 (-0.33, 0.26), I <sup>2</sup> 0% [in favour of home exercise]  |                                                                                                                                                                                                                                                                                                                                                         |                 |            |              |              |               |

Alloc. Conc. = allocation concealment, AMSTAR2 = Assessing the Methodological Quality of Systematic Reviews, BL = baseline, Blind. Asses. = Blinded assessors, Blind. Part. = blinded participants, CI = confidence interval, ESR = erythrocyte sedimentation rate, H/UC = high / unclear risk of bias, L = low risk of bias, RA = rheumatoid arthritis, Rand. Seq. = random sequence generation, RCT = randomised controlled trial, SD = standard deviation, SMD = standardised mean difference, SR = systematic review



*Table – Home exercise (RA), SF36 results at final follow-up, mean (SD)*

| Author (date)                             | PCS         | MCS           | GH | PF | RP | RE | SF | BP | V | MH |
|-------------------------------------------|-------------|---------------|----|----|----|----|----|----|---|----|
| Seneca (2015) [supervised] <sup>128</sup> | 1.5 (6.1) § | 4.0 (6.4) §   |    |    |    |    |    |    |   |    |
| Seneca (2015) [home] <sup>128</sup>       | 4.4 (6.6) § | -0.6 (10.5) § |    |    |    |    |    |    |   |    |

§ change from BL to 12 weeks

BL = baseline, BP = bodily pain, GH = general health, MCS = mental component score, MH = mental health, PCS = physical component score, PF = physical function, RE = role emotional, RP = role physical, SD = standard deviation, SF = social functioning, V = vitality

## Supplementary table 42 – Description of reviews of studies of muscle strengthening exercise in RA

Table – Muscle strengthening exercise (RA), description of reviews

| Authors (date)                 | Review type | Study type included          | Exposure detail                                                           | Number of studies included | Funders                                                                                                                      |
|--------------------------------|-------------|------------------------------|---------------------------------------------------------------------------|----------------------------|------------------------------------------------------------------------------------------------------------------------------|
| Williams (2018) <sup>132</sup> | MA          | RCTs                         | Hand muscle strengthening exercises                                       | 7                          | <b>University</b> (University of Oxford, University of Warwick, University of Ottawa), <b>Government</b> (NIHR, NIHR CLAHRC) |
| Daien (2017) <sup>133</sup>    | SR          | RCTs                         | Hand muscle strengthening exercises and upper extremity exercise training | 2                          | <b>Professional body</b> (EULAR)                                                                                             |
| Siegel (2017) <sup>69</sup>    | SR          | Reviews, RCTs, observational | Muscle strengthening exercise                                             | 2                          | <b>Not reported</b>                                                                                                          |
| Bergstra (2014) <sup>134</sup> | SR          | RCTs                         | Hand muscle strengthening exercises                                       | 8                          | <b>Not reported</b>                                                                                                          |

CLAHRC = Collaboration for Leadership in Applied Health Research & Care, EULAR = European League Against Rheumatism, MA = meta-analysis, NIHR = National Institute for Health Research, RA = rheumatoid arthritis, RCT = randomised controlled trial, SR = systematic review

## Supplementary table 43 – Description of original studies of muscle strengthening exercise in RA

Table – Muscle strengthening exercises (RA), description of included studies

| Author (date) [country]                 | Study design | Inclusion criteria                                                                                                                                                                                                                                                               | Exposure detail                                                                                                                                                                  | N                | Age years, mean (SD)             | N (%) female                   | Funders                                                        |
|-----------------------------------------|--------------|----------------------------------------------------------------------------------------------------------------------------------------------------------------------------------------------------------------------------------------------------------------------------------|----------------------------------------------------------------------------------------------------------------------------------------------------------------------------------|------------------|----------------------------------|--------------------------------|----------------------------------------------------------------|
| Lo (2017) [Hong Kong] <sup>135</sup>    | RCT          | 1987 ACR RA criteria, aged >18 years, symptom duration >1 year<br>Exclusions: Severe joint pain affecting mobility, currently receiving physiotherapy, recent joint injections, change in steroids in last 3 months, poor balance, pain preventing exercise                      | 1) "Nerve mobilisation exercises" – range of motion and stretching exercises<br>p) Joint mobilization exercises not reaching full range of motion                                | 1) 5<br>p) 4     | 1) 55.2 (11.4)<br>p) 59.8 (6.3)  | 1) 5 (100)<br>p) 3 (75.0)      | <b>Not reported</b> - authors declared no conflict of interest |
| Williamson (2017) [UK] <sup>136</sup>   | RCT          | Long-term follow-up. See Lamb et al 2015.                                                                                                                                                                                                                                        | See Lamb et al 2015                                                                                                                                                              | 1) 155<br>p) 173 | 1) 62.9 (11.0)<br>p) 64.3 (10.8) | 1) 77.4%<br>p) 74.0%           | <b>Government</b> (National Institute for Health Research)     |
| Lourenzi (2017) [Brazil] <sup>137</sup> | RCT          | 1987 ACR RA criteria, aged 18-65 years, stable medication for 3 months<br>Exclusions: difficulty understanding assessments, diagnosed with fibromyalgia, joint deformities that does not allow exercises, conditions that contraindicate exercise                                | 1) Progressive muscle strengthening program for 12 weeks<br>p) Waitlist control                                                                                                  | 1) 27<br>p) 33   | 1) 52.6 (7.1)<br>p) 50.9 (8.6)   | 1) 25 (92.6)<br>p) 30 (90.9)   | <b>Charity</b> (Sao Paulo Research Foundation)                 |
| Lamb (2015) [UK] <sup>138</sup>         | RCT          | 1987 ACR RA criteria, active pain and dysfunction in hand, stable DMARDs for 3 months<br>Exclusions: upper limb surgery or fracture in the previous 6 months, pregnancy, waiting upper limb surgery                                                                              | 1) Daily, home-based hand mobility and strength exercises + 6 face-to-face sessions with physio<br>p) Usual care                                                                 | 1) 246<br>p) 242 | 1) 61.3 (12)<br>p) 63.5 (11)     | 1) 188 (76.4)<br>p) 186 (76.9) | <b>Government</b> (National Institute for Health Research)     |
| Manning (2014) [UK] <sup>139</sup>      | RCT          | 1987 ACR RA criteria, aged >18 years, symptom duration ≤5 years, no contraindications for upper extremity exercises<br>Exclusions: intramuscular or upper extremity intraarticular steroid injection in previous 4 weeks, upper extremity surgery/physiotherapy in last 6 months | 1) Exercise circuit of 6 upper extremity exercises selected from set of 16 strengthening exercises. Also participated in group discussion about RA and exercise<br>p) Usual care | 1) 52<br>p) 56   | 1) 53 (16)<br>p) 57 (15)         | 1) 44 (84.6)<br>p) 38 (67.9)   | <b>Charity</b> (Physiotherapy Research Foundation)             |
| Dogu (2013) [Turkey] <sup>140</sup>     | RCT          | 1987 ACR RA criteria, aged 40-70 years, functional class I-III<br>Exclusions: carpal tunnel and cubital syndrome, polyneuropathies, pregnant patients, patients having undergone hand surgery, active arthritis of hand joints                                                   | 1) Isotonic muscle strengthening exercise<br>2) Isometric muscle strengthening exercise                                                                                          | 1) 23<br>p) 24   | 1) 54.9 (9.3)<br>p) 50.4 (9.3)   | 1) 23 (100)<br>p) 24 (100)     | <b>Not reported</b> - authors declared no conflict of interest |

ACR = American College of Rheumatology, DMARDs = Disease Modifying Anti-Rheumatic Drugs, N = number, RA = rheumatoid arthritis, RCT = randomised controlled trial, SD = standard deviation, UK = United Kingdom

Table – Muscle strengthening exercises (RA), description of included studies

| Author (date) [country]                                | Study design | Inclusion criteria                                                                                                                                                                                                                                                                                                                                                                                                  | Exposure detail                                                                                                                                                                                                                                                         | N                       | Age years, mean (SD)                              | N (%) female                                 | Funders                                                                                                                                                               |
|--------------------------------------------------------|--------------|---------------------------------------------------------------------------------------------------------------------------------------------------------------------------------------------------------------------------------------------------------------------------------------------------------------------------------------------------------------------------------------------------------------------|-------------------------------------------------------------------------------------------------------------------------------------------------------------------------------------------------------------------------------------------------------------------------|-------------------------|---------------------------------------------------|----------------------------------------------|-----------------------------------------------------------------------------------------------------------------------------------------------------------------------|
| Lemmey (2012) [UK] <sup>122</sup>                      | RCT          | 1987 ACR RA criteria, aged ≥18 years, functional class I-II, not cognitively impaired, stable drug therapy, steroid dose <10mg/day, Free of other cachectic diseases (e.g. cancer, HIV, infection), free of medical conditions contraindicating regular high intensity exercise, not taking drugs or nutritional supplements known to be anabolic, not undertaking regular, intense physical training, not pregnant | 1) High intensity progressive muscle strengthening training<br>2) Home-based, low-intensity range of motion exercises                                                                                                                                                   | 1) 9<br>p) 9            | 1) 55.7 (8.6)<br>2) 59.4 (10.8)                   | 1) 8 (88.9)<br>p) 6 (66.7)                   | <b>Charity</b> (Arthritis Research Campaign)                                                                                                                          |
| Baillet (2009) [France] <sup>141</sup>                 | RCT          | 1987 ACR RA criteria, treated with DMARDs, ≥45 years.<br>Exclusions: treatment with >10mg glucocorticoid per day, unstable DMARD regime, DAS28 variation >1.2 in past 3 months, aged <18 or >70 years, functional class III or IV, unable to follow educational programme                                                                                                                                           | 1) Training programme designed to improve muscle strength, flexibility, endurance and balance. Exercise of upper and lower limbs performed 5x per week at gym.<br>p) Conventional rehabilitation including lectures on disease management and hydrotherapy              | 1) 25<br>p) 23          | 1) 51.6 (8.3)<br>p) 56.3 (12.8)                   | 1) 21 (84.0)<br>p) 18 (78.3)                 | <b>Not reported</b> - authors declared no conflict of interest                                                                                                        |
| Lemmey (2009) [UK] <sup>123</sup>                      | RCT          | See Lemmey 2012                                                                                                                                                                                                                                                                                                                                                                                                     | 1) High intensity progressive muscle strengthening training<br>2) Home-based, low-intensity range of motion exercises                                                                                                                                                   | 1) 13<br>p) 15          | 1) 55.6 (8.3)<br>2) 60.6 (11.2)                   | 1) 11 (84.6)<br>p) 12 (80.0)                 | <b>Charity</b> (Arthritis Research Campaign)                                                                                                                          |
| Masiero (2007) [Italy] <sup>142</sup>                  | RCT          | 1987 ACR RA criteria, treated with anti-tumour necrosis factor agent, aged 18-65 years, stable drug therapy for 6 months, no severe disability<br>Exclusions: participation in previous educational program, changes to drug treatment during trial, rehabilitation treatment / orthopaedic surgery during trial                                                                                                    | 1) Home based exercise program including upper and lower stretching and range of motion exercises as well as information on pathophysiology of RA, pain and stress mechanisms, importance of rest, principles of joint protection, assistive equipment<br>p) Usual care | 1) 36<br>p) 34          | 1) 54.2 (9.8)<br>p) 52.2 (11.9)                   | 1) 29 (80.6)<br>p) 28 (82.4)                 | <b>Not reported</b>                                                                                                                                                   |
| O'Brien (2006) [UK] <sup>143</sup>                     | RCT          | Aged >18 years, 1987 ACR RA criteria, stable DMARDs for 3 months<br>Exclusions: >7.5mg/day steroids or intramuscular injection within 1 month                                                                                                                                                                                                                                                                       | 1) Received joint protection leaflet + instructions on how to perform 8 strengthening and mobilizing hand exercises<br>2) Received joint protection leaflet + instructions for 8 stretching exercises<br>p) Non-exercise control                                        | 1) 21<br>2) 24<br>p) 22 | 1) 62.3 (10.0)<br>2) 57.3 (8.2)<br>p) 59.5 (12.9) | 1) 15 (71.4)<br>2) 15 (62.5)<br>p) 16 (72.7) | <b>Industry</b> (Promedics, UK), <b>Professional body</b> (Birmingham Branch of the Chartered Society of Physiotherapy), <b>Charity</b> (Arthritis Research Campaign) |
| Buljina (2001) [Bosnia and Herzegovina] <sup>144</sup> | RCT          | Aged 20-70 years, 1987 ACR RA criteria, symptom duration ≥6 months, ≥3 swollen joints on both hands, ≥5 tender joints on both hands, decreased range of hand motion, ESR >25                                                                                                                                                                                                                                        | 1) Resistive hand exercises – 20-30 minutes, radon baths and wax bath treatments<br>p) Waitlist control                                                                                                                                                                 | 1) 50<br>p) 50          | 1) 47.9 (11.2)<br>p) 48.5 (10.7)                  | 1) 38 (76.0)<br>p) 37 ( 74.0)                | <b>Not reported</b>                                                                                                                                                   |
| Scholten (1999) [Austria] <sup>145</sup>               | RCT          | Definite RA                                                                                                                                                                                                                                                                                                                                                                                                         | 1) Feasible therapeutic exercises preserving axis of joints and reinforcing weakened muscles<br>p) Waitlist control                                                                                                                                                     | 1) 38<br>p) 30          | 48.3 (5.6)                                        | 54 (79.4)                                    | <b>Government</b> (Mayor of Vienna grant)                                                                                                                             |

ACR = American College of Rheumatology, DMARDs = Disease Modifying Anti-Rheumatic Drugs, ESR = erythrocyte sedimentation rate, HIV = Human Immunodeficiency Virus, N = number, RA = rheumatoid arthritis, RCT = randomised controlled trial, SD = standard deviation, UK = United Kingdom, USA = United States of America

Table – Muscle strengthening exercises (RA), description of included studies

| Author (date) [country]                        | Study design    | Inclusion criteria                                                                                                                                                                                                                                                                                        | Exposure detail                                                                                                                                                                                | N                               | Age years, mean (SD)                           | N (%) female                 | Funders                                                                                                                                                                                                                   |
|------------------------------------------------|-----------------|-----------------------------------------------------------------------------------------------------------------------------------------------------------------------------------------------------------------------------------------------------------------------------------------------------------|------------------------------------------------------------------------------------------------------------------------------------------------------------------------------------------------|---------------------------------|------------------------------------------------|------------------------------|---------------------------------------------------------------------------------------------------------------------------------------------------------------------------------------------------------------------------|
| Bostrom (1998) [Sweden] <sup>146</sup>         | RCT             | 1987 ACR RA criteria, aged >20 years, pain in shoulder/arm region and/or functional limitations in shoulder region                                                                                                                                                                                        | 1) Dynamic shoulder arm resistive exercises<br>2) Static shoulder arm resistive exercises                                                                                                      | 1) 17<br>p) 20                  | Mean (range)<br>1) 59 (42-74)<br>p) 56 (24-74) | 1) 17 (100)<br>p) 20 (100)   | <b>University</b> (Karolinska), <b>Professional body</b> (Swedish Association against Rheumatism), <b>Government</b> (Swedish Medical Research Council, Swedish Foundation for Health Care Sciences and Allergy Research) |
| Komatireddy (1997) [USA] <sup>147</sup>        | RCT             | Classical or definite RA, mild to moderate disease activity, ACR functional class II-III<br>Exclusions: symptomatic chest pain, abnormal electrocardiograms and stress tests, symptomatic dyspnea or prior pulmonary function abnormalities                                                               | 1) Moderate intensity exercise using weights, dumbbells, elastic bands, 2x per week for four weeks and then increased to 3x per week<br>p) No exercise                                         | 1) 24<br>p) 25                  | 1) 60.5 (11)<br>p) 57.7 (9.8)                  | 1) 17 (70.8)<br>p) 20 (80.0) | <b>University</b> (University of Missouri-Columbia)                                                                                                                                                                       |
| Hoening (1993) [USA] <sup>148</sup>            | RCT             | Definite or classical RA, stable medication for 6 weeks, functional class II-III                                                                                                                                                                                                                          | 1) Range of motion hand exercises<br>2) Muscle strengthening hand exercises<br>3) Range of motion + muscle strengthening hand exercises<br>p) Control – encourage to maintain active lifestyle | 1) 11<br>2) 9<br>3) 10<br>p) 11 | Not reported                                   | Not reported                 | <b>Charity</b> (Bassett Research Foundation), <b>Industry</b> (Fred Sammons, Inc.)                                                                                                                                        |
| Dellhag (1992) [Sweden] <sup>149</sup>         | RCT             | Resident of Gothenburg, aged <70 years, symptom duration 6-10 years, functional class I-II, hand problems, seropositive<br>Exclusions: other diagnoses                                                                                                                                                    | 1) Eight different hand exercises using soft exercise ball<br>p) Non-exercise control                                                                                                          | 1) 11<br>p) 13                  | Women: 51.8<br>Men: 56.3                       | Not reported                 | <b>Professional body</b> (Swedish Rheumatism Association)                                                                                                                                                                 |
| Marcora (2005) [UK] <sup>150</sup>             | NRT             | 1987 ACR RA criteria, functional class I-II, aged ≥18 years, no cognitive impairment, stable drug therapy for past 3 months, free of other cachectic diseases and any condition preventing safe participation in the study, no participation in another regular or intense exercise program, not pregnant | 1) Progressive muscle strengthening training for 12 weeks<br>p) Usual care                                                                                                                     | 1) 10<br>p) 10                  | 1) 53 (13)<br>p) 54 (10)                       | 1) 6 (60.0)<br>p) 6 (60.0)   | <b>Government</b> (Wales Office of Research and Development for Health and Social Care)                                                                                                                                   |
| Goksel Karatepe (2011) [Turkey] <sup>151</sup> | Single arm int. | 1987 ACR RA criteria, stable disease for 3 months, low-moderate disease activity, functional class I-II, no significant cardiovascular disease, no recent joint replacement surgery, no planned lower extremity surgery, did not participate in regular exercise before program                           | 4 weeks home based exercise – strengthening and range of motion, twice daily                                                                                                                   | 28                              | 52.9 (8.6)                                     | 25 (89.3)                    | <b>Not reported</b>                                                                                                                                                                                                       |

ACR = American College of Rheumatology, N = number, NRT = Non-randomised trial, RA = rheumatoid arthritis, RCT = randomised controlled trial, SD = standard deviation, UK = United Kingdom, USA = United States of America

## Supplementary table 44 – Results from reviews and interventional studies of muscle strengthening exercise in RA

Table – Muscle strengthening exercise (RA), results and quality assessment

| Outcome (outcome measure) | Study (date) [study type]                                      | Standardised result, SMD (95% CI) unless otherwise stated                                                                                                                                                                   | Natural result                                                                                                                                        | AMSTAR2 quality | Rand. Seq. | Alloc. Conc. | Blind. Part. | Blind. Asses. |
|---------------------------|----------------------------------------------------------------|-----------------------------------------------------------------------------------------------------------------------------------------------------------------------------------------------------------------------------|-------------------------------------------------------------------------------------------------------------------------------------------------------|-----------------|------------|--------------|--------------|---------------|
| Pain                      | Williams (2018) [MA] <sup>132</sup>                            |                                                                                                                                                                                                                             | <u>Pain, Mean difference (95% CI)</u><br>-3.70 (-8.10, 0.70)                                                                                          | High            |            |              |              |               |
|                           | Siegel (2017) [SR] <sup>69</sup>                               |                                                                                                                                                                                                                             | 1 MA <sup>152</sup> reported no improvement in pain (MD -4.13 [-10.97, 2.71])                                                                         | Moderate        |            |              |              |               |
|                           | Bergstra (2014) [SR] <sup>134</sup>                            |                                                                                                                                                                                                                             | No significant increase in pain                                                                                                                       | Low             |            |              |              |               |
|                           | Lo (2017) [RCT] <sup>135</sup>                                 | <u>Exercise vs control (effect size reversed – negative scores in favour of exercise)</u><br>SMD -0.77 (-2.15, 0.61)                                                                                                        | <u>RA pain scale (high scores are better), BL / 4 weeks, mean (SD) ‡</u><br>Exercise: 93.8 (13.2) / 110.2 (16.2)<br>Control: 109 (19.9) / 96.8 (18.9) |                 | H/UC       | H/UC         | H/UC         | H/UC          |
|                           | Lourenzi (2017) [RCT] <sup>137</sup>                           | <u>Exercise vs control at 12 months</u><br>SMD -0.27 (-0.78, 0.24)                                                                                                                                                          | <u>Pain VAS, 6 months / 12 months, mean (SD)</u><br>Exercise: 4.3 (1.6) / 3.4 (1.9)<br>Control: 3.9 (1.8) / 3.9 (1.8)                                 |                 | L          | L            | H/UC         | L             |
|                           | Lamb (2015) [RCT] <sup>138</sup>                               | <u>Hand Exercise vs control, mean change BL-12 weeks</u><br>SMD -0.11 (-0.28, 0.07)                                                                                                                                         | <u>MHQ Pain, change from BL – 12 months, mean (SD) †</u><br>Hand exercise: -8.26 (20.5)<br>Control: -6.01 (21.6)                                      |                 | L          | L            | H/UC         | L             |
|                           | Manning (2014) [RCT] <sup>139</sup>                            | <u>Exercise vs control, change from BL-12 months</u><br>SMD -0.41 (-0.80, -0.03)                                                                                                                                            | <u>Pain, change BL-12 weeks, mean (SD) †</u><br>Exercise: -13.8 (36.4)<br>Control: 1.7 (38.4)                                                         |                 | L          | L            | H/UC         | L             |
|                           | Dogu (2013) [RCT] <sup>140</sup>                               | <u>Isotonic vs isometric exercise, change from BL-6 weeks</u><br>SMD 0.09 (-0.48, 0.66)                                                                                                                                     | <u>Pain VAS, Change BL-6 weeks, mean (SD)</u><br>Isotonic: -1.26 (2.68)<br>Isometric: -1.04 (2.13)                                                    |                 | L          | H/UC         | H/UC         | L             |
|                           | Masiero (2007) [RCT] <sup>142</sup>                            |                                                                                                                                                                                                                             | <u>Pain VAS, BL / 8 months, mean (SD)</u><br>Exercise: 46 (21.6) / 36.9 (26.3)<br>Control: 39 (26.9) / 4.2 (16.4) [sic]                               |                 | H/UC       | H/UC         | H/UC         | L             |
|                           | Buljina (2001) [RCT] <sup>144</sup>                            | <u>Hand exercise vs control at 4 weeks</u><br>SMD -2.21 (-2.71, -1.71)                                                                                                                                                      | <u>Pain VAS, BL / 4 weeks, mean (SD)</u><br>Hand exercises: 66.4 (17.0) / 32.4 (14.8)<br>Control: 67.6 (17.5) / 70.0 (19.0)                           |                 | L          | H/UC         | H/UC         | H/UC          |
|                           | Bostrom (1998) [RCT] <sup>146</sup>                            | <u>Dynamic vs static exercise at 10 weeks</u><br>SMD -0.21 (-0.86, 0.44)                                                                                                                                                    | <u>Shoulder pain at rest, BL / 10 weeks, mean (SD) §</u><br>Dynamic: 1.3 (1.9) / 0.5 (1.2)<br>Static: 0.9 (1.6) / 0.8 (1.6)                           |                 | H/UC       | H/UC         | H/UC         | L             |
|                           | Komatireddy (1997) [RCT] <sup>147</sup>                        | <u>Exercise vs control at 12 weeks</u><br>SMD -0.21 (-0.77, 0.35)                                                                                                                                                           | <u>Pain, BL / 12 weeks, mean (SD)</u><br>Exercise: 3.5 (1.6) / 4.2 (2.6)<br>Control: 4.0 (2.2) / 4.7 (2.2)                                            |                 | H/UC       | H/UC         | H/UC         | L             |
|                           | Dellhag (1992) [RCT] <sup>149</sup>                            |                                                                                                                                                                                                                             | <u>Hand pain when moving, BL / 4 weeks, mean</u><br>Exercise: 28.8 / 17.0<br>Control: 27.7 / 33.1                                                     |                 | H/UC       | H/UC         | H/UC         | H/UC          |
|                           | Bespoke meta-analysis including <sup>135;137;138;144;147</sup> | <u>Exercise vs control</u><br>SMD -0.68 (-1.55, 0.19), I <sup>2</sup> 94%<br>Removing outlier <sup>144</sup> : SMD -0.06 (-0.22, 0.10), I <sup>2</sup> 0%<br>Non-hand exercises: SMD -0.28 (-0.64, 0.09), I <sup>2</sup> 0% |                                                                                                                                                       |                 |            |              |              |               |

§ Mean (SD) estimated from median (interquartile range) using published formula<sup>97</sup>, † SD calculated from 95% confidence interval,

Alloc. Conc. = allocation concealment, AMSTAR2 = Assessing the Methodological Quality of Systematic Reviews, BL = baseline, Blind. Asses. = Blinded assessors, Blind. Part. = blinded participants, CI = confidence interval, H/UC = high / unclear risk of bias, L = low risk of bias, RA = rheumatoid arthritis, Rand. Seq. = random sequence generation, RCT = randomised controlled trial, SD = standard deviation, SMD = standardised mean difference

Table – Muscle strengthening exercise (RA), results and quality assessment

| Outcome (outcome measure) | Study (date) [study type]              | Standardised result, SMD (95% CI) unless otherwise stated                                                                                                                                               | Natural result                                                                                                                                                                | AMSTAR2 quality | Rand. Seq. | Alloc. Conc. | Blind. Part. | Blind. Asses. |
|---------------------------|----------------------------------------|---------------------------------------------------------------------------------------------------------------------------------------------------------------------------------------------------------|-------------------------------------------------------------------------------------------------------------------------------------------------------------------------------|-----------------|------------|--------------|--------------|---------------|
| Function                  | Williams (2018) [MA] <sup>132</sup>    | <u>Exercise vs control, short term</u><br>SMD 0.79 (0.42, 1.17)                                                                                                                                         |                                                                                                                                                                               | High            |            |              |              |               |
|                           | Siegel (2017) [SR] <sup>69</sup>       |                                                                                                                                                                                                         | 1 MA <sup>152</sup> reported improvements in function (MD -0.22 [-0.35, -0.10])                                                                                               | Moderate        |            |              |              |               |
|                           | Williamson (2017) [RCT] <sup>136</sup> | <u>Exercise vs control at 26 months</u><br>SMD 0.09 (-0.13, 0.30)                                                                                                                                       | SF12 (physical), change from BL – 26 months, mean (SD †)<br>Hand exercise: 0.19 (8.6)<br>Control: -0.51 (7.7)                                                                 |                 | L          | L            | H/UC         | L             |
|                           | Lourenzi (2017) [RCT] <sup>137</sup>   | <u>Exercise vs control at 12 months</u><br>SMD -0.37 (-0.89, 0.14)                                                                                                                                      | HAQ, 6 months / 12 months, mean (SD)<br>Exercise: 0.88 (0.54) / 0.69 (0.49)<br>Control: 0.90 (0.48) / 0.87 (0.48)                                                             |                 | L          | L            | H/UC         | L             |
|                           | Lamb (2015) [RCT] <sup>138</sup>       | <u>Hand Exercise vs control, mean change BL-12 weeks</u><br>SMD 0.15 (-0.03, 0.33)                                                                                                                      | SF12 (physical), change from BL – 12 months, mean (SD †)<br>Hand exercise: 1.19 (7.64)<br>Control: 0.03 (7.90)                                                                |                 | L          | L            | H/UC         | L             |
|                           | Dogu (2013) [RCT] <sup>140</sup>       | <u>Isotonic vs isometric exercise, change from BL-6 weeks</u><br>SMD -0.06 (-0.64, 0.51)                                                                                                                | Duroz Hand Function Index, Change BL-6 weeks, mean (SD)<br>Isotonic: 2.83 (3.71)<br>Isometric: 3.06 (3.60)                                                                    |                 | L          | H/UC         | H/UC         | L             |
|                           | Baillet (2009) [RCT] <sup>141</sup>    | <u>Exercise vs control at 12 months</u><br>SMD 0.00 (-0.57, 0.57)                                                                                                                                       | HAQ, BL / 1 month, mean (SD)<br>Exercise: 0.9 (0.6) / 0.7 (0.6)<br>Control: 0.7 (0.5) / 0.7 (0.6)                                                                             |                 | L          | L            | H/UC         | L             |
|                           | Lemmey (2009) [RCT] <sup>123</sup>     | <u>Exercise vs control at 24 weeks</u><br>SMD 0.38 (-0.37, 1.13)                                                                                                                                        | HAQ, BL / 24 weeks, mean (SD)<br>Exercise: 0.91 (0.68) / 0.82 (0.69)<br>Control: 0.58 (0.62) / 0.58 (0.59)                                                                    |                 | L          | H/UC         | H/UC         | H/UC          |
|                           | Masiero (2007) [RCT] <sup>142</sup>    | <u>Exercise vs control at 8 months</u><br>SMD -0.63 (-1.11, -0.15)                                                                                                                                      | HAQ, BL / 8 months, mean (SD)<br>Exercise: 1.20 (0.56) / 0.93 (0.44)<br>Control: 1.17 (0.57) / 1.24 (0.54)                                                                    |                 | H/UC       | H/UC         | H/UC         | L             |
|                           | O'Brien (2006) [RCT] <sup>143</sup>    | <u>Muscle strengthening hand exercise vs control, change from BL-6 months</u><br>SMD 1.13 (0.49, 1.78)<br><u>Stretching hand exercise vs control, change from BL-6 months</u><br>SMD 0.09 (-0.49, 0.67) | AIMS upper limb function, change BL-6 months, mean (SD)<br>Muscle strengthening hand exercise: 1.00 (1.07)<br>Stretching hand exercise: -0.18 (1.54)<br>Control: -0.30 (1.22) |                 | L          | L            | H/UC         | L             |

† SD calculated from 95% confidence interval, ‡ Mean (SD) calculated by reviewers from data in the paper

Alloc. Conc. = allocation concealment, AMSTAR2 = Assessing the Methodological Quality of Systematic Reviews, BL = baseline, Blind. Asses. = Blinded assessors, Blind. Part. = blinded participants, CI = confidence interval, H/UC = high / unclear risk of bias, HAQ = Health Assessment Questionnaire, L = low risk of bias, RA = rheumatoid arthritis, Rand. Seq. = random sequence generation, RCT = randomised controlled trial, SD = standard deviation, SMD = standardised mean difference

Table – Muscle strengthening exercise (RA), results and quality assessment

| Outcome (outcome measure) | Study (date) [study type]                                              | Standardised result, SMD (95% CI) unless otherwise stated                                                                                        | Natural result                                                                                                          | AMSTAR2 quality | Rand. Seq. | Alloc. Conc. | Blind. Part. | Blind. Asses. |
|---------------------------|------------------------------------------------------------------------|--------------------------------------------------------------------------------------------------------------------------------------------------|-------------------------------------------------------------------------------------------------------------------------|-----------------|------------|--------------|--------------|---------------|
| Function                  | Scholten (1999) [RCT] <sup>145</sup>                                   | <u>Exercise vs control at 1 year</u><br>SMD -0.78 (-1.27, -0.28)                                                                                 | <u>HAQ (score 1-5), BL / 1 year, mean (SD)</u><br>Exercise: 2.6 (0.78) / 2.2 (0.32)<br>Control: 2.9 (0.62) / 2.6 (0.69) |                 | H/UC       | H/UC         | H/UC         | H/UC          |
|                           | Bostrom (1998) [RCT] <sup>146</sup>                                    | <u>Dynamic vs static exercise at 10 weeks</u><br>SMD 0.25 (-0.40, 0.90)                                                                          | <u>HAQ, BL / 10 weeks, mean (SD §)</u><br>Dynamic: 1.21 (0.36) / 1.11 (0.45)<br>Static: 1.19 (0.49) / 0.97 (0.64)       |                 | H/UC       | H/UC         | H/UC         | L             |
|                           | Komatireddy (1997) [RCT] <sup>147</sup>                                | <u>Exercise vs control at 12 weeks</u><br>SMD 0.58 (0.01, 1.15)                                                                                  | <u>HAQ, BL / 12 weeks, mean (SD)</u><br>Exercise: 13.0 (7.5) / 8.9 (6.6)<br>Control: 5.8 (5.8) / 5.0 (6.8)              |                 | H/UC       | H/UC         | H/UC         | L             |
|                           | Bespoke meta-analysis including <sup>123;137;138;141-143;145;147</sup> | <u>Exercise vs control</u><br>SMD -0.27 (-0.60, 0.05), I <sup>2</sup> 73.8%<br>Non-hand exercises: SMD -0.17 (-0.60, 0.26), I <sup>2</sup> 72.9% |                                                                                                                         |                 |            |              |              |               |
|                           | Goksel Karatepe (2011) [single arm int.] <sup>151</sup>                |                                                                                                                                                  | <u>HAQ, BL / 4 weeks, mean (SD)</u><br>1.6 (0.8) / 1.2 (0.7)                                                            |                 |            |              |              |               |
|                           | Marcora (2005) [NRT] <sup>150</sup>                                    | <u>Exercise vs control at 12 weeks</u><br>SMD 0.00 (-0.88, 0.88)                                                                                 | <u>MHAQ, BL / 12 weeks, mean (SD)</u><br>Exercise: 1.3 (0.3) / 1.3 (0.2)<br>Control: 1.5 (0.6) / 1.3 (0.4)              |                 |            |              |              |               |

§ Mean (SD) estimated from median (interquartile range) using published formula<sup>87</sup>,

Alloc. Conc. = allocation concealment, AMSTAR2 = Assessing the Methodological Quality of Systematic Reviews, BL = baseline, Blind. Asses. = Blinded assessors, Blind. Part. = blinded participants, CI = confidence interval, H/UC = high / unclear risk of bias, HAQ = Health Assessment Questionnaire, L = low risk of bias, NRT = non-randomised trial, RA = rheumatoid arthritis, Rand. Seq. = random sequence generation, RCT = randomised controlled trial, SD = standard deviation, SMD = standardised mean difference



Table – Muscle strengthening exercise (RA), results and quality assessment

| Outcome (outcome measure) | Study (date) [study type]                                  | Standardised result, SMD (95% CI) unless otherwise stated                                | Natural result                                                                                                             | AMSTAR2 quality | Rand. Seq. | Alloc. Conc. | Blind. Part. | Blind. Asses. |
|---------------------------|------------------------------------------------------------|------------------------------------------------------------------------------------------|----------------------------------------------------------------------------------------------------------------------------|-----------------|------------|--------------|--------------|---------------|
| Disease activity          | Bergstra (2014) [SR] <sup>134</sup>                        |                                                                                          | 2/3 studies found no association between hand exercise and disease activity                                                | Low             |            |              |              |               |
|                           | Lourenzi (2017) [RCT] <sup>137</sup>                       | <u>Exercise vs control at 12 months</u><br>SMD -0.11 (-0.62, 0.40)                       | <u>DAS28, 6 months / 12 months, mean (SD)</u><br>Exercise: 3.93 (1.21) / 3.67 (1.17)<br>Control: 3.94 (1.06) / 3.79 (0.99) |                 | L          | L            | H/UC         | L             |
|                           | Manning (2014) [RCT] <sup>139</sup>                        | <u>Exercise vs control, change from BL-12 months</u><br>SMD -0.33 (-0.71, 0.05)          | <u>DAS28, change BL-12 weeks, mean (SD †)</u><br>Exercise: -0.8 (2.2)<br>Control: -0.1 (2.1)                               |                 | L          | L            | H/UC         | L             |
|                           | Dogu (2013) [RCT] <sup>140</sup>                           | <u>Isotonic vs isometric exercise, change from BL-6 weeks</u><br>SMD -0.08 (-0.66, 0.49) | <u>DAS28, Change BL-6 weeks, mean (SD)</u><br>Isotonic: -0.70 (1.08)<br>Isometric: -0.78 (0.80)                            |                 | L          | H/UC         | H/UC         | L             |
|                           | Baillet (2009) [RCT] <sup>141</sup>                        | <u>Exercise vs control at 12 months</u><br>SMD -0.11 (-0.67, 0.46)                       | <u>DAS28, BL / 1 month, mean (SD)</u><br>Exercise: 4.9 (1.4) / 3.8 (2.1)<br>Control: 4.0 (1.7) / 4.0 (1.6)                 |                 | L          | L            | H/UC         | L             |
|                           | Lemmey (2009) [RCT] <sup>123</sup>                         | <u>Exercise vs control at 24 weeks</u><br>SMD -0.42 (-1.17, 0.33)                        | <u>DAS28, BL / 24 weeks, mean (SD)</u><br>Exercise: 3.29 (1.27) / 3.12 (1.34)<br>Control: 3.28 (1.27) / 3.56 (0.71)        |                 | L          | H/UC         | H/UC         | H/UC          |
|                           | Bespoke meta-analysis including <sup>123;137;139;141</sup> | <u>Exercise vs control</u><br>SMD -0.24 (-0.49, 0.01), I <sup>2</sup> 0%                 |                                                                                                                            |                 |            |              |              |               |
|                           | Marcora (2005) [NRT] <sup>150</sup>                        | <u>Exercise vs control at 12 weeks</u><br>SMD 0.21 (-1.09, 0.67)                         | <u>RADAI, BL / 12 weeks, mean (SD)</u><br>Exercise: 2.5 (1.1) / 2.0 (1.4)<br>Control: 2.8 (1.7) / 2.3 (1.5)                |                 |            |              |              |               |
|                           | Goksel Karatepe (2011) [single arm int.] <sup>151</sup>    |                                                                                          | <u>DAS28, BL / 4 weeks, mean (SD)</u><br>4.4 (1.2) / 4.0 (1.2)                                                             |                 |            |              |              |               |

† SD calculated from 95% confidence interval

Alloc. Conc. = allocation concealment, AMSTAR2 = Assessing the Methodological Quality of Systematic Reviews, BL = baseline, Blind. Asses. = Blinded assessors, Blind. Part. = blinded participants, CI = confidence interval, DAS28 = Disease Activity Score 28, H/UC = high / unclear risk of bias, L = low risk of bias, NRT = non-randomised trial, RA = rheumatoid arthritis, RADAI = Rheumatoid Arthritis Disease Activity Index, Rand. Seq. = random sequence generation, RCT = randomised controlled trial, SD = standard deviation, SMD = standardised mean difference

Table – Muscle strengthening exercise (RA), results and quality assessment

| Outcome (outcome measure) | Study (date) [study type]                              | Standardised result, SMD (95% CI) unless otherwise stated                                                                                                                                                 | Natural result                                                                                                                                                                                        | AMSTAR2 quality | Rand. Seq. | Alloc. Conc. | Blind. Part. | Blind. Asses. |
|---------------------------|--------------------------------------------------------|-----------------------------------------------------------------------------------------------------------------------------------------------------------------------------------------------------------|-------------------------------------------------------------------------------------------------------------------------------------------------------------------------------------------------------|-----------------|------------|--------------|--------------|---------------|
| Joint count               | Siegel (2017) [SR] <sup>69</sup>                       |                                                                                                                                                                                                           | 1 MA <sup>152</sup> reported improvements in joint count (MD -5.36 [-9.00, -1.72])                                                                                                                    | Moderate        |            |              |              |               |
| Tender joints             | Lamb (2015) [RCT] <sup>138</sup>                       | <u>Hand Exercise vs control, mean change BL-12 weeks</u><br>SMD 0.03 (-0.14, 0.21)                                                                                                                        | <u>Tender joint count, change from BL – 12 months, mean (SD †)</u><br>Hand Exercise: -0.96 (5.8)<br>Control: -1.15 (5.7)                                                                              |                 | L          | L            | H/UC         | L             |
|                           | Masiero (2007) [RCT] <sup>142</sup>                    |                                                                                                                                                                                                           | <u>Ritchie index, BL / 8 months, mean</u><br>Exercise: 18.8 / 17.9<br>Control: 21.4 / 22.1                                                                                                            |                 | H/UC       | H/UC         | H/UC         | L             |
|                           | O'Brien (2006) [RCT] <sup>143</sup>                    | <u>Muscle strengthening hand exercise vs control, change from BL-6 months</u><br>SMD 0.00 (-0.60, 0.60)<br><u>Stretching hand exercise vs control, change from BL-6 months</u><br>SMD -0.38 (-0.96, 0.21) | <u>Tender joint count, BL / 6 months, mean (SD)</u><br>Muscle strengthening hand exercise: 5.1 (5.8) / 2.5 (3.7)<br>Stretching hand exercise: 3.4 (5.8) / 1.2 (2.1)<br>Control: 2.0 (2.5) / 2.5 (4.5) |                 | L          | L            | H/UC         | L             |
|                           | Buljina (2001) [RCT] <sup>144</sup>                    | <u>Hand exercise vs control at 4 weeks</u><br>SMD -1.47 (-1.91, -1.03)                                                                                                                                    | <u>Hand Articular Index, BL / 4 weeks, mean (SD)</u><br>Hand exercises: 8.8 (3.5) / 4.2 (2.5)<br>Control: 8.4 (3.3) / 8.5 (3.3)                                                                       |                 | L          | H/UC         | H/UC         | H/UC          |
|                           | Bostrom (1998) [RCT] <sup>146</sup>                    | <u>Dynamic vs static exercise at 10 weeks</u><br>SMD -0.40 (-1.05, 0.25)                                                                                                                                  | <u>Ritchie Index, BL / 10 weeks, mean (SD §)</u><br>Dynamic: 6.2 (5.3) / 6.8 (5.3)<br>Static: 8.9 (5.7) / 8.6 (3.7)                                                                                   |                 | H/UC       | H/UC         | H/UC         | L             |
|                           | Bespoke meta-analysis including <sup>138;143;144</sup> | <u>Exercise vs control</u><br>SMD -0.48 (-1.46, 0.51), I <sup>2</sup> 94.8%                                                                                                                               |                                                                                                                                                                                                       |                 |            |              |              |               |

§ Mean (SD) estimated from median (interquartile range) using published formula<sup>87</sup>

† SD calculated from 95% confidence interval

Alloc. Conc. = allocation concealment, AMSTAR2 = Assessing the Methodological Quality of Systematic Reviews, BL = baseline, Blind. Asses. = Blinded assessors, Blind. Part. = blinded participants, CI = confidence interval, H/UC = high / unclear risk of bias, L = low risk of bias, RA = rheumatoid arthritis, Rand. Seq. = random sequence generation, RCT = randomised controlled trial, SD = standard deviation, SMD = standardised mean difference

Table – Muscle strengthening exercise (RA), results and quality assessment

| Outcome (outcome measure) | Study (date) [study type]                                  | Standardised result, SMD (95% CI) unless otherwise stated                                                                                                                                                  | Natural result                                                                                                                                                                                         | AMSTAR2 quality | Rand. Seq. | Alloc. Conc. | Blind. Part. | Blind. Asses. |
|---------------------------|------------------------------------------------------------|------------------------------------------------------------------------------------------------------------------------------------------------------------------------------------------------------------|--------------------------------------------------------------------------------------------------------------------------------------------------------------------------------------------------------|-----------------|------------|--------------|--------------|---------------|
| Swollen joints            | Lamb (2015) [RCT] <sup>138</sup>                           | <u>Hand Exercise vs control, mean change BL-12 weeks</u><br>SMD -0.02 (-0.20, 0.16)                                                                                                                        | <u>Swollen joint count, change from BL – 12 months, mean (SD †)</u><br>Hand exercise: -1.13 (4.5)<br>Control: -1.02 (5.4)                                                                              |                 | L          | L            | H/UC         | L             |
|                           | O'Brien (2006) [RCT] <sup>143</sup>                        | <u>Muscle strengthening hand exercise vs control, change from BL-6 months</u><br>SMD -0.26 (-0.86, 0.35)<br><u>Stretching hand exercise vs control, change from BL-6 months</u><br>SMD -0.51 (-1.10, 0.07) | <u>Swollen joint count, BL / 6 months, mean (SD)</u><br>Muscle strengthening hand exercise: 3.5 (3.0) / 2.3 (3.5)<br>Stretching hand exercise: 3.0 (3.6) / 1.4 (1.8)<br>Control: 3.1 (4.6) / 3.3 (5.6) |                 | L          | L            | H/UC         | L             |
|                           | Buljina (2001) [RCT] <sup>144</sup>                        | <u>Hand exercise vs control at 4 weeks</u><br>SMD -0.49 (-0.88, -0.09)                                                                                                                                     | <u>PIP joint size, BL / 4 weeks, mean (SD)</u><br>Hand exercises: 21.2 (3.5) / 19.6 (3.3)<br>Control: 20.6 (3.4) / 21.2 (3.3)                                                                          |                 | L          | H/UC         | H/UC         | H/UC          |
|                           | Bostrom (1998) [RCT] <sup>146</sup>                        | <u>Dynamic vs static exercise at 10 weeks</u><br>SMD 0.07 (-0.58, 0.71)                                                                                                                                    | <u>Swollen joint count, BL / 10 weeks, mean (SD §)</u><br>Dynamic: 9.5 (7.7) / 7.3 (4.9)<br>Static: 11.7 (8.4) / 7.0 (4.4)                                                                             |                 | H/UC       | H/UC         | H/UC         | L             |
|                           | Komatireddy (1997) [RCT] <sup>147</sup>                    | <u>Exercise vs control at 12 weeks</u><br>SMD -0.73 (-1.30, -0.15)                                                                                                                                         | <u>Swollen joint count, BL / 12 weeks, mean (SD)</u><br>Exercise: 7.9 (6.3) / 6.8 (8.6)<br>Control: 11.6 (8.8) / 15.8 (15.2)                                                                           |                 | H/UC       | H/UC         | H/UC         | L             |
|                           | Bespoke meta-analysis including <sup>138;143;144;147</sup> | <u>Exercise vs control</u><br>SMD -0.20 (-0.46, 0.07), I <sup>2</sup> 45.5%                                                                                                                                |                                                                                                                                                                                                        |                 |            |              |              |               |
| Fatigue                   | Manning (2014) [RCT] <sup>139</sup>                        | <u>Exercise vs control, change from BL-12 weeks</u><br>SMD -0.23 (-0.61, 0.15)                                                                                                                             | <u>Fatigue VAS, change BL-12 weeks, mean (SD †)</u><br>Exercise: -7.9 (38.4)<br>Control: 1.2 (39.5)                                                                                                    |                 | L          | L            | H/UC         | L             |
|                           | Komatireddy (1997) [RCT] <sup>147</sup>                    | <u>Exercise vs control at 12 weeks</u><br>SMD -0.19 (-0.75, 0.38)                                                                                                                                          | <u>Fatigue, BL / 12 weeks, mean (SD)</u><br>Exercise: 3.7 (1.8) / 4.5 (2.4)<br>Control: 4.6 (2.5) / 4.9 (1.9)                                                                                          |                 | H/UC       | H/UC         | H/UC         | L             |
|                           | Bespoke meta-analysis including <sup>139;147</sup>         | <u>Exercise vs control</u><br>SMD -0.22 (-0.53, 0.10), I <sup>2</sup> 0%                                                                                                                                   |                                                                                                                                                                                                        |                 |            |              |              |               |
|                           | Marcora (2005) [NRT] <sup>150</sup>                        | <u>Exercise vs control at 12 weeks</u><br>SMD -0.47 (-1.36, 0.42)                                                                                                                                          | <u>Fatigue VAS, BL / 12 weeks, mean (SD)</u><br>Exercise: 4.4 (1.8) / 3.1 (2.1)<br>Control: 4.9 (3.2) / 4.4 (3.3)                                                                                      |                 |            |              |              |               |

§ Mean (SD) estimated from median (interquartile range) using published formula<sup>87</sup>

† SD calculated from 95% confidence interval

Alloc. Conc. = allocation concealment, AMSTAR2 = Assessing the Methodological Quality of Systematic Reviews, BL = baseline, Blind. Asses. = Blinded assessors, Blind. Part. = blinded participants, CI = confidence interval, H/UC = high / unclear risk of bias, L = low risk of bias, NRT = non-randomised trial, PIP = proximal interphalangeal joint, RA = rheumatoid arthritis, Rand. Seq. = random sequence generation, , RCT = randomised controlled trial, SD = standard deviation, SMD = standardised mean difference, VAS = Visual Analogue Scale

Table – Muscle strengthening exercise (RA), results and quality assessment

| Outcome (outcome measure) | Study (date) [study type]                               | Standardised result, SMD (95% CI) unless otherwise stated                                                                                                                                                  | Natural result                                                                                                                                                                                                           | AMSTAR2 quality | Rand. Seq. | Alloc. Conc. | Blind. Part. | Blind. Asses. |
|---------------------------|---------------------------------------------------------|------------------------------------------------------------------------------------------------------------------------------------------------------------------------------------------------------------|--------------------------------------------------------------------------------------------------------------------------------------------------------------------------------------------------------------------------|-----------------|------------|--------------|--------------|---------------|
| Patient global            | O'Brien (2006) [RCT] <sup>143</sup>                     | <u>Muscle strengthening hand exercise vs control, change from BL-6 months</u><br>SMD -0.02 (-0.62, 0.58)<br><u>Stretching hand exercise vs control, change from BL-6 months</u><br>SMD -0.35 (-0.93, 0.24) | <u>Patient global assessment, BL / 6 months, mean (SD)</u><br>Muscle strengthening hand exercise: 4.71 (2.12) / 4.25 (2.41)<br>Stretching hand exercise: 3.95 (2.62) / 3.41 (2.52)<br>Control: 3.37 (1.63) / 4.31 (2.71) |                 | L          | L            | H/UC         | L             |
| QoL                       | Williamson (2017) [RCT] <sup>136</sup>                  | <u>Exercise vs control at 26 months</u><br>SMD 0.00 (-0.22, 0.22)                                                                                                                                          | <u>EQ5D, change from BL – 26 months, mean (SD †)</u><br>Hand exercise: -0.01 (0.25)<br>Control: -0.01 (0.23)                                                                                                             |                 | L          | L            | H/UC         | L             |
|                           | Lamb (2015) [RCT] <sup>138</sup>                        | <u>Hand Exercise vs control, mean change BL-12 weeks</u><br>SMD 0.04 (-0.14, 0.22)                                                                                                                         | <u>EQ5D, change from BL – 12 months, mean (SD †)</u><br>Hand exercise: 0.03 (0.24)<br>Control: 0.02 (0.28)                                                                                                               |                 | L          | L            | H/UC         | L             |
|                           | Manning (2014) [RCT] <sup>139</sup>                     | <u>Exercise vs control, change from BL-12 weeks</u><br>SMD -0.09 (-0.47, 0.29)                                                                                                                             | <u>RAQOL, change BL-12 weeks, mean (SD †)</u><br>Exercise: -1.4 (7.0)<br>Control: -0.8 (6.7)                                                                                                                             |                 | L          | L            | H/UC         | L             |
|                           | Dogu (2013) [RCT] <sup>140</sup>                        | <u>Isotonic vs isometric exercise, change from BL-6 weeks</u><br>SMD -0.27 (-0.85, 0.31)                                                                                                                   | <u>RAQOL, Change BL-6 weeks, mean (SD)</u><br>Isotonic: -4.09 (5.14)<br>Isometric: -6.04 (8.76)                                                                                                                          |                 | L          | H/UC         | H/UC         | L             |
|                           | Baillet (2009) [RCT] <sup>141</sup>                     | <u>Exercise vs control at 12 months</u><br>SMD -0.30 (-0.87, 0.27)                                                                                                                                         | <u>AIMS2-SF, BL / 1 month, mean (SD)</u><br>Exercise: 21.2 (5.6) / 18.0 (5.7)<br>Control: 19.6 (4.9) / 19.9 (7.1)                                                                                                        |                 | L          | L            | H/UC         | L             |
|                           | Bespoke meta-analysis including <sup>138;139;141</sup>  | <u>Exercise vs control</u><br>SMD -0.01 (-0.16, 0.15), I <sup>2</sup> 0%                                                                                                                                   |                                                                                                                                                                                                                          |                 |            |              |              |               |
|                           | Goksel Karatepe (2011) [single arm int.] <sup>151</sup> |                                                                                                                                                                                                            | <u>RAQOL, BL / 4 weeks, mean (SD)</u><br>20.8 (7.9) 18.0 (8.5)                                                                                                                                                           |                 |            |              |              |               |

† SD calculated from 95% confidence interval

AIMS2-SF = Arthritis Impact Score 2 – Short Form, Alloc. Conc. = allocation concealment, AMSTAR2 = Assessing the Methodological Quality of Systematic Reviews, BL = baseline, Blind. Asses. = Blinded assessors, Blind. Part. = blinded participants, CI = confidence interval, H/UC = high / unclear risk of bias, L = low risk of bias, QoL = Quality of life, RA = rheumatoid arthritis, Rand. Seq. = random sequence generation, RAQOL = Rheumatoid Arthritis Quality of Life Index, RCT = randomised controlled trial, SD = standard deviation, SMD = standardised mean difference

Table – Muscle strengthening exercise (RA), results and quality assessment

| Outcome (outcome measure) | Study (date) [study type]                              | Standardised result, SMD (95% CI) unless otherwise stated                                                                                                 | Natural result                                                                                                                                                                                                                                    | AMSTAR2 quality | Rand. Seq. | Alloc. Conc. | Blind. Part. | Blind. Asses. |
|---------------------------|--------------------------------------------------------|-----------------------------------------------------------------------------------------------------------------------------------------------------------|---------------------------------------------------------------------------------------------------------------------------------------------------------------------------------------------------------------------------------------------------|-----------------|------------|--------------|--------------|---------------|
| Depression                | Williamson (2017) [RCT] <sup>136</sup>                 | <u>Exercise vs control at 26 months</u><br>SMD 0.01 (-0.21, 0.22)                                                                                         | <u>SF12 (mental), change from BL – 26 months, mean (SD †)</u><br>Hand exercise: 0.27 (9.6)<br>Control: 0.21 (9.7)                                                                                                                                 |                 | L          | L            | H/UC         | L             |
|                           | Lamb (2015) [RCT] <sup>138</sup>                       | <u>Hand Exercise vs control, mean change BL-12 weeks</u><br>SMD 0.16 (-0.02, 0.34)                                                                        | <u>SF12 (mental), change from BL – 12 months, mean (SD †)</u><br>Hand exercise: 2.19 (11.5)<br>Control: 0.41 (10.3)                                                                                                                               |                 | L          | L            | H/UC         | L             |
|                           | Scholten (1999) [RCT] <sup>145</sup>                   | <u>Exercise vs control at 1 year</u><br>SMD -0.54 (-1.03, -0.05)                                                                                          | <u>Beck Depression Inventory, BL / 1 year, mean (SD)</u><br>Exercise: 12.1 (6.2) / 9.6 (2.3)<br>Control: 12.0 (6.4) / 12.1 (6.5)                                                                                                                  |                 | H/UC       | H/UC         | H/UC         | H/UC          |
|                           | Komatireddy (1997) [RCT] <sup>147</sup>                | <u>Exercise vs control at 12 weeks</u><br>SMD -0.25 (-0.81, 0.31)                                                                                         | <u>AIMS, BL / 12 weeks, mean (SD)</u><br>Exercise: 2.1 (1.3) / 1.6 (0.8)<br>Control: 2.0 (1.4) / 1.9 (1.5)                                                                                                                                        |                 | H/UC       | H/UC         | H/UC         | L             |
|                           | Bespoke meta-analysis including <sup>138;145;147</sup> | <u>Exercise vs control</u><br>SMD -0.21 (-0.38, -0.05), I <sup>2</sup> 1.7%                                                                               |                                                                                                                                                                                                                                                   |                 |            |              |              |               |
| Anxiety                   | Komatireddy (1997) [RCT] <sup>147</sup>                | <u>Exercise vs control at 12 weeks</u><br>SMD -0.06 (-0.62, 0.50)                                                                                         | <u>AIMS, BL / 12 weeks, mean (SD)</u><br>Exercise: 4.0 (1.9) / 3.2 (1.4)<br>Control: 3.3 (1.3) / 3.3 (2.0)                                                                                                                                        |                 | H/UC       | H/UC         | H/UC         | L             |
| Self-efficacy             | Williamson (2017) [RCT] <sup>136</sup>                 | <u>Exercise vs control at 26 months</u><br>SMD 0.19 (-0.02, 0.41)                                                                                         | <u>ASES, change from BL – 26 months, mean (SD †)</u><br>Hand exercise: 2.96 (18.6)<br>Control: 0.22 (17.2)                                                                                                                                        |                 | L          | L            | H/UC         | L             |
|                           | Lamb (2015) [RCT] <sup>138</sup>                       | <u>Hand Exercise vs control, mean change BL-12 weeks</u><br>SMD 0.19 (0.02, 0.37)                                                                         | <u>ASES, change from BL – 12 months, mean (SD †)</u><br>Hand exercise: 5.19 (21.9)<br>Control: 1.11 (20.2)                                                                                                                                        |                 | L          | L            | H/UC         | L             |
|                           | Manning (2014) [RCT] <sup>139</sup>                    | <u>Exercise vs control, change from BL-12 weeks</u><br>Pain SMD 0.36 (-0.02, 0.74)<br>Function SMD 0.31 (-0.07, 0.69)<br>Symptoms: SMD 0.32 (-0.06, 0.70) | <u>ASES, change BL-12 weeks, mean (SD †)</u><br><i>Pain</i><br>Exercise: 4.8 (29.2)<br>Control: -5.7 (28.6)<br><i>Function</i><br>Exercise: 2.6 (23.9)<br>Control: -4.7 (23.5)<br><i>Symptoms</i><br>Exercise: 4.6 (28.3)<br>Control: -4.7 (29.4) |                 | L          | L            | H/UC         | L             |

† SD calculated from 95% confidence interval

Alloc. Conc. = allocation concealment, AMSTAR2 = Assessing the Methodological Quality of Systematic Reviews, ASES = Arthritis Self-Efficacy Scale, BL = baseline, Blind. Asses. = Blinded assessors, Blind. Part. = blinded participants, CI = confidence interval, H/UC = high / unclear risk of bias, L = low risk of bias, RA = rheumatoid arthritis, Rand. Seq. = random sequence generation, RCT = randomised controlled trial, RoM = range of motion, SD = standard deviation, SMD = standardised mean difference

Table – Muscle strengthening exercise (RA), results and quality assessment

| Outcome (outcome measure) | Study (date) [study type]                              | Standardised result, SMD (95% CI) unless otherwise stated                           | Natural result                                                                                                                  | AMSTAR2 quality | Rand. Seq. | Alloc. Conc. | Blind. Part. | Blind. Asses. |
|---------------------------|--------------------------------------------------------|-------------------------------------------------------------------------------------|---------------------------------------------------------------------------------------------------------------------------------|-----------------|------------|--------------|--------------|---------------|
| Morning stiffness         | Manning (2014) [RCT] <sup>139</sup>                    | <u>Exercise vs control, change from BL-12 weeks</u><br>SMD -0.24 (-0.62, 0.14)      | <u>Morning stiffness (mins), change BL-12 weeks, mean (SD †)</u><br>Exercise: -115.9 (492.5)<br>Control: 4.1 (510.9)            |                 | L          | L            | H/UC         | L             |
|                           | Komatireddy (1997) [RCT] <sup>147</sup>                | <u>Exercise vs control at 12 weeks</u><br>SMD -0.17 (-0.73, 0.39)                   | <u>Morning stiffness (hours), BL / 12 weeks, mean (SD)</u><br>Exercise: 1.0 (0.8) / 0.9 (0.9)<br>Control: 1.1 (1.4) / 1.1 (1.4) |                 | H/UC       | H/UC         | H/UC         | L             |
|                           | Bespoke meta-analysis including <sup>139;147</sup>     | <u>Exercise vs control</u><br>SMD -0.22 (-0.53, 0.10), I <sup>2</sup> 0%            |                                                                                                                                 |                 |            |              |              |               |
| CRP                       | Lo (2017) [RCT] <sup>135</sup>                         | <u>Exercise vs control at 4 weeks</u><br>SMD -0.42 (-1.75, 0.92)                    | <u>CRP, BL / 4 weeks, mean (SD) ‡</u><br>Exercise: 5.9 (4.9) / 2.7 (2.7)<br>Control: 3.5 (1.6) / 5.1 (8.2)                      |                 | H/UC       | H/UC         | H/UC         | H/UC          |
|                           | Lamb (2015) [RCT] <sup>138</sup>                       | <u>Hand Exercise vs control, mean change BL-12 weeks</u><br>SMD -0.02 (-0.19, 0.16) | <u>CRP [log], change from BL – 12 months, mean (SD) †</u><br>Hand Exercise: -0.14 (1.2)<br>Control: -0.12 (1.3)                 |                 | L          | L            | H/UC         | L             |
|                           | Bespoke meta-analysis including <sup>135;138</sup>     | <u>Exercise vs control</u><br>SMD -0.02 (-0.20, 0.15), I <sup>2</sup> 0%            |                                                                                                                                 |                 |            |              |              |               |
| ESR                       | Siegel (2017) [SR] <sup>69</sup>                       |                                                                                     | 1 MA <sup>152</sup> reported improvement in ESR (MD -5.17 [-8.77, -1.58])                                                       | Moderate        |            |              |              |               |
|                           | Lo (2017) [RCT] <sup>135</sup>                         | <u>Exercise vs control at 4 weeks</u><br>SMD -0.46 (-1.80, 0.88)                    | <u>CRP, BL / 4 weeks, mean (SD) ‡</u><br>Exercise: 21 (14) / 16.8 (11.8)<br>Control: 19 (11.5) / 23.5 (17.6)                    |                 | H/UC       | H/UC         | H/UC         | H/UC          |
|                           | Lamb (2015) [RCT] <sup>138</sup>                       | <u>Hand Exercise vs control, mean change BL-12 weeks</u><br>SMD 0.06 (-0.12, 0.24)  | <u>ESR [log], change from BL – 12 months, mean (SD) †</u><br>Hand Exercise: -0.04 (1.1)<br>Control: -0.10 (1.0)                 |                 | L          | L            | H/UC         | L             |
|                           | Buljina (2001) [RCT] <sup>144</sup>                    | <u>Hand exercise vs control at 4 weeks</u><br>SMD -0.49 (-0.89, -0.10)              | <u>ESR, BL / 4 weeks, mean (SD)</u><br>Hand exercises: 39.6 (15.0) / 34.2 (12.2)<br>Control: 40.3 (14.8) / 41.0 (15.2)          |                 | L          | H/UC         | H/UC         | H/UC          |
|                           | Bespoke meta-analysis including <sup>135;138;144</sup> | <u>Exercise vs control</u><br>SMD -0.21 (-0.67, 0.25), I <sup>2</sup> 69.3%         |                                                                                                                                 |                 |            |              |              |               |
|                           | Marcora (2005) [NRT] <sup>150</sup>                    | <u>Exercise vs control at 12 weeks</u><br>SMD -0.29 (-1.18, 0.59)                   | <u>ESR, BL / 12 weeks, mean (SD)</u><br>Exercise: 18.8 (16.6) / 16.7 (8.9)<br>Control: 22.5 (17.6) / 20.9 (18.1)                |                 |            |              |              |               |

† SD calculated from 95% confidence interval, ‡ Mean (SD) calculated by reviewers from data in the paper

Alloc. Conc. = allocation concealment, AMSTAR2 = Assessing the Methodological Quality of Systematic Reviews, BL = baseline, Blind. Asses. = Blinded assessors, Blind. Part. = blinded participants, CI = confidence interval, CRP = C-reactive protein, ESR = erythrocyte sedimentation rate, H/UC = high / unclear risk of bias, L = low risk of bias, MA = meta-analysis, NRT = non-randomised trial, RA = rheumatoid arthritis, Rand. Seq. = random sequence generation, RCT = randomised controlled trial, SD = standard deviation, SMD = standardised mean difference

Table – Muscle strengthening exercise (RA), results and quality assessment

| Outcome (outcome measure) | Study (date) [study type]            | Standardised result, SMD (95% CI) unless otherwise stated                                                                                                                                                | Natural result                                                                                                                                                                                                                                                        | AMSTAR2 quality | Rand. Seq. | Alloc. Conc. | Blind. Part. | Blind. Asses. |
|---------------------------|--------------------------------------|----------------------------------------------------------------------------------------------------------------------------------------------------------------------------------------------------------|-----------------------------------------------------------------------------------------------------------------------------------------------------------------------------------------------------------------------------------------------------------------------|-----------------|------------|--------------|--------------|---------------|
| Grip strength             | Williams (2018) [MA] <sup>132</sup>  | <u>Exercise vs control</u><br>SMD 0.46 (0.13, 0.80)                                                                                                                                                      |                                                                                                                                                                                                                                                                       | High            |            |              |              |               |
|                           | Daïen (2017) [SR] <sup>133</sup>     |                                                                                                                                                                                                          | <u>Hand grip</u><br>2 studies reported benefits of exercise interventions on muscle strength                                                                                                                                                                          | Low             |            |              |              |               |
|                           | Bergstra (2014) [SR] <sup>134</sup>  |                                                                                                                                                                                                          | 6/7 studies reported improvements in grip strength                                                                                                                                                                                                                    | Low             |            |              |              |               |
|                           | Lourenzi (2017) [RCT] <sup>137</sup> | <u>Exercise vs control at 12 months</u><br>Right SMD 0.35 (-0.16, 0.86)<br>Left SMD 0.15 (-0.36, 0.66)                                                                                                   | <u>Grip strength, 6 months / 12 months, mean (SD)</u><br><i>Right hand</i><br>Exercises: 17.39 (10.46) / 18.13 (8.58)<br>Control: 15.23 (10.05) / 14.69 (10.82)<br><i>Left hand</i><br>Exercises: 16.13 (9.42) / 16.59 (8.15)<br>Control: 15.33 (7.81) / 15.39 (7.52) |                 | L          | L            | H/UC         | L             |
|                           | Lamb (2015) [RCT] <sup>138</sup>     | <u>Hand Exercise vs control, mean change BL-12 weeks</u><br>SMD 0.13 (-0.04, 0.31)                                                                                                                       | <u>Grip strength, change from BL – 12 months, mean (SD †)</u><br>Hand exercise: 15.77 (45.3)<br>Control: 9.57 (46.9)                                                                                                                                                  |                 | L          | L            | H/UC         | L             |
|                           | Manning (2014) [RCT] <sup>139</sup>  | <u>Exercise vs control, change from BL-12 weeks</u><br>SMD 0.14 (-0.24, 0.52)                                                                                                                            | <u>Grip strength, change BL-12 weeks, mean (SD †)</u><br>Exercise: 16.8 (91.8)<br>Control: 3.7 (92.8)                                                                                                                                                                 |                 | L          | L            | H/UC         | L             |
|                           | Dogu (2013) [RCT] <sup>140</sup>     | <u>Isotonic vs isometric exercise, change from BL-6 weeks</u><br>SMD -0.42 (-0.99, 0.16)                                                                                                                 | <u>Dominant grip strength, Change BL-6 weeks, mean (SD)</u><br>Isotonic: 0.56 (2.62)<br>Isometric: 2.04 (4.28)                                                                                                                                                        |                 | L          | H/UC         | H/UC         | L             |
|                           | O'Brien (2006) [RCT] <sup>143</sup>  | <u>Muscle strengthening hand exercise vs control, change from BL-6 months</u><br>SMD 0.37 (-0.24, 0.97)<br><u>Stretching hand exercise vs control, change from BL-6 months</u><br>SMD 0.17 (-0.41, 0.75) | <u>Grip strength, change BL-6 months, mean (SD)</u><br>Muscle strengthening hand exercise: 9.70 (11.50)<br>Stretching hand exercise: 6.70 (17.35)<br>Control: 3.40 (21.32)                                                                                            |                 | L          | L            | H/UC         | L             |

† SD calculated from 95% confidence interval

Alloc. Conc. = allocation concealment, AMSTAR2 = Assessing the Methodological Quality of Systematic Reviews, BL = baseline, Blind. Asses. = Blinded assessors, Blind. Part. = blinded participants, CI = confidence interval, H/UC = high / unclear risk of bias, L = low risk of bias, RA = rheumatoid arthritis, Rand. Seq. = random sequence generation, RCT = randomised controlled trial, SD = standard deviation, SMD = standardised mean difference

Table – Muscle strengthening exercise (RA), results and quality assessment

| Outcome (outcome measure) | Study (date) [study type]                                      | Standardised result, SMD (95% CI) unless otherwise stated                                                                                                                                                                                                         | Natural result                                                                                                                                                                                                                                                                                                                                                                                                                                                  | AMSTAR2 quality                                                                                                     | Rand. Seq. | Alloc. Conc. | Blind. Part. | Blind. Asses. |
|---------------------------|----------------------------------------------------------------|-------------------------------------------------------------------------------------------------------------------------------------------------------------------------------------------------------------------------------------------------------------------|-----------------------------------------------------------------------------------------------------------------------------------------------------------------------------------------------------------------------------------------------------------------------------------------------------------------------------------------------------------------------------------------------------------------------------------------------------------------|---------------------------------------------------------------------------------------------------------------------|------------|--------------|--------------|---------------|
| Grip strength             | Buljina (2001) [RCT] <sup>144</sup>                            | <u>Hand exercise vs control at 4 weeks</u><br>Right hand: SMD 0.49 (0.09, 0.89)<br>Left hand: SMD 0.50 (0.10, 0.90)                                                                                                                                               | <u>Grip strength, BL / 4 weeks, mean (SD)</u><br><i>Right hand</i><br>Hand exercises: 15.0 (8.7) / 19.8 (9.4)<br>Control: 15.6 (8.7) / 15.3 (8.9)<br><i>Left hand</i><br>Hand exercises: 14.4 (8.2) / 18.5 (8.8)<br>Control: 14.3 (7.9) / 14.3 (8.0)                                                                                                                                                                                                            |                                                                                                                     | L          | H/UC         | H/UC         | H/UC          |
|                           | Komatireddy (1997) [RCT] <sup>147</sup>                        | <u>Exercise vs control at 12 weeks</u><br>SMD -0.12 (-0.68, 0.44)                                                                                                                                                                                                 | <u>Grip strength, BL / 12 weeks, mean (SD)</u><br>Exercise: 35.9 (20.0) / 44.2 (22.0)<br>Control: 43.7 (26.7) / 46.7 (20.8)                                                                                                                                                                                                                                                                                                                                     |                                                                                                                     | H/UC       | H/UC         | H/UC         | L             |
|                           | Hoenig (1993) [RCT] <sup>148</sup>                             | <u>Hand muscle strengthening exercise vs control at 3 months</u><br>Right: SMD 0.02 (-0.86, 0.90)<br>Left: SMD 0.11 (-0.77, 0.99)<br><u>Hand RoM + muscle strengthening vs control at 3 months</u><br>Right SMD 0.26 (-0.60, 1.12)<br>Left SMD 0.23 (-0.63, 1.09) | <u>Grip strength, BL / 3 months, mean (SD)</u><br><i>Right hand</i><br>RoM: 93.4 (58.0) / 85.5 (43.8)<br>Muscle strengthening: 69.3 (43.3) / 82.1 (43.0)<br>RoM + muscle strengthening: 84.2 (61.5) / 97.6 (68.4)<br>Control: 68.2 (36.7) / 81.1 (60.1)<br><i>Left hand</i><br>RoM: 70.4 (44.0) / 84.0 (47.5)<br>muscle strengthening: 62.0 (32.8) / 87.4 (44.6)<br>RoM + muscle strengthening: 83.2 (62.1) / 96.8 (71.6)<br>Control: 83.0 (64.9) / 81.1 (64.7) |                                                                                                                     | L          | H/UC         | H/UC         | L             |
|                           | Dellhag (1992) [RCT] <sup>149</sup>                            |                                                                                                                                                                                                                                                                   | <u>Grip strength, BL / 4 weeks, mean</u><br>Exercise: 90.7 / 109.7<br>Control: 82.6 / 85.4                                                                                                                                                                                                                                                                                                                                                                      |                                                                                                                     | H/UC       | H/UC         | H/UC         | H/UC          |
|                           | Bespoke meta-analysis including <sup>137-139;143;144;148</sup> | <u>Exercise vs control</u><br>SMD 0.18 (0.05, 0.32)                                                                                                                                                                                                               |                                                                                                                                                                                                                                                                                                                                                                                                                                                                 |                                                                                                                     |            |              |              |               |
|                           | Marcora (2005) [NRT] <sup>150</sup>                            | <u>Exercise vs control at 12 weeks</u><br>SMD 0.16 (-0.72, 1.04)                                                                                                                                                                                                  |                                                                                                                                                                                                                                                                                                                                                                                                                                                                 | <u>Grip strength, BL / 12 weeks, mean (SD)</u><br>Exercise: 187 (108) / 224 (115)<br>Control: 223 (133) / 204 (135) |            |              |              |               |

Alloc. Conc. = allocation concealment, AMSTAR2 = Assessing the Methodological Quality of Systematic Reviews, BL = baseline, Blind. Asses. = Blinded assessors, Blind. Part. = blinded participants, CI = confidence interval, H/UC = high / unclear risk of bias, L = low risk of bias, NRT = non-randomised trial, RA = rheumatoid arthritis, Rand. Seq. = random sequence generation, RCT = randomised controlled trial, RoM = range of motion, SD = standard deviation, SMD = standardised mean difference



Table – Muscle strengthening exercise (RA), results and quality assessment

| Outcome (outcome measure) | Study (date) [study type]               | Standardised result, SMD (95% CI) unless otherwise stated         | Natural result                                                                                                           | AMSTAR2 quality | Rand. Seq. | Alloc. Conc. | Blind. Part. | Blind. Asses. |
|---------------------------|-----------------------------------------|-------------------------------------------------------------------|--------------------------------------------------------------------------------------------------------------------------|-----------------|------------|--------------|--------------|---------------|
| Walk-test                 | Lemmey (2012) [RCT] <sup>122</sup>      | <u>Exercise vs control at 3 years</u><br>SMD -0.20 (-1.13, 0.73)  | <u>50ft walk, BL / 3 years, mean (SD)</u><br>Exercise: 9.68 (2.77) / 8.50 (1.77)<br>Control: 8.80 (2.96) / 9.06 (3.51)   |                 | L          | H/UC         | H/UC         | H/UC          |
|                           | Lemmey (2009) [RCT] <sup>123</sup>      | <u>Exercise vs control at 24 weeks</u><br>SMD -0.65 (-1.41, 0.12) | <u>50ft walk, BL / 24 weeks, mean (SD)</u><br>Exercise: 9.33 (2.40) / 7.77 (1.40)<br>Control: 10.03 (3.78) / 9.89 (4.28) |                 | L          | H/UC         | H/UC         | H/UC          |
|                           | Komatireddy (1997) [RCT] <sup>147</sup> | <u>Exercise vs control at 12 weeks</u><br>SMD 0.02 (-0.54, 0.58)  | <u>50m walk time, BL / 12 weeks, mean (SD)</u><br>Exercise: 12.4 (3.2) / 12.4 (3.2)<br>Control: 12.0 (4.0) / 12.3 (8.3)  |                 | H/UC       | H/UC         | H/UC         | L             |

Alloc. Conc. = allocation concealment, AMSTAR2 = Assessing the Methodological Quality of Systematic Reviews, BL = baseline, Blind. Asses. = Blinded assessors, Blind. Part. = blinded participants, CI = confidence interval, H/UC = high / unclear risk of bias, L = low risk of bias, RA = rheumatoid arthritis, Rand. Seq. = random sequence generation, RCT = randomised controlled trial, RoM = range of motion, SD = standard deviation, SMD = standardised mean difference

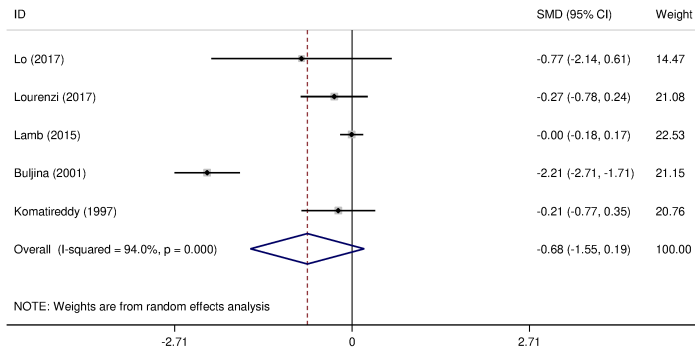

Figure – The effect of muscle strengthening exercise on pain (RA)

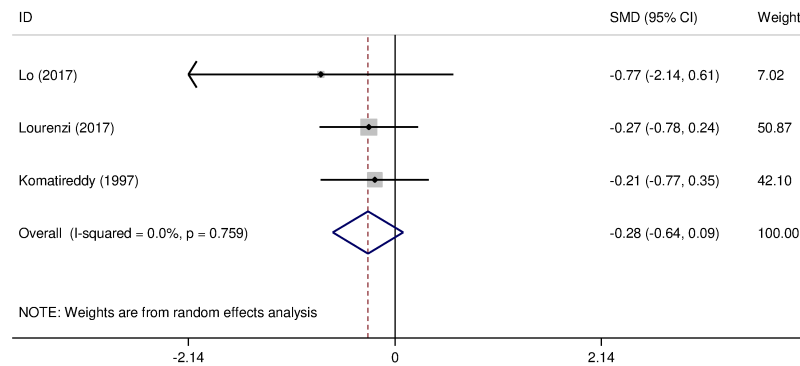

Figure – The effect of muscle strengthening exercise on pain (RA), only including non-hand muscle strengthening exercises

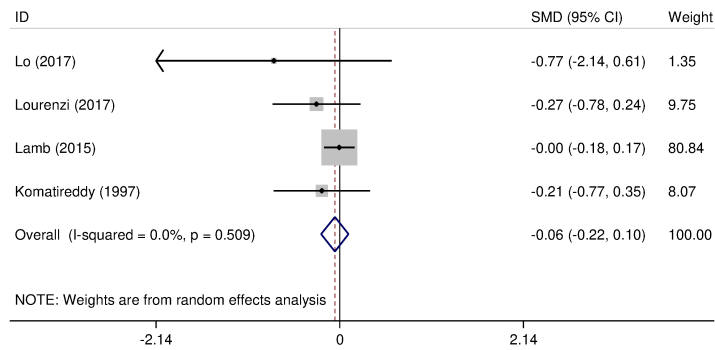

Figure – The effect of muscle strengthening exercise on pain (RA), excluding 1 outlier

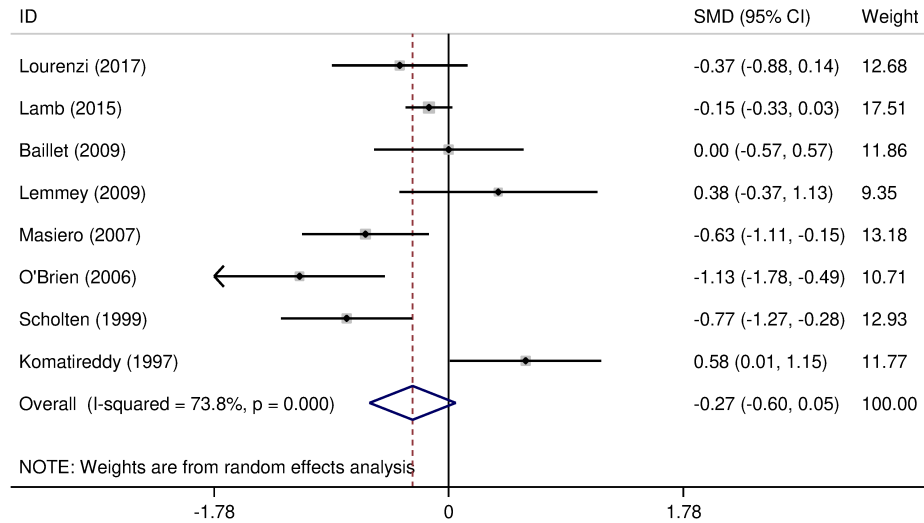

Figure – The effect of muscle strengthening exercise on function (RA)

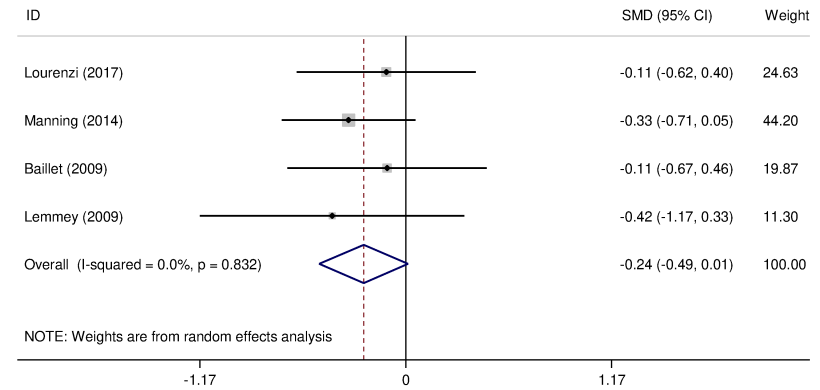

Figure – The effect of muscle strengthening exercise on disease activity (RA)

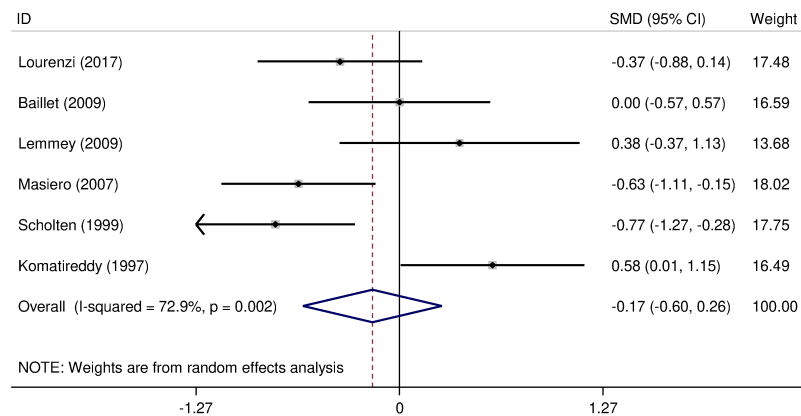

Figure – The effect of muscle strengthening exercise on function (RA), non-hand exercises only

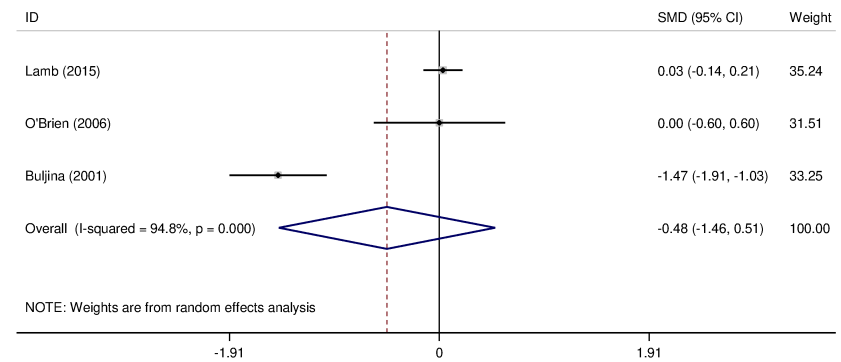

Figure – The effect of muscle strengthening exercise on tender joint count (RA)

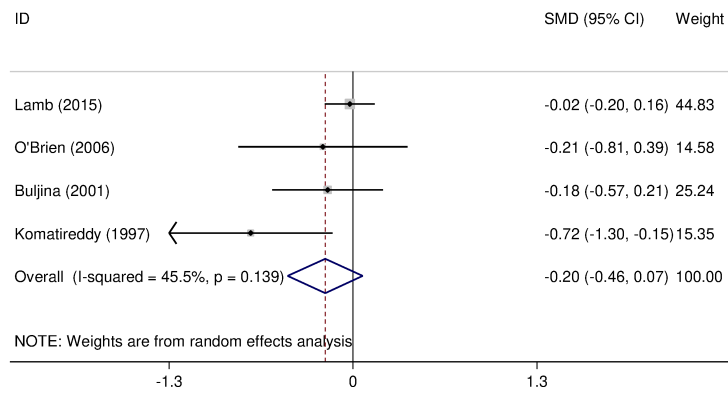

Figure – The effect of muscle strengthening exercise on swollen joint count (RA)

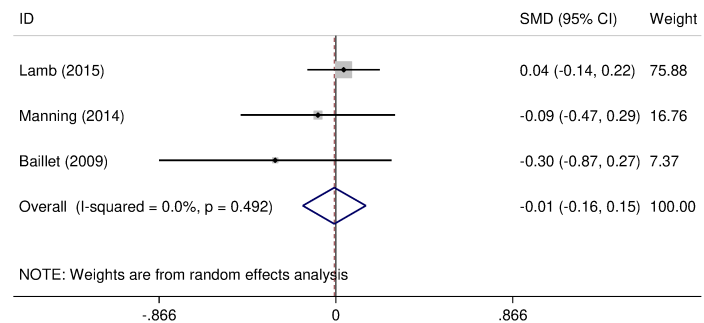

Figure – The effect of muscle strengthening exercise on quality of life (RA)

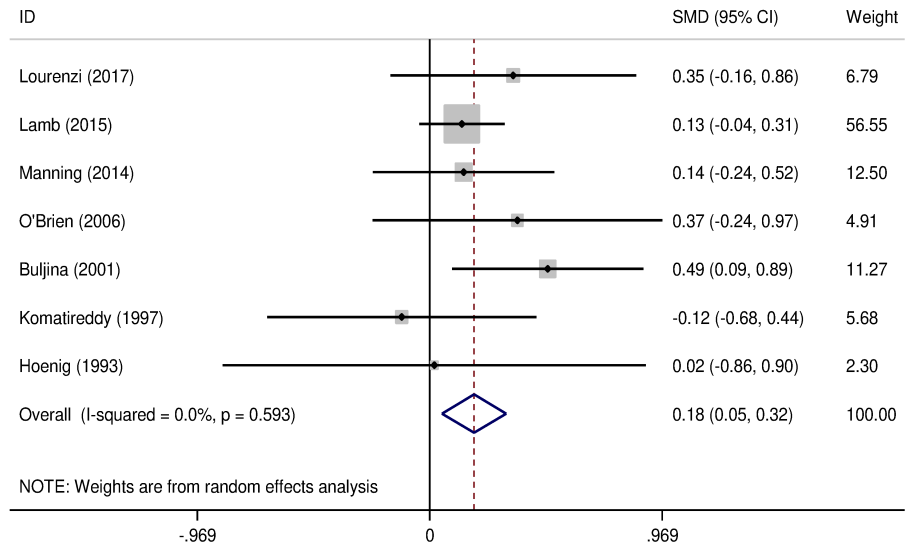

Figure – The effect of muscle strengthening exercise on grip strength (RA)

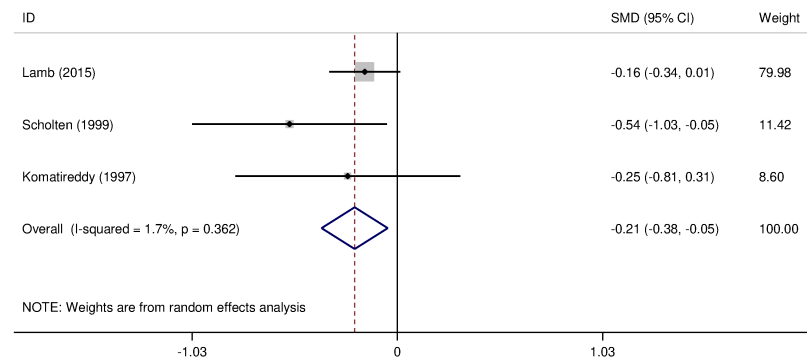

Figure – The effect of muscle strengthening exercise on depression (RA)

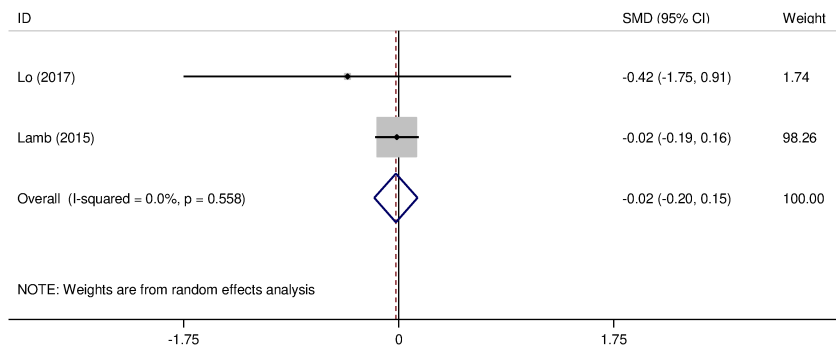

Figure – The effect of muscle strengthening exercise on CRP (RA)

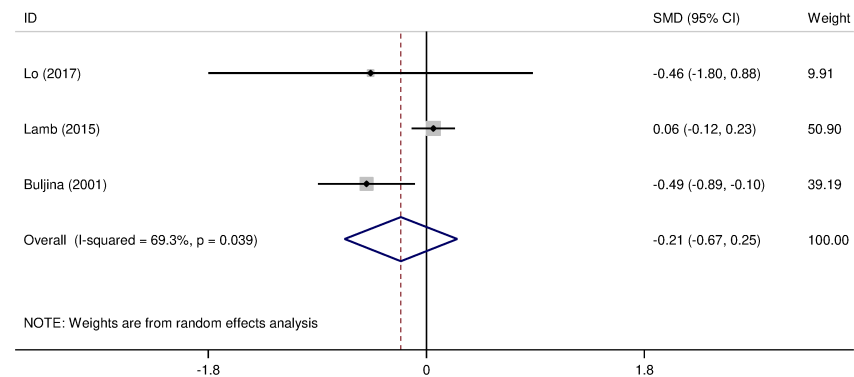

Figure – The effect of muscle strengthening exercise on ESR (RA)

## Supplementary table 45 – Description of reviews of Tai Chi in RA

Table – Tai-Chi, description of reviews

| Authors (date)              | Review type | Study type included          | Exposure detail  | Number of studies included | Funders             |
|-----------------------------|-------------|------------------------------|------------------|----------------------------|---------------------|
| Siegel (2017) <sup>69</sup> | SR          | Reviews, RCTs, observational | Aerobic exercise | 1                          | <b>Not reported</b> |

RA = rheumatoid arthritis, RCT = randomised controlled trial, SR = systematic review

## Supplementary table 46 – Description of original studies of Tai Chi in RA

Table – Tai-Chi, description of included studies

| Author (date) [country]                  | Study design      | Inclusion criteria                                                                                                                                                                                                                                                                                  | Exposure detail                                                                                                                                                                                                                                                                                    | N              | Age years, mean (SD)           | N (%) female               | Funders                                                |
|------------------------------------------|-------------------|-----------------------------------------------------------------------------------------------------------------------------------------------------------------------------------------------------------------------------------------------------------------------------------------------------|----------------------------------------------------------------------------------------------------------------------------------------------------------------------------------------------------------------------------------------------------------------------------------------------------|----------------|--------------------------------|----------------------------|--------------------------------------------------------|
| Wang (2008) [USA] <sup>153</sup>         | RCT               | RA functional class I-II, aged ≥18 years<br>Exclusions: prior experience with Tai-Chi or similar complementary therapy, cardiovascular disease or other severe disease, mini-mental state <24, pregnant or breastfeeding, non-English speaking, participated in another trial in last 30 days       | 1) 2x 60min sessions of Tai-Chi – 10 mins warm up, 30 mins Tai-Chi, 10 mins breathing, 10 mins relaxation. Also instructed to do 20 mins of Tai-Chi at home per day<br>p) Attention control – 2x 60 min sessions per week learning about RA (e.g. disease aspects, diet, therapies, mental health) | 1) 10<br>p) 10 | 1) 48 (10)<br>p) 51 (17)       | 1) 80%<br>p) 70%           | <b>Not reported</b>                                    |
| Shin (2015) [South Korea] <sup>154</sup> | NRT               | 1987 ACR RA criteria, aged >50 years, sedentary lifestyle, stable DMARDs/steroids ≥3 months<br>Exclusions: inability to bear weight on lower extremities, recent or ongoing disease flare, unstable heart condition, serious comorbidity such as terminal malignancy                                | 1) “Twelve Movement Tai-Chi for arthritis” – small to large degrees of motion, knee flexion, straight and extended head and trunk, combined rotation of head, trunk and extremities, symmetrical diagonal arm and left movements<br>p) Advice about regular, appropriate exercise                  | 1) 29<br>p) 14 | 1) 64.0 (5.4)<br>p) 62.7 (5.9) | 1) 29 (100)<br>p) 14 (100) | <b>University</b> (Hanyang University)                 |
| Lee (2012) [UK] <sup>155</sup>           | Single arm int. § | Rheumatologist diagnosis of RA, no need for walking aids indoors, 50ft walk test without shortness of breath, no pain on external ear, not currently participating in exercise program more than twice a week                                                                                       | Tai-Chi                                                                                                                                                                                                                                                                                            | 21             | 60 (13.4)                      | 7 (100)                    | <b>Charity</b> (National Research Foundation of Korea) |
| Uhlig (2010) [Norway] <sup>156</sup>     | Single arm int.   | 1987 ACR RA criteria, aged 18-70 years, stable medical treatment, no earlier experience of Tai-Chi<br>Exclusions: lack of ability to bear weight on lower extremities, recent or ongoing disease flare, unstable heart condition, participation in other physical exercise more than twice per week | “Twelve Movement Tai-Chi for arthritis” – group exercise 2x per week for 60 mins each                                                                                                                                                                                                              | 15             | Median (range)<br>57 (33, 70)  | 11 (73.3)                  | <b>Hospital</b> (Diakonhjemmet Hospital)               |

§ Study also included a Tai-Chi + auricular acupressure arm – the study reports results of these arm combined

ACR = American College of Rheumatology, DMARDs = Disease modifying anti-rheumatic drugs, N = number, NRT = non-randomised trial, RA = rheumatoid arthritis, RCT = randomised controlled trial, SD = standard deviation,

## Supplementary table 47 – Results from reviews and interventional studies of Tai Chi in RA

Table – Tai-Chi, results and quality assessment

| Outcome (outcome measure) | Study (date) [study type]                     | Standardised result, SMD (95% CI) unless otherwise stated | Natural result                                                                                                                           | AMSTAR2 quality | Rand. Seq. | Alloc. Conc. | Blind. Part. | Blind. Asses. |
|---------------------------|-----------------------------------------------|-----------------------------------------------------------|------------------------------------------------------------------------------------------------------------------------------------------|-----------------|------------|--------------|--------------|---------------|
| Pain                      | Wang (2008) [RCT] <sup>153</sup>              | <u>Tai-Chi vs control</u><br>SMD -0.32 (-1.20, 0.57)      | <u>Pain VAS, BL / 12 weeks, mean (SD)</u><br>Exercise: 3.2 (2.2) / 2.3 (2.0)<br>Control: 1.4 (1.3) / 3.0 (2.4)                           |                 | L          | L            | H/UC         | H/UC          |
|                           | Lee (2012) [Single arm int.] <sup>155</sup>   |                                                           | <u>Pain VAS, BL / 12 weeks, median</u><br>5.0 / 4.0; p=0.19                                                                              |                 |            |              |              |               |
|                           | Uhlig (2010) [Single arm int.] <sup>156</sup> |                                                           | <u>Muscle pain, BL / 12 weeks, median (range)</u><br>30 (1, 60) / 23 (2, 61); p=0.88                                                     |                 |            |              |              |               |
| Function                  | Siegel (2017) [SR] <sup>69</sup>              |                                                           | One SR <sup>157</sup> of 4 studies concluded that Tai-Chi did not produce clinically important or significant change in function         | Moderate        |            |              |              |               |
|                           | Wang (2008) [RCT] <sup>153</sup>              | <u>Tai-Chi vs control</u><br>SMD -0.25 (-1.13, 0.63)      | <u>HAQ, BL / 12 weeks, mean (SD)</u><br>Exercise: 0.9 (0.7) / 0.4 (0.4)<br>Control: 0.4 (0.3) / 0.5 (0.4)                                |                 | L          | L            | H/UC         | H/UC          |
|                           | Shin (2015) [NRT] <sup>139</sup>              | <u>Tai-Chi vs control</u><br>SMD -0.49 (-1.14, 0.16)      | <u>HAQ, change BI-3 months, mean (SD)</u><br>Exercise: -0.13 (0.29)<br>Control: 0.00 (0.20); p=0.274                                     |                 |            |              |              |               |
|                           | Uhlig (2010) [Single arm int.] <sup>156</sup> |                                                           | <u>HAQ, BL / 12 weeks, median (range)</u><br>0.5 (0.0, 1.5) / 0.5 (0.0, 1.5); p=0.34                                                     |                 |            |              |              |               |
| Disease activity          | Siegel (2017) [SR] <sup>69</sup>              |                                                           | One SR <sup>157</sup> of 4 studies concluded that Tai-Chi did not produce clinically important or significant change in disease activity | Moderate        |            |              |              |               |
|                           | Shin (2015) [NRT] <sup>154</sup>              | <u>Tai-Chi vs control</u><br>SMD -0.36 (-1.01, 0.28)      | <u>DAS28-ESR, change BI-3 months, mean (SD)</u><br>Exercise: -0.4 (1.1)<br>Control: -0.0 (1.1)                                           |                 |            |              |              |               |
|                           | Uhlig (2010) [Single arm int.] <sup>156</sup> |                                                           | <u>DAS28, BL / 12 weeks, median (range)</u><br>4.7 (2.2, 6.7) / 4.7 (0.8, 6.5); p=0.24                                                   |                 |            |              |              |               |

Alloc. Conc. = allocation concealment, AMSTAR2 = Assessing the Methodological Quality of Systematic Reviews, Blind. Asses. = Blinded assessors, Blind. Part. = blinded participants, CI = confidence interval, DAS28 = Disease Activity Score, ESR = erythrocyte sedimentation rate, H/UC = high / unclear risk of bias, HAQ = Health Assessment Questionnaire, L = low risk of bias, NRT = non-randomised trial, RA = rheumatoid arthritis, Rand. Seq. = random sequence generation, RCT = randomised controlled trial, SD = standard deviation, SMD = standardised mean difference, SR = systematic review, VAS = visual analogue scale



Table – Tai-Chi, results and quality assessment

| Outcome (outcome measure) | Study (date) [study type]                     | Standardised result, SMD (95% CI) unless otherwise stated | Natural result                                                                                                                              | AMSTAR2 quality | Rand. Seq. | Alloc. Conc. | Blind. Part. | Blind. Asses. |
|---------------------------|-----------------------------------------------|-----------------------------------------------------------|---------------------------------------------------------------------------------------------------------------------------------------------|-----------------|------------|--------------|--------------|---------------|
| Tender joints             | Siegel (2017) [SR] <sup>69</sup>              |                                                           | One SR <sup>157</sup> of 4 studies concluded that Tai-Chi did not produce clinically important or significant change in tender joint count  | Moderate        |            |              |              |               |
|                           | Wang (2008) [RCT] <sup>153</sup>              | <u>Tai-Chi vs control</u><br>SMD 0.06 (-0.82, 0.93)       | <u>Tender joint count, BL / 12 weeks, mean (SD)</u><br>Exercise: 17.0 (10.2) / 11.7 (8.1)<br>Control: 10.7 (8.6) / 11.1 (12.3)              |                 | L          | L            | H/UC         | H/UC          |
|                           | Shin (2015) [NRT] <sup>154</sup>              | <u>Tai-Chi vs control</u><br>SMD -0.64 (-1.29, 0.02)      | <u>Tender joint count (69), change BL-3 months, mean (SD)</u><br>Exercise: -2.5 (4.5)<br>Control: 0.1 (3.0); p=0.107                        |                 |            |              |              |               |
|                           | Lee (2012) [Single arm int.] <sup>155</sup>   |                                                           | <u>Tender joint count, BL / 12 weeks, median</u><br>11.0 / 5.0; p=0.002                                                                     |                 |            |              |              |               |
|                           | Uhlig (2010) [Single arm int.] <sup>156</sup> |                                                           | <u>Tender joint count, BL / 12 weeks, median (range)</u><br>8 (1, 29) / 9 (0, 20); p=0.40                                                   |                 |            |              |              |               |
| Swollen joints            | Siegel (2017) [SR] <sup>69</sup>              |                                                           | One SR <sup>157</sup> of 4 studies concluded that Tai-Chi did not produce clinically important or significant change in swollen joint count | Moderate        |            |              |              |               |
|                           | Wang (2008) [RCT] <sup>153</sup>              | <u>Tai-Chi vs control</u><br>SMD 0.38 (-0.51, 1.27)       | <u>Swollen joint count, BL / 12 weeks, mean (SD)</u><br>Exercise: 13.5 (10.6) / 12.3 (10.6)<br>Control: 6.7 (8.0) / 8.4 (9.9)               |                 | L          | L            | H/UC         | H/UC          |
|                           | Shin (2015) [NRT] <sup>154</sup>              | <u>Tai-Chi vs control</u><br>SMD -0.21 (-0.85, 0.43)      | <u>Swollen joint count (69), change BL-3 months, mean (SD)</u><br>Exercise: -0.6 (3.3)<br>Control: 0.0 (1.7); p=0.834                       |                 |            |              |              |               |
|                           | Lee (2012) [Single arm int.] <sup>155</sup>   |                                                           | <u>Swollen joint count, BL / 12 weeks, median</u><br>9.0 / 5.0; p=0.002                                                                     |                 |            |              |              |               |
|                           | Uhlig (2010) [Single arm int.] <sup>156</sup> |                                                           | <u>Swollen joint count, BL / 12 weeks, median (range)</u><br>11 (2, 20) / 5 (0, 14); p=0.02                                                 |                 |            |              |              |               |

Alloc. Conc. = allocation concealment, AMSTAR2 = Assessing the Methodological Quality of Systematic Reviews, BL = baseline, Blind. Asses. = Blinded assessors, Blind. Part. = blinded participants, CI = confidence interval, H/UC = high / unclear risk of bias, L = low risk of bias, NRT = non-randomised trial, QoL = quality of life, RA = rheumatoid arthritis, Rand. Seq. = random sequence generation, RCT = randomised controlled trial, SD = standard deviation, SMD = standardised mean difference, SR = systematic review

Table – Tai-Chi, results and quality assessment

| Outcome (outcome measure) | Study (date) [study type]                     | Standardised result, SMD (95% CI) unless otherwise stated | Natural result                                                                                                                                                                        | AMSTAR2 quality | Rand. Seq. | Alloc. Conc. | Blind. Part. | Blind. Asses. |
|---------------------------|-----------------------------------------------|-----------------------------------------------------------|---------------------------------------------------------------------------------------------------------------------------------------------------------------------------------------|-----------------|------------|--------------|--------------|---------------|
| Fatigue                   | Wang (2008) [RCT] <sup>153</sup>              | <u>Tai-Chi vs control</u><br>SMD -0.10 (-0.97, 0.78)      | <u>Fatigue VAS, BL / 12 weeks, mean (SD)</u><br>Exercise: 4.5 (2.5) / 2.9 (2.3)<br>Control: 3.6 (3.0) / 3.1 (1.9)                                                                     |                 | L          | L            | H/UC         | H/UC          |
|                           | Lee (2012) [Single arm int.] <sup>155</sup>   |                                                           | <u>Fatigue VAS, BL / 12 weeks, median</u><br>5.0 / 3.0; p=0.004                                                                                                                       |                 |            |              |              |               |
|                           | Uhlig (2010) [Single arm int.] <sup>156</sup> |                                                           | <u>Fatigue, BL / 12 weeks, median (range)</u><br>27 (5, 89) / 25 (6, 74); p=0.70                                                                                                      |                 |            |              |              |               |
| QoL                       | Wang (2008) [RCT] <sup>153</sup>              | <u>Tai-Chi vs control</u><br>SMD 0.30 (-0.59, 1.18)       | <u>EQ5D, BL / 12 weeks, mean (SD)</u><br>Exercise: 72.4 (19.2) / 78.8 (13.8)<br>Control: 84.0 (7.9) / 74.1 (17.7)                                                                     |                 | L          | L            | H/UC         | H/UC          |
| Patient global            | Siegel (2017) [SR] <sup>69</sup>              |                                                           | One SR <sup>157</sup> of 4 studies concluded that Tai-Chi did not produce clinically important or significant change in patient global assessment                                     | Moderate        |            |              |              |               |
|                           | Wang (2008) [RCT] <sup>153</sup>              | <u>Tai-Chi vs control</u><br>SMD -0.30 (-1.18, 0.59)      | <u>Patient global VAS, BL / 12 weeks, mean (SD)</u><br>Exercise: 2.9 (2.4) / 2.4 (2.6)<br>Control: 2.4 (1.9) / 3.2 (2.8)                                                              |                 | L          | L            | H/UC         | H/UC          |
|                           | Uhlig (2010) [Single arm int.] <sup>156</sup> |                                                           | <u>Patient global, BL / 12 weeks, median (range)</u><br>31 (1, 51) / 43 (6, 61); p=0.39                                                                                               |                 |            |              |              |               |
| Depression                | Wang (2008) [RCT] <sup>153</sup>              | <u>Tai-Chi vs control</u><br>SMD -0.47 (-1.36, 0.42)      | <u>CES-D, BL / 12 weeks, mean (SD)</u><br>Exercise: 16.6 (3.5) / 14.3 (1.9)<br>Control: 13.0 (3.6) / 15.8 (4.1)                                                                       |                 | L          | L            | H/UC         | H/UC          |
|                           | Lee (2012) [Single arm int.] <sup>155</sup>   |                                                           | <u>AIMS2 (affect), BL / 12 weeks, median</u><br>2.7 / 2.1; p=0.001                                                                                                                    |                 |            |              |              |               |
| Self-efficacy             | Lee (2012) [Single arm int.] <sup>155</sup>   |                                                           | <u>ASES, BL / 12 weeks, median</u><br>function: 6.4 / 7.2; p=0.106<br>other symptoms: 6.3 / 6.8; p=0.019<br>pain: 5.8 / 7.2; p=0.02                                                   |                 |            |              |              |               |
|                           | Uhlig (2010) [Single arm int.] <sup>156</sup> |                                                           | <u>Muscle pain, BL / 12 weeks, median (range)</u><br>pain: not measured / 62 (18, 86)<br>function: 89 (54, 100) / 90 (61, 100); p=0.22<br>symptoms: 75 (35, 90) / 78 (57, 97); p=0.13 |                 |            |              |              |               |

AIMS2 = Arthritis Impact Measurement Scales, Alloc. Conc. = allocation concealment, AMSTAR2 = Assessing the Methodological Quality of Systematic Reviews, ASES = Arthritis Self-efficacy scale, BL = baseline, Blind. Asses. = Blinded assessors, Blind. Part. = blinded participants, CI = confidence interval, H/UC = high / unclear risk of bias, L = low risk of bias, QoL = quality of life, RA = rheumatoid arthritis, Rand. Seq. = random sequence generation, RCT = randomised controlled trial, SD = standard deviation, SMD = standardised mean difference, SR = systematic review

Table – Tai-Chi, results and quality assessment

| Outcome (outcome measure) | Study (date) [study type]                   | Standardised result, SMD (95% CI) unless otherwise stated | Natural result                                                                                                          | AMSTAR2 quality | Rand. Seq. | Alloc. Conc. | Blind. Part. | Blind. Asses. |
|---------------------------|---------------------------------------------|-----------------------------------------------------------|-------------------------------------------------------------------------------------------------------------------------|-----------------|------------|--------------|--------------|---------------|
| CRP                       | Wang (2008) [RCT] <sup>153</sup>            | <u>Tai-Chi vs control</u><br>SMD 0.71 (-0.20, 1.62)       | <u>CRP, BL / 12 weeks, mean (SD)</u><br>Exercise: 1.4 (0.8) / 1.3 (1.3)<br>Control: 0.5 (0.4) / 0.6 (0.5)               |                 | L          | L            | H/UC         | H/UC          |
|                           | Shin (2015) [NRT] <sup>154</sup>            | <u>Tai-Chi vs control</u><br>SMD 0.14 (-0.50, 0.77)       | <u>CRP, change BI-3 months, mean (SD)</u><br>Exercise: 0.2 (0.8)<br>Control: 0.1 (0.6); p=0.399                         |                 |            |              |              |               |
| ESR                       | Wang (2008) [RCT] <sup>153</sup>            | <u>Tai-Chi vs control</u><br>SMD 0.20 (-0.68, 1.08)       | <u>ESR, BL / 12 weeks, mean (SD)</u><br>Exercise: 35.3 (28.4) / 35.1 (27.6)<br>Control: 26.8 (14.1) / 30.1 (21.3)       |                 | L          | L            | H/UC         | H/UC          |
|                           | Shin (2015) [NRT] <sup>154</sup>            | <u>Tai-Chi vs control</u><br>SMD 0.19 (-0.45, 0.83)       | <u>ESR, change BI-3 months, mean (SD)</u><br>Exercise: 2.0 (18.0)<br>Control: -1.1 (12.4); p=0.569                      |                 |            |              |              |               |
| Grip strength             | Wang (2008) [RCT] <sup>153</sup>            | <u>Tai-Chi vs control</u><br>SMD -0.51 (-1.40, 0.39)      | <u>Grip strength, BL / 12 weeks, mean (SD)</u><br>Exercise: 16.7 (9.3) / 17.7 (9.9)<br>Control: 23.3 (9.3) / 22.5 (9.0) |                 | L          | L            | H/UC         | H/UC          |
|                           | Lee (2012) [Single arm int.] <sup>155</sup> |                                                           | <u>Grip strength, BL / 12 weeks, median</u><br>Right hand: 20.0 / 40.0; p=0.001<br>Left hand: 28.0 / 34.0; p=0.001      |                 |            |              |              |               |
| Walk-test                 | Wang (2008) [RCT] <sup>153</sup>            | <u>Tai-Chi vs control</u><br>SMD -0.08 (-0.96, 0.80)      | <u>50ft walk, BL / 12 weeks, mean (SD)</u><br>Exercise: 10.9 (3.2) / 9.6 (3.1)<br>Control: 11.3 (2.5) / 9.8 (1.6)       |                 | L          | L            | H/UC         | H/UC          |
|                           | Lee (2012) [Single arm int.] <sup>155</sup> |                                                           | <u>50ft Walk-test, BL / 12 weeks, median</u><br>16.2 / 13.5; p=0.001                                                    |                 |            |              |              |               |

Alloc. Conc. = allocation concealment, AMSTAR2 = Assessing the Methodological Quality of Systematic Reviews, BL = baseline, Blind. Asses. = Blinded assessors, Blind. Part. = blinded participants, CI = confidence interval, CRP = C-reactive protein, ESR = erythrocyte sedimentation rate, H/UC = high / unclear risk of bias, L = low risk of bias, NRT = non-randomised trial, RA = rheumatoid arthritis, Rand. Seq. = random sequence generation, RCT = randomised controlled trial, SD = standard deviation, SMD = standardised mean difference

*Table – Tai-Chi (RA), SF36 results at final follow-up, mean (SD)*

| Author (date)                           | PCS        | MCS        | GH          | PF          | RP          | RE          | SF           | BP           | V           | MH          |
|-----------------------------------------|------------|------------|-------------|-------------|-------------|-------------|--------------|--------------|-------------|-------------|
| Wang (2008) [Tai-Chi] <sup>153</sup>    | 42.8 (8.2) | 56.9 (5.4) | 68.3 (18.3) | 75.0 (16.3) | 67.5 (39.2) | 100.0 (0.0) | 85.0 (16.5)  | 63.4 (16.5)  | 64.0 (15.4) | 82.0 (14.9) |
| Wang (2008) [Control] <sup>153</sup>    | 43.2 (9.5) | 54.2 (9.2) | 69.0 (17.0) | 76.3 (17.5) | 55.0 (38.7) | 86.7 (23.3) | 82.5 (17.9)  | 66.1 (20.1)  | 62.0 (16.5) | 79.6 (16.2) |
| Uhlig (2010) [Tai-Chi] <sup>156</sup> § |            |            | 47 (35, 97) | 75 (25, 95) | 25 (0, 100) | 67 (0, 100) | 62 (12, 100) | 42 (22, 100) | 50 (25, 70) | 76 (56, 92) |

§ Results presented as median (range)

BL = baseline, BP = bodily pain, FU = follow-up, GH = general health, IQR = interquartile range, MCS = mental component score, MH = mental health, PCS = physical component score, PF = physical function, RE = role emotional, RP = role physical, SD = standard deviation, SF = social functioning, V = vitality

## Supplementary table 48 – Description of reviews of studies of yoga in RA

Table – Yoga (RA), description of reviews

| Authors (date)              | Review type | Study type included | Exposure detail | Number of studies included | Funders                                                          |
|-----------------------------|-------------|---------------------|-----------------|----------------------------|------------------------------------------------------------------|
| Wang (2018) <sup>64</sup>   | MA          | RCTs                | Yoga            | 13                         | <b>Government</b> (National Natural Science Foundation of China) |
| Cramer (2013) <sup>66</sup> | SR          | RCTs                | Yoga            | 2                          | <b>Charity</b> (the Rut- and Klaus-Bahlsen-Foundation)           |

MA = meta-analysis, RA = rheumatoid arthritis, RCT = randomised controlled trial, SR = systematic review

## Supplementary table 49 – Description of original studies of yoga in RA

Table –Yoga (RA), description of included studies

| Author (date) [country]                  | Study design | Inclusion criteria                                                                                                                                                                                                                                                                                                                                                                                                                                                                                  | Exposure detail                                                                                                                                                          | N              | Age years, mean (SD)             | N (%) female               | Funders                                                                                     |
|------------------------------------------|--------------|-----------------------------------------------------------------------------------------------------------------------------------------------------------------------------------------------------------------------------------------------------------------------------------------------------------------------------------------------------------------------------------------------------------------------------------------------------------------------------------------------------|--------------------------------------------------------------------------------------------------------------------------------------------------------------------------|----------------|----------------------------------|----------------------------|---------------------------------------------------------------------------------------------|
| Ward (2018) [New Zealand] <sup>158</sup> | RCT          | 2010 ACR/EULAR RA criteria, ≥18 years, pain in previous month ≥3 out of 10, average self-reported sleep disturbance over previous month greater than 30 min per night, ability to self-mobilize up and down from chair<br>Exclusion: current regular yoga practice (>1 per week, major surgery within past 6 months, planned surgery in following 6 months, intra-articular steroid injections within previous 4 weeks, serious co-morbidities, inability to commit to 13 week study                | 1) 8 week program of group and home yoga – group practice consisted of once-weekly 75 min yoga classes; home practice based on 20-min guided relaxation<br>p) Usual care | 1) 13<br>p) 13 | 1) 50 (12)<br>p) 59 (8)          | 1) 13 (100)<br>p) 12 (92)  | <b>Charity</b> (Arthritis New Zealand)                                                      |
| Evans (2013) [USA] <sup>159</sup>        | RCT          | 1987 ACR RA criteria, symptom duration >6 months, aged 16-35 years, using DMARDs or low dose steroids, communicate in English<br>Exclusions: pregnant, recently experienced injury, history of drug / alcohol abuse, taking experimental medication in last 6 months                                                                                                                                                                                                                                | 1) Iyengar yoga – 2 classes per week for 6 weeks<br>p) Waitlist control                                                                                                  | 1) 11<br>p) 15 | 1) 29.9 (2.9)<br>p) 27.1 (4.2)   | 1) 11 (100)<br>p) 15 (100) | <b>Government</b> (NIAMS, NCCAM)                                                            |
| Singh (2011) [India] <sup>160</sup>      | RCT          | Exclusion: not interested in yoga                                                                                                                                                                                                                                                                                                                                                                                                                                                                   | 1) Half-hour per day, 6 days per week for 7 weeks<br>p) Waitlist control                                                                                                 | 1) 40<br>p) 40 | 1) 35.1 (7.3)<br>p) 34.7 (7.3)   | 56 (70)                    | <b>Not reported</b>                                                                         |
| Badsha (2009) [UAE] <sup>161</sup>       | NRT          | 1987 ACR RA criteria, aged >18 years, no physical disability                                                                                                                                                                                                                                                                                                                                                                                                                                        | 1) 12 sessions of yoga, 1 hour each<br>p) Waitlist control                                                                                                               | 1) 26<br>p) 21 | 1) 44.0 (10.0)<br>p) 46.2 (10.7) | Not reported               | <b>Charity</b> (Emirates Arthritis Foundation),<br><b>Industry</b> (Abbott Pharmaceuticals) |
| Bosch (2009) [USA] <sup>162</sup>        | NRT          | 1987 ACR RA criteria, Post-menopause, aged 45-75 years, active RA, interested in doing yoga, functional class I-III, stable DMARDs for 4 weeks<br>Exclusions: any other major inflammatory disease, diabetes, systemic disease (e.g. COPD, congestive heart failure, stroke, chronic liver failure, renal disease), joint replacement in last 2 months, smokers, drug/alcohol abuse history, narcotic analgesic use (except for limited used <3 times a day of hydrocodone, codeine or propoxyphene | 1) Hartha yoga, 3x per week – 75 mins<br>p) Patients who couldn't currently do yoga due to time constraints used as controls                                             | 1) 9<br>p) 7   | 1) 56.3 (7.6)<br>p) 66.7 (5.8)   | 1) 9 (100)<br>p) 7 (100)   | <b>Not reported</b>                                                                         |

ACR = American College of Rheumatology, COPD = chronic obstructive pulmonary disease, DMARDs = disease modifying anti-rheumatic drugs, EULAR = European League Against Rheumatism, N = number, NCCAM = National Center for Complementary and Alternative Medicine, NIAMS = National Institute of Arthritis and Musculoskeletal and Skin Diseases, NRT = non-randomised trial, RA = rheumatoid arthritis, RCT = randomised controlled trial, SD = standard deviation, UAE = United Arab Emirates, USA = United States of America

## Supplementary table 50 – Results from reviews and interventional studies of yoga in RA

Table – Yoga (RA), results and quality assessment

| Outcome (outcome measure) | Study (date) [study type]                          | Standardised result, SMD (95% CI) unless otherwise stated                                                                                                | Natural result                                                                                                                 | AMSTAR2 quality | Rand. Seq. | Alloc. Conc. | Blind. Part. | Blind. Asses. |
|---------------------------|----------------------------------------------------|----------------------------------------------------------------------------------------------------------------------------------------------------------|--------------------------------------------------------------------------------------------------------------------------------|-----------------|------------|--------------|--------------|---------------|
| Pain                      | Wang (2018) [MA] <sup>64</sup>                     | <u>Yoga vs control</u><br>SMD -0.98 (-1.18, -0.78) †                                                                                                     |                                                                                                                                | Moderate        |            |              |              |               |
|                           | Cramer (2013) [SR] <sup>66</sup>                   |                                                                                                                                                          | Two RCTs, both at high risk of bias. The evidence for the effect of yoga on pain was graded as very low.                       | Moderate        |            |              |              |               |
|                           | Ward (2018) [RCT] <sup>158</sup>                   | <u>Yoga vs control</u><br>SMD 0.00 (-0.77, 0.77)                                                                                                         | <u>Pain VAS, BL / 9 weeks, mean (SD)</u><br>Yoga: 34 (18) / 33 (21)<br>Control: 31 (28) / 33 (32)                              |                 | L          | L            | H/UC         | L             |
|                           | Evans (2013) [RCT] <sup>159</sup>                  | <u>Yoga vs control</u><br>SMD -0.12 (-0.90, 0.66)                                                                                                        | <u>Pain disability index, BL / 6 weeks, mean (SD)</u><br>Yoga: 26.5 (19.3) / 13.5 (14.5)<br>Control: 18.7 (18.7) / 15.4 (17.3) |                 | H/UC       | H/UC         | H/UC         | L             |
|                           | Singh (2011) [RCT] <sup>160</sup>                  | <u>Yoga vs control</u><br>SMD -2.65 (-3.25, -2.04)                                                                                                       | <u>Pain, BL / 7 weeks, mean (SD)</u><br>Yoga: 1.90 (0.84) / 0.20 (0.516)<br>Control: 2.03 (0.7) / 1.92 (0.76)                  |                 | H/UC       | H/UC         | H/UC         | H/UC          |
|                           | Bespoke meta-analysis including <sup>158-160</sup> | <u>Yoga vs control</u><br>SMD -0.94 (-2.75, 0.88), I <sup>2</sup> 94.9%<br>Excluding outlier <sup>160</sup> : SMD -0.06 (-0.61, 0.49), I <sup>2</sup> 0% |                                                                                                                                |                 |            |              |              |               |
| Function                  | Wang (2018) [MA] <sup>64</sup>                     | <u>Yoga vs control</u><br>SMD -0.55 (-0.83, -0.26)                                                                                                       |                                                                                                                                | Moderate        |            |              |              |               |
|                           | Ward (2018) [RCT] <sup>158</sup>                   | <u>Yoga vs control</u><br>SMD -0.81 (-1.61, -0.01)                                                                                                       | <u>HAQ, BL / 9 weeks, mean (SD)</u><br>Yoga: 0.51 (0.61) / 0.35 (0.35)<br>Control: 0.68 (0.63) / 0.83 (0.76)                   |                 | L          | L            | H/UC         | L             |
|                           | Evans (2013) [RCT] <sup>159</sup>                  | <u>Yoga vs control</u><br>SMD 0.29 (-0.50, 1.07)                                                                                                         | <u>HAQ, BL / 6 weeks, mean (SD)</u><br>Yoga: 1.2 (0.8) / 0.9 (0.7)<br>Control: 0.9 (0.8) / 0.7 (0.7)                           |                 | H/UC       | H/UC         | H/UC         | L             |
|                           | Bespoke meta-analysis including <sup>158;159</sup> | <u>Yoga vs control</u><br>SMD -0.26 (-1.33, 0.82), I <sup>2</sup> 72.8%                                                                                  |                                                                                                                                |                 |            |              |              |               |
|                           | Badsha (2009) [NRT] <sup>161</sup>                 |                                                                                                                                                          | <u>HAQ, BL / 8 weeks, mean</u><br>Yoga: 0.8 / 0.49<br>Control: 0.78 / 0.75                                                     |                 |            |              |              |               |
|                           | Bosch (2009) [NRT] <sup>162</sup>                  |                                                                                                                                                          | <u>HAQ, BL / 10 weeks, mean (SD ‡)</u><br>Yoga: 1.10 (0.54) / 0.72 (0.54)<br>Control: 0.65 (0.48) / 0.77 (0.48)                |                 |            |              |              |               |

† Meta-analysis included RA and osteoarthritis patients, ‡ SD calculated from standard error

Alloc. Conc. = allocation concealment, AMSTAR2 = Assessing the Methodological Quality of Systematic Reviews, BL = baseline, Blind. Asses. = Blinded assessors, Blind. Part. = blinded participants, CI = confidence interval, H/UC = high / unclear risk of bias, HAQ = Health Assessment Questionnaire, L = low risk of bias, MA = meta-analysis, NRT = non-randomised trial, RA = rheumatoid arthritis, Rand. Seq. = random sequence generation, RCT = randomised controlled trial, SD = standard deviation, SMD = standardised mean difference, SR = systematic review, VAS = visual analogue scale

Table – Yoga (RA), results and quality assessment

| Outcome (outcome measure) | Study (date) [study type]                          | Standardised result, SMD (95% CI) unless otherwise stated               | Natural result                                                                                                                                           | AMSTAR2 quality | Rand. Seq. | Alloc. Conc. | Blind. Part. | Blind. Asses. |
|---------------------------|----------------------------------------------------|-------------------------------------------------------------------------|----------------------------------------------------------------------------------------------------------------------------------------------------------|-----------------|------------|--------------|--------------|---------------|
| Disease activity          | Ward (2018) [RCT] <sup>158</sup>                   | <u>Yoga vs control</u><br>SMD 0.26 (-0.52, 1.03)                        | <u>CDAI, BL / 9 weeks, mean (SD)</u><br>Yoga: 14.2 (6.2) / 11.5 (7.3)<br>Control: 14.5 (8.0) / 9.6 (7.6)                                                 |                 | L          | L            | H/UC         | L             |
|                           | Evans (2013) [RCT] <sup>159</sup>                  | <u>Yoga vs control</u><br>SMD 0.00 (-0.78, 0.78)                        | <u>DAS28, BL / 6 weeks, mean (SD)</u><br>Yoga: 4.6 (1.7) / 3.3 (1.2)<br>Control: 4.4 (2.1) / 3.3 (1.6)                                                   |                 | H/UC       | H/UC         | H/UC         | L             |
|                           | Bespoke meta-analysis including <sup>158;159</sup> | <u>Yoga vs control</u><br>SMD 0.13 (-0.42, 0.68), I <sup>2</sup> 0%     |                                                                                                                                                          |                 |            |              |              |               |
|                           | Badsha (2009) [NRT] <sup>161</sup>                 |                                                                         | <u>DAS28, BL / 8 weeks, mean</u><br>Yoga: 3.9 / 3.3<br>Control: 3.8 / 3.9                                                                                |                 |            |              |              |               |
| Tender joints             | Badsha (2009) [NRT] <sup>161</sup>                 |                                                                         | <u>Tender joint count, BL / 8 weeks, mean</u><br>Yoga: 3.5 / 2.11<br>Control: 5 / 5.3                                                                    |                 |            |              |              |               |
| Swollen joints            | Singh (2011) [RCT] <sup>160</sup>                  | <u>Yoga vs control</u><br>SMD -1.65 (-2.15, -1.14)                      | <u>Swollen joint count, BL / 7 weeks, mean (SD)</u><br>Yoga: 3.38 (1.31) / 0.43 (0.64)<br>Control: 3.25 (1.24) / 2.38 (1.55)                             |                 | H/UC       | H/UC         | H/UC         | H/UC          |
|                           | Badsha (2009) [NRT] <sup>161</sup>                 |                                                                         | <u>Swollen joint count, BL / 8 weeks, mean</u><br>Yoga: 3.2 / 1<br>Control: 3.9 / 3.8                                                                    |                 |            |              |              |               |
| Morning stiffness         | Singh (2011) [RCT] <sup>160</sup>                  | <u>Yoga vs control</u><br>SMD -2.11 (-2.66, -1.56)                      | <u>Morning stiffness (mins), BL / 7 weeks, mean (SD)</u><br>Yoga: 76.25 (20.56) / 13.15 (17.18)<br>Control: 81.68 (21.65) / 55.88 (22.90)                |                 | H/UC       | H/UC         | H/UC         | H/UC          |
| Fatigue                   | Ward (2018) [RCT] <sup>158</sup>                   | <u>Yoga vs control</u><br>SMD 0.29 (-0.48, 1.06)                        | <u>BRAF-MDQ, BL / 9 weeks, mean (SD §)</u><br>Yoga: 5.7 (3.3) / 4.3 (4.2)<br>Control: 5.0 (5.0) / 3.3 (2.5)                                              |                 | L          | L            | H/UC         | L             |
|                           | Evans (2013) [RCT] <sup>159</sup>                  | <u>Yoga vs control</u><br>SMD 1.05 (0.22, 1.89)                         | <u>FACIT-F, BL / 6 weeks, mean (SD)</u><br>Yoga: 32.3 (11.1) / 40.2 (6.4)<br>Control: 29.1 (15.0) / 29.7 (11.9)<br>[Higher scores indicate less fatigue] |                 | H/UC       | H/UC         | H/UC         | L             |
|                           | Bespoke meta-analysis including <sup>158;159</sup> | <u>Yoga vs control</u><br>SMD -0.37 (-1.69, 0.94), I <sup>2</sup> 81.3% |                                                                                                                                                          |                 |            |              |              |               |
|                           | Badsha (2009) [NRT] <sup>161</sup>                 |                                                                         | <u>Fatigue VAS, BL / 8 weeks, mean</u><br>Yoga: 34 / 26<br>Control: 32 / 44                                                                              |                 |            |              |              |               |

§ Mean (SD) estimated from median (IQR) using published formula<sup>87</sup>

Alloc. Conc. = allocation concealment, AMSTAR2 = Assessing the Methodological Quality of Systematic Reviews, BL = baseline, Blind. Asses. = Blinded assessors, Blind. Part. = blinded participants, BRAF-MDQ = Bristol Rheumatoid Arthritis Fatigue - Multidimensional Questionnaire, CDAI = Clinical Disease Activity Index, CI = confidence interval, DAS28 = Disease Activity Score 28, FACIT-F = Functional Assessment Chronic Illness Therapy – Fatigue, H/UC = high / unclear risk of bias, L = low risk of bias, RA = rheumatoid arthritis, Rand. Seq. = random sequence generation, RCT = randomised controlled trial, SD = standard deviation, SMD = standardised mean difference, VAS = visual analogue scale



Table – Yoga (RA), results and quality assessment

| Outcome (outcome measure) | Study (date) [study type]                          | Standardised result, SMD (95% CI) unless otherwise stated               | Natural result                                                                                                                             | AMSTAR2 quality | Rand. Seq. | Alloc. Conc. | Blind. Part. | Blind. Asses. |
|---------------------------|----------------------------------------------------|-------------------------------------------------------------------------|--------------------------------------------------------------------------------------------------------------------------------------------|-----------------|------------|--------------|--------------|---------------|
| Quality of life           | Ward (2018) [RCT] <sup>158</sup>                   | <u>Yoga vs control</u><br>SMD 0.14 (-0.63, 0.91)                        | <u>EQ5D, BL / 9 weeks, mean (SD)</u><br>Yoga: 0.77 (0.17) / 0.76 (0.14)<br>Control: 0.77 (0.24) / 0.73 (0.26)                              |                 | L          | L            | H/UC         | L             |
| Patient global            | Wang (2018) [MA] <sup>64</sup>                     | <u>Yoga vs control, SF36 general health</u><br>SMD 0.80 (0.59, 1.01) †  |                                                                                                                                            | Moderate        |            |              |              |               |
|                           | Evans (2013) [RCT] <sup>159</sup>                  | <u>Yoga vs control</u><br>SMD -0.67 (-1.47, 0.13)                       | <u>Brief Symptom Inventory – global severity, BL / 6 weeks, mean (SD)</u><br>Yoga: 9.0 (5.2) / 5.3 (2.9)<br>Control: 7.5 (6.7) / 9.5 (7.8) |                 | H/UC       | H/UC         | H/UC         | L             |
|                           | Badsha (2009) [NRT] <sup>161</sup>                 |                                                                         | <u>Patient global assessment, BL / 8 weeks, mean</u><br>Yoga: 32 / 25<br>Control: 26 / 40                                                  |                 |            |              |              |               |
| Mental-health             | Wang (2018) [MA] <sup>64</sup>                     | <u>Yoga vs control, SF36 mental health</u><br>SMD 0.49 (0.15, 0.82)     |                                                                                                                                            | Moderate        |            |              |              |               |
| Anxiety                   | Ward (2018) [RCT] <sup>158</sup>                   | <u>Yoga vs control</u><br>SMD -0.06 (-0.83, 0.71)                       | <u>HADS - anxiety, BL / 9 weeks, mean (SD)</u><br>Yoga: 6.5 (2.8) / 4.7 (3.8)<br>Control: 4.9 (3.0) / 4.9 (2.7)                            |                 | L          | L            | H/UC         | L             |
|                           | Evans (2013) [RCT] <sup>159</sup>                  | <u>Yoga vs control</u><br>SMD -0.30 (-1.08, 0.49)                       | <u>Brief Symptom Inventory - anxiety, BL / 6 weeks, mean (SD)</u><br>Yoga: 3.0 (1.9) / 2.2 (1.6)<br>Control: 2.2 (2.3) / 2.9 (2.8)         |                 | H/UC       | H/UC         | H/UC         | L             |
|                           | Bespoke meta-analysis including <sup>158;159</sup> | <u>Yoga vs control</u><br>SMD -0.18 (-0.72, -0.37), I <sup>2</sup> 0%   |                                                                                                                                            |                 |            |              |              |               |
| Depression                | Ward (2018) [RCT] <sup>158</sup>                   | <u>Yoga vs control</u><br>SMD -0.04 (-0.81, 0.73)                       | <u>HADS - depression, BL / 9 weeks, mean (SD)</u><br>Yoga: 3.4 (2.3) / 3.0 (1.9)<br>Control: 2.9 (2.6) / 3.1 (2.7)                         |                 | L          | L            | H/UC         | L             |
|                           | Evans (2013) [RCT] <sup>159</sup>                  | <u>Yoga vs control</u><br>SMD -0.85 (-1.66, -0.04)                      | <u>Brief Symptom Inventory - depression, BL / 6 weeks, mean (SD)</u><br>Yoga: 1.8 (1.8) / 1.0 (1.1)<br>Control: 2.1 (2.8) / 3.1 (3.1)      |                 | H/UC       | H/UC         | H/UC         | L             |
|                           | Bespoke meta-analysis including <sup>158;159</sup> | <u>Yoga vs control</u><br>SMD -0.43 (-1.22, 0.36), I <sup>2</sup> 49.8% |                                                                                                                                            |                 |            |              |              |               |

Alloc. Conc. = allocation concealment, AMSTAR2 = Assessing the Methodological Quality of Systematic Reviews, BL = baseline, Blind. Asses. = Blinded assessors, Blind. Part. = blinded participants, CI = confidence interval, H/UC = high / unclear risk of bias, HADS = Hospital Anxiety and Depression Scale, L = low risk of bias, MA = meta-analysis, NRT = non-randomised trial, RA = rheumatoid arthritis, Rand. Seq. = random sequence generation, RCT = randomised controlled trial, SD = standard deviation, SMD = standardised mean difference, SR = systematic review

Table – Yoga (RA), results and quality assessment

| Outcome (outcome measure) | Study (date) [study type]          | Standardised result, SMD (95% CI) unless otherwise stated                                   | Natural result                                                                                                                                                                                                              | AMSTAR2 quality | Rand. Seq. | Alloc. Conc. | Blind. Part. | Blind. Asses. |
|---------------------------|------------------------------------|---------------------------------------------------------------------------------------------|-----------------------------------------------------------------------------------------------------------------------------------------------------------------------------------------------------------------------------|-----------------|------------|--------------|--------------|---------------|
| Self-efficacy             | Evans (2013) [RCT] <sup>159</sup>  | <u>Yoga vs control</u><br>Function: SMD -0.08 (-0.86, 0.70)<br>Pain: SMD 0.50 (-0.29, 1.29) | <u>ASES, BL / 6 weeks, mean (SD)</u><br><i>Function</i><br>Yoga: 6.20 (3.0) / 7.97 (2.22)<br>Control: 7.90 (2.25) / 8.16 (2.36)<br><i>Pain</i><br>Yoga: 12.96 (4.84) / 15.68 (2.90)<br>Control: 13.31 (4.07) / 13.84 (4.11) |                 | H/UC       | H/UC         | H/UC         | L             |
| CRP                       | Singh (2011) [RCT] <sup>160</sup>  | <u>Yoga vs control</u><br>SMD -0.03 (-0.47, 0.41)                                           | <u>CRP, BL / 7 weeks, mean (SD)</u><br>Yoga: 7.09 (0.95) / 6.43 (1.65)<br>Control: 6.59 (1.17) / 6.47 (1.04)                                                                                                                |                 | H/UC       | H/UC         | H/UC         | H/UC          |
| ESR                       | Badsha (2009) [NRT] <sup>161</sup> |                                                                                             | <u>ESR, BL / 8 weeks, mean</u><br>Yoga: 31 / 27<br>Control: 24.9 / 25.7                                                                                                                                                     |                 |            |              |              |               |

Alloc. Conc. = allocation concealment, AMSTAR2 = Assessing the Methodological Quality of Systematic Reviews, ASES = Arthritis Self-efficacy Scale, BL = baseline, Blind. Asses. = Blinded assessors, Blind. Part. = blinded participants, CI = confidence interval, CRP = C-reactive protein, ESR = erythrocyte sedimentation rate, H/UC = high / unclear risk of bias, L = low risk of bias, NRT = non-randomised trial, RA = rheumatoid arthritis, Rand. Seq. = random sequence generation, RCT = randomised controlled trial, SD = standard deviation, SMD = standardised mean difference, SR = systematic review

## Supplementary table 51 – Description of reviews of studies of aerobic exercise in SLE

Table – Aerobic exercises (SLE), description of reviews

| Authors (date)                        | Review type | Study type included | Exposure detail  | Number of studies included | Funders                                                         |
|---------------------------------------|-------------|---------------------|------------------|----------------------------|-----------------------------------------------------------------|
| O'Dwyer (2017) <sup>163</sup>         | MA          | RCTs, quasi-RCTs    | Aerobic exercise | 7                          | <b>Not reported</b>                                             |
| Wu (2017) <sup>164</sup>              | MA          | RCTs                | Aerobic exercise | 3                          | <b>Not reported</b>                                             |
| Andrades (2017) <sup>165</sup>        | SR          | NRT                 | Aerobic exercise | 1                          | <b>No funding</b>                                               |
| del Pino-Sedeno (2016) <sup>166</sup> | SR          | RCTs                | Aerobic exercise | 4                          | <b>Government</b> (Institute of Health)                         |
| Yuen (2014) <sup>167</sup>            | SR          | RCTs                | Aerobic exercise | 7                          | <b>Not reported – authors declared no conflicts of interest</b> |

MA = meta-analysis, NRT = non-randomised trial, RCT = randomised controlled trial, SLE = systemic lupus erythematosus, SR = systematic review

## Supplementary table 52 – Description of original studies of aerobic exercise in SLE

Table – Aerobic exercises (SLE), description of included studies

| Author (date) [country]                         | Study design | Inclusion criteria                                                                                                                                                                                                                                                                                                                                                                                                                                                         | Exposure detail                                                                                                                                                                                                                                                                                                                                                                                         | N                         | Age years, mean (SD)                               | N (%) female                                | Funders                                                                                                                                                       |
|-------------------------------------------------|--------------|----------------------------------------------------------------------------------------------------------------------------------------------------------------------------------------------------------------------------------------------------------------------------------------------------------------------------------------------------------------------------------------------------------------------------------------------------------------------------|---------------------------------------------------------------------------------------------------------------------------------------------------------------------------------------------------------------------------------------------------------------------------------------------------------------------------------------------------------------------------------------------------------|---------------------------|----------------------------------------------------|---------------------------------------------|---------------------------------------------------------------------------------------------------------------------------------------------------------------|
| Abraham (2016) [Brazil] <sup>168</sup>          | RCT          | ACR SLE criteria, aged ≥18 years<br>Exclusions: absolute of relative contraindications to physical exercise according to the American College of Sports Medicine guidelines, not available for two consecutive sessions, participation in regular physical activity in past 6 months                                                                                                                                                                                       | 1) Cardiovascular training – walking and exercise bike<br>2) Muscle strengthening training – free weights and elastic band exercises<br>p) Control                                                                                                                                                                                                                                                      | 1) 21<br>2) 21<br>p) 21   | 1) 46.1 (14.1)<br>2) 43.8 (14.6)<br>p) 39.1 (14.4) | 61 (96.8)                                   | <b>Not reported</b>                                                                                                                                           |
| Bostrom (2016) [Sweden] <sup>169</sup>          | RCT          | 1982 ACR criteria, haemoglobin value ≥100 g/L, s-creatinine ≤300 µmol/l, diastolic blood pressure ≤100 mm Hg at rest, stable prednisolone dose ≤15 mg/day, the ability to follow instructions and to perform a maximal bicycle ergometer exercise test<br>Exclusions: cerebrovascular disease, arthroplastic complication / surgery or pregnancy                                                                                                                           | 1) First three months = education, supervised aerobic exercise, individual coaching, loan and use of heart monitor. Months four-nine = individual coaching, heart rate monitor, physical activity diary. Months nine-12 = heart rate monitor and diary<br>p) Asked not to change physical activity lifestyle during study.                                                                              | 1) 12<br>p) 13            | 1) 52 (10)<br>p) 53 (9)                            | 1) 12 (100)<br>p) 13 (100)                  | <b>Charity</b> (Swedish Rheumatism Association, the Vardal Foundation), <b>University</b> (Karolinska Institutet)                                             |
| Tench (2003) [UK] <sup>170</sup>                | RCT          | 1997 ACR criteria, aged 18-55 years, stable medication for ≥2 months<br>Exclusions: active severe myositis, nephritis, neurological involvement or cardiac or pulmonary disease, pregnant, exercise >1 week                                                                                                                                                                                                                                                                | 1) Asked to exercise at home for ≥3x per week – main exercise was walking but patients were encouraged to take up other forms of exercise (e.g. cycling, swimming). Also seen every 2 weeks for supervised exercise session<br>p1) Relaxation group – listened to relaxing audiotape 3x per week in darkened, warm, quiet room<br>p2) No intervention – asked to continue normal daily activity pattern | 1) 33<br>p1) 29<br>p2) 32 | 39 (7.8 †)                                         | 1) 33 (100)<br>p1) 29 (100)<br>p2) 32 (100) | <b>Charity</b> (Arthritis Research Campaign), <b>Hospital</b> (St Bartholomew's Hospital), <b>Professional body</b> (British Medical Association)             |
| Robb-Nicholson (1989) [USA] <sup>171</sup>      | RCT          | Exclusions: Serum creatinine ≥265 µmol/l, haematocrit ≤30%, previous myocardial infarction, previous cerebrovascular accident, severe cognitive impairment, resting diastolic blood pressure ≥100 mmHg, severe arthritis of ≥3 weight-bearing joints, using beta-blockers                                                                                                                                                                                                  | 1) Exercise at home for 30 mins per day to attain 60-80% of max heart rate<br>p) Non aerobic stretching for 30 mins 3x per week                                                                                                                                                                                                                                                                         | 1) 10<br>p) 10            | 1) 40.9 (9.8)<br>p) 38.3 (10.9)                    | 1) 10 (100)<br>p) 10 (100)                  | <b>Government</b> (NIH, NHLBI), <b>Charity</b> (Lupus Foundation of America), <b>Industry</b> (J. R. Reynolds Corporation Grant)                              |
| Soriano-Maldonado (2018) [Spain] <sup>172</sup> | NRT          | 1997 SLE criteria, treatment stability for ≥6 months, not performing exercise<br>Exclusions: biological treatment in previous 6 months or need of prednisone dose >10 mg/day, background cardiovascular disease in previous year, contraindications for exercise, other rheumatic conditions, pregnancy, active acute or chronic infections, neoplasms, acute renal failure, cardiac or pulmonary involvement, BMI >35, not being able to read, understand or sign consent | 1) 75 min session 2x per week – aerobic exercise on a treadmill<br>p) Usual care – verbal information about healthy lifestyle                                                                                                                                                                                                                                                                           | 1) 26<br>p) 32            | 1) 43.0 (15.1)<br>p) 44.8 (13.1)                   | 1) 26 (100)<br>p) 32 (100)                  | <b>Charity</b> (Fundación para la Investigación Biosanitaria de Andalucía Oriental), <b>Professional body</b> (Ilustre Colegio Oficial de Médicos de Granada) |

† SD calculated for standard error in paper; ACR = American College of Rheumatology, N = number, NHLBI = National Heart, Lung, and Blood Institute, NIH = National Institutes of Health, NRT = non-randomised trial, RCT = randomised controlled trial, SD = standard deviation, SLE = systemic lupus erythematosus, UK = United Kingdom, USA = United States of America

Table – Aerobic exercises (SLE), description of included studies

| Author (date) [country]                      | Study design | Inclusion criteria                                                                                                                                                                                                                                                                                                                                                                                                                                                                                                                                                                                                                                                                                                                                            | Exposure detail                                                                                                                                 | N              | Age years, mean (SD)            | N (%) female               | Funders                                                                                                        |
|----------------------------------------------|--------------|---------------------------------------------------------------------------------------------------------------------------------------------------------------------------------------------------------------------------------------------------------------------------------------------------------------------------------------------------------------------------------------------------------------------------------------------------------------------------------------------------------------------------------------------------------------------------------------------------------------------------------------------------------------------------------------------------------------------------------------------------------------|-------------------------------------------------------------------------------------------------------------------------------------------------|----------------|---------------------------------|----------------------------|----------------------------------------------------------------------------------------------------------------|
| dos Reis-Neto (2013) [Brazil] <sup>173</sup> | NRT          | 1997 SLE criteria, aged 18-45 years<br>Exclusions: haemoglobin <10 mg/dl, neuropsychiatric, pulmonary, articular or vascular damage that would not allow the practice of exercise; coronary disease; heart failure (functional class 5II); pulmonary hypertension; uncontrolled hypertension; creatinine $\geq$ 1.4 mg/dl; BMI $\geq$ 35 kg/m <sup>2</sup> ; diabetes mellitus; uncontrolled hypothyroidism; smoking in the last 12 months; pregnancy; menopause; use of statins or regular practice of exercise in the past 3 months and overlap with other autoimmune rheumatic diseases, except anti-phospholipid syndrome.                                                                                                                                | 1) Exercise protocol, 3x per week for 60 mins (10 min warm up, 40 min walking, 10 min cool down<br>p) Non-exercise control                      | 1) 18<br>p) 20 | 1) 35.3 (6.8)<br>p) 30.8 (7.2)  | 1) 18 (100)<br>p) 20 (100) | <b>Government</b> (Sao Paulo State Research Foundation)                                                        |
| Carvalho (2005) [Brazil] <sup>174</sup>      | NRT          | 1982 ACR criteria, aged 18-55 years<br>Exclusions: Haemoglobin values <10gm/dl, neurological disease or cardiovascular accident sequels, psychosis, depression, under psychiatric care, respiratory disease (pulmonary hypertension, pulmonary fibrosis, bronchitis, asthma, emphysema), heart insufficiency, functional class III, history of myocardial infarction/ischemic heart disease, diastolic blood pressure >100mmhg, active nephritis with creatinine levels >3.0 mg/dl, SLEDAI >8, thyroid dysfunction, diabetes, hip/knee prosthesis or aseptic bone necrosis, deep venous thrombosis in lower limbs, severe arthritis in $\geq$ 3 weight bearing joints, pregnancy, regular physical activity $\geq$ 3x per week, concomitant rheumatic disease | 1) Supervised training program 3x per week – 10 minutes warm-up, 40 minutes walking, 10 minutes cool down<br>p) Did not participate in training | 1) 41<br>p) 19 | 1) 36.2 (10.8)<br>p) 35.2 (9.1) | 1) 41 (100)<br>p) 19 (100) | <b>Government</b> (Sao Paulo Research Foundation, Coordenação de Aperfeiçoamento de Pessoal de Nível Superior) |

ACR = American College of Rheumatology, N = number, NRT = non-randomised trial, SD = standard deviation, SLE = systemic lupus erythematosus

## Supplementary table 53 – Results from reviews and interventional studies of aerobic exercise in SLE

Table – Aerobic exercise (SLE), results and quality assessment

| Outcome (outcome measure) | Study (date) [study type]                          | Standardised result, SMD (95% CI) unless otherwise stated                                                                                     | Natural result                                                                                                                                             | AMSTAR2 quality | Rand. Seq. | Alloc. Conc. | Blind. Part. | Blind. Asses. |
|---------------------------|----------------------------------------------------|-----------------------------------------------------------------------------------------------------------------------------------------------|------------------------------------------------------------------------------------------------------------------------------------------------------------|-----------------|------------|--------------|--------------|---------------|
| Pain                      | Carvalho (2005) [NRT] <sup>174</sup>               | <u>Exercise vs control at 12 weeks</u><br>SMD -0.45 (-1.00, 0.11)                                                                             | <u>Pain VAS, BL / 12 weeks, mean (SD)</u><br>Exercise: 2.02 (2.73) / 1.70 (2.69)<br>Control: 2.47 (2.71) / 3.01 (3.44)                                     |                 |            |              |              |               |
| Function                  | Carvalho (2005) [NRT] <sup>174</sup>               | <u>Exercise vs control at 12 weeks</u><br>SMD -0.49 (-1.04, 0.06)                                                                             | <u>HAQ, BL / 12 weeks, mean (SD)</u><br>Exercise: 0.14 (0.21) / 0.06 (0.19)<br>Control: 0.23 (0.27) / 0.38 (1.14)                                          |                 |            |              |              |               |
| Disease activity          | O'Dwyer (2017) [MA] <sup>163</sup>                 |                                                                                                                                               | <u>Disease activity</u><br>MD = 0.01 (-0.54, 0.56)                                                                                                         | Moderate        |            |              |              |               |
|                           | Abrahamo (2016) [RCT] <sup>168</sup>               | <u>Aerobic exercise vs control</u><br>SMD 0.57 (-0.04, 1.19)                                                                                  | <u>SLEDAI, BL / 12 weeks, mean (SD)</u><br>Aerobic: 1.8 (0.6) / 1.6 (0.9)<br>Muscle strengthening: 1.4 (0.6) / 1.3 (0.5)<br>Control: 2.3 (1.7) / 1.2 (0.4) |                 | L          | L            | H/UC         | L             |
|                           | Bostrom (2016) [RCT] <sup>169</sup>                | <u>Exercise vs control at 12 months</u><br>SMD 0.44 (-0.35, 1.24)                                                                             | <u>SLEDAI, BL / 12 months, mean (SD †)</u><br>Exercise: 3.0 (6.7) / 4.0 (3.4)<br>Control: 1.7 (2.5) / 2.3 (4.2)                                            |                 | L          | L            | H/UC         | L             |
|                           | Tench (2003) [RCT] <sup>170</sup>                  | <u>Exercise vs control at 12 weeks</u><br>Exercise vs relaxation: SMD 0.00 (-0.50, 0.50)<br>Exercise vs control: SMD -0.22 (-0.71, 0.27)      | <u>SLAM, BL / 12 weeks, mean (SD †)</u><br>Exercise: 5.3 (3.9) / 5.0 (3.9)<br>Relaxation: 5.7 (3.9) / 5.0 (3.1)<br>Control: 5.7 (3.1) / 5.7 (2.3)          |                 | L          | H/UC         | H/UC         | H/UC          |
|                           | Bespoke meta-analysis including <sup>168-170</sup> | <u>Exercise vs control</u><br>SMD 0.22 (-0.32, 0.76), I <sup>2</sup> 55.7%<br>[Exercise vs control comparison used for Tench <sup>170</sup> ] |                                                                                                                                                            |                 |            |              |              |               |
|                           | dos Reis-Neto (2013) [NRT] <sup>173</sup>          | <u>Exercise vs control at 16 weeks</u><br>SMD -0.17 (-0.81, 0.47)                                                                             | <u>SLEDAI, BL / 16 weeks, mean (SD)</u><br>Exercise: 2.0 (2.1) / 2.4 (2.3)<br>Control: 2.4 (2.3) / 3.1 (5.3)                                               |                 |            |              |              |               |

† mean (SD) estimated from median (interquartile range) using published formula<sup>87</sup>

Alloc. Conc. = allocation concealment, AMSTAR2 = Assessing the Methodological Quality of Systematic Reviews, BL = baseline, Blind. Asses. = Blinded assessors, Blind. Part. = blinded participants, CI = confidence interval, H/UC = high / unclear risk of bias, HAQ = Health Assessment Questionnaire, L = low risk of bias, NRT = non-randomised trial, Rand. Seq. = random sequence generation, RCT = randomised controlled trial, SD = standard deviation, SLAM = systemic lupus activity measure, SLE = systemic lupus erythematosus, SLEDAI = Systemic Lupus Erythematosus Disease Activity Index, SMD = standardised mean difference, VAS = visual analogue scale

Table – Aerobic exercise (SLE), results and quality assessment

| Outcome (outcome measure)                          | Study (date) [study type]                                                                                                                                                                              | Standardised result, SMD (95% CI) unless otherwise stated                                                                                                                                                                                                                                                                                                                                                                               | Natural result                                                                                                                                                                                                                                                                                                                                                                                                                                                                            | AMSTAR2 quality | Rand. Seq. | Alloc. Conc. | Blind. Part. | Blind. Asses. |
|----------------------------------------------------|--------------------------------------------------------------------------------------------------------------------------------------------------------------------------------------------------------|-----------------------------------------------------------------------------------------------------------------------------------------------------------------------------------------------------------------------------------------------------------------------------------------------------------------------------------------------------------------------------------------------------------------------------------------|-------------------------------------------------------------------------------------------------------------------------------------------------------------------------------------------------------------------------------------------------------------------------------------------------------------------------------------------------------------------------------------------------------------------------------------------------------------------------------------------|-----------------|------------|--------------|--------------|---------------|
| Fatigue                                            | O'Dwyer (2017) [MA] <sup>163</sup>                                                                                                                                                                     |                                                                                                                                                                                                                                                                                                                                                                                                                                         | <u>Fatigue</u><br>MD -0.61 (-1.19, -0.02))                                                                                                                                                                                                                                                                                                                                                                                                                                                | Moderate        |            |              |              |               |
|                                                    | Wu (2017) [MA] <sup>164</sup>                                                                                                                                                                          |                                                                                                                                                                                                                                                                                                                                                                                                                                         | <u>Fatigue Severity Scale, mean difference</u><br>MD -0.52 (-0.92, -0.13)                                                                                                                                                                                                                                                                                                                                                                                                                 | Moderate        |            |              |              |               |
|                                                    | del Pino-Sedeno (2016) [SR] <sup>166</sup>                                                                                                                                                             |                                                                                                                                                                                                                                                                                                                                                                                                                                         | 4/4 studies reported significant improvements in fatigue compared to non-exercise controls                                                                                                                                                                                                                                                                                                                                                                                                | Moderate        |            |              |              |               |
|                                                    | Yuen (2014) [SR] <sup>167</sup>                                                                                                                                                                        |                                                                                                                                                                                                                                                                                                                                                                                                                                         | 4/7 studies reported reductions in fatigue following exercise                                                                                                                                                                                                                                                                                                                                                                                                                             | Moderate        |            |              |              |               |
|                                                    | Tench (2003) [RCT] <sup>170</sup>                                                                                                                                                                      | <u>Exercise vs control at 12 weeks</u><br><u>Chalder Fatigue Scale</u><br>Exercise vs relaxation: SMD -0.33 (-0.83, 0.17)<br>Exercise vs control: SMD -0.68 (-1.18, -0.18)<br><u>Fatigue VAS</u><br>Exercise vs relaxation: SMD 0.06 (-0.44, 0.55)<br>Exercise vs control: SMD -0.53 (-1.03, -0.04)<br><u>Fatigue Severity scale</u><br>Exercise vs relaxation: SMD -0.35 (-0.85, 0.16)<br>Exercise vs control: SMD -0.35 (-0.84, 0.14) | <u>Chalder fatigue scale, BL / 12 weeks, mean (SD ‡)</u><br>Exercise: 22 (7.5) / 15 (8.6)<br>Relaxation: 24 (8.6) / 18 (9.7)<br>Control: 24 (9.6) / 21 (9.1)<br><u>Fatigue VAS, BL / 12 weeks, mean (SD ‡)</u><br>Exercise: 300 (57) / 239 (86)<br>Relaxation: 290 (59) / 234 (97)<br>Control: 286 (68) / 283 (79)<br><u>Fatigue Severity Scale, BL / 12 weeks, mean (SD ‡)</u><br>Exercise: 5.4 (1.1) / 4.8 (1.7)<br>Relaxation: 5.4 (1.1) / 5.3 (1.1)<br>Control: 5.5 (1.1) / 5.4 (1.7) |                 | L          | H/UC         | H/UC         | H/UC          |
|                                                    | Robb-Nicholson (1989) [RCT] <sup>171</sup>                                                                                                                                                             | <u>Exercise vs control, change BL-8 weeks</u><br>Stamina: SMD 1.63 (0.60, 2.65)<br>Comparative energy: SMD 1.00 (0.06, 1.93)<br>Sufficient energy: SMD 1.44 (0.44, 2.43)<br>Tiredness: SMD 0.86 (-0.06, 1.78)                                                                                                                                                                                                                           | <u>Fatigue VAS, change BL-8 weeks, mean (SD)</u><br><u>Q1 – Stamina</u><br>Exercise: 1.9 (1.7)<br>Control: -1.3 (2.2)<br><u>Q2 – Comparative energy</u><br>Exercise: 1.1 (1.9)<br>Control: -1.0 (2.3)<br><u>Q3 – Sufficient energy</u><br>Exercise: 1.7 (2.2)<br>Control: -0.9 (1.3)<br><u>Q4 – Tiredness</u><br>Exercise: 1.7 (2.5)<br>Control: -0.2 (1.9)                                                                                                                               |                 |            | H/UC         | H/UC         | H/UC          |
| Bespoke meta-analysis including <sup>170,171</sup> | <u>Exercise vs control</u><br>SMD -0.72 (-1.16, -0.28), I <sup>2</sup> 0%<br>[Exercise vs control comparison used for Tench <sup>170</sup> ;<br>Tiredness VAS used for Robb-Nicholson <sup>171</sup> ] |                                                                                                                                                                                                                                                                                                                                                                                                                                         |                                                                                                                                                                                                                                                                                                                                                                                                                                                                                           |                 |            |              |              |               |

‡ SD calculated for standard error in paper

Alloc. Conc. = allocation concealment, AMSTAR2 = Assessing the Methodological Quality of Systematic Reviews, BL = baseline, Blind. Asses. = Blinded assessors, Blind. Part. = blinded participants, CI = confidence interval, H/UC = high / unclear risk of bias, L = low risk of bias, Rand. Seq. = random sequence generation, RCT = randomised controlled trial, SD = standard deviation, SLE = systemic lupus erythematosus, SMD = standardised mean difference

Table – Aerobic exercise (SLE), results and quality assessment

| Outcome (outcome measure)   | Study (date) [study type]                          | Standardised result, SMD (95% CI) unless otherwise stated                                                                                   | Natural result                                                                                                                                                     | AMSTAR2 quality | Rand. Seq. | Alloc. Conc. | Blind. Part. | Blind. Asses. |
|-----------------------------|----------------------------------------------------|---------------------------------------------------------------------------------------------------------------------------------------------|--------------------------------------------------------------------------------------------------------------------------------------------------------------------|-----------------|------------|--------------|--------------|---------------|
| Fatigue                     | Carvalho (2005) [NRT] <sup>174</sup>               | <u>Exercise vs control at 12 weeks</u><br>SMD -0.44 (-0.99, 0.11)                                                                           | <u>Fatigue scale (0-7), BL / 12 weeks, mean (SD)</u><br>Exercise: 3.57 (1.47) / 2.68 (1.33)<br>Control: 3.28 (1.33) / 3.29 (1.47)                                  |                 |            |              |              |               |
| Quality of life             | O'Dwyer (2017) [MA] <sup>163</sup>                 |                                                                                                                                             | 2/4 studies reported that QoL improved – the 2 studies that did not report improvements were RCTs, the two that did were NRTs                                      | Moderate        |            |              |              |               |
| Anxiety                     | Tench (2003) [RCT] <sup>170</sup>                  | <u>Exercise vs control at 12 weeks</u><br>Exercise vs relaxation: SMD -0.22 (-0.72, 0.28)<br>Exercise vs control: SMD -0.18 (-0.66, 0.31)   | <u>HADS - anxiety, BL / 12 weeks, mean (SD ‡)</u><br>Exercise: 9.0 (4.6) / 7.4 (4.6)<br>Relaxation: 9.9 (4.8) / 8.5 (5.4)<br>Control: 8.8 (4.0) / 8.2 (4.5)        |                 | L          | H/UC         | H/UC         | H/UC          |
| Depression                  | O'Dwyer (2017) [MA] <sup>163</sup>                 | <u>Exercise vs control</u><br>SMD -0.40 (-0.71, -0.09)                                                                                      |                                                                                                                                                                    | Moderate        |            |              |              |               |
|                             | Abrahamo (2016) [RCT] <sup>168</sup>               | <u>Aerobic exercise vs control</u><br>SMD 0.00 (-0.61, 0.61)                                                                                | <u>BDI, BL / 12 weeks, mean (SD)</u><br>Aerobic: 20.6 (5.3) / 20.1 (7.1)<br>Muscle strengthening: 19.4 (5.0) / 17.3 (4.4)<br>Control: 19.1 (5.6) / 20.1 (5.9)      |                 | L          | L            | H/UC         | L             |
|                             | Tench (2003) [RCT] <sup>170</sup>                  | <u>Exercise vs control at 12 weeks</u><br>Exercise vs relaxation: SMD -0.52 (-1.03, -0.02)<br>Exercise vs control: SMD -0.30 (-0.79, 0.19)  | <u>HADS - depression, BL / 12 weeks, mean (SD ‡)</u><br>Exercise: 5.8 (4.0) / 4.6 (4.0)<br>Relaxation: 7.9 (4.3) / 6.9 (4.8)<br>Control: 6.4 (3.4) / 5.7 (3.4)     |                 | L          | H/UC         | H/UC         | H/UC          |
|                             | Bespoke meta-analysis including <sup>168;170</sup> | <u>Exercise vs control</u><br>SMD -0.18 (-0.56, 0.20), I <sup>2</sup> 0%<br>[Exercise vs control comparison used for Tench <sup>170</sup> ] |                                                                                                                                                                    |                 |            |              |              |               |
|                             | Carvalho (2005) [NRT] <sup>174</sup>               | <u>Exercise vs control at 12 weeks</u><br>SMD -0.70 (-1.26, -0.14)                                                                          | <u>BDI, BL / 12 weeks, mean (SD)</u><br>Exercise: 8.37 (12.79) / 2.90 (3.00)<br>Control: 5.79 (6.44) / 6.63 (8.50)                                                 |                 |            |              |              |               |
| CRP                         | Soriano-Maldonado (2018) [NRT] <sup>172</sup>      |                                                                                                                                             | <u>CRP, change BL-12 weeks, median (SE)</u><br>Exercise : 0.17 (0.59)<br>Control: -0.24 (0.55)<br><u>Mean difference in change (95% CI)</u><br>0.411 (-1.25, 2.07) |                 |            |              |              |               |
| Cardiovascular risk factors | Andrades (2017) [SR] <sup>165</sup>                |                                                                                                                                             | Concluded that the effect of physical activity on cardiovascular risk factors has been poorly studied                                                              | Moderate        |            |              |              |               |

‡ SD calculated for standard error in paper

Alloc. Conc. = allocation concealment, AMSTAR2 = Assessing the Methodological Quality of Systematic Reviews, BDI = Beck Depression Inventory, BL = baseline, Blind. Asses. = Blinded assessors, Blind. Part. = blinded participants, CI = confidence interval, CRP = C-reactive protein, H/UC = high / unclear risk of bias, HADS = Hospital Anxiety and Depression Scale, L = low risk of bias, NRT = non-randomised trial, Rand. Seq. = random sequence generation, RCT = randomised controlled trial, SD = standard deviation, SE = standard error, SLE = systemic lupus erythematosus, SLEDAI = Systemic Lupus Erythematosus Disease Activity Index, SMD = standardised mean difference



Table – Aerobic exercise (SLE), SF36 results at final follow-up, mean (SD)

| Author (date)                              | PCS | MCS | GH            | PF            | RP              | RE            | SF            | BP            | V             | MH            |
|--------------------------------------------|-----|-----|---------------|---------------|-----------------|---------------|---------------|---------------|---------------|---------------|
| Abrahamo (2016) [Exercise] <sup>168</sup>  |     |     | 49.3 (22.2)   | 55.5 (28.4)   | 49.8 (34.8)     | 51.6 (25.9)   | 48.3 (22.1)   | 41.7 (28.4)   | 63.5 (21.2)   | 44.3 (19.4)   |
| Abrahamo (2016) [Control] <sup>168</sup>   |     |     | 39.2 (23.2)   | 41.4 (15.7)   | 29.7 (17.4)     | 22.9 (11.0)   | 35.2 (27.9)   | 24.6 (14.4)   | 26.6 (14.3)   | 33.7 (18.9)   |
| Bostrom (2016) [Exercise] <sup>169</sup> † |     |     | 34.8 (18.4)   | 75.0 (21.0)   | 20.8 (41.9)     | 55.6 (83.9)   | 64.6 (21.0)   | 38 (9.2)      | 34.2 (33.5)   | 64.0 (13.4)   |
| Bostrom (2016) [Control] <sup>169</sup> †  |     |     | 51.0 (37.0)   | 66.7 (20.8)   | 54.2 (83.1)     | 66.7 (69.2)   | 75.0 (36.4)   | 64.3 (19.1)   | 50.8 (27.0)   | 76.7 (15.0)   |
| Tench (2003) [Exercise] <sup>170</sup>     |     |     |               | 69 (29)       | 50 (77) †       |               |               |               | 46 (29)       |               |
| Tench (2003) [Relaxation] <sup>170</sup>   |     |     |               | 57 (32)       | 50 (78) †       |               |               |               | 41 (27)       |               |
| Tench (2003) [Control] <sup>170</sup>      |     |     |               | 60 (28)       | 29 (49) †       |               |               |               | 35 (28)       |               |
| Carvalho (2005) [Exercise] <sup>174</sup>  |     |     | 73.17 (18.97) | 91.10 (11.37) | 85.24 (27.32) § | 79.66 (31.58) | 88.56 (15.28) | 74.32 (20.59) | 76.22 (14.61) | 77.85 (16.45) |
| Carvalho (2005) [Control] <sup>174</sup>   |     |     | 62.37 (26.08) | 86.84 (11.21) | 60.53 (43.55) § | 80.74 (30.08) | 81.74 (19.58) | 67.89 (21.98) | 66.05 (20.04) | 72.63 (19.6)  |

† mean (SD) estimated from median (interquartile range) using published formula<sup>87</sup>

§ labelled “physical fitness” in paper

BP = bodily pain, FU = follow-up, GH = general health, MCS = mental component score, MH = mental health, PCS = physical component score, PF = physical function, RE = role emotional, RP = role physical, SD = standard deviation, SF = social functioning, SLE = systemic lupus erythematosus, V = vitality

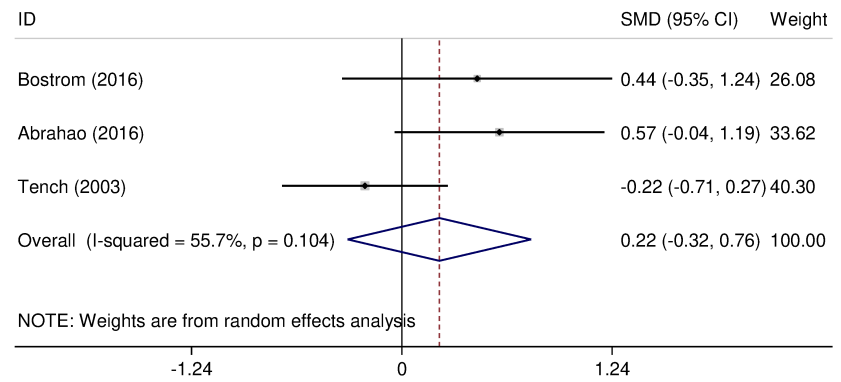

Figure – The effect of aerobic exercise on disease activity (SLE)

## Supplementary table 54 – Description of reviews of studies of aerobic + muscle strengthening exercise in SLE

Table – Aerobic + muscle strengthening exercises (SLE), description of reviews

| Authors (date)                        | Review type | Study type included | Exposure detail                          | Number of studies included | Funders                                 |
|---------------------------------------|-------------|---------------------|------------------------------------------|----------------------------|-----------------------------------------|
| O'Dwyer (2017) <sup>163</sup>         | MA          | RCTs, quasi-RCTs    | Aerobic vs muscle strengthening exercise | 3                          | <b>Not reported</b>                     |
| del Pino-Sedeno (2016) <sup>166</sup> | SR          | RCTs                | Aerobic + muscle strengthening exercise  | 1                          | <b>Government</b> (Institute of Health) |

MA = meta-analysis, RCT = randomised controlled trial, SLE = systemic lupus erythematosus, SR = systematic review

## Supplementary table 55 – Description of original studies of aerobic + muscle strengthening exercise in SLE

Table – Aerobic + muscle strengthening exercises (SLE), description of included studies

| Author (date) [country]                    | Study design | Inclusion criteria                                                                                                                                                                                                                                                                                                                                                                                                                                                     | Exposure detail                                                                                                                                    | N                       | Age years, mean (SD)                                       | N (%) female               | Funders                                                                                                                                                                                                 |
|--------------------------------------------|--------------|------------------------------------------------------------------------------------------------------------------------------------------------------------------------------------------------------------------------------------------------------------------------------------------------------------------------------------------------------------------------------------------------------------------------------------------------------------------------|----------------------------------------------------------------------------------------------------------------------------------------------------|-------------------------|------------------------------------------------------------|----------------------------|---------------------------------------------------------------------------------------------------------------------------------------------------------------------------------------------------------|
| Abraham (2016) [Brazil] <sup>168</sup>     | RCT          | ACR SLE criteria, aged ≥18 years<br>Exclusions: absolute of relative contraindications to physical exercise according to the American College of Sports Medicine guidelines, not available for two consecutive sessions, participation in regular physical activity in past 6 months                                                                                                                                                                                   | 1) Cardiovascular training – walking and exercise bike<br>2) Muscle strengthening training – free weights and elastic band exercises<br>p) Control | 1) 21<br>2) 21<br>p) 21 | 1) 46.1 (14.1)<br>2) 43.8 (14.6)<br>p) 39.1 (14.4)         | 61 (96.8)                  | <b>Not reported</b>                                                                                                                                                                                     |
| Bogdanovic (2015) [Serbia] <sup>175</sup>  | RCT          | 1982 ACR SLE criteria, SLEDAI ≤5, no immunosuppressive therapy                                                                                                                                                                                                                                                                                                                                                                                                         | 1) Aerobic training on exercise bike<br>2) Isotonic muscle strengthening exercises                                                                 | 1) 30<br>2) 30          | 1) 38.8 (12.6)<br>2) 47.9 (11.5)                           | 1) 30 (100)<br>2) 30 (100) | <b>Government</b> (Ministry of Science)                                                                                                                                                                 |
| Miozzi (2012) [Brazil] <sup>176</sup>      | RCT          | Physically inactive for ≥6 months, women, ACR SLE criteria, aged 20-40 years, SLEDAI ≤4<br>Exclusions: cardiovascular dysfunction, rhythm and conduction disorders, musculoskeletal disturbances, kidney and pulmonary involvement, peripheral neuropathy, use of tobacco, treatment with lipid lowering drugs, fibromyalgia, use of chronotropic or anti-hypertensive drugs                                                                                           | 1) Supervised exercise training program – 35-40 mins of muscle strengthening training, 30 mins treadmill, 5 mins stretching<br>p) Usual care       | 1) 14<br>p) 10          | 1) 31.4 (5.9)<br>p) 31.0 (4.8)                             | 1) 14 (100)<br>p) 10 (100) | <b>Industry</b> (Bank of America Merrill Lynch), <b>Government</b> (São Paulo Research Foundation, Conselho Nacional de Desenvolvimento Científico e Tecnológico), <b>Charity</b> (Federico Foundation) |
| Ramsey-Goldman (2000) [USA] <sup>177</sup> | RCT          | ACR SLE criteria<br>Exclusions: significant functional impairment due to heart disease, neurological diseases, chronic pulmonary disease, cognitive impairment that prevented following exercise directions, or conditions preventing exercise (e.g. avascular necrosis), symptomatic anaemia (haemoglobin <8g/dl), advanced renal insufficiency (creatinine >4mg/dl or creatinine clearance <10 ml/min), or thrombocytopenia (platelet count <50000/mm <sup>3</sup> ) | 1) Aerobic – patients instructed to exercise to 70-80% max heart rate.<br>2) Muscle strengthening – muscle strengthening and stretching            | 1) 5<br>2) 5            | Mean (range)<br>1) 33.9 (24.2-49.9)<br>2) 43.2 (19.1-64.2) | 1) 5 (100)<br>2) 5 (100)   | <b>University</b> (Northwestern University), <b>Government</b> (NIH), <b>Charity</b> (Lupus Foundation of America, Arthritis Foundation)                                                                |

ACR = American College of Rheumatology, N = number, NIH = National Institutes of Health, RCT = randomised controlled trial, SD = standard deviation, SLE = systemic lupus erythematosus, SLEDAI = systemic lupus erythematosus disease activity index, USA = United States of America

Table – Aerobic + muscle strengthening exercises (SLE), description of included studies

| Author (date) [country]                | Study design | Inclusion criteria | Exposure detail                                                                                                                                                                   | N            | Age years, mean (SD)                                              | N (%) female             | Funders                                                                                                                                                                                                                                         |
|----------------------------------------|--------------|--------------------|-----------------------------------------------------------------------------------------------------------------------------------------------------------------------------------|--------------|-------------------------------------------------------------------|--------------------------|-------------------------------------------------------------------------------------------------------------------------------------------------------------------------------------------------------------------------------------------------|
| Timoteo (2018) [Brazil] <sup>178</sup> | NRT          | ACR SLE criteria   | 1) 4 months, 3x per week, individual with physiotherapist, muscle strengthening exercise with barbell and plates, bike training added in after 1 month<br>p) Non-exercise control | 1) 5<br>p) 9 | median (IQR)<br>1) 38.0<br>(30.0, 41.5<br>p) 45.0<br>(31.5, 52.0) | 1) 5 (100)<br>p) 9 (100) | <b>Government</b><br>(Financiadora de Estudos e Projetos, Fundacao de Amparo a Pesquisa do Estado de Minas Gerais, Conselho Nacional de Desenvolvimento Cientifico e Tecnologico), <b>Charity</b><br>(Fundacao de Ensino e Pesquisa de Uberaba) |

ACR = American College of Rheumatology, N = number, NRT = non-randomised trial, SD = standard deviation, SLE = systemic lupus erythematosus

## Supplementary table 56 – Results from reviews and interventional studies of aerobic + muscle strengthening exercise in SLE

Table – Aerobic + muscle strengthening exercises (SLE), results and quality assessment

| Outcome (outcome measure) | Study (date) [study type]                          | Standardised result, SMD (95% CI) unless otherwise stated                                                                                | Natural result                                                                                                                                             | AMSTAR2 quality | Rand. Seq. | Alloc. Conc. | Blind. Part. | Blind. Asses. |
|---------------------------|----------------------------------------------------|------------------------------------------------------------------------------------------------------------------------------------------|------------------------------------------------------------------------------------------------------------------------------------------------------------|-----------------|------------|--------------|--------------|---------------|
| Disease activity          | O'Dwyer (2017) [MA] <sup>163</sup>                 |                                                                                                                                          | Compared aerobic vs muscle strengthening – no difference in disease activity scores                                                                        | Moderate        |            |              |              |               |
|                           | Abrahamo (2016) [RCT] <sup>168</sup>               | <u>Aerobic exercise vs muscle strengthening exercise at 12 weeks</u><br>SMD 0.41 (-0.20, 1.02)                                           | <u>SLEDAI, BL / 12 weeks, mean (SD)</u><br>Aerobic: 1.8 (0.6) / 1.6 (0.9)<br>Muscle strengthening: 1.4 (0.6) / 1.3 (0.5)<br>Control: 2.3 (1.7) / 1.2 (0.4) |                 | L          | L            | H/UC         | L             |
|                           | Miossi (2012) [RCT] <sup>176</sup>                 | <u>Exercise vs control at 12 weeks</u><br>SMD -0.42 (-1.24, 0.40)                                                                        | <u>SLEDAI, BL / 12 weeks, mean (SD)</u><br>Exercise: 0.9 (1.5) / 0.8 (1.2)<br>Control: 1.0 (1.3) / 1.3 (1.2)                                               |                 | H/UC       | H/UC         | H/UC         | H/UC          |
|                           | Ramsey-Goldman (2000) [RCT] <sup>177</sup>         | <u>Aerobic exercise vs muscle strengthening exercise, change BL-7 months</u><br>SMD 0.91 (-0.41, 2.22)                                   | <u>SLAM, change BL – 7 months, mean (SD †)</u><br>Aerobic exercise: 2.80 (2.17)<br>Muscle strengthening exercise: 0.40 (3.05)                              |                 | H/UC       | H/UC         | H/UC         | H/UC          |
|                           | Bespoke meta-analysis including <sup>168;177</sup> | <u>Aerobic vs muscle strengthening exercise</u><br>SMD 0.63 (0.08, 1.19), I <sup>2</sup> 0% [in favour of muscle strengthening exercise] |                                                                                                                                                            |                 |            |              |              |               |
| Fatigue                   | O'Dwyer (2017) [MA] <sup>163</sup>                 |                                                                                                                                          | Compared aerobic vs muscle strengthening – vitality scores on the SF36 higher in aerobic groups                                                            | Moderate        |            |              |              |               |
|                           | del Pino-Sedeno (2016) [SR] <sup>166</sup>         |                                                                                                                                          | One study reported significant improvement in fatigue compared to controls                                                                                 | Moderate        |            |              |              |               |
|                           | Bogdanovic (2015) [RCT] <sup>175</sup>             | <u>Aerobic exercise vs muscle strengthening exercise at 6 weeks</u><br>SMD 0.00 (-0.51, 0.51)                                            | <u>Fatigue Severity Scale, BL / 6 weeks, mean (SD)</u><br>Aerobic: 53.6 (6.3) / 29.2 (7.9)<br>Muscle strengthening: 53.6 (6.3) / 29.2 (7.9) [sic]          |                 | H/UC       | H/UC         | H/UC         | H/UC          |
|                           | Ramsey-Goldman (2000) [RCT] <sup>177</sup>         | <u>Aerobic exercise vs muscle strengthening exercise, change BL-7 months</u><br>SMD -0.05 (-1.29, 1.19)                                  | <u>Fatigue Severity Scale, change BL – 7 months, mean (SD †)</u><br>Aerobic exercise: -0.71 (0.60)<br>Muscle strengthening exercise: -0.68 (0.62)          |                 | H/UC       | H/UC         | H/UC         | H/UC          |
|                           | Bespoke meta-analysis including <sup>175;177</sup> | <u>Aerobic vs muscle strengthening exercise</u><br>SMD -0.01 (-0.48, 0.46), I <sup>2</sup> 0%                                            |                                                                                                                                                            |                 |            |              |              |               |

† SD calculated from 95% CI

Alloc. Conc. = allocation concealment, AMSTAR2 = Assessing the Methodological Quality of Systematic Reviews, BL = baseline, Blind. Asses. = Blinded assessors, Blind. Part. = blinded participants, CI = confidence interval, H/UC = high / unclear risk of bias, L = low risk of bias, Rand. Seq. = random sequence generation, RCT = randomised controlled trial, SD = standard deviation, SLE = systemic lupus erythematosus, SLEDAI = systemic lupus erythematosus disease activity index, SMD = standardised mean difference

Table – Aerobic + muscle strengthening exercises (SLE), results and quality assessment

| Outcome (outcome measure) | Study (date) [study type]              | Standardised result, SMD (95% CI) unless otherwise stated                               | Natural result                                                                                                                                                                                                                                                                    | AMSTAR2 quality | Rand. Seq. | Alloc. Conc. | Blind. Part. | Blind. Asses. |
|---------------------------|----------------------------------------|-----------------------------------------------------------------------------------------|-----------------------------------------------------------------------------------------------------------------------------------------------------------------------------------------------------------------------------------------------------------------------------------|-----------------|------------|--------------|--------------|---------------|
| Depression                | O'Dwyer (2017) [MA] <sup>163</sup>     |                                                                                         | Compared aerobic vs muscle strengthening – no difference in depression scores                                                                                                                                                                                                     | Moderate        |            |              |              |               |
|                           | Abraham (2016) [RCT] <sup>168</sup>    | Aerobic exercise vs muscle strengthening exercise at 12 weeks<br>SMD 0.47 (-0.14, 1.09) | BDI, BL / 12 weeks, mean (SD)<br>Aerobic: 20.6 (5.3) / 20.1 (7.1)<br>Muscle strengthening: 19.4 (5.0) / 17.3 (4.4)<br>Control: 19.1 (5.6) / 20.1 (5.9)                                                                                                                            |                 | L          | L            | H/UC         | L             |
|                           | Bogdanovic (2015) [RCT] <sup>175</sup> |                                                                                         | BDI at 6 weeks, N(%)<br>Aerobic:<br>Normal = 4 (13.3)<br>Mild = 18 (60.0)<br>Borderline = 5 (16.7)<br>Moderate = 3 (10.0)<br>Severe = 0 (0.0)<br>Muscle strengthening:<br>Normal = 2 (6.7)<br>Mild = 19 (63.3)<br>Borderline = 6 (23.3)<br>Moderate = 3 (6.6)<br>Severe = 0 (0.0) |                 | H/UC       | H/UC         | H/UC         | H/UC          |

Alloc. Conc. = allocation concealment, AMSTAR2 = Assessing the Methodological Quality of Systematic Reviews, BDI = Beck Depression Inventory, BL = baseline, Blind. Asses. = Blinded assessors, Blind. Part. = blinded participants, CI = confidence interval, H/UC = high / unclear risk of bias, L = low risk of bias, Rand. Seq. = random sequence generation, RCT = randomised controlled trial, SD = standard deviation, SLE = systemic lupus erythematosus, SMD = standardised mean difference

Table – Aerobic + muscle strengthening exercise (SLE), SF36 results at final follow-up, mean (SD)

| Author (date)                                               | PCS           | MCS | GH          | PF          | RP          | RE          | SF          | BP          | V           | MH          |
|-------------------------------------------------------------|---------------|-----|-------------|-------------|-------------|-------------|-------------|-------------|-------------|-------------|
| Abrahamo (2016) [Aerobic] <sup>168</sup>                    |               |     | 49.3 (22.2) | 55.5 (28.4) | 49.8 (34.8) | 51.6 (25.9) | 48.3 (22.1) | 41.7 (28.4) | 63.5 (21.2) | 44.3 (19.4) |
| Abrahamo (2016) [muscle strengthening] <sup>168</sup>       |               |     | 35.1 (12.9) | 44.2 (14.3) | 27.7 (15.1) | 37.3 (28.7) | 38.6 (26.6) | 31.7 (15.0) | 26.6 (17.4) | 39.5 (17.3) |
| Ramsey-Goldman (2000) [Aerobic] <sup>177</sup>              | 7.00 (13.5) § |     |             |             |             |             |             |             |             |             |
| Ramsey-Goldman (2000) [Muscle strengthening] <sup>177</sup> | 2.50 (29.2) § |     |             |             |             |             |             |             |             |             |
| Timoteo (2018) [Exercise] <sup>178</sup>                    |               |     | 65 (33) §   | 73 (41) §   | 83 (50) §   | 72 (84) §   | 60 (82) §   | 81 (41) §   | 58 (43) §   | 65 (52) §   |
| Timoteo (2018) [Control] <sup>178</sup>                     |               |     | 62 (38) §   | 71 (38) §   | 50 (66) §   | 56 (87) §   | 60 (27) §   | 45 (46) §   | 39 (12) §   | 50 (32) §   |

§ Change from BL-7 months

BP = bodily pain, FU = follow-up, GH = general health, MCS = mental component score, MH = mental health, PCS = physical component score, PF = physical function, RE = role emotional, RP = role physical, SD = standard deviation, SF = social functioning, SLE = systemic lupus erythematosus, V = vitality



## Supplementary table 57 – Description of original studies of muscle strengthening exercise in SLE

Table – Aerobic + muscle strengthening exercises (SLE), description of included studies

| Author (date) [country]                | Study design | Inclusion criteria                                                                                                                                                                                                                                                                   | Exposure detail                                                                                                                                    | N                       | Age years, mean (SD)                               | N (%) female | Funders             |
|----------------------------------------|--------------|--------------------------------------------------------------------------------------------------------------------------------------------------------------------------------------------------------------------------------------------------------------------------------------|----------------------------------------------------------------------------------------------------------------------------------------------------|-------------------------|----------------------------------------------------|--------------|---------------------|
| Abraham (2016) [Brazil] <sup>168</sup> | RCT          | ACR SLE criteria, aged ≥18 years<br>Exclusions: absolute of relative contraindications to physical exercise according to the American College of Sports Medicine guidelines, not available for two consecutive sessions, participation in regular physical activity in past 6 months | 1) Cardiovascular training – walking and exercise bike<br>2) Muscle strengthening training – free weights and elastic band exercises<br>p) Control | 1) 21<br>2) 21<br>p) 21 | 1) 46.1 (14.1)<br>2) 43.8 (14.6)<br>p) 39.1 (14.4) | 61 (96.8)    | <b>Not reported</b> |

ACR = American College of Rheumatology, N = number, RCT = randomised controlled trial, SD = standard deviation, SLE = systemic lupus erythematosus

## Supplementary table 58 – Results from reviews and interventional studies of muscle strengthening exercise in SLE

Table – Muscle strengthening exercises (SLE), results and quality assessment

| Outcome (outcome measure) | Study (date) [study type]            | Standardised result, SMD (95% CI) unless otherwise stated                              | Natural result                                                                                                                                             | AMSTAR2 quality | Rand. Seq. | Alloc. Conc. | Blind. Part. | Blind. Asses. |
|---------------------------|--------------------------------------|----------------------------------------------------------------------------------------|------------------------------------------------------------------------------------------------------------------------------------------------------------|-----------------|------------|--------------|--------------|---------------|
| Disease activity          | Abrahamo (2016) [RCT] <sup>168</sup> | <u>Muscle strengthening exercise vs control at 12 weeks</u><br>SMD 0.22 (-0.39, 0.83)  | <u>SLEDAI, BL / 12 weeks, mean (SD)</u><br>Aerobic: 1.8 (0.6) / 1.6 (0.9)<br>Muscle strengthening: 1.4 (0.6) / 1.3 (0.5)<br>Control: 2.3 (1.7) / 1.2 (0.4) |                 | L          | L            | H/UC         | L             |
| Depression                | Abrahamo (2016) [RCT] <sup>168</sup> | <u>Muscle strengthening exercise vs control at 12 weeks</u><br>SMD -0.54 (-1.15, 0.08) | <u>BDI, BL / 12 weeks, mean (SD)</u><br>Aerobic: 20.6 (5.3) / 20.1 (7.1)<br>Mstrengthening: 19.4 (5.0) / 17.3 (4.4)<br>Control: 19.1 (5.6) / 20.1 (5.9)    |                 | L          | L            | H/UC         | L             |

Alloc. Conc. = allocation concealment, AMSTAR2 = Assessing the Methodological Quality of Systematic Reviews, BDI = Beck Depression Inventory, BL = baseline, Blind. Asses. = Blinded assessors, Blind. Part. = blinded participants, CI = confidence interval, H/UC = high / unclear risk of bias, L = low risk of bias, Rand. Seq. = random sequence generation, RCT = randomised controlled trial, SD = standard deviation, SLE = systemic lupus erythematosus, SLEDAI = systemic lupus erythematosus disease activity index, SMD = standardised mean difference

Table – Muscle strengthening exercise (SLE), SF36 results at final follow-up, mean (SD)

| Author (date)                                         | PCS | MCS | GH          | PF          | RP          | RE          | SF          | BP          | V           | MH          |
|-------------------------------------------------------|-----|-----|-------------|-------------|-------------|-------------|-------------|-------------|-------------|-------------|
| Abrahamo (2016) [Muscle strengthening] <sup>168</sup> |     |     | 35.1 (12.9) | 44.2 (14.3) | 27.7 (15.1) | 37.3 (28.7) | 38.6 (26.6) | 31.7 (15.0) | 26.6 (17.4) | 39.5 (17.3) |
| Abrahamo (2016) [Control] <sup>168</sup>              |     |     | 39.2 (23.2) | 41.4 (15.7) | 29.7 (17.4) | 22.9 (11.0) | 35.2 (27.9) | 24.6 (14.4) | 26.6 (14.3) | 33.7 (18.9) |

BP = bodily pain, FU = follow-up, GH = general health, MCS = mental component score, MH = mental health, PCS = physical component score, PF = physical function, RE = role emotional, RP = role physical, SD = standard deviation, SF = social functioning, SLE = systemic lupus erythematosus, V = vitality

## Supplementary table 59 – Description of reviews of studies of aerobic exercise in axSpA

Table – Aerobic exercise (axSpA), description of reviews

| Authors (date)                | Review type | Study type included | Exposure detail                                        | Number of studies included | Funders                                                                                                                |
|-------------------------------|-------------|---------------------|--------------------------------------------------------|----------------------------|------------------------------------------------------------------------------------------------------------------------|
| Regel (2017) <sup>179</sup>   | SR          | RCTs                | Aerobic exercises including walking and rehabilitation | 2                          | <b>Professional bodies</b> (European League Against Rheumatism, Assessment of Spondyloarthritis international Society) |
| O'Dwyer (2014) <sup>180</sup> | SR          | RCTs                | Unsupervised exercise interventions vs Supervised      | 4                          | <b>Not reported</b> – Authors declared no conflicts of interest                                                        |

axSpA = axial spondyloarthritis, RCT = randomised controlled trial, SR = systematic review

## Supplementary table 60 – Description of original studies of aerobic exercise in axSpA

Table –Aerobic exercise (axSpA), description of included studies

| Author (date) [country]                        | Study design | Inclusion criteria                                                                                                                                                                                                                                                                                                                                                                                                                                                                                                                    | Exposure detail                                                                                                                              | N              | Age years, mean (SD)             | N (%) female                 | Funders                                                                                                                                                                                                                                                                                         |
|------------------------------------------------|--------------|---------------------------------------------------------------------------------------------------------------------------------------------------------------------------------------------------------------------------------------------------------------------------------------------------------------------------------------------------------------------------------------------------------------------------------------------------------------------------------------------------------------------------------------|----------------------------------------------------------------------------------------------------------------------------------------------|----------------|----------------------------------|------------------------------|-------------------------------------------------------------------------------------------------------------------------------------------------------------------------------------------------------------------------------------------------------------------------------------------------|
| Karahan (2016) [Turkey] <sup>181</sup>         | RCT          | Modified New York criteria, aged 18-65 years, lack of regular exercise during previous 6 months, ability to understand questionnaires<br>Exclusions: cardiopulmonary dysfunction, central or peripheral neurological disease, issues hindering standing, psychiatric disorder, visual disorder, hearing disorder                                                                                                                                                                                                                      | 1) Exergram – Microsoft Xbox 360 Kinect game console – 30 mins per day, 5x per week<br>p) No exercise program                                | 1) 28<br>p) 29 | 1) 36.1 (12.4)<br>p) 36.6 (11.3) | 1) 6 (21.4)<br>p) 7 (24.1)   | <b>Not reported</b> – Authors declared no conflicts of interest                                                                                                                                                                                                                                 |
| Jennings (2015) [Brazil] <sup>182</sup>        | RCT          | Modified New York criteria, aged 18-60 years, functional class I-II, stable DMARDs for 3 months, stable steroids of 4 weeks<br>Exclusions: Uncontrolled hypertension, history of heart failure / coronary revascularization, history of syncope or exercise induced arrhythmias, decompensated Type 1 diabetes, severe psychiatric diseases, fibromyalgia, other medical conditions more incapacitating than AS, history of regular physical activity in last 6 months, arthroplasty in last year, other condition preventing walking | 1) Aerobic exercise (walking) with stretching, 80 mins 3x per week<br>p) Stretching exercises only                                           | 1) 35<br>p) 35 | 1) 42.9 (9.9)<br>p) 40.2 (9.3)   | 1) 9 (25.7)<br>p) 12 (34.3)  | <b>Charity</b> (São Paulo Research Foundation)                                                                                                                                                                                                                                                  |
| Niedermann (2013) [Switzerland] <sup>183</sup> | RCT          | Modified New York Criteria, aged >18 years, communicate in German<br>Exclusions: Severe heart disease, inability to use exercise bike                                                                                                                                                                                                                                                                                                                                                                                                 | 1) Cardiovascular training and flexibility<br>p) Attention control – Monthly 2.5 hour discussion groups on coping strategies and mindfulness | 1) 53<br>p) 53 | 1) 50.1 (11.9)<br>p) 47.6 (12.4) | 1) 19 (35.8)<br>p) 19 (35.8) | <b>Hospital</b> (University Hospital Zurich), <b>Charity</b> (Schweizerische Vereinigung Morbus Bechterew, Böhni Foundation for Research in Rheumatology, Zurich Rheumatology Foundation, Physiotherapie Wissenschaften Foundation), <b>Professional body</b> (Swiss Physiotherapy Association) |

axSpA = axial spondyloarthritis, int. = intervention, N = number, RCT = randomised controlled trial, SD = standard deviation

Table –Aerobic exercise (axSpA), description of included studies

| Author (date) [country]                    | Study design    | Inclusion criteria                                                                                                                                                                                                       | Exposure detail                                                                                                                                                                                                                                                                          | N                | Age years, mean (SD)        | N (%) female                   | Funders                                                                                                                                        |
|--------------------------------------------|-----------------|--------------------------------------------------------------------------------------------------------------------------------------------------------------------------------------------------------------------------|------------------------------------------------------------------------------------------------------------------------------------------------------------------------------------------------------------------------------------------------------------------------------------------|------------------|-----------------------------|--------------------------------|------------------------------------------------------------------------------------------------------------------------------------------------|
| Sweeney (2002) [UK] <sup>185</sup>         | RCT             | Aged 16-65 years                                                                                                                                                                                                         | 1) Delivered a home exercise regime video, booklet and wall chart<br>p) Usual care                                                                                                                                                                                                       | 1) 100<br>p) 100 | 1) 47 (10.2)<br>p) 47 (9.6) | 1) 30 (30%) F<br>p) 32 (32%) F | <b>Industry</b> (Bupa), <b>Charity</b> (National Ankylosing Spondylitis Society, John Coates Charitable Trust, and Col. W.W. Pilkington Trust) |
| Ajeganova (2016) [Sweden] <sup>184</sup> § | Single arm int. | Aged 18-80 years, clear clinical need for rehab, outpatient physiotherapy not sufficient<br>Exclusions: severe handicap that made evaluation assessments impossible, difficulties in answering questionnaires in Swedish | Intervention took place in Marbella and Tenerife. Training was performed individually and in groups – at least 3 scheduled activities per day with a minimum of 45 mins each, 5 days per week. These consisted dynamic and static exercises on land and in a temperature controlled pool | 37               | 56.5 (1..3)                 | 45.9%                          | <b>Charity</b> (The Swedish Rheumatism Association and King Gustav V 80 year's Foundation)                                                     |
| Brophy (2013) [UK] <sup>186</sup>          | Pros. cohort    | AS patients part of the MRC / NISCHR patient research cohort                                                                                                                                                             | International Physical activity questionnaire                                                                                                                                                                                                                                            | 329              | 55 (14)                     | 21%                            | <b>Government</b> (MRC, NISCHR)                                                                                                                |
| Ward (2002) [USA] <sup>187</sup>           | Pros. cohort    | Modified New York criteria, aged ≥18 years, communicate in English, completed ≥3 functional disability questionnaires<br>Exclusions: inflammatory bowel disease                                                          | Self-reported number of days per week with exercise – computed exercise minutes per week                                                                                                                                                                                                 | 212              | 47.8 (13.6)                 | 63 (29.7)                      | <b>Charity</b> (Bartman Fondation)                                                                                                             |
| Uhrin (2000) [USA] <sup>188</sup>          | Pros. cohort    | Modified New York criteria, aged ≥18 years, communicate in English<br>Exclusions: history of inflammatory bowel disease                                                                                                  | Self-reported number of days per week with exercise                                                                                                                                                                                                                                      | 220              | 47.5 (13.7)                 | 70 (31.8)                      | <b>Charity</b> (Bartman Fondation)                                                                                                             |

§ Ajeganova et al<sup>184</sup> included patients with many different rheumatic diseases, including juvenile idiopathic arthritis, and analysed the data together. The only outcome that was only measured in one of the rheumatic diseases included in this review was the BASFI and therefore this study is in the AS section of the report.

axSpA = axial spondyloarthritis, MRC = Medical Research Council, N = number, NISCHR = National Institute for Social Care and Health Research, Pros. = prospective, RCT = randomised controlled trial, SD = standard deviation, UK = United Kingdom, USA = United States of America

## Supplementary table 61 – Results from reviews and interventional studies of aerobic exercise in axSpA

Table – Aerobic exercise (axSpA), results and quality assessment

| Outcome (outcome measure) | Study (date) [study type]                              | Standardised result, SMD (95% CI) unless otherwise stated                                           | Natural result                                                                                                                                                                                                                                                                                                             | AMSTAR2 quality | Rand. Seq. | Alloc. Conc. | Blind. Part. | Blind. Asses. |
|---------------------------|--------------------------------------------------------|-----------------------------------------------------------------------------------------------------|----------------------------------------------------------------------------------------------------------------------------------------------------------------------------------------------------------------------------------------------------------------------------------------------------------------------------|-----------------|------------|--------------|--------------|---------------|
| Pain                      | Karahan (2016) [RCT] <sup>181</sup>                    | <u>Exercise vs control at 8 weeks</u><br>SMD -0.67 (-1.21, -0.14)                                   | <u>Pain VAS, BL / 8 weeks, mean (SD)</u><br>Exercise: 4.9 (2.0) / 3.6 (1.7)<br>Control: 5.1 (2.2) / 5.0 (2.4)                                                                                                                                                                                                              |                 | H/UC       | L            | H/UC         | H/UC          |
|                           | Niedermann (2013) [RCT] <sup>183</sup>                 | <u>Exercise vs control at 3 months</u><br>SMD -0.07 (-0.45, 0.31)                                   | <u>BAS-G – pain, BL / 3 months, mean (SD †)</u><br>Exercise: 3.2 (2.0) / 3.25 (2.1)<br>Control: 3.5 (2.5) / 3.39 (2.0)                                                                                                                                                                                                     |                 | L          | L            | H/UC         | L             |
|                           | Bespoke meta-analysis including <sup>181;183</sup>     | <u>Exercise vs control</u><br>SMD -0.34 (-0.93, 0.25), I <sup>2</sup> 69.2%                         |                                                                                                                                                                                                                                                                                                                            |                 |            |              |              |               |
| Function                  | Regel (2017) [SR] <sup>179</sup>                       |                                                                                                     | One study reporting no difference                                                                                                                                                                                                                                                                                          | Moderate        |            |              |              |               |
|                           | Karahan (2016) [RCT] <sup>181</sup>                    | <u>Exercise vs control at 8 weeks</u><br>SMD -0.66 (-1.19, -0.13)                                   | <u>BASFI, BL / 8 weeks, mean (SD)</u><br>Exercise: 3.7 (1.5) / 2.9 (1.3)<br>Control: 3.9 (1.6) / 3.9 (1.7)                                                                                                                                                                                                                 |                 | H/UC       | L            | H/UC         | H/UC          |
|                           | Jennings (2015) [RCT] <sup>182</sup>                   | <u>Exercise vs control at 12 months</u><br>SMD 0.01 (-0.46, 0.48)<br>HAQ-S: SMD -0.14 (-0.61, 0.33) | <u>BASFI, BL / 12 months / 24 months, mean (SD)</u><br>Exercise: 4.28 (2.78) / 3.37 (2.49) / 3.47 (2.48)<br>Control: 4.27 (2.32) / 3.34 (2.07) / 3.73 (2.19)<br><u>HAQ-S, BL / 12 weeks / 24 weeks, mean (SD)</u><br>Exercise: 1.04 (0.59) / 0.84 (0.52) / 0.92 (0.57)<br>Control: 1.01 (0.55) / 0.92 (0.62) / 0.97 (0.59) |                 | L          | L            | H/UC         | L             |
|                           | Niedermann (2013) [RCT] <sup>183</sup>                 | <u>Exercise vs control at 3 months</u><br>SMD 0.09 (-0.29, 0.47)                                    | <u>BASFI, BL / 3 months, mean (SD †)</u><br>Exercise: 2.4 (1.9) / 2.53 (1.5)<br>Control: 2.4 (2.1) / 2.40 (1.5)                                                                                                                                                                                                            |                 | L          | L            | H/UC         | L             |
|                           | Sweeney (2002) [RCT] <sup>185</sup>                    | <u>Exercise vs control at 6 months</u><br>SMD -0.15 (-0.43, 0.13)                                   | <u>BASFI, BL / 6 months, mean (SD)</u><br>Exercise: 3.5 (2.4) / 3.06 (2.35)<br>Control: 3.6 (2.4) / 3.43 (2.61)                                                                                                                                                                                                            |                 | H/UC       | H/UC         | H/UC         | H/UC          |
|                           | Bespoke meta-analysis including <sup>181-183;185</sup> | <u>Exercise vs control</u><br>SMD -0.14 (-0.41, 0.13), I <sup>2</sup> 44.4%                         |                                                                                                                                                                                                                                                                                                                            |                 |            |              |              |               |
|                           | Ajeganova (2016) [Single arm int.] <sup>184 §</sup>    |                                                                                                     | <u>BASFI, BL / 4 weeks / 1 year, mean (SD)</u><br>4.14 (2.57) / 2.34 (1.83) / 3.70 (2.27)                                                                                                                                                                                                                                  |                 |            |              |              |               |

† SD calculated from standard error in paper

Alloc. Conc. = allocation concealment, AMSTAR2 = Assessing the Methodological Quality of Systematic Reviews, axSpA = axial spondyloarthritis, BAS-G = Bath Ankylosing Spondylitis Global Score, BASFI = Bath Ankylosing Spondylitis Functional Index, BL = baseline, Blind. Asses. = Blinded assessors, Blind. Part. = blinded participants, CI = confidence interval, H/UC = high / unclear risk of bias, HAQ-S = Health Assessment Questionnaire for the Spondyloarthropathies, L = low risk of bias, Rand. Seq. = random sequence generation, RCT = randomised controlled trial, SD = standard deviation, SMD = standardised mean difference, VAS = visual analogue scale

Table – Aerobic exercise (axSpA), results and quality assessment

| Outcome (outcome measure) | Study (date) [study type]                              | Standardised result, SMD (95% CI) unless otherwise stated                                                        | Natural result                                                                                                                                                                                                                                                                                                                    | AMSTAR2 quality | Rand. Seq. | Alloc. Conc. | Blind. Part. | Blind. Asses. |
|---------------------------|--------------------------------------------------------|------------------------------------------------------------------------------------------------------------------|-----------------------------------------------------------------------------------------------------------------------------------------------------------------------------------------------------------------------------------------------------------------------------------------------------------------------------------|-----------------|------------|--------------|--------------|---------------|
| Disease activity          | Regel (2017) [SR] <sup>179</sup>                       |                                                                                                                  | One study reporting small effects in both groups                                                                                                                                                                                                                                                                                  | Moderate        |            |              |              |               |
|                           | O'Dwyer (2014) [SR] <sup>180</sup>                     |                                                                                                                  | 0/2 studies reported improvements in disease activity in favour of aerobic exercise                                                                                                                                                                                                                                               | Moderate        |            |              |              |               |
|                           | Karahan (2016) [RCT] <sup>181</sup>                    | <u>Exercise vs control at 8 weeks</u><br>SMD -0.51 (-1.04, 0.02)                                                 | <u>BASDAI, BL / 8 weeks, mean (SD)</u><br>Exercise: 4.1 (1.8) / 3.2 (1.3)<br>Control: 4.2 (2.1) / 4.1 (2.1)                                                                                                                                                                                                                       |                 | H/UC       | L            | H/UC         | H/UC          |
|                           | Jennings (2015) [RCT] <sup>182</sup>                   | <u>Exercise vs control at 12 months</u><br>BASDAI: SMD -0.02 (-0.49, 0.45)<br>ASDAS-CRP: SMD -0.02 (-0.49, 0.45) | <u>BASDAI, BL / 12 months / 24 months, mean (SD)</u><br>Exercise: 3.46 (2.39) / 2.75 (2.12) / 2.87 (1.97)<br>Control: 3.62 (2.06) / 2.79 (1.99) / 3.27 (2.07)<br><u>ASDAS-CRP, BL / 12 months / 24 months, mean (SD)</u><br>Exercise: 2.44 (1.07) / 1.98 (0.93) / 2.10 (0.92)<br>Control: 2.24 (0.91) / 2.00 (0.94) / 2.24 (0.89) |                 | L          | L            | H/UC         | L             |
|                           | Niedermann (2013) [RCT] <sup>183</sup>                 | <u>Exercise vs control at 3 months</u><br>BASDAI: SMD -0.19 (-0.57, 0.20)<br>ASDAS: 0.09 (-0.29, 0.47)           | <u>BASDAI, BL / 3 months, mean (SD †)</u><br>Exercise: 3.3 (1.9) / 3.07 (1.5)<br>Control: 3.6 (2.1) / 3.35 (1.5)<br><u>ASDAS, BL / 3 months, mean (SD †)</u><br>Exercise: 2.2 (0.8) / 2.26 (1.09)<br>Control: 2.3 (1.0) / 2.16 (1.09)                                                                                             |                 | L          | L            | H/UC         | L             |
|                           | Sweeney (2002) [RCT] <sup>185</sup>                    | <u>Exercise vs control at 6 months</u><br>SMD 0.08 (-0.20, 0.35)                                                 | <u>BASDAI, BL / 6 months, mean (SD)</u><br>Exercise: 3.9 (2.4) / 3.65 (2.00)<br>Control: 3.8 (2.3) / 3.49 (2.16)                                                                                                                                                                                                                  |                 | H/UC       | H/UC         | H/UC         | H/UC          |
|                           | Bespoke meta-analysis including <sup>181-183,185</sup> | <u>Exercise vs control</u><br>SMD -0.10 (-0.34, 0.13), I <sup>2</sup> 28.2%                                      |                                                                                                                                                                                                                                                                                                                                   |                 |            |              |              |               |

† SD calculated from standard error in paper

Alloc. Conc. = allocation concealment, AMSTAR2 = Assessing the Methodological Quality of Systematic Reviews, axSpA = axial spondyloarthritis, ASDAS-CRP = Ankylosing Spondylitis Disease Activity Score (C-reactive protein), BASDAI = Bath Ankylosing Spondylitis Disease Activity Index, BL = baseline, Blind. Asses. = Blinded assessors, Blind. Part. = blinded participants, CI = confidence interval, H/UC = high / unclear risk of bias, L = low risk of bias, Rand. Seq. = random sequence generation, RCT = randomised controlled trial, SD = standard deviation, SMD = standardised mean difference

Table – Aerobic exercise (axSpA), results and quality assessment

| Outcome (outcome measure) | Study (date) [study type]                          | Standardised result, SMD (95% CI) unless otherwise stated                   | Natural result                                                                                                                                               | AMSTAR2 quality | Rand. Seq. | Alloc. Conc. | Blind. Part. | Blind. Asses. |
|---------------------------|----------------------------------------------------|-----------------------------------------------------------------------------|--------------------------------------------------------------------------------------------------------------------------------------------------------------|-----------------|------------|--------------|--------------|---------------|
| Spinal mobility           | Regel (2017) [SR] <sup>179</sup>                   |                                                                             | One study reporting small effect sizes in both arms                                                                                                          | Moderate        |            |              |              |               |
|                           | O'Dwyer (2014) [SR] <sup>180</sup>                 |                                                                             | 0/2 studies reported improvements in spinal mobility in favour of aerobic exercise                                                                           | Moderate        |            |              |              |               |
|                           | Jennings (2015) [RCT] <sup>182</sup>               | <u>Exercise vs control at 12 months</u><br>SMD 0.14 (-0.33, 0.61)           | <u>BASMI, BL / 12 months / 24 months, mean (SD)</u><br>Exercise: 5.15 (1.95) / 4.93 (1.94) / 4.95 (2.03)<br>Control: 4.79 (2.22) / 4.65 (2.14) / 4.61 (2.24) |                 | L          | L            | H/UC         | L             |
|                           | Niedermann (2013) [RCT] <sup>183</sup>             | <u>Exercise vs control at 3 months</u><br>SMD -0.22 (-0.60, 0.17)           | <u>BASMI, BL / 3 months, mean (SD †)</u><br>Exercise: 2.9 (2.1) / 2.64 (1.8)<br>Control: 2.8 (1.9) / 3.02 (1.7)                                              |                 | L          | L            | H/UC         | L             |
|                           | Bespoke meta-analysis including <sup>182;183</sup> | <u>Exercise vs control</u><br>SMD -0.07 (-0.41, 0.28), I <sup>2</sup> 24.1% |                                                                                                                                                              |                 |            |              |              |               |
| Patient global            | Sweeney (2002) [RCT] <sup>185</sup>                | <u>Exercise vs control at 6 months</u><br>SMD -0.00 (-0.28, 0.27)           | <u>BAS-G, BL / 6 months, mean (SD)</u><br>Exercise: 4.0 (2.6) / 3.60 (2.61)<br>Control: 3.7 (2.6) / 3.61 (2.81)                                              |                 | H/UC       | H/UC         | H/UC         | H/UC          |
| QoL                       | O'Dwyer (2014) [SR] <sup>180</sup>                 |                                                                             | 0/2 studies reported improvements in QoL in favour of aerobic exercise                                                                                       | Moderate        |            |              |              |               |
|                           | Karahan (2016) [RCT] <sup>181</sup>                | <u>Exercise vs control at 8 weeks</u><br>SMD -0.64 (-1.17, -0.11)           | <u>ASQOL, BL / 8 weeks, mean (SD)</u><br>Exercise: 9.5 (6.1) / 6.8 (4.3)<br>Control: 10.2 (6.0) / 10.3 (6.4)                                                 |                 | H/UC       | L            | H/UC         | H/UC          |
|                           | Niedermann (2013) [RCT] <sup>183</sup>             | <u>Exercise vs control at 3 months</u><br>SMD 0.06 (-0.32, 0.44)            | <u>EQ5D, BL / 3 months, mean (SD †)</u><br>Exercise: 64.5 (22.0) / 64.24 (22.2)<br>Control: 65.9 (21.2) / 63.01 (21.3)                                       |                 | L          | L            | H/UC         | L             |
|                           | Bespoke meta-analysis including <sup>181;183</sup> | <u>Exercise vs control</u><br>SMD -0.32 (-0.89, 0.25), I <sup>2</sup> 67.2% |                                                                                                                                                              |                 |            |              |              |               |

† SD calculated from standard error in paper

Alloc. Conc. = allocation concealment, AMSTAR2 = Assessing the Methodological Quality of Systematic Reviews, ASQOL = Ankylosing Spondylitis Quality of Life, axSpA = axial spondyloarthritis, BAS-G = Bath Ankylosing Spondylitis Global Score, BASMI = Bath Ankylosing Spondylitis Metrology Index, BL = baseline, Blind. Asses. = Blinded assessors, Blind. Part. = blinded participants, CI = confidence interval, H/UC = high / unclear risk of bias, L = low risk of bias, Rand. Seq. = random sequence generation, RCT = randomised controlled trial, SD = standard deviation, SMD = standardised mean difference



Table – Aerobic exercise (axSpA), results and quality assessment

| Outcome (outcome measure) | Study (date) [study type]                          | Standardised result, SMD (95% CI) unless otherwise stated                 | Natural result                                                                                                                                                                | AMSTAR2 quality | Rand. Seq. | Alloc. Conc. | Blind. Part. | Blind. Asses. |
|---------------------------|----------------------------------------------------|---------------------------------------------------------------------------|-------------------------------------------------------------------------------------------------------------------------------------------------------------------------------|-----------------|------------|--------------|--------------|---------------|
| Fatigue                   | Niedermann (2013) [RCT] <sup>183</sup>             | <u>Exercise vs control at 3 months</u><br>SMD -0.24 (-0.63, 0.14)         | <u>BASDAI - fatigue, BL / 3 months, mean (SD †)</u><br>Exercise: 4.4 (2.4) / 3.73 (2.3)<br>Control: 5.0 (2.7) / 4.29 (2.3)                                                    |                 | L          | L            | H/UC         | L             |
| Anxiety                   | Niedermann (2013) [RCT] <sup>183</sup>             | <u>Exercise vs control at 3 months</u><br>SMD -0.12 (-0.51, 0.26)         | <u>HADS-Anxiety, BL / 3 months, mean (SD †)</u><br>Exercise: 6.9 (5.3) / 6.27 (2.5)<br>Control: 6.7 (4.5) / 6.58 (2.5)                                                        |                 | L          | L            | H/UC         | L             |
| Depression                | Niedermann (2013) [RCT] <sup>183</sup>             | <u>Exercise vs control at 3 months</u><br>SMD 0.28 (-0.11, 0.66)          | <u>HADS-Depression, BL / 3 months, mean (SD †)</u><br>Exercise: 5.2 (4.4) / 5.10 (2.3)<br>Control: 5.0 (4.5) / 4.48 (2.2)                                                     |                 | L          | L            | H/UC         | L             |
| Self-efficacy             | Sweeney (2002) [RCT] <sup>185</sup>                | <u>Exercise vs control at 6 months</u><br>SMD 0.48 (0.20, 0.77)           | <u>Stanford self-efficacy - pain, BL / 6 months, mean (SD)</u><br>Exercise: 6.49 (1.8) / 6.80 (1.21)<br>Control: 6.06 (2.1) / 6.24 (1.1)                                      |                 | H/UC       | H/UC         | H/UC         | H/UC          |
| CRP                       | Jennings (2015) [RCT] <sup>182</sup>               | <u>Exercise vs control at 12 months</u><br>SMD -0.07 (-0.54, 0.40)        | <u>CRP, BL / 12 months / 24 months, mean (SD)</u><br>Exercise: 10.49 (11.90) / 7.14 (8.21) / 6.53 (7.33)<br>Control: 6.01 (7.33) / 4.95 (4.86) / 7.84 (11.59)                 |                 | L          | L            | H/UC         | L             |
|                           | Niedermann (2013) [RCT] <sup>183</sup>             | <u>Exercise vs control at 3 months</u><br>SMD 0.17 (-0.21, 0.55)          | <u>CRP, BL / 3 months, mean (SD †)</u><br>Exercise: 7.5 (9.8) / 6.27 (7.9)<br>Control: 6.4 (8.7) / 4.95 (7.8)                                                                 |                 | L          | L            | H/UC         | L             |
|                           | Bespoke meta-analysis including <sup>182,183</sup> | <u>Exercise vs control</u><br>SMD 0.07 (-0.22, 0.37), I <sup>2</sup> 0.0% |                                                                                                                                                                               |                 |            |              |              |               |
| ESR                       | Jennings (2015) [RCT] <sup>182</sup>               | <u>Exercise vs control at 12 months</u><br>SMD 0.27 (-0.20, 0.74)         | <u>ESR, BL / 12 months / 24 months, mean (SD)</u><br>Exercise: 18.5 (12.5) / 17.5 (12.8) / 20.5 (15.2)<br>Control: 17.1 (13.6) / 14.1 (12.5) / 14.7 (9.7)                     |                 | L          | L            | H/UC         | L             |
| Walk-test                 | Jennings (2015) [RCT] <sup>182</sup>               | <u>Exercise vs control at 12 months</u><br>SMD 0.85 (0.36, 1.34)          | <u>6MWT, BL / 12 months / 24 months, mean (SD)</u><br>Exercise: 443.14 (51.50) / 479.97 (54.56) / 473.53 (54.68)<br>Control: 423.81 (64.17) / 434.48 (52.56) / 432.14 (45.87) |                 | L          | L            | H/UC         | L             |

† SD calculated from standard error in paper

6MWT = six minute walk test, Alloc. Conc. = allocation concealment, AMSTAR2 = Assessing the Methodological Quality of Systematic Reviews, axSpA = axial spondyloarthritis, BL = baseline, Blind. Asses. = Blinded assessors, Blind. Part. = blinded participants, CI = confidence interval, CRP = C-reactive protein, ESR = erythrocyte Sedimentation Rate, H/UC = high / unclear risk of bias, HADS = Hospital Anxiety and Depression Scales, L = low risk of bias, Rand. Seq. = random sequence generation, RCT = randomised controlled trial, SD = standard deviation, SMD = standardised mean difference

*Table – Aerobic + muscle strengthening exercise (axSpA), SF36 results at final follow-up, mean (SD)*

| Author (date)                             | PCS | MCS | GH          | PF          | RP          | RE          | SF          | BP          | V           | MH          |
|-------------------------------------------|-----|-----|-------------|-------------|-------------|-------------|-------------|-------------|-------------|-------------|
| Jennings (2015) [exercise] <sup>182</sup> |     |     | 56.6 (23.1) | 66.3 (19.8) | 57.9 (42.8) | 58.0 (46.0) | 74.1 (24.4) | 65.0 (22.6) | 62.7 (24.1) | 71.1 (21.6) |
| Jennings (2015) [control] <sup>182</sup>  |     |     | 46.9 (22.9) | 62.4 (20.8) | 47.9 (40.8) | 54.1 (40.5) | 66.6 (26.8) | 60.3 (22.5) | 59.6 (21.7) | 66.3 (22.0) |

axSpA = axial spondyloarthritis, BL = baseline, BP = bodily pain, FU = follow-up, GH = general health, IQR = interquartile range, MCS = mental component score, MH = mental health, PCS = physical component score, PF = physical function, RE = role emotional, RP = role physical, SD = standard deviation, SF = social functioning, V = vitality

## Supplementary table 62 – Results from observational studies of aerobic exercise in axSpA

Table – Aerobic exercise (axSpA), results and quality assessment of observational studies

| Outcome (outcome measure) | Study (date) [study type]                   | Standardised result, SMD (95% CI) unless otherwise stated | Natural result                                                                                                                                                                                                                                                                                                                                                                                                                                                                                                                               | Study Pop. | Attr. | Prog. Meas. | Outc. Meas. | Conf. | Stats. |
|---------------------------|---------------------------------------------|-----------------------------------------------------------|----------------------------------------------------------------------------------------------------------------------------------------------------------------------------------------------------------------------------------------------------------------------------------------------------------------------------------------------------------------------------------------------------------------------------------------------------------------------------------------------------------------------------------------------|------------|-------|-------------|-------------|-------|--------|
| Pain                      | Uhrin (2000) [Pros. cohort] <sup>188</sup>  |                                                           | <u>Pain, &lt;30 exercise mins per week = ref, adjusted mean</u><br>31-90 mins per week: 0.13<br>91-200 mins per week: 0.008<br>> 200 mins per week: -0.035                                                                                                                                                                                                                                                                                                                                                                                   | L          | L     | M           | L           | L     | L      |
| Function                  | Brophy (2013) [Pros. cohort] <sup>186</sup> |                                                           | <u>BASFI, improvement in function compared to low physical activity, regression coefficient (95% CI)</u><br><u>Low disease activity</u><br>Medium physical activity: -8.9 (-17.9, 0.02)<br>High physical activity: -14.0 (-23.3, -4.8)<br><u>Moderate disease activity</u><br>Medium physical activity: -15.4 (-24.4, -6.5)<br>High physical activity: -21.3 (-30.2, 12.5)<br><u>High disease activity</u><br>Medium physical activity: -8.0 (-16.0, -0.08)<br>High physical activity: -19.9 (-27.9, -11.8)<br>[Analyses controlled for age] | L          | M     | M           | L           | M     | L      |
|                           | Ward (2002) [Pros. cohort] <sup>187</sup>   |                                                           | <u>Progression in HAQ over time - regression coefficient (95% CI) - univariable</u><br>per 10 min recreational exercise per week: 0.0000 (-0.003, 0.004)<br>per 1 day back exercise per week: -0.0022 (-0.0034, -0.001)                                                                                                                                                                                                                                                                                                                      | L          | M     | M           | L           | H     | L      |
|                           | Uhrin (2000) [Pros. cohort] <sup>188</sup>  |                                                           | <u>HAQ, &lt;30 exercise mins per week = ref, adjusted mean</u><br>31-90 mins per week: -0.01<br>91-200 mins per week: -0.006<br>> 200 mins per week: -0.32                                                                                                                                                                                                                                                                                                                                                                                   | L          | L     | M           | L           | L     | L      |
| Stiffness                 | Uhrin (2000) [Pros. cohort] <sup>188</sup>  |                                                           | <u>Stiffness, &lt;30 exercise mins per week = ref, adjusted mean</u><br>31-90 mins per week: 0.41<br>91-200 mins per week: -0.51<br>> 200 mins per week: -1.51                                                                                                                                                                                                                                                                                                                                                                               | L          | L     | M           | L           | L     | L      |

Attr. = attrition, axSpA = axial spondyloarthritis, , BASFI = Bath Ankylosing Spondylitis Functional Index, CI = confidence interval, Conf. = confounding, HAQ = Health Assessment Questionnaire, L = low risk of bias, M = moderate risk of bias, Outc. Meas = outcome measurement, Prog. Meas. = prognostic factor measurement, Pros = prospective, Rand. Seq. = random sequence generation, Stats. = statistical analysis, Study Pop. = study population

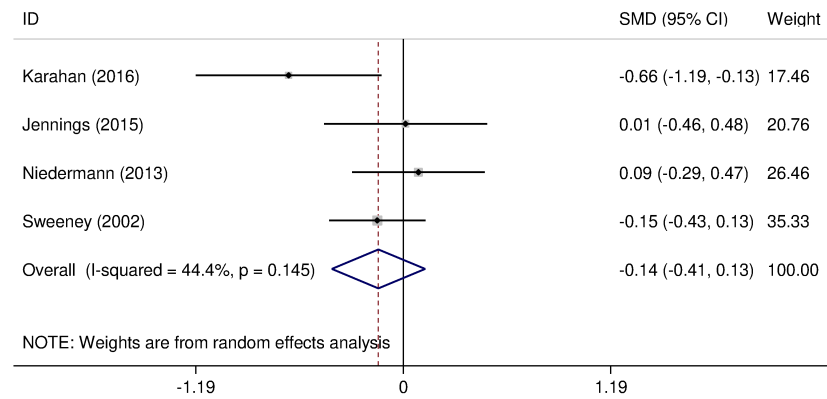

Figure – The effect of aerobic exercise on function (axSpA)

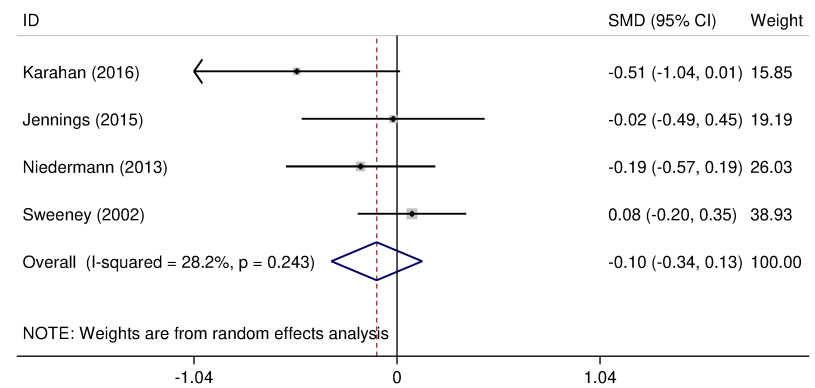

Figure – The effect of aerobic exercise on disease activity (axSpA)

## Supplementary table 63 – Description of reviews of studies of aerobic + muscle strengthening exercise in axSpA

Table – Aerobic + muscle strengthening exercises (axSpA), description of reviews

| Authors (date)                   | Review type | Study type included | Exposure detail                                                                                                                                            | Number of studies included | Funders                                                                                                                |
|----------------------------------|-------------|---------------------|------------------------------------------------------------------------------------------------------------------------------------------------------------|----------------------------|------------------------------------------------------------------------------------------------------------------------|
| Pecourneau (2018) <sup>189</sup> | MA          | RCTs                | Aerobic exercises of various types (including aquatic, Pilates, home-based – all included together)                                                        | 8                          | <b>Industry</b> (Abbott)                                                                                               |
| Chang (2016) <sup>190</sup>      | MA          | RCTs                | Specific exercise and physical therapies involving stretching, muscular strengthening and respiratory training vs standard exercise                        | 8                          | <b>Not reported</b> – Authors declared no conflicts of interest                                                        |
| Millner (2016) <sup>191</sup>    | MA          | RCTs                | A range of interventions included: Pilates, physiotherapy, group and home exercises, aerobic and flexibility                                               | 11                         | <b>Government</b> (Commonwealth Department of Health, Australia), <b>Industry</b> (Abbive)                             |
| Liang (2015) <sup>192</sup>      | MA          | RCTs                | Home-based exercise programs including muscle relaxation, exercises for spine, range of motion, stretching, muscle strengthening and respiratory exercises | 6                          | <b>Not reported</b> – Authors declared no conflicts of interest                                                        |
| Liang (2015) <sup>193</sup>      | MA          | RCTs                | Exercise regimes + TNFi treatment                                                                                                                          | 5                          | <b>Not reported</b> – Authors declared no conflicts of interest                                                        |
| Martins (2014) <sup>194</sup>    | MA          | RCTs                | Exercise regimes vs normal care                                                                                                                            | 3                          | <b>Not reported</b>                                                                                                    |
| Regel (2017) <sup>179</sup>      | SR          | RCTs                | Aerobic exercises including walking and rehabilitation                                                                                                     | 1                          | <b>Professional bodies</b> (European League Against Rheumatism, Assessment of Spondyloarthritis international Society) |
| Sharan (2017) <sup>195</sup>     | SR          | RCTs, reviews       | Studies of aerobic and strengthening included                                                                                                              | 30                         | <b>Not reported</b> – Authors declared no conflicts of interest                                                        |
| O'Dwyer (2014) <sup>180</sup>    | SR          | RCTs                | Therapeutic exercise interventions vs controls                                                                                                             | 7                          | <b>Not reported</b> – Authors declared no conflicts of interest                                                        |

axSpA = axial spondyloarthritis, MA = meta-analysis, RCT = randomised controlled trial, SR = systematic review, TNFi = tumour necrosis factor inhibitors

## Supplementary table 64 – Description of original studies of aerobic + muscle strengthening exercise in axSpA

Table – Aerobic + muscle strengthening exercises (axSpA), description of included studies

| Author (date) [country]               | Study design | Inclusion criteria                                                                                                                                                                                                                                                                                                        | Exposure detail                                                                                                                                                                                                                                                  | N              | Age years, mean (SD)                               | N (%) female                 | Funders                                                                                                                               |
|---------------------------------------|--------------|---------------------------------------------------------------------------------------------------------------------------------------------------------------------------------------------------------------------------------------------------------------------------------------------------------------------------|------------------------------------------------------------------------------------------------------------------------------------------------------------------------------------------------------------------------------------------------------------------|----------------|----------------------------------------------------|------------------------------|---------------------------------------------------------------------------------------------------------------------------------------|
| Sveaas (2019) [Norway] <sup>196</sup> | RCT          | ASAS axSpA criteria, aged 18-70 years, no change in TNFi in past three months, BASDAI $\geq$ 3.5 Not performed regular cardiorespiratory or strength exercises in past year<br>Exclusions: CV disease, other comorbidity involving reducing exercise capacity, inability to participate in supervised sessions, pregnancy | 1) High intensity cardiorespiratory and strengthening exercises<br>p) Usual care                                                                                                                                                                                 | 1) 50<br>p) 50 | Mean (range)<br>1) 45.1 (23-68)<br>p) 47.2 (24-69) | 1) 25 (50.0)<br>p) 28 (56.0) | <b>Charity</b> (Norwegian Foundation for Postgraduate Physiotherapist), <b>Professional body</b> (Norwegian Rheumatology Association) |
| Sveaas (2018) [Norway] <sup>197</sup> | RCT          | ASAS axSpA criteria, aged 18-70 years, no change in TNFi in past three months, BASDAI $\geq$ 3.5 Not performed regular cardiorespiratory or strength exercises in past year<br>Exclusions: pregnancy and established cardiovascular disease                                                                               | 1) 2x per week – high intensity interval training on treadmill and then 20 mins strength exercises. 1x per week – aerobic exercise session for 40 mins<br>p) Usual care                                                                                          | 1) 10<br>p) 14 | 1) 46.6 (13.6)<br>p) 49.9 (11.1)                   | 1) 8 (80.0)<br>p) 4 (28.6)   | <b>Not reported</b>                                                                                                                   |
| Aydin (2016) [Turkey] <sup>198</sup>  | RCT          | New York criteria, aged 20-65 years old, not practising regular exercise during previous 6 months, able to understand questionnaires, no co-existing systemic disease, no TNFi therapy, heart functional class I-III                                                                                                      | 1) Home based exercise – callisthenic exercises (consecutive and repetitive exercises aimed at training large muscle groups through aerobic and step routines)<br>2) Hospital based exercises – same as above                                                    | 1) 19<br>2) 18 | 1) 33.5 (7.7)<br>2) 35.8 (8.1)                     | 1) 8 (42.1)<br>2) 9 (50.0)   | <b>Not reported</b> – authors declared no conflict of interest                                                                        |
| Rosu (2014) [Romania] <sup>199</sup>  | RCT          | Modified New York Criteria, axial disease subset<br>Exclusions: Peripheral or mixed AS, those with total ankyloses of the spine, patients with ESR >30mm/hr or CRP >2x upper limit of normal                                                                                                                              | 1) Pilates, McKenzie and Heckscher training – 20 mins Pilates, 20 mins of Heckscher (aerobic exercise aiming to correct head posture, 10 mins McKenzie (aerobic exercise for lower back)<br>2) Step aerobic exercises for 20 mins + 10 min warm up and cool down | 1) 48<br>2) 48 | 1) 25.3 (3.8)<br>2) 25.0 (3.8)                     | 1) 9 (18.8)<br>2) 8 (16.7)   | <b>Not reported</b> – Authors declared no conflicts of interest                                                                       |
| Sveaas (2014) [Norway] <sup>200</sup> | RCT          | ASAS axSpA criteria, aged 18-70 years, no change in TNFi in past three months, BASDAI $\geq$ 3.5 Not performed regular cardiorespiratory or strength exercises in past year<br>Exclusions: pregnancy and established cardiovascular disease, inability to perform weekly exercise session in Oslo                         | 1) 2x per week – high intensity interval training on treadmill and then 20 mins strength exercises. 1x per week – aerobic exercise session for 40 mins<br>p) Usual care                                                                                          | 1) 10<br>p) 14 | 1) 46.6 (13.6)<br>p) 49.9 (11.1)                   | 1) 8 (80.0)<br>p) 4 (28.6)   | <b>Charity</b> (Norwegian Foundation for Postgraduate Physiotherapist)                                                                |

axSpA = axial spondyloarthritis, ASAS = Assessment of Spondyloarthritis, BASDAI = Bath Ankylosing Spondylitis Disease Activity Index, N = number, Pros. = prospective, RCT = randomised controlled trial, SD = standard deviation, TNFi = Tumour Necrosis Factor Inhibitors, UK = United Kingdom

Table – Aerobic + muscle strengthening exercises (axSpA), description of included studies

| Author (date) [country]                         | Study design | Inclusion criteria                                                                                                                                                                                                                                                                                                                                                                                                                                                                                                                                           | Exposure detail                                                                                                                                                                                                                              | N              | Age years, mean (SD)             | N (%) female                 | Funders                                              |
|-------------------------------------------------|--------------|--------------------------------------------------------------------------------------------------------------------------------------------------------------------------------------------------------------------------------------------------------------------------------------------------------------------------------------------------------------------------------------------------------------------------------------------------------------------------------------------------------------------------------------------------------------|----------------------------------------------------------------------------------------------------------------------------------------------------------------------------------------------------------------------------------------------|----------------|----------------------------------|------------------------------|------------------------------------------------------|
| Kjeken (2013) [Norway] <sup>201</sup>           | RCT          | Modified New York criteria, aged 18-65 years, BASDAI≥40mm, communicate in Norwegian<br>Exclusions: Coronary heart disease, pregnancy, impaired function due to other medical problems, surgery or rehabilitations in last 6 months, cognitive or mental impairment, started biologic drug therapy                                                                                                                                                                                                                                                            | 1) Physiotherapist designed weekly exercises programme in gym, pool and outdoors – involved muscle strength and fitness<br>p) Waitlist control                                                                                               | 1) 46<br>p) 49 | 1) 49.4 (10.3)<br>p) 48.6 (9.4)  | 1) 10 (21.7)<br>p) 23 (46.9) | <b>Government</b> (Health South-East, Norway)        |
| Analay (2003) [Turkey] <sup>202</sup>           | RCT          | Amor criteria, aged 18-55 years, able to participate in exercise<br>Exclusions: systemic organ involvement, severe deformities or limited hip and knee joint motion preventing cycling, treated by physiotherapist in last 3 months or practising regular exercise and those received DMARDs                                                                                                                                                                                                                                                                 | 1) Intensive exercise regime given by physiotherapist. Program included stretching, mobilization, aerobic exercises on exercise bike, strengthening exercises for lower and upper extremities and back<br>2) Practice same exercises at home | 1) 23<br>2) 22 | 1) 37.6 (11.3)<br>2) 34.3 (7.9)  | 1) 3 (13.0)<br>2) 4 (18.2)   | <b>Not reported</b>                                  |
| Hidding (1994) [The Netherlands] <sup>203</sup> | RCT          | Modified New York criteria<br>Exclusions: unable to engage in physical activity, total hip replacement, pregnancy, resting diastolic blood pressure >100mmhg, history of ischemic event, angina pectoris, heart failure, severe lung disease, diabetes, renal failure, chronic liver disease, malignancy, recent major surgery, mental retardation, serious emotional disorders                                                                                                                                                                              | The intervention group from Hidding et al (1993) <sup>204</sup> were randomised to:<br>1) Group therapy once a week, 1 hour physical training, 1 hour sports, 1 hour hydrotherapy<br>p) Home exercises                                       | 1) 30<br>p) 34 | 1) 42.3 (9.5)<br>p) 44.3 (11.1)  | 1) 23%<br>p) 29%             | <b>Government</b> (Health Insurance Executive Board) |
| Hidding (1993) [The Netherlands] <sup>204</sup> | RCT          | Aged <75 years, live <25km from assessment centre, no physical exercise therapy in last year, modified New York criteria, ≥1 of the following in past 3 months: pain, stiffness, functional limitations<br>Exclusions: Unable to engage in physical activity, total hip replacement, pregnancy, resting diastolic blood pressure >100mmhg, history of ischemic event, angina pectoris, heart failure, severe lung disease, diabetes, renal failure, chronic liver disease, malignancy, recent major surgery, mental retardation, serious emotional disorders | All patients received supervised individualised physical therapy<br>1) Received additional group physical therapy once a week<br>p) Waitlist control                                                                                         | 1) 68<br>p) 76 | 1) 43.7 (10.4)<br>p) 41.5 (10.3) | 1) 28%<br>p) 17%             | <b>Government</b> (Health Insurance Executive Board) |

axSpA = axial spondyloarthritis, ASAS = Assessment of Spondyloarthritis, BASDAI = Bath Ankylosing Spondylitis Disease Activity Index, DMARDs = disease modifying anti-rheumatic drugs, N = number, Pros. = prospective, RCT = randomised controlled trial, SD = standard deviation

Table – Aerobic + muscle strengthening exercises (axSpA), description of included studies

| Author (date) [country]                         | Study design    | Inclusion criteria                                                                                                                                                                                                                                                                                                                                           | Exposure detail                                                                                                                                                                                                                                                  | N              | Age years, mean (SD)                                | N (%) female               | Funders                                                                                                                    |
|-------------------------------------------------|-----------------|--------------------------------------------------------------------------------------------------------------------------------------------------------------------------------------------------------------------------------------------------------------------------------------------------------------------------------------------------------------|------------------------------------------------------------------------------------------------------------------------------------------------------------------------------------------------------------------------------------------------------------------|----------------|-----------------------------------------------------|----------------------------|----------------------------------------------------------------------------------------------------------------------------|
| Kraag (1990) [Canada] <sup>205</sup>            | RCT             | New York criteria, English language, stable steroids for past 3 months, DMARDs stable for 6 months, no surgery in next 4 months, not pregnant and using contraception<br>Exclusions: 10% loss of flexion in either hip joint, receiving contravening treatment                                                                                               | 1) Home physiotherapy – therapeutic exercise aimed at increasing strength and endurance + education about posture<br>p) Waitlist control                                                                                                                         | 1) 26<br>p) 27 | 1) 18-35: 13<br>≥36: 13<br>p) 18-35: 14<br>≥ 36: 13 | 1) 6 (23.1)<br>p) 5 (18.5) | <b>Government</b> (Health and Welfare Canada)                                                                              |
| Levitova (2016) [Czech republic] <sup>206</sup> | NRT             | Modified New York criteria, stable treatment for 6 months, no steroids during study                                                                                                                                                                                                                                                                          | 1) Outpatient group physiotherapy 2x per week + home exercises – spinal exercises, posture correction, muscle stretching, Pilates<br>p) Non-exercise control matched for age and sex                                                                             | 1) 22<br>p) 14 | 1) 36.9 (1.2)<br>p) 36.7 (2.8)                      | 1) 18.2%<br>p) 21.4%       | <b>Government</b> (Ministry of Health Czech Republic)                                                                      |
| Aytekin (2012) [Turkey] <sup>207</sup>          | NRT             | Modified New York criteria<br>Exclusions: presences of prosthesis, hypertension, cardiovascular disease, chronic obstructive pulmonary disease, posteroanterior chest X-ray abnormalities                                                                                                                                                                    | Home-based exercise regime including range of motion exercises, stretching, strengthening, posture and respiratory exercises – demonstrated by physiotherapist<br>1) Those who performed exercises ≥5x per week<br>p) Those who performed exercises <5x per week | 1) 34<br>p) 32 | 1) 34.4 (9.5)<br>p) 35.8 (6.7)                      | 1) 9 (26.5)<br>p) 5 (15.6) | <b>Not reported</b> – authors declared no conflict of interest                                                             |
| Viitanen (2001) [Finland] <sup>208</sup>        | NRT             | ACR SPA criteria                                                                                                                                                                                                                                                                                                                                             | 3 weeks of intensive physiotherapy and exercise – swimming, group gym.<br>1) Control                                                                                                                                                                             | 1) 25<br>p) 18 | 1) 48 (9)<br>p) 18                                  | Not reported               | <b>Not reported</b>                                                                                                        |
| Lubrano (2007) [Italy] <sup>209</sup>           | Single arm int. | Modified New York criteria<br>Exclusions: Complete ankylosing of the spine, previous admission for inpatients physiotherapy within 12 months, previous use of TNFi, use of DMARDs other than sulfasalazine or methotrexate within past 4 weeks, usage of >10mg prednisolone daily, variation of dosage of NSAIDs or prednisolone within 2 weeks of enrolment | Sessions supervised by physiotherapist – (i) warm-up followed by 30 mins strengthening, (ii) stretching exercises, (iii) endurance exercises, (iv) respiratory exercises                                                                                         | 52             | 45.7 (10.0)                                         | 13 (25.0)                  | <b>Not reported</b> – authors declared no conflict of interest                                                             |
| Band (1997) [UK] <sup>210</sup>                 | Single arm int. | Patients whose deterioration in clinical status is such that the patient would benefit from intensive inpatient treatment                                                                                                                                                                                                                                    | Aims of intensive program: improve mobility, cardiorespiratory fitness, postural awareness, muscle strength, reduce pain and stiffness, increase understanding of disease, provide benefit of group setting                                                      | 236            | 46.0 (10.9)                                         | 46 (19.5)                  | <b>Charity</b> (Arthritis and Rheumatism Council, National Ankylosing Spondylitis Society, Coates Trust, Pilkington Trust) |
| Viitanen (1995) [Finland] <sup>211</sup>        | Single arm int. | Modified New York criteria<br>Exclusions: history of psoriasis, chronic intestinal disorder (e.g. Crohn's disease or colitis ulcerosa), reactive arthritis of juvenile onset                                                                                                                                                                                 | Individual intensive program, pool exercise and group exercise – gym jogging, walking, heat and cold treatments, electrotherapy, massage                                                                                                                         | 141            | Men: 44.9 (8.9)<br>Women: 44.8 (9.7)                | 39 (27.7)                  | <b>Charity</b> (Sakari Sohlberg Foundation)                                                                                |

axSpA = axial spondyloarthritis, DMARDs = disease modifying anti-rheumatic drugs, N = number, NRT = non-randomised trial, Pros. = prospective, RCT = randomised controlled trial, SD = standard deviation, SPA = spondyloarthritis, UK = United Kingdom



Table – Aerobic + muscle strengthening exercises (axSpA), description of included studies

| Author (date)<br>[country]                  | Study design       | Inclusion criteria                                                                                                                                                                                                                                                                                                                             | Exposure detail                                                                                                                                                       | N   | Age years,<br>mean (SD) | N (%) female | Funders                                                  |
|---------------------------------------------|--------------------|------------------------------------------------------------------------------------------------------------------------------------------------------------------------------------------------------------------------------------------------------------------------------------------------------------------------------------------------|-----------------------------------------------------------------------------------------------------------------------------------------------------------------------|-----|-------------------------|--------------|----------------------------------------------------------|
| Kraag (1994)<br>[Canada] <sup>212</sup>     | Single arm<br>int. | New York criteria, English language, stable steroids for past 3 months, DMARDs stable for 6 months, no surgery in next 4 months, not pregnant and using contraception<br>Exclusions: 10% loss of flexion in either hip joint, receiving contravening treatment                                                                                 | Same intervention as Kraag (1990) <sup>205</sup> – original intervention group were followed up and provided support as needed, control group were given intervention | 46  | not reported            | not reported | <b>Not reported</b>                                      |
| Viitanen (1992)<br>[Finland] <sup>213</sup> | Single arm<br>int. | New York criteria<br>Exclusions: Another disease, active peripheral arthritis                                                                                                                                                                                                                                                                  | Inpatient physiotherapy course                                                                                                                                        | 505 | 43.0 (9.6)              | 143 (28.3)   | <b>Charity</b> (Paivikki and Sakari Sohlberg Foundation) |
| Escalas (2016)<br>[France] <sup>214</sup>   | Pros.<br>cohort    | Inflammatory back pain, aged >18 & <50 years, symptom duration >3 months & <3 years, met Calin or Berlin criteria<br>Exclusions: Definite diagnosis of non-spondyloarthritis back pain, conditions that might interfere with validity of informed consent and prevent compliance (e.g. alcoholism, history of psychiatric disorders), TNFi use | Self-reported number of physiotherapy sessions. Early physio defined as ≥8 sessions in first 6 months.                                                                | 689 | 33.3 (8.6)              | 371 (53.8)   | <b>Industry</b> (Pfizer)                                 |

axSpA = axial spondyloarthritis, DMARDs = disease modifying anti-rheumatic drugs, N = number, Pros. = prospective, SD = standard deviation, TNFi = Tumour Necrosis Factor Inhibitors

## Supplementary table 65 – Results from reviews and interventional studies of aerobic + muscle strengthening exercise in axSpA

Table – Aerobic + muscle strengthening exercises (axSpA), results and quality assessment

| Outcome (outcome measure)                     | Study (date) [study type]                       | Standardised result, SMD (95% CI) unless otherwise stated                                                                                   | Natural result                                                                                                                                                     | AMSTAR2 quality  | Rand. Seq. | Alloc. Conc. | Blind. Part. | Blind. Asses. |
|-----------------------------------------------|-------------------------------------------------|---------------------------------------------------------------------------------------------------------------------------------------------|--------------------------------------------------------------------------------------------------------------------------------------------------------------------|------------------|------------|--------------|--------------|---------------|
| Pain                                          | Millner (2016) [MA] <sup>191</sup>              | <u>Exercise vs control</u><br>SMD -0.42 (-0.74, -0.09)                                                                                      |                                                                                                                                                                    | Low              |            |              |              |               |
|                                               | Liang (2015) [MA] <sup>192</sup>                | <u>Exercise vs control</u><br>SMD -0.22 (-0.49, 0.06)                                                                                       |                                                                                                                                                                    | Moderate         |            |              |              |               |
|                                               | Sharan (2017) [SR] <sup>195</sup>               |                                                                                                                                             | Relatively few studies reported improvements in pain                                                                                                               | Critically low § |            |              |              |               |
|                                               | O'Dwyer (2014) [SR] <sup>180</sup>              |                                                                                                                                             | Two studies reported significantly lower pain compared to controls                                                                                                 | Moderate         |            |              |              |               |
|                                               | Rosu (2014) [RCT] <sup>199</sup>                | <u>Pilates + extra exercises vs Pilates only at 48 weeks</u><br>SMD -0.90 (-1.32, -0.48)                                                    | <u>Pain VAS, BL / 48 weeks, mean (SD)</u><br>Pilates + extra exercises: 36.46 (10.42) / 13.54 (7.85)<br>Pilates only: 34.79 (12.03) / 21.04 (8.81)                 |                  | H/UC       | H/UC         | H/UC         | H/UC          |
|                                               | Analay (2003) [RCT] <sup>202</sup>              | <u>Group vs home exercise</u><br>SMD 0.07 (-0.52, 0.66)                                                                                     | <u>Rest pain, BL / 6 weeks / 3 months, mean (SD)</u><br>Group exercise: 3.82 (3.4) / 3.3 (2.3) / 3.43 (2.5)<br>Home exercise: 3.13 (2.6) / 3.09 (3.6) / 3.18 (3.1) |                  | H/UC       | L            | H/UC         | L             |
|                                               | Hidding (1994) [RCT] <sup>203</sup>             |                                                                                                                                             | <u>Pain VAS, change BL-9 months, mean</u><br>Exercise: -0.1<br>Control: -0.4                                                                                       |                  | H/UC       | H/UC         | H/UC         | L             |
|                                               | Hidding (1993) [RCT] <sup>204</sup>             |                                                                                                                                             | <u>Pain VAS, change BL-9 months, mean</u><br>Exercise: 0.7<br>Control: 0.2<br>Mean difference in change: -0.43 (95% CI -1.24, 0.38)                                |                  | H/UC       | H/UC         | H/UC         | L             |
|                                               | Kraag (1990) [RCT] <sup>205</sup>               | <u>Exercise vs control, change BL-4 months</u><br>SMD 0.39 (-1.50, 0.94)                                                                    | <u>Pain, Change BL-4 months, mean (SD)</u><br>Exercise: 5.2 (26.3)<br>Control: -5.2 (26.7)                                                                         |                  | H/UC       | H/UC         | H/UC         | H/UC          |
|                                               | Aytekin (2012) [NRT] <sup>207</sup>             | <u>Exercise ≥5x per week vs exercise &lt;5x per week at 3 months</u><br>SMD 0.10 (-0.38, 0.58)                                              | <u>Pain VAS, BL / 3 months</u><br>Exercise ≥5x per week: 5.1 (2.1) / 4.1 (2.0)<br>Exercise <5x per week: 3.9 (2.3) / 3.9 (2.0)                                     |                  |            |              |              |               |
|                                               | Lubrano (2007) [Single arm int.] <sup>209</sup> |                                                                                                                                             | <u>Pain VAS, BL / 12 weeks, mean (SD)</u><br>76.6 (5.0) / 66.3 (6.3)                                                                                               |                  |            |              |              |               |
| Kraag (1994) [Single arm int.] <sup>212</sup> |                                                 | <u>Pain, 4 months / 8 months</u><br>Original exercise group: 27.9 (21.6) / 25.1 (21.1)<br>Original control group: 42.8 (25.8) / 42.2 (32.2) |                                                                                                                                                                    |                  |            |              |              |               |

Alloc. Conc. = allocation concealment, AMSTAR2 = Assessing the Methodological Quality of Systematic Reviews, axSpA = axial spondyloarthritis, BL = baseline, Blind. Asses. = Blinded assessors, Blind. Part. = blinded participants, CI = confidence interval, H/UC = high / unclear risk of bias, L = low risk of bias, MD = mean difference, NRT = non-randomised trial, Rand. Seq. = random sequence generation, RCT = randomised controlled trial, SD = standard deviation, SMD = standardised mean difference, VAS = visual analogue scale

Table – Aerobic + muscle strengthening exercises (axSpA), results and quality assessment

| Outcome (outcome measure) | Study (date) [study type]             | Standardised result, SMD (95% CI) unless otherwise stated                                                             | Natural result                                                                                                                                | AMSTAR2 quality | Rand. Seq. | Alloc. Conc. | Blind. Part. | Blind. Asses. |
|---------------------------|---------------------------------------|-----------------------------------------------------------------------------------------------------------------------|-----------------------------------------------------------------------------------------------------------------------------------------------|-----------------|------------|--------------|--------------|---------------|
| Function                  | Pecourneau (2018) [MA] <sup>189</sup> | <u>Exercise vs control [BASFI]</u><br>All: SMD -0.72 (-1.03, -0.40)<br>Patients taking TNFi: SMD -0.81 (-1.25, -0.38) |                                                                                                                                               | Moderate        |            |              |              |               |
|                           | Chang (2016) [MA] <sup>190</sup>      | <u>Specific exercise regimes vs standard exercise</u><br>SMD -0.39 (-0.58, -0.18)                                     |                                                                                                                                               | Low             |            |              |              |               |
|                           | Millner (2016) [MA] <sup>191</sup>    | <u>Exercise vs control</u><br>SMD -0.51 (-0.81, -0.21)                                                                |                                                                                                                                               | Low             |            |              |              |               |
|                           | Liang (2015) [MA] <sup>192</sup>      |                                                                                                                       | <u>BASFI, mean difference</u><br>MD -0.39 (-0.57, -0.20)                                                                                      | Moderate        |            |              |              |               |
|                           | Liang (2015) [MA] <sup>193</sup>      |                                                                                                                       | <u>BASFI, mean difference</u><br>MD -0.31 (-0.76, 0.15)                                                                                       | Moderate        |            |              |              |               |
|                           | Martins (2014) [MA] <sup>194</sup>    | <u>Exercise vs normal physical activity</u><br>SMD -0.44 (-0.79, -0.09)                                               |                                                                                                                                               | Moderate        |            |              |              |               |
|                           | Regel (2017) [SR] <sup>179</sup>      |                                                                                                                       | One study <sup>200</sup> reported a moderate difference between the groups                                                                    | Moderate        |            |              |              |               |
|                           | O'Dwyer (2014) [SR] <sup>180</sup>    |                                                                                                                       | 3 out of 7 studies favoured exercise over control for improving function                                                                      | Moderate        |            |              |              |               |
|                           | Sveaas (2019) [RCT] <sup>196</sup>    | <u>Exercise vs control at 3 months</u><br>SMD -0.81 (-1.22, -0.40)                                                    | <u>BASFI, BL / 3 months, mean (SD)</u><br>Exercise: 2.9 (1.8) / 1.8 (1.4)<br>Control: 3.6 (2.1) / 3.2 (2.0)                                   |                 | L          | L            | H/UC         | L             |
|                           | Aydin (2016) [RCT] <sup>198</sup>     | <u>Home vs hospital based exercise at 8 weeks</u><br>SMD 0.48 (-0.18, 1.13)                                           | <u>BASFI, BL / 8 weeks, mean (SD)</u><br>Home based exercise: 3.64 (2.87) / 3.78 (2.67)<br>Hospital based exercise: 3.16 (2.43) / 2.63 (2.07) |                 | L          | H/UC         | H/UC         | H/UC          |
|                           | Rosu (2014) [RCT] <sup>199</sup>      | <u>Pilates + extra exercises vs Pilates only at 48 weeks</u><br>SMD -0.93 (-1.35, -0.51)                              | <u>BASFI, BL / 48 weeks, mean (SD)</u><br>Pilates + extra exercises: 3.56 (1.83) / 1.50 (1.11)<br>Pilates only: 3.42 (1.94) / 2.76 (1.56)     |                 | H/UC       | H/UC         | H/UC         | H/UC          |
|                           | Sveaas (2014) [RCT] <sup>200</sup>    | <u>Exercise vs control at 3 months</u><br>SMD -1.11 (-1.99, -0.24)                                                    | <u>BASFI, BL / 3 months, mean (SD)</u><br>Exercise: 2.6 (2.2) / 1.5 (1.5)<br>Control: 3.1 (1.6) / 3.1 (1.4)                                   |                 | L          | L            | H/UC         | L             |

Alloc. Conc. = allocation concealment, AMSTAR2 = Assessing the Methodological Quality of Systematic Reviews, axSpA = axial spondyloarthritis, BASFI = Bath Ankylosing Spondylitis Functional Index, BL = baseline, Blind. Asses. = Blinded assessors, Blind. Part. = blinded participants, CI = confidence interval, H/UC = high / unclear risk of bias, HAQ-S = Health Assessment Questionnaire for the Spondyloarthropaties, L = low risk of bias, MA = meta-analysis, MD = mean difference, Rand. Seq. = random sequence generation, RCT = randomised controlled trial, SD = standard deviation, SMD = standardised mean difference

Table – Aerobic + muscle strengthening exercises (axSpA), results and quality assessment

| Outcome (outcome measure) | Study (date) [study type]                                  | Standardised result, SMD (95% CI) unless otherwise stated                    | Natural result                                                                                                                                                                  | AMSTAR2 quality | Rand. Seq. | Alloc. Conc. | Blind. Part. | Blind. Asses. |
|---------------------------|------------------------------------------------------------|------------------------------------------------------------------------------|---------------------------------------------------------------------------------------------------------------------------------------------------------------------------------|-----------------|------------|--------------|--------------|---------------|
| Function                  | Kjeken (2013) [RCT] <sup>201</sup>                         | <u>Exercise vs control at 12 months</u><br>SMD -0.03 (-0.44, 0.37)           | <u>BASFI, BL / 12 months, mean (SD †)</u><br>Exercise: 38.6 (17.5) / 38.0 (19.0)<br>Control: 42.4 (20.0) / 38.6 (18.2)                                                          |                 | L          | L            | H/UC         | L             |
|                           | Analay (2003) [RCT] <sup>202</sup>                         | <u>Group vs home exercise</u><br>SMD -0.39 (-0.98, 0.20)                     | <u>BASFI, BL / 6 weeks / 3 months, mean (SD)</u><br>Group exercise: 26.34 (20.10) / 20.0 (16.76) / 22.0 (17.15)<br>Home exercise: 27.59 (17.82) / 27.31 (20.42) / 26.13 (17.20) |                 | H/UC       | L            | H/UC         | L             |
|                           | Hidding (1994) [RCT] <sup>203</sup>                        |                                                                              | <u>HAQ-S, change BL-9 months, mean</u><br>Exercise: 0.01<br>Control: -0.08                                                                                                      |                 | H/UC       | H/UC         | H/UC         | L             |
|                           | Hidding (1993) [RCT] <sup>204</sup>                        |                                                                              | <u>HAQ-S, change BL-9 months, mean</u><br>Exercise: -0.02<br>Control: 0.03<br>Mean difference in change: 0.05 (95% CI 0.0, 0.11)                                                |                 | H/UC       | H/UC         | H/UC         | L             |
|                           | Kraag (1990) [RCT] <sup>205</sup>                          | <u>Exercise vs control, change BL-4 months</u><br>SMD 1.68 (1.05, 2.31)      | <u>Toronto Activities of Daily Living, Change BL-4 months, mean (SD)</u><br>Exercise: 3.92 (2.94)<br>Control: -0.19 (1.86)                                                      |                 | H/UC       | H/UC         | H/UC         | H/UC          |
|                           | Bespoke meta-analysis including <sup>196;200;201;205</sup> | <u>Exercise vs control</u><br>SMD -0.87 (-1.58, -0.16), I <sup>2</sup> 85.7% |                                                                                                                                                                                 |                 |            |              |              |               |

† Mean (SD) estimated from median (range) using published formula<sup>87</sup>

Alloc. Conc. = allocation concealment, AMSTAR2 = Assessing the Methodological Quality of Systematic Reviews, axSpA = axial spondyloarthritis, BASFI = Bath Ankylosing Spondylitis Functional Index, BL = baseline, Blind. Asses. = Blinded assessors, Blind. Part. = blinded participants, CI = confidence interval, H/UC = high / unclear risk of bias, HAQ-S = Health Assessment Questionnaire for the Spondyloarthropathies, L = low risk of bias, NRT = non-randomised trial, Rand. Seq. = random sequence generation, RCT = randomised controlled trial, SD = standard deviation, SMD = standardised mean difference

Table – Aerobic + muscle strengthening exercises (axSpA), results and quality assessment

| Outcome (outcome measure) | Study (date) [study type]                       | Standardised result, SMD (95% CI) unless otherwise stated                                       | Natural result                                                                                                                                                                                                                                                                                                      | AMSTAR2 quality | Rand. Seq. | Alloc. Conc. | Blind. Part. | Blind. Asses. |
|---------------------------|-------------------------------------------------|-------------------------------------------------------------------------------------------------|---------------------------------------------------------------------------------------------------------------------------------------------------------------------------------------------------------------------------------------------------------------------------------------------------------------------|-----------------|------------|--------------|--------------|---------------|
| Function                  | Levitova (2016) [NRT] <sup>206</sup>            |                                                                                                 | <u>BASFI, Change BL-6 months, mean (SD)</u><br>Exercise: 0.92 (0.17) / 0.93 (0.18)<br>Control: not reported                                                                                                                                                                                                         |                 |            |              |              |               |
|                           | Aytekin (2012) [NRT] <sup>207</sup>             | <u>Exercise ≥5x per week vs exercise &lt;5x per week at 3 months</u><br>SMD -0.43 (-0.92, 0.06) | <u>BASFI, BL / 3 months</u><br>Exercise ≥5x per week: 2.54 (2.26) / 2.05 (2.14)<br>Exercise <5x per week: 2.90 (2.30) / 2.99 (2.26)                                                                                                                                                                                 |                 |            |              |              |               |
|                           | Viitanen (2001) [NRT] <sup>208</sup>            |                                                                                                 | <u>BASFI, change BL – 3 weeks, mean (SD ‡)</u><br>Exercise: -0.5 (1.5)<br>Control: 0.5 (1.2)<br><u>Dougados function index, change BL – 3 weeks, mean (SD ‡)</u><br>Exercise: -0.4 (4.6)<br>Control: 0.0 (1.5)<br><u>HAQ-S, change BL – 3 weeks, mean (SD ‡)</u><br>Exercise: -0.17 (0.92)<br>Control: -0.06 (0.22) |                 |            |              |              |               |
|                           | Lubrano (2007) [Single arm int.] <sup>209</sup> |                                                                                                 | <u>BASFI, BL / 12 weeks, mean (SD)</u><br>67.1 (7.9) / 57.9 (7.2)                                                                                                                                                                                                                                                   |                 |            |              |              |               |
|                           | Kraag (1994) [Single arm int.] <sup>212</sup>   |                                                                                                 | <u>Toronto Activities of Daily Living, 4 months / 8 months</u><br>Original exercise group: 19.9 (3.9) / 2.3 (4.2)<br>Original control group: 16.6 (2.8) / 0.8 (2.4)                                                                                                                                                 |                 |            |              |              |               |
|                           | Band (1997) [Single arm int.] <sup>210</sup>    |                                                                                                 | <u>BASFI, mean change BL-2 weeks</u><br>-1.27                                                                                                                                                                                                                                                                       |                 |            |              |              |               |

‡ SD calculated from 95% CI in paper

Alloc. Conc. = allocation concealment, AMSTAR2 = Assessing the Methodological Quality of Systematic Reviews, axSpA = axial spondyloarthritis, BASFI = Bath Ankylosing Spondylitis Functional Index, BL = baseline, Blind. Asses. = Blinded assessors, Blind. Part. = blinded participants, CI = confidence interval, H/UC = high / unclear risk of bias, HAQ-S = Health Assessment Questionnaire for the Spondyloarthropaties, L = low risk of bias, NRT = non-randomised trial, Rand. Seq. = random sequence generation, SD = standard deviation, SMD = standardised mean difference

Table – Aerobic + muscle strengthening exercises (axSpA), results and quality assessment

| Outcome (outcome measure) | Study (date) [study type]             | Standardised result, SMD (95% CI) unless otherwise stated                                                              | Natural result                                                                                                                                                                                                              | AMSTAR2 quality | Rand. Seq. | Alloc. Conc. | Blind. Part. | Blind. Asses. |
|---------------------------|---------------------------------------|------------------------------------------------------------------------------------------------------------------------|-----------------------------------------------------------------------------------------------------------------------------------------------------------------------------------------------------------------------------|-----------------|------------|--------------|--------------|---------------|
| Disease activity          | Pecourneau (2018) [MA] <sup>189</sup> | <u>Exercise vs control [BASDAI]</u><br>All: SMD -0.90 (-1.52, -0.27)<br>Patients taking TNFi: SMD -1.37 (-1.90, -0.84) |                                                                                                                                                                                                                             | Moderate        |            |              |              |               |
|                           | Chang (2016) [MA] <sup>190</sup>      | <u>Specific exercise regimes vs standard exercise</u><br>SMD -0.41 (-0.86, 0.05)                                       |                                                                                                                                                                                                                             | Low             |            |              |              |               |
|                           | Millner (2016) [MA] <sup>191</sup>    | <u>Exercise vs control</u><br>SMD -0.47 (-0.84, -0.09)                                                                 |                                                                                                                                                                                                                             | Low             |            |              |              |               |
|                           | Liang (2015) [MA] <sup>192</sup>      |                                                                                                                        | <u>BASDAI, mean difference</u><br>MD -0.50 (-0.99, -0.02)                                                                                                                                                                   | Moderate        |            |              |              |               |
|                           | Liang (2015) [MA] <sup>193</sup>      |                                                                                                                        | <u>BASDAI, mean difference</u><br>MD -0.58 (-1.10, -0.06)                                                                                                                                                                   | Moderate        |            |              |              |               |
|                           | Martins (2014) [MA] <sup>194</sup>    | <u>Exercise vs normal physical activity</u><br>SMD -0.58 (-0.94, -0.22)                                                |                                                                                                                                                                                                                             | Moderate        |            |              |              |               |
|                           | Regel (2017) [SR] <sup>179</sup>      |                                                                                                                        | One study <sup>200</sup> reported a large difference between the groups                                                                                                                                                     | Moderate        |            |              |              |               |
|                           | O'Dwyer (2014) [SR] <sup>180</sup>    |                                                                                                                        | 2 out of 5 studies favoured exercise over control for improving disease activity measured using BASDAI                                                                                                                      | Moderate        |            |              |              |               |
|                           | Sveaas (2019) [RCT] <sup>196</sup>    | <u>Exercise vs control at 3 months</u><br>ASDAS: SMD -1.00 (-1.42, -0.58)<br>BASDAI: SMD -0.97 (-1.38, -0.55)          | <u>ASDAS, BL / 3 months, mean (SD)</u><br>Exercise: 2.6 (0.8) / 1.9 (0.7)<br>Control: 2.7 (0.6) / 2.6 (0.7)<br><u>BASDAI, BL / 3 months, mean (SD)</u><br>Exercise: 4.9 (1.6) / 3.3 (1.6)<br>Control: 5.3 (1.5) / 4.8 (1.5) |                 | L          | L            | H/UC         | L             |
|                           | Aydin (2016) [RCT] <sup>198</sup>     | <u>Home vs hospital based exercise at 8 weeks</u><br>SMD 0.52 (-0.14, 1.17)                                            | <u>BASDAI, BL / 8 weeks, mean (SD)</u><br>Home based exercise: 5.02 (2.43) / 4.66 (2.02)<br>Hospital based exercise: 4.15 (1.79) / 3.66 (1.84)                                                                              |                 | L          | H/UC         | H/UC         | H/UC          |

Alloc. Conc. = allocation concealment, AMSTAR2 = Assessing the Methodological Quality of Systematic Reviews, axSpA = axial spondyloarthritis, ASDAS = Ankylosing Spondylitis Disease Activity Score, BASDAI = Bath Ankylosing Spondylitis Disease Activity Index, BL = baseline, Blind. Asses. = Blinded assessors, Blind. Part. = blinded participants, CI = confidence interval, H/UC = high / unclear risk of bias, L = low risk of bias, MD = mean difference, Rand. Seq. = random sequence generation, RCT = randomised controlled trial, SD = standard deviation, SMD = standardised mean difference

Table – Aerobic + muscle strengthening exercises (axSpA), results and quality assessment

| Outcome (outcome measure) | Study (date) [study type]                              | Standardised result, SMD (95% CI) unless otherwise stated                                                         | Natural result                                                                                                                                                                                                              | AMSTAR2 quality | Rand. Seq. | Alloc. Conc. | Blind. Part. | Blind. Asses. |
|---------------------------|--------------------------------------------------------|-------------------------------------------------------------------------------------------------------------------|-----------------------------------------------------------------------------------------------------------------------------------------------------------------------------------------------------------------------------|-----------------|------------|--------------|--------------|---------------|
| Disease activity          | Rosu (2014) [RCT] <sup>199</sup>                       | <u>Pilates + extra exercises vs Pilates only at 48 weeks</u><br>SMD -1.55 (-2.01, -1.09)                          | <u>BASDAI, BL / 48 weeks, mean (SD)</u><br>Pilates + extra exercises: 5.41 (1.95) / 2.10 (0.82)<br>Pilates only: 5.29 (1.96) / 4.13 (1.66)                                                                                  |                 | H/UC       | H/UC         | H/UC         | H/UC          |
|                           | Sveaas (2014) [RCT] <sup>200</sup>                     | <u>Exercise vs control at 3 months</u><br>ASDAS: SMD -0.95 (-1.81, -0.09)<br>BASDAI: SMD -0.45 (-1.27, 0.37)      | <u>ASDAS, BL / 3 months, mean (SD)</u><br>Exercise: 2.3 (0.6) / 1.8 (0.9)<br>Control: 2.7 (0.8) / 2.6 (0.8)<br><u>BASDAI, BL / 3 months, mean (SD)</u><br>Exercise: 5.3 (1.4) / 3.3 (2.0)<br>Control: 5.3 (1.3) / 4.2 (2.0) |                 | L          | L            | H/UC         | L             |
|                           | Kjeken (2013) [RCT] <sup>201</sup>                     | <u>Exercise vs control at 12 months</u><br>SMD -0.21 (-0.62, 0.19)                                                | <u>BASDAI, BL / 12 months, mean (SD †)</u><br>Exercise: 57.8 (10.6) / 49.6 (22.8)<br>Control: 56.9 (12.5) / 54.5 (22.9)                                                                                                     |                 | L          | L            | H/UC         | L             |
|                           | Bespoke meta-analysis including <sup>196;200;201</sup> | <u>Exercise vs control</u><br>SMD -0.56 (-1.09, -0.02), I <sup>2</sup> 69.6%                                      |                                                                                                                                                                                                                             |                 |            |              |              |               |
|                           | Levitova (2016) [NRT] <sup>206</sup>                   | <u>Exercise vs control, change BL-6 months</u><br>ASDAS SMD -0.16 (-0.83, 0.51)<br>BASDAI SMD -0.34 (-1.02, 0.34) | <u>ASDAS, Change BL-6 months, mean (SD)</u><br>Exercise: -0.24 (0.68)<br>Control: -0.13 (0.72)<br><u>BASDAI, Change BL-6 months, mean (SD)</u><br>Exercise: -0.32 (1.34)<br>Control: 0.12 (1.22)                            |                 |            |              |              |               |
|                           | Aytekin (2012) [NRT] <sup>207</sup>                    | <u>Exercise ≥5x per week vs exercise &lt;5x per week at 3 months</u><br>SMD -0.14 (-0.63, 0.34)                   | <u>BASDAI, BL / 3 months</u><br>Exercise ≥5x per week: 4.44 (2.07) / 3.77 (1.98)<br>Exercise <5x per week: 3.98 (2.19) / 4.07 (2.21)                                                                                        |                 |            |              |              |               |
|                           | Viitanen (2001) [NRT] <sup>208</sup>                   |                                                                                                                   | <u>BASDAI, change BL – 3 weeks, mean (SD ‡)</u><br>Exercise: 4 (17.9)<br>Control: 5 (11.9)                                                                                                                                  |                 |            |              |              |               |
|                           | Lubrano (2007) [Single arm int.] <sup>209</sup>        |                                                                                                                   | <u>BASDAI, BL / 12 weeks, mean (SD)</u><br>65.9 (5.3) / 56.4 (5.9)                                                                                                                                                          |                 |            |              |              |               |
|                           | Band (1997) [Single arm int.] <sup>210</sup>           |                                                                                                                   | <u>BASDAI, mean change BL-2 weeks</u><br>-0.84                                                                                                                                                                              |                 |            |              |              |               |

† Mean (SD) estimated from median (range) using published formula<sup>87</sup>

‡ SD calculated from 95% CI in paper

Alloc. Conc. = allocation concealment, AMSTAR2 = Assessing the Methodological Quality of Systematic Reviews, axSpA = axial spondyloarthritis, ASDAS = Ankylosing Spondylitis Disease Activity Score, BASDAI = Bath Ankylosing Spondylitis Disease Activity Index, BL = baseline, Blind. Asses. = Blinded assessors, Blind. Part. = blinded participants, CI = confidence interval, H/UC = high / unclear risk of bias, L = low risk of bias, MD = mean difference, NRT = non-randomised trial, Rand. Seq. = random sequence generation, RCT = randomised controlled trial, SD = standard deviation, SMD = standardised mean difference

Table – Aerobic + muscle strengthening exercises (axSpA), results and quality assessment

| Outcome (outcome measure)                    | Study (date) [study type]                          | Standardised result, SMD (95% CI) unless otherwise stated                                                                                    | Natural result                                                                                                                                | AMSTAR2 quality | Rand. Seq. | Alloc. Conc. | Blind. Part. | Blind. Asses. |
|----------------------------------------------|----------------------------------------------------|----------------------------------------------------------------------------------------------------------------------------------------------|-----------------------------------------------------------------------------------------------------------------------------------------------|-----------------|------------|--------------|--------------|---------------|
| Spinal mobility                              | Chang (2016) [MA] <sup>190</sup>                   | <u>Specific exercise regimes vs standard exercise</u><br>SMD -0.48 (-1.61, 0.64)                                                             |                                                                                                                                               | Low             |            |              |              |               |
|                                              | Liang (2015) [MA] <sup>193</sup>                   |                                                                                                                                              | <u>BASMI, mean difference</u><br>MD -0.99 (-1.61, -0.38)                                                                                      | Moderate        |            |              |              |               |
|                                              | Martins (2014) [MA] <sup>194</sup>                 |                                                                                                                                              | <u>Exercise vs normal physical activity</u><br>MD -0.51 (-0.95, -0.08)                                                                        | Moderate        |            |              |              |               |
|                                              | Regel (2017) [SR] <sup>179</sup>                   |                                                                                                                                              | One study <sup>200</sup> reported a no difference between the groups                                                                          | Moderate        |            |              |              |               |
|                                              | O'Dwyer (2014) [SR] <sup>180</sup>                 |                                                                                                                                              | BASMI scores were lower after rehabilitation programmes but not Pilates                                                                       | Moderate        |            |              |              |               |
|                                              | Sveaas (2019) [RCT] <sup>196</sup>                 | <u>Exercise vs control at 3 months</u><br>SMD 0.00 (-0.39, 0.39)<br>[Significant difference after adjusting for centre] and baseline values] | <u>BASMI, BL / 3 months, mean (SD)</u><br>Exercise: 2.9 (1.3) / 2.5 (1.2)<br>Control: 2.6 (1.3) / 2.5 (1.4)                                   |                 | L          | L            | H/UC         | L             |
|                                              | Aydin (2016) [RCT] <sup>198</sup>                  | <u>Home vs hospital based exercise at 8 weeks</u><br>SMD 0.57 (-0.09, 1.23)                                                                  | <u>BASMI, BL / 8 weeks, mean (SD)</u><br>Home based exercise: 2.42 (1.50) / 2.52 (1.34)<br>Hospital based exercise: 2.38 (1.19) / 1.83 (1.04) |                 | L          | H/UC         | H/UC         | H/UC          |
|                                              | Rosu (2014) [RCT] <sup>199</sup>                   | <u>Pilates + extra exercises vs Pilates only at 48 weeks</u><br>SMD -2.73 (-3.29, -2.17)                                                     | <u>BASMI, BL / 48 weeks, mean (SD)</u><br>Pilates + extra exercises: 3.73 (0.45) / 1.19 (0.84)<br>Pilates only: 3.3 (0.45) / 3.02 (0.44)      |                 | H/UC       | H/UC         | H/UC         | H/UC          |
|                                              | Sveaas (2014) [RCT] <sup>200</sup>                 | <u>Exercise vs control at 3 months</u><br>SMD -0.52 (-1.35, 0.30)                                                                            | <u>BASMI, BL / 3 months, mean (SD)</u><br>Exercise: 2.3 (1.5) / 2.0 (1.6)<br>Control: 3.0 (1.8) / 2.9 (1.8)                                   |                 | L          | L            | H/UC         | L             |
|                                              | Bespoke meta-analysis including <sup>196;200</sup> | <u>Exercise vs control</u><br>SMD -0.13 (-0.57, 0.31), I <sup>2</sup> 20.4%                                                                  |                                                                                                                                               |                 |            |              |              |               |
|                                              | Levitova (2016) [NRT] <sup>206</sup>               |                                                                                                                                              | <u>BASMI, Change BL-6 months, mean (SD)</u><br>Exercise: 1.43 (0.24) / 0.82 (0.23)                                                            |                 |            |              |              |               |
| Band (1997) [Single arm int.] <sup>210</sup> |                                                    | <u>BASMI, mean change BL-2 weeks</u><br>-0.97                                                                                                |                                                                                                                                               |                 |            |              |              |               |

Alloc. Conc. = allocation concealment, AMSTAR2 = Assessing the Methodological Quality of Systematic Reviews, axSpA = axial spondyloarthritis, BASMI = Bath Ankylosing Spondylitis Metrology Index, BL = baseline, Blind. Asses. = Blinded assessors, Blind. Part. = blinded participants, CI = confidence interval, H/UC = high / unclear risk of bias, L = low risk of bias, MD = mean difference, NRT = non-randomised trial, Rand. Seq. = random sequence generation, RCT = randomised controlled trial, SD = standard deviation, SMD = standardised mean difference



Table – Aerobic + muscle strengthening exercises (axSpA), results and quality assessment

| Outcome (outcome measure) | Study (date) [study type]            | Standardised result, SMD (95% CI) unless otherwise stated                                      | Natural result                                                                                                                                                                             | AMSTAR2 quality | Rand. Seq. | Alloc. Conc. | Blind. Part. | Blind. Asses. |
|---------------------------|--------------------------------------|------------------------------------------------------------------------------------------------|--------------------------------------------------------------------------------------------------------------------------------------------------------------------------------------------|-----------------|------------|--------------|--------------|---------------|
| Stiffness                 | O'Dwyer (2014) [SR] <sup>180</sup>   |                                                                                                | Two studies reported significantly lower stiffness compared to controls                                                                                                                    | Moderate        |            |              |              |               |
|                           | Analay (2003) [RCT] <sup>202</sup>   | <u>Group vs home exercise</u><br>SMD -0.33 (-0.92, 0.26)                                       | <u>Morning stiffness, BL / 6 weeks / 3 months, mean (SD)</u><br>Group exercise: 38.65 (60.32) / 20.87 (32.34) / 24.04 (36.24)<br>Home exercise: 36.59 (51.44) / 37 (62.01) / 35.54 (36.77) |                 | H/UC       | L            | H/UC         | L             |
|                           | Hidding (1994) [RCT] <sup>203</sup>  |                                                                                                | <u>Stiffness VAS, change BL-9 months, mean</u><br>Exercise: -0.6<br>Control: -0.2                                                                                                          |                 | H/UC       | H/UC         | H/UC         | L             |
|                           | Hidding (1993) [RCT] <sup>204</sup>  |                                                                                                | <u>Stiffness VAS, change BL-9 months, mean</u><br>Exercise: 0.2<br>Control: -0.1<br>Mean difference in change: -0.31 (95% CI -0.92, 0.29)                                                  |                 | H/UC       | H/UC         | H/UC         | L             |
|                           | Aytekın (2012) [NRT] <sup>207</sup>  | <u>Exercise ≥5x per week vs exercise &lt;5x per week at 3 months</u><br>SMD 0.01 (-0.47, 0.49) | <u>Morning stiffness, BL / 3 months</u><br>Exercise ≥5x per week: 55.15 (70.94) / 39.11 (65.86)<br>Exercise <5x per week: 32.66 (32.40) / 38.59 (34.43)                                    |                 |            |              |              |               |
|                           | Viitanen (2001) [NRT] <sup>208</sup> |                                                                                                | <u>Stiffness, change BL – 3 weeks, mean (SD ±)</u><br>Exercise: 0.2 (21.7)<br>Control: 6 (19.5)                                                                                            |                 |            |              |              |               |
| Joint activity            | Hidding (1994) [RCT] <sup>203</sup>  |                                                                                                | <u>Articular index, change BL-9 months, mean</u><br>Exercise: 0.1<br>Control: -1.6                                                                                                         |                 | H/UC       | H/UC         | H/UC         | L             |
|                           | Hidding (1993) [RCT] <sup>204</sup>  |                                                                                                | <u>Articular index, change BL-9 months, mean</u><br>Exercise: -0.3<br>Control: 0.3<br>Mean difference in change: 0.60 (95% CI -0.52, 1.72)                                                 |                 | H/UC       | H/UC         | H/UC         | L             |

‡ SD calculated from 95% CI in paper

Alloc. Conc. = allocation concealment, AMSTAR2 = Assessing the Methodological Quality of Systematic Reviews, axSpA = axial spondyloarthritis, BL = baseline, Blind. Asses. = Blinded assessors, Blind. Part. = blinded participants, CI = confidence interval, H/UC = high / unclear risk of bias, L = low risk of bias, NRT = non-randomised trial, Rand. Seq. = random sequence generation, RCT = randomised controlled trial, SD = standard deviation, SMD = standardised mean difference

Table – Aerobic + muscle strengthening exercises (axSpA), results and quality assessment

| Outcome (outcome measure) | Study (date) [study type]                          | Standardised result, SMD (95% CI) unless otherwise stated                                        | Natural result                                                                                                                                | AMSTAR2 quality  | Rand. Seq. | Alloc. Conc. | Blind. Part. | Blind. Asses. |
|---------------------------|----------------------------------------------------|--------------------------------------------------------------------------------------------------|-----------------------------------------------------------------------------------------------------------------------------------------------|------------------|------------|--------------|--------------|---------------|
| Patient global            | Sveaas (2019) [RCT] <sup>196</sup>                 | <u>Exercise vs control at 3 months</u><br>SMD -0.91 (-1.32, -0.50)                               | <u>Patient global, BL / 3 months, mean (SD)</u><br>Exercise: 4.7 (2.0) / 2.9 (2.3)<br>Control: 5.3 (2.0) / 4.9 (2.1)                          |                  | L          | L            | H/UC         | L             |
|                           | Aydin (2016) [RCT] <sup>198</sup>                  | <u>Home vs hospital based exercise at 8 weeks</u><br>SMD 0.18 (-0.46, 0.83)                      | <u>BAS-G, BL / 8 weeks, mean (SD)</u><br>Home based exercise: 5.10 (2.11) / 4.80 (1.67)<br>Hospital based exercise: 4.58 (1.88) / 4.45 (2.14) |                  | L          | H/UC         | H/UC         | H/UC          |
|                           | Kjeken (2013) [RCT] <sup>201</sup>                 | <u>Exercise vs control at 12 months</u><br>SMD -0.38 (-0.79, 0.03)                               | <u>BAS-G, BL / 12 months, mean (SD †)</u><br>Exercise: 56.2 (17.8) / 41.7 (23.5)<br>Control: 57.5 (18.8) / 50.5 (22.7)                        |                  | L          | L            | H/UC         | L             |
|                           | Viitanen (2001) [NRT] <sup>208</sup>               |                                                                                                  | <u>BAS-G, change BL – 3 weeks, mean (SD †)</u><br>Exercise: 1 (20.4)<br>Control: 4 (21.6)                                                     |                  |            |              |              |               |
|                           | Lubrano (2007) [Single arm int.] <sup>209</sup>    |                                                                                                  | <u>Patients global VAS, BL / 12 weeks, mean (SD)</u><br>72.1 (6.8) / 59.7 (6.6)                                                               |                  |            |              |              |               |
|                           | Band (1997) [Single arm int.] <sup>210</sup>       |                                                                                                  | <u>BAS-G, mean change BL-2 weeks</u><br>-1.38                                                                                                 |                  |            |              |              |               |
| QoL                       | O'Dwyer (2014) [SR] <sup>180</sup>                 |                                                                                                  | QoL scores were lower after rehabilitation programmes but not Pilates                                                                         | Moderate         |            |              |              |               |
|                           | Aydin (2016) [RCT] <sup>198</sup>                  | <u>Home vs hospital based exercise at 8 weeks</u><br>SMD 0.58 (-0.08, 1.23)                      | <u>ASQOL, BL / 8 weeks, mean (SD)</u><br>Home based exercise: 9.63 (5.41) / 9.00 (5.06)<br>Hospital based exercise: 7.11 (4.33) / 6.22 (4.59) |                  | L          | H/UC         | H/UC         | H/UC          |
|                           | Aytekin (2012) [NRT] <sup>207</sup>                | <u>Exercise ≥5x per week vs exercise &lt;5x per week at 3 months</u><br>SMD -0.50 (-0.99, -0.01) | <u>ASQOL, BL / 3 months</u><br>Exercise ≥5x per week: 9.56 (5.21) / 7.29 (4.6)<br>Exercise <5x per week: 9.34 (5.97) / 9.96 (6.1)             |                  |            |              |              |               |
| Fatigue                   | Sharan (2017) [SR] <sup>195</sup>                  |                                                                                                  | Relatively few studies reported improvements in pain                                                                                          | Critically low § |            |              |              |               |
|                           | Sveaas (2019) [RCT] <sup>196</sup>                 | <u>Exercise vs control at 3 months</u><br>SMD -0.80 (-1.21, -0.39)                               | <u>BASDAI question 1, BL / 3 months, mean (SD)</u><br>Exercise: 5.8 (1.8) / 3.8 (2.1)<br>Control: 6.1 (1.9) / 5.4 (1.9)                       |                  | L          | L            | H/UC         | L             |
|                           | Sveaas (2018) [Norway] <sup>197</sup>              | <u>Exercise vs control at 3 months</u><br>SMD -0.86 (-1.71, -0.01)                               | <u>BASDAI question 1, BL / 3 months, mean (SD)</u><br>Exercise: 6.8 (1.5) / 3.7 (2.2)<br>Control: 6.3 (2.1) / 5.8 (2.6)                       |                  | L          | L            | H/UC         | H/UC          |
|                           | Bespoke meta-analysis including <sup>196,197</sup> | <u>Exercise vs control</u><br>SMD -0.81 (-1.18, -0.44), I <sup>2</sup> 0%                        |                                                                                                                                               |                  |            |              |              |               |

† Mean (SD) estimated from median (range) using published formula<sup>87</sup>; ‡ SD calculated from 95% CI in paper;

Alloc. Conc. = allocation concealment, AMSTAR2 = Assessing the Methodological Quality of Systematic Reviews, ASQOL = Ankylosing Spondylitis Quality of Life, axSpA = axial spondyloarthritis, BASDAI = Bath Ankylosing Spondylitis Disease Activity Index, BAS-G = Bath Ankylosing Spondylitis Global Score, BL = baseline, Blind. Asses. = Blinded assessors, Blind. Part. = blinded participants, CI = confidence interval, H/UC = high / unclear risk of bias, L = low risk of bias, MD = mean difference, NRT = non-randomised trial, QoL = quality of life, Rand. Seq. = random sequence generation, RCT = randomised controlled trial, SD = standard deviation, SMD = standardised mean difference, VAS = visual analogue scale

Table – Aerobic + muscle strengthening exercises (axSpA), results and quality assessment

| Outcome (outcome measure) | Study (date) [study type]             | Standardised result, SMD (95% CI) unless otherwise stated                   | Natural result                                                                                                                                                      | AMSTAR2 quality  | Rand. Seq. | Alloc. Conc. | Blind. Part. | Blind. Asses. |
|---------------------------|---------------------------------------|-----------------------------------------------------------------------------|---------------------------------------------------------------------------------------------------------------------------------------------------------------------|------------------|------------|--------------|--------------|---------------|
| Emotional distress        | Sveaas (2018) [Norway] <sup>197</sup> | <u>Exercise vs control at 3 months</u><br>SMD -1.05 (-1.92, -0.18)          | <u>Emotional distress (GHQ), BL / 3 months, mean (SD)</u><br>Exercise: 20.0 (3.4) / 13.9 (6.1)<br>Control: 19.1 (3.9) / 19.1 (4.0)                                  |                  | L          | L            | H/UC         | H/UC          |
| Anxiety                   | Aydin (2016) [RCT] <sup>198</sup>     | <u>Home vs hospital based exercise at 8 weeks</u><br>SMD 0.55 (-0.11, 1.21) | <u>HADS - anxiety, BL / 8 weeks, mean (SD)</u><br>Home based exercise: 8.84 (4.08) / 8.63 (4.23)<br>Hospital based exercise: 8.22 (4.90) / 6.50 (3.45)              |                  | L          | H/UC         | H/UC         | H/UC          |
| Depression                | Liang (2015) [MA] <sup>192</sup>      |                                                                             | <u>Depression, mean difference</u><br>MD -2.31 (-3.33, -1.30)                                                                                                       | Moderate         |            |              |              |               |
|                           | Sharan (2017) [SR] <sup>195</sup>     |                                                                             | Exercise has been reported to reduce depression                                                                                                                     | Critically low § |            |              |              |               |
|                           | Aydin (2016) [RCT] <sup>198</sup>     | <u>Home vs hospital based exercise at 8 weeks</u><br>SMD 0.65 (-0.01, 1.32) | <u>HADS - depression, BL / 8 weeks, mean (SD)</u><br>Home based exercise: 9.21 (4.57) / 9.47 (5.61)<br>Hospital based exercise: 7.66 (4.25) / 6.38 (3.58)           |                  | L          | H/UC         | H/UC         | H/UC          |
|                           | Analay (2003) [RCT] <sup>202</sup>    | <u>Group vs home exercise</u><br>SMD -0.38 (-0.97, 0.21)                    | <u>BDI, BL / 6 weeks / 3 months, mean (SD)</u><br>Group exercise: 5.52 (4.56) / 3.95 (3.21) / 5.13 (6.34)<br>Home exercise: 6.31 (4.72) / 5.90 (6.62) / 6.77 (6.41) |                  | H/UC       | L            | H/UC         | L             |
| Self-efficacy             | Liang (2015) [MA] <sup>192</sup>      | <u>Exercise vs control</u><br>SMD 0.07 (-0.25, 0.38)                        |                                                                                                                                                                     | Moderate         |            |              |              |               |

Alloc. Conc. = allocation concealment, AMSTAR2 = Assessing the Methodological Quality of Systematic Reviews, axSpA = axial spondyloarthritis, BDI = Beck Depression Inventory, BL = baseline, Blind. Asses. = Blinded assessors, Blind. Part. = blinded participants, CI = confidence interval, GHQ = General Health Questionnaire, H/UC = high / unclear risk of bias, HADS = Hospital Anxiety and Depression Scale, L = low risk of bias, MD = mean difference, Rand. Seq. = random sequence generation, RCT = randomised controlled trial, SD = standard deviation, SMD = standardised mean difference

Table – Aerobic + muscle strengthening exercises (axSpA), results and quality assessment

| Outcome (outcome measure) | Study (date) [study type]                          | Standardised result, SMD (95% CI) unless otherwise stated                     | Natural result                                                                                                                                     | AMSTAR2 quality | Rand. Seq. | Alloc. Conc. | Blind. Part. | Blind. Asses. |
|---------------------------|----------------------------------------------------|-------------------------------------------------------------------------------|----------------------------------------------------------------------------------------------------------------------------------------------------|-----------------|------------|--------------|--------------|---------------|
| CRP                       | Sveaas (2019) [RCT] <sup>196</sup>                 | <u>Exercise vs control at 3 months</u><br>SMD -0.29 (-0.68, 0.11)             | <u>CRP, BL / 3 months, mean (SD †)</u><br>Exercise: 8.3 (6.0) / 4.0 (2.7)<br>Control: 8.5 (6.2) / 4.8 (2.9)                                        |                 | L          | L            | H/UC         | L             |
|                           | Aydin (2016) [RCT] <sup>198</sup>                  | <u>Home vs hospital based exercise at 8 weeks</u><br>SMD -0.48 (-1.14, 0.17)  | <u>CRP, BL / 8 weeks, mean (SD)</u><br>Home based exercise: 0.44 (0.54) / 0.32 (0.30)<br>Hospital based exercise: 1.25 (2.80) / 0.90 (1.69)        |                 | L          | H/UC         | H/UC         | H/UC          |
|                           | Sveaas (2014) [RCT] <sup>200</sup>                 | <u>Exercise vs control at 3 months</u><br>SMD -0.34 (-1.16, 0.48)             | <u>CRP, BL / 3 months, mean (SD †)</u><br>Exercise: 3.0 (2.6) / 3.8 (3.6)<br>Control: 7.0 (6.4) / 5.0 (3.5)                                        |                 | L          | L            | H/UC         | L             |
|                           | Bespoke meta-analysis including <sup>196;200</sup> | <u>Exercise vs control</u><br>SMD -0.30 (-0.65, 0.06), I <sup>2</sup> 20.4%   |                                                                                                                                                    |                 |            |              |              |               |
|                           | Levitova (2016) [NRT] <sup>206</sup>               | <u>Exercise vs control, change BL-6 months</u><br>SMD 0.21 (-0.46, 0.89)      | <u>CRP, Change BL-6 months, mean (SD)</u><br>Exercise: -1.52 (6.02)<br>Control: -2.76 (5.49)                                                       |                 |            |              |              |               |
| ESR                       | Sveaas (2019) [RCT] <sup>196</sup>                 | <u>Exercise vs control at 3 months</u><br>SMD 0.98 (0.56, 1.39)               | <u>ESR, BL / 3 months, mean (SD †)</u><br>Exercise: 21.3 (14.5) / 24.0 (17.4)<br>Control: 11.5 (6.2) / 11.3 (6.0)                                  |                 | L          | L            | H/UC         | L             |
|                           | Aydin (2016) [RCT] <sup>198</sup>                  | <u>Home vs hospital based exercise at 8 weeks</u><br>SMD -0.69 (-1.35, -0.02) | <u>ESR, BL / 8 weeks, mean (SD)</u><br>Home based exercise: 21.52 (12.98) / 17.47 (8.59)<br>Hospital based exercise: 30.38 (21.74) / 26.38 (16.42) |                 | L          | H/UC         | H/UC         | H/UC          |
|                           | Sveaas (2014) [RCT] <sup>200</sup>                 | <u>Exercise vs control at 3 months</u><br>SMD -0.27 (-1.09, 0.54)             | <u>ESR, BL / 3 months, mean (SD †)</u><br>Exercise: 15.8 (12.6) / 12.3 (6.8)<br>Control: 9.3 (6.7) / 15.3 (13.2)                                   |                 | L          | L            | H/UC         | L             |

† Mean (SD) estimated from median (range) using published formula<sup>87</sup>

Alloc. Conc. = allocation concealment, AMSTAR2 = Assessing the Methodological Quality of Systematic Reviews, axSpA = axial spondyloarthritis, BL = baseline, Blind. Asses. = Blinded assessors, Blind. Part. = blinded participants, CI = confidence interval, CRP = C-reactive protein, ESR = erythrocyte sedimentation rate, H/UC = high / unclear risk of bias, L = low risk of bias, MD = mean difference, Rand. Seq. = random sequence generation, RCT = randomised controlled trial, SD = standard deviation, SMD = standardised mean difference

Table – Aerobic + muscle strengthening exercises (axSpA), results and quality assessment

| Outcome (outcome measure) | Study (date) [study type]                        | Standardised result, SMD (95% CI) unless otherwise stated                             | Natural result                                                                                                                                     | AMSTAR2 quality | Rand. Seq. | Alloc. Conc. | Blind. Part. | Blind. Asses. |
|---------------------------|--------------------------------------------------|---------------------------------------------------------------------------------------|----------------------------------------------------------------------------------------------------------------------------------------------------|-----------------|------------|--------------|--------------|---------------|
| Spinal flexion            | Millner (2016) [MA] <sup>191</sup>               | <u>Exercise vs control</u><br>SMD 0.35 (0.02, 0.67)                                   |                                                                                                                                                    | Low             |            |              |              |               |
|                           | Rosu (2014) [RCT] <sup>199</sup>                 | <u>Pilates + extra exercises vs Pilates only at 48 weeks</u><br>SMD 1.65 (1.18, 2.11) | <u>Schober's test. BL / 48 weeks, mean (SD)</u><br>Pilates + extra exercises: 2.71 (0.76) / 4.56 (0.56)<br>Pilates only: 2.83 (0.77) / 3.48 (0.74) |                 | H/UC       | H/UC         | H/UC         | H/UC          |
|                           | Kraag (1990) [RCT] <sup>205</sup>                | <u>Exercise vs control, change BL-4 months</u><br>SMD 0.04 (-0.50, 0.57)              | <u>Schober, Change BL-4 months, mean (SD)</u><br>Exercise: -2.4 (6.7)<br>Control: -2.7 (9.9)                                                       |                 | H/UC       | H/UC         | H/UC         | H/UC          |
|                           | Lubrano (2007) [Single arm int.] <sup>209</sup>  |                                                                                       | <u>Schober, BL / 12 weeks, mean (SD)</u><br>1.9 (0.6) / 2.2 (0.6)                                                                                  |                 |            |              |              |               |
|                           | Viitanen (1995) [Single arm int.] <sup>211</sup> |                                                                                       | <u>Schober, BL mean(SD) / 3 weeks (post int.) mean (SD) / 12 months change from BL (95% CI)</u><br>3.3 (1.6) / 3.6 (1.6) / -0.1 (-0.2, 0.1)        |                 |            |              |              |               |
|                           | Kraag (1994) [Single arm int.] <sup>212</sup>    |                                                                                       | <u>Schober, 4 months / 8 months</u><br>Original exercise group: 13.4 (1.6) / 13.7 (1.5)<br>Original control group: 13.1 (1.5) / 13.2 (1.3)         |                 |            |              |              |               |
|                           | Viitanen (1992) [Finland] <sup>213</sup>         |                                                                                       | <u>Schober, BL / after intervention, mean (SD)</u><br>Men: 2.86 (1.54) / 3.26 (1.57)<br>Women: 3.20 (1.38) / 3.53 (1.35)                           |                 |            |              |              |               |

Alloc. Conc. = allocation concealment, AMSTAR2 = Assessing the Methodological Quality of Systematic Reviews, axSpA = axial spondyloarthritis, BL = baseline, Blind. Asses. = Blinded assessors, Blind. Part. = blinded participants, CI = confidence interval, H/UC = high / unclear risk of bias, L = low risk of bias, MD = mean difference, NRT = non-randomised trial, Rand. Seq. = random sequence generation, RCT = randomised controlled trial, SD = standard deviation, SMD = standardised mean difference

## Supplementary table 66 – Results from observational studies of aerobic + muscle strengthening exercise in axSpA

Table – Aerobic + muscle strengthening exercise (axSpA), results and quality assessment – observational studies

| Outcome (outcome measure) | Study (date) [study type]                 | Standardised result, SMD (95% CI) unless otherwise stated | Natural result                                                                                                                                                                                                                                                                     | Study Pop. | Attr. | Prog. Meas. | Outc. Meas. | Conf. | Stats. |
|---------------------------|-------------------------------------------|-----------------------------------------------------------|------------------------------------------------------------------------------------------------------------------------------------------------------------------------------------------------------------------------------------------------------------------------------------|------------|-------|-------------|-------------|-------|--------|
| Function                  | Escalas (2016) [Pros. Obs] <sup>214</sup> |                                                           | <u>20% improvement in BASFI over follow-up, RR (95% CI), reference = no physio</u><br>Early physio = 1.15 (0.91, 1.45) [fully adjusted]<br><u>50% improvement in BASFI over follow-up, RR (95% CI), reference = no physio</u><br>Early physio = 1.20 (0.87, 1.66) [fully adjusted] | L          | L     | M           | L           | L     | L      |

Attr. = attrition, axSpA = axial spondyloarthritis, BASFI = Bath Ankylosing Spondylitis Functional Index, CI = confidence interval, Conf. = confounding, L = low risk of bias, M = moderate risk of bias, Outc. Meas = outcome measurement, Prog. Meas. = prognostic factor measurement, Pros. Obs. = prospective observational, Stats. = statistical analysis, Study Pop. = study population

## Supplementary table 67 – Description of reviews of studies of aquatic exercise in axSpA

Table – Aquatic exercises (axSpA), description of reviews

| Authors (date)               | Review type | Study type included | Exposure detail                                        | Number of studies included | Funders                                                                                                                |
|------------------------------|-------------|---------------------|--------------------------------------------------------|----------------------------|------------------------------------------------------------------------------------------------------------------------|
| Regel (2017) <sup>179</sup>  | SR          | RCTs                | Aerobic exercises including walking and rehabilitation | 1                          | <b>Professional bodies</b> (European League Against Rheumatism, Assessment of Spondyloarthritis international Society) |
| Sharan (2017) <sup>195</sup> | SR          | RCTs, reviews       | Studies of aerobic and strengthening included          | 30                         | <b>Not reported</b> – Authors declared no conflicts of interest                                                        |
| Zao (2017) <sup>215</sup>    | SR          | 5                   | Aquatic exercises                                      | 5                          | <b>Not reported</b> – Authors declared no conflicts of interest                                                        |

axSpA = axial spondyloarthritis, RCT = randomised controlled trial, SR = systematic review

## Supplementary table 68 – Description of original studies of aquatic exercise in axSpA

Table – Aquatic exercises (axSpA), description of included studies

| Author (date) [country]                  | Study design | Inclusion criteria                                                                                                                                                                                                                                                                                                                                                                                     | Exposure detail                                                                                                                                                                  | N                       | Age years, mean (SD)                              | N (%) female                              | Funders                                                           |
|------------------------------------------|--------------|--------------------------------------------------------------------------------------------------------------------------------------------------------------------------------------------------------------------------------------------------------------------------------------------------------------------------------------------------------------------------------------------------------|----------------------------------------------------------------------------------------------------------------------------------------------------------------------------------|-------------------------|---------------------------------------------------|-------------------------------------------|-------------------------------------------------------------------|
| Dundar (2014) [Turkey] <sup>216</sup>    | RCT          | New York Criteria<br>Exclusions: prosthesis, hypertension, cardiovascular disease, chronic obstructive pulmonary disease, exercising regular for past 3 months                                                                                                                                                                                                                                         | 1) Aquatic exercise – 5x per week. Started with poolside range of motion exercises then 40 mins aquatic exercise in pool and the 5 min cool down<br>2) Home based land exercises | 1) 35<br>2) 34          | 1) 42.3 (11.3)<br>2) 43.1 (11.7)                  | 1) 5 (14.3)<br>2) 6 (17.6)                | <b>Not reported</b> –<br>Authors declared no conflict of interest |
| Karapolat (2009) [Turkey] <sup>217</sup> | RCT          | Modified New York criteria, aged 18=75 years, knew how to swim, able to understand program<br>Exclusions: Inability / unwillingness to participate, systemic organic involvement, active peripheral joint involvement, severe comorbidity affecting lung, heart, liver kidneys, receiving DMARDs other than sulfasalazine or methotrexate, previous use of TNFi, regular exercise during past 6 months | 1) Swimming + conventional exercise<br>2) Walking + conventional exercise<br>3) Conventional exercise only<br>“conventional exercises” not defined                               | 1) 13<br>2) 12<br>3) 12 | 1) 50.2 (12.4)<br>2) 46.9 (13.4)<br>3) 48.4 (9.5) | 1) 3 (23.1)<br>2) 4 (33.3)<br>3) 3 (25.0) | <b>No funding</b>                                                 |

axSpA = axial spondyloarthritis N = number, RCT = randomised controlled trial, SD = standard deviation, TNFi = tumour necrosis factor inhibitors



## Supplementary table 69 – Results from reviews and interventional studies of aquatic exercise in axSpA

Table – Aquatic exercises (axSpA), results and quality assessment

| Outcome (outcome measure)                          | Study (date) [study type]                                                          | Standardised result, SMD (95% CI) unless otherwise stated                                                                             | Natural result                                                                                                                                                                                                                                              | AMSTAR2 quality  | Rand. Seq. | Alloc. Conc. | Blind. Part. | Blind. Asses. |
|----------------------------------------------------|------------------------------------------------------------------------------------|---------------------------------------------------------------------------------------------------------------------------------------|-------------------------------------------------------------------------------------------------------------------------------------------------------------------------------------------------------------------------------------------------------------|------------------|------------|--------------|--------------|---------------|
| Pain                                               | Regel (2017) [SR] <sup>179</sup>                                                   |                                                                                                                                       | 1 study <sup>216</sup> reported a moderate difference between the groups                                                                                                                                                                                    | Moderate         |            |              |              |               |
|                                                    | Zao (2017) [SR] <sup>215</sup>                                                     |                                                                                                                                       | 1 study reported improvements                                                                                                                                                                                                                               | Low              |            |              |              |               |
|                                                    | Dundar (2014) [RCT] <sup>216</sup>                                                 | <u>Aquatic vs land at 4 weeks</u><br>SMD -0.29 (-0.77, 0.18)                                                                          | <u>Pain VAS, BL / 4 weeks / 12 weeks, mean (SD)</u><br>Aquatic exercise: 5.1 (2.6) / 2.6 (2.5) / 2.5 (2.6)<br>Land base exercise: 4.9 (2.8) / 3.3 (2.3) / 3.4 (2.5)                                                                                         |                  | H/UC       | H/UC         | H/UC         | L             |
|                                                    | Karapolat (2009) [RCT] <sup>217</sup>                                              | <u>Aquatic vs control at 6 weeks</u><br>vs walking: SMD 0.19 (-0.60, 0.98)<br>vs conventional exercise only: SMD 0.13 (-0.66, 0.91)   | <u>Nottingham Health Profile - pain, BL / 6 weeks, mean (SD)</u><br>Aquatic + conventional exercise: 27.89 (32.74) / 25.00 (28.41)<br>Walking+ conventional exercise: 25.00 (25.62) / 19.79 (26.89)<br>Conventional exercise: 25.75 (25.28) / 21.04 (34.32) |                  | H/UC       | H/UC         | H/UC         | H/UC          |
|                                                    | Bespoke meta-analysis including <sup>216;217</sup>                                 | <u>Aquatic exercise vs control</u><br>SMD -0.18 (-0.59, 0.23) I <sup>2</sup> 0%                                                       |                                                                                                                                                                                                                                                             |                  |            |              |              |               |
| Function                                           | Regel (2017) [SR] <sup>179</sup>                                                   |                                                                                                                                       | 1 study <sup>216</sup> reported a no difference between the groups                                                                                                                                                                                          | Moderate         |            |              |              |               |
|                                                    | Sharan (2017) [SR] <sup>195</sup>                                                  |                                                                                                                                       | Group therapies in the water had beneficial effects on function                                                                                                                                                                                             | Critically low § |            |              |              |               |
|                                                    | Zao (2017) [SR] <sup>215</sup>                                                     |                                                                                                                                       | 2/2 studies reported improvements                                                                                                                                                                                                                           | Low              |            |              |              |               |
|                                                    | Dundar (2014) [RCT] <sup>216</sup>                                                 | <u>Aquatic vs land at 4 weeks</u><br>SMD 0.00 (-0.47, 0.47)                                                                           | <u>BASFI, BL / 4 weeks / 12 weeks, mean (SD)</u><br>Aquatic exercise: 3.5 (2.9) / 2.5 (2.2) / 2.6 (2.4)<br>Land base exercise: 3.6 (2.8) / 2.5 (2.2) / 2.6 (2.3)                                                                                            |                  | H/UC       | H/UC         | H/UC         | L             |
|                                                    | Karapolat (2009) [RCT] <sup>217</sup>                                              | <u>Aquatic vs control at 6 weeks</u><br>vs walking: SMD -0.15 (-0.94, 0.63)<br>vs conventional exercise only: SMD -0.57 (-1.37, 0.23) | <u>BASFI, BL / 6 weeks, mean (SD)</u><br>Aquatic + conventional exercise: 2.34 (1.70) / 1.97 (1.24)<br>Walking+ conventional exercise: 2.25 (1.81) / 2.25 (2.30)<br>Conventional exercise: 2.70 (2.52) / 3.13 (2.65)                                        |                  | H/UC       | H/UC         | H/UC         | H/UC          |
| Bespoke meta-analysis including <sup>216;217</sup> | <u>Aquatic exercise vs control</u><br>SMD -0.19 (-0.71, 0.34) I <sup>2</sup> 30.3% |                                                                                                                                       |                                                                                                                                                                                                                                                             |                  |            |              |              |               |

Alloc. Conc. = allocation concealment, AMSTAR2 = Assessing the Methodological Quality of Systematic Reviews, axSpA = axial spondyloarthritis, BASFI = Bath Ankylosing Spondylitis Functional Index, BL = baseline, Blind. Asses. = Blinded assessors, Blind. Part. = blinded participants, CI = confidence interval, H/UC = high / unclear risk of bias, L = low risk of bias, Rand. Seq. = random sequence generation, RCT = randomised controlled trial, SD = standard deviation, SMD = standardised mean difference, VAS = visual analogue scale

Table – Aquatic exercises (axSpA), results and quality assessment

| Outcome (outcome measure) | Study (date) [study type]                          | Standardised result, SMD (95% CI) unless otherwise stated                                                                             | Natural result                                                                                                                                                                                                        | AMSTAR2 quality | Rand. Seq. | Alloc. Conc. | Blind. Part. | Blind. Asses. |
|---------------------------|----------------------------------------------------|---------------------------------------------------------------------------------------------------------------------------------------|-----------------------------------------------------------------------------------------------------------------------------------------------------------------------------------------------------------------------|-----------------|------------|--------------|--------------|---------------|
| Disease activity          | Regel (2017) [SR] <sup>179</sup>                   |                                                                                                                                       | 1 study <sup>216</sup> reported a small difference between the groups                                                                                                                                                 | Moderate        |            |              |              |               |
|                           | Zao (2017) [SR] <sup>215</sup>                     |                                                                                                                                       | 2/3 studies reported improvements                                                                                                                                                                                     | Low             |            |              |              |               |
|                           | Dundar (2014) [RCT] <sup>216</sup>                 | <u>Aquatic vs land at 4 weeks</u><br>SMD -0.11 (-0.58, 0.36)                                                                          | <u>BASDAI, BL / 4 weeks / 12 weeks, mean (SD)</u><br>Aquatic exercise: 3.9 (1.9) / 2.6 (1.5) / 2.7 (1.7)<br>Land base exercise: 4.0 (2.3) / 2.8 (2.1) / 2.8 (2.5)                                                     |                 | H/UC       | H/UC         | H/UC         | L             |
|                           | Karapolat (2009) [RCT] <sup>217</sup>              | <u>Aquatic vs control at 6 weeks</u><br>vs walking: SMD -0.41 (-1.20, 0.39)<br>vs conventional exercise only: SMD -0.08 (-0.86, 0.71) | <u>BASDAI, BL / 6 weeks, mean (SD)</u><br>Aquatic + conventional exercise: 2.73 (1.93) / 1.90 (1.61)<br>Walking+ conventional exercise: 2.49 (1.68) / 2.68 (2.19)<br>Conventional exercise: 2.65 (2.13) / 2.03 (1.86) |                 | H/UC       | H/UC         | H/UC         | H/UC          |
|                           | Bespoke meta-analysis including <sup>216,217</sup> | <u>Aquatic exercise vs control</u><br>SMD -0.10 (-0.51, 0.30) I <sup>2</sup> 30.3%                                                    |                                                                                                                                                                                                                       |                 |            |              |              |               |
| Stiffness                 | Zao (2017) [SR] <sup>215</sup>                     |                                                                                                                                       | 3/3 studies reported improvements                                                                                                                                                                                     | Low             |            |              |              |               |
| Spinal mobility           | Regel (2017) [SR] <sup>179</sup>                   |                                                                                                                                       | 1 study <sup>216</sup> reported a small difference between the groups                                                                                                                                                 | Moderate        |            |              |              |               |
|                           | Dundar (2014) [RCT] <sup>216</sup>                 | <u>Aquatic vs land at 4 weeks</u><br>SMD 0.04 (-0.43, 0.51)                                                                           | <u>BASMI, BL / 4 weeks / 12 weeks, mean (SD)</u><br>Aquatic exercise: 5.3 (2.7) / 4.0 (2.4) / 4.1 (2.6)<br>Land base exercise: 5.2 (3.1) / 3.9 (2.8) / 4.0 (2.7)                                                      |                 | H/UC       | H/UC         | H/UC         | L             |
|                           | Karapolat (2009) [RCT] <sup>217</sup>              | <u>Aquatic vs control at 6 weeks</u><br>vs walking: SMD 0.14 (-0.65, 0.93)<br>vs conventional exercise only: SMD 0.33 (-0.46, 1.12)   | <u>BASMI, BL / 6 weeks, mean (SD)</u><br>Aquatic + conventional exercise: 5.15 (2.27) / 4.54 (2.07)<br>Walking+ conventional exercise: 4.54 (2.58) / 4.18 (2.99)<br>Conventional exercise: 3.83 (3.75) / 3.75 (2.67)  |                 | H/UC       | H/UC         | H/UC         | H/UC          |
|                           | Bespoke meta-analysis including <sup>216,217</sup> | <u>Aquatic exercise vs control</u><br>SMD 0.12 (-0.29, 0.52) I <sup>2</sup> 0%                                                        |                                                                                                                                                                                                                       |                 |            |              |              |               |

Alloc. Conc. = allocation concealment, AMSTAR2 = Assessing the Methodological Quality of Systematic Reviews, axSpA = axial spondyloarthritis, BASDAI = Bath Ankylosing Spondylitis Disease Activity Index, BASMI = Bath Ankylosing Spondylitis Metrology Index, BL = baseline, Blind. Asses. = Blinded assessors, Blind. Part. = blinded participants, CI = confidence interval, H/UC = high / unclear risk of bias, L = low risk of bias, Rand. Seq. = random sequence generation, RCT = randomised controlled trial, SD = standard deviation, SMD = standardised mean difference

Table – Aquatic exercises (axSpA), results and quality assessment

| Outcome (outcome measure) | Study (date) [study type]             | Standardised result, SMD (95% CI) unless otherwise stated                                                                            | Natural result                                                                                                                                                                                                       | AMSTAR2 quality | Rand. Seq. | Alloc. Conc. | Blind. Part. | Blind. Asses. |
|---------------------------|---------------------------------------|--------------------------------------------------------------------------------------------------------------------------------------|----------------------------------------------------------------------------------------------------------------------------------------------------------------------------------------------------------------------|-----------------|------------|--------------|--------------|---------------|
| Quality of life           | Zao (2017) [SR] <sup>215</sup>        |                                                                                                                                      | 1 study reported improvements                                                                                                                                                                                        | Low             |            |              |              |               |
| Depression                | Karapolat (2009) [RCT] <sup>217</sup> | <u>Aquatic vs control at 6 weeks</u><br>vs walking: SMD -0.62 (-1.42, 0.19)<br>vs conventional exercise only: SMD 0.06 (-0.73, 0.85) | <u>BDI, BL / 6 weeks, mean (SD)</u><br>Aquatic + conventional exercise: 6.85 (6.52) / 5.47 (4.77)<br>Walking+ conventional exercise: 8.50 (5.36) / 9.70 (8.59)<br>Conventional exercise: 6.17 (10.02) / 5.00 (10.22) |                 | H/UC       | H/UC         | H/UC         | H/UC          |
| Spinal flexion            | Dundar (2014) [RCT] <sup>216</sup>    | <u>Aquatic vs land at 4 weeks</u><br>SMD -0.04 (-0.52, 0.43)                                                                         | <u>Schober's test, BL / 4 weeks / 12 weeks, mean (SD)</u><br>Aquatic exercise: 2.9 (1.9) / 3.7 (2.1) / 3.7 (2.4)<br>Land base exercise: 3.1 (2.1) / 3.8 (2.4) / 3.7 (2.2)                                            |                 | H/UC       | H/UC         | H/UC         | L             |

Alloc. Conc. = allocation concealment, AMSTAR2 = Assessing the Methodological Quality of Systematic Reviews, axSpA = axial spondyloarthritis, BDI = Beck Depression Inventory, BL = baseline, Blind. Asses. = Blinded assessors, Blind. Part. = blinded participants, CI = confidence interval, H/UC = high / unclear risk of bias, L = low risk of bias, Rand. Seq. = random sequence generation, RCT = randomised controlled trial, SD = standard deviation, SMD = standardised mean difference

Table – Aquatic exercises (axSpA), SF36 results at final follow-up, mean (SD)

| Author (date)                          | PCS | MCS | GH          | PF          | RP          | RE          | SF          | BP          | V           | MH          |
|----------------------------------------|-----|-----|-------------|-------------|-------------|-------------|-------------|-------------|-------------|-------------|
| Dundar (2014) [Aquatic] <sup>216</sup> |     |     | 77.4 (21.3) | 80.8 (26.8) | 77.7 (29.3) | 80.4 (31.1) | 89.5 (32.1) | 78.6 (29.9) | 74.8 (25.3) | 89.4 (23.7) |
| Dundar (2014) [Control] <sup>216</sup> |     |     | 65.2 (25.6) | 76.4 (24.9) | 71.2 (26.3) | 67.5 (27.3) | 74.2 (28.3) | 66.5 (21.3) | 65.7 (26.1) | 82.4 (23.8) |

axSpA = axial spondyloarthritis, BP = bodily pain, FU = follow-up, GH = general health, MCS = mental component score, MH = mental health, PCS = physical component score, PF = physical function, RE = role emotional, RP = role physical, SD = standard deviation, SF = social functioning, V = vitality

## Supplementary table 70 – Description of reviews of studies of home-based exercise in axSpA

Table – Home-based exercises (axSpA), description of reviews

| Authors (date)                | Review type | Study type included | Exposure detail                                                                                                                                            | Number of studies included | Funders                                                         |
|-------------------------------|-------------|---------------------|------------------------------------------------------------------------------------------------------------------------------------------------------------|----------------------------|-----------------------------------------------------------------|
| Liang (2015) <sup>192</sup>   | MA          | RCTs                | Home-based exercise programs including muscle relaxation, exercises for spine, range of motion, stretching, muscle strengthening and respiratory exercises | 6                          | <b>Not reported</b> – Authors declared no conflicts of interest |
| O'Dwyer (2014) <sup>180</sup> | SR          | RCTs                | Unsupervised exercise interventions vs Supervised                                                                                                          | 4                          | <b>Not reported</b> – Authors declared no conflicts of interest |

axSpA = axial spondyloarthritis, MA = meta-analysis, RCT = randomised controlled trial, SR = systematic review

## Supplementary table 71 – Description of original studies of home-based exercise in axSpA

Table – Home based interventions (axSpA), description of included studies

| Author (date) [country]                        | Study design | Inclusion criteria                                                                                                                                                                                                                                                                                                                        | Exposure detail                                                                                                                                                                                               | N                | Age years, mean (SD)             | N (%) female               | Funders                                                         |
|------------------------------------------------|--------------|-------------------------------------------------------------------------------------------------------------------------------------------------------------------------------------------------------------------------------------------------------------------------------------------------------------------------------------------|---------------------------------------------------------------------------------------------------------------------------------------------------------------------------------------------------------------|------------------|----------------------------------|----------------------------|-----------------------------------------------------------------|
| Aydin (2016) [Turkey] <sup>198</sup>           | RCT          | New York criteria, aged 20-65 years old, not practising regular exercise during previous 6 months, able to understand questionnaires, no co-existing systemic disease, no TNFi therapy, heart functional class I-III                                                                                                                      | 1) Home based exercise – callisthenic exercises (consecutive and repetitive exercises aimed at training large muscle groups through aerobic and step routines)<br>2) Hospital based exercises – same as above | 1) 19<br>2) 18   | 1) 33.5 (7.7)<br>2) 35.8 (8.1)   | 1) 8 (42.1)<br>2) 9 (50.0) | <b>Not reported</b> – authors declared no conflict of interest  |
| Karahan (2016) [Turkey] <sup>181</sup>         | RCT          | Modified New York criteria, aged 18-65 years, lack of regular exercise during previous 6 months, ability to understand questionnaires<br>Exclusions: cardiopulmonary dysfunction, central or peripheral neurological disease, issues hindering standing, psychiatric disorder, visual disorder, hearing disorder                          | 1) Exergram – Microsoft Xbox 360 Kinect game console – 30 mins per day, 5x per week<br>p) No exercise program                                                                                                 | 1) 28<br>p) 29   | 1) 36.1 (12.4)<br>p) 36.6 (11.3) | 1) 6 (21.4)<br>p) 7 (24.1) | <b>Not reported</b> – Authors declared no conflicts of interest |
| Hsieh (2014) [Taiwan] <sup>218</sup>           | RCT          | Modified New York criteria, aged 20-65 years, well controlled disease, symptom duration >6 months<br>Exclusions: presence of serious medical conditions or acute febrile disorders, history of arthroplasties or major operations in the knee or hip joint, severe arthritis or contracture of knee or hip joints which preclude exercise | 1) Range of motion and strengthening exercises at home<br>2) Range of motion only at home                                                                                                                     | 1) 9<br>2) 10    | 1) 36.2 (11.7)<br>2) 42.1 (8.8)  | 1) 3 (33.3)<br>2) 3 (30.0) | <b>Government</b> (Taiwan National Science Council)             |
| Rodriguez-Lozano (2013) [Spain] <sup>219</sup> | RCT          | Modified New York criteria, aged 18-70 years<br>Exclusions: severe AS with significant loss of motion and ankyloses precluding physical exercise, patients with other spondyloarthritis or concomitant diseases in which exercise could be contra-indicated                                                                               | 1) Education and range of motion / stretching exercises<br>p) Usual care                                                                                                                                      | 1) 381<br>p) 375 | 1) 45 (12)<br>p) 46 (11)         | 1) 29%<br>p) 27%           | <b>Professional body</b> (Spanish Society of Rheumatology)      |
| Lim (2005) [South Korea] <sup>220</sup>        | RCT          | Outpatient without complications, sedentary, understands questionnaires, no changes in medications, functional class II                                                                                                                                                                                                                   | 1) Home based exercise program – muscle relaxation, flexibility, muscular strength, breathing and posture.<br>p) Waitlist control                                                                             | 1) 25<br>p) 25   | 1) 38.8 (9.3)<br>p) 28.1 (7.5)   | 1) 6 (24.0)<br>p) 5 (20.0) | <b>Not reported</b>                                             |

AS = ankylosing spondylitis, axSpA = axial spondyloarthritis, N = number, RCT = randomised controlled trial, SD = standard deviation

Table – Home based interventions (axSpA), description of included studies

| Author (date) [country]                | Study design | Inclusion criteria                                                                                                                                                                                                                                                                                    | Exposure detail                                                                                                                                                                                                                                                  | N                | Age years, mean (SD)                                | N (%) female                   | Funders                                                                                                                                        |
|----------------------------------------|--------------|-------------------------------------------------------------------------------------------------------------------------------------------------------------------------------------------------------------------------------------------------------------------------------------------------------|------------------------------------------------------------------------------------------------------------------------------------------------------------------------------------------------------------------------------------------------------------------|------------------|-----------------------------------------------------|--------------------------------|------------------------------------------------------------------------------------------------------------------------------------------------|
| Analay (2003) [Turkey] <sup>202</sup>  | RCT          | Amor criteria, aged 18-55 years, able to participate in exercise<br>Exclusions: systemic organ involvement, severe deformities or limited hip and knee joint motion preventing cycling, treated by physiotherapist in last 3 months or practising regular exercise and those received DMARDs          | 1) Intensive exercise regime given by physiotherapist. Program included stretching, mobilization, aerobic exercises on exercise bike, strengthening exercises for lower and upper extremities and back<br>2) Practice same exercises at home                     | 1) 23<br>2) 22   | 1) 37.6 (11.3)<br>2) 34.3 (7.9)                     | 1) 3 (13.0)<br>2) 4 (18.2)     | <b>Not reported</b>                                                                                                                            |
| Sweeney (2002) [UK] <sup>185</sup>     | RCT          | Aged 16-65 years                                                                                                                                                                                                                                                                                      | 1) Delivered a home exercise regime video, booklet and wall chart<br>p) Usual care                                                                                                                                                                               | 1) 100<br>p) 100 | 1) 47 (10.2)<br>p) 47 (9.6)                         | 1) 30 (30%) F<br>p) 32 (32%) F | <b>Industry</b> (Bupa), <b>Charity</b> (National Ankylosing Spondylitis Society, John Coates Charitable Trust, and Col. W.W. Pilkington Trust) |
| Kraag (1990) [Canada] <sup>205</sup>   | RCT          | New York criteria, English language, stable steroids for past 3 months, DMARDs stable for 6 months, no surgery in next 4 months, not pregnant and using contraception<br>Exclusions: 10% loss of flexion in either hip joint, receiving contravening treatment                                        | 1) Home physiotherapy – therapeutic exercise aimed at increasing strength and endurance + education about posture<br>p) Waitlist control                                                                                                                         | 1) 26<br>p) 27   | 1) 18-35: 13<br>≥36: 13<br>p) 18-35: 14<br>≥ 36: 13 | 1) 6 (23.1)<br>p) 5 (18.5)     | <b>Government</b> (Health and Welfare Canada)                                                                                                  |
| Yigit (2013) [Turkey] <sup>221</sup>   | NRT          | Aged 18-65 years, Modified New York Criteria, Received TNFi for ≥3 months, understand context of program<br>Exclusions: Severe comorbidities affecting heart, lung, liver or kidneys, mental retardation, presence of severe arthritis or prosthetic device and exercising regularly in past 6 months | 1) Home based exercise program – 5x per week, muscle relaxation, flexibility, range of motion and strengthening exercises as well as exercises to improve posture<br>p) Group who did not do the exercise program                                                | 1) 20<br>p) 20   | 1) 40.3 (8.1)<br>p) 36.5 (7.2)                      | 1) 5 (25.0)<br>p) 3 (15.0)     | <b>Not reported</b> – authors declared no conflict of interest                                                                                 |
| Aytekin (2012) [Turkey] <sup>207</sup> | NRT          | Modified New York criteria<br>Exclusions: presences of prosthesis, hypertension, cardiovascular disease, chronic obstructive pulmonary disease, posteroanterior chest X-ray abnormalities                                                                                                             | Home-based exercise regime including range of motion exercises, stretching, strengthening, posture and respiratory exercises – demonstrated by physiotherapist<br>1) Those who performed exercises ≥5x per week<br>p) Those who performed exercises <5x per week | 1) 34<br>p) 32   | 1) 34.4 (9.5)<br>p) 35.8 (6.7)                      | 1) 9 (26.5)<br>p) 5 (15.6)     | <b>Not reported</b> – authors declared no conflict of interest                                                                                 |

axSpA = axial spondyloarthritis, N = number, NRT = non-randomised trial, RCT = randomised controlled trial, SD = standard deviation, UK = United Kingdom

Table – Home based interventions (axSpA), description of included studies

| Author (date) [country]                  | Study design    | Inclusion criteria                                                                                                                                                                                                                                                          | Exposure detail                                                                                                                                                                                                                                            | N                       | Age years, mean (SD)                             | N (%) female                             | Funders                                                        |
|------------------------------------------|-----------------|-----------------------------------------------------------------------------------------------------------------------------------------------------------------------------------------------------------------------------------------------------------------------------|------------------------------------------------------------------------------------------------------------------------------------------------------------------------------------------------------------------------------------------------------------|-------------------------|--------------------------------------------------|------------------------------------------|----------------------------------------------------------------|
| Durmus (2009) [Turkey] <sup>222</sup>    | NRT             | New York criteria, not been practicing regular exercise during previous 6 months, able to understand content of questionnaire / experimental schedules, no co-existent systemic diseases, not been given TNFi, functional class I-III                                       | 1) Home based exercise program – 7 days per week, 20 exercises for muscle relaxation, strength stronger breathing and straighter posture<br>p) Non-exercise control                                                                                        | 1) 25<br>p) 18          | 1) 37.3 (7.3)<br>p) 42.3 (8.2)                   | 1) 4 (16.0)<br>p) 4 (22.2)               | <b>Not reported</b> – authors declared no conflict of interest |
| Durmus (2009) [Turkey] <sup>223</sup>    | NRT             | New York criteria, sedentary<br>Exclusions: Medical condition that impaired function more than AS, those with co-existent cardiac or respiratory diseases, severe arthritis, taking TNFi                                                                                    | 1) "Global Posture Re-education" - Muscle chains are shortened and then stretched and strengthened. Includes dynamic axial exercise, static posture exercise, stretching.<br>2) Conventional exercises – motion and flexibility<br>p) Non-exercise control | 1) 19<br>2) 19<br>p) 13 | 1) 38.1 (11.1)<br>2) 35.9 (7.3)<br>p) 43.5 (7.3) | 1) 5 (26.3)<br>2) 2 (10.5)<br>p) 1 (7.7) | <b>Not reported</b>                                            |
| Karapolat (2008) [Turkey] <sup>224</sup> | NRT             | Modified New York criteria, aged 18-75 years, clinically stable<br>Exclusions: Inability or unwillingness to participate in physiotherapy, systemic organic involvement, severe comorbidity of heart, lung, liver or kidneys, practising regular exercises in past 6 months | 1) Group exercise program – respiratory exercises, stretching, mobilization, strengthening exercises<br>2) Those who couldn't participate in the group sessions performed the same exercises at home                                                       | 1) 22<br>2) 16          | 1) 47.5 (11.8)<br>2) 46.6 (14.8)                 | 1) 32%<br>2) 31%                         | <b>Not reported</b>                                            |
| Kraag (1994) [Canada] <sup>212</sup>     | Single arm int. | New York criteria, English language, stable steroids for past 3 months, DMARDs stable for 6 months, no surgery in next 4 months, not pregnant and using contraception<br>Exclusions: 10% loss of flexion in either hip joint, receiving contravening treatment              | Same intervention as Kraag (1990) <sup>205</sup> – original intervention group were followed up and provided support as needed, control group were given intervention                                                                                      | 46                      | not reported                                     | not reported                             |                                                                |

axSpA = axial spondyloarthritis, N = number, NRT = non-randomised trial, RCT = randomised controlled trial, SD = standard deviation, TNFi = Tumour Necrosis Factor Inhibitor

## Supplementary table 72 – Results from reviews and interventional studies of home-based exercise in axSpA

Table – Home based exercises (axSpA), results and quality assessment

| Outcome (outcome measure) | Study (date) [study type]                              | Standardised result, SMD (95% CI) unless otherwise stated                                                                                                                | Natural result                                                                                                                                                                       | AMSTAR2 quality | Rand. Seq. | Alloc. Conc. | Blind. Part. | Blind. Asses. |
|---------------------------|--------------------------------------------------------|--------------------------------------------------------------------------------------------------------------------------------------------------------------------------|--------------------------------------------------------------------------------------------------------------------------------------------------------------------------------------|-----------------|------------|--------------|--------------|---------------|
| Pain                      | Liang (2015) [MA] <sup>192</sup>                       | <u>Exercise vs control</u><br>SMD -0.22 (-0.49, 0.06)                                                                                                                    |                                                                                                                                                                                      | Moderate        |            |              |              |               |
|                           | Karahan (2016) [RCT] <sup>181</sup>                    | <u>Exercise vs control at 8 weeks</u><br>SMD -0.67 (-1.21, -0.14)                                                                                                        | <u>Pain VAS, BL / 8 weeks, mean (SD)</u><br>Exercise: 4.9 (2.0) / 3.6 (1.7)<br>Control: 5.1 (2.2) / 5.0 (2.4)                                                                        |                 | H/UC       | L            | H/UC         | H/UC          |
|                           | Rodriguez-Lozano (2013) [RCT] <sup>219</sup>           | <u>Exercise vs control, change BL-24 weeks</u><br>SMD -0.14 (-0.28, 0.01)                                                                                                | <u>Pain VAS (0-10), change BL-24 weeks, mean (SD)‡</u><br>Exercise: -0.76 (2.29)<br>Control: -0.44 (2.37)                                                                            |                 | L          | L            | H/UC         | H/UC          |
|                           | Lim (2005) [RCT] <sup>220</sup>                        |                                                                                                                                                                          | <u>Pain, % change BL-8 weeks</u><br>Exercise: -33%<br>Control: 28%                                                                                                                   |                 | H/UC       | H/UC         | H/UC         | L             |
|                           | Analay (2003) [RCT] <sup>202</sup>                     | <u>Group vs home exercise</u><br>SMD 0.07 (-0.52, 0.66)                                                                                                                  | <u>Rest pain, BL / 6 weeks / 3 months, mean (SD)</u><br>Group exercise: 3.82 (3.4) / 3.3 (2.3) / 3.43 (2.5)<br>Home exercise: 3.13 (2.6) / 3.09 (3.6) / 3.18 (3.1)                   |                 | H/UC       | L            | H/UC         | L             |
|                           | Kraag (1990) [RCT] <sup>205</sup>                      | <u>Exercise vs control, change BL-4 months</u><br>SMD 0.39 (-1.50, 0.94)                                                                                                 | <u>Pain, Change BL-4 months, mean (SD)</u><br>Exercise: 5.2 (26.3)<br>Control: -5.2 (26.7)                                                                                           |                 | H/UC       | H/UC         | H/UC         | H/UC          |
|                           | Bespoke meta-analysis including <sup>181;205;219</sup> | <u>Exercise vs control</u><br>SMD -0.68 (-1.41, 0.05), I <sup>2</sup> 88.9%                                                                                              |                                                                                                                                                                                      |                 |            |              |              |               |
|                           | Aytekin (2012) [NRT] <sup>207</sup>                    | <u>Exercise ≥5x per week vs exercise &lt;5x per week at 3 months</u><br>SMD 0.10 (-0.38, 0.58)                                                                           | <u>Pain VAS, BL / 3 months</u><br>Exercise ≥5x per week: 5.1 (2.1) / 4.1 (2.0)<br>Exercise <5x per week: 3.9 (2.3) / 3.9 (2.0)                                                       |                 |            |              |              |               |
|                           | Durmus (2009) [NRT] <sup>223</sup>                     | <u>Muscle strengthening exercise vs conventional exercises</u><br>SMD -0.29 (-0.93, 0.35)<br><u>Muscle strengthening exercise vs control</u><br>SMD -0.78 (-1.51, -0.05) | <u>Pain VAS, BL / 12 weeks</u><br>Muscle strengthening exercise: 4.78 (2.63) / 1.42 (1.80)<br>Conventional exercise: 4.84 (2.81) / 1.94 (1.80)<br>Control: 3.46 (2.40) / 3.00 (2.34) |                 |            |              |              |               |
|                           | Karapolat (2008) [NRT] <sup>224</sup>                  | <u>Home exercise vs group exercise at 6 weeks</u><br>SMD 0.77 (0.11, 1.44)                                                                                               | <u>NHP - pain, BL / 6 weeks, mean (SD)</u><br>Home exercise: 45.81 (32.00) / 39.50 (29.85)<br>Group exercise: 35.75 (32.11) / 19.55 (22.39)                                          |                 |            |              |              |               |
|                           | Kraag (1994) [Single arm int.] <sup>212</sup>          |                                                                                                                                                                          | <u>Pain, 4 months / 8 months</u><br>Original exercise group: 27.9 (21.6) / 25.1 (21.1)<br>Original control group: 42.8 (25.8) / 42.2 (32.2)                                          |                 |            |              |              |               |

Alloc. Conc. = allocation concealment, AMSTAR2 = Assessing the Methodological Quality of Systematic Reviews, axSpA = axial spondyloarthritis, BL = baseline, Blind. Asses. = Blinded assessors, Blind. Part. = blinded participants, CI = confidence interval, H/UC = high / unclear risk of bias, L = low risk of bias, MD = mean difference, NHP = Nottingham Health Profile, Rand. Seq. = random sequence generation, RCT = randomised controlled trial, SD = standard deviation, SMD = standardised mean difference, VAS = visual analogue scale



Table – Home based exercises (axSpA), results and quality assessment

| Outcome (outcome measure) | Study (date) [study type]                                                                                             | Standardised result, SMD (95% CI) unless otherwise stated                                                                                                                      | Natural result                                                                                                                                                                  | AMSTAR2 quality | Rand. Seq. | Alloc. Conc. | Blind. Part. | Blind. Asses. |
|---------------------------|-----------------------------------------------------------------------------------------------------------------------|--------------------------------------------------------------------------------------------------------------------------------------------------------------------------------|---------------------------------------------------------------------------------------------------------------------------------------------------------------------------------|-----------------|------------|--------------|--------------|---------------|
| Function                  | Liang (2015) [MA] <sup>192</sup>                                                                                      |                                                                                                                                                                                | <u>BASFI, mean difference</u><br>MD -0.39 (-0.57, -0.20)                                                                                                                        | Moderate        |            |              |              |               |
|                           | O'Dwyer (2014) <sup>180</sup>                                                                                         |                                                                                                                                                                                | 1/4 studies reported significant difference in favour of group therapy for function                                                                                             | Moderate        |            |              |              |               |
|                           | Aydin (2016) [RCT] <sup>198</sup>                                                                                     | <u>Home vs hospital based exercise at 8 weeks</u><br>SMD 0.48 (-0.18, 1.13)                                                                                                    | <u>BASFI, BL / 8 weeks, mean (SD)</u><br>Home based exercise: 3.64 (2.87) / 3.78 (2.67)<br>Hospital based exercise: 3.16 (2.43) / 2.63 (2.07)                                   |                 | L          | H/UC         | H/UC         | H/UC          |
|                           | Karahan (2016) [RCT] <sup>181</sup>                                                                                   | <u>Exercise vs control at 8 weeks</u><br>SMD -0.66 (-1.19, -0.13)                                                                                                              | <u>BASFI, BL / 8 weeks, mean (SD)</u><br>Exercise: 3.7 (1.5) / 2.9 (1.3)<br>Control: 3.9 (1.6) / 3.9 (1.7)                                                                      |                 | H/UC       | L            | H/UC         | H/UC          |
|                           | Hsieh (2014) [RCT] <sup>218</sup>                                                                                     | <u>Strength + range of motion vs range of motion only at 3 months</u><br>SMD -0.58 (-1.50, 0.34)                                                                               | <u>BASFI, BL / 3 months, mean (SD)</u><br>Strength + range of motion: 3.7 (3.3) / 1.9 (2.3)<br>Range of motion only: 3.5 (2.9) / 3.5 (3.1)                                      |                 | L          | L            | H/UC         | L             |
|                           | Rodriguez-Lozano (2013) [RCT] <sup>219</sup>                                                                          | <u>Exercise vs control, change BL-24 weeks</u><br>SMD -0.21 (-0.35, -0.07)                                                                                                     | <u>BASFI, change BL-24 weeks, mean (SD)†</u><br>Exercise: -0.54 (1.39)<br>Control: -0.21 (1.74)                                                                                 |                 | L          | L            | H/UC         | H/UC          |
|                           | Lim (2005) [RCT] <sup>220</sup>                                                                                       |                                                                                                                                                                                | <u>Functional capacity, % change BL-8 weeks</u><br>Exercise: 46%<br>Control: unchanged                                                                                          |                 | H/UC       | H/UC         | H/UC         | L             |
|                           | Analay (2003) [RCT] <sup>202</sup>                                                                                    | <u>Group vs home exercise</u><br>SMD -0.39 (-0.98, 0.20)                                                                                                                       | <u>BASFI, BL / 6 weeks / 3 months, mean (SD)</u><br>Group exercise: 26.34 (20.10) / 20.0 (16.76) / 22.0 (17.15)<br>Home exercise: 27.59 (17.82) / 27.31 (20.42) / 26.13 (17.20) |                 | H/UC       | L            | H/UC         | L             |
|                           | Sweeney (2002) [RCT] <sup>185</sup>                                                                                   | <u>Exercise vs control at 6 months</u><br>SMD -0.15 (-0.43, 0.13)                                                                                                              | <u>BASFI, BL / 6 months, mean (SD)</u><br>Exercise: 3.5 (2.4) / 3.06 (2.35)<br>Control: 3.6 (2.4) / 3.43 (2.61)                                                                 |                 | H/UC       | H/UC         | H/UC         | H/UC          |
|                           | Kraag (1990) [RCT] <sup>205</sup>                                                                                     | <u>Exercise vs control, change BL-4 months</u><br>SMD 1.68 (1.05, 2.31)                                                                                                        | <u>Toronto Activities of Daily Living, Change BL-4 months, mean (SD)</u><br>Exercise: 3.92 (2.94)<br>Control: -0.19 (1.86)                                                      |                 | H/UC       | H/UC         | H/UC         | H/UC          |
|                           | Bespoke meta-analysis:<br>Exercise vs control <sup>181;185;205;219</sup><br>Home vs group exercise <sup>198;202</sup> | <u>Exercise vs control</u><br>SMD -0.58 (-1.03, -0.12), I <sup>2</sup> 86.8%<br><u>Home exercise vs group</u><br>SMD 0.43 (-0.01, 0.87), I <sup>2</sup> 0% in favour of groups |                                                                                                                                                                                 |                 |            |              |              |               |

† SD calculated from 95% CI in paper; Alloc. Conc. = allocation concealment, AMSTAR2 = Assessing the Methodological Quality of Systematic Reviews, axSpA = axial spondyloarthritis, BASFI = Bath Ankylosing Spondylitis Functional Index, BL = baseline, Blind. Asses. = Blinded assessors, Blind. Part. = blinded participants, CI = confidence interval, H/UC = high / unclear risk of bias, L = low risk of bias, MD = mean difference Rand. Seq. = random sequence generation, RCT = randomised controlled trial, SD = standard deviation, SMD = standardised mean difference

Table – Home based exercises (axSpA), results and quality assessment

| Outcome (outcome measure) | Study (date) [study type]                     | Standardised result, SMD (95% CI) unless otherwise stated                                                                                                                | Natural result                                                                                                                                                                    | AMSTAR2 quality | Rand. Seq. | Alloc. Conc. | Blind. Part. | Blind. Asses. |
|---------------------------|-----------------------------------------------|--------------------------------------------------------------------------------------------------------------------------------------------------------------------------|-----------------------------------------------------------------------------------------------------------------------------------------------------------------------------------|-----------------|------------|--------------|--------------|---------------|
| Function                  | Yigit (2013) [NRT] <sup>221</sup>             | <u>Muscle strengthening exercise vs control</u><br>SMD -0.77 (-1.41, -0.12)                                                                                              | <u>BASFI, BL / 10 weeks</u><br>Muscle strengthening exercise: 3.22 (2.96) / 2.27 (2.10)<br>Control: 3.86 (2.36) / 4.00 (2.41)                                                     |                 |            |              |              |               |
|                           | Aytekin (2012) [NRT] <sup>207</sup>           | <u>Exercise ≥5x per week vs exercise &lt;5x per week at 3 months</u><br>SMD -0.43 (-0.92, 0.06)                                                                          | <u>BASFI, BL / 3 months</u><br>Exercise ≥5x per week: 2.54 (2.26) / 2.05 (2.14)<br>Exercise <5x per week: 2.90 (2.30) / 2.99 (2.26)                                               |                 |            |              |              |               |
|                           | Durmus (2009) [NRT] <sup>222</sup>            | <u>Muscle strengthening exercise vs control</u><br>SMD -0.89 (-1.53, -0.25)                                                                                              | <u>BASFI, BL / 12 weeks, mean (SD)</u><br>Muscle strengthening exercise: 2.22 (1.53) / 1.25 (1.07)<br>Control: 2.55 (1.40) / 2.30 (1.32)                                          |                 |            |              |              |               |
|                           | Durmus (2009) [NRT] <sup>223</sup>            | <u>Muscle strengthening exercise vs conventional exercises</u><br>SMD -0.38 (-1.02, 0.26)<br><u>Muscle strengthening exercise vs control</u><br>SMD -0.82 (-1.56, -0.09) | <u>BASFI, BL / 12 weeks</u><br>Muscle strengthening exercise: 2.65 (2.39) / 1.28 (1.47)<br>Conventional exercise: 3.18 (2.05) / 1.83 (1.41)<br>Control: 3.32 (2.59) / 2.97 (2.71) |                 |            |              |              |               |
|                           | Karapolat (2008) [NRT] <sup>224</sup>         | <u>Home exercise vs group exercise at 6 weeks</u><br>SMD -0.15 (-0.80, 0.49)                                                                                             | <u>BASFI, BL / 6 weeks, mean (SD)</u><br>Home exercise: 1.76 (1.67) / 1.76 (1.96)<br>Group exercise: 2.62 (2.15) / 2.05 (1.84)                                                    |                 |            |              |              |               |
|                           | Kraag (1994) [Single arm int.] <sup>212</sup> |                                                                                                                                                                          | <u>Toronto Activities of Daily Living, 4 months / 8 months</u><br>Original exercise group: 19.9 (3.9) / 2.3 (4.2)<br>Original control group: 16.6 (2.8) / 0.8 (2.4)               |                 |            |              |              |               |

Alloc. Conc. = allocation concealment, AMSTAR2 = Assessing the Methodological Quality of Systematic Reviews, axSpA = axial spondyloarthritis, BASFI = Bath Ankylosing Spondylitis Functional Index, Blind. Asses. = Blinded assessors, BL = baseline, Blind. Part. = blinded participants, CI = confidence interval, H/UC = high / unclear risk of bias, L = low risk of bias, NRT = non-randomised trial, Rand. Seq. = random sequence generation, RCT = randomised controlled trial, SD = standard deviation, SMD = standardised mean difference

Table – Home based exercises (axSpA), results and quality assessment

| Outcome (outcome measure) | Study (date) [study type]                              | Standardised result, SMD (95% CI) unless otherwise stated                                                                                                               | Natural result                                                                                                                                                                     | AMSTAR2 quality | Rand. Seq. | Alloc. Conc. | Blind. Part. | Blind. Asses. |
|---------------------------|--------------------------------------------------------|-------------------------------------------------------------------------------------------------------------------------------------------------------------------------|------------------------------------------------------------------------------------------------------------------------------------------------------------------------------------|-----------------|------------|--------------|--------------|---------------|
| Disease activity          | Liang (2015) [MA] <sup>192</sup>                       |                                                                                                                                                                         | <u>BASDAI, mean difference</u><br>MD -0.50 (-0.99, -0.02)                                                                                                                          | Moderate        |            |              |              |               |
|                           | O'Dwyer (2014) <sup>180</sup>                          |                                                                                                                                                                         | 1/2 studies reported significant difference in favour of group therapy for disease activity                                                                                        | Moderate        |            |              |              |               |
|                           | Aydin (2016) [RCT] <sup>198</sup>                      | <u>Home vs hospital based exercise at 8 weeks</u><br>SMD 0.52 (-0.14, 1.17)                                                                                             | <u>BASDAI, BL / 8 weeks, mean (SD)</u><br>Home based exercise: 5.02 (2.43) / 4.66 (2.02)<br>Hospital based exercise: 4.15 (1.79) / 3.66 (1.84)                                     |                 | L          | H/UC         | H/UC         | H/UC          |
|                           | Karahan (2016) [RCT] <sup>181</sup>                    | <u>Exercise vs control at 8 weeks</u><br>SMD -0.51 (-1.04, 0.02)                                                                                                        | <u>BASDAI, BL / 8 weeks, mean (SD)</u><br>Exercise: 4.1 (1.8) / 3.2 (1.3)<br>Control: 4.2 (2.1) / 4.1 (2.1)                                                                        |                 | H/UC       | L            | H/UC         | H/UC          |
|                           | Hsieh (2014) [RCT] <sup>218</sup>                      | <u>Strength + range of motion vs range of motion only at 3 months</u><br>SMD -0.32 (-1.23, 0.59)                                                                        | <u>BASDAI, BL / 3 months, mean (SD)</u><br>Strength + range of motion: 4.2 (1.9) / 3.7 (1.8)<br>Range of motion only: 4.5 (2.1) / 4.5 (3.0)                                        |                 | L          | L            | H/UC         | L             |
|                           | Rodriguez-Lozano (2013) [RCT] <sup>219</sup>           | <u>Exercise vs control, change BL-24 weeks</u><br>SMD -0.16 (-0.30, -0.02)                                                                                              | <u>BASDAI, change BL-24 weeks, mean (SD±)</u><br>Exercise: -0.65 (1.74)<br>Control: -0.37 (1.78)                                                                                   |                 | L          | L            | H/UC         | H/UC          |
|                           | Sweeney (2002) [RCT] <sup>185</sup>                    | <u>Exercise vs control at 6 months</u><br>SMD 0.08 (-0.20, 0.35)                                                                                                        | <u>BASDAI, BL / 6 months, mean (SD)</u><br>Exercise: 3.9 (2.4) / 3.65 (2.00)<br>Control: 3.8 (2.3) / 3.49 (2.16)                                                                   |                 | H/UC       | H/UC         | H/UC         | H/UC          |
|                           | Bespoke meta-analysis including <sup>181;185;219</sup> | <u>Exercise vs control</u><br>SMD -0.13 (-0.37, 0.10), I <sup>2</sup> 53.7%                                                                                             |                                                                                                                                                                                    |                 |            |              |              |               |
|                           | Yigit (2013) [NRT] <sup>221</sup>                      | <u>Muscle strengthening exercise vs control</u><br>SMD -0.55 (-1.19, 0.08)                                                                                              | <u>BASDAI, BL / 10 weeks</u><br>Muscle strengthening exercise: 3.85 (2.45) / 2.61 (1.83)<br>Control: 3.81 (2.38) / 3.77 (2.33)                                                     |                 |            |              |              |               |
|                           | Aytekin (2012) [NRT] <sup>207</sup>                    | <u>Exercise ≥5x per week vs exercise &lt;5x per week at 3 months</u><br>SMD -0.14 (-0.63, 0.34)                                                                         | <u>BASDAI, BL / 3 months</u><br>Exercise ≥5x per week: 4.44 (2.07) / 3.77 (1.98)<br>Exercise <5x per week: 3.98 (2.19) / 4.07 (2.21)                                               |                 |            |              |              |               |
|                           | Durmus (2009) [NRT] <sup>222</sup>                     | <u>Muscle strengthening exercise vs control</u><br>SMD -1.12 (-1.77, -0.47)                                                                                             | <u>BASDAI, BL / 12 weeks, mean (SD)</u><br>Muscle strengthening exercise: 2.52 (1.25) / 1.35 (0.78)<br>Control: 2.63 (1.07) / 2.34 (1.01)                                          |                 |            |              |              |               |
|                           | Durmus (2009) [NRT] <sup>223</sup>                     | <u>Muscle strengthening exercise vs conventional exercises</u><br>SMD -0.20 (-0.84, 0.44)<br><u>Muscle strengthening exercise vs control</u><br>SMD -0.66 (-1.38, 0.07) | <u>BASDAI, BL / 12 weeks</u><br>Muscle strengthening exercise: 2.73 (1.31) / 1.33 (0.88)<br>Conventional exercise: 2.96 (1.21) / 1.50 (0.83)<br>Control: 2.50 (1.31) / 2.08 (1.44) |                 |            |              |              |               |
|                           | Karapolat (2008) [NRT] <sup>224</sup>                  | <u>Home exercise vs group exercise at 6 weeks</u><br>SMD -0.27 (0.92, 0.38)                                                                                             | <u>BASDAI, BL / 6 weeks, mean (SD)</u><br>Home exercise: 3.03 (2.25) / 1.99 (1.50)<br>Group exercise: 3.30 (2.46) / 2.41 (1.62)                                                    |                 |            |              |              |               |

Alloc. Conc. = allocation concealment, AMSTAR2 = Assessing the Methodological Quality of Systematic Reviews, axSpA = axial spondyloarthritis, BASDAI = Bath Ankylosing Spondylitis Disease Activity Index, BL = baseline, Blind. Asses. = Blinded assessors, Blind. Part. = blinded participants, CI = confidence interval, H/UC = high / unclear risk of bias, L = low risk of bias, MD = mean difference, Rand. Seq. = random sequence generation, RCT = randomised controlled trial, SD = standard deviation, SMD = standardised mean difference,

Table – Home based exercises (axSpA), results and quality assessment

| Outcome (outcome measure) | Study (date) [study type]             | Standardised result, SMD (95% CI) unless otherwise stated                                      | Natural result                                                                                                                                                                             | AMSTAR2 quality | Rand. Seq. | Alloc. Conc. | Blind. Part. | Blind. Asses. |
|---------------------------|---------------------------------------|------------------------------------------------------------------------------------------------|--------------------------------------------------------------------------------------------------------------------------------------------------------------------------------------------|-----------------|------------|--------------|--------------|---------------|
| Stiffness                 | Analay (2003) [RCT] <sup>202</sup>    | <u>Group vs home exercise</u><br>SMD -0.33 (-0.92, 0.26)                                       | <u>Morning stiffness, BL / 6 weeks / 3 months, mean (SD)</u><br>Group exercise: 38.65 (60.32) / 20.87 (32.34) / 24.04 (36.24)<br>Home exercise: 36.59 (51.44) / 37 (62.01) / 35.54 (36.77) |                 | H/UC       | L            | H/UC         | L             |
|                           | Aytekin (2012) [NRT] <sup>207</sup>   | <u>Exercise ≥5x per week vs exercise &lt;5x per week at 3 months</u><br>SMD 0.01 (-0.47, 0.49) | <u>Morning stiffness, BL / 3 months</u><br>Exercise ≥5x per week: 55.15 (70.94) / 39.11 (65.86)<br>Exercise <5x per week: 32.66 (32.40) / 38.59 (34.43)                                    |                 |            |              |              |               |
| Spinal mobility           | Aydin (2016) [RCT] <sup>198</sup>     | <u>Home vs hospital based exercise at 8 weeks</u><br>SMD 0.57 (-0.09, 1.23)                    | <u>BASMI, BL / 8 weeks, mean (SD)</u><br>Home based exercise: 2.42 (1.50) / 2.52 (1.34)<br>Hospital based exercise: 2.38 (1.19) / 1.83 (1.04)                                              |                 | L          | H/UC         | H/UC         | H/UC          |
|                           | Yigit (2013) [NRT] <sup>221</sup>     | <u>Muscle strengthening exercise vs control</u><br>SMD -0.60 (-1.24, 0.03)                     | <u>BASMI, BL / 10 weeks</u><br>Muscle strengthening exercise: 5.05 (2.74) / 4.15 (2.62)<br>Control: 5.55 (2.50) / 5.70 (2.52)                                                              |                 |            |              |              |               |
|                           | Karapolat (2008) [NRT] <sup>224</sup> | <u>Home exercise vs group exercise at 6 weeks</u><br>SMD -0.53 (-1.19, 0.12)                   | <u>BASMI, BL / 6 weeks, mean (SD)</u><br>Home exercise: 3.06 (2.35) / 2.94 (2.35)<br>Group exercise: 4.77 (2.29) / 4.18 (2.30)                                                             |                 |            |              |              |               |

Alloc. Conc. = allocation concealment, AMSTAR2 = Assessing the Methodological Quality of Systematic Reviews, axSpA = axial spondyloarthritis, BASMI = Bath Ankylosing Spondylitis Metrology Index, BL = baseline, Blind. Asses. = Blinded assessors, Blind. Part. = blinded participants, CI = confidence interval, H/UC = high / unclear risk of bias, L = low risk of bias, Rand. Seq. = random sequence generation, RCT = randomised controlled trial, SD = standard deviation, SMD = standardised mean difference

Table – Home based exercises (axSpA), results and quality assessment

| Outcome (outcome measure) | Study (date) [study type]                          | Standardised result, SMD (95% CI) unless otherwise stated                                        | Natural result                                                                                                                                | AMSTAR2 quality | Rand. Seq. | Alloc. Conc. | Blind. Part. | Blind. Asses. |
|---------------------------|----------------------------------------------------|--------------------------------------------------------------------------------------------------|-----------------------------------------------------------------------------------------------------------------------------------------------|-----------------|------------|--------------|--------------|---------------|
| Patient global            | Aydin (2016) [RCT] <sup>198</sup>                  | <u>Home vs hospital based exercise at 8 weeks</u><br>SMD 0.18 (-0.46, 0.83)                      | <u>BAS-G, BL / 8 weeks, mean (SD)</u><br>Home based exercise: 5.10 (2.11) / 4.80 (1.67)<br>Hospital based exercise: 4.58 (1.88) / 4.45 (2.14) |                 | L          | H/UC         | H/UC         | H/UC          |
|                           | Hsieh (2014) [RCT] <sup>218</sup>                  | <u>Strength + range of motion vs range of motion only at 3 months</u><br>SMD -0.17 (-1.08, 0.73) | <u>BAS-G, BL / 3 months, mean (SD)</u><br>Strength + range of motion: 5.6 (2.7) / 3.6 (2.0)<br>Range of motion only: 5.0 (2.8) / 4.1 (3.5)    |                 | L          | L            | H/UC         | L             |
|                           | Rodriguez-Lozano (2013) [RCT] <sup>219</sup>       | <u>Exercise vs control, change BL-24 weeks</u><br>SMD -0.18 (-0.32, -0.03)                       | <u>Patients global VAS (0-10), change BL-24 weeks, mean (SD±)</u><br>Exercise: -0.75 (2.24)<br>Control: -0.36 (2.22)                          |                 | L          | L            | H/UC         | H/UC          |
|                           | Sweeney (2002) [RCT] <sup>185</sup>                | <u>Exercise vs control at 6 months</u><br>SMD -0.00 (-0.28, 0.27)                                | <u>BAS-G, BL / 6 months, mean (SD)</u><br>Exercise: 4.0 (2.6) / 3.60 (2.61)<br>Control: 3.7 (2.6) / 3.61 (2.81)                               |                 | H/UC       | H/UC         | H/UC         | H/UC          |
|                           | Bespoke meta-analysis including <sup>185;219</sup> | <u>Exercise vs control</u><br>SMD -0.13 (-0.28, 0.01), I <sup>2</sup> 13.6%                      |                                                                                                                                               |                 |            |              |              |               |
| Quality of life           | Aydin (2016) [RCT] <sup>198</sup>                  | <u>Home vs hospital based exercise at 8 weeks</u><br>SMD 0.58 (-0.08, 1.23)                      | <u>ASQOL, BL / 8 weeks, mean (SD)</u><br>Home based exercise: 9.63 (5.41) / 9.00 (5.06)<br>Hospital based exercise: 7.11 (4.33) / 6.22 (4.59) |                 | L          | H/UC         | H/UC         | H/UC          |
|                           | Karahan (2016) [RCT] <sup>181</sup>                | <u>Exercise vs control at 8 weeks</u><br>SMD -0.64 (-1.17, -0.11)                                | <u>ASQOL, BL / 8 weeks, mean (SD)</u><br>Exercise: 9.5 (6.1) / 6.8 (4.3)<br>Control: 10.2 (6.0) / 10.3 (6.4)                                  |                 | H/UC       | L            | H/UC         | H/UC          |
|                           | Rodriguez-Lozano (2013) [RCT] <sup>219</sup>       | <u>Exercise vs control, change BL-24 weeks</u><br>SMD -0.25 (-0.39, -0.11)                       | <u>ASQOL, change BL-24 weeks, mean (SD±)</u><br>Exercise: -0.98 (3.04)<br>Control: -0.23 (3.01)                                               |                 | L          | L            | H/UC         | H/UC          |
|                           | Bespoke meta-analysis including <sup>181;219</sup> | <u>Exercise vs control</u><br>SMD -0.36 (-0.70, -0.01), I <sup>2</sup> 48.4%                     |                                                                                                                                               |                 |            |              |              |               |
|                           | Aytekin (2012) [NRT] <sup>207</sup>                | <u>Exercise ≥5x per week vs exercise &lt;5x per week at 3 months</u><br>SMD -0.50 (-0.99, -0.01) | <u>ASQOL, BL / 3 months</u><br>Exercise ≥5x per week: 9.56 (5.21) / 7.29 (4.6)<br>Exercise <5x per week: 9.34 (5.97) / 9.96 (6.1)             |                 |            |              |              |               |

‡ SD calculated from 95% CI in paper

Alloc. Conc. = allocation concealment, AMSTAR2 = Assessing the Methodological Quality of Systematic Reviews, BL = baseline, Blind. Asses. = Blinded assessors, Blind. Part. = blinded participants, CI = confidence interval, H/UC = high / unclear risk of bias, L = low risk of bias, Rand. Seq. = random sequence generation, RCT = randomised controlled trial, SD = standard deviation, SMD = standardised mean difference

Table – Home based exercises (axSpA), results and quality assessment

| Outcome (outcome measure) | Study (date) [study type]             | Standardised result, SMD (95% CI) unless otherwise stated                   | Natural result                                                                                                                                 | AMSTAR2 quality | Rand. Seq. | Alloc. Conc. | Blind. Part. | Blind. Asses. |
|---------------------------|---------------------------------------|-----------------------------------------------------------------------------|------------------------------------------------------------------------------------------------------------------------------------------------|-----------------|------------|--------------|--------------|---------------|
| Fatigue                   | Yigit (2013) [NRT] <sup>221</sup>     | <u>Muscle strengthening exercise vs control</u><br>SMD -0.68 (-1.32, -0.04) | <u>MAF, BL / 10 weeks</u><br>Muscle strengthening exercise: 21.48 (12.62) / 15.95 (11.52)<br>Control: 24.85 (13.60) / 24.42 (13.38)            |                 |            |              |              |               |
|                           | Durmus (2009) [NRT] <sup>222</sup>    | <u>Muscle strengthening exercise vs control</u><br>SMD -0.45 (-1.06, 0.16)  | <u>MAF, BL / 12 weeks, mean (SD)</u><br>Muscle strengthening exercise: 2.07 (0.77) / 1.30 (1.08)<br>Control: 2.02 (0.76) / 1.73 (0.74)         |                 | H/UC       | H/UC         | H/UC         | H/UC          |
|                           | Karapolat (2008) [NRT] <sup>224</sup> | <u>Home exercise vs group exercise at 6 weeks</u><br>SMD 0.21 (-0.44, 0.85) | <u>NHP - fatigue, BL / 6 weeks, mean (SD)</u><br>Home exercise: 41.41 (33.20) / 32.10 (26.14)<br>Group exercise: 36.05 (28.75) / 26.64 (26.20) |                 |            |              |              |               |

Alloc. Conc. = allocation concealment, AMSTAR2 = Assessing the Methodological Quality of Systematic Reviews, axSpA = axial spondyloarthritis, BL = baseline, Blind. Asses. = Blinded assessors, Blind. Part. = blinded participants, CI = confidence interval, H/UC = high / unclear risk of bias, L = low risk of bias, MAF = Multidimensional Assessment of Fatigue, NRT = non-randomised trial, MD = mean difference, NHP = Nottingham Health Profile, Rand. Seq. = random sequence generation, RCT = randomised controlled trial, SD = standard deviation, SMD = standardised mean difference

Table – Home based exercises (axSpA), results and quality assessment

| Outcome (outcome measure) | Study (date) [study type]                                        | Standardised result, SMD (95% CI) unless otherwise stated                                                   | Natural result                                                                                                                                                      | AMSTAR2 quality | Rand. Seq. | Alloc. Conc. | Blind. Part. | Blind. Asses. |
|---------------------------|------------------------------------------------------------------|-------------------------------------------------------------------------------------------------------------|---------------------------------------------------------------------------------------------------------------------------------------------------------------------|-----------------|------------|--------------|--------------|---------------|
| Anxiety                   | Aydin (2016) [RCT] <sup>198</sup>                                | <u>Home vs hospital based exercise at 8 weeks</u><br>SMD 0.55 (-0.11, 1.21)                                 | <u>HADS - anxiety, BL / 8 weeks, mean (SD)</u><br>Home based exercise: 8.84 (4.08) / 8.63 (4.23)<br>Hospital based exercise: 8.22 (4.90) / 6.50 (3.45)              |                 | L          | H/UC         | H/UC         | H/UC          |
| Depression                | Liang (2015) [MA] <sup>192</sup>                                 |                                                                                                             | <u>Depression, mean difference</u><br>MD -2.31 (-3.33, -1.30)                                                                                                       | Moderate        |            |              |              |               |
|                           | Aydin (2016) [RCT] <sup>198</sup>                                | <u>Home vs hospital based exercise at 8 weeks</u><br>SMD 0.65 (-0.01, 1.32)                                 | <u>HADS - depression, BL / 8 weeks, mean (SD)</u><br>Home based exercise: 9.21 (4.57) / 9.47 (5.61)<br>Hospital based exercise: 7.66 (4.25) / 6.38 (3.58)           |                 | L          | H/UC         | H/UC         | H/UC          |
|                           | Lim (2005) [RCT] <sup>220</sup>                                  |                                                                                                             | <u>Depression, % change BL-8 weeks</u><br>Exercise: -31%<br>Control: 19%                                                                                            |                 | H/UC       | H/UC         | H/UC         | L             |
|                           | Analay (2003) [RCT] <sup>202</sup>                               | <u>Group vs home exercise</u><br>SMD -0.38 (-0.97, 0.21)                                                    | <u>BDI, BL / 6 weeks / 3 months, mean (SD)</u><br>Group exercise: 5.52 (4.56) / 3.95 (3.21) / 5.13 (6.34)<br>Home exercise: 6.31 (4.72) / 5.90 (6.62) / 6.77 (6.41) |                 | H/UC       | L            | H/UC         | L             |
|                           | Bespoke meta-analysis: Home vs group exercise <sup>198,202</sup> | <u>Home vs group exercise</u><br>SMD 0.43 (-0.01, 0.87), I <sup>2</sup> 0% in favour of group interventions |                                                                                                                                                                     |                 |            |              |              |               |
|                           | Yigit (2013) [NRT] <sup>221</sup>                                | <u>Muscle strengthening exercise vs control</u><br>SMD -0.59 (-1.22, 0.05)                                  | <u>BDI, BL / 10 weeks</u><br>Muscle strengthening exercise: 8.30 (7.27) / 5.75 (6.03)<br>Control: 11.15 (10.45) / 10.7 (10.33)                                      |                 |            |              |              |               |
|                           | Durmus (2009) [NRT] <sup>222</sup>                               | <u>Muscle strengthening exercise vs control</u><br>SMD -1.71 (-2.42, -1.00)                                 | <u>BDI, BL / 12 weeks, mean (SD)</u><br>Muscle strengthening exercise: 9.24 (3.17) / 3.16 (2.07)<br>Control: 9.88 (3.35) / 7.05 (2.53)                              |                 |            |              |              |               |
|                           | Karapolat (2008) [NRT] <sup>224</sup>                            | <u>Home exercise vs group exercise at 6 weeks</u><br>SMD 0.11 (-0.53, 0.76)                                 | <u>BDI, BL / 6 weeks, mean (SD)</u><br>Home exercise: 8.5 (5.3) / 8.5 (6.0)<br>Group exercise: 8.0 (5.8) / 7.8 (6.4)                                                |                 |            |              |              |               |

Alloc. Conc. = allocation concealment, AMSTAR2 = Assessing the Methodological Quality of Systematic Reviews, axSpA = axial spondyloarthritis, BDI = Beck Depression Inventory, BL = baseline, Blind. Asses. = Blinded assessors, Blind. Part. = blinded participants, CI = confidence interval, H/UC = high / unclear risk of bias, L = low risk of bias, Rand. Seq. = random sequence generation, RCT = randomised controlled trial, SD = standard deviation, SMD = standardised mean difference

Table – Home based exercises (axSpA), results and quality assessment

| Outcome (outcome measure) | Study (date) [study type]                     | Standardised result, SMD (95% CI) unless otherwise stated                                                                                                             | Natural result                                                                                                                                                                                           | AMSTAR2 quality | Rand. Seq. | Alloc. Conc. | Blind. Part. | Blind. Asses. |
|---------------------------|-----------------------------------------------|-----------------------------------------------------------------------------------------------------------------------------------------------------------------------|----------------------------------------------------------------------------------------------------------------------------------------------------------------------------------------------------------|-----------------|------------|--------------|--------------|---------------|
| Self-efficacy             | Liang (2015) [MA] <sup>192</sup>              | <u>Exercise vs control</u><br>SMD 0.07 (-0.25, 0.38)                                                                                                                  |                                                                                                                                                                                                          | Moderate        |            |              |              |               |
|                           | Sweeney (2002) [RCT] <sup>185</sup>           | <u>Exercise vs control at 6 months</u><br>SMD 0.48 (0.20, 0.77)                                                                                                       | Stanford self-efficacy - pain, BL / 6 months, mean (SD)<br>Exercise: 6.49 (1.8) / 6.80 (1.21)<br>Control: 6.06 (2.1) / 6.24 (1.1)                                                                        |                 | H/UC       | H/UC         | H/UC         | H/UC          |
| CRP                       | Aydin (2016) [RCT] <sup>198</sup>             | <u>Home vs hospital based exercise at 8 weeks</u><br>SMD -0.48 (-1.14, 0.17)                                                                                          | <u>CRP, BL / 8 weeks, mean (SD)</u><br>Home based exercise: 0.44 (0.54) / 0.32 (0.30)<br>Hospital based exercise: 1.25 (2.80) / 0.90 (1.69)                                                              |                 | L          | H/UC         | H/UC         | H/UC          |
|                           | Hsieh (2014) [RCT] <sup>218</sup>             | <u>Strength + range of motion vs range of motion only at 3 months</u><br>SMD -0.14 (-1.04, 0.77)                                                                      | <u>CRP, BL / 3 months, mean (SD)</u><br>Strength + range of motion: 1.27 (1.10) / 0.79 (0.56)<br>Range of motion only: 1.07 (1.24) / 0.9 (0.99)                                                          |                 | L          | L            | H/UC         | L             |
| ESR                       | Aydin (2016) [RCT] <sup>198</sup>             | <u>Home vs hospital based exercise, change BL-4 weeks</u><br>SMD -0.69 (-1.35, -0.02)                                                                                 | <u>ESR, BL / 8 weeks, mean (SD)</u><br>Home based exercise: 21.52 (12.98) / 17.47 (8.59)<br>Hospital based exercise: 30.38 (21.74) / 26.38 (16.42)                                                       |                 | L          | H/UC         | H/UC         | H/UC          |
|                           | Hsieh (2014) [RCT] <sup>218</sup>             | <u>Strength + range of motion vs range of motion only at 3 months</u><br>SMD -0.01 (-0.91, 0.89)                                                                      | <u>ESR, BL / 3 months, mean (SD)</u><br>Strength + range of motion: 36.8 (28.6) / 24.8 (12.0)<br>Range of motion only: 24.7 (23.1) / 25.0 (28.3)                                                         |                 | L          | L            | H/UC         | L             |
| Walk test                 | Durmus (2009) [NRT] <sup>223</sup>            | <u>Muscle strengthening exercise vs conventional exercises</u><br>SMD -0.06 (-0.69, 0.58)<br><u>Muscle strengthening exercise vs control</u><br>SMD 0.88 (0.14, 1.62) | <u>6 minute walk distance, BL / 12 weeks</u><br>Muscle strengthening exercise: 555.8 (91.0) / 620.4 (87.6)<br>Conventional exercise: 548.8 (82.4) / 625.0 (74.9)<br>Control: 537.4 (90.4) / 539.2 (99.9) |                 |            |              |              |               |
| Grip strength             | Hsieh (2014) [RCT] <sup>218</sup>             | <u>Strength + range of motion vs range of motion only at 3 months</u><br>SMD -0.06 (-0.96, 0.84)                                                                      | <u>Grip strength, BL / 3 months, mean (SD)</u><br>Strength + range of motion: 28.6 (11.0) / 30.5 (12.0)<br>Range of motion only: 29.5 (10.7) / 31.1 (9.2)                                                |                 | L          | L            | H/UC         | L             |
| Spinal flexion            | Kraag (1990) [RCT] <sup>205</sup>             | <u>Exercise vs control, change BL-4 months</u><br>SMD 0.04 (-0.50, 0.57)                                                                                              | <u>Schober, Change BL-4 months, mean (SD)</u><br>Exercise: -2.4 (6.7)<br>Control: -2.7 (9.9)                                                                                                             |                 | H/UC       | H/UC         | H/UC         | H/UC          |
|                           | Kraag (1994) [Single arm int.] <sup>212</sup> |                                                                                                                                                                       | <u>Pain, 4 months / 8 months</u><br>Original exercise group: 13.4 (1.6) / 13.7 (1.5)<br>Original control group: 13.1 (1.5) / 13.2 (1.3)                                                                  |                 |            |              |              |               |

Alloc. Conc. = allocation concealment, AMSTAR2 = Assessing the Methodological Quality of Systematic Reviews, axSpA = axial spondyloarthritis, BL = baseline, Blind. Asses. = Blinded assessors, Blind. Part. = blinded participants, CI = confidence interval, CRP = C-reactive protein, ESR = erythrocyte sedimentation rate, H/UC = high / unclear risk of bias, L = low risk of bias, Rand. Seq. = random sequence generation, RCT = randomised controlled trial, SD = standard deviation, SMD = standardised mean difference



*Table – Home exercises (axSpA), SF36 results at final follow-up, mean (SD)*

| Author (date)                           | PCS | MCS | GH            | PF            | RP            | RE            | SF            | BP            | V             | MH            |
|-----------------------------------------|-----|-----|---------------|---------------|---------------|---------------|---------------|---------------|---------------|---------------|
| Yigit (2013) [Exercise] <sup>221</sup>  |     |     | 71.45 (15.93) | 73.50 (18.93) | 85.00 (32.85) | 84.99 (27.53) | 90.00 (22.43) | 73.35 (17.21) | 70.00 (16.86) | 83.00 (12.03) |
| Yigit (2013) [Control] <sup>221</sup>   |     |     | 52.80 (23.36) | 59.50 (25.95) | 61.15 (39.30) | 68.81 (30.41) | 65.58 (31.71) | 54.30 (27.49) | 54.25 (21.11) | 68.2 (19.05)  |
| Durmus (2009) [Exercise] <sup>222</sup> |     |     | 0.72 (0.13)   | 0.86 (0.14)   | 0.77 (0.26)   | 0.80 (0.21)   | 0.81 (0.20)   | 0.78 (0.12)   | 0.80 (0.08)   | 0.80 (0.10)   |
| Durmus (2009) [Control] <sup>222</sup>  |     |     | 0.66 (0.19)   | 0.68 (0.20)   | 0.67 (0.22)   | 0.68 (0.62)   | 0.72 (0.19)   | 0.69 (0.18)   | 0.68 (0.21)   | 0.68 (0.18)   |

axSpA = axial spondyloarthritis, BP = bodily pain, GH = general health, MCS = mental component score, MH = mental health, PCS = physical component score, PF = physical function, RE = role emotional, RP = role physical, SD = standard deviation, SF = social functioning, V = vitality

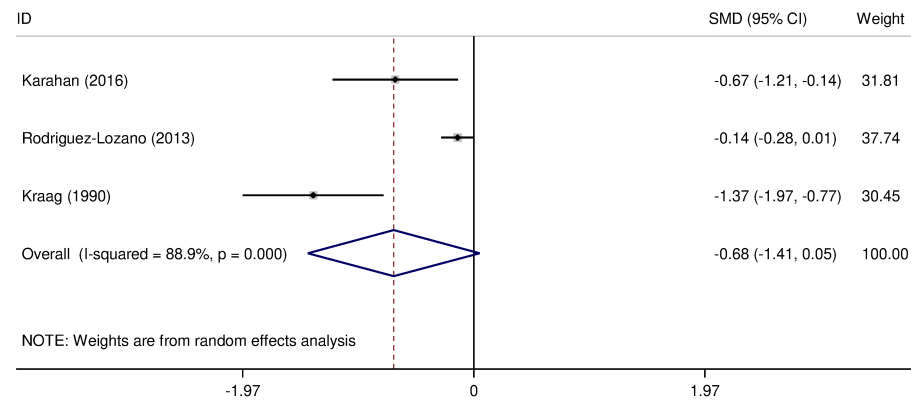

Figure – Comparing home exercise and controls in terms of pain (axSpA)

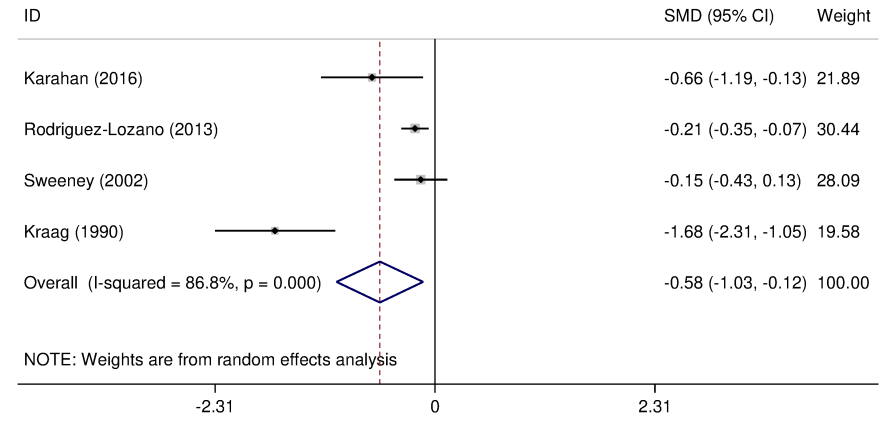

Figure – Comparing home exercise and controls in terms of function (axSpA)

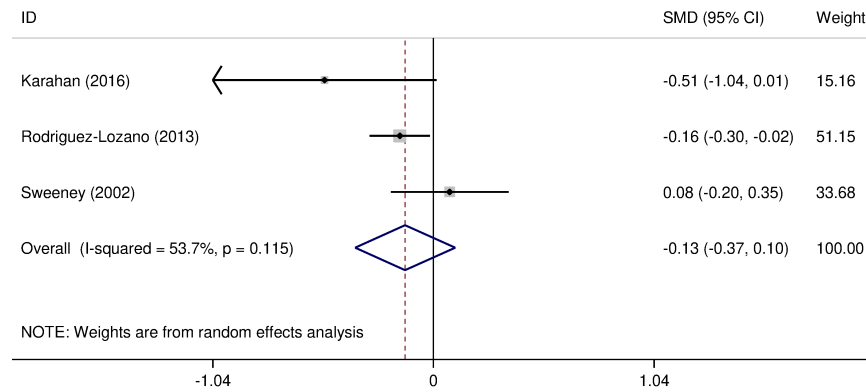

Figure – Comparing home exercise and controls in terms of disease activity (axSpA)

## Supplementary table 73 – Description of original studies of muscle strengthening exercise in axSpA

Table – Muscle strengthening exercises (axSpA), description of included studies

| Author (date) [country]                        | Study design | Inclusion criteria                                                                                                                                                                                                                                                                                                                                                                                                                                                                                          | Exposure detail                                                                                                                                                                                                                     | N                         | Age years, mean (SD)                                | N (%) female                  | Funders                                                        |
|------------------------------------------------|--------------|-------------------------------------------------------------------------------------------------------------------------------------------------------------------------------------------------------------------------------------------------------------------------------------------------------------------------------------------------------------------------------------------------------------------------------------------------------------------------------------------------------------|-------------------------------------------------------------------------------------------------------------------------------------------------------------------------------------------------------------------------------------|---------------------------|-----------------------------------------------------|-------------------------------|----------------------------------------------------------------|
| de Souza (2017) [Brazil] <sup>225</sup>        | RCT          | Modified New York criteria, aged 18-60 years, established diagnosis of AS, functional class I-II, stable DMARD dose for 3 months, stable NSAIDs / steroids for 4 months<br>Exclusions: hypertension, history of coronary artery disease, syncope or arrhythmia due to exercise, diabetes, severe psychiatric disorders, fibromyalgia, more disabling condition than AS, history of regular exercise $\geq 30$ mins for $\geq 2$ x per week in past 3 months, conditions preventing patients from exercising | 1) Swiss ball training in groups with a physiotherapist<br>p) Usual care                                                                                                                                                            | 1) 30<br>p) 30            | 1) 45 (9.8)<br>p) 43.8 (10.2)                       | 1) 7 (23.3)<br>p) 9 (30.0)    | <b>Government</b> (São Paulo Research Foundation)              |
| Kasapoglu Aksoy (2017) [Turkey] <sup>226</sup> | RCT          | Modified New York criteria, No biologic treatment, necessary social and cognitive competence to be able to adjust to program<br>Exclusions: systemic disorder (cardiac, liver, kidney, blood disease), difficulty in co-operation                                                                                                                                                                                                                                                                           | 1) 5 day education program alongside stretching exercises<br>p) Routine care                                                                                                                                                        | 1) 20<br>p) 21            | 1) 38.0 (9.8)<br>p) 37.5 (11.1)                     | 1) 5 (25.0)<br>p) 4 (19.0)    | <b>Not reported</b> – authors declared no conflict of interest |
| Rosu (2015) [Romania] <sup>227</sup>           | RCT          | Modified New York criteria, early stage AS, radiological sacroiliitis grade $\geq 2$ without spinal involvement, clinically stable disease, no history of significant cardiovascular or respiratory comorbidity                                                                                                                                                                                                                                                                                             | 1) McKenzie group – promote posture education, back stretching, respiratory re-education, pelvic stabilisation<br>2) Classic kinetic program – stretching and strengthening exercises to maintain function range or motion in spine | 1) 26<br>2) 24            | 1) 25.1 (4.0)<br>p) 23.0 (3.7)                      | 1) 4 (15.4)<br>2) 3 (12.5)    | <b>Not reported</b> – authors declared no conflict of interest |
| Hsieh (2014) [Taiwan] <sup>218</sup>           | RCT          | Modified New York criteria, aged 20-65 years, well controlled disease, symptom duration >6 months<br>Exclusions: presence of serious medical conditions or acute febrile disorders, history of arthroplasties or major operations in the knee or hip joint, severe arthritis or contracture of knee or hip joints which preclude exercise                                                                                                                                                                   | 1) Range of motion and strengthening exercises at home<br>2) Range of motion only at home                                                                                                                                           | 1) 9<br>2) 10             | 1) 36.2 (11.7)<br>2) 42.1 (8.8)                     | 1) 3 (33.3)<br>2) 3 (30.0)    | <b>Government</b> (Taiwan National Science Council)            |
| Masiero (2014) [Italy] <sup>228</sup>          | RCT          | 12 month follow-up of Masiero et al (2011) <sup>229</sup>                                                                                                                                                                                                                                                                                                                                                                                                                                                   | 12 month follow-up of Masiero et al (2011) <sup>229</sup>                                                                                                                                                                           | 1) 21<br>p1) 22<br>p1) 21 | 1) 49.1 (11.8)<br>p1) 43.9 (8.1)<br>p2) 46.2 (10.3) | 1) 20%<br>p1) 5%<br>p2) 19.1% | <b>No funding</b>                                              |

axSpA = axial spondyloarthritis, DMARD = disease modifying anti-rheumatic drug, N = number, NSAIDs = non-steroidal anti-inflammatory drugs, RCT = randomised controlled trial, SD = standard deviation inhibitors,

Table – Muscle strengthening exercises (axSpA), description of included studies

| Author (date)<br>[country]                              | Study design | Inclusion criteria                                                                                                                                                                                                                                                                                                                                                                                                                  | Exposure detail                                                                                                                                                                                                   | N                         | Age years,<br>mean (SD)                                                                | N (%) female                                | Funders                                                            |
|---------------------------------------------------------|--------------|-------------------------------------------------------------------------------------------------------------------------------------------------------------------------------------------------------------------------------------------------------------------------------------------------------------------------------------------------------------------------------------------------------------------------------------|-------------------------------------------------------------------------------------------------------------------------------------------------------------------------------------------------------------------|---------------------------|----------------------------------------------------------------------------------------|---------------------------------------------|--------------------------------------------------------------------|
| Altan (2012)<br>[Turkey] <sup>230</sup>                 | RCT          | AS modified New York Criteria<br>Exclusions: active peripheral arthritis, total spinal ankyloses, ESR over 50mm/h or CRP >10x normal value, treatment regime that has changed in past two months                                                                                                                                                                                                                                    | 1) Pilates, 1 hour 3x per week<br>p) Usual care                                                                                                                                                                   | 1) 29<br>p) 24            | 1) 46.5 (11.2)<br>p) 43.6 (10.1)                                                       | 25 (47.2)                                   | <b>Not reported</b> –<br>Authors declared no conflicts of interest |
| Masiero (2011)<br>[Italy] <sup>229</sup>                | RCT          | New York criteria, treated with TNFi, did not require continuous NSAIDs, stable clinical picture (no change in BASDAI of more than 1/10 units in previous 3 months), aged 18-65 years, did not have severe disability presented no other osteoarticular disease.<br>Exclusions: Complete ankyloses of the spine, participation in rehabilitation treatment in previous 6 months, variations in standard biological therapy regimens | 1) Educational behavioural program with exercise – Exercises included flexibility and strengthening exercises<br>p1) Educational program only<br>p2) No exercise control                                          | 1) 20<br>p1) 20<br>p2) 22 | Median (IQR)<br>1) 47.5 (37.2, 61.5)<br>p1) 44.0 (38.2, 52.5)<br>p2) 47.5 (40.7, 52.5) | 1) 5 (25.0)<br>p1) 4 (20.0)<br>p2) 4 (18.2) | <b>Not reported</b>                                                |
| Fernandez-de-las-Penas (2006)<br>[Spain] <sup>231</sup> | RCT          | New York criteria<br>Exclusions: medical condition that impaired function more than AS, osteoporosis, or a history of fractures secondary to osteoporosis                                                                                                                                                                                                                                                                           | 1) Strengthening and flexibility exercises using the Global Posture Re-education Method<br>2) Conventional exercise - Stretching and strengthening spine                                                          | 1) 20<br>2) 20            | 1) 45 (9)<br>2) 46 (8)                                                                 | 1) 5 (25.0)<br>2) 4 (20.0)                  | <b>Not reported</b>                                                |
| Fernandez-de-las-Penas (2005)<br>[Spain] <sup>232</sup> | RCT          | New York criteria<br>Exclusions: medical condition that impaired function more than AS, osteoporosis, or a history of fractures secondary to osteoporosis                                                                                                                                                                                                                                                                           | 1) Strengthening and flexibility exercises using the Global Posture Re-education Method<br>2) Conventional exercise - Stretching and strengthening spine                                                          | 1) 20<br>2) 20            | 1) 45 (9)<br>2) 46 (8)                                                                 | 1) 5 (25.0)<br>2) 4 (20.0)                  | <b>Not reported</b>                                                |
| Lim (2005)<br>[South Korea] <sup>220</sup>              | RCT          | Outpatient without complications, sedentary, understands questionnaires, no changes in medications, functional class II                                                                                                                                                                                                                                                                                                             | 1) Home based exercise program – muscle relaxation, flexibility, muscular strength, breathing and posture.<br>p) Waitlist control                                                                                 | 1) 25<br>p) 25            | 1) 38.8 (9.3)<br>p) 28.1 (7.5)                                                         | 1) 6 (24.0)<br>p) 5 (20.0)                  | <b>Not reported</b>                                                |
| Yigit (2013)<br>[Turkey] <sup>221</sup>                 | NRT          | Aged 18-65 years, Modified New York Criteria, Received TNFi for ≥3 months, understand context of program<br>Exclusions: Severe comorbidities affecting heart, lung, liver or kidneys, mental retardation, presence of severe arthritis or prosthetic device and exercising regularly in past 6 months                                                                                                                               | 1) Home based exercise program – 5x per week, muscle relaxation, flexibility, range of motion and strengthening exercises as well as exercises to improve posture<br>p) Group who did not do the exercise program | 1) 20<br>p) 20            | 1) 40.3 (8.1)<br>p) 36.5 (7.2)                                                         | 1) 5 (25.0)<br>p) 3 (15.0)                  | <b>Not reported</b> –<br>authors declared no conflict of interest  |

axSpA = axial spondyloarthritis, BASDAI = Bath Ankylosing Spondylitis Disease Activity Index, ESR = erythrocyte sedimentation rate, N = number, NRT = non-randomised trial, NSAIDs = non-steroidal anti-inflammatory drugs, RCT = randomised controlled trial, SD = standard deviation, TNFi = tumour necrosis factor inhibitors,

Table – Muscle strengthening exercises (axSpA), description of included studies

| Author (date) [country]                         | Study design    | Inclusion criteria                                                                                                                                                                                                                    | Exposure detail                                                                                                                                                                                                                                                                                       | N                       | Age years, mean (SD)                             | N (%) female                             | Funders                                                                                            |
|-------------------------------------------------|-----------------|---------------------------------------------------------------------------------------------------------------------------------------------------------------------------------------------------------------------------------------|-------------------------------------------------------------------------------------------------------------------------------------------------------------------------------------------------------------------------------------------------------------------------------------------------------|-------------------------|--------------------------------------------------|------------------------------------------|----------------------------------------------------------------------------------------------------|
| Durmus (2009) [Turkey] <sup>222</sup>           | NRT             | New York criteria, not been practicing regular exercise during previous 6 months, able to understand content of questionnaire / experimental schedules, no co-existent systemic diseases, not been given TNFi, functional class I-III | 1) Home based exercise program – 7 days per week, 20 exercises for muscle relaxation, strength stronger breathing and straighter posture<br>p) Non-exercise control                                                                                                                                   | 1) 25<br>p) 18          | 1) 37.3 (7.3)<br>p) 42.3 (8.2)                   | 1) 4 (16.0)<br>p) 4 (22.2)               | <b>Not reported</b> – authors declared no conflict of interest                                     |
| Durmus (2009) [Turkey] <sup>223</sup>           | NRT             | New York criteria, sedentary<br>Exclusions: Medical condition that impaired function more than AS, those with co-existent cardiac or respiratory diseases, severe arthritis, taking TNFi                                              | 1) "Global Posture Re-education" - Muscle chains are shortened and then stretched and strengthened. Includes dynamic axial exercise, static posture exercise, stretching.<br>2) Conventional exercises – motion and flexibility<br>p) Non-exercise control                                            | 1) 19<br>2) 19<br>p) 13 | 1) 38.1 (11.1)<br>2) 35.9 (7.3)<br>p) 43.5 (7.3) | 1) 5 (26.3)<br>2) 2 (10.5)<br>p) 1 (7.7) | <b>Not reported</b>                                                                                |
| Gyurcsik (2012) [Hungary] <sup>233</sup>        | Single arm int. | Modified New York Criteria                                                                                                                                                                                                            | Physical activity – 1.5 hours general posture re-educatoin, manual mobilization of the spine, pelvic-, upper-, and lower extremity exercises, stretching of the shortened muscles (mainly back, lumbar spine, hips, and shoulders) with joint prevention strategies, as well as functional exercises. | 10                      | 54.8 (14.9)                                      | 5 (50.0)                                 | <b>Government</b> (Hungarian Medical Research Council), <b>University</b> (University of Debrecen) |
| Hulejova (2012) [Czech Republic] <sup>234</sup> | Single arm int. | Modified New York Criteria                                                                                                                                                                                                            | Physiotherapy – 45 mins 2x per week. Group based exercise consisting of stretching and muscle strengthening exercise and educated about home exercise                                                                                                                                                 | 26                      | Median (IQR)<br>36 (22, 48)                      | 8 (30.8)                                 | MH CR & MSM [sic]                                                                                  |
| Ortancil (2009) [Turkey] <sup>235</sup>         | Single arm int. | Modified New York Criteria<br>Exclusions: cardiac and respiratory disease and significant pain in the hip, knee, ankle and feet                                                                                                       | Breathing exercises and upper extremity exercises                                                                                                                                                                                                                                                     | 22                      | 42.4 (9.9)                                       | 5 (22.7)                                 | <b>Not reported</b>                                                                                |

axSpA = axial spondyloarthritis, N = number, NRT = non-randomised trial, RCT = randomised controlled trial, SD = standard deviation, TNFi = tumour necrosis factor inhibitors

## Supplementary table 74 – Results from reviews and interventional studies of muscle strengthening exercise in axSpA

Table – Muscle strengthening exercises (axSpA), results and quality assessment

| Outcome (outcome measure) | Study (date) [study type]                          | Standardised result, SMD (95% CI) unless otherwise stated                                                                                                                                                                                                                        | Natural result                                                                                                                                                                                                                                                                                                                                                               | AMSTAR2 quality | Rand. Seq. | Alloc. Conc. | Blind. Part. | Blind. Asses. |
|---------------------------|----------------------------------------------------|----------------------------------------------------------------------------------------------------------------------------------------------------------------------------------------------------------------------------------------------------------------------------------|------------------------------------------------------------------------------------------------------------------------------------------------------------------------------------------------------------------------------------------------------------------------------------------------------------------------------------------------------------------------------|-----------------|------------|--------------|--------------|---------------|
| Pain                      | Rosu (2015) [RCT] <sup>227</sup>                   | <u>McKenzie program vs classic kinetic exercises at 24 weeks</u><br>SMD -2.25 (-2.97, -1.54)                                                                                                                                                                                     | <u>Pain VAS, BL / 24 weeks, mean (SD)</u><br>McKenzie: 32.31 (10.83) / 14.62 (5.82)<br>Classic Kinetic: 30.83 (10.60) / 28.33 (6.37)                                                                                                                                                                                                                                         |                 | H/UC       | H/UC         | H/UC         | H/UC          |
|                           | Masiero (2014) [RCT] <sup>228</sup>                | <u>Exercise + education vs education at 6 months</u><br>Cervical pain: SMD -0.52 (-1.13, 0.09)<br>Lumbar pain: SMD -0.73 (-1.35, -0.10)<br><u>Exercise + education vs control at 6 months</u><br>Cervical pain: SMD -0.58 (-1.19, 0.04)<br>Lumbar pain: SMD -0.37 (-0.98, 0.25)  | <u>Pain VAS – cervical BL / 12 months, mean (SD)</u><br>Exercise + education: 33.3 (22.4) / 8.1 (8.9)<br>Education: 22.4 (26.0) / 12.5 (8.0)<br>Control: 33.7 (26.1) / 20.6 (22.7)<br><u>Pain VAS – lumbar BL / 12 months, mean (SD)</u><br>Exercise + education: 35.0 (25.0) / 11.6 (15.8)<br>Education: 29.5 (29.2) / 26.7 (33.3)<br>Control: 26.5 (24.1) / 18.4 (21.1)    |                 | L          | L            | H/UC         | L             |
|                           | Masiero (2011) [RCT] <sup>229</sup>                | <u>Exercise + education vs education at 6 months</u><br>Cervical pain: SMD -0.45 (-1.08, 0.18)<br>Lumbar pain: SMD -0.47 (-1.10, 0.16)<br><u>Exercise + education vs control at 6 months</u><br>Cervical pain: SMD -1.53 (-2.22, -0.83)<br>Lumbar pain: SMD -1.38 (-2.06, -0.70) | <u>Pain VAS – cervical BL / 6 months, mean (SD †)</u><br>Exercise + education: 30.4 (30.5) / 7.7 (10.4)<br>Education: 27.5 (28.7) / 16.0 (23.9)<br>Control: 26.4 (33.1) / 28.3 (15.8)<br><u>Pain VAS – lumbar BL / 6 months, mean (SD †)</u><br>Exercise + education: 33.2 (40.3) / 9.2 (16.0)<br>Education: 26.5 (31.9) / 19.6 (26.9)<br>Control: 23.2 (28.1) / 32.0 (17.0) |                 | L          | L            | H/UC         | L             |
|                           | Lim (2005) [RCT] <sup>220</sup>                    |                                                                                                                                                                                                                                                                                  | <u>Pain, % change BL-8 weeks</u><br>Exercise: -33%<br>Control: 28%                                                                                                                                                                                                                                                                                                           |                 | H/UC       | H/UC         | H/UC         | L             |
|                           | Bespoke meta-analysis including <sup>227,229</sup> | <u>Exercise vs control</u><br>SMD -1.88 (-2.59, -1.17), I <sup>2</sup> 51.2%                                                                                                                                                                                                     |                                                                                                                                                                                                                                                                                                                                                                              |                 |            |              |              |               |
|                           | Durmus (2009) [NRT] <sup>223</sup>                 | <u>Muscle strengthening exercise vs conventional exercises</u><br>SMD -0.29 (-0.93, 0.35)<br><u>Muscle strengthening exercise vs control</u><br>SMD -0.78 (-1.51, -0.05)                                                                                                         | <u>Pain VAS, BL / 12 weeks</u><br>Muscle strengthening exercise: 4.78 (2.63) / 1.42 (1.80)<br>Conventional exercise: 4.84 (2.81) / 1.94 (1.80)<br>Control: 3.46 (2.40) / 3.00 (2.34)                                                                                                                                                                                         |                 |            |              |              |               |
|                           | Gyurcsik (2012) [Single arm int.] <sup>233</sup>   |                                                                                                                                                                                                                                                                                  | <u>Pain VAS, BL / 3 months, mean (SD)</u><br>41.1 (24.77) / 24 (21.16)                                                                                                                                                                                                                                                                                                       |                 |            |              |              |               |

† Mean (SD) estimated from median (interquartile range) using published formula<sup>87</sup>

Alloc. Conc. = allocation concealment, AMSTAR2 = Assessing the Methodological Quality of Systematic Reviews, axSpA = axial spondyloarthritis, BL = baseline, Blind. Asses. = Blinded assessors, Blind. Part. = blinded participants, CI = confidence interval, H/UC = high / unclear risk of bias, L = low risk of bias, Rand. Seq. = random sequence generation, RCT = randomised controlled trial, SD = standard deviation, SMD = standardised mean difference, VAS = visual analogue scale

Table – Muscle strengthening exercises (axSpA), results and quality assessment

| Outcome (outcome measure) | Study (date) [study type]                   | Standardised result, SMD (95% CI) unless otherwise stated                                                                                                         | Natural result                                                                                                                                                                                                                           | AMSTAR2 quality | Rand. Seq. | Alloc. Conc. | Blind. Part. | Blind. Asses. |
|---------------------------|---------------------------------------------|-------------------------------------------------------------------------------------------------------------------------------------------------------------------|------------------------------------------------------------------------------------------------------------------------------------------------------------------------------------------------------------------------------------------|-----------------|------------|--------------|--------------|---------------|
| Function                  | de Souza (2017) [RCT] <sup>225</sup>        | <u>Exercise vs control at 16 weeks</u><br>BASFI - SMD -0.23 (-0.73, 0.28)<br>HAQ-S – SMD -0.26 (-0.76, 0.25)                                                      | <u>BASFI, BL / 16 weeks, mean (SD)</u><br>Exercise: 4.62 (2.49) / 3.36 (2.16)<br>Control: 4.09 (2.40) / 3.90 (2.6)<br><u>HAQ-S, BL / 16 weeks, mean (SD)</u><br>Exercise: 0.79 (0.51) / 0.58 (0.44)<br>Control: 0.75 (0.53) / 0.70 (0.5) |                 | L          | L            | H/UC         | L             |
|                           | Kasapoglu Aksoy (2017) [RCT] <sup>226</sup> | <u>Exercise vs control at 3 months</u><br>SMD -0.19 (-0.80, 0.43)                                                                                                 | <u>BASFI, BL / 3 months, mean (SD)</u><br>Exercise: 2.88 (1.98) / 1.76 (1.47)<br>Control: 2.17 (2.37) / 2.12 (2.26)                                                                                                                      |                 | H/UC       | H/UC         | H/UC         | H/UC          |
|                           | Rosu (2015) [RCT] <sup>227</sup>            | <u>McKenzie program vs classic kinetic exercises at 24 weeks</u><br>SMD -0.58 (-1.15, -0.01)                                                                      | <u>BASFI, BL / 24 weeks, mean (SD)</u><br>McKenzie: 3.44 (1.93) / 1.25 (0.90)<br>Classic Kinetic: 3.11 (1.78) / 2.04 (1.73)                                                                                                              |                 | H/UC       | H/UC         | H/UC         | H/UC          |
|                           | Hsieh (2014) [RCT] <sup>218</sup>           | <u>Strength + range of motion vs range of motion only at 3 months</u><br>SMD -0.58 (-1.50, 0.34)                                                                  | <u>BASFI, BL / 3 months, mean (SD)</u><br>Strength + range of motion: 3.7 (3.3) / 1.9 (2.3)<br>Range of motion only: 3.5 (2.9) / 3.5 (3.1)                                                                                               |                 | L          | L            | H/UC         | L             |
|                           | Masiero (2014) [RCT] <sup>228</sup>         | <u>Exercise + education vs education at 6 months</u><br>SMD -0.10 (-0.70, 0.50)<br><u>Exercise + education vs control at 6 months</u><br>SMD -0.47 (-1.09, 0.14)  | <u>BASFI, BL / 12 months, mean (SD)</u><br>Exercise + education: 3.0 (1.5) / 2.2 (1.3)<br>Education: 2.7 (1.6) / 2.4 (2.4)<br>Control: 2.9 (1.7) / 3.0 (2.0)                                                                             |                 | L          | L            | H/UC         | L             |
|                           | Altan (2012) [RCT] <sup>230</sup>           | <u>Exercise vs control at 12 weeks</u><br>BASFI: SMD -0.37 (-0.91, 0.18)                                                                                          | <u>BASFI, BL / 12 weeks / 24 weeks, mean (SD)</u><br>Exercise: 2.4 (1.6) / 1.7 (1.6) / 1.7 (1.6)<br>Control: 2.2 (1.6) / 2.3 (1.7) / 2.3 (2.1)                                                                                           |                 | L          | H/UC         | H/UC         | L             |
|                           | Masiero (2011) [RCT] <sup>229</sup>         | <u>Exercise + education vs education at 6 months</u><br>SMD -0.08 (-0.70, 0.55)<br><u>Exercise + education vs control at 6 months</u><br>SMD -0.84 (-1.47, -0.21) | <u>BASFI, BL / 6 months, mean (SD †)</u><br>Exercise + education: 3.1 (2.5) / 1.3 (1.0)<br>Education: 2.5 (1.8) / 1.4 (1.6)<br>Control: 3.1 (2.1) / 2.7 (2.1)                                                                            |                 | L          | L            | H/UC         | L             |

Alloc. Conc. = allocation concealment, AMSTAR2 = Assessing the Methodological Quality of Systematic Reviews, axSpA = axial spondyloarthritis, BASFI = Bath Ankylosing Spondylitis Functional Index, BL = baseline, Blind. Asses. = Blinded assessors, Blind. Part. = blinded participants, CI = confidence interval, H/UC = high / unclear risk of bias, HAQ-S = Health Assessment Questionnaire for spondyloarthritis, L = low risk of bias, Rand. Seq. = random sequence generation, RCT = randomised controlled trial, SD = standard deviation, SMD = standardised mean difference

Table – Muscle strengthening exercises (axSpA), results and quality assessment

| Outcome (outcome measure) | Study (date) [study type]                                      | Standardised result, SMD (95% CI) unless otherwise stated                                                                                                                | Natural result                                                                                                                                                                    | AMSTAR2 quality | Rand. Seq. | Alloc. Conc. | Blind. Part. | Blind. Asses. |
|---------------------------|----------------------------------------------------------------|--------------------------------------------------------------------------------------------------------------------------------------------------------------------------|-----------------------------------------------------------------------------------------------------------------------------------------------------------------------------------|-----------------|------------|--------------|--------------|---------------|
| Function                  | Fernandez-de-las-Penas (2006) [RCT] <sup>231</sup>             | <u>Exercise vs control at 12 months</u><br>SMD -0.07 (-0.69, 0.55)                                                                                                       | <u>BASFI, BL / 12 months, mean (SD)</u><br>Interventional exercise: 51.8 (20.8) / 46.7 (19.9)<br>Control exercise: 47 (19) / 48 (19.4)                                            |                 | L          | H/UC         | H/UC         | L             |
|                           | Fernandez-de-las-Penas (2005) [RCT] <sup>232</sup>             | <u>Exercise vs control at 4 months</u><br>SMD -0.04 (-0.67, 0.58)                                                                                                        | <u>BASFI, BL / 4 months, mean (SD)</u><br>Interventional exercise: 51.8 (20.8) / 45.7 (20.6)<br>Control exercise: 47 (19) / 46.5 (21)                                             |                 | L          | H/UC         | H/UC         | L             |
|                           | Lim (2005) [RCT] <sup>220</sup>                                |                                                                                                                                                                          | <u>Functional capacity, % change BL-8 weeks</u><br>Exercise: 46%<br>Control: unchanged                                                                                            |                 | H/UC       | H/UC         | H/UC         | L             |
|                           | Bespoke meta-analysis including <sup>225-227,229,230,232</sup> | <u>Exercise vs control</u><br>SMD -0.36 (-0.60, -0.13), I <sup>2</sup> 0%                                                                                                |                                                                                                                                                                                   |                 |            |              |              |               |
|                           | Yigit (2013) [NRT] <sup>221</sup>                              | <u>Muscle strengthening exercise vs control</u><br>SMD -0.77 (-1.41, -0.12)                                                                                              | <u>BASFI, BL / 10 weeks</u><br>Muscle strengthening exercise: 3.22 (2.96) / 2.27 (2.10)<br>Control: 3.86 (2.36) / 4.00 (2.41)                                                     |                 |            |              |              |               |
|                           | Durmus (2009) [NRT] <sup>222</sup>                             | <u>Muscle strengthening exercise vs control</u><br>SMD -0.89 (-1.53, -0.25)                                                                                              | <u>BASFI, BL / 12 weeks, mean (SD)</u><br>Muscle strengthening exercise: 2.22 (1.53) / 1.25 (1.07)<br>Control: 2.55 (1.40) / 2.30 (1.32)                                          |                 |            |              |              |               |
|                           | Durmus (2009) [NRT] <sup>223</sup>                             | <u>Muscle strengthening exercise vs conventional exercises</u><br>SMD -0.38 (-1.02, 0.26)<br><u>Muscle strengthening exercise vs control</u><br>SMD -0.82 (-1.56, -0.09) | <u>BASFI, BL / 12 weeks</u><br>Muscle strengthening exercise: 2.65 (2.39) / 1.28 (1.47)<br>Conventional exercise: 3.18 (2.05) / 1.83 (1.41)<br>Control: 3.32 (2.59) / 2.97 (2.71) |                 |            |              |              |               |
|                           | Gyurcsik (2012) [Single arm int.] <sup>233</sup>               |                                                                                                                                                                          | <u>BASFI, BL / 3 months, mean (SD)</u><br>4.33 (2.61) / 3.81 (2.71)                                                                                                               |                 |            |              |              |               |
|                           | Hulejova (2012) [Single arm int.] <sup>234</sup>               |                                                                                                                                                                          | <u>BASFI, BL / 3 months, mean (SD)</u><br>2.31 (1.92) / 1.37 (1.34)                                                                                                               |                 |            |              |              |               |
|                           | Ortancil (2009) [Single arm int.] <sup>235</sup>               |                                                                                                                                                                          | <u>BASFI, BL / 6 weeks, mean (SD)</u><br>2.9 (2.0) / 2.7 (2.0)                                                                                                                    |                 |            |              |              |               |

Alloc. Conc. = allocation concealment, AMSTAR2 = Assessing the Methodological Quality of Systematic Reviews, axSpA = axial spondyloarthritis, BASFI = Bath Ankylosing Spondylitis Functional Index, BL = baseline, Blind. Asses. = Blinded assessors, Blind. Part. = blinded participants, CI = confidence interval, H/UC = high / unclear risk of bias, L = low risk of bias, NRT = non-randomised trial, Rand. Seq. = random sequence generation, RCT = randomised controlled trial, SD = standard deviation, SMD = standardised mean difference



Table – Muscle strengthening exercises (axSpA), results and quality assessment

| Outcome (outcome measure) | Study (date) [study type]                   | Standardised result, SMD (95% CI) unless otherwise stated                                                                                                        | Natural result                                                                                                                                                                                                                                                                                                                                                            | AMSTAR2 quality | Rand. Seq. | Alloc. Conc. | Blind. Part. | Blind. Asses. |
|---------------------------|---------------------------------------------|------------------------------------------------------------------------------------------------------------------------------------------------------------------|---------------------------------------------------------------------------------------------------------------------------------------------------------------------------------------------------------------------------------------------------------------------------------------------------------------------------------------------------------------------------|-----------------|------------|--------------|--------------|---------------|
| Disease activity          | de Souza (2017) [RCT] <sup>225</sup>        | <u>Exercise vs control at 16 weeks</u><br>BASDAI - SMD -0.02 (-0.53, 0.49)<br>ASDAS-CRP – SMD 0.07 (-0.44, 0.58)<br>ASSDAS-ESR – SMD -0.42 (-0.93, 0.10)         | <u>BASDAI, BL / 16 weeks, mean (SD)</u><br>Exercise: 2.52 (1.65) / 2.08 (1.84)<br>Control: 2.34 (2.26) / 2.12 (2.4)<br><u>ASDAS-CRP, BL / 16 weeks, mean (SD)</u><br>Exercise: 2.20 (0.91) / 1.93 (0.84)<br>Control: 1.89 (1.00) / 1.86 (1.10)<br><u>ASDAS-ESR, BL / 16 weeks, mean (SD)</u><br>Exercise: 2.23 (0.87) / 1.73 (0.70)<br>Control: 2.11 (0.97) / 2.15 (1.25) |                 | L          | L            | H/UC         | L             |
|                           | Kasapoglu Aksoy (2017) [RCT] <sup>226</sup> | <u>Exercise vs control at 3 months</u><br>SMD 0.00 (-0.61, 0.61)                                                                                                 | <u>BASDAI, BL / 3 months, mean (SD)</u><br>Exercise: 3.52 (1.55) / 2.74 (1.43)<br>Control: 2.93 (2.12) / 2.74 (1.69)                                                                                                                                                                                                                                                      |                 | H/UC       | H/UC         | H/UC         | H/UC          |
|                           | Rosu (2015) [RCT] <sup>227</sup>            | <u>McKenzie program vs classic kinetic exercises at 24 weeks</u><br>SMD -1.10 (-1.70, -0.50)                                                                     | <u>BASDAI, BL / 24 weeks, mean (SD)</u><br>McKenzie: 4.98 (1.83) / 1.91 (0.75)<br>Classic Kinetic: 4.98 (1.65) / 3.48 (1.91)                                                                                                                                                                                                                                              |                 | H/UC       | H/UC         | H/UC         | H/UC          |
|                           | Hsieh (2014) [RCT] <sup>218</sup>           | <u>Strength + range of motion vs range of motion only at 3 months</u><br>SMD -0.32 (-1.23, 0.59)                                                                 | <u>BASDAI, BL / 3 months, mean (SD)</u><br>Strength + range of motion: 4.2 (1.9) / 3.7 (1.8)<br>Range of motion only: 4.5 (2.1) / 4.5 (3.0)                                                                                                                                                                                                                               |                 | L          | L            | H/UC         | L             |
|                           | Masiero (2014) [RCT] <sup>228</sup>         | <u>Exercise + education vs education at 6 months</u><br>SMD -0.34 (-0.94, 0.26)<br><u>Exercise + education vs control at 6 months</u><br>SMD -0.55 (-1.17, 0.06) | <u>BASDAI, BL / 12 months, mean (SD)</u><br>Exercise + education: 3.8 (1.6) / 2.2 (1.3)<br>Education: 2.9 (1.2) / 2.8 (2.1)<br>Control: 3.1 (1.7) / 3.2 (2.2)                                                                                                                                                                                                             |                 | L          | L            | H/UC         | L             |
|                           | Altan (2012) [RCT] <sup>230</sup>           | <u>Exercise vs control at 12 weeks</u><br>SMD -0.54 (-1.09, 0.02)                                                                                                | <u>BASDAI, BL / 12 weeks / 24 weeks, mean (SD)</u><br>Exercise: 2.8 (1.7) / 2.1 (2 [sic]) / 2.4 (1.7)<br>Control: 2.6 (1.8) / 3.1 (1.7) / 3.1 (2 [sic])                                                                                                                                                                                                                   |                 | L          | H/UC         | H/UC         | L             |
|                           | Masiero (2011) [RCT] <sup>229</sup>         | <u>Exercise + education vs education at 6 months</u><br>SMD -0.33 (-0.96, 0.29)<br><u>Exercise + education vs control at 6 months</u><br>SMD -0.56 (-1.18, 0.06) | <u>BASDAI, BL / 6 months, mean (SD †)</u><br>Exercise + education: error in paper / 2.0 (2.0)<br>Education: 3.8 (3.4) / 2.7 (2.2)<br>Control: 3.1 (2.1) / 3.3 (2.6)                                                                                                                                                                                                       |                 | L          | L            | H/UC         | L             |

Alloc. Conc. = allocation concealment, AMSTAR2 = Assessing the Methodological Quality of Systematic Reviews, ASDAS = Ankylosing spondylitis disease activity index, axSpA = axial spondyloarthritis, BASDAI = Bath Ankylosing Spondylitis Disease Activity Index, BL = baseline, Blind. Asses. = Blinded assessors, Blind. Part. = blinded participants, CI = confidence interval, CRP = C-reactive protein, ESR = erythrocyte sedimentation rate, H/UC = high / unclear risk of bias, L = low risk of bias, Rand. Seq. = random sequence generation, RCT = randomised controlled trial, SD = standard deviation, SMD = standardised mean difference

Table – Muscle strengthening exercises (axSpA), results and quality assessment

| Outcome (outcome measure) | Study (date) [study type]                                      | Standardised result, SMD (95% CI) unless otherwise stated                                                                                                               | Natural result                                                                                                                                                                     | AMSTAR2 quality | Rand. Seq. | Alloc. Conc. | Blind. Part. | Blind. Asses. |
|---------------------------|----------------------------------------------------------------|-------------------------------------------------------------------------------------------------------------------------------------------------------------------------|------------------------------------------------------------------------------------------------------------------------------------------------------------------------------------|-----------------|------------|--------------|--------------|---------------|
| Disease activity          | Fernandez-de-las-Penas (2006) [RCT] <sup>231</sup>             | <u>Exercise vs control at 12 months</u><br>SMD -0.12 (-0.74, 0.50)                                                                                                      | <u>BASDAI, BL / 12 months, mean (SD)</u><br>Interventional exercise: 27.6 (9.1) / 26.8 (11.3)<br>Control exercise: 28.5 (10) / 28 (8.9)                                            |                 | L          | H/UC         | H/UC         | L             |
|                           | Fernandez-de-las-Penas (2005) [RCT] <sup>232</sup>             | <u>Exercise vs control at 4 months</u><br>SMD -0.02 (-0.64, 0.60)                                                                                                       | <u>BASDAI, BL / 4 months, mean (SD)</u><br>Interventional exercise: 27.6 (9.1) / 26 (11.3)<br>Control exercise: 28.5 (10) / 26.2 (8.6)                                             |                 | L          | H/UC         | H/UC         | L             |
|                           | Bespoke meta-analysis including <sup>225-227;229;230;232</sup> | <u>Exercise vs control</u><br>-0.37 (-0.72, -0.02), I <sup>2</sup> 54.1%                                                                                                |                                                                                                                                                                                    |                 |            |              |              |               |
|                           | Yigit (2013) [NRT] <sup>221</sup>                              | <u>Muscle strengthening exercise vs control</u><br>SMD -0.55 (-1.19, 0.08)                                                                                              | <u>BASDAI, BL / 10 weeks</u><br>Muscle strengthening exercise: 3.85 (2.45) / 2.61 (1.83)<br>Control: 3.81 (2.38) / 3.77 (2.33)                                                     |                 |            |              |              |               |
|                           | Durmus (2009) [NRT] <sup>222</sup>                             | <u>Muscle strengthening exercise vs control</u><br>SMD -1.12 (-1.77, -0.47)                                                                                             | <u>BASDAI, BL / 12 weeks, mean (SD)</u><br>Muscle strengthening exercise: 2.52 (1.25) / 1.35 (0.78)<br>Control: 2.63 (1.07) / 2.34 (1.01)                                          |                 |            |              |              |               |
|                           | Durmus (2009) [NRT] <sup>223</sup>                             | <u>Muscle strengthening exercise vs conventional exercises</u><br>SMD -0.20 (-0.84, 0.44)<br><u>Muscle strengthening exercise vs control</u><br>SMD -0.66 (-1.38, 0.07) | <u>BASDAI, BL / 12 weeks</u><br>Muscle strengthening exercise: 2.73 (1.31) / 1.33 (0.88)<br>Conventional exercise: 2.96 (1.21) / 1.50 (0.83)<br>Control: 2.50 (1.31) / 2.08 (1.44) |                 |            |              |              |               |
|                           | Gyurcsik (2012) [Single arm int.] <sup>233</sup>               |                                                                                                                                                                         | <u>BASDAI, BL / 3 months, mean (SD)</u><br>4.36 (2.62) / 3.94 (2.6)<br><u>Disease activity VAS, BL / 3 months, mean (SD)</u><br>38.7 (24.66) / 26.7 (23.61)                        |                 |            |              |              |               |
|                           | Hulejova (2012) [Single arm int.] <sup>234</sup>               |                                                                                                                                                                         | <u>BASDAI, BL / 3 months, mean (SD)</u><br>2.98 (1.84) / 1.80 (1.43)                                                                                                               |                 |            |              |              |               |

Alloc. Conc. = allocation concealment, AMSTAR2 = Assessing the Methodological Quality of Systematic Reviews, axSpA = axial spondyloarthritis, BASDAI = Bath Ankylosing Spondylitis Disease Activity Index, BL = baseline, Blind. Asses. = Blinded assessors, Blind. Part. = blinded participants, CI = confidence interval, H/UC = high / unclear risk of bias, L = low risk of bias, NRT = non-randomised trial, Rand. Seq. = random sequence generation, RCT = randomised controlled trial, SD = standard deviation, SMD = standardised mean difference

Table – Muscle strengthening exercises (axSpA), results and quality assessment

| Outcome (outcome measure) | Study (date) [study type]                                  | Standardised result, SMD (95% CI) unless otherwise stated                                                                                                        | Natural result                                                                                                                                                | AMSTAR2 quality | Rand. Seq. | Alloc. Conc. | Blind. Part. | Blind. Asses. |
|---------------------------|------------------------------------------------------------|------------------------------------------------------------------------------------------------------------------------------------------------------------------|---------------------------------------------------------------------------------------------------------------------------------------------------------------|-----------------|------------|--------------|--------------|---------------|
| Spinal mobility           | de Souza (2017) [RCT] <sup>225</sup>                       | <u>Exercise vs control at 16 weeks</u><br>SMD -0.33 (-0.84, 0.18)                                                                                                | <u>BASMI, BL / 16 weeks, mean (SD)</u><br>Exercise: 4.94 (2.09) / 4.69 (1.94)<br>Control: 5.19 (2.04) / 5.37 (2.2)                                            |                 | L          | L            | H/UC         | L             |
|                           | Kasapoglu Aksoy (2017) [RCT] <sup>226</sup>                | <u>Exercise vs control at 3 months</u><br>SMD 0.13 (-0.49, 0.74)                                                                                                 | <u>BASMI, BL / 3 months, mean (SD)</u><br>Exercise: 0.62 (0.43) / 0.59 (0.41)<br>Control: 0.54 (0.35) / 0.54 (0.37)                                           |                 | H/UC       | H/UC         | H/UC         | H/UC          |
|                           | Rosu (2015) [RCT] <sup>227</sup>                           | <u>McKenzie program vs classic kinetic exercises at 24 weeks</u><br>SMD -3.52 (-4.42, -2.62)                                                                     | <u>BASMI, BL / 24 weeks, mean (SD)</u><br>McKenzie: 3.58 (0.50) / 0.77 (0.82)<br>Classic Kinetic: 3.58 (0.50) / 3.08 (0.41)                                   |                 | H/UC       | H/UC         | H/UC         | H/UC          |
|                           | Masiero (2014) [RCT] <sup>228</sup>                        | <u>Exercise + education vs education at 6 months</u><br>SMD 0.11 (-0.49, 0.71)<br><u>Exercise + education vs control at 6 months</u><br>SMD -0.20 (-0.81, 0.41)  | <u>BASMI, BL / 12 months, mean (SD)</u><br>Exercise + education: 4.7 (1.1) / 3.8 (1.4)<br>Education: 3.8 (1.1) / 3.6 (2.1)<br>Control: 4.0 (1.3) / 4.10 (1.6) |                 | L          | L            | H/UC         | L             |
|                           | Masiero (2011) [RCT] <sup>229</sup>                        | <u>Exercise + education vs education at 6 months</u><br>SMD -0.17 (-0.79, 0.45)<br><u>Exercise + education vs control at 6 months</u><br>SMD -0.61 (-1.23, 0.01) | <u>BASMI, BL / 6 months, mean (SD †)</u><br>Exercise + education: 4.6 (2.2) / 3.1 (1.1)<br>Education: 3.8 (2.0) / 3.4 (2.2)<br>Control: 4.0 (2.1) / 4.3 (2.5) |                 | L          | L            | H/UC         | L             |
|                           | Altan (2012) [RCT] <sup>230</sup>                          | <u>Exercise vs control at 12 weeks</u><br>SMD -0.16 (-0.70, 0.38)                                                                                                | <u>BASMI, BL / 12 weeks / 24 weeks, mean (SD)</u><br>Exercise: 8.8 (1.8) / 8.4 (1.9) / 8.4 (1.8)<br>Control: 8.9 (1.7) / 8.7 (1.8) / 9.1 (1.7)                |                 | L          | H/UC         | H/UC         | L             |
|                           | Bespoke meta-analysis including <sup>225-227;229;230</sup> | <u>Exercise vs control</u><br>SMD -0.85 (-1.81, 0.12), I <sup>2</sup> 91.9%<br>Removing outlier <sup>227</sup> : SMD -0.24 (-0.53, 0.04), I <sup>2</sup> 0%      |                                                                                                                                                               |                 |            |              |              |               |
|                           | Yigit (2013) [NRT] <sup>221</sup>                          | <u>Muscle strengthening exercise vs control</u><br>SMD -0.60 (-1.24, 0.03)                                                                                       | <u>BASMI, BL / 10 weeks</u><br>Muscle strengthening exercise: 5.05 (2.74) / 4.15 (2.62)<br>Control: 5.55 (2.50) / 5.70 (2.52)                                 |                 |            |              |              |               |

† Mean (SD) estimated from median (interquartile range) using published formula<sup>87</sup>

Alloc. Conc. = allocation concealment, AMSTAR2 = Assessing the Methodological Quality of Systematic Reviews, axSpA = axial spondyloarthritis, BASMI = Bath Ankylosing Spondylitis Metrology Index, BL = baseline, Blind. Asses. = Blinded assessors, Blind. Part. = blinded participants, CI = confidence interval, H/UC = high / unclear risk of bias, L = low risk of bias, Rand. Seq. = random sequence generation, RCT = randomised controlled trial, SD = standard deviation, SMD = standardised mean difference

Table – Muscle strengthening exercises (axSpA), results and quality assessment

| Outcome (outcome measure) | Study (date) [study type]                          | Standardised result, SMD (95% CI) unless otherwise stated                                                                                                        | Natural result                                                                                                                                                                             | AMSTAR2 quality | Rand. Seq. | Alloc. Conc. | Blind. Part. | Blind. Asses. |
|---------------------------|----------------------------------------------------|------------------------------------------------------------------------------------------------------------------------------------------------------------------|--------------------------------------------------------------------------------------------------------------------------------------------------------------------------------------------|-----------------|------------|--------------|--------------|---------------|
| Stiffness                 | Masiero (2014) [RCT] <sup>228</sup>                | <u>Exercise + education vs education at 6 months</u><br>SMD -0.37 (-0.97, 0.24)<br><u>Exercise + education vs control at 6 months</u><br>SMD -0.43 (-1.04, 0.19) | <u>Morning stiffness (0-10), BL / 12 months, mean (SD)</u><br>Exercise + education: 31.4 (17.8) / 18.9 (8.3)<br>Education: 27.6 (19.2) / 24.8 (21.0)<br>Control: 23.8 (19.8) / 26.5 (23.8) |                 | L          | L            | H/UC         | L             |
|                           | Masiero (2011) [RCT] <sup>229</sup>                | <u>Exercise + education vs education at 6 months</u><br>SMD -0.30 (-0.93, 0.32)<br><u>Exercise + education vs control at 6 months</u><br>SMD -0.31 (-0.92, 0.30) | <u>Morning stiffness (0-10), BL / 6 months, mean (SD †)</u><br>Exercise + education: 2.6 (1.9) / 1.7 (2.2)<br>Education: 2.6 (2.7) / 2.4 (2.4)<br>Control: 2.5 (3.6) / 2.5 (2.9)           |                 | L          | L            | H/UC         | L             |
| Patient global            | Kasapoglu Aksoy (2017) [RCT] <sup>226</sup>        | <u>Exercise vs control at 3 months</u><br>SMD -0.21 (-0.82, 0.41)                                                                                                | <u>BAS-G, BL / 3 months, mean (SD)</u><br>Exercise: 6.25 (1.68) / 4.70 (2.10)<br>Control: 5.19 (1.83) / 5.14 (2.12)                                                                        |                 | H/UC       | H/UC         | H/UC         | H/UC          |
|                           | Hsieh (2014) [RCT] <sup>218</sup>                  | <u>Strength + range of motion vs range of motion only at 3 months</u><br>SMD -0.17 (-1.08, 0.73)                                                                 | <u>BAS-G, BL / 3 months, mean (SD)</u><br>Strength + range of motion: 5.6 (2.7) / 3.6 (2.0)<br>Range of motion only: 5.0 (2.8) / 4.1 (3.5)                                                 |                 | L          | L            | H/UC         | L             |
| Quality of life           | Kasapoglu Aksoy (2017) [RCT] <sup>226</sup>        | <u>Exercise vs control at 3 months</u><br>SMD 0.04 (-0.57, 0.66)                                                                                                 | <u>ASQOL, BL / 3 months, mean (SD)</u><br>Exercise: 8.3 (4.4) / 5.3 (3.3)<br>Control: 5.3 (5.5) / 5.1 (5.5)                                                                                |                 | H/UC       | H/UC         | H/UC         | H/UC          |
|                           | Altan (2012) [RCT] <sup>230</sup>                  | <u>Exercise vs control at 12 weeks</u><br>SMD 0.19 (-0.35, 0.73)                                                                                                 | <u>ASQOL, BL / 12 weeks / 24 weeks, mean (SD)</u><br>Exercise: 3.7 (4.6) / 4 (4.9) / 4 (4.8)<br>Control: 3.5 (3.3) / 3.2 (3.2) / 3 (3.4)                                                   |                 | L          | H/UC         | H/UC         | L             |
|                           | Bespoke meta-analysis including <sup>226,230</sup> | <u>Exercise vs control</u><br>SMD 0.13 (-0.28, 0.53), I <sup>2</sup> 0%                                                                                          |                                                                                                                                                                                            |                 |            |              |              |               |

† Mean (SD) estimated from median (interquartile range) using published formula<sup>87</sup>

Alloc. Conc. = allocation concealment, AMSTAR2 = Assessing the Methodological Quality of Systematic Reviews, axSpA = axial spondyloarthritis, ASQOL = Ankylosing Spondylitis Quality of Life, BAS-G = Bath Ankylosing Spondylitis Global Score, BL = baseline, Blind. Asses. = Blinded assessors, Blind. Part. = blinded participants, CI = confidence interval, H/UC = high / unclear risk of bias, L = low risk of bias, Rand. Seq. = random sequence generation, RCT = randomised controlled trial, SD = standard deviation, SMD = standardised mean difference

Table – Muscle strengthening exercises (axSpA), results and quality assessment

| Outcome (outcome measure) | Study (date) [study type]           | Standardised result, SMD (95% CI) unless otherwise stated                                                                                                         | Natural result                                                                                                                                                      | AMSTAR2 quality | Rand. Seq. | Alloc. Conc. | Blind. Part. | Blind. Asses. |
|---------------------------|-------------------------------------|-------------------------------------------------------------------------------------------------------------------------------------------------------------------|---------------------------------------------------------------------------------------------------------------------------------------------------------------------|-----------------|------------|--------------|--------------|---------------|
| Fatigue                   | Masiero (2014) [RCT] <sup>228</sup> | <u>Exercise + education vs education at 6 months</u><br>SMD -0.55 (-1.16, 0.06)<br><u>Exercise + education vs control at 6 months</u><br>SMD -0.68 (-1.30, -0.06) | <u>Fatigue VAS, BL / 12 months, mean (SD)</u><br>Exercise + education: 4.6 (2.3) / 2.6 (1.7)<br>Education: 4.1 (2.4) / 3.4 (2.2)<br>Control: 3.0 (2.8) / 3.7 (2.5)  |                 | L          | L            | H/UC         | L             |
|                           | Masiero (2011) [RCT] <sup>229</sup> | <u>Exercise + education vs education at 6 months</u><br>SMD -0.55 (-1.18, 0.08)<br><u>Exercise + education vs control at 6 months</u><br>SMD -0.69 (-1.32, -0.07) | <u>Fatigue VAS, BL / 6 months, mean (SD †)</u><br>Exercise + education: 4.2 (2.6) / 2.1 (2.2)<br>Education: 4.3 (3.4) / 3.4 (2.5)<br>Control: 3.1 (3.0) / 3.7 (2.4) |                 | L          | L            | H/UC         | L             |
|                           | Yigit (2013) [NRT] <sup>221</sup>   | <u>Muscle strengthening exercise vs control</u><br>SMD -0.68 (-1.32, -0.04)                                                                                       | <u>MAF, BL / 10 weeks</u><br>Muscle strengthening exercise: 21.48 (12.62) / 15.95 (11.52)<br>Control: 24.85 (13.60) / 24.42 (13.38)                                 |                 |            |              |              |               |
|                           | Durmus (2009) [NRT] <sup>222</sup>  | <u>Muscle strengthening exercise vs control</u><br>SMD -0.45 (-1.06, 0.16)                                                                                        | <u>MAF, BL / 12 weeks, mean (SD)</u><br>Muscle strengthening exercise: 2.07 (0.77) / 1.30 (1.08)<br>Control: 2.02 (0.76) / 1.73 (0.74)                              |                 |            |              |              |               |
| Depression                | Lim (2005) [RCT] <sup>220</sup>     |                                                                                                                                                                   | <u>Depression, % change BL-8 weeks</u><br>Exercise: -31%<br>Control: 19%                                                                                            |                 | H/UC       | H/UC         | H/UC         | L             |
|                           | Yigit (2013) [NRT] <sup>221</sup>   | <u>Muscle strengthening exercise vs control</u><br>SMD -0.59 (-1.22, 0.05)                                                                                        | <u>BDI, BL / 10 weeks</u><br>Muscle strengthening exercise: 8.30 (7.27) / 5.75 (6.03)<br>Control: 11.15 (10.45) / 10.7 (10.33)                                      |                 |            |              |              |               |
|                           | Durmus (2009) [NRT] <sup>222</sup>  | <u>Muscle strengthening exercise vs control</u><br>SMD -1.71 (-2.42, -1.00)                                                                                       | <u>BDI, BL / 12 weeks, mean (SD)</u><br>Muscle strengthening exercise: 9.24 (3.17) / 3.16 (2.07)<br>Control: 9.88 (3.35) / 7.05 (2.53)                              |                 |            |              |              |               |

† Mean (SD) estimated from median (interquartile range) using published formula<sup>87</sup>

Alloc. Conc. = allocation concealment, AMSTAR2 = Assessing the Methodological Quality of Systematic Reviews, axSpA = axial spondyloarthritis, BDI = Beck Depression Inventory, BL = baseline, Blind. Asses. = Blinded assessors, Blind. Part. = blinded participants, CI = confidence interval, H/UC = high / unclear risk of bias, L = low risk of bias, MAF = Multidimensional Assessment of Fatigue, Rand. Seq. = random sequence generation, RCT = randomised controlled trial, SD = standard deviation, SMD = standardised mean difference

Table – Muscle strengthening exercises (axSpA), results and quality assessment

| Outcome (outcome measure) | Study (date) [study type]                          | Standardised result, SMD (95% CI) unless otherwise stated                                        | Natural result                                                                                                                                   | AMSTAR2 quality | Rand. Seq. | Alloc. Conc. | Blind. Part. | Blind. Asses. |
|---------------------------|----------------------------------------------------|--------------------------------------------------------------------------------------------------|--------------------------------------------------------------------------------------------------------------------------------------------------|-----------------|------------|--------------|--------------|---------------|
| CRP                       | de Souza (2017) [RCT] <sup>225</sup>               | <u>Exercise vs control at 16 weeks</u><br>SMD 0.45 (-0.07, 0.96)                                 | <u>CRP, BL / 16 weeks, mean (SD)</u><br>Exercise: 6.53 (6.00) / 9.27 (13.50)<br>Control: 4.70 (5.96) / 4.51 (6.75)                               |                 | L          | L            | H/UC         | L             |
|                           | Kasapoglu Aksoy (2017) [RCT] <sup>226</sup>        | <u>Exercise vs control at 3 months</u><br>SMD 0.10 (-0.51, 0.71)                                 | <u>CRP, BL / 3 months, mean (SD)</u><br>Exercise: 1.40 (1.47) / 1.22 (1.34)<br>Control: 1.30 (1.67) / 1.09 (1.28)                                |                 | H/UC       | H/UC         | H/UC         | H/UC          |
|                           | Hsieh (2014) [RCT] <sup>218</sup>                  | <u>Strength + range of motion vs range of motion only at 3 months</u><br>SMD -0.14 (-1.04, 0.77) | <u>CRP, BL / 3 months, mean (SD)</u><br>Strength + range of motion: 1.27 (1.10) / 0.79 (0.56)<br>Range of motion only: 1.07 (1.24) / 0.9 (0.99)  |                 | L          | L            | H/UC         | L             |
|                           | Bespoke meta-analysis including <sup>225;226</sup> | <u>Exercise vs control</u><br>SMD 0.30 (-0.09, 0.70), I <sup>2</sup> 0%                          |                                                                                                                                                  |                 |            |              |              |               |
|                           | Hulejova (2012) [Single arm int.] <sup>234</sup>   |                                                                                                  | <u>CRP, BL / 3 months, mean (SD)</u><br>8.14 (8.98) / 6.58 (7.93)                                                                                |                 |            |              |              |               |
| ESR                       | de Souza (2017) [RCT] <sup>225</sup>               | <u>Exercise vs control at 16 weeks</u><br>SMD -0.45 (-0.96, 0.06)                                | <u>ESR, BL / 16 weeks, mean (SD)</u><br>Exercise: 18.10 (13.23) / 13.31 (9.01)<br>Control: 18.00 (12.27) / 18.71 (14.33)                         |                 | L          | L            | H/UC         | L             |
|                           | Kasapoglu Aksoy (2017) [RCT] <sup>226</sup>        | <u>Exercise vs control at 3 months</u><br>SMD -0.17 (-0.78, 0.45)                                | <u>ESR, BL / 3 months, mean (SD)</u><br>Exercise: 14.60 (9.83) / 11.85 (7.59)<br>Control: 12.4 (11.40) / 13.42 (10.9)                            |                 | H/UC       | H/UC         | H/UC         | H/UC          |
|                           | Hsieh (2014) [RCT] <sup>218</sup>                  | <u>Strength + range of motion vs range of motion only at 3 months</u><br>SMD -0.01 (-0.91, 0.89) | <u>ESR, BL / 3 months, mean (SD)</u><br>Strength + range of motion: 36.8 (28.6) / 24.8 (12.0)<br>Range of motion only: 24.7 (23.1) / 25.0 (28.3) |                 | L          | L            | H/UC         | L             |
|                           | Bespoke meta-analysis including <sup>225;226</sup> | <u>Exercise vs control</u><br>SMD -0.33 (-0.73, 0.06), I <sup>2</sup> 0%                         |                                                                                                                                                  |                 |            |              |              |               |
|                           | Hulejova (2012) [Single arm int.] <sup>234</sup>   |                                                                                                  | <u>ESR, BL / 3 months, mean (SD)</u><br>14.68 (11.9) / 13.2 (9.94)                                                                               |                 |            |              |              |               |

Alloc. Conc. = allocation concealment, AMSTAR2 = Assessing the Methodological Quality of Systematic Reviews, axSpA = axial spondyloarthritis, BL = baseline, Blind. Asses. = Blinded assessors, Blind. Part. = blinded participants, CI = confidence interval, CRP = C-reactive protein, ESR = erythrocyte sedimentation rate, H/UC = high / unclear risk of bias, L = low risk of bias, Rand. Seq. = random sequence generation, RCT = randomised controlled trial, SD = standard deviation, SMD = standardised mean difference

Table – Muscle strengthening exercises (axSpA), results and quality assessment

| Outcome (outcome measure) | Study (date) [study type]                        | Standardised result, SMD (95% CI) unless otherwise stated                                                                                                             | Natural result                                                                                                                                                                                           | AMSTAR2 quality | Rand. Seq. | Alloc. Conc. | Blind. Part. | Blind. Asses. |
|---------------------------|--------------------------------------------------|-----------------------------------------------------------------------------------------------------------------------------------------------------------------------|----------------------------------------------------------------------------------------------------------------------------------------------------------------------------------------------------------|-----------------|------------|--------------|--------------|---------------|
| Spinal flexion            | Rosu (2015) [RCT] <sup>227</sup>                 | <u>McKenzie program vs classic kinetic exercises at 24 weeks</u><br>SMD 1.44 (0.82, 2.07)                                                                             | <u>Schober, BL / 24 weeks, mean (SD)</u><br>McKenzie: 2.87 (0.77) / 4.63 (0.58)<br>Classic Kinetic: 2.96 (0.82) / 3.69 (0.72)                                                                            |                 | H/UC       | H/UC         | H/UC         | H/UC          |
|                           | Gyurcsik (2012) [Single arm int.] <sup>233</sup> |                                                                                                                                                                       | <u>Schober, BL / 3 months, mean (SD)</u><br>2.36 (1.85) / 2.84 (2.17)                                                                                                                                    |                 |            |              |              |               |
|                           | Ortancil (2009) [Single arm int.] <sup>235</sup> |                                                                                                                                                                       | <u>Schober, BL / 6 weeks, mean (SD)</u><br>3.9 (1.6) / 4.0 (1.5)                                                                                                                                         |                 |            |              |              |               |
| Grip strength             | Hsieh (2014) [RCT] <sup>218</sup>                | <u>Strength + range of motion vs range of motion only at 3 months</u><br>SMD -0.06 (-0.96, 0.84)                                                                      | <u>Grip strength, BL / 3 months, mean (SD)</u><br>Strength + range of motion: 28.6 (11.0) / 30.5 (12.0)<br>Range of motion only: 29.5 (10.7) / 31.1 (9.2)                                                |                 | L          | L            | H/UC         | L             |
| Walk-test                 | de Souza (2017) [RCT] <sup>225</sup>             | <u>Exercise vs control at 16 weeks</u><br>SMD 0.76 (0.24, 1.29)                                                                                                       | <u>6 minute walk, BL / 16 weeks, mean (SD)</u><br>Exercise: 447.43 (54.99) / 464.43 (48.03)<br>Control: 435.43 (59.44) / 427.20 (49.6)                                                                   |                 | L          | L            | H/UC         | L             |
|                           | Durmus (2009) [NRT] <sup>223</sup>               | <u>Muscle strengthening exercise vs conventional exercises</u><br>SMD -0.06 (-0.69, 0.58)<br><u>Muscle strengthening exercise vs control</u><br>SMD 0.88 (0.14, 1.62) | <u>6 minute walk distance, BL / 12 weeks</u><br>Muscle strengthening exercise: 555.8 (91.0) / 620.4 (87.6)<br>Conventional exercise: 548.8 (82.4) / 625.0 (74.9)<br>Control: 537.4 (90.4) / 539.2 (99.9) |                 |            |              |              |               |
|                           | Ortancil (2009) [Single arm int.] <sup>235</sup> |                                                                                                                                                                       | <u>6 minute walk test, BL / 6 weeks, mean (SD)</u><br>574.2 (94.5) / 589.2 (87.1)                                                                                                                        |                 |            |              |              |               |

Alloc. Conc. = allocation concealment, AMSTAR2 = Assessing the Methodological Quality of Systematic Reviews, axSpA = axial spondyloarthritis, BL = baseline, Blind. Asses. = Blinded assessors, Blind. Part. = blinded participants, CI = confidence interval, H/UC = high / unclear risk of bias, L = low risk of bias, Rand. Seq. = random sequence generation, RCT = randomised controlled trial, SD = standard deviation, SMD = standardised mean difference

Table – Muscle strengthening exercises (axSpA), SF36 results at final follow-up, mean (SD)

| Author (date)                                    | PCS | MCS | GH            | PF            | RP            | RE            | SF            | BP            | V                | MH            |
|--------------------------------------------------|-----|-----|---------------|---------------|---------------|---------------|---------------|---------------|------------------|---------------|
| de Souza (2017) [Exercise] <sup>225</sup>        |     |     | 51.8 (21.5)   | 73 (18.3)     | 67.5 (42.1)   | 72.2 (43.9)   | 81.9 (21.7)   | 65.6 (19.4)   | 72.2 (17.8)      | 78.4 (18.4)   |
| de Souza (2017) [Control] <sup>225</sup>         |     |     | 47.3 (26.4)   | 68.2 (26)     | 71.7 (42.9)   | 84.4 (35.8)   | 78.7 (26.5)   | 65.6 (27.5)   | 3.7 (30.9) [sic] | 76.7 (26.6)   |
| Kasapoglu Aksoy (2017) [Exercise] <sup>226</sup> |     |     | 58.8 (19.4)   | 80.2 (16.5)   | 71.3 (35.6)   | 73.3 (41.3)   | 86.3 (18.9)   | 68.5 (20.4)   | 56.3 (17.7)      | 65.6 (18.7)   |
| Kasapoglu Aksoy (2017) [Control] <sup>226</sup>  |     |     | 51.4 (24.6)   | 73.3 (23.4)   | 66.7 (44.9)   | 69.8 (40.6)   | 77.9 (22.7)   | 57.1 (26.8)   | 47.1 (20.4)      | 55.4 (22.4)   |
| Yigit (2013) [Exercise] <sup>221</sup>           |     |     | 71.45 (15.93) | 73.50 (18.93) | 85.00 (32.85) | 84.99 (27.53) | 90.00 (22.43) | 73.35 (17.21) | 70.00 (16.86)    | 83.00 (12.03) |
| Yigit (2013) [Control] <sup>221</sup>            |     |     | 52.80 (23.36) | 59.50 (25.95) | 61.15 (39.30) | 68.81 (30.41) | 65.58 (31.71) | 54.30 (27.49) | 54.25 (21.11)    | 68.2 (19.05)  |
| Durmus (2009) [Exercise] <sup>222</sup>          |     |     | 0.72 (0.13)   | 0.86 (0.14)   | 0.77 (0.26)   | 0.80 (0.21)   | 0.81 (0.20)   | 0.78 (0.12)   | 0.80 (0.08)      | 0.80 (0.10)   |
| Durmus (2009) [Control] <sup>222</sup>           |     |     | 0.66 (0.19)   | 0.68 (0.20)   | 0.67 (0.22)   | 0.68 (0.62)   | 0.72 (0.19)   | 0.69 (0.18)   | 0.68 (0.21)      | 0.68 (0.18)   |

axSpA = axial spondyloarthritis, BP = bodily pain, GH = general health, MCS = mental component score, MH = mental health, PCS = physical component score, PF = physical function, RE = role emotional, RP = role physical, SD = standard deviation, SF = social functioning, V = vitality



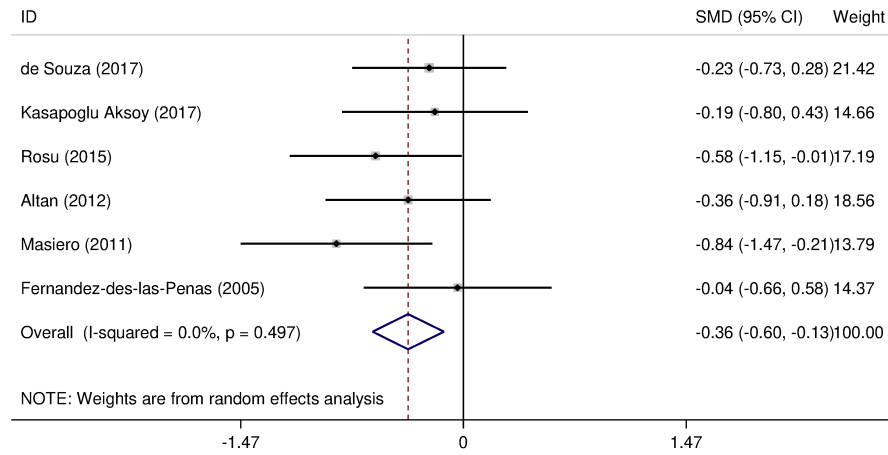

Figure – The effect of muscle strengthening exercise on function (axSpA)

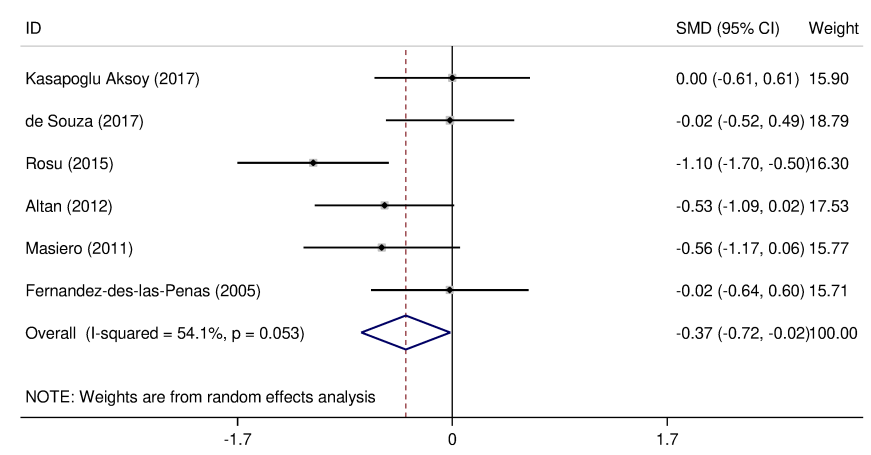

Figure – The effect of muscle strengthening exercise on disease activity

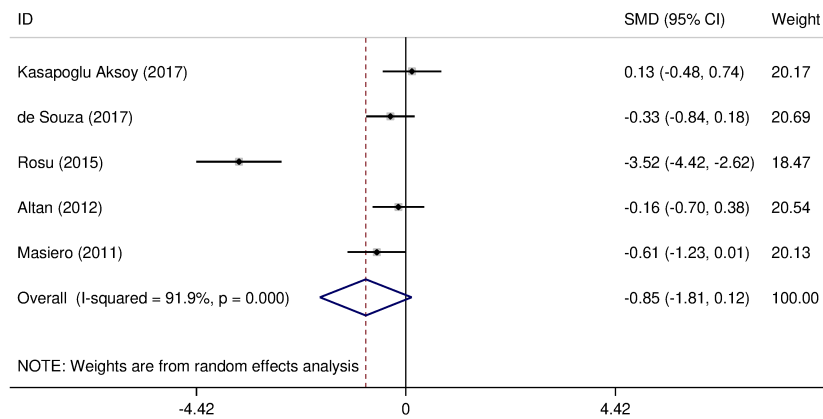

Figure – The effect of muscle strengthening exercise on spinal mobility

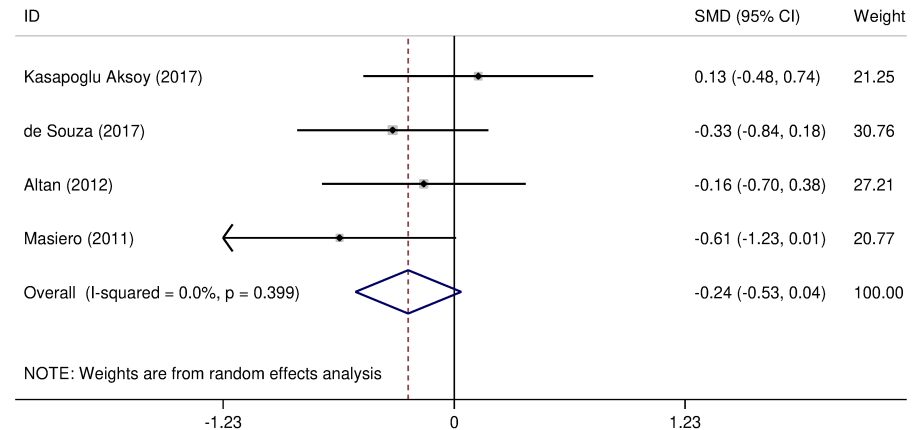

Figure – The effect of muscle strengthening exercise on spinal mobility – excluding one outlier (axSpA)

## Supplementary table 75 – Description of original studies of muscle strengthening exercise in PsA

Table – Muscle strengthening exercise (PsA), description of included studies

| Author (date) [country]                    | Study design    | Inclusion criteria                                                                                                                                                                                                                                                                                                                                                                                                           | Exposure detail                                                                             | N              | Age years, mean (SD)            | N (%) female                 | Funders                                                         |
|--------------------------------------------|-----------------|------------------------------------------------------------------------------------------------------------------------------------------------------------------------------------------------------------------------------------------------------------------------------------------------------------------------------------------------------------------------------------------------------------------------------|---------------------------------------------------------------------------------------------|----------------|---------------------------------|------------------------------|-----------------------------------------------------------------|
| Roger-Silva (2017) [Brazil] <sup>236</sup> | RCT             | CASPAR criteria, aged 18-65 years, use of DMARDs or TNFi with stable dose ≥3 months, stable doses of NSAIDs and steroids for ≥4 weeks<br>Exclusions: non-controlled cardiovascular disease, uncontrolled diabetes, severe psychiatric disease, fibromyalgia, history of regular exercise (≥30 mins 2x per week) in last 6 months, arthroplasty or hip/knee over last 12 months, other medical condition prohibiting exercise | 1) Muscle strengthening exercises of upper and lower limbs and trunk<br>p) Waitlist control | 1) 20<br>p) 21 | 1) 54.2 (8.2)<br>p) 50.8 (11.2) | 1) 10 (50.0)<br>p) 11 (54.5) | <b>Not reported</b> – authors declared no conflicts of interest |
| Chimenti (2014) [Italy] <sup>237</sup>     | Single arm int. | Moderate disease activity, stable medication for 3 months, all receiving biologic and DMARD combination                                                                                                                                                                                                                                                                                                                      | Exercise program – stationary muscle contraction                                            | 23             | 50.8 (9.5)                      | 12 (52.2)                    | <b>Industry</b> (Pfizer Italia)                                 |

CASPAR = Classification Criteria for Psoriatic Arthritis, DMARD = disease modifying anti-rheumatic drug, N = number, PsA = psoriatic arthritis, RCT = randomised controlled trial, SD = standard deviation, TNFi = tumour necrosis factor inhibitor

## Supplementary table 76 – Results from reviews and interventional studies of muscle strengthening exercise in PsA

Table – Muscle strengthening exercise (PsA), results and quality assessment

| Outcome (outcome measure) | Study (date) [study type]                        | Standardised result, SMD (95% CI) unless otherwise stated                                                    | Natural result                                                                                                                                                                                                                      | AMSTAR2 quality | Rand. Seq. | Alloc. Conc. | Blind. Part. | Blind. Asses. |
|---------------------------|--------------------------------------------------|--------------------------------------------------------------------------------------------------------------|-------------------------------------------------------------------------------------------------------------------------------------------------------------------------------------------------------------------------------------|-----------------|------------|--------------|--------------|---------------|
| Pain                      | Chimenti (2014) [Single arm int.] <sup>237</sup> |                                                                                                              | <u>Pain VAS, BL / 4 weeks / 12 weeks, mean SD</u><br>43.7 (23.1) / 34 (27.4) / 48.6 (24.8)                                                                                                                                          |                 |            |              |              |               |
| Function                  | Roger-Silva (2017) [RCT] <sup>236</sup>          | <u>Exercise vs control at 12 weeks</u><br>BASFI: SMD -0.50 (-1.12, 0.12)<br>HAQ-AS: SMD -0.65 (-1.28, -0.02) | <u>BASFI, BL / 12 weeks, mean (SD)</u><br>Exercise: 4.2 (2.0) / 2.9 (2.2)<br>Control: 3.9 (2.4) / 4.0 (2.2)<br><u>HAQ-AS, BL / 12 weeks, mean (SD)</u><br>Exercise: 0.72 (0.45) / 0.45 (0.43)<br>Control: 0.69 (0.45) / 0.77 (0.55) |                 | L          | L            | H/UC         | L             |
|                           | Chimenti (2014) [Single arm int.] <sup>237</sup> |                                                                                                              | <u>SPA-HAQ, BL / 4 weeks / 12 weeks, mean (SD)</u><br>0.58 (0.4) / 0.5 (0.42) / 0.56 (0.51)                                                                                                                                         |                 |            |              |              |               |
| Disease activity          | Roger-Silva (2017) [RCT] <sup>236</sup>          | <u>Exercise vs control at 12 weeks</u><br>BASDAI: -0.66 (-1.29, -0.03)<br>DAS28: -0.42 (-1.04, 0.20)         | <u>BASDAI, BL / 12 weeks, mean (SD)</u><br>Exercise: 5.3 (2.4) / 3.3 (2.1)<br>Control: 4.5 (2.1) / 4.8 (2.4)<br><u>DAS28, BL / 12 weeks, mean (SD)</u><br>Exercise: 4.1 (1.3) / 3.1 (1.3)<br>Control: 3.9 (1.1) / 3.6 (1.1)         |                 | L          | L            | H/UC         | L             |
| Patient global            | Chimenti (2014) [Single arm int.] <sup>237</sup> |                                                                                                              | <u>Global VAS, BL / 4 weeks / 12 weeks, mean (SD)</u><br>46.9 (18.7) / 38.25 (23.24) / 42.9 (27.01)                                                                                                                                 |                 |            |              |              |               |

Alloc. Conc. = allocation concealment, AMSTAR2 = Assessing the Methodological Quality of Systematic Reviews, BASDAI = Bath Ankylosing Spondylitis Disease Activity Index, BL = baseline, Blind. Asses. = Blinded assessors, Blind. Part. = blinded participants, CI = confidence interval, H/UC = high / unclear risk of bias, HAQ-AS = Health Assessment Questionnaire – Ankylosing spondylitis, L = low risk of bias, PsA = psoriatic arthritis, Rand. Seq. = random sequence generation, RCT = randomised controlled trial, SD = standard deviation, SMD = standardised mean difference, SPA-HAQ = Health Assessment Questionnaire for spondyloarthropathies, VAS = visual analogue scale

Table – Muscle strengthening exercises (PsA), SF36 results at final follow-up, median (IQR)

| Author (date)                                | PCS | MCS | GH          | PF          | RP          | RE          | SF          | BP          | V           | MH          |
|----------------------------------------------|-----|-----|-------------|-------------|-------------|-------------|-------------|-------------|-------------|-------------|
| Roger-Silva (2017) [Exercise] <sup>236</sup> |     |     | 63.6 (13.1) | 77.2 (22.4) | 71.3 (45.4) | 83.3 (35.0) | 79.5 (25.3) | 72.5 (19.2) | 70.9 (13.4) | 71.1 (14.3) |
| Roger-Silva (2017) [Control] <sup>236</sup>  |     |     | 53.0 (14.1) | 71.2 (18.4) | 58.8 (44.9) | 81.0 (34.3) | 72.0 (30.9) | 53.4 (22.3) | 61.4 (19.1) | 66.8 (21.7) |
| Chimenti (2014) [Exercise] <sup>237</sup>    |     |     | 6.21 (1.97) | 5.77 (1.64) | 24 (5.18)   | 4.53 (1.19) | 5.54 (0.87) | 6.36 (2.34) | 36.3 (3.9)  | 12.7 (3.8)  |

BP = bodily pain, FU = follow-up, GH = general health, IQR = interquartile range, MCS = mental component score, MH = mental health, PCS = physical component score, PF = physical function, PsA = psoriatic arthritis, RE = role emotional, RP = role physical, SD = standard deviation, SF = social functioning, V = vitality

## Supplementary table 77 – Description of original studies of aerobic exercise in SSc

Table – Aerobic exercise (SSc), description of included studies

| Author (date) [country]                 | Study design    | Inclusion criteria                                                                                                                                                                                                                                                                                                                                                                                    | Exposure detail                                                                                                                                                              | N     | Age years, mean (SD)                    | N (%) female | Funders                                                        |
|-----------------------------------------|-----------------|-------------------------------------------------------------------------------------------------------------------------------------------------------------------------------------------------------------------------------------------------------------------------------------------------------------------------------------------------------------------------------------------------------|------------------------------------------------------------------------------------------------------------------------------------------------------------------------------|-------|-----------------------------------------|--------------|----------------------------------------------------------------|
| Antonioli (2009) [Italy] <sup>238</sup> | Single arm int. | Leroy criteria, aged 18-75 years, stable disease no change in medication for 3 months<br>Exclusions: inability to perform rehabilitation program due to skeletal-muscle impairment or other illness, presence of other disease interfering with performance of daily activities, pulmonary hypertension, psychiatric disorders, alcohol / drug abuse, pregnancy or planned pregnancy in next 6 months | 1) 10x 30 min session – warm up, training of motor functions and respiratory exercises – lower extremity exercises included treadmill and free walking. Also hand stretching | 1) 16 | Median (IQR)<br>1) 66.5<br>(63.0, 70.5) | 1) 16 (100)  | <b>Not reported</b> – authors declared no conflict of interest |

int. = intervention, N = number, SD = standard deviation, SSc = systemic sclerosis

## Supplementary table 78 – Results from reviews and interventional studies of aerobic exercise in SSc

Table – Aerobic (SSc), results and quality assessment

| Outcome (outcome measure) | Study (date) [study type]                         | Standardised result, SMD (95% CI) unless otherwise stated | Natural result                                                                    | AMSTAR2 quality | Rand. Seq. | Alloc. Conc. | Blind. Part. | Blind. Asses. |
|---------------------------|---------------------------------------------------|-----------------------------------------------------------|-----------------------------------------------------------------------------------|-----------------|------------|--------------|--------------|---------------|
| Function                  | Antonioli (2009) [single arm int.] <sup>238</sup> |                                                           | <u>HAQ, BL / 4 months, median (IQR)</u><br>0.63 (0.34, 0.75) / 0.44 (0.25, 0.75)  |                 |            |              |              |               |
| Respiratory function      | Antonioli (2009) [single arm int.] <sup>238</sup> |                                                           | <u>SGRQ, BL / 4 months, median (IQR)</u><br>30.9 (17.3, 36.9) / 22.7 (12.5, 31.3) |                 |            |              |              |               |

Alloc. Conc. = allocation concealment, AMSTAR2 = Assessing the Methodological Quality of Systematic Reviews, BL = baseline, Blind. Asses. = Blinded assessors, Blind. Part. = blinded participants, CI = confidence interval, H/UC = high / unclear risk of bias, HAQ = Health Assessment Questionnaire, IQR = interquartile range, Rand. Seq. = random sequence generation, SGRQ = Saint George's Respiratory Questionnaire, SSc = systemic sclerosis

Table – Aerobic exercises (SSc), SF36 results at final follow-up, median (IQR)

| Author (date)                              | PCS                | MCS                | GH                 | PF                   | RP              | RE              | SF                | BP              | V                    | MH                 |
|--------------------------------------------|--------------------|--------------------|--------------------|----------------------|-----------------|-----------------|-------------------|-----------------|----------------------|--------------------|
| Antonioli (2009) [exercise] <sup>238</sup> | 44.0<br>(41.5, 48) | 50.4<br>(46, 54.3) | 42.5<br>(33.8, 75) | 75.0<br>(58.8, 81.3) | 50.0<br>(25,75) | 100<br>(0, 100) | 87.5<br>(75, 100) | 66.5<br>(41,74) | 50.0<br>(43.8, 71.3) | 66.0<br>(53.5, 78) |

BP = bodily pain, FU = follow-up, GH = general health, IQR = interquartile range, MCS = mental component score, MH = mental health, PCS = physical component score, PF = physical function, RE = role emotional, RP = role physical, SD = standard deviation, SF = social functioning, SSc = systemic sclerosis, V = vitality

## Supplementary table 79 – Description of reviews of studies of aerobic + muscle strengthening exercise in SSc

Table – Aerobic + muscle strengthening exercise (SSc), description of reviews

| Authors (date)              | Review type | Study type included      | Exposure detail | Number of studies included | Funders           |
|-----------------------------|-------------|--------------------------|-----------------|----------------------------|-------------------|
| Moran (2014) <sup>239</sup> | SR          | Single arm interventions | Exercise        | 1                          | <b>No funding</b> |

RCT = randomised controlled trial, SR = systematic review, SSc = systemic sclerosis

## Supplementary table 80 – Description of original studies of aerobic + muscle strengthening exercise in SSc

Table – Aerobic + muscle strengthening exercise (SSc), description of included studies

| Author (date) [country]                            | Study design    | Inclusion criteria                                                                                                                                                                                                                                                                                                                | Exposure detail                                                                                                                                                                                                                                                                                                     | N                | Age years, mean (SD)             | N (%) female                 | Funders                                                            |
|----------------------------------------------------|-----------------|-----------------------------------------------------------------------------------------------------------------------------------------------------------------------------------------------------------------------------------------------------------------------------------------------------------------------------------|---------------------------------------------------------------------------------------------------------------------------------------------------------------------------------------------------------------------------------------------------------------------------------------------------------------------|------------------|----------------------------------|------------------------------|--------------------------------------------------------------------|
| Rannou (2017) [France] <sup>240</sup>              | RCT             | ACR SSc criteria or Leroy and Medsger criteria, aged ≥18 years, HAQ ≥0.5<br>Exclusions: disabling comorbidities, cognitive impairment, participation in clinical trial in last 3 months, inclusion in a standardized physical therapy program in previous 6 months                                                                | 1) Individualised physical therapy program – objective to increase range of motion of impaired joints, increase muscle strength and aerobic capacity and decrease mouth microstomia, skin retractions and limitations in activities<br>p) Usual care                                                                | 1) 110<br>p) 108 | 1) 52.7 (14.8)<br>p) 53.1 (14.4) | 1) 95 (86.4)<br>p) 86 (79.6) | <b>Government</b><br>(Programme Hospitalier de Recherche Clinique) |
| Schouffoer (2011) [The Netherlands] <sup>241</sup> | RCT             | Leroy criteria, aged 18-75 years, able to cycle of exercise bike, stable anti-inflammatory medication over past 2 months, fluent in Dutch<br>Exclusions: engagement in another exercise program, concomitant disease interfering with performance of daily activities                                                             | 1) Multidisciplinary care with standardised group sessions (general exercise, hand/mouth exercises, education) + individual treatment by rheumatologist and health professional. Patients also participated in weekly group exercise sessions near their home and performed exercise at home<br>p) Waitlist control | 1) 28<br>p) 25   | 1) 53.9 (10.8)<br>p) 51.7 (10.8) | 1) 19 (67.9)<br>p) 21 (84.0) | <b>Not reported</b>                                                |
| Pinto (2011) [Brazil] <sup>242</sup>               | Single arm int. | ARA SSc criteria, women, physical inactive ≥6 months<br>Exclusions: moderate or severe pulmonary involvement, echocardiographic evidence of cardiac impairment, pulmonary artery systolic pressure ≥40 mm Hg, history of myositis, history of tobacco use, renal insufficiency, hypertension, anaemia, pathologic lung impairment | 12 week combined muscle strengthening and aerobic training program                                                                                                                                                                                                                                                  | 11               | 44 (13)                          | 11 (100)                     | <b>Not reported</b> – authors declared no conflict of interest     |

ACR = American College of Rheumatology, ARA = American Rheumatism Association, HAQ = Health Assessment Questionnaire, int. = intervention, N = number, RCT = randomised controlled trial, SD = standard deviation, SSc = systemic sclerosis

## Supplementary table 81 – Results from reviews and interventional studies of aerobic + muscle strengthening exercise in SSc

Table – Aerobic + muscle strengthening (SSc), results and quality assessment

| Outcome (outcome measure) | Study (date) [study type]                          | Standardised result, SMD (95% CI) unless otherwise stated                                               | Natural result                                                                                                                                                                                                                                                                                                         | AMSTAR2 quality | Rand. Seq. | Alloc. Conc. | Blind. Part. | Blind. Asses. |
|---------------------------|----------------------------------------------------|---------------------------------------------------------------------------------------------------------|------------------------------------------------------------------------------------------------------------------------------------------------------------------------------------------------------------------------------------------------------------------------------------------------------------------------|-----------------|------------|--------------|--------------|---------------|
| Pain                      | Rannou (2017) [RCT] <sup>240</sup>                 | <u>Exercise vs control at 1 month</u><br>SMD -0.00 (-0.27, 0.27)                                        | <u>Pain VAS, BL / 1 month / 12 months, mean (SD)</u><br>Exercise: 37.57 (27.73) / 24.47 (22.88) / 33.80 (29.83)<br>Control: 41.04 (30.85) / 41.57 (28.40) / 33.81 (31.42)                                                                                                                                              |                 |            |              |              |               |
|                           | Schouffoer (2011) [RCT] <sup>241</sup>             | <u>Exercise vs control, change BL-24 weeks</u><br>SMD -0.12 (-0.66, 0.42)                               | <u>Pain VAS, BL / change BL-24 weeks, mean (SD †)</u><br>Exercise: 27.0 (27.7) / -2.1 (24.7)<br>Control: 30.6 (25.5) / 1.2 (32.4)                                                                                                                                                                                      |                 | L          | H/UC         | H/UC         | L             |
| Function                  | Moran (2014) [SR] <sup>239</sup>                   |                                                                                                         | One study reported some improvement                                                                                                                                                                                                                                                                                    | Low             |            |              |              |               |
|                           | Rannou (2017) [RCT] <sup>240</sup>                 | <u>Exercise vs control at 1 month</u><br>HAQ: SMD -0.22 (-0.48, 0.05)<br>HAQ-S: SMD -0.30 (-0.57, 0.04) | <u>HAQ, BL / 1 month / 12 months, mean (SD)</u><br>Exercise: 1.36 (0.64) / 1.13 (0.61) / 1.19 (0.74)<br>Control: 1.34 (0.67) / 1.27 (0.69) / 1.20 (0.74)<br><u>HAQ-S, BL / 1 month / 12 months, mean (SD)</u><br>Exercise: 1.18 (0.55) / 0.98 (0.51) / 1.09 (0.65)<br>Control: 1.23 (0.60) / 1.15 (0.61) / 1.08 (0.64) |                 | L          | L            | H/UC         | H/UC          |
|                           | Schouffoer (2011) [RCT] <sup>241</sup>             | <u>Exercise vs control, change BL-24 weeks</u><br>SMD -0.29 (-0.84, 0.25)                               | <u>HAQ-S, BL / change BL-24 weeks, mean (SD †)</u><br>Exercise: 0.81 (0.66) / -0.26 (0.69)<br>Control: 0.73 (0.46) / -0.1 (0.31)                                                                                                                                                                                       |                 | L          | H/UC         | H/UC         | L             |
|                           | Bespoke meta-analysis including <sup>240;241</sup> | <u>Exercise vs control</u><br>SMD -0.30 (-0.54, -0.06), I <sup>2</sup> 0%                               |                                                                                                                                                                                                                                                                                                                        |                 |            |              |              |               |
| Hand function             | Rannou (2017) [RCT] <sup>240</sup>                 | <u>Exercise vs control at 1 month</u><br>SMD -0.39 (-0.66, -0.12)                                       | <u>Cochin hand function, BL / 1 month / 12 months, mean (SD)</u><br>Exercise: 20.05 (15.59) / 14.82 (13.47) / 18.64 (16.78)<br>Control: 22.18 (18.19) / 21.20 (18.95) / 20.26 (18.69)                                                                                                                                  |                 | L          | L            | H/UC         | H/UC          |
|                           | Schouffoer (2011) [RCT] <sup>241</sup>             | <u>Exercise vs control, change BL-24 weeks</u><br>SMD -0.54 (-1.09, 0.01)                               | <u>HAMIS, BL / change BL-24 weeks, mean (SD †)</u><br>Exercise: 6.8 (5.4) / -1.6 (4.2)<br>Control: 5.7 (3.9) / 0.2 (2.0)                                                                                                                                                                                               |                 | L          | H/UC         | H/UC         | L             |
|                           | Bespoke meta-analysis including <sup>240;241</sup> | <u>Exercise vs control</u><br>SMD -0.42 (-0.66, -0.18), I <sup>2</sup> 0%                               |                                                                                                                                                                                                                                                                                                                        |                 |            |              |              |               |
| Raynaud's phenomenon      | Moran (2014) [SR] <sup>239</sup>                   |                                                                                                         | One study reported no improvement                                                                                                                                                                                                                                                                                      | Low             |            |              |              |               |

† SD calculated from 95% CI in paper; Alloc. Conc. = allocation concealment, AMSTAR2 = Assessing the Methodological Quality of Systematic Reviews, BL = baseline, Blind. Asses. = Blinded assessors, Blind. Part. = blinded participants, CI = confidence interval, H/UC = high / unclear risk of bias, HAMIS = Hand mobility in scleroderma, HAQ-S = Health Assessment Questionnaire – scleroderma, L = low risk of bias, Rand. Seq. = random sequence generation, RCT = randomised controlled trial, SD = standard deviation, SMD = standardised mean difference, SSc = systemic sclerosis

Table – Aerobic + muscle strengthening (SSc), results and quality assessment

| Outcome (outcome measure) | Study (date) [study type]                     | Standardised result, SMD (95% CI) unless otherwise stated                | Natural result                                                                                                                               | AMSTAR2 quality | Rand. Seq. | Alloc. Conc. | Blind. Part. | Blind. Asses. |
|---------------------------|-----------------------------------------------|--------------------------------------------------------------------------|----------------------------------------------------------------------------------------------------------------------------------------------|-----------------|------------|--------------|--------------|---------------|
| Skin score                | Rannou (2017) [RCT] <sup>240</sup>            | <u>Exercise vs control at 12 months</u><br>SMD -0.31 (-0.58, -0.04)      | <u>Rodnan skin score, BL / 12 months, mean (SD)</u><br>Exercise: 14.21 (8.77) / 10.98 (7.78)<br>Control: 16.67 (10.55) / 13.49 (8.38)        |                 | L          | L            | H/UC         | H/UC          |
| Digital ulcers            | Moran (2014) [SR] <sup>239</sup>              |                                                                          | One study reported no improvement                                                                                                            | Low             |            |              |              |               |
| Grip strength             | Schouffoer (2011) [RCT] <sup>241</sup>        | <u>Exercise vs control, change BL-24 weeks</u><br>SMD 0.57 (0.02, 1.12)  | <u>Grip strength, BL / change BL-24 weeks, mean (SD †)</u><br>Exercise: 26.2 (12.4) / 2.6 (4.5)<br>Control: 26.7 (10.3) / -0.4 (6.0)         |                 | L          | H/UC         | H/UC         | L             |
|                           | Pinto (2011) [single arm int.] <sup>242</sup> |                                                                          | <u>Grip strength, BL / 12 week, mean (SD)</u><br>20 (9) / 22 (11)                                                                            |                 |            |              |              |               |
| Walk-test                 | Schouffoer (2011) [RCT] <sup>241</sup>        | <u>Exercise vs control, change BL-24 weeks</u><br>SMD 0.33 (-0.21, 0.88) | <u>6 min walk test, BL / change BL-24 weeks, mean (SD †)</u><br>Exercise: 499.9 (107.2) / 34.8 (72.8)<br>Control: 520.6 (94.2) / 12.0 (64.0) |                 | L          | H/UC         | H/UC         | L             |

† SD calculated from 95% CI in paper; Alloc. Conc. = allocation concealment, AMSTAR2 = Assessing the Methodological Quality of Systematic Reviews, BL = baseline, Blind. Asses. = Blinded assessors, Blind. Part. = blinded participants, CI = confidence interval, H/UC = high / unclear risk of bias, L = low risk of bias, Rand. Seq. = random sequence generation, RCT = randomised controlled trial, SD = standard deviation, SMD = standardised mean difference, SSc = systemic sclerosis

Table – Aerobic + muscle strengthening exercises (SSc), SF36 results at final follow-up, mean (SD)

| Author (date)                               | PCS          | MCS           | GH | PF | RP | RE | SF | BP | V | MH |
|---------------------------------------------|--------------|---------------|----|----|----|----|----|----|---|----|
| Rannou (2017) [Exercise] <sup>240</sup>     | 36.33 (8.08) | 44.87 (10.81) |    |    |    |    |    |    |   |    |
| Rannou (2017) [Control] <sup>240</sup>      | 35.98 (9.37) | 41.74 (11.54) |    |    |    |    |    |    |   |    |
| Schouffoer (2011) [Exercise] <sup>241</sup> | -0.7 (8.2) § | 1.9 (8.4) §   |    |    |    |    |    |    |   |    |
| Schouffoer (2011) [Control] <sup>241</sup>  | 1.4 (9.6) §  | 1.6 (9.9) §   |    |    |    |    |    |    |   |    |

§ Change from BL to 24 weeks

BP = bodily pain, GH = general health, IQR = interquartile range, MCS = mental component score, MH = mental health, PCS = physical component score, PF = physical function, RE = role emotional, RP = role physical, SD = standard deviation, SF = social functioning, V = vitality, SSc = systemic sclerosis



## Supplementary table 82 – Description of original studies of aquatic exercise in SSc

Table – Aquatic exercise (SSc), description of included studies

| Author (date) [country]                     | Study design      | Inclusion criteria | Exposure detail                                                                                                                                         | N  | Age years, mean (SD) | N (%) female | Funders                                                                                                  |
|---------------------------------------------|-------------------|--------------------|---------------------------------------------------------------------------------------------------------------------------------------------------------|----|----------------------|--------------|----------------------------------------------------------------------------------------------------------|
| Maddali Bongi (2009) [Italy] <sup>243</sup> | Single arm int. § | SSc                | 1 hour session in pool – 10 mins warm up, 20 mins stretching and pulmonary rehab, 20 min treatment of local and global pain by individualised exercises | 10 | 58.0 (15.1)          | 6 (60.0)     | <b>Professional body</b> (Italian Association for the study of Systemic Sclerosis and Fibrosis Diseases) |

§ Was an RCT, but the authors did not report any outcome data for the controls

N = number, SD = standard deviation, SSc = systemic sclerosis

## Supplementary table 83 – Results from reviews and interventional studies of aquatic exercise in SSc

Table – Aquatic exercise (SSc), results and quality assessment

| Outcome (outcome measure) | Study (date) [study type]                             | Standardised result, SMD (95% CI) unless otherwise stated | Natural result                                                                  | AMSTAR2 quality | Rand. Seq. | Alloc. Conc. | Blind. Part. | Blind. Asses. |
|---------------------------|-------------------------------------------------------|-----------------------------------------------------------|---------------------------------------------------------------------------------|-----------------|------------|--------------|--------------|---------------|
| Function                  | Maddali Bongi (2009) [Single arm int.] <sup>243</sup> |                                                           | HAQ, BL / 9 weeks / 18 weeks, mean (SD)<br>1.2 (1.2) / 0.9 (1.1) / 0.8 (1.2)    |                 |            |              |              |               |
| Hand function             | Maddali Bongi (2009) [Single arm int.] <sup>243</sup> |                                                           | HAMIS, BL / 9 weeks / 18 weeks, mean (SD)<br>10.2 (4.8) / 6.0 (3.7) / 6.4 (7.4) |                 |            |              |              |               |

Alloc. Conc. = allocation concealment, AMSTAR2 = Assessing the Methodological Quality of Systematic Reviews, BL = baseline, Blind. Asses. = Blinded assessors, Blind. Part. = blinded participants, CI = confidence interval, H/UC = high / unclear risk of bias, HAMIS = Hand mobility in scleroderma, HAQ = Health Assessment Questionnaire, L = low risk of bias, Rand. Seq. = random sequence generation, RCT = randomised controlled trial, SD = standard deviation, SMD = standardised mean difference, SSc = systemic sclerosis

Table – Aquatic exercises (SSc), SF36 results at final follow-up, mean (SD)

| Author (date)                                  | PCS        | MCS        | GH | PF | RP | RE | SF | BP | V | MH |
|------------------------------------------------|------------|------------|----|----|----|----|----|----|---|----|
| Maddali Bongi (2009) [Exercise] <sup>243</sup> | 44.9 (8.6) | 44.6 (6.0) |    |    |    |    |    |    |   |    |

BP = bodily pain, FU = follow-up, GH = general health, MCS = mental component score, MH = mental health, PCS = physical component score, PF = physical function, RE = role emotional, RP = role physical, SD = standard deviation, SF = social functioning, SSc = systemic sclerosis, V = vitality

## Supplementary table 84 – Description of original studies of muscle strengthening exercise in SSc

Table – Muscle strengthening exercise (SSc), description of included studies

| Author (date) [country]                    | Study design    | Inclusion criteria                                                                                                                                                                                                                                                                                     | Exposure detail                                                                                                                                                                                | N              | Age years, mean (SD)              | N (%) female                 | Funders                                                                                             |
|--------------------------------------------|-----------------|--------------------------------------------------------------------------------------------------------------------------------------------------------------------------------------------------------------------------------------------------------------------------------------------------------|------------------------------------------------------------------------------------------------------------------------------------------------------------------------------------------------|----------------|-----------------------------------|------------------------------|-----------------------------------------------------------------------------------------------------|
| Stefanantoni (2016) [Italy] <sup>244</sup> | RCT             | ACR SSc criteria, communicated in Italian, hand involvement (skin thickening with or without joint synovitis, joint contractures, tendon friction rubs, digital ulcers), stable disease defined as the absence of synovitis and digital ulcers                                                         | 1) Advice of hand exercises to maintain tissue elasticity<br>p) General guidelines for exercise                                                                                                | 1) 15<br>p) 16 | 1) 61.4<br>p) 60.5                | 1) 15 (100)<br>p) 15 (93.8)  | <b>Not reported</b> –<br>Authors declare no conflict of interest                                    |
| Horvath (2017) [Hungary] <sup>245</sup>    | NRT             | Aged 18-75 years, joint contractures of the hands, ability to participate in physical therapy in another city 150km away from University<br>Exclusion: CRP >10, severe interstitial lung disease, hypertension, cardiac disease, active skin ulcers, urine incontinence, attending other physiotherapy | 1) 30 mins isometric, isotonic and hand stretching exercises, ergotherapy, thermal baths, mud baths of the hands, whirlpool therapy<br>p) Had everything in intervention, but not hand therapy | 1) 31<br>p) 22 | 1) 59.7 (14.5)<br>p) 62.1 (8.4)   | 1) 29 (93.5)<br>p) 20 (90.9) | <b>Government</b><br>(Hungarian Scientific Research Funds, European Union and the State of Hungary) |
| Mugii (2018) [Japan] <sup>246</sup>        | Single arm int. | ACR criteria                                                                                                                                                                                                                                                                                           | Home hand stretching program                                                                                                                                                                   | 43             | Median (range)<br>51 (7 [sic]-73) | 35 (81.4)                    | <b>Government</b><br>(Diseases from the Ministry of Health, Labor and Welfare of Japan)             |
| Landim (2017) [Brazil] <sup>247</sup>      | Single arm int. | Aged ≥18 years, ACR/EULAR criteria, hand involvement, stable treatment for 3 months<br>Exclusions: Enrolled in any other rehabilitation program in previous 3 months, hand disability due to other pathology, could not perform exercises                                                              | home based, finger flexes and extensions, wrist flex and extension, forearm flexing and stretching, finger pinches                                                                             | 22             | 48.1 (11.7)                       | 18 (85.7)                    | <b>Not reported</b>                                                                                 |
| Mugii (2006) [Japan] <sup>248</sup>        | Single arm int. | ACR criteria                                                                                                                                                                                                                                                                                           | Home hand stretching program                                                                                                                                                                   | 45             | 48.6 (17.3)                       | 39 (86.7)                    | <b>Government</b><br>(Japanese Ministry of Health and Welfare)                                      |

ACR = American College of Rheumatology, CRP = C-reactive protein, EULAR = European League Against Rheumatism, N = number, NRT = non-randomised trial, RCT = randomised controlled trial, SD = standard deviation, SSc = systemic sclerosis

## Supplementary table 85 – Results from reviews and interventional studies of muscle strengthening exercise in SSc

Table – Muscle strengthening exercise (SSc), results and quality assessment

| Outcome (outcome measure) | Study (date) [study type]                      | Standardised result, SMD (95% CI) unless otherwise stated      | Natural result                                                                                                                                    | AMSTAR2 quality | Rand. Seq. | Alloc. Conc. | Blind. Part. | Blind. Asses. |
|---------------------------|------------------------------------------------|----------------------------------------------------------------|---------------------------------------------------------------------------------------------------------------------------------------------------|-----------------|------------|--------------|--------------|---------------|
| Pain                      | Horvath (2017) [NRT] <sup>245</sup>            |                                                                | <u>Pain VAS, change BL-6 months, mean (SD †)</u><br>Exercise: -8.3 (21.4)<br>Control: 0.44 (32.1)                                                 |                 |            |              |              |               |
|                           | Landim (2017) [Single arm int.] <sup>247</sup> |                                                                | <u>Pain VAS, BL / 8 weeks, mean (SD)</u><br>3.97 (2.92) / 2.21 (2.07)                                                                             |                 |            |              |              |               |
| Function                  | Stefanantoni (2016) [RCT] <sup>244</sup>       | <u>Exercise guidance vs control</u><br>SMD -0.55 (-1.27, 0.17) | <u>HAQ, BL / 3 months, mean (SD §)</u><br>Exercise guidance: 1.28 (0.99) / 0.77 (0.74)<br>Control: 1.55 (0.81) / 1.20 (0.81)                      |                 | H/UC       | H/UC         | H/UC         | L             |
|                           | Horvath (2017) [NRT] <sup>245</sup>            |                                                                | <u>HAQ, change BL-6 months, mean (SD †)</u><br>Exercise: -0.21 (0.47)<br>Control: 0.007 (0.89)                                                    |                 |            |              |              |               |
|                           | Mugii (2018) [Single arm int.] <sup>246</sup>  |                                                                | <u>HAQ, BL / 9 years, mean (SD)</u><br>"improved" ROM: 0.78 (0.47) / 0.67 (0.63)<br>"worsened" ROM: 0.50 (0.60) / 0.97 (0.62)                     |                 |            |              |              |               |
|                           | Landim (2017) [Single arm int.] <sup>247</sup> |                                                                | <u>HAQ, BL / 8 weeks, mean (SD)</u><br>1.08 (0.88) / 0.67 (0.62)<br><u>HAQ-S, BL / 8 weeks, mean (SD)</u><br>0.95 (0.53) / 0.48 (0.39)            |                 |            |              |              |               |
|                           | Mugii (2006) [Single arm int.] <sup>248</sup>  |                                                                | <u>HAQ, BL / 1 year, mean (SD)</u><br>0.48 (0.45) / 0.38 (0.47)                                                                                   |                 |            |              |              |               |
| Hand function             | Stefanantoni (2016) [RCT] <sup>244</sup>       |                                                                | <u>Duroz, BL / 3 months, median (IQR)</u><br>Exercise guidance: 23 (10, 36.5) / 15 (10, 28)<br>Control: 27.5 (15.7, 49.2) / 21.5 (22.7, 45) [sic] |                 | H/UC       | H/UC         | H/UC         | L             |
|                           | Horvath (2017) [NRT] <sup>245</sup>            |                                                                | <u>Cochin, change BL-6 months, mean (SD †)</u><br>Exercise: -2.0 (8.0)<br>Control: -0.5 (5.9)                                                     |                 |            |              |              |               |
|                           | Landim (2017) [Single arm int.] <sup>247</sup> |                                                                | <u>Cochin, BL / 8 weeks, mean (SD)</u><br>19.24 (15.78) / 12.48 (12.04)                                                                           |                 |            |              |              |               |
| Grip strength             | Landim (2017) [Single arm int.] <sup>247</sup> |                                                                | <u>Grip strength, BL / 8 weeks, mean (SD)</u><br>14.43 (6.87) / 19 (7.09)                                                                         |                 |            |              |              |               |

† SD calculated from 95% CI in paper

§ mean (SD) estimated from median (interquartile range) using publish formula<sup>87</sup>

Alloc. Conc. = allocation concealment, AMSTAR2 = Assessing the Methodological Quality of Systematic Reviews, BL = baseline, Blind. Asses. = Blinded assessors, Blind. Part. = blinded participants, CI = confidence interval, H/UC = high / unclear risk of bias, IQR = interquartile range, L = low risk of bias, NRT = non-randomised trial, Rand. Seq. = random sequence generation, RCT = randomised controlled trial, SD = standard deviation, SMD = standardised mean difference, SSc = systemic sclerosis

Table – Muscle strengthening exercises (SSc), SF36 results at final follow-up, mean (SD)

| Author (date)                                 | PCS          | MCS         | GH            | PF            | RP            | RE            | SF            | BP            | V          | MH            |
|-----------------------------------------------|--------------|-------------|---------------|---------------|---------------|---------------|---------------|---------------|------------|---------------|
| Stefanantoni (2016) [Exercise] <sup>244</sup> | 36.6 (10.63) | 39.6 (7.9)  |               |               |               |               |               |               |            |               |
| Stefanantoni (2016) [Control] <sup>244</sup>  | 40.6 (13.1)  | 40.6 (13.1) |               |               |               |               |               |               |            |               |
| Landim (2017) [Exercise] <sup>247</sup>       |              |             | 58.29 (16.15) | 61.90 (45.84) | 60.14 (20.06) | 53.96 (47.70) | 75.60 (17.44) | 63.38 (19.37) | 62 (20.86) | 72.38 (19.75) |

BP = bodily pain, FU = follow-up, GH = general health, MCS = mental component score, MH = mental health, PCS = physical component score, PF = physical function, RE = role emotional, RP = role physical, SD = standard deviation, SF = social functioning, SSc = systemic sclerosis, V = vitality

## Supplementary table 86 – Description of original studies of aerobic exercise in gout

Table – Aerobic exercise (gout), description of included studies

| Author (date) [country]          | Study design | Inclusion criteria                 | Exposure detail                                                | N    | Age years, mean (SD) | N (%) female | Funders                                                                                                                                                                |
|----------------------------------|--------------|------------------------------------|----------------------------------------------------------------|------|----------------------|--------------|------------------------------------------------------------------------------------------------------------------------------------------------------------------------|
| Ma (2018) [China] <sup>249</sup> | Case control | Primary gout – 2015 classification | Exercise was defined as doing regular sport ≥150 mins per week | 5693 | 51.1 (14.2)          | 327 (5.7)    | <b>Government</b> (Ministry of Science and Technology of China, National Science Foundation of China, Science and Technology Development Project of Shandong Province) |

N = number, SD = standard deviation

## Supplementary table 87 – Results from observational studies of aerobic exercise in gout

Table – Aerobic exercise (AS), results and quality assessment of observational studies

| Outcome (outcome measure) | Study (date) [study type]               | Standardised result, SMD (95% CI) unless otherwise stated | Natural result                                                                                                  | Study Pop. | Attr. | Prog. Meas. | Outc. Meas. | Conf. | Stats. |
|---------------------------|-----------------------------------------|-----------------------------------------------------------|-----------------------------------------------------------------------------------------------------------------|------------|-------|-------------|-------------|-------|--------|
| Tophus                    | Ma (2018) [case control] <sup>249</sup> |                                                           | <u>Tophus, OR (95% CI) [adjusted]</u><br>OR 0.67 (0.54, 0.83) – exercise associated with reduced odds of tophus | L          | L     | M           | L           | L     | M      |

Attr. = attrition, CI = confidence interval, Conf. = confounding, JSW = joint space width, L = low risk of bias, M = moderate risk of bias, OR = odds ratio, Outc. Meas. = outcome measurement, Prog. Meas. = prognostic factor measurement, Pros = prospective, Rand. Seq. = random sequence generation, SMD = Standardised mean difference, Stats. = statistical analysis, Study Pop. = study population

## Supplementary table 88 – Description of original studies of yoga in gout

Table – Yoga (gout), description of included studies

| Author (date) [country]                       | Study design | Inclusion criteria                                                                                                                                                                                                                                                | Exposure detail                                  | N              | Age years, mean (SD)                                                           | N (%) female               | Funders           |
|-----------------------------------------------|--------------|-------------------------------------------------------------------------------------------------------------------------------------------------------------------------------------------------------------------------------------------------------------------|--------------------------------------------------|----------------|--------------------------------------------------------------------------------|----------------------------|-------------------|
| Adithya Acharya (2013) [India] <sup>250</sup> | RCT          | Aged 20-65, symptom duration <10 years, gout symptoms, no tophi, not complete joint destruction<br>Exclusions: hemarthrosis [sic], Kochs arthritis, septic arthritis, chronic renal failure, severe systemic multiorgan syndrome, basti ayogya, siravyadha ayogya | 1) Guduchi Siddha Yoga Basti<br>p) blood letting | 1) 20<br>p) 20 | 21-30/31-40/41-50/51-60/61-70:<br>1) 5 / 9 / 3 / 0 / 3<br>p) 2 / 6 / 7 / 5 / 0 | 1) 6 (30.0)<br>p) 9 (45.0) | <b>No funding</b> |

N = number, RCT = randomised controlled trial, SD = standard deviation

## Supplementary table 89 – Results from reviews and interventional studies of yoga in gout

Table – Yoga (gout), results and quality assessment

| Outcome (outcome measure) | Study (date) [study type]                   | Standardised result, SMD (95% CI) unless otherwise stated | Natural result                                                                                                                                                                                     | AMSTAR2 quality | Rand. Seq. | Alloc. Conc. | Blind. Part. | Blind. Asses. |
|---------------------------|---------------------------------------------|-----------------------------------------------------------|----------------------------------------------------------------------------------------------------------------------------------------------------------------------------------------------------|-----------------|------------|--------------|--------------|---------------|
| Pain                      | Adithya Acharya (2013) [RCT] <sup>250</sup> |                                                           | <u>Pricking pain, 0-3, BL / 24, N(%)</u><br>1) 0=0(0), 1=0(0), 2=13 (65), 3=7(35) / 0=6(30), 1=13 (65), 2=1(5), 3=0(0)<br>p) 0=0(0), 1=0(0), 2=14(70), 3=6(30) / 0=2(10), 1=17(85), 2=1(5), 3=0(0) |                 | H/UC       | H/UC         | H/UC         | L             |
| Swelling                  | Adithya Acharya (2013) [RCT] <sup>250</sup> |                                                           | <u>Swelling, 0-2, BL /24 weeks, N(%)</u><br>1) 0=0(0), 1=14(70), 2=6(30) / 0=5(25), 1=14(70), 2=1(5)<br>p) 0=0(0), 1=7(35), 2=13(65) / 0=0(0), 1=20(100), 2=0(0)                                   |                 | H/UC       | H/UC         | H/UC         | L             |
| Tenderness                | Adithya Acharya (2013) [RCT] <sup>250</sup> |                                                           | <u>Tenderness, 0-3, BL /24 weeks, N(%)</u><br>1) 0=0(0), 1=6(30), 2=14(70), 3=0(0) / 0=12(60), 1=8(40), 2=0(0), 3=0(0)<br>p) 0=0(0), 1=13(65), 2=7(35), 3=0(0) / 0=15(75), 1=5(25), 2=0(0), 3=0(0) |                 | H/UC       | H/UC         | H/UC         | L             |
| Uric acid                 | Adithya Acharya (2013) [RCT] <sup>250</sup> |                                                           | <u>Serum uric acid, BL /24 weeks, mean(SD)</u><br>1) 8.43 (1.12) / 6.63 (1.32)<br>p) 8.55 (1.53) / 7.41 (1.58)                                                                                     |                 | H/UC       | H/UC         | H/UC         | L             |

Alloc. Conc. = allocation concealment, AMSTAR2 = Assessing the Methodological Quality of Systematic Reviews, BL = baseline, Blind. Asses. = Blinded assessors, Blind. Part. = blinded participants, CI = confidence interval, H/UC = high / unclear risk of bias, L = low risk of bias, Rand. Seq. = random sequence generation, RCT = randomised controlled trial, SD = standard deviation

## Supplementary table 90 – Description of studies of assessing weight and outcomes in OA

Table – Osteoarthritis, description of reviews

| Authors (date)                   | Review type | Study type included                 | Type of OA | Exposure detail                                                                | Number of studies included | Funders                                                             |
|----------------------------------|-------------|-------------------------------------|------------|--------------------------------------------------------------------------------|----------------------------|---------------------------------------------------------------------|
| Pozzobon (2018) <sup>18</sup>    | MA          | Observational studies               | Hip, knee  | Obesity before arthroplasty                                                    | 31                         | <b>No funding</b>                                                   |
| Corbett (2013) <sup>15</sup>     | MA          | RCTs                                | Knee       | Weight loss interventions                                                      | 5                          | <b>Government</b> (NIHR)                                            |
| de Rooij (2016) <sup>38</sup>    | SR          | Prospective cohorts                 | Hip        | Studies investigating the association between BMI and outcomes                 | 15                         | <b>Professional body</b> (Royal Dutch Society for Physical Therapy) |
| de Rooij (2016) <sup>22</sup>    | SR          | Observational studies               | Knee       | Studies investigating the association between BMI and outcomes                 | 58                         | <b>Professional body</b> (Royal Dutch Society for Physical Therapy) |
| Bastick (2015) <sup>23</sup>     | SR          | Observational studies               | Knee       | Studies investigating the association between BMI and radiographic progression | 79                         | <b>Charity</b> (Dutch Arthritis Foundation)                         |
| Le Quintrec (2014) <sup>24</sup> | SR          | RCTs                                | Hip, knee  | Weight loss interventions                                                      | 8                          | <b>Not reported</b> – Authors declared no conflict of interest      |
| Fernandes (2013) <sup>36</sup>   | SR          | MA, SR, RCTs, observational studies | Hip, knee  | Weight loss interventions                                                      | 23                         | <b>Professional body</b> (EULAR)                                    |

BMI = body mass index, EULAR = European League Against Rheumatism, MA = meta-analysis, NIHR = National Institute for Health Research, OA = osteoarthritis, RCT = randomised controlled trial, SR = systematic review

Table – Osteoarthritis, description of included studies

| Author (date) [country]                   | OA site   | Study design | Inclusion criteria                                                                                                                                                                                                                                                                                                                                                                                                                                                                                                                                                                                                                                                              | Exposure / intervention detail                                                                                                                                                                                                                                                                                                                                           | N                                    | Age, mean (SD) years                                              | N (%) female                                 | Funders                                                                                                  |
|-------------------------------------------|-----------|--------------|---------------------------------------------------------------------------------------------------------------------------------------------------------------------------------------------------------------------------------------------------------------------------------------------------------------------------------------------------------------------------------------------------------------------------------------------------------------------------------------------------------------------------------------------------------------------------------------------------------------------------------------------------------------------------------|--------------------------------------------------------------------------------------------------------------------------------------------------------------------------------------------------------------------------------------------------------------------------------------------------------------------------------------------------------------------------|--------------------------------------|-------------------------------------------------------------------|----------------------------------------------|----------------------------------------------------------------------------------------------------------|
| Sadeghi (2019) [Iran] <sup>251</sup>      | Knee      | RCT          | ACR knee OA, KL grade I-II, OA considered through mechanical knee pain, joint crepitation and radiographic signs<br>Exclusions: Disease other than OA, knee / hip prosthesis, consumption of glucosamine/chondroitin through last 6 months, overuse of sedative drugs, KL grade III-IV, rheumatic disease history                                                                                                                                                                                                                                                                                                                                                               | 1) Suggested to eat less starch, rice, spaghetti, fatty goods, solid and liquid oil<br>p) No suggestion diet alterations                                                                                                                                                                                                                                                 | 1) 31<br>p) 31                       | 1) 48 (8.1)<br>p) 44.5 (8.9)                                      | 1) 28 (90.3)<br>p) 28 (90.3)                 | <b>University</b> (Zanjan University of Medical Science)                                                 |
| O'Brien (2018) [Australia] <sup>252</sup> | Knee      | RCT          | Primary complaint of pain due to knee OA last >3 months, aged ≥18 years, BMI 27-40, average pain intensity 3/4 on 10 point scale over past week, moderate interference in daily living, access to telephone<br>Exclusions: Known or suspected serious pathology as underlying cause of knee pain, previous obesity surgery, participating in commercial weight loss program, knee surgery in last 6 months or planned, unable to adapt to program due to living arrangements, medical conditions precluding safe participation in exercise, unable to speak English                                                                                                             | 1) Telephone intervention – brief advice and education about benefits of weight loss / physical activity for OA, then referred to generic weight loss service which supported people to make lifestyle improvements (diet, physical activity)<br>p) Usual care                                                                                                           | 1) 59<br>p) 60                       | 1) 63.0 (11.1)<br>p) 60.2 (13.9)                                  | 1) 39 (66.1)<br>p) 35 (58.3)                 | <b>Industry</b> (Hunter Medical Research), <b>University</b> (University of Newcastle)                   |
| Allen (2017) [USA] <sup>253</sup>         | Hip, knee | Cluster RCT  | OA hip or knee based on radiographic evidence in medical record or met ACR criteria plus joint symptoms, BMI ≥25 and not meeting physical activity recommendations<br>Exclusions: Other rheumatologic conditions, recent hip/knee surgery, waitlist for arthroplasty, recent hospitalization for cardiovascular or cerebrovascular events, severe neurological or psychiatric events, severe memory loss, terminal illness, nursing home residence, severe hearing or speech impairment, blindness, participation another OA intervention, current pregnancy, no primary care visits at Dukes in past 18 months, other health conditions that would prohibit sage participation | Telephone based intervention – goal setting and action planning, patients received educational materials, exercise video and audio CD. Practices randomised to intervention or control and then patients randomised to intervention creating four groups:<br>1) Patient intervention<br>2) Practice intervention<br>3) Patients + practice intervention<br>p) Usual care | 1) 128<br>2) 140<br>3) 140<br>p) 129 | 1) 63.9 (9.3)<br>2) 62.6 (9.6)<br>3) 62.7 (9.3)<br>p) 63.9 (10.2) | 1) 72.7%<br>2) 75.7%<br>3) 75.7%<br>p) 71.3% | <b>Government</b> (NIH, Department of Veterans Affairs Health Services Research and Development Service) |

ACR = American College of Rheumatology, BMI = body mass index, KL = Kellgren-Lawrence, N = number, NIH = National Institutes of Health, OA = osteoarthritis, RCT = randomised controlled trial, SD = standard deviation, USA = United States of America



Table – Osteoarthritis, description of included studies

| Author (date) [country]                     | OA site   | Study design | Inclusion criteria                                                                                                                                                                                                                                                                                                                                                                                                                                                                                                                                                                                                                 | Exposure / intervention detail                                                                                                                                                     | N                          | Age, mean (SD) years                            | N (%) female                                    | Funders                                                                                                                                                                                                                         |
|---------------------------------------------|-----------|--------------|------------------------------------------------------------------------------------------------------------------------------------------------------------------------------------------------------------------------------------------------------------------------------------------------------------------------------------------------------------------------------------------------------------------------------------------------------------------------------------------------------------------------------------------------------------------------------------------------------------------------------------|------------------------------------------------------------------------------------------------------------------------------------------------------------------------------------|----------------------------|-------------------------------------------------|-------------------------------------------------|---------------------------------------------------------------------------------------------------------------------------------------------------------------------------------------------------------------------------------|
| Allen (2016) [USA] <sup>254</sup>           | Hip, knee | Cluster RCT  | Hip (radiographic) or knee (radiographic or ACR criteria) OA, joint symptoms present for most days in past month or patients used medication for these symptoms on most days, BMI ≥25<br>Exclusions: Other rheumatologic conditions, recent hip/knee surgery, waitlist for arthroplasty, recent hospitalization for cardiovascular or cerebrovascular events, severe neurological or psychiatric events, severe memory loss, terminal illness, nursing home residence, severe hearing or speech impairment, blindness, participation another OA intervention, current pregnancy, no primary care visits at Dukes in past 18 months | 1) Patient intervention – telephone calls to reduced weight loss, Provider intervention – training on when to refer patients<br>p) Usual care                                      | 1) 151<br>p) 149           | 1) 60.4 (9.4)<br>p) 61.7 (9.0)                  | 1) 13.2%<br>p) 5.4%                             | <b>Government</b> (Department of Veterans Affairs, Health Services Research and Development Service)                                                                                                                            |
| Christensen (2015) [Denmark] <sup>255</sup> | Knee      | RCT          | Aged ≥50 years, confirmed knee OA, pain and on standing radiographs in at least 1 joint compartment [sic]<br>Exclusions: lack of motivation to lose weight, inability to speak Danish, planned anti-obesity surgery, total knee alloplasty [sic], receiving pharmacological treatment for obesity                                                                                                                                                                                                                                                                                                                                  | All received 16 week intensive dietary therapy, then randomised to weight maintenance program<br>1) Dietary program – formula products<br>2) Exercise 3x per week<br>p) usual care | 1) 64<br>2) 64<br>p) 64    | 1) 63.0 (6.5)<br>2) 62.9 (5.8)<br>p) 61.7 (6.8) | 1) 52 (81.3)<br>2) 52 (81.3)<br>p) 51 (79.7)    | <b>Charity</b> (Oak, Velux, Augustinus, A. P. Moller, Horslev, Bjarne Jensen and Ases and Ejnar Danielsens's, Foundations), <b>Industry</b> (Cambridge Weight Plan), <b>Professional bodies</b> (Danish rheumatism association) |
| Hunter (2015) [USA] <sup>256</sup>          | Knee      | RCT          | Aged ≥55 years, ambulatory, KL grade II-III, radiographic knee OA, pain on most days due to OA, BMI ≥27 & ≤41, sedentary lifestyle                                                                                                                                                                                                                                                                                                                                                                                                                                                                                                 | 1) Diet induced weight loss (800-1000kcal per day)<br>2) Exercise – 60 min sessions, 3x per week<br>3) Diet + exercise<br>[Additional outcomes of Messier 2013 <sup>26</sup>       | 1) 152<br>2) 150<br>3) 152 | 1) 66 (6)<br>2) 66 (6)<br>3) 65 (6)             | 1) 108 (71.1)<br>2) 108 (72.0)<br>3) 109 (71.7) | <b>Government</b> (NIH), <b>Industry</b> (General Nutrition Centers, Inc.)                                                                                                                                                      |
| Saraboon (2015) [Thailand] <sup>257</sup>   | Knee      | RCT          | OA knee criteria, BMI 23.00-29.99, mild to moderate knee OA, no cognitive deficits, intention to complete study                                                                                                                                                                                                                                                                                                                                                                                                                                                                                                                    | 1) Health education program, quadriceps muscle exercises, home visit program<br>p) OA knee booklet and video                                                                       | 1) 40<br>p) 40             | 1) 67.5 (7.3)<br>p) 67.3 (6.3)                  | 1) 37 (92.5)<br>p) 37 (92.5)                    | <b>Not reported</b> – Authors declared no conflict of interest                                                                                                                                                                  |

BMI = body mass index, kcal = kilocalories, KL = Kellgren-Lawrence, N = number, OA = osteoarthritis, RCT = randomised controlled trial, SD = standard deviation, USA = United States of America

Table – Osteoarthritis, description of included studies

| Author (date)<br>[country]                   | OA site | Study design | Inclusion criteria                                                                                                                                                                                                                                                                                                                                                                                                                                                                                                     | Exposure / intervention detail                                                                                                                                                                                                                                   | N                                | Age, mean (SD) years                                                | N (%) female                                                 | Funders                                                                                                                                                                                                                         |
|----------------------------------------------|---------|--------------|------------------------------------------------------------------------------------------------------------------------------------------------------------------------------------------------------------------------------------------------------------------------------------------------------------------------------------------------------------------------------------------------------------------------------------------------------------------------------------------------------------------------|------------------------------------------------------------------------------------------------------------------------------------------------------------------------------------------------------------------------------------------------------------------|----------------------------------|---------------------------------------------------------------------|--------------------------------------------------------------|---------------------------------------------------------------------------------------------------------------------------------------------------------------------------------------------------------------------------------|
| Beavers (2014)<br>[USA] <sup>258</sup>       | Knee    | RCT          | Ambulatory, community dwelling persons aged 55 years or older with: KL II-III of knees, pain on most days due to knee OA, BMI 27-41, sedentary lifestyle                                                                                                                                                                                                                                                                                                                                                               | 1) Diet induced weight loss (800-1000kcal per day)<br>2) Exercise – 60 min sessions, 3x per week<br>3) Diet + exercise<br>[Additional outcomes of Messier 2013 <sup>26</sup> ]                                                                                   | 1) 88<br>2) 95<br>3) 101         | 1) 66.0 (6.0)<br>2) 65.8 (6.3)<br>3) 66.1 (6.4)                     | 1) 61 (69.3)<br>2) 71 (74.7)<br>3) 77 (76.2)                 | <b>Government</b> (National Institute of Arthritis and Musculoskeletal and Skin Diseases),<br><b>University</b> (Wake Forest University)                                                                                        |
| Henriksen (2014)<br>[Denmark] <sup>259</sup> | Knee    | RCT          | Aged >50 years, clinical knee OA from radiograph and BMI >30<br>Exclusions: Lack of motivation to lose weight, inability to speak Danish, planned anti-obesity surgery, receiving pharmacological obesity treatment                                                                                                                                                                                                                                                                                                    | Given intensive diet intervention inducing 10% weight loss – patients then enrolled in maintenance study<br>1) Continued diet intervention (1 formula product per day<br>2) Knee exercises<br>p) No attention control                                            | 1) 60<br>2) 63<br>p) 64          | 1) 64.6 (6.6)<br>2) 64.4 (5.8)<br>p) 63.1 (6.8)                     | Not reported                                                 | <b>Charity</b> (Oak, Velux, Augustinus, A. P. Moller, Horslev, Bjarne Jensen and Ases and Einar Danielsens's, Foundations), <b>Industry</b> (Cambridge Weight Plan), <b>Professional bodies</b> (Danish rheumatism association) |
| Messier (2013)<br>[USA] <sup>26</sup>        | Knee    | RCT          | Ambulatory, community dwelling persons aged 55 years or older with: KL II-III of knees, pain on most days due to knee OA, BMI 27-41, sedentary lifestyle                                                                                                                                                                                                                                                                                                                                                               | 1) Diet: Loosing 10% of BL weight with partial meal replacement (women = 1100kcal/day, men = 1200 kcal/day)<br>2) Exercise: 1 hour per session, 3 days per week<br>3) Diet + exercise                                                                            | 1) 152<br>2) 150<br>3) 152       | 1) 66 (6)<br>2) 66 (6)<br>3) 65 (6)                                 | 1) 108 (71.1)<br>2) 108 (72.0)<br>3) 109 (71.7)              | <b>Government</b> (NIH)                                                                                                                                                                                                         |
| Somers (2012)<br>[USA] <sup>260</sup>        | Knee    | RCT          | Pain most day of the months, aged >18, BMI 25-42, ACR criteria for OA and erosions on radiographs, No other major weight bearing joint affected by OA, OA considered medical condition that contributed most to function limitation, able to read/speak English<br>Exclusions: medical condition that increased risk of significant adverse health event during physical activity, non-OA arthropathy/arthritis disorder, regular use of oral corticosteroids, participating in regular exercise / weight-loss program | 1) Pain coping skills training<br>2) Behavioural weight loss – group sessions focussing on lifestyle, exercise, attitudes, relationships, nutrition, calorie goal setting. Also exercise program<br>3) Pain coping + behavioural weight loss<br>p) standard care | 1) 60<br>2) 59<br>3) 62<br>p) 51 | 1) 58.1 (11.3)<br>2) 58.3 (11.0)<br>3) 57.5 (9.4)<br>p) 57.9 (10.1) | 1) 40 (66.7)<br>2) 47 (79.7)<br>3) 57 (91.9)<br>p) 40 (78.4) | <b>Government</b> (NIH)                                                                                                                                                                                                         |

BMI = body mass index, kcal = kilocalories, KL = Kellgren-Lawrence, N = number, NIH = National Institutes of Health, OA = osteoarthritis, RCT = randomised controlled trial, SD = standard deviation, USA = United States of America

Table – Osteoarthritis, description of included studies

| Author (date) [country]                     | OA site | Study design | Inclusion criteria                                                                                                                                                                                                                                                                                                                                  | Exposure / intervention detail                                                                                                                  | N                | Age, mean (SD) years             | N (%) female                   | Funders                                                                                                                                                                                                                                   |
|---------------------------------------------|---------|--------------|-----------------------------------------------------------------------------------------------------------------------------------------------------------------------------------------------------------------------------------------------------------------------------------------------------------------------------------------------------|-------------------------------------------------------------------------------------------------------------------------------------------------|------------------|----------------------------------|--------------------------------|-------------------------------------------------------------------------------------------------------------------------------------------------------------------------------------------------------------------------------------------|
| Bliddal (2011) [Denmark] <sup>261</sup>     | Knee    | RCT          | Knee OA ACR criteria, aged >18 years, desire to lose weight<br>Exclusions: History of other rheumatic diseases, diabetes or other endocrine disease, substantial abnormalities in haematological, hepatic, renal or cardiac function<br>[long-term extension of Christensen 2005 <sup>262</sup> ]                                                   | 1) Intensive weight loss diet using formula (810kcal/day)<br>p) Moderate conventional hypo-energetic, high protein diet (approx. 1200kcal/day)  | 1) 44<br>p) 45   | 1) 61.1 (11.1)<br>p) 64.1 (10.5) | 1) 39 (88.6)<br>p) 40 (88.9)   | <b>Charity</b> (Oak, Horslev and Bjarne Jensen foundations), <b>Hospital</b> (Frederiksberg hospital), <b>Professional body</b> (Danish Rheumatism Association)                                                                           |
| Gudbergesen (2011) [Denmark] <sup>263</sup> | Knee    | RCT          | Aged ≥18 years, diagnosis of primary knee OA, no other rheumatic diseases, no substantial haematological, hepatic, renal, cardiac or endocrine abnormalities, BMI ≥28, motivation for weight-loss, fluent in Danish                                                                                                                                 | 1) Low energy diet for 8 weeks, then hypoenergetic and high protein diet for 24 weeks<br>p) 2 hours nutrition advice session only               | 1) 15<br>p) 15   | 62 (6.8)                         | 1) 15 (100)<br>p) 15 (100)     | <b>Charity</b> (Oak, Velux, Augustinus, A. P. Moller, Horslev, Bjarne Jensen and Ases and Ejnar Danielsen's, Foundations), <b>Industry</b> (Cambridge Health and Weight Plan), <b>Professional bodies</b> (Danish rheumatism association) |
| Riecke (2010) [Denmark] <sup>264</sup>      | Knee    | RCT          | ACR OA knee criteria, BMI >30, OA radiologically verified<br>Exclusions: previous/planned total knee replacement or other surgery/injections in knee in last 3 months, anti-obesity pharmaceutical treatment, lack of motivation to lose weight, inability to speak Danish fluently, mental state impeding compliance                               | 1) Low calorie diet (810 kcal per day)<br>2) Very low calorie diet (415 kcal per day)<br>Diets consisted of meal replacement powder             | 1) 96<br>2) 96   | 1) 63.3 (6.3)<br>2) 61.8 (6.4)   | 1) 77 (80.2%)<br>2) 78 (81.3%) | <b>Charity</b> (Oak, Velux, Augustinus, A. P. Moller, Horslev, Bjarne Jensen and Ases and Ejnar Danielsen's, Foundations), <b>Industry</b> (Cambridge Weight Plan), <b>Professional bodies</b> (Danish rheumatism association)            |
| Ravaud (2009) [France] <sup>265</sup>       | Knee    | Cluster RCT  | aged 45-75 years, ACR knee OA criteria, knee pain 30-70mm on VAS needing treatment with NSAIDs, BMI ≥25 & <35, speaks French<br>Exclusions: Surgery in next 6 months, chronic disease, unable to walk without aid, participating in another nutritional program, electronic implantable device (pacemaker), participating in another clinical trial | 1) 3 goal orientated visits to rheumatologist: (1) inform patients about disease and treatment, (2-3) exercise and weight loss<br>p) Usual care | 1) 146<br>p) 181 | 1) 63.9 (8.1)<br>p) 64.6 (8.3)   | 1) 112 (76.7)<br>p) 132 (72.9) | <b>Industry</b> (Almirall SAS)                                                                                                                                                                                                            |

ACR = American College of Rheumatology, BMI = body mass index, kcal = kilocalories, KL = Kellgren-Lawrence, N = number, NSAIDs = non-steroidal anti-inflammatory drug, OA = osteoarthritis, RCT = randomised controlled trial, SD = standard deviation, VAS = visual analogue scale

Table – Osteoarthritis, description of included studies

| Author (date) [country]                     | OA site | Study design | Inclusion criteria                                                                                                                                                                                                                                                                                                                                                                            | Exposure / intervention detail                                                                                                                                                                                                             | N              | Age, mean (SD) years                        | N (%) female                 | Funders                                                                                                                  |
|---------------------------------------------|---------|--------------|-----------------------------------------------------------------------------------------------------------------------------------------------------------------------------------------------------------------------------------------------------------------------------------------------------------------------------------------------------------------------------------------------|--------------------------------------------------------------------------------------------------------------------------------------------------------------------------------------------------------------------------------------------|----------------|---------------------------------------------|------------------------------|--------------------------------------------------------------------------------------------------------------------------|
| Miller (2008) [USA] <sup>266</sup>          | Knee    | RCT          | BMI >30, aged ≥60 years, Knee pain and self-reported physician diagnosed OA, self-reported difficulty performing at least 1 of the following: lifting and carrying groceries, walking 1/4 mile, getting in and out of a chair, and going up and down stairs<br>Exclusions: Unable to complete intervention, unstable medical condition, condition where rapid weight loss was contraindicated | 1) Aim to lose 10% BL body weight – meal replacements (women = 1100kcal/day, men = 1200 kcal/day), weekly education, behaviour modification, 60 mins 3x per week exercise<br>p) Attention control – met bimonthly for educational sessions | 1) 31<br>p) 36 | Mean (SE)<br>1) 69.8 (1.0)<br>p) 69.5 (1.0) | 1) 64.9%<br>p) 56.7%         | <b>Industry</b> (SlimFast Nutrition Institute), <b>University</b> (Wake Forest University), <b>Government</b> (NIH)      |
| Miller (2006) [USA] <sup>267</sup>          | Knee    | RCT          | BMI ≥30, age ≥60 years, symptomatic knee OA, difficulty performing one of: lifting/carrying groceries, walking ¼ mile, getting in/out of chair, going up/down stairs<br>Exclusions: Unstable medical conditions where rapid weight loss contraindicated, unwilling to modify diet/physical activity, food allergies, living >50 miles from treatment centre, excessive alcohol consumption    | 1) Aim to lose 10% BL body weight – meal replacements (women = 1100kcal/day, men = 1200 kcal/day), weekly education, behaviour modification, 60 mins 3x per week exercise<br>p) Attention control – met bimonthly for educational sessions | 1) 44<br>p) 43 | Mean (SE)<br>1) 69.7 (0.9)<br>p) 69.3 (0.9) | 1) 28 (63.6)<br>p) 26 (60.5) | <b>Industry</b> (SlimFast Nutrition Institute), <b>University</b> (Wake Forest University), <b>Government</b> (NIH)      |
| Christensen (2005) [Denmark] <sup>262</sup> | Knee    | RCT          | ACR OA criteria, KL grade II-III, BMI >28, motivated to lose weight, communicate in Danish<br>Exclusions: History / presence of other rheumatic disease, diabetes and other endocrine disorders, Substantial abnormalities in haematological, hepatic, renal or cardiac functions                                                                                                             | 1) Intensive weight loss diet using formula (810kcal/day)<br>p) Moderate conventional hypo-energetic, high protein diet (approx. 1200kcal/day)                                                                                             | 1) 40<br>p) 40 | 1) 60.5 (11.6)<br>p) 64.6 (10.4)            | 1) 35 (87.5)<br>p) 36 (90.0) | <b>Charity</b> (Oak Foundation), <b>Professional body</b> (Danish Rheumatism Association), <b>Industry</b> (Dansk Droge) |

ACR = American College of Rheumatology, BMI = body mass index, kcal = kilocalories, KL = Kellgren-Lawrence, N = number, OA = osteoarthritis, RCT = randomised controlled trial, SD = standard deviation, USA = United States of America

Table – Osteoarthritis, description of included studies

| Author (date)<br>[country]             | OA site | Study design | Inclusion criteria                                                                                                                                                                                                                                                                                                                                                                                                                                                                                                                                                                                                                                                                                                                                            | Exposure / intervention detail                                                                                                                                                                | N                                | Age, mean (SD) years                                                  | N (%) female                                     | Funders          |
|----------------------------------------|---------|--------------|---------------------------------------------------------------------------------------------------------------------------------------------------------------------------------------------------------------------------------------------------------------------------------------------------------------------------------------------------------------------------------------------------------------------------------------------------------------------------------------------------------------------------------------------------------------------------------------------------------------------------------------------------------------------------------------------------------------------------------------------------------------|-----------------------------------------------------------------------------------------------------------------------------------------------------------------------------------------------|----------------------------------|-----------------------------------------------------------------------|--------------------------------------------------|------------------|
| Messier (2004)<br>[USA] <sup>25</sup>  | Knee    | RCT          | Aged ≥60 years, BMI ≥28, knee pain most days of the month, sedentary activity patent, KL grade I-III, willingness to undergo intervention, self-reported difficulty in one of the following activity: walking 1.4 mile, climbing stairs, bending, stooping, kneeling, shopping, house cleaning, getting in/out of bed, standing up from chair, lifting/carrying groceries, getting in/out of bath<br>Exclusions: Serious medical condition precluding safe participation, mini-mental state <24, inability to finish program, inability to walk without cane/device, participation in another study, alcohol consumption of 14 drinks per week, SR segment depression of ≥2 mm at an exercise level of 4 METS or less, hypotension, complex arrhythmia, frail | 1) Exercise only (3x per week, aerobic and muscle strengthening)<br>2) Diet weight loss (reduced and maintain 5% weight loss – education only)<br>3) Diet + exercise<br>p) Usual care         | 1) 82<br>2) 80<br>3) 76<br>p) 78 | Mean (SE)<br>1) 68 (0.7)<br>2) 69 (0.8)<br>3) 76 (0.8)<br>p) 69 (0.1) | 1) 72%F<br>2) 74%<br>3) 74%<br>p) 68%            | Government (NIH) |
| Rejeski (2002)<br>[USA] <sup>268</sup> | Knee    | RCT          | Aged ≥60 years, BMI ≥28, knee pain most days of the month, sedentary activity pattern, radiographic evidence of OA, willingness to participate, limitations in at least one of: walking ¼ mile, climbing stairs, bending, stooping, kneeling, shopping, housecleaning, getting out of bed, standing from chair, lifting/carrying groceries, getting in/out of bath<br>Exclusions: Serious medical condition precluding safe participation, mini-mental state <24, inability to finish program, inability to walk without cane/device, participation in another study, alcohol consumption of 14 drinks per week, frail                                                                                                                                        | 1) Diet – goal 5% weight loss<br>2) Exercise – 3x per week, aerobic and muscle strengthening. First four months supervised then at home<br>3) Diet + exercise<br>p) Healthy-lifestyle control | 1) 73<br>2) 69<br>3) 68<br>p) 68 | 1) 68.1 (5.5)<br>2) 69.0 (6.6)<br>3) 68.5 (5.6)<br>p) 68.6 (6.39)     | 1) 74.07%<br>2) 73.75%<br>3) 73.33%<br>p) 66.67% | Government (NIH) |

BMI = body mass index, KL = Kellgren-Lawrence, N = number, NIH = National Institutes of Health, OA = osteoarthritis, RCT = randomised controlled trial, SD = standard deviation, SE = standard error, USA = United States of America

Table – Osteoarthritis, description of included studies

| Author (date)<br>[country]             | OA site | Study design | Inclusion criteria                                                                                                                                                                                                                                                                                                                                                                                                                                                                                                                                                                                                                                                                                                                                                                                                                                                                                                                                                                                                                                                                                                                                                                                                                                                                                                                                              | Exposure / intervention detail                                                                                                                                                | N                                                  | Age, mean (SD) years   | N (%) female                | Funders                 |
|----------------------------------------|---------|--------------|-----------------------------------------------------------------------------------------------------------------------------------------------------------------------------------------------------------------------------------------------------------------------------------------------------------------------------------------------------------------------------------------------------------------------------------------------------------------------------------------------------------------------------------------------------------------------------------------------------------------------------------------------------------------------------------------------------------------------------------------------------------------------------------------------------------------------------------------------------------------------------------------------------------------------------------------------------------------------------------------------------------------------------------------------------------------------------------------------------------------------------------------------------------------------------------------------------------------------------------------------------------------------------------------------------------------------------------------------------------------|-------------------------------------------------------------------------------------------------------------------------------------------------------------------------------|----------------------------------------------------|------------------------|-----------------------------|-------------------------|
| Messier (2000)<br>[USA] <sup>269</sup> | Knee    | RCT          | Age ≥60 years, BMI ≥28, knee pain on most days of the month, self-reported difficulty in at least one of the following activities ascribed to knee pain: walking 1/4 mile, climbing stairs, bending, stooping, or kneeling, shopping, housecleaning, or other self-care activities; getting in and out of bed; standing up from a chair; lifting and carrying groceries; or getting in and out of the bathtub, radiographic evidence of tibiofemoral osteoarthritis as determined by a single observer and based on weight-bearing anteroposterior X-rays, willingness to undergo testing and intervention procedures.<br><br>Exclusions: had a serious medical condition that prevented safe participation in an exercise program, planned to leave the area or be admitted to a nursing home within the next 6 months, were unable to walk at least 420 ft in 6 minutes without a cane or other assistive device, were unable to walk on a treadmill without a cane or other assistive device, were participating in a regular exercise program more than one time per week for 20 minutes per session, were participating in another research study, were unable to participate in most of the facility-based intervention, would not be able to complete the protocol, in the opinion of the clinical staff, because of frailty, illness, or other reasons. | 1) Exercise (3x per week, aerobic + muscle strengthening)<br>2) Exercise + diet (aim to lose 6.8kg over 6 months – nutrition classes)                                         | 1) 11<br>2) 13                                     | 1) 69 (5)<br>2) 67 (4) | 1) 7 (63.6)<br>2) 10 (76.9) | <b>Government (NIH)</b> |
| Toda (2001)<br>[Japan] <sup>270</sup>  | Knee    | NRT          | Aged 45-69 years, knee OA as chief complaint                                                                                                                                                                                                                                                                                                                                                                                                                                                                                                                                                                                                                                                                                                                                                                                                                                                                                                                                                                                                                                                                                                                                                                                                                                                                                                                    | 1) NSAIDs only<br>2) NSAIDs + non-weight bearing exercise<br>3) NSAIDs + walking<br>4) NSAIDs + diet<br>5) NSAIDs + diet and strength exercises<br>6) NSAIDs + diet + walking | 1) 52<br>2) 49<br>3) 35<br>4) 29<br>5) 37<br>6) 26 | 61.1 (9.7)             | 100%                        | <b>Not reported</b>     |

BMI = body mass index, N = number, NIH = National Institutes of Health, NRT = non-randomised trial, NSAIDs = non-steroidal anti-inflammatory drug, OA = osteoarthritis, RCT = randomised controlled trial, SD = standard deviation, USA = United States of America

Table – Osteoarthritis, description of included studies

| Author (date) [country]                     | OA site | Study design    | Inclusion criteria                                                                                                                                                                                                                                                                    | Exposure / intervention detail                                                                                                                                                                                                                                                 | N    | Age, mean (SD) years | N (%) female | Funders                                                                                                                                                                                                                        |
|---------------------------------------------|---------|-----------------|---------------------------------------------------------------------------------------------------------------------------------------------------------------------------------------------------------------------------------------------------------------------------------------|--------------------------------------------------------------------------------------------------------------------------------------------------------------------------------------------------------------------------------------------------------------------------------|------|----------------------|--------------|--------------------------------------------------------------------------------------------------------------------------------------------------------------------------------------------------------------------------------|
| Huang (2000) [Taiwan] <sup>271</sup>        | Knee    | NRT             | Knee OA, BMI >25 in men and >30 in women                                                                                                                                                                                                                                              | 1) Weight reduction and diet of <500kcal/day + exercise + acupuncture<br>2) Electrotherapy                                                                                                                                                                                     | 126  | Not reported         | 112 (88.8)   | <b>Not reported</b>                                                                                                                                                                                                            |
| Bartholdy (2019) [Denmark] <sup>272</sup>   | Knee    | Single arm int. | Reanalysis of RCT data, ACR knee OA criteria, KL grade I-III, BMI ≥27, motivation for weight loss<br>Exclusions: planned knee surgery, previous / planned treatment for obesity, current medical or dietary treatment                                                                 | Intensive dietary intervention – full meal replacement diet of 800-1000kcal per day.<br>Also educational sessions                                                                                                                                                              | 124  | 59 (10.3)            | 78 (62.9)    | <b>Industry</b> (Novo Nordisk, Cambridge Weight Plan), <b>Professional body</b> (Danish Physical Therapy Association, Danish Rheumatism Association), <b>Charity</b> (Oak Foundation)                                          |
| Aree-Ue (2017) [Thailand] <sup>273</sup>    | Knee    | Single arm int. | ACR OA criteria, BMI 23-29.99, mild to moderate knee OA, no cognitive impairment<br>Exclusions: secondary knee OA, history of knee surgery, injections in either knee 3 months before study, serious medical conditions (e.g. myocardial infarction) progressive symptom or severe OA | 1) Weight loss program – Health education, muscle exercises, home visits<br>p) Knee booklet and video                                                                                                                                                                          | 74   | 67.6 (6.9)           | 68 (91.9)    | <b>University</b> (Mahidol University)                                                                                                                                                                                         |
| Atukorala (2016) [Australia] <sup>274</sup> | Knee    | Single arm int. | 1986 ACR knee OA criteria, diagnosis supported by radiograph, BMI >28, knee OA symptoms that required referral to an orthopaedic surgeon for evaluation for a knee joint replacement procedure. For this analysis: ≥50 years                                                          | Osteoarthritis Healthy Weight For Life Program (OAHWFL) implements none surgical OA best practice treatment recommendations with a target of losing >5% weight – land and water based exercise, education, eating plan, satisfaction tracking, available support via telephone | 1383 | 64 (8.7)             | 71%          | <b>Government</b> (National Health and Medical Research Council)                                                                                                                                                               |
| Bartels (2014) [Denmark] <sup>275</sup>     | Knee    | Single arm int. | Aged >50 years, BMI ≥30, ACR Knee OA criteria                                                                                                                                                                                                                                         | Formula weight loss diet 415-810kcal/day for 8 weeks and then 8 weeks of 1200kcal/day                                                                                                                                                                                          | 175  | 62.6 (6.3)           | 142 (81.1)   | <b>Charity</b> (Oak, Velux, Augustinus, A. P. Moller, Horslev, Bjarne Jensen and Ases and Ejnar Danielsens's Foundations), <b>Industry</b> (Cambridge Weight Plan), <b>Professional bodies</b> (Danish rheumatism association) |

ACR = American College of Rheumatology, BMI = body mass index, kcal = kilocalories, KL = Kellgren-Lawrence, N = number, NRT = non-randomised trial, OA = osteoarthritis, SD = standard deviation

Table – Osteoarthritis, description of included studies

| Author (date) [country]                       | OA site | Study design    | Inclusion criteria                                                                                                                                                                                                                                                                                                                                                                                      | Exposure / intervention detail                                                                                                                                                                                          | N                         | Age, mean (SD) years                            | N (%) female                                   | Funders                                                                                                                                                                                                                        |
|-----------------------------------------------|---------|-----------------|---------------------------------------------------------------------------------------------------------------------------------------------------------------------------------------------------------------------------------------------------------------------------------------------------------------------------------------------------------------------------------------------------------|-------------------------------------------------------------------------------------------------------------------------------------------------------------------------------------------------------------------------|---------------------------|-------------------------------------------------|------------------------------------------------|--------------------------------------------------------------------------------------------------------------------------------------------------------------------------------------------------------------------------------|
| Paans (2013) [The Netherlands] <sup>276</sup> | Hip     | Single arm int. | Radiological evidence of hip OA, BMI >25 & <40<br>Exclusions: conditions preventing safe participation in exercise, problems with foot/ankle that could prevent exercise, rheumatoid arthritis, inability to walk without assistive device, participation in another study, low chance/inability to finish study, language problems/dementia impeding completing questionnaires, future hip replacement | Exercise and weight-loss intervention.<br>Exercise – individual land group sessions focused on improving aerobic capacity.<br>Weight loss – improve awareness of the importance of change, discuss problems encountered | 30                        | 56.9 (11.9)                                     | 17 (56.7)                                      | <b>University</b> (University of Groningen)                                                                                                                                                                                    |
| Gudbergson (2012) [Denmark] <sup>277</sup>    | Knee    | Single arm int. | Aged >50 years, BMI ≥30, ACR OA criteria<br>Exclusions: lack of motivation for weight reduction, insufficient understanding, planned anti-obesity operation, former/planned knee replacement, pharmacological obesity treatment, medical disease preventing physical training, active joint disease besides OA, significant hip OA, toe/other deformity influencing gait analysis, use of morphine      | 16 week dietary program – nutritional education and diet of normal food plus meal replacements                                                                                                                          | 192                       | 62.5 (6.4)                                      | 155 (80.7%)                                    | <b>Charity</b> (Oak, Velux, Augustinus, A. P. Moller, Horslev, Bjarne Jensen and Ases and Ejnar Danielsens's Foundations), <b>Industry</b> (Cambridge Weight Plan), <b>Professional bodies</b> (Danish rheumatism association) |
| Bihlet (2018) [11 countries] <sup>278</sup>   | Knee    | Pros. Cohort    | Analysis of placebo arm of 2 RCTs, aged 51-80 years, painful OA in target knee, KL grade II-III on target knee and joint space width ≥2                                                                                                                                                                                                                                                                 | BMI                                                                                                                                                                                                                     | 771                       | 64.5 (6.5)                                      | 491 (63.7)                                     | <b>Industry</b> (Novartis)                                                                                                                                                                                                     |
| Han (2018) [USA] <sup>279</sup>               | Knee    | Pros. Cohort    | OA initiative, aged 45-79 years, symptomatic knee OA<br>Exclusions: rheumatoid or inflammatory arthritis, end-stage OA defined as severe joint space narrowing in both knees, and bilateral knee replacements                                                                                                                                                                                           | BMI – continuous                                                                                                                                                                                                        | 1013                      | 61.2                                            | 557 (55.0)                                     | <b>Not reported</b> – Authors declared no conflict of interest                                                                                                                                                                 |
| Jacobs (2018) [USA] <sup>280</sup>            | Knee    | Pros. Cohort    | OA initiative                                                                                                                                                                                                                                                                                                                                                                                           | Patients categorised as:<br>1) Obese<br>2) Obese + depression<br>3) Neither                                                                                                                                             | 1) 285<br>2) 33<br>3) 282 | 1) 60.2 (8.4)<br>2) 59.0 (8.3)<br>3) 63.1 (9.1) | 1) 176 (61.8)<br>2) 24 (72.7)<br>3) 149 (52.8) | <b>No funding</b>                                                                                                                                                                                                              |
| Pelletier (2018) [USA] <sup>281</sup>         | Knee    | Pros. Cohort    | OA initiative – radiographic OA (KL grade ≥ I), received hyaluronic acid                                                                                                                                                                                                                                                                                                                                | BMI – continuous                                                                                                                                                                                                        | 364                       | 66 (9)                                          | 239 (65.7)                                     | <b>Industry</b> (Sanofi, Merck, Novartis, GlaxoSmithKline, Pfizer), <b>Government</b> (NIH)                                                                                                                                    |

BMI = body mass index, KL = Kellgren-Lawrence, N = number, OA = osteoarthritis, RCT = randomised controlled trial, SD = standard deviation, USA = United States of America



Table – Osteoarthritis, description of included studies

| Author (date) [country]                         | OA site | Study design | Inclusion criteria                                                                                                                                                                                                                                                                                                                                                                                                                                                                                                      | Exposure / intervention detail                                     | N   | Age, mean (SD) years                                                                                                  | N (%) female                                                                                                                          | Funders                                                                                                          |
|-------------------------------------------------|---------|--------------|-------------------------------------------------------------------------------------------------------------------------------------------------------------------------------------------------------------------------------------------------------------------------------------------------------------------------------------------------------------------------------------------------------------------------------------------------------------------------------------------------------------------------|--------------------------------------------------------------------|-----|-----------------------------------------------------------------------------------------------------------------------|---------------------------------------------------------------------------------------------------------------------------------------|------------------------------------------------------------------------------------------------------------------|
| Eymard (2017) [France] <sup>282</sup>           | Knee    | Pros. Cohort | Reanalysis of RCT – aged 40-85 years, ACR criteria for OA, failed to response to analgesics and NSAIDs, 3-8 points on 0-10 VAS, KL grade III-IV<br>Exclusions: OA flare with knee OA, tibial plateau or femoral condyle bone attrition, symptomatic hip OA or any other active inflammatory or microcrystal rheumatic disease, excessive varus or valgus knee misalignment (8°), viscosupplementation in the target knee within the previous 9 months, and systemic/IA corticosteroids use within the previous 3 months | BMI – continuous and categorised as obese or not (BMI >30 = obese) | 166 | Mean (95% CI)<br>65.2<br>(63.6, 66.8)                                                                                 | 101 (60.8)                                                                                                                            | <b>Industry</b> (LABRHA)                                                                                         |
| Moyer (2017) [USA] <sup>283</sup>               | Knee    | Pros. Cohort | OA initiative, 25-79 years, undergone sagittal double-echo steady-state acquisitions at baseline and at 2-year follow-up, OA diagnosis (KL grade ≥2), frequent knee symptoms, no knee replacement during FU,                                                                                                                                                                                                                                                                                                            | BMI                                                                | 558 | Varus definite: 60 (8)<br>Varus minor: 63 (11)<br>Neutral: 61 (9)<br>Valgus minor: 64 (11)<br>Valgus definite: 69 (8) | Varus definite: 116 (91.3)<br>Varus minor: 103 (92.8)<br>Neutral: 235 (98.7)<br>Valgus minor: 41 (95.3)<br>Valgus definite: 38 (97.4) | <b>University</b> (University of Western Ontario),<br><b>Professional body</b> (Osteoarthritis Research Society) |
| Bastick (2016) [The Netherlands] <sup>284</sup> | Hip     | Pros. Cohort | Cohort Hip and Cohort Knee (Check) study – pain and/or stiffness of the knee and/or hip, aged 45-65 years, consulted physician for symptoms <6 months ago<br>Exclusions: other pathological conditions that could explain symptoms, comorbidity that would not allow physical evaluation malignancy in last 5 years, inability to understand Dutch                                                                                                                                                                      | BMI – continuous                                                   | 545 | 55.7 (5.2)                                                                                                            | 81%                                                                                                                                   | <b>Professional body</b> (Dutch Arthritis Association)                                                           |

ACR = American College of Rheumatology, BMI = body mass index, KL = Kellgren-Lawrence, N = number, NSAIDs = non-steroidal anti-inflammatory drug, OA = osteoarthritis, SD = standard deviation, USA = United States of America

Table – Osteoarthritis, description of included studies

| Author (date) [country]                    | OA site   | Study design | Inclusion criteria                                                                                                                                                                                                                                                             | Exposure / intervention detail                                                                                                                                                 | N                      | Age, mean (SD) years                 | N (%) female              | Funders                                                                                                                                                                                                                        |
|--------------------------------------------|-----------|--------------|--------------------------------------------------------------------------------------------------------------------------------------------------------------------------------------------------------------------------------------------------------------------------------|--------------------------------------------------------------------------------------------------------------------------------------------------------------------------------|------------------------|--------------------------------------|---------------------------|--------------------------------------------------------------------------------------------------------------------------------------------------------------------------------------------------------------------------------|
| de Rezende (2016) [Brazil] <sup>285</sup>  | Knee      | Pros. Cohort | Aged >45 years, knee OA according to ACR criteria, started treatment in last 6 months, no other RMD, knee pain >30mm<br>Exclusions: Participating in another program with nutritional education, engaging in another clinical trial, undergoing surgery not related to knee OA | BMI – continuous                                                                                                                                                               | 228                    | Not reported                         | 152 (66.7)                | <b>No funding</b>                                                                                                                                                                                                              |
| Beavers (2015) [USA] <sup>286</sup>        | Knee      | Pros. Cohort | Ambulatory, community dwelling persons aged 55 years or older with: KL II-III of knees, pain on most days due to knee OA, BMI 27-41, sedentary lifestyle                                                                                                                       | 1) Diet induced weight loss (800-1000kcal per day)<br>2) Exercise – 60 min sessions, 3x per week<br>3) Diet + exercise<br>[Additional outcomes of Messier 2013 <sup>26</sup> ] | 450                    | 65.6 (6.2)                           | 321 (71.3)                | <b>Government</b> (National Institute of Arthritis and Musculoskeletal and Skin Diseases), <b>University</b> (Wake Forest University)                                                                                          |
| Chatterjee (2015) [USA] <sup>287</sup>     | Knee      | Pros. Cohort | Bone marrow oedema lesions visible on MRI, complete outcome measures, minimum 6 months between injection and assessment, no additional surgery                                                                                                                                 | BMI                                                                                                                                                                            | 22                     | 54.3 (8.05)                          | 9 (40.9)                  | <b>Not reported</b> – Authors declared no conflict of interest                                                                                                                                                                 |
| Karsdal (2015) [Denmark] <sup>288</sup>    | Knee      | Pros. Cohort | RCT reanalysis - ACR OA criteria, KL grade II-III, functional class I-III, joint space width ≥2mm, significant pain (WOMAC pain ≥150mm)                                                                                                                                        | BMI categories: Quartiles                                                                                                                                                      | 2206                   | 64.4 (6.8)                           | 1430 (64.8)               | <b>Industry</b> (Nordic Bioscience, CCB, Novartis, Merck)                                                                                                                                                                      |
| Kobayashi (2015) [Japan] <sup>289</sup>    | Hip       | Pros. Cohort | Hips with confirmed dysplastic change on x-ray                                                                                                                                                                                                                                 | BMI – continuous                                                                                                                                                               | 57                     | 50.8 (11.3)                          | 49 (86.0)                 | <b>Not reported</b> – Authors declared no conflict of interest                                                                                                                                                                 |
| Magnusson (2015) [Norway] <sup>290</sup>   | Hand      | Pros. Cohort | Oslo hand OA cohort, aged 50-70 years, hand OA diagnosis, no inflammatory disease                                                                                                                                                                                              | BMI – continuous                                                                                                                                                               | 103                    | 61.6 (5.6)                           | 94 (91.3)                 | <b>Government</b> (South-Eastern Norway Regional Health Authority)                                                                                                                                                             |
| Gudbergson (2013) [Denmark] <sup>291</sup> | Knee      | Pros. Cohort | Reanalysis of RCT, Aged >50 years, BMI ≥30, primary knee OA                                                                                                                                                                                                                    | 16 week dietary program - nutritional education and a diet of normal food plus meal replacements. 8 weeks of intensive weight loss then 8 weeks of part formula part food diet | 175                    | 62.7 (6.3)                           | 136 (77.7)                | <b>Charity</b> (Oak, Velux, Augustinus, A. P. Moller, Horslev, Bjarne Jensen and Ases and Ejnar Danielsens's Foundations), <b>Industry</b> (Cambridge Weight Plan), <b>Professional bodies</b> (Danish rheumatism association) |
| Perrot (2013) [France] <sup>292</sup>      | Hip, knee | Pros. Cohort | Hip or knee OA (ACR criteria), pain in last 24 hours ≥3 out of 10                                                                                                                                                                                                              | BMI categories: <18.5, 18.5-25, 25-30, ≥30                                                                                                                                     | hip: 808<br>Knee: 1606 | Hip: 68.0 (8.2)<br>Knee : 66.9 (9.0) | Hip: 50.7%<br>Knee: 49.3% | <b>Industry</b> (Sanofi France)                                                                                                                                                                                                |

BMI = body mass index, kcal = kilocalories, KL = Kellgren-Lawrence, MRI = magnetic resonance imaging, N = number, OA = osteoarthritis, pros. = prospective, RCT = randomised controlled trial, SD = standard deviation, USA = United States of America, WOMAC = Western Ontario and McMaster Universities Osteoarthritis Index

Table – Osteoarthritis, description of included studies

| Author (date) [country]                                  | OA site         | Study design | Inclusion criteria                                                                                                                                                                                                                                                                                                                       | Exposure / intervention detail                                                                                                       | N                                                                        | Age, mean (SD) years                                                                                   | N (%) female                                                                                         | Funders                                                                             |
|----------------------------------------------------------|-----------------|--------------|------------------------------------------------------------------------------------------------------------------------------------------------------------------------------------------------------------------------------------------------------------------------------------------------------------------------------------------|--------------------------------------------------------------------------------------------------------------------------------------|--------------------------------------------------------------------------|--------------------------------------------------------------------------------------------------------|------------------------------------------------------------------------------------------------------|-------------------------------------------------------------------------------------|
| Coffman (2012) [USA] <sup>293</sup>                      | Hand, hip, knee | Pros. Cohort | Physician diagnosis of OA in hand, hip or knee radiographs, self-reported OA symptom on most days in at least 1 month of last year                                                                                                                                                                                                       | Self-reported BMI                                                                                                                    | 157                                                                      | Not reported                                                                                           | 81 (51.6)                                                                                            | <b>Not reported</b>                                                                 |
| Miyazaki (2012) [Japan] <sup>294</sup>                   | Knee            | Pros. Cohort | Aged >60 years, knee pain during some daily activities, no knee replacement surgery during follow-up<br>Exclusions: symptomatic musculoskeletal disorders other than those affecting knee joints, history or major trauma/sports injury to knee, rheumatoid arthritis, gout/pseudogout, autoimmune disease, other major systemic disease | BMI – continuous                                                                                                                     | 84                                                                       | 72.3 (3.1)                                                                                             | 78 (92.9)                                                                                            | <b>Not reported</b>                                                                 |
| Rabago (2012) [USA] <sup>295</sup>                       | Knee            | Pros. Cohort | Data from RCT but analysed as a cohort, ACR knee OA, existing radiograph within 5 years, tenderness of ≥1 anterior knee structures, moderate-severe knee pain                                                                                                                                                                            | BMI – continuous                                                                                                                     | 36                                                                       | 60 (8.7)                                                                                               | 21 (58.3)                                                                                            | <b>Government</b> (NIH, National Center for Complementary and Alternative Medicine) |
| Sands (2012) [N. / S. America and Europe] <sup>296</sup> | Hip, knee       | Pros. Cohort | Reanalysis of RCT comparing daily vs celecoxib treatment only when flaring, aged 18-80 years, knee or hip OA criteria                                                                                                                                                                                                                    | 1) Celecoxib daily – stratified into BMI<30 and BMI ≥30<br>2) Celecoxib when patient is flaring – stratified into BMI<30 and BMI ≥30 | 1) BMI <30: 209<br>1) BMI ≥30: 222<br>2) BMI <30: 205<br>2) BMI ≥30: 222 | 1) BMI <30: 59.2 (10.2)<br>1) BMI ≥30: 57.8 (9.8)<br>2) BMI <30: 58.9 (10.3)<br>2) BMI ≥30: 58.6 (9.0) | 1) BMI <30: 145 (69.4)<br>1) BMI ≥30: 172 (77.5)<br>2) BMI <30: 149 (72.7)<br>2) BMI ≥30: 154 (69.4) | <b>Industry</b> (Pfizer)                                                            |

ACR = American College of Rheumatology, BMI = body mass index, N = number, NIH = National Institutes of Health, OA = osteoarthritis, pros. = prospective, RCT = randomised controlled trial, SD = standard deviation, USA = United States of America

Table – Osteoarthritis, description of included studies

| Author (date) [country]                                | OA site   | Study design | Inclusion criteria                                                                                                                                                                                                                                                                                                                                                                                                                                              | Exposure / intervention detail                                                                                       | N                          | Age, mean (SD) years                                  | N (%) female                                       | Funders                                                                                                                                                       |
|--------------------------------------------------------|-----------|--------------|-----------------------------------------------------------------------------------------------------------------------------------------------------------------------------------------------------------------------------------------------------------------------------------------------------------------------------------------------------------------------------------------------------------------------------------------------------------------|----------------------------------------------------------------------------------------------------------------------|----------------------------|-------------------------------------------------------|----------------------------------------------------|---------------------------------------------------------------------------------------------------------------------------------------------------------------|
| Bartlett (2011) [N. America and Europe] <sup>297</sup> | Knee      | Pros. Cohort | Placebo arm of KOSTAR trial, signal knee pain due to OA on most days during 1 month, aged >50 years, morning knee stiffness <30 mins, knee crepitus according to ACR knee OA criteria<br>Exclusions: Inflammatory arthritis, BMI >40, cancer in last 10 years, tetracycline use within 6 months, hyaluronan injections within 3 months, calcitonin or fluoride use within 6 months, prior use of bisphosphonates within 12 months or for 60 days ever           | BMI – continuous                                                                                                     | 626                        | 61.9 (8.9)                                            | 439 (70.1)                                         | <b>Industry</b> (Procter & Gamble), <b>University</b> (Johns Hopkins Arthritis Center Discovery Fund)                                                         |
| Bingham (2011) [USA] <sup>298</sup>                    | Hip, knee | Pros. Cohort | reanalysis of an RCT of etoricoxib and celecoxib – aged ≥40 years, symptom duration > 6 months, functional class I-III, required NSAIDs, prior NSAID users must have pain walking on flat surface <80mm on VAS, and after NSAID washout, flare scores defined by a minimum score of 40 mm with an increase of 15 mm from screening level, and investigator global assessment of disease status (IGADS) worsening of at least 1 point on a 5-point Likert scale. | BMI – continuous<br>Three treatment arms, each analysed separately<br>Etoricoxib (E)<br>Celecoxib (C)<br>Placebo (P) | E) 475<br>C) 488<br>P) 244 | E) 62.0 (9.9)<br>C) 62.4 (9.4)<br>P) 61.9 (9.2)       | E) 323 (68.0)<br>C) 321 (65.8)<br>P) 159 (65.2)    | <b>Industry</b> (Merck)                                                                                                                                       |
| Nishimura (2011) [Japan] <sup>299</sup>                | Knee      | Pros. Cohort | Aged ≥65 years                                                                                                                                                                                                                                                                                                                                                                                                                                                  | BMI – continuous                                                                                                     | 92                         | Progression: 70.7 (4.7)<br>No progression: 71.6 (5.0) | Progression: 3 (13.6)<br>No progression: 53 (75.7) | <b>No funding</b>                                                                                                                                             |
| Richette (2011) [France] <sup>300</sup>                | Knee      | Pros. Cohort | Having obesity surgery, KL grade II-IV of knee, BMI ≥40 or ≥35 with ≥1 comorbidity (hypertension, diabetes, dyslipidaemia, obstructive sleep apnoea syndrome)                                                                                                                                                                                                                                                                                                   | Gastric bypass surgery                                                                                               | 44                         | 44 (10.3)                                             | 36 (81.8)                                          | <b>Hospital</b> (Assistance Publique-Hôpitaux de Paris), <b>Government</b> (European community), <b>Professional body</b> (Association Rhumatisme et Travail) |

ACR = American College of Rheumatology, BMI = body mass index, KL = Kellgren-Lawrence, N = number, NSAIDs = non-steroidal anti-inflammatory drug, OA = osteoarthritis, pros. = prospective, SD = standard deviation, USA = United States of America,

Table – Osteoarthritis, description of included studies

| Author (date) [country]                       | OA site        | Study design | Inclusion criteria                                                                                                                                                                                                                                                                                                                 | Exposure / intervention detail                                                                                                                                | N                   | Age, mean (SD) years                                | N (%) female            | Funders                                                                                     |
|-----------------------------------------------|----------------|--------------|------------------------------------------------------------------------------------------------------------------------------------------------------------------------------------------------------------------------------------------------------------------------------------------------------------------------------------|---------------------------------------------------------------------------------------------------------------------------------------------------------------|---------------------|-----------------------------------------------------|-------------------------|---------------------------------------------------------------------------------------------|
| Woollard (2011) [USA] <sup>301</sup>          | Knee           | Pros. Cohort | Re-analysis of an RCT – inclusion for RCT: KL grade $\geq 2$ , $\geq 1$ compartment of the tibiofemoral joint and diagnosis of OA<br>Exclusions: aged <40 years, history of myocardial infarction, cerebral vascular accident or other neurological disorder, lower extremity joint arthroplasty, inability to walk without device | BMI – continuous                                                                                                                                              | 13                  | 63.5 (11.4)                                         | 10 (76.9)               | <b>Government</b> (National Institutes of Arthritis and Musculoskeletal and Skin Diseases)  |
| Yusuf (2011) [The Netherlands] <sup>302</sup> | Multiple sites | Pros. Cohort | Caucasian siblings (aged 40-70 years) with symptomatic OA in hands or other joints (KL grade $\geq 1$ ) in $\geq 1$ knee at baseline<br>Exclusions: secondary OA, familial syndromes with clear Mendelian inheritance, shortened life-expectancy (<1 year)                                                                         | BMI categories:<br>Normal: $\leq 25$<br>Overweight: 25-30<br>Obese: >30                                                                                       | 155                 | 59.6 (7.4)                                          | 132 (85.2)              | <b>Industry</b> (TI-Pharma, Pfizer), <b>Professional body</b> (Dutch Arthritis Association) |
| Shea (2010) [USA] <sup>303</sup>              | Knee           | Pros. Cohort | Reanalysis of RCT, Obese and older men and women with knee OA<br>Exclusions: cardiovascular disease, hypertension, chronic obstructive pulmonary disorder, other comorbidities that could limit mobility and participation in regular exercise                                                                                     | Patients divide into weight loss (WL) or no weight loss (NWL). Original treatment groups were:<br>1) Dietary weight loss<br>2) Exercise<br>3) Diet + exercise | WL: 159<br>NWL: 159 | WL: 68.2 (6.1)<br>NWL: 69.0 (6.3)"                  | WL: 72.3%<br>NWL: 71.2% | <b>University</b> (Wake Forest University)                                                  |
| Eckstein (2009) [USA] <sup>304</sup>          | Knee           | Pros. Cohort | Osteoarthritis Initiative, frequent knee symptoms, radiographic OA in at least their knees<br>Exclusions: rheumatoid or inflammatory arthritis, bilateral end-stage knee OA, inability to walk without aids and MRI contraindications                                                                                              | BMI categories:<br>1) BMI <25<br>2) BMI 25-30<br>3) BMI 30-35<br>4) BMI $\geq 35$                                                                             | 156                 | 60.9 (9.9)                                          | 79 (50.6)               | <b>Industry</b> (Pfizer)                                                                    |
| Le Graverand (2009) [USA] <sup>305</sup>      | Knee           | Pros. Cohort | Aged $\geq 40$ years, definite radiographic OA at baseline (KL grade II-III), BMI 30-55, Knee pain/aching/stiffness on most days during the past year and/or treatment for knee pain most days in past year                                                                                                                        | BMI – continuous                                                                                                                                              | 60                  | KL grade II: 55.5 (7.4)<br>KL grade III: 58.2 (8.3) | 60 (100)                | <b>Industry</b> (Pfizer)                                                                    |

BMI = body mass index, KL = Kellgren-Lawrence, N = number, OA = osteoarthritis, pros. = prospective, RCT = randomised controlled trial, SD = standard deviation, USA = United States of America

Table – Osteoarthritis, description of included studies

| Author (date) [country]                                 | OA site   | Study design | Inclusion criteria                                                                                                                                                                                                                                                                                                                                                                                                              | Exposure / intervention detail       | N                      | Age, mean (SD) years                                                            | N (%) female                                               | Funders                                                                                                                                          |
|---------------------------------------------------------|-----------|--------------|---------------------------------------------------------------------------------------------------------------------------------------------------------------------------------------------------------------------------------------------------------------------------------------------------------------------------------------------------------------------------------------------------------------------------------|--------------------------------------|------------------------|---------------------------------------------------------------------------------|------------------------------------------------------------|--------------------------------------------------------------------------------------------------------------------------------------------------|
| Botha-Scheepers (2008) [The Netherlands] <sup>306</sup> | Knee      | Pros. Cohort | Genetics, Arthrosis and Progression (GARP) study. OA at multiple sites in the hands or hand, spine, knee or hip, aged 40-70 years<br>Exclusions: secondary OA, familial syndromes with a Mendelian inheritance pattern or a shortened life expectancy                                                                                                                                                                           | BMI <30 vs BMI ≥30                   | 88                     | Median (IQR): 59.6 (55.3 - 66.6)                                                | 67 (76.1)                                                  | <b>Industry</b> (Pfizer)                                                                                                                         |
| Davies-Tuck (2008) [Australia] <sup>307</sup>           | Knee      | Pros. Cohort | Aged >40 years, fulfilling ACR clinical and radiographic criteria for OA, pain and osteophytes present<br>Exclusions: other forms of arthritis, contraindication to MRI, planned knee replacement                                                                                                                                                                                                                               | Weight and BMI                       | 117                    | 63.7 (10.2)                                                                     | 68 (58.1)                                                  | <b>Government</b> (National Health and Medical Research Council of Australia), <b>Professional body</b> (Royal Australian College of Physicians) |
| Pelletier (2007) [Canada] <sup>308</sup>                | Knee      | Pros. Cohort | Reanalysis of RCT – radiographic knee OA, minimum joint space width between 2-4mm<br>Exclusions: chondrocalcinosis or an acute or chronic infection or if there OA of the knee was secondary to other conditions. History of past or present gastrointestinal ulcerations, receipt of an intra-articular corticoid injection in knee within 6 months of study, KL grade IV, functional class IV                                 | BMI – continuous                     | 107                    | 62.4 (7.5)                                                                      | 64%                                                        | <b>Industry</b> (Procter and Gamble, ArthroVision)                                                                                               |
| Reijman (2007) [The Netherlands] <sup>309</sup>         | Hip, knee | Pros. Cohort | Rotterdam study – aged ≥55 years, radiographic OA at baseline (KL I-III)                                                                                                                                                                                                                                                                                                                                                        | BMI categories: ≤25, >25-27.5, >27.5 | Hip: 1676<br>Knee: 532 | Hip: 66.1 (6.9)<br>Knee: 68.6 (7.0)                                             | Hip: 52.1%<br>Knee: 68.4%                                  | <b>Not reported</b> – Authors declared no conflict of interest                                                                                   |
| Raynauld (2006) [Canada] <sup>310</sup>                 | Knee      | Pros. Cohort | Reanalysis of RCT – aged 40-80 years, ACR knee OA criteria, radiographic evidence of OA, joint space width 2-4mm<br>Exclusions: chondrocalcinosis or an acute or chronic infection or if there OA of the knee was secondary to other conditions. History of past or present gastrointestinal ulcerations, receipt of an intra-articular corticoid injection in knee within 6 months of study, KL grade IV, functional class IV: | BMI – continuous                     | 107                    | Slow cartilage loss: 60.9 (7.5)<br>Intermediate: 63.0 (7.7)<br>Fast: 66.0 (5.0) | Slow cartilage loss: 68%<br>Intermediate: 64%<br>Fast: 45% | <b>Industry</b> (Procter and Gamble)                                                                                                             |

ACR = American College of Rheumatology, BMI = body mass index, KL = Kellgren-Lawrence, N = number, OA = osteoarthritis, pros. = prospective, RCT = randomised controlled trial, SD = standard deviation, USA = United States of America

Table – Osteoarthritis, description of included studies

| Author (date) [country]                     | OA site   | Study design | Inclusion criteria                                                                                                                                                                                                                                                                          | Exposure / intervention detail                                   | N    | Age, mean (SD) years                                                                    | N (%) female                                                | Funders                                                                                                                           |
|---------------------------------------------|-----------|--------------|---------------------------------------------------------------------------------------------------------------------------------------------------------------------------------------------------------------------------------------------------------------------------------------------|------------------------------------------------------------------|------|-----------------------------------------------------------------------------------------|-------------------------------------------------------------|-----------------------------------------------------------------------------------------------------------------------------------|
| Wluka (2006) [Australia] <sup>311</sup>     | Knee      | Pros. Cohort | Aged >40 years, mild symptomatic knee OA (i.e. $\geq 1$ pain dimension on WOMAC above 20% and osteophytes)<br>Exclusions: other forms of arthritis, contraindication to MRI, inability to walk 50 feet without assistive device, hemiparesis of either lower limb, planned knee replacement | BMI – continuous                                                 | 105  | 63.8 (10.6)                                                                             | 59 (56.2)                                                   | <b>Government</b> (National Health and Medical Research Council of Australia)                                                     |
| Sharma (2003) [USA] <sup>312</sup>          | Knee      | Pros. Cohort | Presence of definite tibiofemoral osteophytes (KL II) confirmed by radiograph, rating of at least “a little difficulty” on $\geq 2$ WOMAC function scales                                                                                                                                   | BMI – 5 unit increases                                           | 236  | 68.6 (10.8)                                                                             | 172 (72.9)                                                  | <b>Government</b> (National Institute of Arthritis and Musculoskeletal and Skin Diseases, National Center for Research Resources) |
| Cicuttini (2002) [Australia] <sup>313</sup> | Knee      | Pros. Cohort | Aged $\geq 40$ years, ARA criteria for knee OA, radiographic evidence of osteophytes / joint space narrowing<br>Exclusions: Any other form of arthritis, contraindications to MRI, total knee replacement planned                                                                           | BMI – continuous                                                 | 110  | 63.2 (10.2)                                                                             | 66 (60.0)                                                   | <b>Government</b> (National Health and Medical Research Council)                                                                  |
| Wolfe (2002) [USA] <sup>314</sup>           | Knee, hip | Pros. Cohort | Knee or hip OA based on clinical criteria (ACR)                                                                                                                                                                                                                                             | BMI tertiles                                                     | 1507 | 63.4 (11.8)                                                                             | 77%                                                         | <b>Industry</b> (Roche), <b>Charity</b> (Rosaline Russell Research Fund)                                                          |
| Detora (2001) [27 countries] <sup>315</sup> | Knee, hip | Pros. Cohort | Patients taking part in a 3 trials of rofecoxib                                                                                                                                                                                                                                             | BMI tertiles                                                     | 1501 | mean (range)<br>Study 1: 61.9 (38-92)<br>Study 2: 61.0 (39-91)<br>Study 3: 63.4 (40-86) | Study 1: 306 (72)<br>Study 2: 385 (75)<br>Study 3: 452 (81) | <b>Industry</b> (Merck)                                                                                                           |
| Cooper (2000) [UK] <sup>316</sup>           | Knee      | Pros. Cohort | Aged $\geq 55$ years, KL grade II-III                                                                                                                                                                                                                                                       | BMI categories:<br>Low (<22.7), Middle (22.7-25.4), High (>25.4) | 354  | 70.2                                                                                    | 72%                                                         | <b>Charity</b> (Arthritis Research Campaign)                                                                                      |
| Harris (1994) [UK] <sup>317</sup>           | Hand      | Pros. Cohort | Hand or knee OA                                                                                                                                                                                                                                                                             | BMI – continuous                                                 | 169  | 60                                                                                      | 122 (72.2)                                                  | <b>Not reported</b>                                                                                                               |

ACR = American College of Rheumatology, ARA = American Rheumatism Association, BMI = body mass index, KL = Kellgren-Lawrence, MRI = magnetic resonance imaging, N = number, OA = osteoarthritis, pros. = prospective, SD = standard deviation, USA = United States of America, WOMAC = Western Ontario and McMaster Universities Osteoarthritis Index

Table – Osteoarthritis, description of included studies

| Author (date) [country]                          | OA site | Study design  | Inclusion criteria                                                                                                                                                                                                                                           | Exposure / intervention detail                            | N   | Age, mean (SD) years                                  | N (%) female                                      | Funders                                                                                                     |
|--------------------------------------------------|---------|---------------|--------------------------------------------------------------------------------------------------------------------------------------------------------------------------------------------------------------------------------------------------------------|-----------------------------------------------------------|-----|-------------------------------------------------------|---------------------------------------------------|-------------------------------------------------------------------------------------------------------------|
| Ledingham (1993) [UK] <sup>318</sup>             | Hip     | Pros. Cohort  | Presence of radiographic change together with pain or clinical abnormalities.                                                                                                                                                                                | BMI                                                       | 136 | median (range): 65 (29-85)                            | 85 (62.5)                                         | <b>Government</b> (Trent Regional Health Authority)                                                         |
| Schouten (1992) [The Netherlands] <sup>319</sup> | Knee    | Pros. Cohort  | Doctor diagnosed local OA, KL grade $\geq$ II                                                                                                                                                                                                                | BMI – quartiles: <24.35, 24.35-25.96, 25.97-27.73, >27.73 | 142 | 57.2 (6.1)                                            | 84 (59.2)                                         | <b>Government</b> (Dutch Ministry of Science and Education, Ministry of Welfare, Public Health and Culture) |
| Berkhout (1985) [The Netherlands] <sup>320</sup> | Knee    | Pros. Cohort  | Radiographs compatible with the clinical diagnosis of RA, localised or generalised OA<br>Exclusions: No patient with a history of knee trauma,                                                                                                               | Categorised as obese or not obese                         | 72  | 63.5                                                  | 54 (75)                                           | <b>Not reported</b>                                                                                         |
| Ahn (2016) [South Korea] <sup>321</sup>          | Knee    | Retro. Cohort | Had meniscus allograft transplantation, 6 months of knee pain despite treatment and surgery<br>Exclusions: Lack of post-operative MRI, loss to follow-up for a minimum of 3 years, simultaneous surgery on articular cartilage of anterior cruciate ligament | BMI – continuous                                          | 69  | No progression: 37.9 (8.9)<br>Progression: 35.4 (8.1) | No progression: 10 (26.3%)<br>Progress: 7 (22.6%) | <b>Not reported</b> – Authors declared no conflict of interest                                              |

BMI = body mass index, KL = Kellgren-Lawrence, MRI = magnetic resonance imaging, N = number, OA = osteoarthritis, pros. = prospective, Retro. = retrospective, SD = standard deviation, UK = United Kingdom



## Supplementary table 91 – Pain outcomes from weight-loss interventions in OA

Table – Pain (OA), results and quality assessment

| Study (date) [study type]             | Standardised result, SMD (95% CI) unless otherwise stated                                                                                                                                                                                                                             | Natural result                                                                                                                                                                                         | Supports intervention | AMSTAR2 quality  | Rand. Seq. | Alloc. Conc. | Blind. Part. | Blind. Asses. |
|---------------------------------------|---------------------------------------------------------------------------------------------------------------------------------------------------------------------------------------------------------------------------------------------------------------------------------------|--------------------------------------------------------------------------------------------------------------------------------------------------------------------------------------------------------|-----------------------|------------------|------------|--------------|--------------|---------------|
| Corbett (2013) [MA] <sup>15</sup>     | <u>Trials of better quality</u><br>SMD -0.08 (-0.55, 0.39) vs standard care<br><u>Trials of any quality</u><br>SMD -0.26 (-0.67, 0.15) vs standard care                                                                                                                               |                                                                                                                                                                                                        | ✘                     | Moderate         |            |              |              |               |
| Le Quintrec (2014) [SR] <sup>24</sup> |                                                                                                                                                                                                                                                                                       | Only patients in the diet + exercise groups have improvements in pain                                                                                                                                  | ✓                     | Critically low   |            |              |              |               |
| Fernandes (2013) [SR] <sup>36</sup>   |                                                                                                                                                                                                                                                                                       | Weight loss combined with exercise improves pain and function. EULAR recommends weight loss for patients with OA                                                                                       | ✓                     | Critically low § |            |              |              |               |
| Sadeghi (2019) [RCT] <sup>251</sup>   | <u>Diet intervention vs control at 3 months</u><br>SMD -0.17 (-0.67, 0.33)                                                                                                                                                                                                            | <u>WOMAC pain, BL / 3 months, mean (SD)</u><br>Diet intervention: 248 (90) / 213.50 (96.6)<br>Control: 234 (115) / 232.01 (117)                                                                        | ✘                     |                  | H/UC       | H/UC         | H/UC         | H/UC          |
| O'Brien (2018) [RCT] <sup>252</sup>   | <u>Telephone intervention vs control at week 26</u><br>SMD 0.00 (-0.36, 0.36)                                                                                                                                                                                                         | <u>WOMAC pain, BL / week 26, mean (SD)</u><br>Telephone weight loss: 9.0 (3.8) / 9.5 (3.5)<br>Control: 9.8 (4.1) / 9.5 (4.1)                                                                           | ✘                     |                  | L          | L            | H/UC         | L             |
| Allen (2017) [RCT] <sup>253</sup>     | <u>Patient intervention vs control, change BL-12 months</u><br>SMD -0.13 (-0.37, 0.12)<br><u>Provider intervention vs control, change BL-12 months</u><br>SMD 0.05 (-0.19, 0.29)<br><u>Patient + provider intervention vs control, change BL-12 months</u><br>SMD -0.10 (-0.34, 0.14) | <u>WOMAC pain, change BL-12 months, mean (SD ‡)</u><br>Patient intervention: -1.5 (4.0)<br>Provider intervention: -0.8 (3.9)<br>Patient + provider interventions: -1.4 (4.2)<br>Usual care: -1.0 (3.8) | ✘                     |                  | L          | L            | H/UC         | L             |
| Allen (2016) [RCT] <sup>254</sup>     |                                                                                                                                                                                                                                                                                       | <u>WOMAC pain, difference between intervention and control at 12 months (95% CI)</u><br>-0.5 (-1.2, 0.2)                                                                                               | ✘                     |                  | L          | H/UC         | H/UC         | L             |

‡ SD calculated from 95% CI

§ Fernandes (2013) is a recommendations paper and so there is little information on the systematic review that was conducted to support the recommendations

Alloc. Conc. = allocation concealment, AMSTAR2 = Assessing the Methodological Quality of Systematic Reviews, BL = baseline, Blind. Asses. = Blinded assessors, Blind. Part. = blinded participants, CI = confidence interval, H/UC = high / unclear risk of bias, L = low risk of bias, MA = meta-analysis, OA = osteoarthritis, Rand. Seq. = random sequence generation, SMD = Standardised mean difference, SR = systematic review, WOMAC = Western Ontario and McMaster Universities Osteoarthritis Index

Table – Pain (OA), results and quality assessment

| Study (date) [study type]               | Standardised result, SMD (95% CI) unless otherwise stated                                                                                                                                                                        | Natural result                                                                                                                                                                                                                                                                  | Supports intervention | AMSTAR2 quality | Rand. Seq. | Alloc. Conc. | Blind. Part. | Blind. Asses. |
|-----------------------------------------|----------------------------------------------------------------------------------------------------------------------------------------------------------------------------------------------------------------------------------|---------------------------------------------------------------------------------------------------------------------------------------------------------------------------------------------------------------------------------------------------------------------------------|-----------------------|-----------------|------------|--------------|--------------|---------------|
| Christensen (2015) [RCT] <sup>255</sup> | <u>Diet vs control, change BL-68 weeks</u><br>SMD -0.03 (-0.38, 0.32)<br><u>Exercise vs control, change BL-68 weeks</u><br>SMD -0.01 (-0.35, 0.34)                                                                               | <u>Pain VAS, change BL-68 weeks, mean (SD ‡)</u><br>Diet: -6.1 (20.4)<br>Exercise: -5.6 (20.2)<br>Control: -5.5 (20.4)                                                                                                                                                          | ✘                     |                 | L          | L            | H/UC         | L             |
| Saraboon (2015) [RCT] <sup>257</sup>    | <u>Health education vs control</u><br>Both knees: SMD -2.77 (-3.38, -2.15)<br>Left knee: SMD -1.11 (-1.58, -0.64)<br>Right knee: SMD -1.71 (-2.22, -1.19)                                                                        | <u>Knee pain at 6 weeks, mean (SD)</u><br><i>Both knees</i><br>Health education: 1.84 (1.61)<br>Control: 6.32 (1.63)<br><i>Left knee</i><br>Health education: 2.50 (2.17)<br>Control: 5.29 (2.81)<br><i>Right knee</i><br>Health education: 2.86 (2.11)<br>Control: 5.63 (0.91) | ✓                     |                 | H/UC       | H/UC         | H/UC         | H/UC          |
| Messier (2013) [RCT] <sup>26</sup>      | <u>Diet + exercise vs diet at 18 months</u><br>SMD -0.31 (-0.54, -0.09)<br><u>Diet + exercise vs exercise at 18 months</u><br>SMD -0.21 (-0.44, 0.02)                                                                            | <u>WOMAC pain, BL / 18 months, mean (SD ‡)</u><br>Diet 6.6 (3.1) / 4.8 (3.5)<br>Exercise: 6.1 (3.1) / 4.4 (3.1)<br>Diet + exercise: 6.7 (3.5) / 3.7 (3.5)                                                                                                                       | ✓                     |                 | L          | H/UC         | H/UC         | L             |
| Somers (2012) [RCT] <sup>260</sup>      | <u>Pain coping vs control at week 24</u><br>SMD -0.24 (-0.62, 0.13)<br><u>Weight loss vs control at week 24</u><br>SMD -0.18 (-0.56, 0.20)<br><u>Pain coping + weight loss vs control at week 24</u><br>SMD -0.80 (-1.18, -0.41) | <u>WOMAC pain, BL / 24 weeks, mean (SD ‡)</u><br>Pain coping: 42.8 (22.1) / 34.5 (14.6)<br>Weight loss: 42.6 (19.2) / 35.5 (13.9)<br>Pain coping + weight loss: 47.7 (22.5) / 27.2 (13.1)<br>Control: 43.4 (22.0) / 38.0 (14.0)                                                 | ✓                     |                 | L          | L            | H/UC         | L             |
| Bliddal (2011) [RCT] <sup>261</sup>     | <u>Very low calories vs low calories, change BL-52 weeks</u><br>SMD -0.49 (-0.91, -0.07)                                                                                                                                         | <u>WOMAC pain, change BL-52 weeks, mean (SD ‡)</u><br>Very low calories: -7.7 (14.6)<br>Low calories: -0.5 (14.8)                                                                                                                                                               | ✓                     |                 | L          | L            | H/UC         | L             |
| Riecke (2010) [RCT] <sup>264</sup>      | <u>Low vs very low calories, change BL-16 weeks</u><br>SMD 0.06 (-0.22, 0.34)                                                                                                                                                    | <u>WOMAC Pain, change BL-16 week, mean (SD ‡)</u><br>Low calorie: -10.5 (17.9) ;<br>Very low calorie: -11.6 (18.6) p=0.68                                                                                                                                                       | ✘                     |                 | L          | L            | H/UC         | L             |

† SD calculated from standard error

‡ SD calculated from 95% CI

Alloc. Conc. = allocation concealment, AMSTAR2 = Assessing the Methodological Quality of Systematic Reviews, BL = baseline, Blind. Asses. = Blinded assessors, Blind. Part. = blinded participants, CI = confidence interval, H/UC = high / unclear risk of bias, L = low risk of bias, OA = osteoarthritis, Rand. Seq. = random sequence generation, RR = risk ratio, SMD = Standardised mean difference, VAS = visual analogue scale, WOMAC = Western Ontario and McMaster Universities Osteoarthritis Index

Table – Pain (OA), results and quality assessment

| Study (date) [study type]                                                     | Standardised result, SMD (95% CI) unless otherwise stated                                                                                                                                                                               | Natural result                                                                                                                                                                                                       | Supports intervention | AMSTAR2 quality | Rand. Seq. | Alloc. Conc. | Blind. Part. | Blind. Asses. |
|-------------------------------------------------------------------------------|-----------------------------------------------------------------------------------------------------------------------------------------------------------------------------------------------------------------------------------------|----------------------------------------------------------------------------------------------------------------------------------------------------------------------------------------------------------------------|-----------------------|-----------------|------------|--------------|--------------|---------------|
| Ravaud (2009) [RCT] <sup>265</sup>                                            | <u>Weight-loss session vs control, change BL-4 months</u><br>SMD -0.19 (-0.41, 0.03)<br><u>Weight-loss session vs control, change BL-12 months</u><br>SMD -0.19 (-0.41, 0.03)<br>[significant after using propensity score adjustments] | <u>Pain VAS, change bl-4 months / bl-12 mth, mean (SD)</u><br>Weight-loss sessions: -1.65 (2.32) / -1.35 (2.48)<br>Control: -1.18 (2.58) / -0.86 (2.59)                                                              | ✓                     |                 | L          | L            | H/UC         | H/UC          |
| Miller (2006) [RCT] <sup>267</sup>                                            | <u>Weight loss vs control at 6 months</u><br>SMD -0.66 (-1.10, -0.23)                                                                                                                                                                   | <u>WOMAC pain, BL / 6 months, mean (SD †)</u><br>Weight loss: 6.5 (3.3) / 4.1 (2.7)<br>Control: 6.3 (3.3) / 6.1 (3.3)                                                                                                | ✓                     |                 | H/UC       | H/UC         | H/UC         | H/UC          |
| Christensen (2005) [RCT] <sup>262</sup>                                       | <u>Very low calories vs low calories, change BL-8 weeks</u><br>SMD -0.16 (-0.60, 0.28)                                                                                                                                                  | <u>WOMAC pain, change BL-8 weeks, mean (SD †)</u><br>Very low calories: -57.0 (106.9)<br>Low calories: -29.8 (111.9)                                                                                                 | ✗                     |                 | L          | H/UC         | H/UC         | H/UC          |
| Messier (2004) [RCT] <sup>25</sup>                                            | <u>Diet vs control at 18 months</u><br>SMD -0.13 (-0.44, 0.18)<br><u>Exercise vs control at 18 months</u><br>SMD 0.05 (-0.26, 0.37)<br><u>Exercise + diet vs control at 18 months</u><br>SMD -0.24 (-0.55, 0.08)                        | <u>WOMAC pain, bl / 18 months, mean (SD †)</u><br>Diet: 6.58 (3.6) / 5.51 (4.1)<br>Exercise: 6.64 (3.5) / 6.24 (4.2)<br>Exercise + diet: 7.27 (3.6) / 5.07 (4.1)<br>Control: 7.25 (3.4) / 6.02 (4.0)                 | ✗                     |                 | L          | L            | H/UC         | L             |
| Rejeski (2002) [RCT] <sup>268</sup>                                           | <u>Diet vs control at 18 months</u><br>SMD 0.32 (-0.01, 0.66)<br><u>Exercise vs control at 18 months</u><br>SMD 0.25 (-0.09, 0.59)<br><u>Diet + exercise vs control at 18 months</u><br>SMD 0.61 (0.26, 0.95)                           | <u>SF-36 pain, BL / 18 months, mean (SD †)</u><br>Diet: 49.38 (19.0) / 56.71 (21.1)<br>Exercise: 51.30 (19.5) / 55.03 (19.4)<br>Diet + exercise: 50.25 (19.9) / 62.41 (20.6)<br>Control: 45.49 (18.2) / 50.09 (19.9) | ✓                     |                 | H/UC       | H/UC         | H/UC         | L             |
| Bespoke meta-analysis including <sup>25;251-253;255;257;260;265;267;268</sup> | <u>Weight loss interventions vs control</u><br>SMD -0.31 (-0.49, -0.13), I <sup>2</sup> 82.6%<br>Excluding 1 outlier <sup>257</sup> : SMD -0.20 (-0.30, -0.09), I <sup>2</sup> 48.2%                                                    |                                                                                                                                                                                                                      | ✓                     |                 |            |              |              |               |

† SD calculated from standard error

Alloc. Conc. = allocation concealment, AMSTAR2 = Assessing the Methodological Quality of Systematic Reviews, BL = baseline, Blind. Asses. = Blinded assessors, Blind. Part. = blinded participants, CI = confidence interval, H/UC = high / unclear risk of bias, L = low risk of bias, OA = osteoarthritis, Rand. Seq. = random sequence generation, SMD = Standardised mean difference, VAS = visual analogue scale, WOMAC = Western Ontario and McMaster Universities Osteoarthritis Index

Table – Pain (OA), results and quality assessment

| Study (date) [study type]                           | Standardised result, SMD (95% CI) unless otherwise stated | Natural result                                                                                                                                                                                                                                                                                                                                         | Supports intervention | AMSTAR2 quality | Rand. Seq. | Alloc. Conc. | Blind. Part. | Blind. Asses. |
|-----------------------------------------------------|-----------------------------------------------------------|--------------------------------------------------------------------------------------------------------------------------------------------------------------------------------------------------------------------------------------------------------------------------------------------------------------------------------------------------------|-----------------------|-----------------|------------|--------------|--------------|---------------|
| Huang (2000) [NRT] <sup>271</sup>                   |                                                           | <u>Pain VAS, BL / 12 weeks, mean (SD †)</u><br>Diet therapy-II 4.4 (1.3) / 2.6 (0.6)<br>Diet therapy-III 6.9 (1.2) / 4.7 (1.2)<br>Diet therapy -IV 8.5 (2.1) / 4.7 (0.7)<br>Electrotherapy-II 4.5 (1.0) / 3.0 (0.6)<br>Electrotherapy-III 6.7 (1.2) / 5.0 (1.6)<br>Electrotherapy-IV 8.3 (1.8) / 5.6 (1.9)<br>[numerals after dash indicated KL grade] | ✓                     |                 |            |              |              |               |
| Bartholdy (2019) [Single arm int.] <sup>272</sup>   |                                                           | <u>KOOS pain, change bl-8 weeks, mean (95% CI)</u><br>Unadjusted: 12.8 (10.6, 15.0)<br>Adjusted: 13.0 (10.8, 15.3)                                                                                                                                                                                                                                     | ✓                     |                 |            |              |              |               |
| Aree-Ue (2017) [Single arm int.] <sup>273</sup>     |                                                           | <u>Pain VAS, Change BL – 12 months, mean (SE)</u><br>left knee = 4.80 (0.53)<br>right knee = 5.52 (0.61)                                                                                                                                                                                                                                               | ✓                     |                 |            |              |              |               |
| Atukorala (2016) [Single arm int.] <sup>274</sup>   |                                                           | <u>KOOS pain, mean change BL - 18 weeks (SD)</u><br>≤2.5% weight loss: 6.1 (13.0)<br>2.5-5% weight loss: 9.9 (16.8)<br>5-7.5% weight loss: 12.0 (17.1)<br>7.5-10% weight loss: 13.3 (15.1)<br>≥10% weight loss: 16.7 (16.1)                                                                                                                            | ✓                     |                 |            |              |              |               |
| Bartels (2014) [Single arm int.] <sup>275</sup>     |                                                           | <u>KOOS pain, mean change BL – 16 weeks</u><br>Unadjusted: 10.7 (SD = 14.5)<br>Adjusted: 10.0 (95% CI 7.3, 12.7)                                                                                                                                                                                                                                       | ✓                     |                 |            |              |              |               |
| Paans (2013) [Single arm int.] <sup>276</sup>       |                                                           | <u>VAS Pain, BL / 8 months, mean (SE)</u><br>[recoded VAS so that 10 = best outcome]<br>3.7 (0.3) / 6.8 (0.4)                                                                                                                                                                                                                                          | ✓                     |                 |            |              |              |               |
| Gudbergesen (2012) [Single arm int.] <sup>277</sup> |                                                           | <u>KOOS pain, median percentage improvement over 16 weeks</u><br>14%                                                                                                                                                                                                                                                                                   | ✓                     |                 |            |              |              |               |

† SD calculated from standard error

Alloc. Conc. = allocation concealment, AMSTAR2 = Assessing the Methodological Quality of Systematic Reviews, BL = baseline, Blind. Asses. = Blinded assessors, Blind. Part. = blinded participants, CI = confidence interval, H/UC = high / unclear risk of bias, KOOS = knee injury and osteoarthritis outcome score, OA = osteoarthritis, Rand. Seq. = random sequence generation, SD = standard deviation, SE = standard error, VAS = visual analogue scale

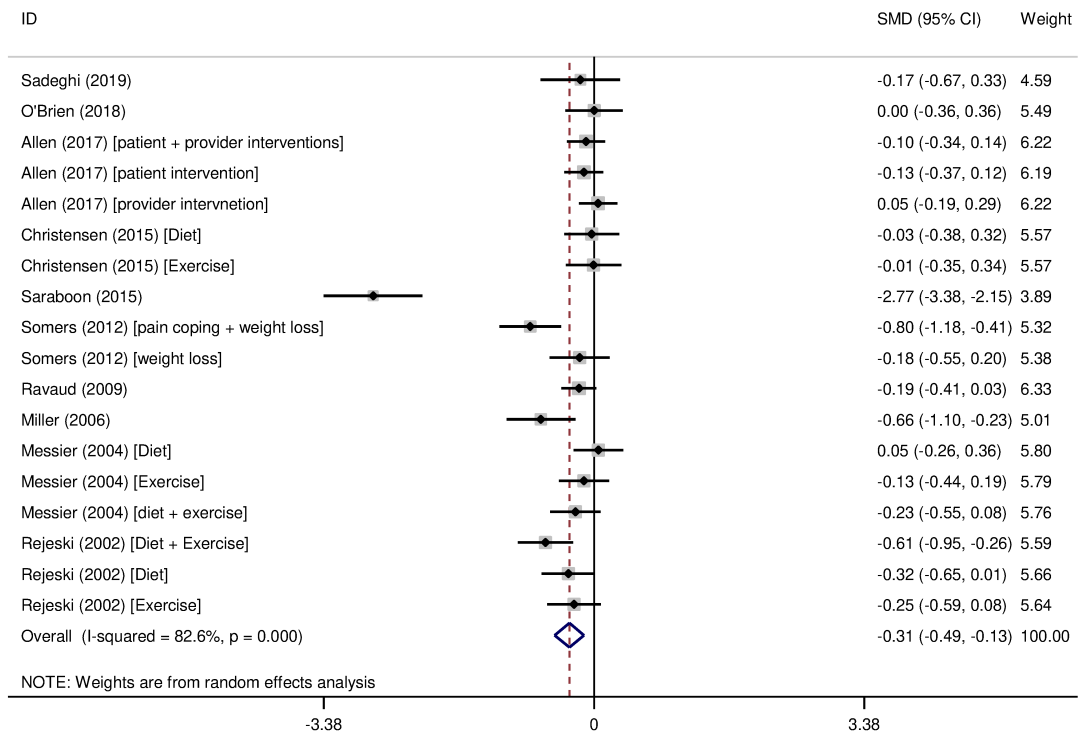

Figure – Weight loss interventions vs control - outcome = pain

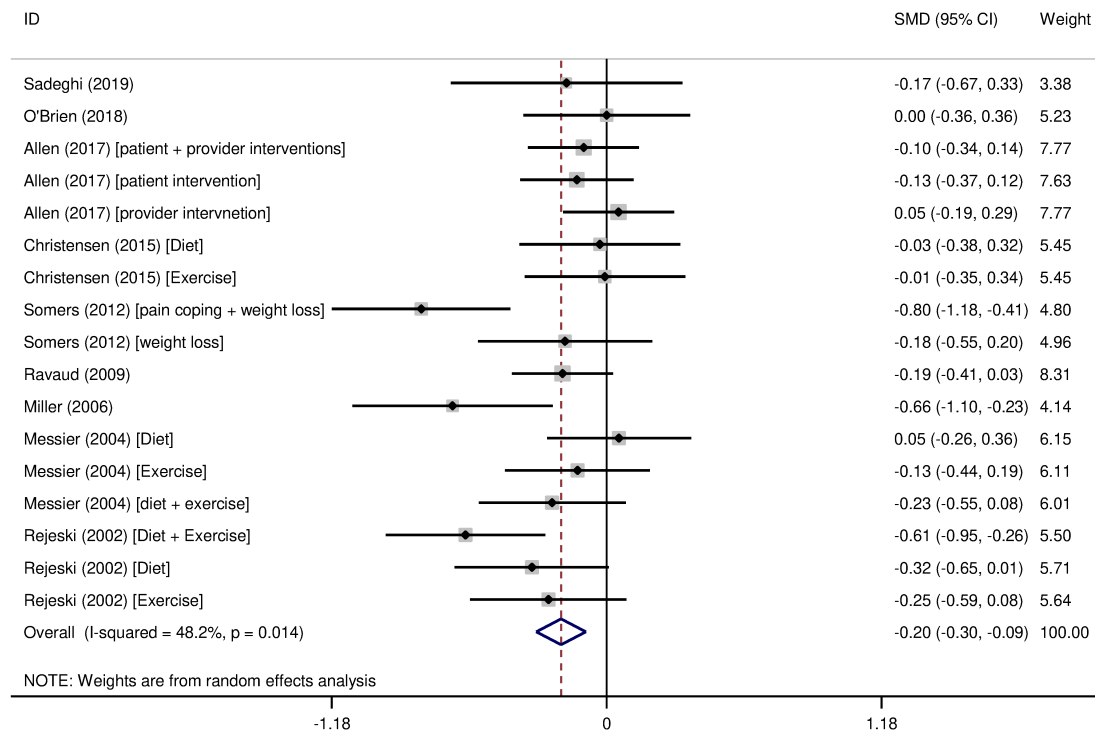

Figure – Weight loss interventions vs control - outcome = pain [excluding 1 outlier – Saraboon et al]

## Supplementary table 92 – Pain outcomes from observational studies in OA

Table – Pain (OA), results and quality assessment of observational studies

| Study (date) [study type]                             | Results                                                                                                                                                                                                                                                                                                                                                               | Weight associated with outcome | AMSTAR2  | Study Pop. | Attr. | Prog. Meas. | Outc. Meas. | Conf. | Stats. |
|-------------------------------------------------------|-----------------------------------------------------------------------------------------------------------------------------------------------------------------------------------------------------------------------------------------------------------------------------------------------------------------------------------------------------------------------|--------------------------------|----------|------------|-------|-------------|-------------|-------|--------|
| Pozzobon (2018) [MA] <sup>18</sup>                    | <u>Pain after arthroplasty, non-obese vs obese</u><br>Short-term: SMD -0.44 (-0.68, -0.20)<br>Long-term: SMD -0.36 (-0.47, -0.25)                                                                                                                                                                                                                                     | ✓                              | Low      |            |       |             |             |       |        |
| de Rooij (2016) [SR] <sup>38</sup>                    | One study reported no association between BMI and pain                                                                                                                                                                                                                                                                                                                | ✗                              | Moderate |            |       |             |             |       |        |
| de Rooij (2016) [SR] <sup>22</sup>                    | Four out of six studies reported that BMI predicts pain                                                                                                                                                                                                                                                                                                               | ✓                              | Moderate |            |       |             |             |       |        |
| Bihlet (2018) [Prospective cohort] <sup>278</sup>     | Baseline BMI was not associated with change in pain                                                                                                                                                                                                                                                                                                                   | ✗                              |          | L          | M     | L           | L           | H     | H      |
| Jacobs (2018) [Prospective cohort] <sup>280</sup>     | <u>WOMAC pain, BL / 2 years, mean (SD)</u><br>Obese: 2.4 (3.0) / 2.9 (3.2)<br>Obese + depression: 5.5 (4.6) / 7.1 (4.6)<br>Neither: 2.1 (2.9) / 2.7 (3.3)                                                                                                                                                                                                             | ✗                              |          | L          | L     | L           | L           | L     | M      |
| Bastick (2016) [Prospective cohort] <sup>284</sup>    | <u>Pain trajectories, mean (SD) BL BMI</u><br>Mild pain: 25 (4)<br>Moderate decrease: 26 (4)<br>Moderate progression: 27 (5)<br>Severe pain: 27 (5)<br><u>Pain trajectory, univariable RR (95%CI) per unit increase in BMI</u><br>Mild pain: ref<br>Moderate decrease: 1.07 (1.00, 1.14)<br>Moderate progression: 1.10 (1.04, 1.16)<br>Severe pain: 1.12 (1.05, 1.19) | ✓                              |          | L          | M     | L           | L           | M     | M      |
| de Rezende (2016) [Prospective cohort] <sup>285</sup> | <u>Correlation change BMI and change WOMAC Pain over one year</u><br>r=0.199, p=0.006<br><u>Correlation between change in BMI and WOMAC pain at 1 year</u><br>r=-0.193, p=0.007                                                                                                                                                                                       | ✓                              |          | L          | L     | L           | L           | H     | M      |
| Kobayashi (2015) [Prospective cohort] <sup>289</sup>  | <u>Pain progression, OR (95%CI)</u><br>BMI: 1.01 (0.88, 1.16) [unadj] / 0.10 (0.81, 1.22) [adj] [sic]                                                                                                                                                                                                                                                                 | ✗                              |          | M          | L     | L           | L           | L     | M      |
| Magnusson (2015) [Prospective cohort] <sup>290</sup>  | <u>AUSCAN pain, over follow-up, regression coefficient (95% CI)</u><br>BMI longitudinal: -0.02 (-0.37, 0.33) [adjusted]                                                                                                                                                                                                                                               | ✗                              |          | L          | M     | L           | L           | L     | M      |

Attr. = attrition, AUSCAN = Australian Canadian Osteoarthritis Hand Index, BL = baseline, BMI = body mass index, CI = confidence interval, Conf. = confounding, L = low risk of bias, M = moderate risk of bias, MA = meta-analysis, Outc. Meas = outcome measurement, Prog. Meas. = prognostic factor measurement, Pros = prospective, Rand. Seq. = random sequence generation, SD = standard deviation, SMD = Standardised mean difference, SR = systematic review, Stats. = statistical analysis, Study Pop. = study population, WOMAC = Western Ontario and McMaster Universities Osteoarthritis Index

Table – Pain (OA), results and quality assessment of observational studies

| Study (date) [study type]                              | Results                                                                                                                                                                                                        | Weight associated with outcome | Study Pop. | Attr. | Prog. Meas. | Outc. Meas. | Conf. | Stats. |
|--------------------------------------------------------|----------------------------------------------------------------------------------------------------------------------------------------------------------------------------------------------------------------|--------------------------------|------------|-------|-------------|-------------|-------|--------|
| Perrot (2013)<br>[Prospective cohort] <sup>292</sup>   | <u>lack of PASS pain, OR (95% CI) [adj]</u><br><u>hip</u><br><18.5: OR 1.89 (0.11, 33.33)<br>18.5-25: ref<br>25-30: 0.91 (0.62, 1.35)<br>≥30: 1.64 (1.02, 2.63)<br><u>knee</u><br>BMI not assessed for knee OA | ✓                              | L          | M     | L           | L           | M     | M      |
| Coffman (2012)<br>[Prospective cohort] <sup>293</sup>  | <u>Pain, regression coefficient (SE) [adjusted]</u><br>Overweight vs normal: 10.36 (4.16) p=0.01<br>Obese vs normal: 17.04 (4.25) p<0.0001                                                                     | ✓                              | L          | M     | L           | L           | L     | M      |
| Rabago (2012)<br>[Prospective cohort] <sup>295</sup>   | <u>Repeated measurement model:</u><br>BMI ≤25 kg/m <sup>2</sup> (p=0.04) associated with improvement in WOMAC score over 1 yr. (no effect size)                                                                | ✓                              | M          | L     | H           | L           | L     | M      |
| Sands (2012)<br>[Prospective cohort] <sup>296</sup>    | <u>WOMAC pain, change BL-22 weeks, mean (SE) [unadjusted]</u><br>Celecoxib daily: BMI<30: 0.32 (0.23); BMI≥30: 0.40 (0.21)<br>Celecoxib flare: BMI<30: 1.05 (0.23); BMI≥30: 1.31 (0.21)                        | ✗                              | L          | L     | M           | L           | H     | M      |
| Richette (2011)<br>[Prospective cohort] <sup>300</sup> | <u>Pain VAS, BL / after surgery, mean (SD)</u><br>50 (26.6) / 24.5 (21) p<0.0001<br><u>WOMAC pain, BL / after surgery, mean (SD)</u><br>187.3 (124.4) / 94.1 (93.9) p<0.0001                                   | ✓                              | L          | M     | L           | L           | M     | M      |

Attr. = attrition, BL = baseline, BMI = body mass index, CI = confidence interval, Conf. = confounding, L = low risk of bias, M = moderate risk of bias, OR = odds ratio, Outc. Meas = outcome measurement, PASS = patient acceptable symptom state, Prog. Meas. = prognostic factor measurement, Pros = prospective, Rand. Seq. = random sequence generation, SD = standard deviation, SE = standard error, Stats. = statistical analysis, Study Pop. = study population, VAS = visual analogue scale, WOMAC = Western Ontario and McMaster Universities Osteoarthritis Index



## Supplementary table 93 – Function outcomes from weight-loss interventions in OA

Table – Function (OA), results and quality assessment

| Study (date) [study type]               | Standardised result, SMD (95% CI) unless otherwise stated                                                                                                                                                                                                                             | Natural result                                                                                                                                                                                           | Supports intervention | AMSTAR2 quality | Rand. Seq. | Alloc. Conc. | Blind. Part. | Blind. Asses. |
|-----------------------------------------|---------------------------------------------------------------------------------------------------------------------------------------------------------------------------------------------------------------------------------------------------------------------------------------|----------------------------------------------------------------------------------------------------------------------------------------------------------------------------------------------------------|-----------------------|-----------------|------------|--------------|--------------|---------------|
| Le Quintrec (2014) [SR] <sup>24</sup>   |                                                                                                                                                                                                                                                                                       | Only patients in the diet + exercise groups have improvements in function                                                                                                                                | ✓                     | Critically low  |            |              |              |               |
| Sadeghi (2019) [RCT] <sup>251</sup>     | <u>Diet intervention vs control at 3 months</u><br>SMD -0.06 (-0.56, 0.44)                                                                                                                                                                                                            | WOMAC Function, BL / 3 months, mean (SD)<br>Diet intervention: 752 (351) / 631.94 (361.2)<br>Control: 638 (402) / 655.35 (409.26)                                                                        | ✗                     |                 | H/UC       | H/UC         | H/UC         | H/UC          |
| O'Brien (2018) [RCT] <sup>252</sup>     | <u>Telephone intervention vs control at week 26</u><br>SMD 0.26 (-0.10, 0.62)                                                                                                                                                                                                         | WOMAC function, BL / week 26 mean (SD)<br>Telephone weight loss: 34.9 (12.6) / 36.5 (13.2)<br>Control: 34.5 (12.2) / 32.8 (15.1)                                                                         | ✗                     |                 | L          | L            | H/UC         | L             |
| Allen (2017) [RCT] <sup>253</sup>       | <u>Patient intervention vs control, change BL-12 months</u><br>SMD -0.10 (-0.34, 0.15)<br><u>Provider intervention vs control, change BL-12 months</u><br>SMD 0.23 (-0.02, 0.47)<br><u>Patient + provider intervention vs control, change BL-12 months</u><br>SMD -0.02 (-0.26, 0.22) | WOMAC Function, change from BL to 12 months (SD ‡)<br>Patient intervention: -5.6 (10.7)<br>Provider intervention: -2.3 (10.3)<br>Patient + provider intervention: -4.8 (10.9)<br>Usual care: -4.6 (10.1) | ✗                     |                 | L          | L            | H/UC         | L             |
| Allen (2016) [RCT] <sup>254</sup>       |                                                                                                                                                                                                                                                                                       | WOMAC function, difference between <u>intervention and control at 12 months (95% CI)</u><br>-3.3 (-5.7, -1.0)                                                                                            | ✓                     |                 | L          | H/UC         | H/UC         | L             |
| Christensen (2015) [RCT] <sup>255</sup> | <u>Diet vs control, change BL-68 weeks</u><br>SMD 0.07 (-0.28, 0.42)<br><u>Exercise vs control, change BL-68 weeks</u><br>SMD 0.06 (-0.28, 0.41)                                                                                                                                      | VAS disability, change BL-68 weeks, mean (SD ‡)<br>Diet: -7.5 (21.8)<br>Exercise: -7.6 (22.0)<br>Control: -9.0 (22.0)                                                                                    | ✗                     |                 | L          | L            | H/UC         | L             |
| Messier (2013) [RCT] <sup>26</sup>      | <u>Diet + exercise vs diet at 18 months</u><br>SMD -0.29 (-0.51, -0.06)<br><u>Diet + exercise vs exercise at 18 months</u><br>SMD -0.30 (-0.53, -0.07)                                                                                                                                | WOMAC Function, BL / 18 months, mean (SD ‡)<br>Diet: 24.8 (10.4) / 17.7 (12.9)<br>Exercise: 23.1 (10.6) / 17.6 (11.2)<br>Diet + exercise: 24.6 (12.0) / 14.2 (11.6)                                      | ✓                     |                 | L          | H/UC         | H/UC         | L             |

‡ SD calculated from 95% CI

Alloc. Conc. = allocation concealment, AMSTAR2 = Assessing the Methodological Quality of Systematic Reviews, BL = baseline, Blind. Asses. = Blinded assessors, Blind. Part. = blinded participants, CI = confidence interval, H/UC = high / unclear risk of bias, L = low risk of bias, OA = osteoarthritis, Rand. Seq. = random sequence generation, RCT = randomised controlled trial, SD = standard deviation, SMD = Standardised mean difference, SR = systematic review, WOMAC = Western Ontario and McMaster Universities Osteoarthritis Index

Table – Function (OA), results and quality assessment

| Study (date) [study type]               | Standardised result, SMD (95% CI) unless otherwise stated                                                                                                                                                                        | Natural result                                                                                                                                                                                                                      | Supports intervention | AMSTAR2 quality | Rand. Seq. | Alloc. Conc. | Blind. Part. | Blind. Asses. |
|-----------------------------------------|----------------------------------------------------------------------------------------------------------------------------------------------------------------------------------------------------------------------------------|-------------------------------------------------------------------------------------------------------------------------------------------------------------------------------------------------------------------------------------|-----------------------|-----------------|------------|--------------|--------------|---------------|
| Somers (2012) [RCT] <sup>260</sup>      | <u>Pain coping vs control at week 24</u><br>SMD -0.17 (-0.55, 0.20)<br><u>Weight loss vs control at week 24</u><br>SMD -0.11 (-0.49, 0.26)<br><u>Pain coping + weight loss vs control at week 24</u><br>SMD -0.96 (-1.36, -0.57) | <u>WOMAC Function, BL / 24 weeks, mean (SD ‡)</u><br>Pain coping: 46.2 (20.2) / 35.2 (13.4)<br>Weight loss: 44.3 (18.6) / 36.0 (13.1)<br>Pain coping + weight loss: 47.7 (21.9) / 25.1 (12.5)<br>Control: 46.1 (23.3) / 37.5 (13.3) | ✓                     |                 | L          | L            | H/UC         | L             |
| Bliddal (2011) [RCT] <sup>261</sup>     | <u>Very low vs low calories, change BL-52 weeks</u><br>SMD -0.27 (-0.69, 0.15)                                                                                                                                                   | <u>WOMAC Function, change BL-52 weeks, mean (SD †)</u><br>Very low calories: -7.5 (13.3)<br>Low calories: -3.9 (13.4)                                                                                                               | ✗                     |                 | L          | L            | H/UC         | L             |
| Gudbergson (2011) [RCT] <sup>263</sup>  |                                                                                                                                                                                                                                  | <u>WOMAC Function, change BL-6 months, mean difference between low calorie and control (95% CI)</u><br>-266 (-468.9, -63.1)                                                                                                         | ✓                     |                 | L          | L            | H/UC         | L             |
| Riecke (2010) [RCT] <sup>264</sup>      | <u>Low vs very low calories, change BL-16 weeks</u><br>SMD 0.08 (-0.20, 0.37)                                                                                                                                                    | <u>WOMAC function, change BL-16 week, mean (SD †)</u><br>Low calories: -12.75 (18.9)<br>Very low calories: -14.44 (22.0)                                                                                                            | ✗                     |                 | L          | L            | H/UC         | L             |
| Ravaud (2009) [RCT] <sup>265</sup>      | <u>Weight-loss session vs control, change BL-4 months</u><br>SMD -0.16 (-0.37, 0.06)<br><u>Weight-loss session vs control, change BL-12 months</u><br>SMD -0.26 (-0.48, -0.04)                                                   | <u>WOMAC Function, change bl-4 months / bl-12 months, mean (SD)</u><br>Weight loss sessions: -5.74 (10.66) / -8.67 (12.05)<br>Control: -4.03 (11.35) / -5.44 (12.97)                                                                | ✓                     |                 | L          | L            | H/UC         | H/UC          |
| Miller (2006) [RCT] <sup>267</sup>      | <u>Weight loss vs control at 6 months</u><br>SMD -0.74 (-1.18, -0.31)                                                                                                                                                            | <u>WOMAC Function, BL / 6 months, mean (SD †)</u><br>Weight loss: 24.0 (9.9) / 15.2 (9.9)<br>Control: 26.7 (12.5) / 23.8 (13.1)                                                                                                     | ✓                     |                 | H/UC       | H/UC         | H/UC         | H/UC          |
| Christensen (2005) [RCT] <sup>262</sup> | <u>Very low vs low calories, change BL-8 weeks</u><br>SMD -0.52 (-0.97, -0.07)                                                                                                                                                   | <u>WOMAC Function, change BL-8 weeks, mean (SD †)</u><br>Very low calories: -252.5 (313.7)<br>Low calories: -85.6 (328.2)                                                                                                           | ✓                     |                 | L          | H/UC         | H/UC         | H/UC          |

† SD calculated from standard error

‡ SD calculated from 95% CI

Alloc. Conc. = allocation concealment, AMSTAR2 = Assessing the Methodological Quality of Systematic Reviews, BL = baseline, Blind. Asses. = Blinded assessors, Blind. Part. = blinded participants, CI = confidence interval, H/UC = high / unclear risk of bias, L = low risk of bias, OA = osteoarthritis, Rand. Seq. = random sequence generation, RCT = randomised controlled trial, SD = standard deviation, SMD = Standardised mean difference, WOMAC = Western Ontario and McMaster Universities Osteoarthritis Index

Table – Function (OA), results and quality assessment

| Study (date) [study type]                                             | Standardised result, SMD (95% CI) unless otherwise stated                                                                                                                                                                                                                                                                                                                                                                                                                                          | Natural result                                                                                                                                                                                                                                                                                         | Supports intervention | AMSTAR2 quality | Rand. Seq. | Alloc. Conc. | Blind. Part. | Blind. Asses. |
|-----------------------------------------------------------------------|----------------------------------------------------------------------------------------------------------------------------------------------------------------------------------------------------------------------------------------------------------------------------------------------------------------------------------------------------------------------------------------------------------------------------------------------------------------------------------------------------|--------------------------------------------------------------------------------------------------------------------------------------------------------------------------------------------------------------------------------------------------------------------------------------------------------|-----------------------|-----------------|------------|--------------|--------------|---------------|
| Messier (2004) [RCT] <sup>25</sup>                                    | <u>Diet vs control, change BL-16 months</u><br>SMD 0.06 (-0.25, 0.37)<br><u>Exercise vs control, change BL-16 months</u><br>SMD -0.03 (-0.34, 0.28)<br><u>Exercise + diet vs control, change BL-16 months</u><br>SMD 0.17 (-0.14, 0.49)                                                                                                                                                                                                                                                            | <u>WOMAC Function, Change BL-18 months mean (SD ‡)</u><br>Diet: 4.23 (13.7)<br>Exercise: 3.07 (9.6)<br>Exercise + diet: 5.73 (13.8)<br>Control: 3.40 (13.2)                                                                                                                                            | ✘                     |                 | L          | L            | H/UC         | L             |
| Bespoke meta-analysis including <sup>25;251-253;255;260;265;267</sup> | <u>Weight loss interventions vs control</u><br>SMD -0.08 (-0.23, 0.08), I <sup>2</sup> 69.8%                                                                                                                                                                                                                                                                                                                                                                                                       |                                                                                                                                                                                                                                                                                                        | ✘                     |                 |            |              |              |               |
| Toda (2001) [NRT] <sup>270</sup>                                      | <u>NSAIDs + non-weight bearing exercise vs NSAIDs only, change BL-8 weeks</u><br>SMD -0.67 (-1.07, -0.27)<br><u>NSAIDs + walking vs NSAIDs only, change BL-8 weeks</u><br>SMD -0.19 (-0.62, 0.24)<br><u>NSAIDs + diet vs NSAIDs only, change BL-8 weeks</u><br>SMD -0.58 (-1.04, -0.12)<br><u>NSAIDs + diet + strength exercises vs NSAIDs only, change BL-8 weeks</u><br>SMD -1.64 (-2.13, -1.15)<br><u>NSAIDs + diet + walking vs NSAIDs only, change BL-8 weeks</u><br>SMD -0.73 (-1.22, -0.25) | <u>Function (Lequesne index), mean (SD) change BL - 8 weeks</u><br>NSAIDs only: -0.39 (2.8)<br>NSAIDs + non-weight bearing exercises: -2.4 (3.2)<br>NSAIDs + walking: -1.1 (4.7)<br>NSAIDs + diet: -2.5 (4.8)<br>NSAIDs + diet + strength exercises: -6.3 (4.5)<br>NSAIDs + diet + walking: -2.6 (3.4) | ✓                     |                 |            |              |              |               |
| Bartholdy (2019) [Single arm int.] <sup>272</sup>                     |                                                                                                                                                                                                                                                                                                                                                                                                                                                                                                    | <u>KOOS Function, change bl-8 weeks, mean (95%CI)</u><br>Unadjusted: 14.5 (12.6, 16.4)<br>Adjusted: 14.6 (12.6, 16.5)                                                                                                                                                                                  | ✓                     |                 |            |              |              |               |
| Atukorala (2016) [Single arm int.] <sup>274</sup>                     |                                                                                                                                                                                                                                                                                                                                                                                                                                                                                                    | <u>KOOS Function mean change BL - 18 weeks (SD)</u><br>≤2.5% weight loss: 7.8 (13.3)<br>2.5-5% weight loss: 8.9 (14.7)<br>5-7.5% weight loss: 12.0 (16.7)<br>7.5-10% weight loss: 13.6 (15.5)<br>≥10% weight loss: 17.4 (16.3)                                                                         | ✓                     |                 |            |              |              |               |

‡ SD calculated from 95% CI

Alloc. Conc. = allocation concealment, AMSTAR2 = Assessing the Methodological Quality of Systematic Reviews, BL = baseline, Blind. Asses. = Blinded assessors, Blind. Part. = blinded participants, CI = confidence interval, H/UC = high / unclear risk of bias, KOOS = knee injury and osteoarthritis outcome score, L = low risk of bias, NRT = non-randomised trial, OA = osteoarthritis, Rand. Seq. = random sequence generation, RCT = randomised controlled trial, SD = standard deviation, SMD = Standardised mean difference, WOMAC = Western Ontario and McMaster Universities Osteoarthritis Index

Table – Function (OA), results and quality assessment

| Study (date) [study type]                       | Standardised result, SMD (95% CI) unless otherwise stated | Natural result                                                                                                                       | Supports intervention | AMSTAR2 quality | Rand. Seq. | Alloc. Conc. | Blind. Part. | Blind. Asses. |
|-------------------------------------------------|-----------------------------------------------------------|--------------------------------------------------------------------------------------------------------------------------------------|-----------------------|-----------------|------------|--------------|--------------|---------------|
| Bartels (2014) [Single arm int.] <sup>275</sup> |                                                           | <u>KOOS Function, mean change from BL-16 weeks, unadjusted mean (SD) / adjusted mean (95% CI)</u><br>12.1 (14.1) / 12.5 (10.0, 15.1) | ✓                     |                 |            |              |              |               |
| Paans (2013) [Single arm int.] <sup>276</sup>   |                                                           | <u>WOMAC Function, BL / 8 months, mean (SD †)</u><br><u>[recoded WOMAC so that 100 = best outcome]</u><br>53.0 (15.9) / 70.3 (14.8)  | ✓                     |                 |            |              |              |               |

† SD calculated from 95% CI

Alloc. Conc. = allocation concealment, AMSTAR2 = Assessing the Methodological Quality of Systematic Reviews, BL = baseline, Blind. Asses. = Blinded assessors, Blind. Part. = blinded participants, CI = confidence interval, H/UC = high / unclear risk of bias, KOOS = knee injury and osteoarthritis outcome score, L = low risk of bias, OA = osteoarthritis, Rand. Seq. = random sequence generation, RCT = randomised controlled trial, SD = standard deviation, SMD = Standardised mean difference, WOMAC = Western Ontario and McMaster Universities Osteoarthritis Index

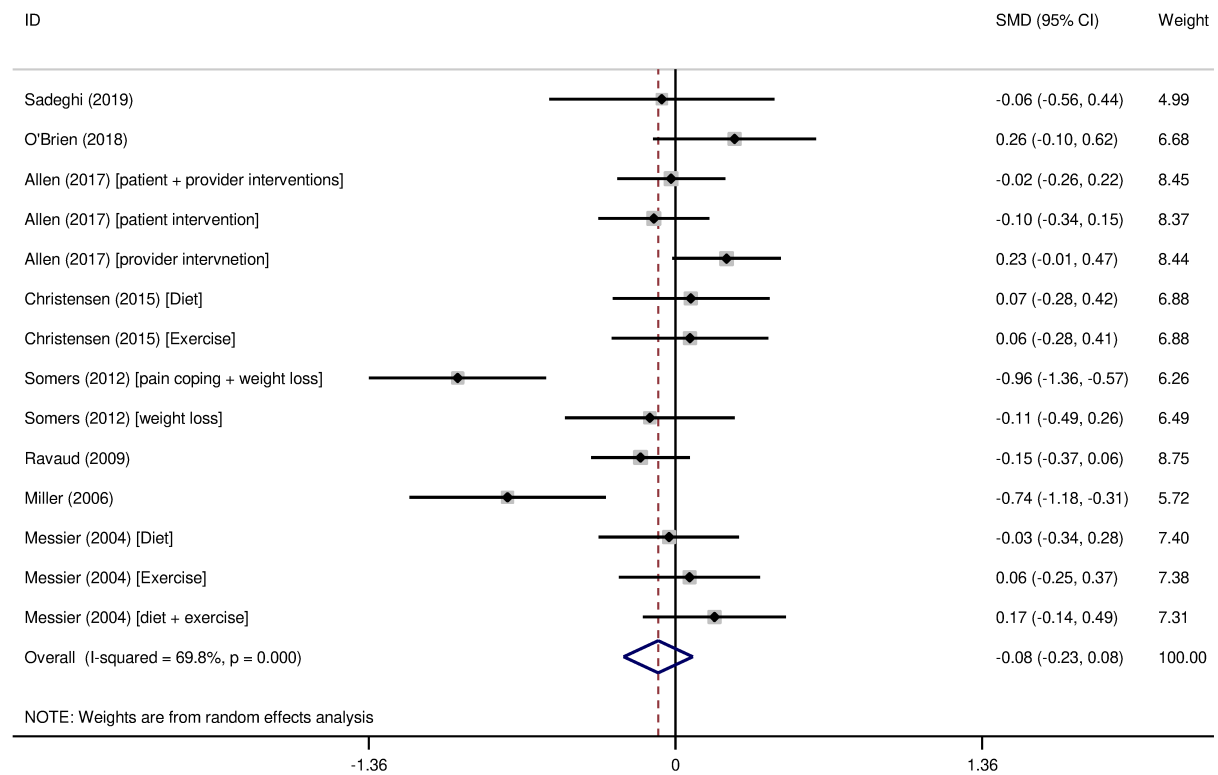

Figure – Weight loss interventions vs control - outcome = Function

## Supplementary table 94 – Function outcomes from observational studies in OA

Table – Function (OA), results and quality assessment of observational studies

| Study (date) [study type]                            | Results                                                                                                                                                                                       | Weight associated with outcome | AMSTAR2  | Study Pop. | Attr. | Prog. Meas. | Outc. Meas. | Conf. | Stats. |
|------------------------------------------------------|-----------------------------------------------------------------------------------------------------------------------------------------------------------------------------------------------|--------------------------------|----------|------------|-------|-------------|-------------|-------|--------|
| Pozzobon (2018) [MA] <sup>18</sup>                   | <u>Function after arthroplasty, non-obese vs obese</u><br>Short-term: SMD -0.16 (-0.42, 0.10)<br>Long-term: SMD -0.32 (-0.37, -0.28)                                                          | ✓                              | Low      |            |       |             |             |       |        |
| de Rooij (2016) [SR] <sup>38</sup>                   | One out of three studies reported BMI was associated with function in hip OA                                                                                                                  | ✗                              | Moderate |            |       |             |             |       |        |
| de Rooij (2016) [SR] <sup>22</sup>                   | Six out of 10 studies reported that BMI predicts pain                                                                                                                                         | ✓                              | Moderate |            |       |             |             |       |        |
| Jacobs (2018) [Prospective cohort] <sup>280</sup>    | <u>WOMAC Function, BL / 2 years, mean (SD)</u><br>Obese: 9.1 (10.3) / 9.4 (10.4)<br>Obese and depressed: 20.7 (16.1) / 25.1 (14.4)<br>Not obese: 6.8 (9.2) / 7.9 (9.9)                        | ✗                              |          | L          | L     | L           | L           | L     | M      |
| Magnusson (2015) [Prospective cohort] <sup>290</sup> | <u>AUSCAN function, over follow-up, regression coefficient (95% CI)</u><br>BMI longitudinal: -0.15 (-0.71, 0.41)                                                                              | ✗                              |          | L          | M     | L           | L           | L     | M      |
| Sands (2012) [Prospective cohort] <sup>296</sup>     | <u>WOMAC function, change BL-22 weeks, mean (SE) [unadjusted]</u><br>Celecoxib daily: BMI<30: 0.89 (0.74); BMI ≥30: 1.36 (0.71)<br>Celecoxib flare: BMI<30: 3.40 (0.74); BMI ≥30: 3.45 (0.71) | ✗                              |          | L          | L     | M           | L           | H     | M      |
| Richette (2011) [Prospective cohort] <sup>300</sup>  | <u>WOMAC function, BL / after surgery, mean (SD)</u><br>643.9 (424.2) / 272.6 (289) p<0.0001                                                                                                  | ✓                              |          | L          | M     | L           | L           | M     | M      |
| Sharma (2003) [Prospective cohort] <sup>312</sup>    | <u>Poor physical function WOMAC score, OR (95%CI)</u><br>Unadjusted: OR 1.26 per 5 unit increase in BMI (1.01-1.57)<br>Adjusted: OR 1.14 per 5 unit increase in BMI (0.89-1.46)               | ✗                              |          | L          | L     | L           | L           | L     | M      |

Attr. = attrition, AUSCAN = Australian Canadian Osteoarthritis Hand Index, BL = baseline, BMI = body mass index CI = confidence interval, Conf. = confounding, L = low risk of bias, M = moderate risk of bias, MA = meta-analysis, Outc. Meas = outcome measurement, Prog. Meas. = prognostic factor measurement, Pros = prospective, Rand. Seq. = random sequence generation, SD = standard deviation, SE = standard error, SMD = Standardised mean difference, SR = systematic review, Stats. = statistical analysis, Study Pop. = study population, VAS = visual analogue scale, WOMAC = Western Ontario and McMaster Universities Osteoarthritis Index

## Supplementary table 95 – Stiffness outcomes from weight-loss interventions in OA

Table – Stiffness (OA), results and quality assessment

| Study (date) [study type]                                  | Standardised result, SMD (95% CI) unless otherwise stated                                                                                                                                                                        | Natural result                                                                                                                                                                                                                       | Supports intervention | AMSTAR2 quality | Rand. Seq. | Alloc. Conc. | Blind. Part. | Blind. Asses. |
|------------------------------------------------------------|----------------------------------------------------------------------------------------------------------------------------------------------------------------------------------------------------------------------------------|--------------------------------------------------------------------------------------------------------------------------------------------------------------------------------------------------------------------------------------|-----------------------|-----------------|------------|--------------|--------------|---------------|
| Sadeghi (2019) [RCT] <sup>251</sup>                        | <u>Diet intervention vs control at 3 months</u><br>SMD -0.24 (-0.74, 0.26)                                                                                                                                                       | <u>WOMAC Stiffness, BL / 3 months, mean (SD)</u><br>Diet intervention: 87 (53) / 65.48 (50.1)<br>Control: 79 (64) / 79.03 (61.9)                                                                                                     | ✘                     |                 | H/UC       | H/UC         | H/UC         | H/UC          |
| O'Brien (2018) [RCT] <sup>252</sup>                        | <u>Telephone intervention vs control at week 26</u><br>SMD -0.10 (-0.46, 0.26)                                                                                                                                                   | <u>WOMAC Stiffness, BL / week 26 mean (SD)</u><br>Telephone weight loss: 4.0 (2.1) / 4.0 (2.0)<br>Control: 4.3 (1.5) / 4.2 (1.9)                                                                                                     | ✘                     |                 | L          | L            | H/UC         | L             |
| Somers (2012) [RCT] <sup>260</sup>                         | <u>Pain coping vs control at week 24</u><br>SMD -0.10 (-0.48, 0.27)<br><u>Weight loss vs control at week 24</u><br>SMD -0.04 (-0.41, 0.34)<br><u>Pain coping + weight loss vs control at week 24</u><br>SMD -0.63 (-1.01, -0.25) | <u>WOMAC Stiffness, BL / 24 weeks, mean (SD †)</u><br>Pain coping: 54.7 (25.3) / 44.5 (18.8)<br>Weight loss: 50.7 (23.7) / 45.7 (17.6)<br>Pain coping + weight loss: 61.5 (23.5) / 35.4 (16.9)<br>Control: 53.2 (26.8) / 46.4 (18.2) | ✓                     |                 | L          | L            | H/UC         | L             |
| Bliddal (2011) [RCT] <sup>261</sup>                        | <u>Very low vs low calories, change BL-52 weeks</u><br>SMD -0.13 (-0.54, 0.29)                                                                                                                                                   | <u>WOMAC Stiffness, change bl-52 weeks, mean (SD †)</u><br>Very low calories: -6.2 (17.9)<br>Low calories -3.9 (18.1)                                                                                                                | ✘                     |                 | L          | L            | H/UC         | L             |
| Miller (2006) [RCT] <sup>267</sup>                         | <u>Weight loss vs control at 6 months</u><br>SMD -0.06 (-0.48, 0.36)                                                                                                                                                             | <u>WOMAC Stiffness, BL / 6 months, mean (SD †)</u><br>Weight loss: 3.3 (1.3) / 3.0 (1.3)<br>Control: 3.6 (1.3) / 3.1 (2.0)                                                                                                           | ✘                     |                 | H/UC       | H/UC         | H/UC         | H/UC          |
| Christensen (2005) [RCT] <sup>262</sup>                    | <u>Very low vs low calories, change BL-8 weeks</u><br>SMD -0.27 (-0.71, 0.17)                                                                                                                                                    | <u>WOMAC Stiffness, change BL-8 weeks, mean (SD †)</u><br>Very low calories: -22.6 (45.5)<br>Low calories: -10.2 (46.8)                                                                                                              | ✘                     |                 | L          | H/UC         | H/UC         | H/UC          |
| Bespoke meta-analysis including <sup>251;252;260;267</sup> | <u>Weight loss interventions vs control</u><br>SMD -0.21 (-0.44, 0.01), I <sup>2</sup> 36.7%                                                                                                                                     |                                                                                                                                                                                                                                      | ✓                     |                 |            |              |              |               |
| Paans (2013) [Single arm int.] <sup>276</sup>              |                                                                                                                                                                                                                                  | <u>WOMAC Stiffness, BL / 8 months, mean (SD †)</u><br>[recorded WOMAC so that 100 = best outcome]<br>49.6 (3.6) / 66.4 (2.3)                                                                                                         | ✓                     |                 |            |              |              |               |

† SD calculated from standard error

‡ SD calculated from 95% CI

Alloc. Conc. = allocation concealment, AMSTAR2 = Assessing the Methodological Quality of Systematic Reviews, BL = baseline, Blind. Asses. = Blinded assessors, Blind. Part. = blinded participants, CI = confidence interval, H/UC = high / unclear risk of bias, L = low risk of bias, OA = osteoarthritis, Rand. Seq. = random sequence generation, RCT = randomised controlled trial, SD = standard deviation, SMD = Standardised mean difference, WOMAC = Western Ontario and McMaster Universities Osteoarthritis Index

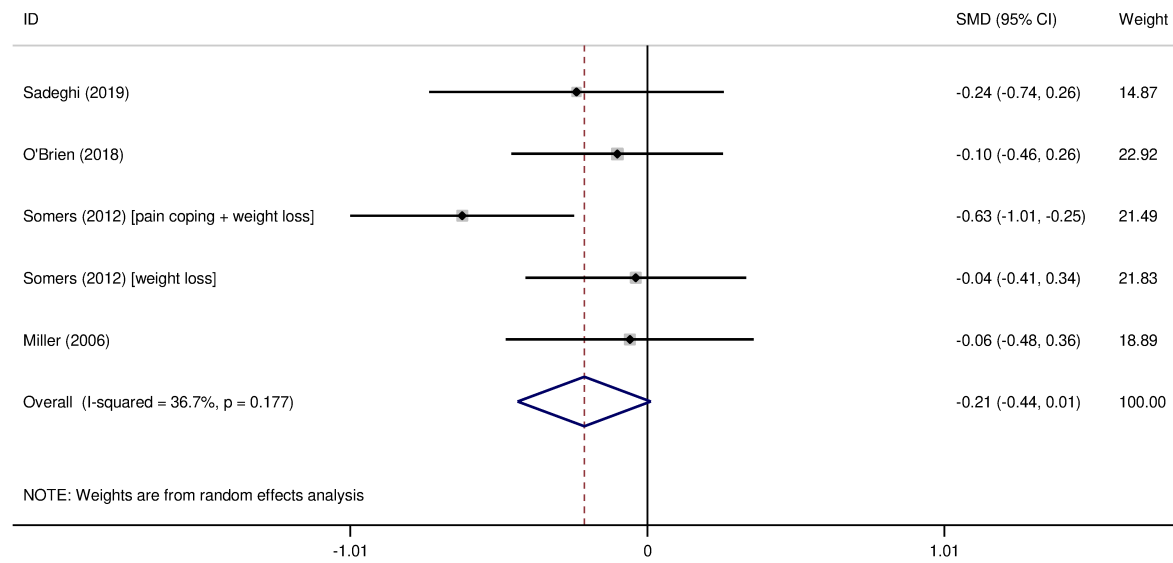

Figure – Weight loss interventions vs control - outcome = stiffness



## Supplementary table 96 – Stiffness outcomes from observational studies in OA

Table – Stiffness (OA), results and quality assessment of observational studies

| Study (date) [study type]                              | Results                                                                                                                                                                                 | Weight associated with outcome | Study Pop. | Attr. | Prog. Meas. | Outc. Meas. | Conf. | Stats. |
|--------------------------------------------------------|-----------------------------------------------------------------------------------------------------------------------------------------------------------------------------------------|--------------------------------|------------|-------|-------------|-------------|-------|--------|
| Sands (2012)<br>[Prospective cohort] <sup>296</sup>    | WOMAC Stiffness, change BL-22 weeks, mean (SE) [unadjusted]<br>Celecoxib daily: BMI<30: 0.10 (0.10); BMI>=30: 0.13 (0.10)<br>Celecoxib flare: BMI<30: 0.42 (0.10); BMI>=30: 0.38 (0.10) | *                              | L          | L     | L           | L           | H     | M      |
| Richette (2011)<br>[Prospective cohort] <sup>300</sup> | WOMAC Stiffness, BL / after surgery, mean (SD)<br>68.2 (53.8) / 36.4 (41.9) <0.0001                                                                                                     | ✓                              | L          | M     | L           | L           | M     | M      |

Attr. = attrition, BL = baseline, BMI = body mass index, Conf. = confounding, L = low risk of bias, M = moderate risk of bias, Outc. Meas = outcome measurement, Prog. Meas. = prognostic factor measurement, Pros = prospective, Rand. Seq. = random sequence generation, SD = standard deviation, SE = standard error, SMD = Standardised mean difference, Stats. = statistical analysis, Study Pop. = study population, WOMAC = Western Ontario and McMaster Universities Osteoarthritis Index

## Supplementary table 97 – QoL outcomes from weight-loss interventions in OA

Table – QoL (OA), results and quality assessment

| Study (date) [study type]                         | Standardised result, SMD (95% CI) unless otherwise stated                                                                                        | Natural result                                                                                                               | Supports intervention | AMSTAR2 quality | Rand. Seq. | Alloc. Conc. | Blind. Part. | Blind. Asses. |
|---------------------------------------------------|--------------------------------------------------------------------------------------------------------------------------------------------------|------------------------------------------------------------------------------------------------------------------------------|-----------------------|-----------------|------------|--------------|--------------|---------------|
| Christensen (2015) [RCT] <sup>255</sup>           | <u>Diet vs control, change BL-68 weeks</u><br>SMD 0.18 (-0.16, 0.53)<br><u>Exercise vs control, change BL-68 weeks</u><br>SMD 0.03 (-0.32, 0.37) | <u>KOOS QoL, change BL-68 weeks, mean (SD ‡)</u><br>Diet: 8.2 (15.1)<br>Exercise: 5.8 (15.1)<br>Control: 5.4 (15.3)          | ✘                     |                 | L          | L            | H/UC         | L             |
| Riecke (2010) [RCT] <sup>264</sup>                | <u>Low vs very low calories, change BL-16 weeks</u><br>SMD 0.03 (-0.25, 0.32)                                                                    | <u>KOOS QoL, change BL-16 week, mean (SD †)</u><br>Low calories: 8.85 (15.7)<br>Very low calories: 8.31 (16.1)               | ✘                     |                 | L          | L            | H/UC         | L             |
| Bartholdy (2019) [Single arm int.] <sup>272</sup> |                                                                                                                                                  | <u>KOOS QoL, change bl-8 weeks, mean (95% CI)</u><br>Unadjusted: 8.9 (6.5, 11.4)<br>Adjusted: 8.6 (6.0, 11.2)                | ✓                     |                 |            |              |              |               |
| Bartels (2014) [Single arm int.] <sup>275</sup>   |                                                                                                                                                  | <u>KOOS QOL, mean change from BL-16 weeks, unadjusted mean (SD) / adjusted mean (95% CI)</u><br>9.4 (16.4) / 8.1 (5.1, 11.1) | ✓                     |                 |            |              |              |               |

Alloc. Conc. = allocation concealment, AMSTAR2 = Assessing the Methodological Quality of Systematic Reviews, BL = baseline, Blind. Asses. = Blinded assessors, Blind. Part. = blinded participants, CI = confidence interval, H/UC = high / unclear risk of bias, KOOS = knee injury and osteoarthritis outcome score, L = low risk of bias, QoL = quality of life, OA = osteoarthritis, Rand. Seq. = random sequence generation, RCT = randomised controlled trial, SD = standard deviation, SMD = Standardised mean difference

## Supplementary table 98 – QoL outcomes from observational studies in OA

Table – QoL (OA), results and quality assessment of observational studies

| Study (date) [study type]                            | Results                                                                                                                                                                | Weight associated with outcome | Study Pop. | Attr. | Prog. Meas. | Outc. Meas. | Conf. | Stats. |
|------------------------------------------------------|------------------------------------------------------------------------------------------------------------------------------------------------------------------------|--------------------------------|------------|-------|-------------|-------------|-------|--------|
| Han (2018)<br>[Prospective cohort] <sup>279</sup>    | <u>QoL trajectory, RR (95% CI) [Adjusted]</u><br>moderate vs low QoL – RR 0.95 per unit BMI (0.91, 0.99)<br>high vs low QoL - RR 0.93 per unit BMI (0.88, 0.98)        | ✓                              | L          | M     | L           | L           | L     | L      |
| Jacobs (2018)<br>[Prospective cohort] <sup>280</sup> | <u>KOOS QoL, BL / 2 years, mean (SD)</u><br>Obese: 64.1 (19.7) / 66.3 (21.8)<br>Obese and depressed: 48.7 (24.6) / 44.3 (21.6)<br>Not obese: 66.8 (20.7) / 68.7 (21.9) | ✘                              | L          | L     | L           | L           | L     | M      |

Attr. = attrition, BI = baseline, BMI = body mass index, CI = confidence interval, Conf. = confounding, KOOS = knee injury and osteoarthritis outcome score, L = low risk of bias, M = moderate risk of bias, Outc. Meas = outcome measurement, Prog. Meas. = prognostic factor measurement, Pros = prospective, QoL = quality of life, Rand. Seq. = random sequence generation, RR = relative risk, SD = standard deviation, SE = standard error, SMD = Standardised mean difference, Stats. = statistical analysis, Study Pop. = study population

## Supplementary table 99 – Patient global outcomes from weight-loss interventions in OA

Table – Patient global (OA), results and quality assessment

| Study (date) [study type]                          | Standardised result, SMD (95% CI) unless otherwise stated                                                                                                                       | Natural result                                                                                                                                                       | Supports intervention | AMSTAR2 quality | Rand. Seq. | Alloc. Conc. | Blind. Part. | Blind. Asses. |
|----------------------------------------------------|---------------------------------------------------------------------------------------------------------------------------------------------------------------------------------|----------------------------------------------------------------------------------------------------------------------------------------------------------------------|-----------------------|-----------------|------------|--------------|--------------|---------------|
| Christensen (2015) [RCT] <sup>255</sup>            | <u>Diet vs control, change BL-68 weeks</u><br>SMD 0.05 (-0.30, 0.40)<br><u>Exercise vs control, change BL-68 weeks</u><br>SMD 0.07 (-0.27, 0.42)                                | <u>Patient global VAS, change BL-68 weeks, mean (SD ±)</u><br>Diet: -5.1 (20.4)<br>Exercise: -4.6 (20.4)<br>Control: -6.1 (20.4)                                     | *                     |                 | L          | L            | H/UC         | L             |
| Riecke (2010) [RCT] <sup>264</sup>                 | <u>Low vs very low calories, change BL-16 weeks</u><br>SMD -0.09 (-0.38, 0.19)                                                                                                  | <u>WOMAC Global, change BL-16 week, mean (SD †)</u><br>Low calories: -11.54 (20.5)<br>Very low calories: -9.64 (20.8)                                                | *                     |                 | L          | L            | H/UC         | L             |
| Ravaud (2009) [RCT] <sup>265</sup>                 | <u>Weight-loss session vs control, change BL-4 months</u><br>SMD -0.32 (-0.54, -0.10)<br><u>Weight-loss session vs control, change BL-12 months</u><br>SMD -0.35 (-0.57, -0.13) | <u>Patient global VAS, change bl-4 months / bl-12 months, mean (SD)</u><br>Weight-loss sessions: -1.66 (2.26) / -1.40 (2.56)<br>Control: -0.90 (2.48) / -0.51 (2.59) | ✓                     |                 | L          | L            | H/UC         | H/UC          |
| Bespoke meta-analysis including <sup>255;265</sup> | <u>Weight loss interventions vs control</u><br>SMD -0.09 (-0.37, 0.18), I <sup>2</sup> 61.1%                                                                                    |                                                                                                                                                                      | *                     |                 |            |              |              |               |

Alloc. Conc. = allocation concealment, AMSTAR2 = Assessing the Methodological Quality of Systematic Reviews, BL = baseline, Blind. Asses. = Blinded assessors, Blind. Part. = blinded participants, CI = confidence interval, H/UC = high / unclear risk of bias, L = low risk of bias, OA = osteoarthritis, Rand. Seq. = random sequence generation, RCT = randomised controlled trial, SMD = Standardised mean difference, VAS = visual analogue scale

## Supplementary table 100 – Patient global outcomes from observational studies in OA

Table – Patient global (OA), results and quality assessment of observational studies

| Study (date) [study type]                              | Results                                                                                                                                                                                                                                                                                    | Weight associated with outcome | Study Pop. | Attr. | Prog. Meas. | Outc. Meas. | Conf. | Stats. |
|--------------------------------------------------------|--------------------------------------------------------------------------------------------------------------------------------------------------------------------------------------------------------------------------------------------------------------------------------------------|--------------------------------|------------|-------|-------------|-------------|-------|--------|
| Richette (2011)<br>[Prospective cohort] <sup>300</sup> | <u>Patient global VAS, BL / after surgery, mean (SD)</u><br>51.6 (26.5) / 25.3 (20.9) p<0.0001                                                                                                                                                                                             | ✓                              | L          | M     | L           | L           | M     | M      |
| Detora (2001)<br>[Prospective cohort] <sup>315</sup>   | <u>Patient global, difference from placebo (95% CI)</u><br><u>12.5mg rofecoxib:</u><br>≤28 BMI: -0.7 (-0.9, -0.5)<br>28-33 BMI: -0.9 (-1.1, -0.6)<br>≥33 BMI: -1.1 (-1.3, -0.8)<br><u>25mg</u><br>≤28 BMI: -1.0 (-1.3, -0.8)<br>28-33 BMI: -0.9 (-1.1, -0.6)<br>≥33 BMI: -1.1 (-1.3, -0.9) | ✗                              | L          | M     | M           | L           | M     | M      |
| Berkhout (1985)<br>[Prospective cohort] <sup>320</sup> | <u>Global improvement score, obese / not obese, %</u><br>Localised OA: 56% / 54%<br>Generalised OA: 32% / 62%                                                                                                                                                                              | ✓                              | L          | L     | L           | M           | H     | H      |

Attr. = attrition, BL = baseline, BMI = body mass index, CI = confidence interval, Conf. = confounding, L = low risk of bias, M = moderate risk of bias, Outc. Meas = outcome measurement, Prog. Meas. = prognostic factor measurement, Pros = prospective, Rand. Seq. = random sequence generation, SD = standard deviation, SE = standard error, Stats. = statistical analysis, Study Pop. = study population, VAS = visual analogue scale

## Supplementary table 101 – Depression outcomes from weight-loss interventions in OA

Table – Depression (OA), results and quality assessment

| Study (date) [study type]         | Standardised result, SMD (95% CI) unless otherwise stated | Natural result                                                                                           | Supports intervention | AMSTAR2 quality | Rand. Seq. | Alloc. Conc. | Blind. Part. | Blind. Asses. |
|-----------------------------------|-----------------------------------------------------------|----------------------------------------------------------------------------------------------------------|-----------------------|-----------------|------------|--------------|--------------|---------------|
| Allen (2016) [RCT] <sup>254</sup> |                                                           | Depression (PHQ8), difference between intervention and control at 12 months (95% CI)<br>-0.6 (-1.5, 0.3) | *                     |                 | L          | H/UC         | H/UC         | L             |

Alloc. Conc. = allocation concealment, AMSTAR2 = Assessing the Methodological Quality of Systematic Reviews, Blind. Asses. = Blinded assessors, Blind. Part. = blinded participants, CI = confidence interval, H/UC = high / unclear risk of bias, L = low risk of bias, OA = osteoarthritis, PHQ-8 = Patient Health Questionnaire depression scale, Rand. Seq. = random sequence generation, RCT = randomised controlled trial

## Supplementary table 102 – Radiographic outcomes from observational studies in OA

Table – Radiographic progression (OA), results and quality assessment of observational studies

| Study (date) [study type]                             | Results                                                                                                                                                                                                      | Weight associated with outcome | AMSTAR2  | Study Pop. | Attr. | Prog. Meas. | Outc. Meas. | Conf. | Stats. |
|-------------------------------------------------------|--------------------------------------------------------------------------------------------------------------------------------------------------------------------------------------------------------------|--------------------------------|----------|------------|-------|-------------|-------------|-------|--------|
| Bastick (2015) [SR] <sup>23</sup>                     | Conflicting evidence – 12/25 studies reported a significant association                                                                                                                                      | ✘                              | Moderate |            |       |             |             |       |        |
| Chatterjee (2015) [Prospective cohort] <sup>287</sup> | BMI not associated with Tegner Lysholm knee score (no data)                                                                                                                                                  | ✘                              |          | L          | M     | L           | L           | H     | H      |
| Magnusson (2015) [Prospective cohort] <sup>290</sup>  | <u>KL sum score (0-120) over follow-up, regression coefficient (95% CI)</u><br>BMI longitudinal: -0.27 (-0.83, 0.29) [adjusted]                                                                              | ✘                              |          | L          | M     | L           | L           | L     | M      |
| Miyazaki (2012) [Prospective cohort] <sup>294</sup>   | <u>Radiographic progression, OR (95%CI)</u><br>OR per unit BMI: 1.24 (1.04, 1.45) [adjusted]                                                                                                                 | ✓                              |          | L          | M     | L           | L           | L     | M      |
| Nishimura (2011) [Prospective cohort] <sup>299</sup>  | <u>Progression of knee OA, OR (95% CI)</u><br>OR per unit BMI 0.932 (0.779, 1.114) [adjusted]                                                                                                                | ✘                              |          | L          | L     | L           | L           | L     | M      |
| Woollard (2011) [Prospective cohort] <sup>301</sup>   | <u>Comparison progression versus non-progression:</u><br>median BMI = 30 vs 26 [no statistical test performed]                                                                                               | ✘                              |          | H          | L     | L           | L           | H     | H      |
| Yusuf (2011) [Prospective cohort] <sup>302</sup>      | <u>OA progression, adjusted RR (95%CI):</u><br>Normal: ref<br>Overweight: 2.4 (1.3 to 3.6)<br>Obese: 2.9 (1.7 to 4.1)                                                                                        | ✓                              |          | L          | L     | L           | L           | L     | M      |
| Reijman (2007) [Prospective cohort] <sup>309</sup>    | <u>KL grade increase knee / hip, OR (95% CI) [adj]</u><br>≤25 BMI: ref<br>>25-27.5: 1 (0.5, 2.0) / 1.1 (0.8, 1.6)<br>>27.5: 2.1 (1.2, 3.7) / 1.3 (0.9, 1.8)                                                  | Knee: ✓<br>Hip: ✘              |          | L          | L     | L           | L           | M     | M      |
| Cooper (2000) [Prospective cohort] <sup>316</sup>     | <u>Radiographic progression, 1+ grade / 2+ grade, OR (95% CI)</u><br>Low (BMI <22.7): ref<br>Middle (BMI 22.7-25.4): 2.3 (0.8, 6.4) / 1.8 (0.4, 8.2)<br>Highest (BMI >25.4): 2.6 (1.0, 6.8) / 1.3 (0.3, 5.0) | ✓                              |          | L          | M     | L           | L           | L     | L      |
| Harris (1994) [Prospective cohort] <sup>317</sup>     | <u>Radiographic knee progression, mean BMI</u><br>minor progression: mean BMI 25.8<br>severe progression: mean BMI 28.0                                                                                      | ✘                              |          | M          | M     | L           | M           | H     | H      |
| Ledingham (1993) [Prospective cohort] <sup>318</sup>  | BMI did not predict radiographic progression                                                                                                                                                                 | ✘                              |          | M          | L     | L           | L           | M     | H      |
| Ahn (2016) [Retrospective cohort] <sup>321</sup>      | <u>OA progression, OR (95% CI)</u><br>OR per unit BMI: 0.958 (0.760, 1.209) unvariable<br>[not included in multivariable analysis]                                                                           | ✘                              |          | H          | M     | L           | L           | H     | H      |

Attr. = attrition, BMI = body mass index, BL = baseline, CI = confidence interval, Conf. = confounding, KL = Kellgren-Laurence, L = low risk of bias, M = moderate risk of bias, OR = odds ratio, Outc. Meas = outcome measurement, Prog. Meas. = prognostic factor measurement, Pros = prospective, Rand. Seq. = random sequence generation, SD = standard deviation, SE = standard error, Stats. = statistical analysis, Study Pop. = study population, VAS = visual analogue scale, WOMAC = Western Ontario and McMaster Universities Osteoarthritis Index

## Supplementary table 103 – Joint-space narrowing outcomes from weight-loss interventions in OA

Table – Joint space narrowing (OA), results and quality assessment

| Study (date) [study type]          | Standardised result, SMD (95% CI) unless otherwise stated                                                                                                           | Natural result                                                                                                                           | Supports intervention | AMSTAR2 quality | Rand. Seq. | Alloc. Conc. | Blind. Part. | Blind. Asses. |
|------------------------------------|---------------------------------------------------------------------------------------------------------------------------------------------------------------------|------------------------------------------------------------------------------------------------------------------------------------------|-----------------------|-----------------|------------|--------------|--------------|---------------|
| Hunter (2015) [RCT] <sup>256</sup> | <u>Diet + exercise vs diet, change BL-18 months</u><br>SMD 0.01 (-0.22, 0.23)<br><u>Diet + exercise vs exercise, change BL-18 months</u><br>SMD -0.06 (-0.28, 0.17) | <u>Joint space width, change BL-18 months, mean (SD ±)</u><br>Diet: -0.28 (1.6)<br>Exercise: -0.18 (1.6)<br>Diet + exercise: -0.27 (1.6) | *                     |                 | L          | H/UC         | H/UC         | H/UC          |

‡ SD calculated from 95% CI

Alloc. Conc. = allocation concealment, AMSTAR2 = Assessing the Methodological Quality of Systematic Reviews, BL = baseline, Blind. Asses. = Blinded assessors, Blind. Part. = blinded participants, CI = confidence interval, H/UC = high / unclear risk of bias, L = low risk of bias, OA = osteoarthritis, Rand. Seq. = random sequence generation, RCT = randomised controlled trial, SD = standard deviation, SMD = Standardised mean difference



## Supplementary table 104 – Joint-space narrowing outcomes from observational studies in OA

Table – Joint space narrowing (OA), results and quality assessment of observational studies

| Study (date) [study type]                                  | Results                                                                                                                                                                                                                                                                                                                              | Weight associated with outcome | Study Pop. | Attr. | Prog. Meas. | Outc. Meas. | Conf. | Stats. |
|------------------------------------------------------------|--------------------------------------------------------------------------------------------------------------------------------------------------------------------------------------------------------------------------------------------------------------------------------------------------------------------------------------|--------------------------------|------------|-------|-------------|-------------|-------|--------|
| Karsdal (2015) [Prospective cohort] <sup>288</sup>         | <u>Joint space width, change baseline-2 years, Spearman's rho</u><br>BMI: rho -0.03 p=0.39                                                                                                                                                                                                                                           | ✘                              | L          | L     | L           | M           | L     | M      |
| Bartlett (2011) [Prospective cohort] <sup>297</sup>        | <u>Mean BL BMI across the different trajectories of joint space width over two years, mean (SD)</u><br>high flat: 28.8<br>moderate flat: 29.3<br>moderate low flat: 29.1<br>low flat: 29.7<br>minimal decline: 31.4*<br>moderate decline: 31.1 *<br>greatest decline: 27.9<br>* sig higher than moderate flat                        | ✓                              | L          | M     | L           | L           | M     | M      |
| Le Graverand (2009) [Prospective cohort] <sup>305</sup>    | <u>Joint space width at 12 months, correlation coefficient, (95% CI)</u><br>BL BMI: -0.148 (-0.388, 0.109)                                                                                                                                                                                                                           | ✘                              | L          | L     | L           | L           | H     | H      |
| Botha-Scheepers (2008) [Prospective cohort] <sup>306</sup> | <u>Joint space narrowing progression over 2 years, OR (95% CI) [adjusted]</u><br>BL BMI<30 : ref<br>BL BMI≥30 : 2.3 (0.9 - 5.8)                                                                                                                                                                                                      | ✓                              | L          | L     | L           | L           | M     | M      |
| Reijman (2007) [Prospective cohort] <sup>309</sup>         | <u>≥1mm JSN knee / hip change, OR (95% CI) [adj]</u><br>≤25 BMI: ref<br>>25-27.5: 1.2 (0.6, 2.4) / 0.9 (0.6, 1.3)<br>>27.5: 1.4 (0.8, 2.6) / 0.9 (0.6, 1.3)<br><u>&gt;1.5mm JSN knee / hip change, OR (95% CI) [adjusted]</u><br>≤25 BMI: ref<br>>25-27.5: 2.3 (0.7, 7.7) / 1.5 (0.6, 3.8)<br>>27.5: 3.2 (1.1, 9.7) / 1.5 (0.6, 3.7) | Knee: ✓<br>Hip: ✘              | L          | L     | L           | L           | M     | M      |
| Wolfe (2002) [Prospective cohort] <sup>314</sup>           | <u>Max radiographic narrowing, HR (95% CI) [adjusted]</u><br>BMI continuous: 1.03 (1.00 to 1.06)<br>2nd vs 1st tertile BMI: 1.21 (0.70, 2.08)<br>3rd vs 1st tertile BMI: 1.65 (1.00, 2.71)                                                                                                                                           | ✓                              | L          | M     | L           | L           | L     | L      |

Attr. = attrition, BL = baseline, BMI = body mass index, CI = confidence interval, Conf. = confounding, HR = hazard ratio, L = low risk of bias, M = moderate risk of bias, OR = odds ratio, Outc. Meas = outcome measurement, Prog. Meas. = prognostic factor measurement, Pros = prospective, Rand. Seq. = random sequence generation, SD = standard deviation, Stats. = statistical analysis, Study Pop. = study population,

## Supplementary table 105 – Bone mineral density outcomes from weight-loss interventions in OA

Table – Bone mineral density (OA), results and quality assessment

| Study (date) [study type]           | Standardised result, SMD (95% CI) unless otherwise stated                                                                                                                                                                                                                                                            | Natural result                                                                                                                                                                                                                                                                                                                                                                                          | Supports intervention | AMSTAR2 quality | Rand. Seq. | Alloc. Conc. | Blind. Part. | Blind. Asses. |
|-------------------------------------|----------------------------------------------------------------------------------------------------------------------------------------------------------------------------------------------------------------------------------------------------------------------------------------------------------------------|---------------------------------------------------------------------------------------------------------------------------------------------------------------------------------------------------------------------------------------------------------------------------------------------------------------------------------------------------------------------------------------------------------|-----------------------|-----------------|------------|--------------|--------------|---------------|
| Beavers (2014) [RCT] <sup>258</sup> | <u>Diet + exercise vs diet, change BL-18 months</u><br>Hip: SMD 0.15 (-0.14, 0.44)<br>Neck: SMD 0.03 (-0.25, 0.32)<br>Spine: SMD -0.12 (-0.41, 0.16)<br><u>Diet + exercise vs exercise, change BL-18 months</u><br>Hip: SMD -0.76 (-1.05, -0.47)<br>Neck: SMD -0.43 (-0.71, -0.15)<br>Spine: SMD -0.17 (-0.45, 0.11) | <u>BMD hip, change bl-18 months, mean (SD †)</u><br>Diet: -24.0 (30.4)<br>Exercise: -2.1 (10.4)<br>Diet + exercise: -19.4 (30.3)<br><u>BMD neck, change bl-18 months, mean (SD †)</u><br>Diet: -15.3 (27.5)<br>Exercise: -2.6 (27.6)<br>Diet + exercise: -14.4 (27.4)<br><u>BMD spine, change bl-18 months, mean (SD †)</u><br>Diet: 3.5 (35.9)<br>Exercise: 5.2 (36.1)<br>Diet + exercise: -0.9 (35.9) | ✓                     |                 | L          | H/UC         | H/UC         | L             |

† SD calculated from 95% CI

Alloc. Conc. = allocation concealment, AMSTAR2 = Assessing the Methodological Quality of Systematic Reviews, BL = baseline, BMD = bone mineral density, Blind. Asses. = Blinded assessors, Blind. Part. = blinded participants, CI = confidence interval, H/UC = high / unclear risk of bias, L = low risk of bias, OA = osteoarthritis, Rand. Seq. = random sequence generation, SD = standard deviation, SMD = Standardised mean difference

## Supplementary table 106 – Cartilage loss outcomes from weight-loss interventions in OA

Table – Cartilage loss (OA), results and quality assessment

| Study (date) [study type]             | Standardised result, SMD (95% CI) unless otherwise stated                                                                                                            | Natural result                                                                                                                                     | Supports intervention | AMSTAR2 quality | Rand. Seq. | Alloc. Conc. | Blind. Part. | Blind. Asses. |
|---------------------------------------|----------------------------------------------------------------------------------------------------------------------------------------------------------------------|----------------------------------------------------------------------------------------------------------------------------------------------------|-----------------------|-----------------|------------|--------------|--------------|---------------|
| Hunter (2015) [RCT] <sup>256</sup>    | <u>Diet + exercise vs diet, change BL-18 months</u><br>SMD -0.04 (-0.26, 0.19)<br><u>Diet + exercise vs exercise, change BL-18 months</u><br>SMD -0.13 (-0.35, 0.10) | <u>Cartilage volume, change bl-18 months, mean (SD †)</u><br>Diet -73.1 (479.6)<br>Exercise: -32.3 (451.9)<br>Diet + exercise: -89.9 (463.6)       | *                     |                 | L          | H/UC         | H/UC         | H/UC          |
| Henriksen (2014) [RCT] <sup>259</sup> | <u>Diet vs control, change BL-week 68</u><br>SMD -0.18 (-0.54, 0.17)<br><u>Exercise vs control, change BL-week 68</u><br>SMD 0.03 (-0.32, 0.37)                      | <u>Medial tibiofemoral cartilage loss, change BL-week 68, mean (SD ‡)</u><br>Diet: -0.13 (0.38)<br>Exercise: -0.05 (0.38)<br>Control: -0.06 (0.39) | *                     |                 | L          | L            | H/UC         | L             |

† SD calculated from standard error

‡ SD calculated from 95% CI

Alloc. Conc. = allocation concealment, AMSTAR2 = Assessing the Methodological Quality of Systematic Reviews, BL = baseline, Blind. Asses. = Blinded assessors, Blind. Part. = blinded participants, CI = confidence interval, H/UC = high / unclear risk of bias, L = low risk of bias, OA = osteoarthritis, Rand. Seq. = random sequence generation, SD = standard deviation, SMD = Standardised mean difference

## Supplementary table 107 – Cartilage loss outcomes from observational studies in OA

Table – Cartilage loss (OA), results and quality assessment of observational studies

| Study (date) [study type]                                 | Results                                                                                                                                                                                                                                                                                                                                                                                                                                                                                                                                                                                                                                                                                           | Weight associated with outcome | Study Pop. | Attr. | Prog. Meas. | Outc. Meas. | Conf. | Stats. |
|-----------------------------------------------------------|---------------------------------------------------------------------------------------------------------------------------------------------------------------------------------------------------------------------------------------------------------------------------------------------------------------------------------------------------------------------------------------------------------------------------------------------------------------------------------------------------------------------------------------------------------------------------------------------------------------------------------------------------------------------------------------------------|--------------------------------|------------|-------|-------------|-------------|-------|--------|
| Moyer (2017)<br>[Prospective cohort] <sup>283</sup>       | <u>Cartilage loss, cMFTC / cLFTC, reg coef (95% CI) per unit BMI</u><br>neutral (+/- 0–2 degrees): -1.6 (-4.8, 1.6) / 1.3 (-1.7, 4.3)<br>minor malalignment (+/- 2-3.5 deg): -7.7 (-13.2, -2.2) / -2.2 (-6.6, 2.3)<br>definite malalignment (+/- ≥3.5 deg): -4.6 (-10.9, 1.7) / 1.7 (-3.1, 6.5)                                                                                                                                                                                                                                                                                                                                                                                                   | *                              | L          | M     | L           | L           | L     | M      |
| Eckstein (2009)<br>[Prospective cohort] <sup>304</sup>    | [1] BMI <25, 2) BMI 25-30, 3) BMI 30-35, 4) BMI ≥35]<br><u>Medial tibia, bl-1 year mean change %</u><br>1) -0.46, 2) -0.22, 3) -1.00, 4) -0.08<br><u>Weight-bearing medial femoral condyle, bl-1 year mean change %</u><br>1) 0.10, 2) -1.38, 3) -3.28, 4) -1.56<br><u>Medial femoro-tibial compartment, bl-1 year mean change %</u><br>1) -0.17, 2) -0.81, 3) -2.14, 4) -0.84<br><u>Lateral tibia, bl-1 year mean change %</u><br>1) -0.43, 2) -0.38, 3) -0.97, 4) -0.96<br><u>Weight-bearing lateral femoral condyle, bl-1 year mean change %</u><br>1) -0.02, 2) 0.17, 3) -0.09, 4) 0.48<br><u>Lateral femoro-tibial compartment, bl-1 year mean change %</u><br>1) -0.23, -0.12, -0.53, -0.25 | *                              | L          | L     | L           | L           | M     | M      |
| Davies-Tuck (2008)<br>[Prospective cohort] <sup>307</sup> | <u>Multivariable regression (95%CI):</u><br>Medial tibiofemoral cartilage defect:<br>BMI : 0.005 (-0.02 to 0.03)<br>Lateral tibiofemoral cartilage defects:<br>BMI : 0.004 (-0.02 to 0.03)                                                                                                                                                                                                                                                                                                                                                                                                                                                                                                        | *                              | M          | L     | L           | L           | L     | M      |
| Pelletier (2007)<br>[Prospective cohort] <sup>308</sup>   | <u>medial central femur cartilage volume loss at 24 months, regression coefficient (SE)</u><br>BL BMI -0.19 (0.09) p=0.03 [adj]<br><u>medial central subregion cartilage volume loss at 24 months, regression coefficient (SE)</u><br>BL BMI -0.15 (0.09) p=0.09                                                                                                                                                                                                                                                                                                                                                                                                                                  | ✓                              | L          | L     | L           | L           | H     | H      |

Attr. = attrition, BL = baseline, BMI = body mass index, CI = confidence interval, Conf. = confounding, cLFTC = central weight-bearing lateral femorotibial compartment, cMFTC = central weight-bearing medial femorotibial compartment L = low risk of bias, M = moderate risk of bias, Outc. Meas = outcome measurement, Prog. Meas. = prognostic factor measurement, Pros = prospective, Rand. Seq. = random sequence generation, SD = standard deviation, SE = standard error, SMD = Standardised mean difference, Stats. = statistical analysis, Study Pop. = study population

Table – Cartilage loss (OA), results and quality assessment of observational studies

| Study (date) [study type]                               | Results                                                                                                                                                                                          | Weight associated with outcome | Study Pop. | Attr. | Prog. Meas. | Outc. Meas. | Conf. | Stats. |
|---------------------------------------------------------|--------------------------------------------------------------------------------------------------------------------------------------------------------------------------------------------------|--------------------------------|------------|-------|-------------|-------------|-------|--------|
| Raynauld (2006)<br>[Prospective cohort] <sup>310</sup>  | <u>Cartilage loss cluster, mean (SD) BL BMI</u><br>Slow cartilage loss: 29.6 (4.3)<br>Intermediate cartilage loss: 31.0 (4.3)<br>Fast cartilage loss: 32.6 (2.7) p=0.06                          | ✓                              | M          | L     | L           | L           | H     | H      |
| Wluka (2006)<br>[Prospective cohort] <sup>311</sup>     | <u>Cartilage volume over 4.5 years, regression coefficient (95% CI)</u><br>Medial cartilage: BMI = 1.1 (-2.3 to 4.6) [multivariable]<br>lateral cartilage: BMI = 0.2 (-3.4, 3.9) [multivariable] | ✘                              | L          | M     | L           | L           | L     | M      |
| Cicuttini (2002)<br>[Prospective cohort] <sup>313</sup> | <u>Cartilage lose (patella), regression coefficient (95% CI)</u><br>Unadjusted: -0.00645 per unit BMI (-0.002, 0.001)<br>Adjusted: -0.0019 per unit BMI (-0.004, 0.000)                          | ✓                              | L          | M     | L           | L           | L     | M      |
| Schouten (1992)<br>[Prospective cohort] <sup>319</sup>  | <u>Cartilage loss, OR (95% CI) [adj]</u><br>BMI<24.35: ref<br>24.35-25.96: 1.77 (0.48, 6.50)<br>25.97-27.73: 5.28 (1.54, 18.1)<br>>27.73: 11.1 (3.28, 37.3)                                      | ✓                              | L          | M     | L           | L           | M     | M      |

Attr. = attrition, BL = baseline, BMI = body mass index, CI = confidence interval, Conf. = confounding, L = low risk of bias, M = moderate risk of bias, OR = odds ratio, Outc. Meas = outcome measurement, Prog. Meas. = prognostic factor measurement, Pros = prospective, Rand. Seq. = random sequence generation, SD = standard deviation, Stats. = statistical analysis, Study Pop. = study population

## Supplementary table 108 – Bone marrow lesion outcomes from weight-loss interventions in OA

Table – Bone marrow lesions (OA), results and quality assessment

| Study (date) [study type]             | Standardised result, SMD (95% CI) unless otherwise stated                                                                                      | Natural result                                                                                                                          | Supports intervention | AMSTAR2 quality | Rand. Seq. | Alloc. Conc. | Blind. Part. | Blind. Asses. |
|---------------------------------------|------------------------------------------------------------------------------------------------------------------------------------------------|-----------------------------------------------------------------------------------------------------------------------------------------|-----------------------|-----------------|------------|--------------|--------------|---------------|
| Henriksen (2014) [RCT] <sup>259</sup> | <u>Diet vs control, change BL-week 68</u><br>SMD 0.24 (-0.11, 0.60)<br><u>Exercise vs control, change BL-week 68</u><br>SMD 0.32 (-0.03, 0.67) | <u>Medial tibiofemoral BML, change BL- week 68, mean (SD ‡)</u><br>Diet: -0.02 (0.49)<br>Exercise: 0.02 (0.51)<br>Control: -0.14 (0.50) | *                     |                 | L          | L            | H/UC         | L             |

‡ SD calculated from 95% CI

Alloc. Conc. = allocation concealment, AMSTAR2 = Assessing the Methodological Quality of Systematic Reviews, BL = baseline, Blind. Asses. = Blinded assessors, Blind. Part. = blinded participants, BML = bone marrow lesions, CI = confidence interval, H/UC = high / unclear risk of bias, L = low risk of bias, OA = osteoarthritis, Rand. Seq. = random sequence generation, SMD = Standardised mean difference

## Supplementary table 109 – Bone marrow lesion outcomes from observational studies in OA

Table – Bone marrow lesions (OA), results and quality assessment of observational studies

| Study (date) [study type]                             | Results                                                                                                                                                               | Weight associated with outcome | Study Pop. | Attr. | Prog. Meas. | Outc. Meas. | Conf. | Stats. |
|-------------------------------------------------------|-----------------------------------------------------------------------------------------------------------------------------------------------------------------------|--------------------------------|------------|-------|-------------|-------------|-------|--------|
| Gudbergson (2013) [Prospective cohort] <sup>291</sup> | <u>Bone marrow lesion response, OR (95% CI)</u><br>weight loss >10% vs <10%: 1.95 (0.70, 5.45) [unadjusted]<br>weight loss >10% vs <10%: 1.86 (0.66, 5.26) [adjusted] | *                              | L          | L     | L           | L           | L     | M      |

Attr. = attrition, CI = confidence interval, Conf. = confounding, L = low risk of bias, M = moderate risk of bias, OR = odds ratio, Outc. Meas = outcome measurement, Prog. Meas. = prognostic factor measurement, Pros = prospective, Rand. Seq. = random sequence generation, Stats. = statistical analysis, Study Pop. = study population

## Supplementary table 110 – CRP outcomes from weight-loss interventions in OA

Table – CRP (OA), results and quality assessment

| Study (date) [study type]                       | Standardised result, SMD (95% CI) unless otherwise stated    | Natural result                                                                                                      | Supports intervention | AMSTAR2 quality | Rand. Seq. | Alloc. Conc. | Blind. Part. | Blind. Asses. |
|-------------------------------------------------|--------------------------------------------------------------|---------------------------------------------------------------------------------------------------------------------|-----------------------|-----------------|------------|--------------|--------------|---------------|
| Miller (2008) [RCT] <sup>266</sup>              | <u>Diet vs control at 6 months</u><br>SMD 0.00 (-0.48, 0.48) | CRP, BL / 6 months, mean (SD †)<br>Diet 0.58 (0.50) / 0.62 (0.56)<br>Control: 0.72 (0.48) / 0.62 (0.90)             | ✘                     |                 | H/UC       | H/UC         | H/UC         | H/UC          |
| Bartels (2014) [Single arm int.] <sup>275</sup> |                                                              | CRP, mean change from BL-16 weeks, unadjusted mean (SD) / adjusted mean (95% CI)<br>-1.3 (5.7) / -1.3 (-2.1, -0.01) | ✓                     |                 |            |              |              |               |

† SD calculated from standard error

Alloc. Conc. = allocation concealment, AMSTAR2 = Assessing the Methodological Quality of Systematic Reviews, BL = baseline, Blind. Asses. = Blinded assessors, Blind. Part. = blinded participants, CI = confidence interval, CRP = C-reactive protein, H/UC = high / unclear risk of bias, L = low risk of bias, OA = osteoarthritis, Rand. Seq. = random sequence generation, RCT = randomised controlled trial, SD = standard deviation, SMD = Standardised mean difference

## Supplementary table 111 – CRP outcomes from observational studies in OA

Table – CRP (OA), results and quality assessment of observational studies

| Study (date) [study type]                          | Results                                                                                                                                     | Weight associated with outcome | Study Pop. | Attr. | Prog. Meas. | Outc. Meas. | Conf. | Stats. |
|----------------------------------------------------|---------------------------------------------------------------------------------------------------------------------------------------------|--------------------------------|------------|-------|-------------|-------------|-------|--------|
| Beavers (2015) [Prospective cohort] <sup>286</sup> | <u>CRP (logged, 18 mth change), regression coefficient (95% CI)</u><br>BMI: 0.15 (0.11, 0.19)<br>[Adjusted – including randomisation group] | ✓                              | L          | M     | L           | L           | L     | L      |

Attr. = attrition, BMI = body mass index, CI = confidence interval, Conf. = confounding, L = low risk of bias, M = moderate risk of bias, Outc. Meas = outcome measurement, Prog. Meas. = prognostic factor measurement, Pros = prospective, Rand. Seq. = random sequence generation, Stats. = statistical analysis, Study Pop. = study population

## Supplementary table 112 – Response criteria outcomes from weight-loss interventions in OA

Table – Response criteria (OA), results and quality assessment

| Study (date) [study type]          | Standardised result, SMD (95% CI) unless otherwise stated | Natural result                                                                                          | Supports intervention | AMSTAR2 quality | Rand. Seq. | Alloc. Conc. | Blind. Part. | Blind. Asses. |
|------------------------------------|-----------------------------------------------------------|---------------------------------------------------------------------------------------------------------|-----------------------|-----------------|------------|--------------|--------------|---------------|
| Riecke (2010) [RCT] <sup>264</sup> |                                                           | <u>OMERACT-OASRI response, n(%)</u><br>Low calories: 63 (65.6%)<br>Very low calories 59 (61.5%); p=0.55 | *                     |                 | L          | L            | H/UC         | L             |

Alloc. Conc. = allocation concealment, AMSTAR2 = Assessing the Methodological Quality of Systematic Reviews, Blind. Asses. = Blinded assessors, Blind. Part. = blinded participants, CI = confidence interval, H/UC = high / unclear risk of bias, L = low risk of bias, OA = osteoarthritis, OASRI = Osteoarthritis Research Society International, OMERACT = Outcome measures in Rheumatology, Rand. Seq. = random sequence generation, RCT = randomised controlled trial

## Supplementary table 113 – Response criteria outcomes from observational studies in OA

Table – Response criteria (OA), results and quality assessment of observational studies

| Study (date) [study type]                            | Results                                                                                                                                                                                 | Weight associated with outcome | Study Pop. | Attr. | Prog. Meas. | Outc. Meas. | Conf. | Stats. |
|------------------------------------------------------|-----------------------------------------------------------------------------------------------------------------------------------------------------------------------------------------|--------------------------------|------------|-------|-------------|-------------|-------|--------|
| Pelletier (2018) [Prospective cohort] <sup>281</sup> | <u>WOMAC responders, mean (SD) BMI</u><br>Responders: 32.09 (6.04)<br>Non-responders: 30.06 (6.50) p=0.163                                                                              | *                              | L          | L     | L           | L           | H     | H      |
| Eymard (2017) [Prospective cohort] <sup>282</sup>    | <u>OMERACT-OASRI response, OR (95% CI)</u><br>BMI: 0.89 (0.82, 0.95)<br>obesity (y/n): 0.23 (0.10, 0.51)                                                                                | ✓                              | L          | M     | L           | L           | L     | M      |
| Bingham (2011) [Prospective cohort] <sup>298</sup>   | <u>Responders, yes / no, mean (SD) BMI</u><br>Placebo: 31.7 (7.5) / 33.4 (7.3); p=0.164<br>Etoricoxib: 32.5 (7.0) / 33.3 (7.5); p=0.285<br>Celecoxib: 32.0 (7.3) / 32.3 (6.3) ; p=0.768 | *                              | L          | M     | L           | L           | H     | H      |

Attr. = attrition, BMI = body mass index, CI = confidence interval, Conf. = confounding, H = high risk of bias, L = low risk of bias, M = moderate risk of bias, OA = osteoarthritis, OASRI = Osteoarthritis Research Society International, OMERACT = Outcome measures in Rheumatology, OR = odds ratio, Outc. Meas = outcome measurement, Prog. Meas. = prognostic factor measurement, Pros = prospective, Rand. Seq. = random sequence generation, SD = standard deviation, Stats. = statistical analysis, Study Pop. = study population, WOMAC = Western Ontario and McMaster Universities Osteoarthritis Index



## Supplementary table 114 – Walk-test outcomes from weight-loss interventions in OA

Table – Walk-test (OA), results and quality assessment

| Study (date) [study type]                          | Standardised result, SMD (95% CI) unless otherwise stated                                                                                         | Natural result                                                                                                                                                  | Supports intervention | AMSTAR2 quality | Rand. Seq. | Alloc. Conc. | Blind. Part. | Blind. Asses. |
|----------------------------------------------------|---------------------------------------------------------------------------------------------------------------------------------------------------|-----------------------------------------------------------------------------------------------------------------------------------------------------------------|-----------------------|-----------------|------------|--------------|--------------|---------------|
| Christensen (2015) [RCT] <sup>255</sup>            | <u>Diet vs control, change BL-68 weeks</u><br>SMD 0.24 (-0.11, 0.59)<br><u>Exercise vs control, change BL-68 weeks</u><br>SMD 0.26 (-0.09, 0.61)  | <u>6MWT, change BL-68 weeks, mean (SD ‡)</u><br>Diet: 37.519 (60.3)<br>Exercise: 38.478 (60.3)<br>Control: 22.89 (60.2)                                         | ✘                     |                 | L          | L            | H/UC         | L             |
| Messier (2013) [RCT] <sup>26</sup>                 | <u>Diet + exercise vs diet at 18 months</u><br>SMD 0.37 (0.14, 0.60)<br><u>Diet + exercise vs exercise at 18 months</u><br>SMD 0.12 (-0.10, 0.35) | <u>6MWT (m), BL / 18 months, mean (SD ‡)</u><br>Diet: 475 (81.8) / 502 (84.9)<br>Exercise: 480 (90.6) / 525 (90.6)<br>Diet + exercise: 467 (88.1) / 537 (103.8) | ✓                     |                 | L          | H/UC         | H/UC         | L             |
| Miller (2006) [RCT] <sup>267</sup>                 | <u>Diet vs control at 6 months</u><br>SMD 0.48 (0.05, 0.90)                                                                                       | <u>6MWT (m), BL / 6 months, mean (SD †)</u><br>Diet: 436.5 (86.2) / 510.0 (99.5)<br>Control: 447.8 (97.7) / 459.0 (114.1)                                       | ✓                     |                 | H/UC       | H/UC         | H/UC         | H/UC          |
| Messier (2000) [RCT] <sup>269</sup>                | <u>Exercise + diet vs exercise</u><br>SMD 0.78 (-0.06, 1.61)                                                                                      | <u>6MWT (distance in feet), mean (SD †) at 6 months</u><br>Exercise: 1718 (136.0)<br>Exercise + diet: 1821 (129.8)                                              | ✘                     |                 | H/UC       | H/UC         | H/UC         | L             |
| Bespoke meta-analysis including <sup>255,267</sup> | <u>Weight loss intervention vs control</u><br>SMD 0.31 (0.09, 0.52), I <sup>2</sup> 0%                                                            |                                                                                                                                                                 | ✓                     |                 |            |              |              |               |
| Paans (2013) [Single arm int.] <sup>276</sup>      |                                                                                                                                                   | <u>6MWT BL / 8 months, mean (SD †)</u><br>433.3 (73.9) / 481.4 (59.7)                                                                                           | ✓                     |                 |            |              |              |               |

† SD calculated from standard error

‡ SD calculated from 95% CI

6MWT = six minute walk test, Alloc. Conc. = allocation concealment, AMSTAR2 = Assessing the Methodological Quality of Systematic Reviews, BL = baseline, Blind. Asses. = Blinded assessors, Blind. Part. = blinded participants, CI = confidence interval, H/UC = high / unclear risk of bias, L = low risk of bias, m = metres, OA = osteoarthritis, Rand. Seq. = random sequence generation, RCT = randomised controlled trial, SD = standard deviation, SMD = Standardised mean difference

## Supplementary table 115 – Mortality outcomes from observational studies in OA

Table – Death (OA), results and quality assessment of observational studies

| Study (date) [study type]                          | Results                                                                                                                                  | Weight associated with outcome | Study Pop. | Attr. | Prog. Meas. | Outc. Meas. | Conf. | Stats. |
|----------------------------------------------------|------------------------------------------------------------------------------------------------------------------------------------------|--------------------------------|------------|-------|-------------|-------------|-------|--------|
| Shea (2010)<br>[Prospective cohort] <sup>303</sup> | <u>Death, Cox Regression analysis (mean weight loss-1.4 vs -4.8kg):</u><br>WL vs NWL : HR 0.5 (0.3, 0.9)<br>Adjusted HR : 0.5 (0.3, 1.0) | ✓                              | L          | L     | L           | L           | M     | M      |

Attr. = attrition, CI = confidence interval, Conf. = confounding, HR = hazard ratio, kg = kilograms, L = low risk of bias, M = moderate risk of bias, NWL = no weight loss, Outc. Meas = outcome measurement, Prog. Meas. = prognostic factor measurement, Pros = prospective, Rand. Seq. = random sequence generation, Stats. = statistical analysis, Study Pop. = study population, VAS = visual analogue scale, WL = weight loss

## Supplementary table 116 – Description of studies of assessing weight and outcomes in RA

Table – Rheumatoid arthritis, description of reviews

| Authors (date)                 | Review type | Study type included         | Exposure detail                                                                          | Number of studies included | Funders                                                     |
|--------------------------------|-------------|-----------------------------|------------------------------------------------------------------------------------------|----------------------------|-------------------------------------------------------------|
| Liu (2017) <sup>322</sup>      | MA          | Observational studies, RCTs | Studies investigating the association between obesity and outcomes in RA                 | 16                         | <b>Government</b> (Canadian Institutes for Health Research) |
| Lupoli (2016) <sup>323</sup>   | MA          | Observational studies       | Studies investigating the association between obesity and minimal disease activity in RA | 17                         | <b>Government</b> (Italian Ministry of Health)              |
| Baghdadi (2015) <sup>324</sup> | MA          | Observational studies       | Studies investigating the association between obesity and cardiovascular morbidity in RA | 10                         | <b>No funding</b>                                           |

MA = meta-analysis, RA = rheumatoid arthritis, RCT = randomised controlled trial

Table – Rheumatoid arthritis, description of included studies

| Author (date) [country]                            | Study design | Inclusion criteria                                                                                     | Exposure detail                                                                          | N                                         | Age, mean (SD) years                                         | N (%) female                                      | Funders                                                                                                                                                                                                            |
|----------------------------------------------------|--------------|--------------------------------------------------------------------------------------------------------|------------------------------------------------------------------------------------------|-------------------------------------------|--------------------------------------------------------------|---------------------------------------------------|--------------------------------------------------------------------------------------------------------------------------------------------------------------------------------------------------------------------|
| Baker (2019) [USA] <sup>325</sup>                  | Pros. Cohort | National Data Bank for Rheumatic Diseases, aged >40 years.<br>Exclusions: BMI<14                       | BMI at age 30 and at enrolment:<br><18.5<br>18.5-25<br>25-30<br>>30                      | 12268                                     | 59.9 (10.5)                                                  | 80%                                               | <b>Government</b> (Veterans Affairs)                                                                                                                                                                               |
| Hirose (2019) [Japan] <sup>326</sup>               | Pros. Cohort | 2010 ACR/EULAR RA criteria, aged >20 years                                                             | BMI <18                                                                                  | 388                                       | With MAC-PD:<br>71.4 (6.3)<br>without MAC-PD:<br>64.3 (13.2) | With MAC-PD:<br>78.6%<br>Without MAC-PAD: 80.8% F | <b>No funding</b>                                                                                                                                                                                                  |
| Lechtenboehmer (2019) [Switzerland] <sup>327</sup> | Pros. Cohort | Swiss Clinical Quality Management in Rheumatic Diseases (SCQM) registry – patients had two radiographs | BMI – continuous                                                                         | Progression : 680<br>No progression : 519 | Progression:<br>59.4 (9.8)<br>No progression:<br>60.5 (10.5) | Progression:<br>79%<br>No progression:<br>75%     | <b>Industry</b> (Abbvie, Celgene, iQone, Lilly, MSD, Novartis, Pfizer, Roche, Samsung Bioepis, Sandoz, Sanofi, UCB)                                                                                                |
| England (2018) [USA] <sup>328</sup>                | Pros. Cohort | Veterans Affairs cohort – 1987 ACR RA criteria, aged >18 years, US veterans                            | BMI categories:<br>Underweight: <20<br>Normal: 20-25<br>Overweight: >25-30<br>Obese: >30 | 1600                                      | 63.4 (11.0)                                                  | 8.8%                                              | <b>Government</b> (Veterans Affairs, NIH)                                                                                                                                                                          |
| Nikiphorou (2018) [UK] <sup>329</sup>              | Pros. Cohort | ERAN / ERAS studies                                                                                    | BMI categories:<br>Underweight: <18.5<br>Normal / overweight: 18.5-29.99<br>Obese: ≥30   | 2701                                      | 56 (14)                                                      | 1812 (67)                                         | <b>Charity</b> (Arthritis Research Campaign),<br><b>Industry</b> (BUPA),<br><b>Government</b> (NIHR)                                                                                                               |
| Rydell (2018) [Sweden] <sup>330</sup>              | Pros. Cohort | 1987 ACR RA criteria, symptom duration ≤12 months                                                      | BMI categories:<br>Normal: 18.5-24.99<br>Overweight: 25-39.99<br>Obese: ≥30              | 162                                       | Median (IQR)<br>62 (52-70)                                   | 114 (70.4)                                        | <b>University</b> (Lund),<br><b>Professional body</b> (Swedish Rheumatism Association),<br><b>Government</b> (Swedish Research Council),<br><b>Charity</b> (Foundation for Assistance to Disabled People in Skåne) |

ACR = American College of Rheumatology, BMI = body mass index, EULAR = European League Against Rheumatism, IQR = interquartile range, MAC-PD = mycobacterium avium complex pulmonary disease, N = number, NIH = National Institutes of Health, NIHR = National Institute for Health Research, pros. = prospective, SD = standard deviation, UK = United Kingdom, United States of America

Table – Rheumatoid arthritis, description of included studies

| Author (date) [country]                      | Study design | Inclusion criteria                                                                       | Exposure detail                                                                                                                                                                                              | N                                             | Age, mean (SD) years                                                                                                                                                                   | N (%) female                                                    | Funders                                                                                                                                                                     |
|----------------------------------------------|--------------|------------------------------------------------------------------------------------------|--------------------------------------------------------------------------------------------------------------------------------------------------------------------------------------------------------------|-----------------------------------------------|----------------------------------------------------------------------------------------------------------------------------------------------------------------------------------------|-----------------------------------------------------------------|-----------------------------------------------------------------------------------------------------------------------------------------------------------------------------|
| Schulman (2018) [Canada] <sup>331</sup>      | Pros. Cohort | CATCH cohort - Fulfilment 1987 or 2010 criteria for RA, aged ≥18 years, early IA         | BMI categories:<br>Healthy: 18.5-24.9<br>Overweight: 25-29.9<br>Obese: >30                                                                                                                                   | Healthy: 315<br>Overweight: 343<br>Obese: 324 | Healthy: 50 (17)<br>Overweight: 55 (15)<br>Obese: 54 (13)                                                                                                                              | Healthy: 260 (83%)<br>Overweight: 214 (63%)<br>Obese: 235 (73%) | <b>Industry</b> (Amgen and Pfizer Canada, Hoffmann-LaRoche, UCB Canada, Bristol-Myers Squibb Canada, AbbVie, Janssen Biotech, Medexus, Eli Lilly Canada, and Sanofi Canada) |
| Smolen (2018) [Multinational] <sup>332</sup> | Pros. Cohort | Reanalysis of PRESERVE trial – Active RA with moderate disease activity (DAS28: 3.2-5.1) | BMI categories:<br><18.5<br>18.5-25<br>25-30<br>>30                                                                                                                                                          | 834                                           | 48.4 (11.9)                                                                                                                                                                            | 694 (83.2)                                                      | <b>Industry</b> (Pfizer)                                                                                                                                                    |
| Sparks (2018) [USA] <sup>333</sup>           | Pros. Cohort | 1987 ACR RA criteria                                                                     | Weight change – before and after RA diagnosis<br>Stable: <10pounds;<br>Mild loss change weight <-10 to -20 pounds<br>Moderate loss <-20 to -30 pounds<br>Severe loss <-30 pounds.<br>For weight gain reverse | 902                                           | Severe Loss: 62.0 (8.9)<br>Moderate loss: 59.3 (12.9)<br>Mild loss: 58.1 (9.1)<br>stable: 55.8 (9.8)<br>Mild gain: 53.4 (9.4)<br>Moderate gain: 52.3 (8.3)<br>Severe gain: 50.0 (6.8)" | 100%                                                            | <b>Charity</b> (Rheumatology Research Foundation), <b>Government</b> (NIH)                                                                                                  |

ACR = American College of Rheumatology, BMI = body mass index, DAS28 = Disease activity score 28, N = number, NIH = National Institutes of Health, pros. = prospective, SD = standard deviation, United States of America

Table – Rheumatoid arthritis, description of included studies

| Author (date) [country]                              | Study design | Inclusion criteria                                                                                                                                                                                                                                                      | Exposure detail                                                               | N    | Age, mean (SD) years                                                                                                                  | N (%) female                                                                                                                                       | Funders                                                                                       |
|------------------------------------------------------|--------------|-------------------------------------------------------------------------------------------------------------------------------------------------------------------------------------------------------------------------------------------------------------------------|-------------------------------------------------------------------------------|------|---------------------------------------------------------------------------------------------------------------------------------------|----------------------------------------------------------------------------------------------------------------------------------------------------|-----------------------------------------------------------------------------------------------|
| van der Heijde (2018) [Multinational] <sup>334</sup> | Pros. Cohort | Reanalysis of RA-BEGIN trial – aged ≥18 years, active RA, no / limited treatment with conventional DMARDs and no biologic DMARDs randomised to either methotrexate, baricitinib or methotrexate + baricitinib<br>Group A = sustained DAS28 ≤3.2<br>Group B = DAS28 >3.2 | BMI – continuous                                                              | 545  | Group A:<br>MTX: 52 (14)<br>bari: 52 (13)<br>bari + MTX: 46 (14)<br>Group B:<br>MTX: 50 (13)<br>bari: 50 (13)<br>bari + MTX: 51 (13)" | Group A:<br>MTX: 31 (68.9)<br>bari: 49 (73.1)<br>bari + MTX: 71 (71.0)<br>Group B:<br>MTX: 117 (70.9)<br>bari: 72 (78.3)<br>bari + MTX: 85 (73.9)" | <b>RCT funded by Eli Lilly</b>                                                                |
| Bird (2017) [Australia] <sup>335</sup>               | Pros. Cohort | PREDICT study – symptom duration <12 months, aged >18 years                                                                                                                                                                                                             | Weight in kilograms                                                           | 1017 | 60.4 (14.7)                                                                                                                           | 708 (69.6)                                                                                                                                         | <b>Industry</b> (Roche)                                                                       |
| D'Agostino (2017) [Multinational] <sup>336</sup>     | Pros. Cohort | Reanalysis of ACQUIRE RCT (abatacept) – active RA, inadequate response to methotrexate                                                                                                                                                                                  | BMI categories:<br>Underweight/normal: <25<br>Overweight: 25-30<br>Obese: ≥30 | 1456 | Underweight / normal: 57.5 (14.4)<br>Overweight: 51.3 (12.2)<br>Obese: 51.6 (11.2)                                                    | Underweight/normal: 83.1%<br>Overweight: 78.9%<br>Obese: 85.7%                                                                                     | <b>Industry</b> (Bristol Myers Squibb)                                                        |
| George (2017) [USA] <sup>337</sup>                   | Pros. Cohort | Reanalysis of RCT – those who had MRIs scores, aged ≥18 years, 1987 ACR RA                                                                                                                                                                                              | BMI – dichotomised as obese (≥30) or not                                      | 470  | BMI <20: 44 (14)<br>20-25: 47 (12)<br>25-30: 51 (11)<br>≥30: 52 (11)                                                                  | BMI <20: 43 (84%)<br>20-25: 136 (83%)<br>25-30: 126 (83%)<br>≥30: 87 (84%)                                                                         | <b>Charity</b> (Rheumatology Research Foundation), <b>Government</b> (Veterans Affairs, NIHR) |

ACR = American College of Rheumatology, BMI = body mass index, DAS28 = Disease activity score 28, DMARD = disease modifying anti-rheumatic drug, MRI = magnetic resonance imaging, N = number, NIHR = National Institute for Health Research, pros. = prospective, SD = standard deviation, United States of America

Table – Rheumatoid arthritis, description of included studies

| Author (date) [country]                       | Study design | Inclusion criteria                                                                                                                                                    | Exposure detail                                                                                        | N                                                                                   | Age, mean (SD) years                                                                                               | N (%) female                                                                                                | Funders                                                                                                                     |
|-----------------------------------------------|--------------|-----------------------------------------------------------------------------------------------------------------------------------------------------------------------|--------------------------------------------------------------------------------------------------------|-------------------------------------------------------------------------------------|--------------------------------------------------------------------------------------------------------------------|-------------------------------------------------------------------------------------------------------------|-----------------------------------------------------------------------------------------------------------------------------|
| Iannone (2017) [Multinational] <sup>338</sup> | Pros. Cohort | PANABA collaboration - 10 national registers: Czech Republic, Denmark, France, Italy, Norway, Portugal, Spain, Sweden, Switzerland and Canada<br>All taking abatacept | BMI categories:<br>Underweight/normal: <25<br>Overweight: 25-30<br>Obese: 30-35<br>Severely obese: ≥35 | Under / normal weight: 1014<br>Overweight: 621<br>Obese: 267<br>severely obese: 113 | Under / normal weight: 55.4 (14.1)<br>Overweight: 57.9 (12.6)<br>Obese: 58.4 (11.0)<br>Severely obese: 54.5 (10.8) | Under/normal weight: 877 (86.5)<br>Overweight: 442 (71.2)<br>Obese: 213 (79.8)<br>Severely obese: 96 (85.0) | <b>Industry</b> (Bristol Myers Squibb)                                                                                      |
| Joo (2017) [S. Korea] <sup>339</sup>          | Pros. Cohort | Hanyang Bae RA cohort, >19 years, 1987 RA, symptom duration <2 years                                                                                                  | BMI – continuous                                                                                       | 374                                                                                 | 48.7 (12.0)                                                                                                        | 84.2%                                                                                                       | <b>Government</b> (Ministry for Health & Welfare)                                                                           |
| Levitsky (2017) [Sweden] <sup>340</sup>       | Pros. Cohort | SWEFOT RCT reanalysis (Methotrexate vs triple therapy)                                                                                                                | BMI categories:<br>Normal: <25<br>Overweight: 25-29.9<br>Obese: >30                                    | 154                                                                                 | Median (IQR)<br>56 (44-63)                                                                                         | 111 (72.1)                                                                                                  | <b>SWEFOT trial funded by</b> (Swedish Rheumatism Association, Stockholm County, and Schering-Plough/Merck Sharp and Dohme) |
| Mariette (2017) [Canada] <sup>341</sup>       | Pros. Cohort | ACTION study – starting abatacept, biologic naïve, aged ≥18 years, 1987 ACR RA criteria                                                                               | BMI categories:<br>Underweight / Normal: <25<br>Overweight: 25-29.9<br>Obese: >30                      | 672                                                                                 | Mean (95% CI)<br>Under / Normal: 58.2 (56.5, 59.8)<br>Overweight: 61.8 (60.0, 63.4)<br>Obese: 60.3 (58.6, 62.0)    | Under / normal: 74.2%<br>Overweight: 66.1%<br>Obese: 60.3%"                                                 | <b>Industry</b> (Bristol Myers Squibb)                                                                                      |
| Miwa (2017) [Japan] <sup>342</sup>            | Pros. Cohort | RA patients treated with non-TNFi biologics                                                                                                                           | BMI – continuous                                                                                       | 97                                                                                  | Remission at FU: 59 (50, 68)<br>No remission: 70 (62, 74)<br>§                                                     | Remission: 83%<br>No remission: 80%                                                                         | <b>Industry</b> (Astellas Pharma, Mitsubishi Tanabe Pharma, AbbVie, Pfizer Japan, Chugai Pharmaceutical)                    |

ACR = American College of Rheumatology, BMI = body mass index, FU = follow-up IQR = interquartile range, N = number, pros. = prospective, RCT = randomised controlled trial, SD = standard deviation, TNF = tumour necrosis factor inhibitor

Table – Rheumatoid arthritis, description of included studies

| Author (date) [country]                     | Study design | Inclusion criteria                                                                                                                                                                                                        | Exposure detail                        | N                               | Age, mean (SD) years                                                   | N (%) female                                                     | Funders                                                                                                                                                              |
|---------------------------------------------|--------------|---------------------------------------------------------------------------------------------------------------------------------------------------------------------------------------------------------------------------|----------------------------------------|---------------------------------|------------------------------------------------------------------------|------------------------------------------------------------------|----------------------------------------------------------------------------------------------------------------------------------------------------------------------|
| Ramirez (2017) [Spain] <sup>343</sup>       | Pros. Cohort | RA in clinical remission (DAS28<2.6) for >6 months                                                                                                                                                                        | BMI – continuous                       | 42                              | Median (IQR)<br>54.5 (45.0, 61.0)                                      | 32 (76.2)                                                        | <b>Government</b> (Spain and Ministeriode Economía y Competitividad)                                                                                                 |
| Feldthusen (2016) [Sweden] <sup>344</sup>   | Pros. Cohort | ICD 10 code for RA, aged 20-65 years, symptom duration >3 years, stable medication >3 months<br>Exclusions: Other severe somatic or psychiatric diseases or not having the capacity to communicate effectively in Swedish | BMI – continuous                       | 65                              | 53.7 (9.9)                                                             | 48 (73.8)                                                        | <b>University</b> (Gothenburg Centre for Person-Centred Care),<br><b>Government</b> (Swedish Research Council),<br><b>Hospital</b> (Sahlgrenska University Hospital) |
| Gardette (2016) [France] <sup>345</sup>     | Pros. Cohort | 2010 ACR/EULAR RA criteria, active RA, all treated with abatacept                                                                                                                                                         | BMI – continuous                       | 141                             | BMI <25: 54.0 (14.6)<br>BMI 25-30: 54.6 (13.2)<br>BMI >30: 53.5 (10.5) | BMI <25: 54 (84.3)<br>BMI 25-30: 32 (84.2)<br>BMI >30: 30 (77.0) | <b>Not reported</b> – authors declared no conflict of interest                                                                                                       |
| Gardette (2016) [France] <sup>346</sup>     | Pros. Cohort | 2010 ACR/EULAR RA criteria, active RA, all treated with tocilizumab                                                                                                                                                       | BMI – continuous                       | 115                             | BMI <25: 53.0 (12.5)<br>BMI 25-30: 52.9 (8.6)<br>BMI >30: 51.6 (12.7)  | BMI <25: 45 (84.9)<br>BMI 25-30: 30 (81.1)<br>BMI >30: 22 (88.0) | <b>Not reported</b> – authors declared no conflict of interest                                                                                                       |
| McWilliams (2016) [UK] <sup>347</sup>       | Pros. Cohort | BSRBR-RA study – first time biologic users or non-biologic cohort, 1987 ACR RA                                                                                                                                            | BMI categories:<br><25<br>25-30<br>≥30 | TNFi – 11995<br>Non-TNFi – 3632 | TNFi – 56 (12)<br>Non-TNFi – 60 (12)                                   | TNFi – 76%<br>Non-TNFi – 73%                                     | <b>Industry</b> (Pfizer)                                                                                                                                             |
| Tantayakom (2016) [Thailand] <sup>348</sup> | Pros. Cohort | RA according to 2010 ACR/EULAR criteria<br>Exclusions: diagnosed with another rheumatic or autoimmune condition                                                                                                           | BMI – continuous                       | 267                             | 59 (11.1)                                                              | 236 (88.4)                                                       | <b>University</b> (Mahidol University)                                                                                                                               |

ACR = American College of Rheumatology, BMI = body mass index, BSRBR = British Society for Rheumatology Biologics Register, DAS28 = Disease activity score 28, EULAR = European League Against Rheumatism, ICD = International Classification of Diseases, IQR = interquartile range, N = number, pros. = prospective, SD = standard deviation, TNF = tumour necrosis factor inhibitor



Table – Rheumatoid arthritis, description of included studies

| Author (date) [country]               | Study design | Inclusion criteria                                                                                                                                              | Exposure detail                                                                                                           | N    | Age, mean (SD) years                                               | N (%) female                                                             | Funders                                                                                                                                                                                                                                              |
|---------------------------------------|--------------|-----------------------------------------------------------------------------------------------------------------------------------------------------------------|---------------------------------------------------------------------------------------------------------------------------|------|--------------------------------------------------------------------|--------------------------------------------------------------------------|------------------------------------------------------------------------------------------------------------------------------------------------------------------------------------------------------------------------------------------------------|
| Baker (2015) [USA] <sup>349</sup>     | Pros. Cohort | Veterans Affairs cohort – 1987 ACR RA, aged >18 years                                                                                                           | BMI categories:<br><20<br>20-25<br>>25,30,<br>>30<br>Rate of change of BMI:<br><2 per year<br>2-3 per year<br>>3 per year | 1674 | 63.5 (11.1)                                                        | 9%                                                                       | <b>Government</b> (Veterans affairs, NIH), <b>Charity</b> (Rheumatology Research Foundation)                                                                                                                                                         |
| Iannone (2015) [Italy] <sup>350</sup> | Pros. Cohort | 1987 ACR RA criteria, active disease about to start a biologic (adalimumab, certolizumab, etanercept, golimumab, infliximab, abatacept, tocilizumab, rituximab) | BMI categories:<br>Normal: <25<br>Overweight: 25-30<br>Obese: >30                                                         | 292  | Normal:<br>53.5 (20)<br>Overweight:<br>61 (14)<br>Obese: 60.5 (14) | Normal:<br>105 (89.7)<br>Overweight:<br>89 (81.6)<br>Obese:<br>55 (83.3) | <b>No funding</b>                                                                                                                                                                                                                                    |
| Pers (2015) [France] <sup>351</sup>   | Pros. Cohort | Tocilizumab for RA, 2010 ACR/EULAR RA criteria                                                                                                                  | BMI categories:<br>Normal: <25<br>Overweight: 25-30<br>Obese: >30                                                         | 222  | Median (IQR)<br>56 (47, 66)                                        | 82.4%                                                                    | <b>No reported</b>                                                                                                                                                                                                                                   |
| Kim (2014) [S.Korea] <sup>352</sup>   | Pros. Cohort | starting anti-TNF, 1987 ACR RA criteria                                                                                                                         | BMI categories:<br>BMI <22                                                                                                | 222  | 51.9 (12.6)                                                        | 192 (86.5)                                                               | <b>Not reported</b> – authors declared no conflicts of interest                                                                                                                                                                                      |
| Ochi (2014) [Japan] <sup>353</sup>    | Pros. Cohort | IORRA study – RA diagnosis                                                                                                                                      | BMI - continuous                                                                                                          | 9987 | w/ fracture:<br>61.5 (11.1)<br>no fracture:<br>55.7 (13.5)         | w/ fracture:<br>93.2%<br>no fracture:<br>81.9%                           | <b>Industry</b> (34 pharmaceutical companies), <b>Government</b> (Japan Society for the Promotion of Science), <b>Charity</b> (Nakatomi Foundation, Orthopaedics and Traumatology Foundation), <b>Professional body</b> (Japan Osteoporosis Society) |

ACR = American College of Rheumatology, BMI = body mass index, EULAR = European League Against Rheumatism, IORRA = Institute of Rheumatology Rheumatoid Arthritis, IQR = interquartile range, N = number, pros. = prospective, Retro. = retrospective, SD = standard deviation, TNF = tumour necrosis factor inhibitor, United States of America

Table – Rheumatoid arthritis, description of included studies

| Author (date) [country]                        | Study design | Inclusion criteria                                                                            | Exposure detail                                                       | N                                           | Age, mean (SD) years                                     | N (%) female | Funders                                                                                                                                                                                                                                                                       |
|------------------------------------------------|--------------|-----------------------------------------------------------------------------------------------|-----------------------------------------------------------------------|---------------------------------------------|----------------------------------------------------------|--------------|-------------------------------------------------------------------------------------------------------------------------------------------------------------------------------------------------------------------------------------------------------------------------------|
| Sandberg (2014) [Sweden] <sup>354</sup>        | Pros. Cohort | EIRA study                                                                                    | BMI categories:<br>Normal <25<br>Overweight: 25-30<br>Obese: ≥30      | 495                                         | <40 years: 17%<br>40-50: 15%<br>50-60: 27%<br>60-70: 41% | 353 (71.3)   | <b>Government</b> (Swedish Medical Research Council, Swedish Research Council for Health, Vinnova Working Life and Welfare), <b>Charity</b> (AFA foundation, King Gustaf V's 80-year foundation, the Swedish Rheumatic Foundation, Swedish Foundation for Strategic Research) |
| Ajeganova (2013) [Sweden] <sup>355</sup>       | Pros. Cohort | BARFOT study – 1987 ACR RA, symptom duration ≤12 months                                       | BMI categories:<br>1) ≤20<br>2) >20 to <25<br>3) ≥25 to <30<br>4) ≥30 | 1596<br>1) 89<br>2) 775<br>3) 526<br>4) 206 | 55.6 (14.6)                                              | 67.8%        | <b>Professional body</b> (Swedish Rheumatism Association), <b>Charity</b> (King Gustaf V's 80-Year Fund), <b>Government</b> (Stockholm County Council)                                                                                                                        |
| Gremese (2013) [Italy] <sup>356</sup>          | Pros. Cohort | GISEA study – active disease despite methotrexate treatment, 1987 ACR criteria, starting TNFi | BMI – continuous and categories:<br>BMI <20<br>BMI 20-30<br>BMI >30   | 641                                         | 52.1 (13.5)                                              | 521 (81.3)   | <b>Industry</b> (CD-Pharma)                                                                                                                                                                                                                                                   |
| Kanecki (2013) [Poland] <sup>357</sup>         | Pros. Cohort | RA patients                                                                                   | BMI - continuous                                                      | 51                                          | 62.5 (12.6)                                              | 42 (82.4)    | <b>Not reported</b> – authors declared no conflict of interest                                                                                                                                                                                                                |
| Dirven (2012) [The Netherlands] <sup>358</sup> | Pros. Cohort | Diagnosis of RA                                                                               | BMI - continuous                                                      | 783                                         | 61 (13)                                                  | 545 (32.2)   | <b>Not reported</b>                                                                                                                                                                                                                                                           |

ACR = American College of Rheumatology, BARFOT = Better Anti-Rheumatic Pharmacotherapy, BMI = body mass index, GISEA = Gruppo Italiano di Studio sulle Early Arthritis, N = number, pros. = prospective, SD = standard deviation, TNF = tumour necrosis factor inhibitor

Table – Rheumatoid arthritis, description of included studies

| Author (date) [country]                                | Study design | Inclusion criteria                                                                                                                                                                                                                                                                                                                                                                                                                                                                                                                                                                                                                                                                                                                                                                                                                                                                                                                                                                                            | Exposure detail                                                                                   | N     | Age, mean (SD) years         | N (%) female                  | Funders                                                                                                                         |
|--------------------------------------------------------|--------------|---------------------------------------------------------------------------------------------------------------------------------------------------------------------------------------------------------------------------------------------------------------------------------------------------------------------------------------------------------------------------------------------------------------------------------------------------------------------------------------------------------------------------------------------------------------------------------------------------------------------------------------------------------------------------------------------------------------------------------------------------------------------------------------------------------------------------------------------------------------------------------------------------------------------------------------------------------------------------------------------------------------|---------------------------------------------------------------------------------------------------|-------|------------------------------|-------------------------------|---------------------------------------------------------------------------------------------------------------------------------|
| Wevers-de Boer (2012) [The Netherlands] <sup>359</sup> | Pros. Cohort | Reanalysis of IMPROVED RCT – 1987 ACR RA criteria, <2 years symptom duration, or undifferentiated arthritis according to rheumatologist, DAS28 ≥1.6<br>Exclusions: previous therapy with disease modifying antirheumatic drugs or corticosteroids, pregnancy or pregnancy wish during the study, malignancy within the last 5 years, bone marrow hypoplasia, elevated liver enzyme levels (aspartate transaminase (AST) and/or alanine transaminase (ALT)>3 times normal value), serum creatinine level >150 umol/l or estimated creatinine clearance of <75%, uncontrolled diabetes mellitus, uncontrolled hypertension, heart failure (New York Heart Association class III/IV), alcohol or drug abuse, serious infections in the previous 3 months or chronic infectious disease, opportunistic infections within previous 2 months, active or latent hepatitis B infection, documented HIV infection or AIDS, lymphoproliferative disease and multiple sclerosis, active TB or UA patients with latent TB | BMI - continuous                                                                                  | 601   | RA = 52 (13)<br>UA = 52 (16) | RA = 333 (70)<br>UA = 74 (61) | <b>Industry</b> (Abbott)                                                                                                        |
| Wolfe (2012) [USA] <sup>360</sup>                      | Pros. Cohort | RA according to rheumatologist – National Databank for Rheumatoid Diseases                                                                                                                                                                                                                                                                                                                                                                                                                                                                                                                                                                                                                                                                                                                                                                                                                                                                                                                                    | BMI categories:<br>Underweight: <18.5<br>Normal: 18.5-24.9<br>Overweight: 25.0-29.9<br>Obese: ≥30 | 24535 | 58.9 (13.2)                  | 78%                           | <b>Not reported</b>                                                                                                             |
| de Rooy (2011) [The Netherlands] <sup>361</sup>        | Pros. Cohort | Leiden cohort – symptom duration <2 years, RA confirmed by physical exam                                                                                                                                                                                                                                                                                                                                                                                                                                                                                                                                                                                                                                                                                                                                                                                                                                                                                                                                      | BMI – continuous                                                                                  | 676   | 56.4 (15.7)                  | 459 (67.9)                    | <b>Professional body</b> (Dutch Arthritis Association),<br><b>Government</b> (The Netherlands Organization for Health Research) |

AIDS = acquired immune deficiency syndrome, BMI = body mass index, DAS28 = Disease Activity Score 28, N = number, pros. = prospective, SD = standard deviation, TB = tuberculosis, UA = undifferentiated arthritis, USA = United States of America

Table – Rheumatoid arthritis, description of included studies

| Author (date) [country]                         | Study design | Inclusion criteria                                                                                                                              | Exposure detail                                          | N                                    | Age, mean (SD) years                                        | N (%) female                                      | Funders                                                                                                                                                                                                               |
|-------------------------------------------------|--------------|-------------------------------------------------------------------------------------------------------------------------------------------------|----------------------------------------------------------|--------------------------------------|-------------------------------------------------------------|---------------------------------------------------|-----------------------------------------------------------------------------------------------------------------------------------------------------------------------------------------------------------------------|
| Klaasen (2011) [The Netherlands] <sup>362</sup> | Pros. Cohort | 1987 ACR RA criteria, infliximab treatment, DAS28 $\geq$ 3.2<br>Exclusions: intra-articular injection of steroids in previous month to baseline | BMI categories:<br><20<br>20-30<br>>30                   | 89                                   | BMI <20:<br>50 (15)<br>20-30:<br>57 (11)<br>>30:<br>53 (15) | BMI <20: 6 (75)<br>20-30: 47 (71)<br>>30: 13 (87) | <b>Government</b> (The Netherlands Organization for Health Research and Development, The Netherlands Organization for Scientific Research, European Union),<br><b>Professional body</b> (Dutch Arthritis Association) |
| Liao (2011) [USA] <sup>363</sup>                | Pros. Cohort | Brigham Rheumatoid Arthritis Sequential Study (BRASS) - $\geq$ 18 years, diagnosis of RA from rheumatologist                                    | BMI – continuous                                         | Erosion:<br>215<br>No erosion:<br>56 | Erosion:<br>51.3 (13.2)<br>No erosion:<br>45.0 (14.6)       | Erosion: 175 (81.4)<br>no erosion: 44 (78.6)      | <b>Government</b> (NIH),<br><b>Professional body</b> (ACR),<br><b>Charity</b> (Katherine Swan Ginsburg Fund)                                                                                                          |
| Tekaya (2011) [Tunisia] <sup>364</sup>          | Pros. Cohort | ACR RA criteria                                                                                                                                 | BMI categories:<br>Obese ( $\geq$ 30)<br>Not obese (<30) | 119                                  | 51.03 (12.59)                                               | 92 (77.3)                                         | <b>Not reported</b>                                                                                                                                                                                                   |
| Pye (2010) [UK] <sup>365</sup>                  | Pros. Cohort | NOAR – early inflammatory arthritis                                                                                                             | BMI – continuous                                         | 108                                  | 58.0 (13.2)                                                 | 108 (100)                                         | <b>Charity</b> (Arthritis Research UK)                                                                                                                                                                                |

ACR = American College of Rheumatology, BMI = body mass index, DAS28 = Disease activity score 28, N = number, NOAR = Norfolk Arthritis Register, NIH = National Institutes of Health, pros. = prospective, SD = standard deviation, UK = United Kingdom, USA = United States of America

Table – Rheumatoid arthritis, description of included studies

| Author (date) [country]                                      | Study design | Inclusion criteria                                                                                                                                                                                                                                                                                                                     | Exposure detail                        | N                           | Age, mean (SD) years                                                                                                                                                                | N (%) female                                                                                                                                                      | Funders                                                                                                         |
|--------------------------------------------------------------|--------------|----------------------------------------------------------------------------------------------------------------------------------------------------------------------------------------------------------------------------------------------------------------------------------------------------------------------------------------|----------------------------------------|-----------------------------|-------------------------------------------------------------------------------------------------------------------------------------------------------------------------------------|-------------------------------------------------------------------------------------------------------------------------------------------------------------------|-----------------------------------------------------------------------------------------------------------------|
| Verstappen (2010) [The Netherlands] <sup>366</sup>           | Pros. Cohort | CAMERA study – 1) intensive methotrexate treatment, 2) conventional methotrexate treatment– RA patients, methotrexate usage for ≥1 week<br>Exclusions: Creatinine clearance of <75 ml/min, serum aspartate aminotransferase or serum alanine aminotransferase >2x the upper limit of normal (ULN) and alcohol intake of >2 units a day | BMI – continuous                       | 1) 149<br>2) 140            | 1) 54 (14)<br>2) 52 (15)                                                                                                                                                            | 1) 68.5%<br>2) 65.0%                                                                                                                                              | <b>Not reported</b>                                                                                             |
| Furuya (2009) [Japan] <sup>367</sup>                         | Pros. Cohort | IORRA study – 1987 ACR RA criteria                                                                                                                                                                                                                                                                                                     | BMI – continuous                       | 5106                        | Median (IQR)<br>≥1 fall:<br>64 (54, 72)<br>≥2 falls:<br>64 (53, 74.8)<br>no falls:<br>60 (51, 67)                                                                                   | 4231 (82.9)                                                                                                                                                       | <b>Industry</b> (36 pharmaceutical companies), <b>Charity</b> (Japanese Osteoporosis Foundation)                |
| Hashimoto (2009) [Japan] <sup>368</sup>                      | Pros. Cohort | SAMURAI RCT reanalysis – 1987 ACR RA criteria, randomised to TCZ mono or conventional DMARDs                                                                                                                                                                                                                                           | BMI – continuous                       | 145                         | 53.1 (12.5)                                                                                                                                                                         | 119 (82.1)                                                                                                                                                        | <b>Industry</b> (Chugai)                                                                                        |
| van der Helm-van Mil (2008) [The Netherlands] <sup>369</sup> | Pros. Cohort | Leiden cohort and BeST trial reanalysis – 1987 ACR RA criteria, treatment before 2002                                                                                                                                                                                                                                                  | BMI categories:<br><25<br>25-30<br>≥30 | Leiden:<br>332<br>BeST: 257 | Leiden:<br>BMI<25:<br>54.5 (17.1)<br>BMI 25-30:<br>58.3 (13.9)<br>BMI> 30:<br>55.4 (13.5)<br>BeST:<br>BMI<25:<br>53.1 (14.7)<br>BMI25-30:<br>55.9 (12.5)<br>BMI >30:<br>54.2 (10.4) | Leiden:<br>BMI<25:<br>116 (74%)<br>BMI 25-30:<br>88 (60%)<br>BMI> 30:<br>20 (67%)<br>BeST<br>BMI<25:<br>84 (76%)<br>BMI25-30:<br>57 (56%)<br>BMI >30:<br>31 (86%) | <b>Government</b> (Dutch College of Health Insurances), <b>Industry</b> (Schering-Plough, BV and Centocor, Inc) |
| Cohen (2006) [France] <sup>370</sup>                         | Pros. Cohort | 1987 ACR RA criteria                                                                                                                                                                                                                                                                                                                   | BMI – continuous                       | 191                         | 50.5 (14.7)                                                                                                                                                                         | 140 (73.3)                                                                                                                                                        | <b>Not reported</b>                                                                                             |

ACR = American College of Rheumatology, BMI = body mass index, CAMERA = Computer-Assisted Management in Early Rheumatoid Arthritis DMARD = disease modifying anti-rheumatic drug, IORRA = Institute of Rheumatology Rheumatoid Arthritis, IQR = interquartile range, N = number, pros. = prospective, SD = standard deviation, TCZ = tocilizumab

Table – Rheumatoid arthritis, description of included studies

| Author (date) [country]                          | Study design        | Inclusion criteria                                                                                                                                                                                                                                                            | Exposure detail                                                                                    | N                | Age, mean (SD) years                                                             | N (%) female                                                                        | Funders                                                 |
|--------------------------------------------------|---------------------|-------------------------------------------------------------------------------------------------------------------------------------------------------------------------------------------------------------------------------------------------------------------------------|----------------------------------------------------------------------------------------------------|------------------|----------------------------------------------------------------------------------|-------------------------------------------------------------------------------------|---------------------------------------------------------|
| Escalante (2005) [USA] <sup>371</sup>            | Pros. Cohort        | 1987 ACR RA criteria, aged ≥18 years                                                                                                                                                                                                                                          | BMI categorised:<br>Underweight: ≤20<br>Normal: 20- $<$ 25<br>Overweight: 25- $<$ 30<br>Obese: ≥30 | 779              | Underweight: 63 (16)<br>Normal: 56 (14)<br>Overweight: 58 (12)<br>Obese: 52 (13) | Underweight: 27 (71)<br>Normal: 137 (70)<br>Overweight: 165 (62)<br>Obese: 222 (79) | Charity ( Arthritis Foundation),<br>Government (NIH)    |
| Maradit-Kremers (2005) [USA] <sup>372</sup>      | Pros. Cohort        | Mayo Clinic – 1987 ACR RA criteria, aged ≥18 years                                                                                                                                                                                                                            | BMI categories<br>Low BMI: $<$ 20<br>High BMI: $>$ 30                                              | 603              | 58.0 (15.2)                                                                      | 441 (73.1)                                                                          | Government (NIH),<br>Charity (Luso-American Foundation) |
| Skoldstam (2005) [Sweden] <sup>373</sup>         | Pros. Cohort        | Pooled data from three RCTs, analysed as a cohort study – 1984 criteria for RA                                                                                                                                                                                                | Dichotomised as either weight reduction or no weight reduction                                     | 102              | Diet: 54.4 (33-73)<br>Control: 57.0 (35-75)                                      | 84 (82.4)                                                                           | Not reported                                            |
| Maradit-Kremers (2004) [USA] <sup>374</sup>      | Pros. Cohort        | Mayo Clinic – 1987 ACR RA criteria                                                                                                                                                                                                                                            | BMI categories<br>Low BMI: $<$ 20<br>High BMI: $>$ 30                                              | 603              | 58.0 (15.2)                                                                      | 441 (73.1)                                                                          | Government (NIH),<br>Charity (Luso-American Foundation) |
| Hoekstra (2003) [The Netherlands] <sup>375</sup> | Pros. Cohort        | RCT re-analysis of MTX + folic acid trial 1) folic acid + MTX, p) placebo + MTX<br>Exclusions: prior MTX use, a creatinine clearance $<$ 50 ml/min (Cockcroft formula), 28 liver disorders, leucopenia, thrombopenia, alcohol abuse, and treatment with folic or folinic acid | BMI – continuous                                                                                   | 1) 274<br>p) 137 | 1) 55.4 (12.7)<br>p) 57.2 (12.7)                                                 | 1) 189 (69.0)<br>p) 100 (73.0)                                                      | Not reported                                            |
| Krishnan (2012) [USA] <sup>376</sup>             | Time-trend analysis | ARAMIS study – 1987 ACR RA criteria, aged ≥17 years                                                                                                                                                                                                                           | BMI – dichotomised as ≥30 or $<$ 30                                                                | 4651             | 1983: 57.2 (13.0)<br>2006: 64.3 (12.2)                                           | 76%                                                                                 | Industry (Centocor Ortho-Biotech)                       |

ACR = American College of Rheumatology, BMI = body mass index, N = number, NIH = National Institutes of Health, pros. = prospective, RCT = randomised controlled trial, SD = standard deviation, United States of America

Table – Rheumatoid arthritis, description of included studies

| Author (date) [country]                  | Study design  | Inclusion criteria                                                                                                                                                                                   | Exposure detail                                                                                                                               | N    | Age, mean (SD) years                                                                                      | N (%) female                                               | Funders                                                                                                                                      |
|------------------------------------------|---------------|------------------------------------------------------------------------------------------------------------------------------------------------------------------------------------------------------|-----------------------------------------------------------------------------------------------------------------------------------------------|------|-----------------------------------------------------------------------------------------------------------|------------------------------------------------------------|----------------------------------------------------------------------------------------------------------------------------------------------|
| Kreps (2018) [USA] <sup>377</sup>        | Retro. Cohort | Brigham and Women's Hospital - medical review confirmed 2010 ACR/EULAR criteria                                                                                                                      | Weight loss ≥5 kilograms                                                                                                                      | 174  | 60.4 (13.2)                                                                                               | 147 (84.4)                                                 | <b>Charity</b> (Rheumatology Research Foundation), <b>Government</b> (National Institute of Arthritis and Musculoskeletal and Skin Diseases) |
| Mori (2017) [Japan] <sup>378</sup>       | Retro. Cohort | SARABA study – first beginning a biologic DMARD, 1987 or 2010 RA criteria                                                                                                                            | BMI <18.5                                                                                                                                     | 1596 | 60.9 (14.2)                                                                                               | 1237 (77.5)                                                | <b>Hospital</b> (National Hospital Organization)                                                                                             |
| Rashid (2016) [USA] <sup>379</sup>       | Retro. Cohort | Aged ≥18 years, RA diagnosis (ICD9), taking a bDMARD<br>Exclusions: Crohn's disease, psoriasis, psoriatic arthritis, ulcerative colitis, ankylosing spondylitis, regional enteritis, or anal fistula | BMI categories:<br>Normal: 18.5-24.99<br>Overweight: ≥25 & <30<br>Obese: ≥30                                                                  | 2172 | 50 (12.6)                                                                                                 | 1762 (81.2)                                                | <b>Industry</b> (Bristol-Myers Squibb)                                                                                                       |
| Ottaviani (2015) [France] <sup>380</sup> | Retro. Cohort | 2010 ACR / EULAR RA criteria, active RA, receiving rituximab                                                                                                                                         | BMI – continuous                                                                                                                              | 114  | Median (IQR):<br>BMI <25: 50.1 (45.1, 61.3)<br>BMI 25-30: 54.5 (47.2, 60.8)<br>BMI >30: 58.1 (48.4, 61.1) | BMI <25: 33 (87)<br>BMI 25-30: 31 (76)<br>BMI >30: 29 (83) | <b>Industry</b> (Schering Plough)                                                                                                            |
| Ottaviani (2015) [France] <sup>381</sup> | Retro. Cohort | 2010 ACR / EULAR RA criteria, active RA, receiving infliximab                                                                                                                                        | BMI – continuous                                                                                                                              | 76   | Median (IQR): 49.1 (42.3, 55.8)                                                                           | 63 (82.9)                                                  | <b>Not reported</b> – Authors declared no conflicts of interest                                                                              |
| Sparks (2015) [USA] <sup>382</sup>       | Retro. Cohort | 1987 criteria for RA and underwent bariatric surgery                                                                                                                                                 | Weight loss and percentage excess weight loss (percentage of baseline weight loss at each postsurgical time point, 6, 12 and last follow-up)" | 53   | 47.9 (10.5)                                                                                               | 50 (94.3)                                                  | <b>Charity</b> (Rheumatology Research Foundation), <b>Government</b> (NIH)                                                                   |

ACR = American College of Rheumatology, BMI = body mass index, DMARD = disease modifying anti-rheumatic drug, EULAR = European League Against Rheumatism, IQR = interquartile range, N = number, NIH = National Institutes of Health, Retro. = retrospective, SD = standard deviation, USA = United States of America

Table – Rheumatoid arthritis, description of included studies

| Author (date)<br>[country]                     | Study design              | Inclusion criteria                                                   | Exposure detail                                         | N    | Age, mean<br>(SD) years | N (%) female | Funders                                                                                                         |
|------------------------------------------------|---------------------------|----------------------------------------------------------------------|---------------------------------------------------------|------|-------------------------|--------------|-----------------------------------------------------------------------------------------------------------------|
| Gonzalez<br>(2008)<br>[USA] <sup>383</sup>     | Retro.<br>Cohort          | Mayo Clinic – 1987 ACR RA criteria, inception cohort, aged ≥18 years | BMI categories:<br>Obese = ≥30 BMI<br>Low BMI = <20 BMI | 603  | 58                      | 73%          | <b>Government</b> (NIH)                                                                                         |
| Kent (2004)<br>[USA] <sup>384</sup>            | Retro.<br>Cohort          | Mayo Clinic                                                          | BMI – continuous                                        | 481  | 47 (14)                 | 334 (69.4)   | <b>Not reported</b>                                                                                             |
| Nadareishvili<br>(2008)<br>[USA] <sup>83</sup> | Nested<br>Case<br>control | National Database for Rheumatoid Diseases - aged 25-110              | BMI – continuous                                        | 1230 | 70.0 (9.6)              | 73.2         | <b>Industry</b> (Centocor, Sanofi-Aventis, Bristol-Myers Squibb, Abbott, Amgen, Wyeth-Australia, Merck, Pfizer) |

ACR = American College of Rheumatology, BMI = body mass index, N = number, NIH = National Institutes of Health, Retro. = retrospective, SD = standard deviation, United States of America



## Supplementary table 117 – Pain outcomes from observational studies in RA

Table – Pain (RA), results and quality assessment of observational studies

| Study (date) [study type]                             | Results                                                                                                                                                                                                                                                                                                                                                                                                                                                                                     | Weight associated with outcome | AMSTAR2  | Study Pop. | Attr. | Prog. Meas. | Outc. Meas. | Conf. | Stats. |
|-------------------------------------------------------|---------------------------------------------------------------------------------------------------------------------------------------------------------------------------------------------------------------------------------------------------------------------------------------------------------------------------------------------------------------------------------------------------------------------------------------------------------------------------------------------|--------------------------------|----------|------------|-------|-------------|-------------|-------|--------|
| Liu (2017) [MA] <sup>322</sup>                        | <u>Pain</u><br>3/3 studies reported higher pain scores in obese patients vs non-obese                                                                                                                                                                                                                                                                                                                                                                                                       | ✓                              | Moderate |            |       |             |             |       |        |
| McWilliams (2016) [Prospective cohort] <sup>347</sup> | <u>SF36 pain &gt;median at 1 year, TNF / non-TNF OR (95% CI)</u><br>BMI <25: ref<br>25-30: 1.22 (1.10, 1.35) / 1.12 (0.92, 1.35) [unadj]<br>≥30: 1.48 (1.33, 1.66) / 1.60 (1.30, 1.98) [unadj]<br>BMI per group increase: 1.13 (1.05, 1.21) / 1.07 (0.93, 1.22) [adj]                                                                                                                                                                                                                       | ✓                              |          | L          | M     | L           | L           | L     | L      |
| Sandberg (2014) [Prospective cohort] <sup>354</sup>   | <u>Pain VAS remission, 3 mth/6mth, OR (95% CI) [adjusted]</u><br>normal: ref<br>overweight: 0.59 (0.37, 0.95) / 0.67 (0.42, 1.07)<br>obese: 0.53 (0.29, 0.97) / 0.59 (0.30, 1.16)<br>per unit BMI: 0.96 (0.92, 1.00) / 0.95 (0.90, 1.00)<br><u>Pain decrease over median, 3 mth/6mth, OR (95% CI) [adjusted]</u><br>normal: ref<br>overweight: 0.75 (0.45, 1.27) / 0.73 (0.42, 1.28)<br>obese: 0.43 (0.22, 0.85) / 0.73 (0.33, 1.62)<br>per unit BMI: 0.93 (0.88, 0.98) / 0.98 (0.92, 1.04) | ✓                              |          | L          | M     | L           | L           | L     | L      |
| Ajeganova (2013) [Prospective cohort] <sup>355</sup>  | <u>VAS pain, mean difference (95% CI)</u><br>BMI at BL: 0.014 (0.003, 0.025)<br>BMI≥30 vs 20-30 at BL: 0.05 (-0.02, 0.12)<br>BMI≥28 vs 20-28 at BL: 0.08 (0.03, 0.14)<br>Waist circumference: 0.02 (-0.02, 0.06)<br>Central obesity: 0.04 (-0.04, 0.12)                                                                                                                                                                                                                                     | ✓                              |          | L          | M     | M           | L           | L     | L      |
| Skoldstam (2005) [Prospective cohort] <sup>373</sup>  | <u>OR between reduction and no reduction of body weight with outcome [unadjusted]</u><br>Dichotomised pain score (improvement or no improvement):<br>OR 2.10 (p=0.10)                                                                                                                                                                                                                                                                                                                       | ✘                              |          | L          | L     | L           | L           | H     | H      |

AMSTAR2 = Assessing the Methodological Quality of Systematic Reviews, Attr. = attrition, BL = baseline, BMI = body mass index, CI = confidence interval, Conf. = confounding, L = low risk of bias, M = moderate risk of bias, MA = meta-analysis, OR = odds ratio, Outc. Meas = outcome measurement, Prog. Meas. = prognostic factor measurement, RA = rheumatoid arthritis, Rand. Seq. = random sequence generation, SD = standard deviation, Stats. = statistical analysis, Study Pop. = study population, TNF = tumour necrosis factor, VAS = visual analogue scale

## Supplementary table 118 – Function outcomes from observational studies in RA

Table – Function (RA), results and quality assessment of observational studies

| Study (date) [study type]                             | Results                                                                                                                                                                                                                                                                                                              | Weight associated with outcome | AMSTAR2  | Study Pop. | Attr. | Prog. Meas. | Outc. Meas. | Conf. | Stats. |
|-------------------------------------------------------|----------------------------------------------------------------------------------------------------------------------------------------------------------------------------------------------------------------------------------------------------------------------------------------------------------------------|--------------------------------|----------|------------|-------|-------------|-------------|-------|--------|
| Liu (2017) [MA] <sup>322</sup>                        | <u>HAQ</u><br>2/2 studies reported higher HAQ scores in obese patients vs non-obese                                                                                                                                                                                                                                  | ✓                              | Moderate |            |       |             |             |       |        |
| Nikiphorou (2018) [Prospective cohort] <sup>329</sup> | <u>HAQ at 2 / 5 years, mean (95% CI) [adjusted]</u><br>BL normal/over: 0.83 (0.79, 0.87) / 0.99 (0.94, 1.04)<br>BL obese: 0.98 (0.89, 1.07) / 1.07 (0.97, 1.17)<br>BL underweight: 0.88 (0.57, 1.18) / 0.84 (0.51, 1.18)<br>p values obese vs normal: 0.003 / 0.165<br>p values underweight vs normal: 0.764 / 0.405 | ✓                              |          | L          | L     | L           | L           | L     | L      |
| George (2017) [Prospective cohort] <sup>337</sup>     | <u>Low HAQ (≤0.5) at week 24, OR (95% CI) [adjusted]</u><br>obese vs not: 0.49 (0.28, 0.89)                                                                                                                                                                                                                          | ✓                              |          | L          | L     | L           | L           | L     | M      |
| Miwa (2017) [Prospective cohort] <sup>342</sup>       | <u>HAQ &lt;0.5 at follow-up, median (IQR) BMI and BL</u><br>HAQ ≤0.5: 21 (20, 24)<br>HAQ >0.5: 21 (19, 25) p=0.830                                                                                                                                                                                                   | ✗                              |          | M          | M     | L           | L           | H     | H      |
| Ajeganova (2013) [Prospective cohort] <sup>355</sup>  | <u>HAQ, mean difference (95% CI)</u><br>BMI at BL: 0.021 per unit BMI (0.009, 0.033)<br>BMI ≥30 vs 20-30 at BL: 0.10 (0.03, 0.17)<br>BMI ≥28 vs 20-28 at BL: 0.11 (0.05, 0.07)<br>Waist circumference: 0.09 (0.05, 0.11)<br>Central obesity: 0.09 (0.01, 0.18)                                                       | ✓                              |          | L          | M     | M           | L           | L     | L      |
| Tekaya (2011) [Prospective cohort] <sup>364</sup>     | <u>HAQ</u><br>obese: 1.49 (0.81)<br>non obese: 1.38 (0.84) p=0.51                                                                                                                                                                                                                                                    | ✗                              |          | L          | L     | L           | L           | H     | H      |
| Krishnan (2012) [Time-trend analysis] <sup>376</sup>  | <u>HAQ slope over time, regression coef (95% CI)</u><br>BMI ≥30: -0.0210 (-0.024, -0.018)<br>BMI <30: -0.0160 (-0.017, -0.014)<br>i.e. in both subgroups, HAQ was getting lower over time                                                                                                                            | ✓                              |          | L          | L     | L           | L           | L     | M      |

AMSTAR2 = Assessing the Methodological Quality of Systematic Reviews, Attr. = attrition, BL = baseline, BMI = body mass index, CI = confidence interval, Conf. = confounding, HAQ = Health Assessment Questionnaire, IQR = interquartile range, L = low risk of bias, M = moderate risk of bias, MA = meta-analysis, Outc. Meas = outcome measurement, Prog. Meas. = prognostic factor measurement, Pros = prospective, RA = rheumatoid arthritis, Rand. Seq. = random sequence generation, SD = standard deviation, Stats. = statistical analysis, Study Pop. = study population

## Supplementary table 119 – Disease activity outcomes from observational studies in RA

Table – Disease activity (RA), results and quality assessment of observational studies

| Study (date) [study type]                             | Results                                                                                                                                                                                                                                                                                                                                                                                                                                 | Weight associated with outcome | AMSTAR2  | Study Pop. | Attr. | Prog. Meas. | Outc. Meas. | Conf. | Stats. |
|-------------------------------------------------------|-----------------------------------------------------------------------------------------------------------------------------------------------------------------------------------------------------------------------------------------------------------------------------------------------------------------------------------------------------------------------------------------------------------------------------------------|--------------------------------|----------|------------|-------|-------------|-------------|-------|--------|
| Liu (2017) [MA] <sup>322</sup>                        | <u>Remission</u><br>Obese vs non-obese: Meta-OR 0.53 (0.41, 0.69)<br><u>DAS28</u><br>6/8 studies reported higher DAS28 in obese patients compared to non-obese patients                                                                                                                                                                                                                                                                 | ✓                              | Moderate |            |       |             |             |       |        |
| Lupoli (2016) [MA] <sup>323</sup>                     | <u>Minimal disease activity</u><br>Obese vs non-obese: OR 0.58 (0.40, 0.85)                                                                                                                                                                                                                                                                                                                                                             | ✓                              | Low      |            |       |             |             |       |        |
| Nikiphorou (2018) [Prospective cohort] <sup>329</sup> | <u>DAS28, 2 years / 5 years, mean (95% CI) [adjusted]</u><br>BL normal/over: 3.53 (3.44, 3.62) / 3.81 (3.71, 3.90)<br>BL obese: 3.85 (3.68, 4.03) / 3.85 (3.64, 4.05)<br>BL underweight: 3.89 (3.29, 4.50) / 3.35 (2.68, 4.01)<br>p values obese vs normal: 0.001 / 0.727<br>p values underweight vs normal: 0.243 / 0.182<br><u>low disease activity, bl-2 year, OR (95% CI) [adjusted]</u><br>obese vs normal/over: 0.52 (0.41, 0.65) | ✓                              |          | L          | L     | L           | L           | L     | L      |
| Schulman (2018) [Prospective cohort] <sup>331</sup>   | <u>Sustained remission, adjusted HR (95%CI)</u><br>Healthy BMI: ref<br>Overweight: HR 0.75 (0.58-0.98)<br>Obese: HR 0.53 (0.39-0.71)                                                                                                                                                                                                                                                                                                    | ✓                              |          | L          | H     | L           | L           | L     | M      |
| Smolen (2018) [Prospective cohort] <sup>332</sup>     | <u>DAS28 remission, OR (95% CI) [adjusted]</u><br><18.5=ref<br>18.5-25: 1.41 (0.57-3.51)<br>25-30: 1.25 (0.50-3.13)<br>>30: 0.79 (0.31-2.05)<br>BMI continuous: 0.96 (0.93, 0.99)                                                                                                                                                                                                                                                       | ✓                              |          | L          | L     | L           | L           | L     | M      |
| Bird (2017) [Prospective cohort] <sup>335</sup>       | <u>DAS28 remission, unadjusted OR (95% CI) / adjusted</u><br>Weight per kg: OR 0.99 (0.97, 1.00) / 0.98 (0.97, 1.00)                                                                                                                                                                                                                                                                                                                    | ✓                              |          | M          | H     | L           | L           | M     | M      |

AMSTAR2 = Assessing the Methodological Quality of Systematic Reviews, Attr. = attrition, BL = baseline, BMI = body mass index, CI = confidence interval, Conf. = confounding, DAS28 = Disease activity score (28), HR = hazard ratio, L = low risk of bias, M = moderate risk of bias, MA = meta-analysis, OR = odds ratio, Outc. Meas = outcome measurement, Prog. Meas. = prognostic factor measurement, RA = rheumatoid arthritis, Rand. Seq. = random sequence generation, Stats. = statistical analysis, Study Pop. = study population

Table – Disease activity (RA), results and quality assessment of observational studies

| Study (date) [study type]                                               | Results                                                                                                                                                                                                                                                                                                                                                                             | Weight associated with outcome | AMSTAR2 | Study Pop. | Attr. | Prog. Meas. | Outc. Meas. | Conf. | Stats. |
|-------------------------------------------------------------------------|-------------------------------------------------------------------------------------------------------------------------------------------------------------------------------------------------------------------------------------------------------------------------------------------------------------------------------------------------------------------------------------|--------------------------------|---------|------------|-------|-------------|-------------|-------|--------|
| D'Agostino (2017)<br>[Prospective cohort] <sup>336</sup><br>(abatacept) | <u>DAS28 remission, % (95% CI) at 6 mths</u><br>BMI <25: 26.2 (22.2, 30.1)<br>BMI 25-30: 24.9 (20.9, 28.8)<br>BMI ≥30: 22.0 (17.9, 26.0)<br><u>SDAI // CDAI remission, % (95% CI) at 6 mths</u><br>BMI <25: 9.9 (7.2, 12.5) // 10.4 (7.6, 13.1)<br>BMI 25-30: 11.7 (8.8, 14.7) // 13.4 (10.3, 16.5)<br>BMI ≥30: 10.9 (7.8, 14.0) // 13.1 (9.8, 16.4)                                | *                              |         | M          | L     | L           | L           | H     | M      |
| George (2017)<br>[Prospective cohort] <sup>337</sup>                    | <u>DAS28 remission at week 24, OR (95% CI) [adjusted]</u><br>Obese vs not: OR 0.47 (0.24, 0.92)                                                                                                                                                                                                                                                                                     | ✓                              |         | L          | L     | L           | L           | L     | M      |
| Iannone (2017)<br>[Prospective cohort] <sup>338</sup><br>(abatacept)    | <u>EULAR mod/good response, N(%) / difference from normal weight (95% CI) §</u><br>Normal: 39.8%<br>Overweight: 42.9% / 3.1% (-0.3, 0.1) [sic]<br>Obese: 40.0% / 0.2% (-0.08, 0.08) [sic]<br>Severely obese: 49.4% / 9.6% (-0.04, 0.23)                                                                                                                                             | *                              |         | L          | H     | L           | L           | L     | M      |
| Levitsky (2017)<br>[Prospective cohort] <sup>340</sup>                  | <u>Non-remission at 24 months, OR (95% CI)</u><br>BL obesity: 5.4 (1.9, 15.2) [unadjusted] / 5.2 (1.8, 15.2) [adjusted]                                                                                                                                                                                                                                                             | ✓                              |         | L          | M     | L           | L           | L     | M      |
| Mariette (2017)<br>[Prospective cohort] <sup>341</sup><br>(abatacept)   | <u>Moderate/good response, %</u><br>BMI <25: 80.7%<br>BMI 25-30: 86.1%<br>BMI ≥30: 77.0% p=0.178                                                                                                                                                                                                                                                                                    | *                              |         | L          | L     | L           | L           | L     | M      |
| Ramirez (2017)<br>[Prospective cohort] <sup>343</sup>                   | <u>Synovitis score, change BL-12 months, regression coefficient [adjusted]</u><br>"Higher" BMI 0.22 – no CI reported                                                                                                                                                                                                                                                                | ✓                              |         | L          | L     | L           | L           | M     | M      |
| Gardette (2016)<br>[Prospective cohort] <sup>345</sup><br>(abatacept)   | <u>DAS28 decrease ≥1.2, median (IQR) BMI</u><br>DAS response: 25.0 (23.4-31.3)<br>no DAS response: 26.3 (22.9, 30.2) p=0.95<br><u>EULAR good response, median (IQR) BMI</u><br>good response: 26.4 (23.5, 30.9)<br>no good response: 26.0 (22.9, 30.6) p=0.96<br><u>EULAR remission, median (IQR) BMI</u><br>remission: 26.7 (21.7, 30.3)<br>no remission: 26.0 (23.0, 30.1) p=0.83 | *                              |         | L          | L     | L           | L           | H     | H      |

§ Outcome actually LUNDEX – EULAR response adjusted for drug retention

AMSTAR2 = Assessing the Methodological Quality of Systematic Reviews, Attr. = attrition, BL = baseline, BMI = body mass index, CDAI = Clinical Disease Activity Index, CI = confidence interval, Conf. = confounding, DAS28 = Disease activity score (28), EULAR = European League Against Rheumatism, IQR = interquartile range, L = low risk of bias, M = moderate risk of bias, OR = odds ratio, Outc. Meas = outcome measurement, Prog. Meas. = prognostic factor measurement, RA = rheumatoid arthritis, Rand. Seq. = random sequence generation, SD = standard deviation, SDAI = Simplified Disease Activity Index, Stats. = statistical analysis, Study Pop. = study population

Table – Disease activity (RA), results and quality assessment of observational studies

| Study (date) [study type]                                               | Results                                                                                                                                                                                                                                                                                                                                                                                                                                                       | Weight associated with outcome | AMSTAR2 | Study Pop. | Attr. | Prog. Meas. | Outc. Meas. | Conf. | Stats. |
|-------------------------------------------------------------------------|---------------------------------------------------------------------------------------------------------------------------------------------------------------------------------------------------------------------------------------------------------------------------------------------------------------------------------------------------------------------------------------------------------------------------------------------------------------|--------------------------------|---------|------------|-------|-------------|-------------|-------|--------|
| Gardette (2016)<br>[Prospective cohort] <sup>346</sup><br>(tocilizumab) | <u>DAS28 decrease <math>\geq 1.2</math>, median (IQR) BMI</u><br>DAS response: 25.7 (22.1, 29.9)<br>No DAS response: 24.9 (22.0, 27.1) p=0.38<br><u>EULAR good response, median (IQR) BMI</u><br>Good response: 25.9 (22.8, 30.0)<br>No good response: 25.4 (22.0, 28.4) p=0.61<br><u>EULAR remission, median (IQR) BMI</u><br>Remission: 25.1 (22.5, 28.6)<br>No remission: 25.4 (22.0, 28.9) p=0.76                                                         | *                              |         | L          | L     | L           | L           | H     | H      |
| Iannone (2015)<br>[Prospective cohort] <sup>350</sup>                   | <u>DAS28 remission at 12 months, N(%)</u><br>Normal: 46%<br>Overweight: 55%<br>Obese: 12% p=0.004<br><u>EULAR good response at 12 months, N(%)</u><br>Normal: 75%<br>Overweight: 79%<br>Obese: 33% p=0.01                                                                                                                                                                                                                                                     | ✓                              |         | L          | L     | L           | L           | L     | L      |
| Pers (2015)<br>[Prospective cohort] <sup>351</sup><br>(tocilizumab)     | <u>EULAR response, OR (95% CI)</u><br><25 BMI: ref<br>25-30: OR 0.45 (0.16, 1.24)<br>>30: OR 1.19 (0.31, 4.48)<br>>25 vs <25: OR 0.64 (0.26, 1.60)<br><u>Remission, OR (95% CI)</u><br><25 BMI: ref<br>25-30: OR 0.41 (0.14, 1.16)<br>>30: 0.61 (0.21, 1.70)<br>> 25 vs <25: OR 0.50 (0.22, 1.14)<br><u>Low disease activity, OR (95% CI)</u><br><25 BMI: ref<br>25-30: OR 0.59 (0.23, 1.55)<br>>30: OR 1.41 (0.46, 4.36)<br>>25 vs <25: OR 0.84 (0.37, 1.91) | *                              |         | L          | L     | L           | L           | L     | L      |

AMSTAR2 = Assessing the Methodological Quality of Systematic Reviews, Attr. = attrition, BMI = body mass index, CI = confidence interval, Conf. = confounding, DAS28 = Disease activity score (28), EULAR = European League Against Rheumatism, IQR = interquartile range, L = low risk of bias, M = moderate risk of bias, N = number, OR = odds ratio, Outc. Meas = outcome measurement, Prog. Meas. = prognostic factor measurement, RA = rheumatoid arthritis, Rand. Seq. = random sequence generation, SD = standard deviation, Stats. = statistical analysis, Study Pop. = study population

Table – Disease activity (RA), results and quality assessment of observational studies

| Study (date) [study type]                                             | Results                                                                                                                                                                                                                                                                                                                                                                                                                                                                                                                                                                                                                                                                                                                                                                                                                                                                                                                                                                                        | Weight associated with outcome | AMSTAR2 | Study Pop. | Attr. | Prog. Meas. | Outc. Meas. | Conf. | Stats. |
|-----------------------------------------------------------------------|------------------------------------------------------------------------------------------------------------------------------------------------------------------------------------------------------------------------------------------------------------------------------------------------------------------------------------------------------------------------------------------------------------------------------------------------------------------------------------------------------------------------------------------------------------------------------------------------------------------------------------------------------------------------------------------------------------------------------------------------------------------------------------------------------------------------------------------------------------------------------------------------------------------------------------------------------------------------------------------------|--------------------------------|---------|------------|-------|-------------|-------------|-------|--------|
| Sandberg (2014)<br>[Prospective cohort] <sup>354</sup>                | <u>DAS28 (decrease over median), 3 mth/6mth, OR (95% CI) [adjusted]</u><br>Normal: ref<br>Overweight: 0.71 (0.45, 1.13) / 0.54 (0.32, 0.90)<br>Obese: 0.37 (0.20, 0.68) / 0.44 (0.22, 0.90)<br>Per unit BMI: 0.93 (0.88, 0.97) / 0.94 (0.89, 0.99)<br><u>DAS28 (low disease activity), 3 mth/6mth, OR (95% CI) [adjusted]</u><br>Normal: ref<br>Overweight: 0.73 (0.47, 1.13) / 0.50 (0.30, 0.81)<br>Obese: 0.56 (0.32, 0.99) / 0.48 (0.25, 0.94)<br>Per unit BMI: 0.95 (0.91, 0.99) / 0.94 (0.89, 0.99)<br><u>EULAR good response, 3 mth/6mth, OR (95% CI) [adjusted]</u><br>Normal: ref<br>Overweight: 0.82 (0.54, 1.26) / 0.50 (0.31, 0.81)<br>Obese: 0.62 (0.36, 1.09) / 0.48 (0.25, 0.92)<br>Per unit BMI: 0.96 (0.92, 1.00) / 0.94 (0.89, 0.99)<br><u>EULAR remission, 3 mth/6mth, OR (95% CI) [adjusted]</u><br>Normal: ref<br>Overweight: 0.91 (0.58, 1.41) / 0.68 (0.42, 1.10)<br>Obese: 0.76 (0.43, 1.37) / 0.36 (0.18, 0.74)<br>Per unit BMI: 0.97 (0.93, 1.02) / 0.92 (0.87, 0.97) | ✓                              |         | L          | M     | L           | L           | L     | L      |
| Ajeganova (2013)<br>[Prospective cohort] <sup>355</sup>               | <u>DAS28, mean difference (95% CI)</u><br>BMI at BL: 0.008 per unit BMI (0.002, 0.014)<br>BMI <sub>≥30</sub> vs 20-30 at BL: 0.03 (0, 0.06)<br>BMI <sub>≥28</sub> vs 20-30 at BL: 0.04 (0.02, 0.07)<br>Waist circumference: 0.01 (-0.01, 0.03)<br>Central bbesity: 0.04 (0.01, 0.08)                                                                                                                                                                                                                                                                                                                                                                                                                                                                                                                                                                                                                                                                                                           | ✓                              |         | L          | M     | M           | L           | L     | L      |
| Gremese (2013)<br>[Prospective cohort] <sup>356</sup>                 | <u>DAS28 remission at 12 months, OR (95% CI)</u><br>BMI continuous: 0.892 (0.806, 0.987) [adjusted]<br>BMI <20 vs 20-30: 2.03 (1.91, 3.46)<br>BMI 20-30 vs >30: 2.43 (1.21, 4.88)                                                                                                                                                                                                                                                                                                                                                                                                                                                                                                                                                                                                                                                                                                                                                                                                              | ✓                              |         | L          | H     | L           | L           | L     | M      |
| Wevers-de Boer (2012)<br>[Prospective cohort] <sup>359</sup>          | <u>DAS28&lt;1.6 multivariable, OR</u><br>BMI = 0.94 (0.90 to 0.98)                                                                                                                                                                                                                                                                                                                                                                                                                                                                                                                                                                                                                                                                                                                                                                                                                                                                                                                             | ✓                              |         | L          | L     | L           | L           | M     | M      |
| Klaasen (2011)<br>[Prospective cohort] <sup>362</sup><br>(infliximab) | <u>DAS28, change BL-16 weeks, mean diff (95% CI)</u><br>BMI continuous: -0.094 (-0.149, -0.038)<br><u>DAS28 response, change BL-16 weeks, %</u><br><20: 84%<br>20-30: 75%<br>>30: 50%                                                                                                                                                                                                                                                                                                                                                                                                                                                                                                                                                                                                                                                                                                                                                                                                          | ✓                              |         | M          | L     | L           | L           | M     | H      |

AMSTAR2 = Assessing the Methodological Quality of Systematic Reviews, Attr. = attrition, BMI = body mass index, BL = baseline, BMI = body mass index, CI = confidence interval, Conf. = confounding, DAS28 = Disease activity score (28), EULAR = European League Against Rheumatism, L = low risk of bias, M = moderate risk of bias, OR = odds ratio, Outc. Meas = outcome measurement, Prog. Meas. = prognostic factor measurement, Pros = prospective, RA = rheumatoid arthritis, Rand. Seq. = random sequence generation, stats. = statistical analysis, Study Pop. = study population

Table – Disease activity (RA), results and quality assessment of observational studies

| Study (date) [study type]                                                | Results                                                                                                                                                                                                                                                                                                                                                                            | Weight associated with outcome | AMSTAR2 | Study Pop. | Attr. | Prog. Meas. | Outc. Meas. | Conf. | Stats. |
|--------------------------------------------------------------------------|------------------------------------------------------------------------------------------------------------------------------------------------------------------------------------------------------------------------------------------------------------------------------------------------------------------------------------------------------------------------------------|--------------------------------|---------|------------|-------|-------------|-------------|-------|--------|
| Kreps (2018)<br>[Retrospective cohort] <sup>377</sup>                    | <u>≥ 5 point improvement CDAI, OR (95% CI) [adj]</u><br>BMI ≥25 and did not lose 5kg: ref<br>BMI ≥25 & lost 5kg: 3.03 (1.18, 7.83)<br>BMI <25 and did not lose 5kg: 1.90 (0.88, 4.11)                                                                                                                                                                                              | ✓                              |         | L          | L     | L           | L           | M     | L      |
| Ottaviani (2015)<br>[Retrospective cohort] <sup>380</sup><br>(rituximab) | <u>DAS28 response, median BL BMI</u><br>Response: BMI 26.9 (24.1, 30.1)<br>No response: BMI 26.8 (23.2, 31.6) p=0.78 [unadj]<br><u>EULAR good response, median BL BMI</u><br>Response: BMI 27.7 (24.3, 30.7)<br>No response: BMI 26.7 (22.3, 31.5) p=0.57<br><u>EULAR remission, , median BL BMI</u><br>Remission: 26.9 (24.1, 30.8)<br>No remission: 26.8 (23.2, 31.5) p=0.94     | ✘                              |         | L          | L     | L           | L           | M     | M      |
| Ottaviani (2015)<br>[Retrospective cohort] <sup>381</sup> (infliximab)   | <u>DAS response, OR (95% CI)</u><br>BMI 0.88 (0.79, 0.98) [adj]<br><u>EULAR good response, OR (95% CI)</u><br>BMI: 0.87 (0.76, 0.99) [adj]<br><u>EULAR remission, OR (95% CI)</u><br>BMI 0.88 (0.75, 1.04) [adj]                                                                                                                                                                   | ✓                              |         | L          | L     | L           | L           | M     | M      |
| Sparks (2015)<br>[Retrospective cohort] <sup>382</sup>                   | <u>N (%) 6 months after bariatric surgery compared to baseline, §</u><br><u>p&lt;0.001:</u><br>Remission= 38 (72%) §<br>Low DAS =12 (23%) §<br>Moderate DAS = 2 (4%)<br>High DAS = 1 (2%)<br><u>N(%) 12 months after bariatric surgery compared to baseline, sign</u><br><u>p&lt;0.001:</u><br>Remission: 36 (68%)<br>Low DAS: 9 (17%)<br>Moderate DAS: 3 (6%)<br>High DAS: 0 (0%) | ✓                              |         | L          | L     | L           | L           | M     | M      |

AMSTAR2 = Assessing the Methodological Quality of Systematic Reviews, Attr. = attrition, BL = baseline, BMI = body mass index, CDAI = Clinical Disease Activity Index, CI = confidence interval, Conf. = confounding, DAS28 = Disease activity score (28), EULAR = European League Against Rheumatism, L = low risk of bias, M = moderate risk of bias, N = number, OR = odds ratio, Outc. Meas = outcome measurement, Prog. Meas. = prognostic factor measurement, RA = rheumatoid arthritis, Rand. Seq. = random sequence generation, Stats. = statistical analysis, Study Pop. = study population

## Supplementary table 120 – Tender joint count outcomes from observational studies in RA

Table – Tender joint count (RA), results and quality assessment of observational studies

| Study (date) [study type]                                         | Results                                                                                                                                 | Weight associated with outcome | AMSTAR2  | Study Pop. | Attr. | Prog. Meas. | Outc. Meas. | Conf. | Stats. |
|-------------------------------------------------------------------|-----------------------------------------------------------------------------------------------------------------------------------------|--------------------------------|----------|------------|-------|-------------|-------------|-------|--------|
| Liu (2017) [MA] <sup>322</sup>                                    | <u>Tender joint count</u><br>2/3 studies reported higher TJC in obese vs non-obese patients                                             | ✓                              | Moderate |            |       |             |             |       |        |
| D'Agostino (2017) [Prospective cohort] <sup>336</sup> (abatacept) | <u>Tender joint count, change BL-6 mths, mean (SD)</u><br>BMI <25: -11.4 (0.3)<br>BMI 25-30: -11.4 (0.3)<br>BMI ≥30: -11.7 (0.4)        | ✗                              |          | M          | L     | L           | L           | H     | M      |
| Klaasen (2011) [Prospective cohort] <sup>362</sup> (infliximab)   | <u>Tender joint count, change BL-16 weeks, mean diff (95% CI)</u><br>BMI cont: -0.482 (-0.745, -0.218)                                  | ✓                              |          | M          | L     | L           | L           | M     | H      |
| Skoldstam (2005) [Prospective cohort] <sup>373</sup>              | <u>OR between reduction and no reduction of body weight with outcome [unadjusted]</u><br>Dichotomised tender joint count: 1.77 (p=0.20) | ✗                              |          | L          | L     | L           | L           | H     | H      |

AMSTAR2 = Assessing the Methodological Quality of Systematic Reviews, Attr. = attrition, BL = baseline, BMI = body mass index, CI = confidence interval, Conf. = confounding, L = low risk of bias, M = moderate risk of bias, MA = meta-analysis, OR = odds ratio, Outc. Meas = outcome measurement, Prog. Meas. = prognostic factor measurement, RA = rheumatoid arthritis, Rand. Seq. = random sequence generation, SD = standard deviation, SE = standard error, SMD = Standardised mean difference, Stats. = statistical analysis, Study Pop. = study population



## Supplementary table 121 – Swollen joint count outcomes from observational studies in RA

Table – Swollen joint count (RA), results and quality assessment of observational studies

| Study (date) [study type]                                         | Results                                                                                                                          | Weight associated with outcome | AMSTAR2  | Study Pop. | Attr. | Prog. Meas. | Outc. Meas. | Conf. | Stats. |
|-------------------------------------------------------------------|----------------------------------------------------------------------------------------------------------------------------------|--------------------------------|----------|------------|-------|-------------|-------------|-------|--------|
| Liu (2017) [MA] <sup>322</sup>                                    | <u>Swollen joint count</u><br>0/5 studies reported high swollen joint count in obese vs non-obese patients                       | *                              | Moderate |            |       |             |             |       |        |
| D'Agostino (2017) [Prospective cohort] <sup>336</sup> (abatacept) | <u>Swollen joint count, change BL-6 mths, mean (SD)</u><br>BMI <25: -10.0 (0.3)<br>BMI 25-30: -8.5 (0.3)<br>BMI ≥30: -10.0 (0.3) | *                              |          | M          | L     | L           | L           | H     | M      |
| Klaasen (2011) [Prospective cohort] <sup>362</sup> (infliximab)   | <u>Swollen joint count, change BL-16 weeks, mean diff (95% CI)</u><br>BMI cont: -0.196 (-0.401, 0.009)                           | *                              |          | M          | L     | L           | L           | M     | H      |

AMSTAR2 = Assessing the Methodological Quality of Systematic Reviews, Attr. = attrition, BL = baseline, BMI = body mass index, CI = confidence interval, Conf. = confounding, H = high, L = low risk of bias, M = moderate risk of bias, MA = meta-analysis, Outc. Meas = outcome measurement, Prog. Meas. = prognostic factor measurement, Pros = prospective, RA = rheumatoid arthritis, Rand. Seq. = random sequence generation, SD = standard deviation, Stats. = statistical analysis, Study Pop. = study population

## Supplementary table 122 – Patient global assessment outcomes from observational studies in RA

Table – Patient global assessment (RA), results and quality assessment of observational studies

| Study (date) [study type]                                         | Results                                                                                                                              | Weight associated with outcome | AMSTAR2  | Study Pop. | Attr. | Prog. Meas. | Outc. Meas. | Conf. | Stats. |
|-------------------------------------------------------------------|--------------------------------------------------------------------------------------------------------------------------------------|--------------------------------|----------|------------|-------|-------------|-------------|-------|--------|
| Liu (2017) [MA] <sup>322</sup>                                    | <u>Patient global</u><br>3/3 studies reported higher scores in obese vs non-obese patients                                           | ✓                              | Moderate |            |       |             |             |       |        |
| D'Agostino (2017) [Prospective cohort] <sup>336</sup> (abatacept) | <u>Patient global (0-100), change BL-6 mths, mean (SD)</u><br>BMI <25: -35.7 (1.2)<br>BMI 25-30: -34.8 (1.2)<br>BMI ≥30: -32.3 (1.4) | ✘                              |          | M          | L     | L           | L           | H     | M      |
| George (2017) [Prospective cohort] <sup>337</sup>                 | <u>Patient global ≤1, OR (95% CI) [adjusted]</u><br>obese vs not: 0.47 (0.24, 0.92)                                                  | ✓                              |          | L          | L     | L           | L           | L     | M      |
| Klaasen (2011) [Prospective cohort] <sup>362</sup> (infliximab)   | <u>Patient global VAS, change BL-16 weeks, mean diff (95% CI)</u><br>BMI continuous: -1.080 (-2.107, -0.052)                         | ✓                              |          | M          | L     | L           | L           | M     | H      |

AMSTAR2 = Assessing the Methodological Quality of Systematic Reviews, Attr. = attrition, BL = baseline, BMI = body mass index, CI = confidence interval, Conf. = confounding, L = low risk of bias, M = moderate risk of bias, MA = meta-analysis, OR = odds ratio, Outc. Meas = outcome measurement, Prog. Meas. = prognostic factor measurement, Pros = prospective, RA = rheumatoid arthritis, Rand. Seq. = random sequence generation, SD = standard deviation, Stats. = statistical analysis, Study Pop. = study population, VAS = visual analogue scale

## Supplementary table 123 – Fatigue outcomes from observational studies in RA

Table – Fatigue (RA), results and quality assessment of observational studies

| Study (date) [study type]                             | Results                                                                                                                                                                                                                                                                                                                                                                                               | Weight associated with outcome | Study Pop. | Attr. | Prog. Meas. | Outc. Meas. | Conf. | Stats. |
|-------------------------------------------------------|-------------------------------------------------------------------------------------------------------------------------------------------------------------------------------------------------------------------------------------------------------------------------------------------------------------------------------------------------------------------------------------------------------|--------------------------------|------------|-------|-------------|-------------|-------|--------|
| Feldthusen (2016) [Prospective cohort] <sup>344</sup> | <u>BRAF-MDQ total, regression coefficient (95% CI) [adjusted]</u><br>BMI 0.412 (-0.00976, 0.834)<br><u>BRAF-MDQ physical, regression coefficient (95% CI) [adjusted]</u><br>0.179 (-0.00823, 0.367)<br><u>BRAF-MDQ living, regression coefficient (95% CI) [adjusted]</u><br>0.153 (0.00885, 0.298)<br><u>BRAF-MDQ emotion, regression coefficient (95% CI) [adjusted]</u><br>0.0734 (-0.0346, 0.181) | ✓                              | L          | H     | L           | L           | L     | M      |

Attr. = attrition, BL = Baseline, BMI = body mass index, BRAF-MDQ = Bristol Rheumatoid Arthritis Fatigue – Multidimensional Assessment Questionnaire, CI = confidence interval, Conf. = confounding, L = low risk of bias, M = moderate risk of bias, Outc. Meas = outcome measurement, Prog. Meas. = prognostic factor measurement, Pros = prospective, RA = rheumatoid arthritis, Rand. Seq. = random sequence generation, Stats. = statistical analysis, Study Pop. = study population

## Supplementary table 124 – Mental health outcomes from observational studies in RA

Table – Mental health (RA), results and quality assessment of observational studies

| Study (date) [study type]                             | Results                                                                                  | Weight associated with outcome | Study Pop. | Attr. | Prog. Meas. | Outc. Meas. | Conf. | Stats. |
|-------------------------------------------------------|------------------------------------------------------------------------------------------|--------------------------------|------------|-------|-------------|-------------|-------|--------|
| Kanecki (2013)<br>[Prospective cohort] <sup>357</sup> | <u>SF36 mental health component, correlation coef, p</u><br>BMI: r -0.31 p<0.05          | ✓                              | L          | L     | L           | L           | H     | H      |
| Cohen (2006)<br>[Prospective cohort] <sup>370</sup>   | <u>AIMS affect scale, OR (95%CI)</u><br>BMI 4.31 (1.59, 11.7) [cut-points not specified] | ✓                              | L          | M     | L           | L           | M     | M      |

AIMS = Arthritis Impact Measurement Scales, Attr. = attrition, BMI = body mass index, CI = confidence interval, Conf. = confounding, L = low risk of bias, M = moderate risk of bias, OR = odds ratio, Outc. Meas = outcome measurement, Prog. Meas. = prognostic factor measurement, Pros = prospective, RA = rheumatoid arthritis, Rand. Seq. = random sequence generation, Stats. = statistical analysis, Study Pop. = study population

## Supplementary table 125 – Radiographic outcomes from observational studies in RA

Table – Radiographic damage (RA), results and quality assessment of observational studies

| Study (date) [study type]                                 | Results                                                                                                                                                                                                                           | Weight associated with outcome | Study Pop. | Attr. | Prog. Meas. | Outc. Meas. | Conf. | Stats. |
|-----------------------------------------------------------|-----------------------------------------------------------------------------------------------------------------------------------------------------------------------------------------------------------------------------------|--------------------------------|------------|-------|-------------|-------------|-------|--------|
| Lechtenboehmer (2019) [Prospective cohort] <sup>327</sup> | <u>OA progression, OR (95%) [adjusted]</u><br>BMI cont: 1.03 (1.00, 1.06)                                                                                                                                                         | ✓                              | L          | L     | L           | L           | L     | L      |
| Rydell (2018) [Prospective cohort] <sup>330</sup>         | <u>Rapid radiographic progression up to 5 years, OR (95% CI)</u><br>BMI per SD: 0.67 (0.44, 1.03) [adj]<br>normal BMI: ref<br>obese: 0.07 (0.01, 0.58)<br>obese or overweight: 0.27 (0.12, 0.63)<br>overweight: 0.36 (0.15, 0.84) | ✓                              | L          | M     | L           | L           | L     | M      |
| van der Heijde (2018) [Prospective cohort] <sup>334</sup> | <u>Structural damage progression, OR (95% CI) [adjusted]</u><br>Baseline BMI: 0.94 (0.89, 0.99)                                                                                                                                   | ✓                              | L          | L     | L           | L           | L     | M      |
| Joo (2017) [Prospective cohort] <sup>339</sup>            | <u>Joint damage, OR (95% CI)</u><br>BMI 0.91 (0.84, 0.99) [unadjusted]<br>BMI 0.88 (0.80, 0.97) [adjusted]                                                                                                                        | ✓                              | L          | M     | L           | L           | L     | M      |
| Levitsky (2017) [Prospective cohort] <sup>340</sup>       | <u>Radiographic progression bl-24 months, OR (95% CI)</u><br>obese: 0.46 (0.22, 0.99) [unadjusted] / 0.37 (0.13, 1.1) [adjusted]                                                                                                  | ✓                              | L          | M     | L           | L           | L     | M      |
| Ramirez (2017) [Prospective cohort] <sup>343</sup>        | <u>erosion score, change BL-12 months, reg coef [adjusted]</u><br>"higher" BMI: 0.1 – no confidence interval reported                                                                                                             | ✓                              | L          | L     | L           | L           | M     | M      |
| de Rooy (2011) [Prospective cohort] <sup>361</sup>        | <u>Rate of joint progression, exponentiated regression coefficient (95%CI) [adjusted]</u><br>BMI: 0.96 (0.94, 0.98)                                                                                                               | ✓                              | L          | M     | M           | L           | L     | L      |
| Liao (2011) [Prospective cohort] <sup>363</sup>           | <u>Erosions at 2 years, mean (SD) BL BMI</u><br>erosion: 26.5 (5.3)<br>no erosion: 27.4 (5.9) p=0.34                                                                                                                              | ✗                              | L          | L     | L           | L           | H     | H      |

Attr. = attrition, BL = baseline, BMI = body mass index, CI = confidence interval, Conf. = confounding, L = low risk of bias, M = moderate risk of bias, OA = osteoarthritis, OR = odds ratio, Outc. Meas = outcome measurement, Prog. Meas. = prognostic factor measurement, Pros = prospective, RA = rheumatoid arthritis, Rand. Seq. = random sequence generation, SD = standard deviation, Stats. = statistical analysis, Study Pop. = study population

Table – Radiographic damage (RA), results and quality assessment of observational studies

| Study (date) [study type]                                       | Results                                                                                                                                                                                              | Weight associated with outcome | Study Pop. | Attr. | Prog. Meas. | Outc. Meas. | Conf. | Stats. |
|-----------------------------------------------------------------|------------------------------------------------------------------------------------------------------------------------------------------------------------------------------------------------------|--------------------------------|------------|-------|-------------|-------------|-------|--------|
| Tekaya (2011) [Prospective cohort] <sup>364</sup>               | <u>Sharp score, mean (SD)</u><br>Obese: 64.97 (82.28)<br>Non obese: 113.64 (122.62) p=0.032                                                                                                          | ✓                              | L          | M     | M           | L           | L     | L      |
| Hashimoto (2009) [Prospective cohort] <sup>368</sup>            | <u>Total sharp score, mean change per unit BMI (p value) [adjusted]</u><br>BMI: -0.92 (<0.01)<br><u>Bone erosion progression, mean change per unit BMI (p value) [adjusted]</u><br>BMI: -0.48 (0.02) | ✓                              | L          | L     | L           | L           | L     | M      |
| van der Helm-van Mil (2008) [Prospective cohort] <sup>369</sup> | <u>Sharp score, regression coefficient (SE)</u><br>Leiden: BMI continuous = -0.65 (0.29), p=0.026<br>BesT: BMI continuous = -0.94 (0.29) p<0.001                                                     | ✓                              | L          | M     | L           | L           | M     | M      |

Attr. = attrition, BMI = body mass index, CI = confidence interval, Conf. = confounding, L = low risk of bias, M = moderate risk of bias, Outc. Meas = outcome measurement, Prog. Meas. = prognostic factor measurement, RA = rheumatoid arthritis, Rand. Seq. = random sequence generation, SD = standard deviation, SE = standard error, Stats. = statistical analysis, Study Pop. = study population

## Supplementary table 126 – Bone mineral density outcomes from observational studies in RA

Table – Bone mineral density (RA), results and quality assessment of observational studies

| Study (date) [study type]                      | Results                                                                                                                                                                        | Weight associated with outcome | Study Pop. | Attr. | Prog. Meas. | Outc. Meas. | Conf. | Stats. |
|------------------------------------------------|--------------------------------------------------------------------------------------------------------------------------------------------------------------------------------|--------------------------------|------------|-------|-------------|-------------|-------|--------|
| Pye (2010) [Prospective cohort] <sup>365</sup> | <u>Femoral neck BMD, regression coefficient (95% CI)</u><br>BMI: 0.008 (0.002, 0.014)<br><u>Lumbar spine BMD, regression coefficient (95% CI)</u><br>BMI: 0.008 (0.001, 0.016) | ✓                              | L          | L     | L           | L           | M     | M      |

Attr. = attrition, BMI = body mass index, BMD = bone mineral density, BMI = body mass index, CI = confidence interval, Conf. = confounding, L = low risk of bias, M = moderate risk of bias, Outc. Meas = outcome measurement, Prog. Meas. = prognostic factor measurement, Pros = prospective, RA = rheumatoid arthritis, Rand. Seq. = random sequence generation,, Stats. = statistical analysis, Study Pop. = study population

## Supplementary table 127 – Joint space narrowing outcomes from observational studies in RA

Table – Joint space narrowing (RA), results and quality assessment of observational studies

| Study (date) [study type]                            | Results                                                                                       | Weight associated with outcome | Study Pop. | Attr. | Prog. Meas. | Outc. Meas. | Conf. | Stats. |
|------------------------------------------------------|-----------------------------------------------------------------------------------------------|--------------------------------|------------|-------|-------------|-------------|-------|--------|
| Hashimoto (2009) [Prospective cohort] <sup>368</sup> | <u>Joint space narrowing progression, mean change per unit BMI (p value)</u><br>-0.46 (<0.01) | ✓                              | L          | L     | L           | L           | L     | M      |

Attr. = attrition, BMI = body mass index, CI = confidence interval, Conf. = confounding, L = low risk of bias, M = moderate risk of bias, Outc. Meas = outcome measurement, Prog. Meas. = prognostic factor measurement, Pros = prospective, RA = rheumatoid arthritis, Rand. Seq. = random sequence generation, Stats. = statistical analysis, Study Pop. = study population,

## Supplementary table 128 – CRP outcomes from observational studies in RA

Table – CRP (RA), results and quality assessment of observational studies

| Study (date) [study type]                                         | Results                                                                                                                                      | Weight associated with outcome | AMSTAR2  | Study Pop. | Attr. | Prog. Meas. | Outc. Meas. | Conf. | Stats. |
|-------------------------------------------------------------------|----------------------------------------------------------------------------------------------------------------------------------------------|--------------------------------|----------|------------|-------|-------------|-------------|-------|--------|
| Liu (2017) [MA] <sup>322</sup>                                    | <u>CRP</u><br>2/4 studies reported higher CRP in obese compared to non-obese patients                                                        | ✓                              | Moderate |            |       |             |             |       |        |
| D'Agostino (2017) [Prospective cohort] <sup>336</sup> (abatacept) | <u>CRP, change BL-6 mths, mean (SD)</u><br>BMI <25: -2.0 (0.1)<br>25-30: -1.5 (0.1)<br>≥30 -0.9 (0.1) – statistically significant difference | ✓                              |          | M          | L     | L           | L           | H     | M      |
| Tekaya (2011) [Prospective cohort] <sup>364</sup>                 | <u>CRP</u><br>Obese: 26.96 (31.07)<br>Non obese: 26.21 (32.04) p=0.91                                                                        | ✘                              |          | L          | M     | M           | L           | L     | L      |
| George (2017) [Prospective cohort] <sup>337</sup>                 | <u>CRP ≤1 at week 24, OR (95% CI) [adjusted]</u><br>Obese vs not: 0.44 (0.23, 0.84)                                                          | ✓                              |          | L          | L     | L           | L           | L     | M      |
| Skoldstam (2005) [Prospective cohort] <sup>373</sup>              | <u>Univariate OR between reduction and no reduction of body weight with outcome:</u><br>Dichotomous CRP: 2.85 (p=0.03)                       | ✓                              |          | L          | L     | L           | L           | H     | H      |

AMSTAR2 = Assessing the Methodological Quality of Systematic Reviews, Attr. = attrition, BL = baseline, BMI = body mass index, CI = confidence interval, Conf. = confounding, CRP = C-reactive protein, L = low risk of bias, M = moderate risk of bias, MA = meta-analysis, OR = odds ratio, Outc. Meas. = outcome measurement, Prog. Meas. = prognostic factor measurement, Pros = prospective, RA = rheumatoid arthritis, Rand. Seq. = random sequence generation, SD = standard deviation, Stats. = statistical analysis, Study Pop. = study population,

## Supplementary table 129 – ESR outcomes from observational studies in RA

Table – ESR (RA), results and quality assessment of observational studies

| Study (date) [study type]                            | Results                                                                                                                | Weight associated with outcome | AMSTAR2  | Study Pop. | Attr. | Prog. Meas. | Outc. Meas. | Conf. | Stats. |
|------------------------------------------------------|------------------------------------------------------------------------------------------------------------------------|--------------------------------|----------|------------|-------|-------------|-------------|-------|--------|
| Liu (2017) [MA] <sup>322</sup>                       | <u>ESR</u><br>3/4 studies reported higher ESR in obese patients vs non-obese                                           | ✓                              | Moderate |            |       |             |             |       |        |
| Skoldstam (2005) [Prospective cohort] <sup>373</sup> | <u>Univariate OR between reduction and no reduction of body weight with outcome:</u><br>Dichotomous ESR: 1.64 (p=0.29) | ✘                              |          | L          | L     | L           | L           | H     | H      |

AMSTAR2 = Assessing the Methodological Quality of Systematic Reviews, Attr. = attrition, CI = confidence interval, Conf. = confounding, ESR = erythrocyte sedimentation rate, H = high, L = low risk of bias, M = moderate risk of bias, MA = meta-analysis, OR = odds ratio, Outc. Meas = outcome measurement, Prog. Meas. = prognostic factor measurement, Pros = prospective, RA = rheumatoid arthritis, Rand. Seq. = random sequence generation, Stats. = statistical analysis, Study Pop. = study population



## Supplementary table 130 – Comorbidity outcomes from observational studies in RA

Table – Comorbidity (RA), results and quality assessment of observational studies

| Study (date) [study type]                                | Results                                                                                                                                                                                   | Weight associated with outcome | AMSTAR2  | Study Pop. | Attr. | Prog. Meas. | Outc. Meas. | Conf. | Stats. |
|----------------------------------------------------------|-------------------------------------------------------------------------------------------------------------------------------------------------------------------------------------------|--------------------------------|----------|------------|-------|-------------|-------------|-------|--------|
| Baghdadi (2015) [MA] <sup>324</sup>                      | <u>Cardiovascular morbidity</u><br>Meta-risk ratio: 1.16 (95% CI 1.03, 1.29)                                                                                                              | ✓                              | Moderate |            |       |             |             |       |        |
| Hirose (2019) [Prospective cohort] <sup>326</sup>        | <u>MAC-PD, OR (95% CI) [adjusted]</u><br>BMI <18 vs BMI ≥18: 4.24 (1.30, 13.84)                                                                                                           | ✓                              |          | L          | L     | L           | L           | M     | M      |
| Tantayakom (2016) [Prospective cohort] <sup>348</sup>    | <u>Metabolic syndrome, OR (95%CI), [adjusted]</u><br>BMI: 1.20 (1.1-1.3)                                                                                                                  | ✓                              |          | L          | M     | L           | L           | M     | M      |
| Kim (2014) [Prospective cohort] <sup>352</sup>           | <u>Predictors of tuberculosis occurrence, OR (95% CI)</u><br>RA: BMI <22: 1.08 (0.17, 6.87)                                                                                               | ✗                              |          | L          | L     | L           | L           | L     | M      |
| Ochi (2014) [Prospective cohort] <sup>353</sup>          | <u>Distal radial fracture, HR (95% CI) [adjusted]</u><br>BMI continuous: 1.11 (1.03, 1.19)                                                                                                | ✓                              |          | L          | L     | L           | L           | L     | M      |
| Dirven (2012) [Prospective cohort] <sup>358</sup>        | <u>Reporting influenza, OR (95% CI) [adjusted]</u><br>BMI: 1.06 (1.0, 1.1)                                                                                                                | ✓                              |          | L          | M     | L           | L           | L     | M      |
| Verstappen (2010) [Prospective cohort] <sup>366</sup>    | <u>OR (95%CI) MTX related adverse events</u><br>Unadjusted: OR 1.074 per unit BMI (0.96, 1.20)<br>Adjusted: OR 1.076 per unit BMI (0.95, 1.21)                                            | ✗                              |          | L          | L     | L           | L           | L     | M      |
| Furuya (2009) [Prospective cohort] <sup>367</sup>        | <u>≥1 fall, OR (95% CI) [adjusted]</u><br>BMI 1.05 (1.02, 1.08)<br><u>≥2 falls, OR (95% CI) [adjusted]</u><br>BMI 1.08 (1.02, 1.15)                                                       | ✓                              |          | L          | L     | L           | L           | L     | M      |
| Mori (2017) [Retrospective cohort] <sup>378</sup>        | <u>Hospitalised infection, HR (95% CI) [adjusted]</u><br>BMI <18.5 vs BMI ≥18.5: 2.55 (1.57, 4.14)                                                                                        | ✓                              |          | L          | L     | L           | L           | L     | M      |
| Gonzalez (2008) [Retrospective cohort] <sup>383</sup>    | <u>Combined cardiovascular outcome, HR (95% CI) [adjusted]</u><br>Time-varying high BMI ≥30 vs other BMI: 1.27 (0.93, 1.74)<br>Time-varying low BMI (<20) vs other BMI: 1.58 (1.19, 2.10) | ✓                              |          | L          | L     | L           | L           | L     | L      |
| Kent (2004) [Retrospective cohort] <sup>384</sup>        | <u>Abnormal AST [unadjusted]</u><br>BMI - not significant                                                                                                                                 | ✗                              |          | M          | L     | L           | L           | M     | M      |
| Nadareishvili (2008) [Nested case control] <sup>83</sup> | <u>First stroke, OR (95% CI)</u><br>BMI continuous: 1.00 (0.95, 1.05)                                                                                                                     | ✗                              |          | L          | M     | L           | L           | L     | M      |

AMSTAR2 = Assessing the Methodological Quality of Systematic Reviews, Attr. = attrition, AST = aspartate transaminase, BMI = body mass index, CI = confidence interval, Conf. = confounding, HR = hazard ratio, L = low risk of bias, M = moderate risk of bias, MAC-PD = mycobacterium avium complex pulmonary disease, MTX = methotrexate, OR = odds ratio, Outc. Meas = outcome measurement, Prog. Meas. = prognostic factor measurement, Pros = prospective, RA = rheumatoid arthritis, Rand. Seq. = random sequence generation, SD = standard deviation, Stats. = statistical analysis, Study Pop. = study population

## Supplementary table 131 – Drug discontinuation outcomes from observational studies in RA

Table – Drug discontinuation (RA), results and quality assessment of observational studies

| Study (date) [study type]                                             | Results                                                                                                                                                                                                                                                                                   | Weight associated with outcome | Study Pop. | Attr. | Prog. Meas. | Outc. Meas. | Conf. | Stats. |
|-----------------------------------------------------------------------|-------------------------------------------------------------------------------------------------------------------------------------------------------------------------------------------------------------------------------------------------------------------------------------------|--------------------------------|------------|-------|-------------|-------------|-------|--------|
| Iannone (2017)<br>[Prospective cohort] <sup>338</sup><br>(abatacept)  | <u>Abatacept discontinuation, HR (95% CI) [adjusted]</u><br>Normal weight: ref<br>Overweight: 1.03 (0.89, 1.19)<br>obese: 1.08 (0.89, 1.30)<br>Severely obese: 0.93 (0.72, 1.19)                                                                                                          | ✘                              | L          | H     | L           | L           | L     | M      |
| Mariette (2017)<br>[Prospective cohort] <sup>341</sup><br>(abatacept) | <u>Abatacept discontinuation, HR (95% CI) [adjusted]</u><br>BMI <25: ref<br>BMI 25-30: 0.46 (0.22, 0.99)<br>BMI ≥30: 0.69 (0.34, 1.41)                                                                                                                                                    | ✘                              | L          | L     | L           | L           | L     | M      |
| McWilliams (2016)<br>[Prospective cohort] <sup>347</sup>              | <u>Discontinue TNF at 1 year, OR (95% CI)</u><br>BMI per category increase: 0.98 (0.93, 1.04)                                                                                                                                                                                             | ✘                              | L          | M     | L           | L           | L     | L      |
| Rashid (2016)<br>[Prospective cohort] <sup>379</sup>                  | <u>Switching bDMARD, OR (95% CI) [adjusted]</u><br>normal BMI: ref<br>overweight: 1.20 (0.81, 1.77)<br>obese: 1.51 (1.04, 2.19)                                                                                                                                                           | ✓                              | L          | L     | L           | L           | L     | M      |
| Iannone (2015)<br>[Prospective cohort] <sup>350</sup>                 | <u>Discontinuing first anti-TNF, HR (95% CI) [adjusted]</u><br>Normal weight: ref<br>Underweight: 1.22 (0.79, 1.88)<br>Obese: 1.63 (1.02, 2.62)<br><u>Discontinue second biologic, HR (95% CI) [adjusted]</u><br>Normal: ref<br>Underweight: 1.56 (0.57, 4.27)<br>Obese: 2.90 (1.0, 8.45) | ✓                              | L          | L     | L           | L           | L     | L      |
| Verstappen (2010)<br>[Prospective cohort] <sup>366</sup>              | <u>Withdrawal of MTX due to AEs OR (95% CI)</u><br>Adjusted: OR 1.207 per unit BMI (1.02, 1.44)                                                                                                                                                                                           | ✓                              | L          | L     | L           | L           | L     | M      |
| Hoekstra (2003)<br>[Prospective cohort] <sup>375</sup>                | <u>MTX withdrawal due to toxicity, OR (95% CI) [adjusted]</u><br>BMI: 1.07 (1.01, 1.14)                                                                                                                                                                                                   | ✓                              | L          | L     | L           | L           | L     | M      |
| Kent (2004)<br>[Retrospective cohort] <sup>384</sup>                  | <u>Discontinuing MTX, mean BMI (SD)</u><br>Discontinued: BMI 32.1 (6.9)<br>Didn't discontinue: 28.5 (6.0) p<0.03                                                                                                                                                                          | ✓                              | M          | L     | L           | L           | M     | M      |

AEs = adverse events, Attr. = attrition, BMI = body mass index, CI = confidence interval, Conf. = confounding, H = high, HR = hazard ratio, L = low risk of bias, M = moderate risk of bias, MTX = methotrexate, OR = odds ratio, Outc. Meas = outcome measurement, Prog. Meas. = prognostic factor measurement, Pros = prospective, RA = rheumatoid arthritis, Rand. Seq. = random sequence generation, SD = standard deviation, Stats. = statistical analysis, Study Pop. = study population, TNF = tumour necrosis factor

## Supplementary table 132 – Mortality outcomes from observational studies in RA

Table – Death (RA), results and quality assessment of observational studies

| Study (date) [study type]                             | Results                                                                                                                                                                                                                                                                                                                                                                                                                                                                                                                                                                                                                                                                                                                                                                                                                                                                                                                                                                    | Weight associated with outcome | Study Pop. | Attr. | Prog. Meas. | Outc. Meas. | Conf. | Stats. |
|-------------------------------------------------------|----------------------------------------------------------------------------------------------------------------------------------------------------------------------------------------------------------------------------------------------------------------------------------------------------------------------------------------------------------------------------------------------------------------------------------------------------------------------------------------------------------------------------------------------------------------------------------------------------------------------------------------------------------------------------------------------------------------------------------------------------------------------------------------------------------------------------------------------------------------------------------------------------------------------------------------------------------------------------|--------------------------------|------------|-------|-------------|-------------|-------|--------|
| Baker (2019)<br>[Prospective cohort] <sup>325</sup>   | <u>Mortality, BMI categories aged 30, HR (95% CI) [adjusted]</u><br>BMI <18.5: 1.01 (0.75, 1.35)<br>BMI 18.5-25: ref<br>BMI 25-30: 1.19 (1.04, 1.36)<br>BMI >30: 2.00 (1.65, 2.42)<br><u>Mortality, BMI categories at baseline, HR (95% CI) [adjusted]</u><br>BMI <18.5: 1.37 (1.00, 1.88)<br>BMI 18.5-25: ref<br>BMI 25-30: 0.99 (0.87, 1.12)<br>BMI >30: 1.34 (1.18, 1.53)                                                                                                                                                                                                                                                                                                                                                                                                                                                                                                                                                                                               | ✓                              | L          | L     | L           | L           | L     | M      |
| England (2018)<br>[Prospective cohort] <sup>328</sup> | <u>Mortality: CVD / cancer / respiratory, time-varying BMI HR (95% CI) [adjusted]</u><br><20: 1.30 (0.34, 5.00) / 1.43 (0.65, 3.13) / 2.93 (1.28, 6.67)<br>20-25: ref<br>>25-30: 0.59 (0.38, 0.91) / 0.87 (0.40, 1.86) / 0.93 (0.57, 1.52)<br>>30: 0.73 (0.31, 1.73) / 0.71 (0.38, 1.33) / 0.50 (0.23, 1.11)<br><u>Mortality: CVD / cancer / respiratory, time-varying weight loss rate HR (95% CI) [adjusted]</u><br>none: ref<br><2: 1.01 (0.77, 1.33) / 0.82 (0.54, 1.25) / 0.85 (0.50, 1.43)<br>2-3: 1.29 (0.68, 2.45) / 1.25 (0.72, 2.17) / 0.92 (0.44, 1.96)<br>>3: 2.27 (1.61, 3.19) / 2.36 (1.11, 5.01) / 1.30 (0.75, 2.26)<br><u>Mortality: CVD / cancer / respiratory, time-varying percentage weight loss rate HR (95% CI) [adjusted]</u><br>none: ref<br><5%: 1.37 (1.04, 1.81) / 0.92 (0.47, 1.83) / 1.18 (0.75, 1.88)<br>5-10%: 1.39 (1.00, 1.94) / 1.30 (0.76, 2.23) / 1.86 (1.07, 3.25)<br>>10%: 2.31 (1.06, 5.01) / 1.90 (1.00, 3.62) / 2.19 (1.30, 3.70) | ✓                              | M          | M     | L           | L           | L     | M      |

Attr. = attrition, BMI = body mass index, CI = confidence interval, Conf. = confounding, CVD = cardiovascular disease, L = low risk of bias, HR = hazard ratio, M = moderate risk of bias, Outc. Meas = outcome measurement, Prog. Meas. = prognostic factor measurement, Pros = prospective, RA = rheumatoid arthritis, Rand. Seq. = random sequence generation, Stats. = statistical analysis, Study Pop. = study population

Table – Death (RA), results and quality assessment of observational studies

| Study (date) [study type]                            | Results                                                                                                                                                                                                                                                                                                                                                                                                                                                                                                                                                                                     | Weight associated with outcome | Study Pop. | Attr. | Prog. Meas. | Outc. Meas. | Conf. | Stats. |
|------------------------------------------------------|---------------------------------------------------------------------------------------------------------------------------------------------------------------------------------------------------------------------------------------------------------------------------------------------------------------------------------------------------------------------------------------------------------------------------------------------------------------------------------------------------------------------------------------------------------------------------------------------|--------------------------------|------------|-------|-------------|-------------|-------|--------|
| Sparks (2018)<br>[Prospective cohort] <sup>333</sup> | <u>Multivariable HR (95%CI) death:</u><br>Severe loss: 2.78 (1.58, 4.89)<br>Moderate loss: 1.35 (0.76, 2.38)<br>Mild loss: 1.78 (1.25, 2.54)<br>stable=ref<br>Mild gain: 1.21 (0.88, 1.67)<br>Moderate gain: 1.05 (0.63, 1.75)<br>Severe gain: 1.45 (0.69, 3.07)                                                                                                                                                                                                                                                                                                                            | ✓                              | L          | L     | L           | L           | L     | M      |
| Baker (2015)<br>[Prospective cohort] <sup>349</sup>  | <u>Mortality, HR (95% CI), multivariable</u><br>model 1:<br>BMI <20: 3.12 (2.12, 4.57)<br>BMI 20-25: ref<br>BMI >25-30: 0.91 (0.67, 1.23)<br>BMI >30: 0.87 (0.61, 1.24)<br>>1 unit per year change vs <1: 1.99 (1.53, 2.59)<br>Model 2:<br>BMI <20: 2.31 (1.50, 3.57)<br>BMI 20-25: ref<br>BMI >25-30: 0.92 (0.66, 1.29)<br>BMI >30: 0.74 (0.49, 1.11)<br>>1 unit per year change vs <1: 1.81 (1.36, 2.41)<br><u>Mortality, rate of change, HR (95% CI)</u><br>no weight loss: ref<br>0-<2 per year: 1.12 (0.85, 1.49)<br>2-3 per year: 1.65 (1.09, 2.50)<br>>3 per year: 2.49 (1.73, 3.57) | ✓                              | M          | L     | L           | L           | L     | M      |
| Wolfe (2012)<br>[Prospective cohort] <sup>360</sup>  | <u>All-cause mortality for all ages (RR (95%CI) [adjusted]</u><br>Underweight = 1.9 (1.7, 2.3)<br>Normal = reference<br>Overweight = 0.8 (0.8, 0.9)<br>Obese = 0.8 (0.7, 0.8)<br><u>All-cause mortality, &lt;50 / 50-70 / &gt;70 years, RR (95% CI) [adjusted]</u><br>Underweight: 1.6 (0.7, 3.6) / 2.2 (1.7, 2.9) / 1.6 (1.3, 2.0)<br>Normal: ref<br>Overweight: 0.8 (0.5, 1.2) / 0.8 (0.8, 1.0) / 0.8 (0.7, 0.9)<br>Obese: 1.6 (1.1, 2.2) / 1.0 (0.9, 1.8) / 0.9 (0.7, 1.0)                                                                                                               | ✓                              | L          | L     | L           | L           | L     | M      |

Model 1 includes age, female sex, white race, current body mass index (BMI) category, weight loss over the previous interval (versus no weight loss), use of methotrexate, prednisone, or tumor necrosis factor (TNF) inhibitor, presence of diabetes, cardiovascular disease, chronic kidney disease, or malignancy, and active smoking Model 2 includes the variables in model 1 but with the addition of the natural log-transformed C-reactive protein (CRP) level and the Multidimensional Health Assessment Questionnaire (MDHAQ)

Attr. = attrition, BMI = body mass index, CI = confidence interval, Conf. = confounding, HR = hazard ratio, L = low risk of bias, M = moderate risk of bias, Outc. Meas = outcome measurement, Prog. Meas. = prognostic factor measurement, Pros = prospective, RA = rheumatoid arthritis, Rand. Seq. = random sequence generation, RR = risk ratio, SD = standard deviation, Stats. = statistical analysis, Study Pop. = study population

Table – Death (RA), results and quality assessment of observational studies

| Study (date) [study type]                                  | Results                                                                                                                                                                                                                                                                                                | Weight associated with outcome | Study Pop. | Attr. | Prog. Meas. | Outc. Meas. | Conf. | Stats. |
|------------------------------------------------------------|--------------------------------------------------------------------------------------------------------------------------------------------------------------------------------------------------------------------------------------------------------------------------------------------------------|--------------------------------|------------|-------|-------------|-------------|-------|--------|
| Escalante (2005) [Prospective cohort] <sup>371</sup>       | <u>Mortality rate per 100 person years,(95% CI) [adjusted]</u><br><20: 6.8 (4.2, 11.1)<br>20 to <25: 3.3 (2.3, 4.9)<br>25 to <30: 2.1 (1.4, 3.0)<br>≥30: 1.4 (0.1, 2.2)<br><u>Mortality, HR (95% CI) [adjusted]</u><br>BMI HR 0.97 (0.94, 1.00)                                                        | ✓                              | L          | L     | L           | L           | L     | M      |
| Maradit-Kremers (2005) [Prospective cohort] <sup>372</sup> | <u>Cardiovascular death, HR (95% CI) [adjusted]</u><br>BMI ≥30: 0.93 (0.60, 1.45)<br>BMI <20: 1.80 (1.27, 2.54)                                                                                                                                                                                        | ✓                              | L          | L     | L           | L           | L     | M      |
| Maradit-Kremers (2004) [Prospective cohort] <sup>374</sup> | <u>Cardiovascular mortality, HR (95% CI) [adjusted]</u><br>Normal BMI BL - normal FU: ref<br>Low BMI BL - low/normal FU: 3.06 (1.99, 4.69)<br>Normal BMI BL - low BMI FU: 2.09 (1.50, 2.92)<br>Normal BMI BL - high BMI FU: 1.33 (0.87, 2.02)<br>High BMI BL - high / normal BMI FU: 0.95 (0.57, 1.61) | ✓                              | L          | L     | L           | L           | L     | L      |

Attr. = attrition, BL = baseline, BMI = body mass index, CI = confidence interval, Conf. = confounding, FU = follow-up, HR = hazard ratio, L = low risk of bias, M = moderate risk of bias, Outc. Meas = outcome measurement, Prog. Meas. = prognostic factor measurement, RA = rheumatoid arthritis, SD = standard deviation, Stats. = statistical analysis, Study Pop. = study population

## Supplementary table 133 – Description of studies of assessing weight and outcomes in SLE

Table – Systemic Lupus Erythematosus, description of included studies

| Author (date) [country]                           | Study design | Inclusion criteria                                                                                                                                                  | Exposure detail                                                                                                                                                                                                                                                                                                                                                                              | N   | Age, mean (SD) years | N (%) female | Funders                                                                                                                                                                                                                       |
|---------------------------------------------------|--------------|---------------------------------------------------------------------------------------------------------------------------------------------------------------------|----------------------------------------------------------------------------------------------------------------------------------------------------------------------------------------------------------------------------------------------------------------------------------------------------------------------------------------------------------------------------------------------|-----|----------------------|--------------|-------------------------------------------------------------------------------------------------------------------------------------------------------------------------------------------------------------------------------|
| Figueiredo-Braga (2018) [Portugal] <sup>385</sup> | Pros. Cohort | ACR SLE criteria                                                                                                                                                    | BMI – continuous                                                                                                                                                                                                                                                                                                                                                                             | 70  | 44.31 (9.9)          | 70 (100)     | <b>Government</b> (Fulbright commission: Portugal)                                                                                                                                                                            |
| Jacobs (2013) [The Netherlands] <sup>386</sup>    | Pros. Cohort | ACR SLE criteria                                                                                                                                                    | BMI – continuous                                                                                                                                                                                                                                                                                                                                                                             | 126 | 39.0 (12.2)          | 89.7%        | <b>Not reported</b> – Authors declared no conflict of interest                                                                                                                                                                |
| Katz (2011) [USA] <sup>387</sup>                  | Pros. Cohort | University of California at San Francisco (UCSF) Lupus Outcomes Study (LOS) - SLE diagnosis confirmed by medical record review<br>Exclusions: underweight <18.5 BMI | BMI categories: obesity = 1) BMI ≥30 and 2) BMI 26.8 kg/m <sup>2</sup> , a revised obesity criterion recently proposed for women with SLE based on data regarding body composition from DXA analyses of a subset of these women. This lower criterion was found to correspond better with the percentage of body fat associated with threshold of obesity than a BMI of 30 kg/m <sup>2</sup> | 716 | 48.1 (12.6)          | 716 (100)    | <b>Government</b> (NIH)                                                                                                                                                                                                       |
| Chaiamnuay (2007) [USA] <sup>388</sup>            | Pros. Cohort | ACR SLE criteria, symptom duration ≤5 years                                                                                                                         | BMI – continuous                                                                                                                                                                                                                                                                                                                                                                             | 614 | 37.2 (12.9)          | 90%          | <b>Government</b> (National Institute of Arthritis and Musculoskeletal and Skin Diseases, National Center for Research Resources), <b>University</b> (University of Alabama Birmingham), <b>Industry</b> (Rheuminations, Inc) |
| Chaiamnuay (2007) [USA] <sup>389</sup>            | Pros. Cohort | LUMINA study – ACR SLE criteria, symptom duration <5 years                                                                                                          | BMI – continuous                                                                                                                                                                                                                                                                                                                                                                             | 488 | 34.9 (11.7)          | 90%          | <b>Government</b> (National Institute of Arthritis and Musculoskeletal and Skin Diseases, National Center for Research Resources), <b>University</b> (University of Alabama Birmingham), <b>Industry</b> (Rheuminations, Inc) |
| Uaratanawong (2004) [Thailand] <sup>390</sup>     | Pros. Cohort | Pre-monopause, prednisolone treated SLE                                                                                                                             | BMI                                                                                                                                                                                                                                                                                                                                                                                          | 106 | 31.7 (7.5)           | 106 (100)    | <b>Not reported</b>                                                                                                                                                                                                           |

ACR = American College of Rheumatology, BMI = body mass index, N = number, NIH = National Institutes of Health, pros. = prospective, Retro. = retrospective, SD = standard deviation, SLE = systemic lupus erythematosus, USA = United States of America

*Table – Systemic Lupus Erythematosus, description of included studies*

| Author (date)<br>[country]              | Study design | Inclusion criteria                                   | Exposure detail                                           | N   | Age, mean (SD) years                         | N (%) female | Funders                                                              |
|-----------------------------------------|--------------|------------------------------------------------------|-----------------------------------------------------------|-----|----------------------------------------------|--------------|----------------------------------------------------------------------|
| Bruce (1998)<br>[Canada] <sup>391</sup> | Pros. Cohort | University of Toronto Lupus Database                 | BMI categories:<br>Obese<br>Non-obese                     | 24  | 50 (12.2) at first event                     | 18 (75.0)    | <b>Charity</b> (Ontario Lupus Association, Arthritis Society Canada) |
| Petri (1992)<br>[USA] <sup>392</sup>    | Pros. Cohort | John Hopkins Lupus Cohort, clinical diagnosis of SLE | BMI categories:<br>Obese= >27.8 in men and >27.3 in women | 229 | CAD+:<br>47.1 (11.3)<br>CAD-:<br>34.7 (11.2) | 209 (91.3)   | <b>Government</b> (NIH),<br><b>University</b> (John Hopkins),        |

BMI = body mass index, N = number, NIH = National Institutes of Health, pros. = prospective, SD = standard deviation, SLE = systemic lupus erythematosus, USA = United States of America

## Supplementary table 134 – Function outcomes from observational studies in SLE

Table – Function (SLE), results and quality assessment of observational studies

| Study (date) [study type]                          | Results                                                                                                                                                                                                                                                                                       | Weight associated with outcome | Study Pop. | Attr. | Prog. Meas. | Outc. Meas. | Conf. | Stats. |
|----------------------------------------------------|-----------------------------------------------------------------------------------------------------------------------------------------------------------------------------------------------------------------------------------------------------------------------------------------------|--------------------------------|------------|-------|-------------|-------------|-------|--------|
| Katz (2011)<br>[Prospective cohort] <sup>387</sup> | <u>VLA disability, mean (SD), regression coefficient (p value)</u><br>BMI ≥30: 1.03 (0.59)<br>BMI <30: 0.67 (0.62) p<0.0001<br>Regression coefficient : 0.10 (0.01) [adjusted]<br>BMI ≥26.8: 0.95 (0.63)<br>BMI <26.8: 0.65 (0.61) p<0.0001<br>Regression coefficient: 0.04 (0.32) [adjusted] | ✓                              | L          | M     | L           | L           | L     | M      |

Attr. = attrition, BMI = body mass index, CI = confidence interval, Conf. = confounding, L = low risk of bias, M = moderate risk of bias, Outc. Meas = outcome measurement, Prog. Meas. = prognostic factor measurement, Pros = prospective, SD = standard deviation, SLE = systemic lupus erythematosus, Stats. = statistical analysis, Study Pop. = study population, VLA = valued life activities.



## Supplementary table 135 – Disease activity outcomes from observational studies in SLE

Table – Disease activity (SLE), results and quality assessment of observational studies

| Study (date) [study type]              | Results                                                                                                               | Weight associated with outcome | Study Pop. | Attr. | Prog. Meas. | Outc. Meas. | Conf. | Stats. |
|----------------------------------------|-----------------------------------------------------------------------------------------------------------------------|--------------------------------|------------|-------|-------------|-------------|-------|--------|
| Chaiamnuay (2007) [USA] <sup>388</sup> | <u>SLAM-R, BL BMI predicting average over follow-up</u><br>Unadjusted: r 0.095, p=0.072<br>Adjusted: t 1.093, p=0.203 | *                              | L          | H     | M           | L           | L     | M      |

Attr. = attrition, BMI = body mass index, CI = confidence interval, Conf. = confounding, H = high, L = low risk of bias, M = moderate risk of bias, Outc. Meas = outcome measurement, Prog. Meas. = prognostic factor measurement, Pros = prospective, SD = standard deviation, SLAM-R = Systemic Lupus Activity Measure – revised), SLE = systemic lupus erythematosus, Stats. = statistical analysis, Study Pop. = study population

## Supplementary table 136 – Fatigue outcomes from observational studies in SLE

Table – Fatigue (SLE), results and quality assessment of observational studies

| Study (date) [study type]              | Results                                                                                                                             | Weight associated with outcome | Study Pop. | Attr. | Prog. Meas. | Outc. Meas. | Conf. | Stats. |
|----------------------------------------|-------------------------------------------------------------------------------------------------------------------------------------|--------------------------------|------------|-------|-------------|-------------|-------|--------|
| Chaiamnuay (2007) [USA] <sup>388</sup> | <u>Fatigue severity scale, BL BMI predicting average over follow-up</u><br>Unadjusted: r 0.155 p=0.003<br>Adjusted: t 1.231 p=0.219 | *                              | L          | H     | M           | L           | L     | M      |

Attr. = attrition, BL = baseline, BMI = body mass index, CI = confidence interval, Conf. = confounding, H = high, L = low risk of bias, M = moderate risk of bias, Outc. Meas = outcome measurement, Prog. Meas. = prognostic factor measurement, Pros = prospective, SLE = systemic lupus erythematosus, Stats. = statistical analysis, Study Pop. = study population, USA = United States of America

## Supplementary table 137 – Damage outcomes from observational studies in SLE

Table – Damage (SLE), results and quality assessment of observational studies

| Study (date) [study type]             | Results                                                                                                             | Weight associated with outcome | Study Pop. | Attr. | Prog. Meas. | Outc. Meas. | Conf. | Stats. |
|---------------------------------------|---------------------------------------------------------------------------------------------------------------------|--------------------------------|------------|-------|-------------|-------------|-------|--------|
| Chaiamnuy (2007) [USA] <sup>388</sup> | <u>SLICC Damage Index, BL BMI predicting average over follow-up</u><br>Unadjusted: r 0.035, p=0.540<br>Adjusted: na | *                              | L          | H     | M           | L           | L     | M      |

Attr. = attrition, BL = baseline, BMI = body mass index, CI = confidence interval, Conf. = confounding, H = high, L = low risk of bias, M = moderate risk of bias, Outc. Meas = outcome measurement, Prog. Meas. = prognostic factor measurement, Pros = prospective, SLE = systemic lupus erythematosus, SLICC = Systemic Lupus Erythematosus International Collaborating Clinics Group, Stats. = statistical analysis, Study Pop. = study population, USA = United States of America

## Supplementary table 138 – Mental health outcomes from observational studies in SLE

Table – Mental health (SLE), results and quality assessment of observational studies

| Study (date) [study type]                                   | Results                                                                          | Weight associated with outcome | Study Pop. | Attr. | Prog. Meas. | Outc. Meas. | Conf. | Stats. |
|-------------------------------------------------------------|----------------------------------------------------------------------------------|--------------------------------|------------|-------|-------------|-------------|-------|--------|
| Figueiredo-Braga (2018) [Prospective cohort] <sup>385</sup> | <u>HADS depression &gt;8 after 1 month, OR (95% CI)</u><br>BMI 1.01 (1.00, 1.02) | ✓                              | L          | M     | M           | L           | L     | M      |

Attr. = attrition, BMI = body mass index, CI = confidence interval, Conf. = confounding, HADS = Hospital Anxiety and Depression Scale, L = low risk of bias, M = moderate risk of bias, OR = odds ratio, Outc. Meas = outcome measurement, Prog. Meas. = prognostic factor measurement, Pros = prospective, SLE = systemic lupus erythematosus, Stats. = statistical analysis, Study Pop. = study population

## Supplementary table 139 – Bone mineral density outcomes from observational studies in SLE

Table – Bone mineral density (SLE), results and quality assessment of observational studies

| Study (date) [study type]                                  | Results                                                                                                                                  | Weight associated with outcome | Study Pop. | Attr. | Prog. Meas. | Outc. Meas. | Conf. | Stats. |
|------------------------------------------------------------|------------------------------------------------------------------------------------------------------------------------------------------|--------------------------------|------------|-------|-------------|-------------|-------|--------|
| Jacobs (2013)<br>[Prospective cohort] <sup>386</sup>       | <u>Hip BMD, regression coefficient (p value) [unadjusted]</u><br>BMI change: 0.075 (0.103)<br><u>lumbar spine</u><br>BMI non-significant | x                              | L          | L     | L           | L           | M     | M      |
| Uaratanawong (2004)<br>[Prospective cohort] <sup>390</sup> | BMI not associated with change in BMD [unadjusted]                                                                                       | x                              | L          | L     | L           | L           | H     | H      |

Attr. = attrition, BMD = bone mineral density, BMI = body mass index, CI = confidence interval, Conf. = confounding, H = high, L = low risk of bias, M = moderate risk of bias, Outc. Meas = outcome measurement, Prog. Meas. = prognostic factor measurement, Pros = prospective, SD = standard deviation, SLE = systemic lupus erythematosus, Stats. = statistical analysis, Study Pop. = study population

## Supplementary table 139 – Comorbidity outcomes from observational studies in SLE

Table – Comorbidity (SLE), results and quality assessment of observational studies

| Study (date) [study type]                               | Results                                                                                                      | Weight associated with outcome | Study Pop. | Attr. | Prog. Meas. | Outc. Meas. | Conf. | Stats. |
|---------------------------------------------------------|--------------------------------------------------------------------------------------------------------------|--------------------------------|------------|-------|-------------|-------------|-------|--------|
| Chaiamnuy (2007)<br>[Prospective cohort] <sup>389</sup> | <u>Hypertension, OR (95% CI)</u><br>BMI, per unit: OR 1.060 (1.009, 1.114)                                   | ✓                              | L          | L     | L           | L           | L     | M      |
| Bruce (1998)<br>[Prospective cohort] <sup>391</sup>     | 79% of the patients with a cardiovascular event were obese                                                   | ✓                              | L          | H     | M           | L           | H     | H      |
| Petri (1992)<br>[Prospective cohort] <sup>392</sup>     | <u>Developing CAD, OR (95% C)</u><br>obese: OR 2.1 (0.8, 5.6) [univariate]<br>obese: beta 1.23089, SE0.67838 | ✓                              | L          | M     | M           | L           | M     | H      |

Attr. = attrition, BMI = body mass index, CAD = coronary artery disease, CI = confidence interval, Conf. = confounding, H= high, L = low risk of bias, M = moderate risk of bias, OR = odds ratio, Outc. Meas = outcome measurement, Prog. Meas. = prognostic factor measurement, Pros = prospective, Rand. Seq. = random sequence generation, SE = standard error, SLE = systemic lupus erythematosus, Stats. = statistical analysis, Study Pop. = study population

## Supplementary table 139 – Work outcomes from observational studies in SLE

Table – Work (SLE), results and quality assessment of observational studies

| Study (date) [study type]                          | Results                                                                                                                           | Weight associated with outcome | Study Pop. | Attr. | Prog. Meas. | Outc. Meas. | Conf. | Stats. |
|----------------------------------------------------|-----------------------------------------------------------------------------------------------------------------------------------|--------------------------------|------------|-------|-------------|-------------|-------|--------|
| Katz (2011)<br>[Prospective cohort] <sup>387</sup> | <u>Employed yes/no, OR (95% CI)</u><br>BMI ≥30 vs <30: 0.6 (0.3, 0.9) [adjusted]<br>BMI ≥26.8 vs <26.8: 0.5 (0.3, 0.8) [adjusted] | ✓                              | L          | M     | L           | L           | L     | M      |

Attr. = attrition, BMI = body mass index, CI = confidence interval, Conf. = confounding, L = low risk of bias, M = moderate risk of bias, OR = odds ratio, Outc. Meas = outcome measurement, Prog. Meas. = prognostic factor measurement, Pros = prospective, SLE = systemic lupus erythematosus, Stats. = statistical analysis, Study Pop. = study population

## Supplementary table 140 – Description of studies of assessing weight and outcomes in axSpA

Table – Axial Spondyloarthritis (axSpA), description of included studies

| Author (date) [country]                                         | Study design | Inclusion criteria                                                                                                                                                                                                                                                                                            | Exposure detail                                                          | N   | Age, mean (SD) years                                    | N (%) female                                | Funders                                                                                                                                                                                                                             |
|-----------------------------------------------------------------|--------------|---------------------------------------------------------------------------------------------------------------------------------------------------------------------------------------------------------------------------------------------------------------------------------------------------------------|--------------------------------------------------------------------------|-----|---------------------------------------------------------|---------------------------------------------|-------------------------------------------------------------------------------------------------------------------------------------------------------------------------------------------------------------------------------------|
| Hernandez-Breijo (2019) [Spain / The Netherlands] <sup>93</sup> | Pros. Cohort | axSpA according to ASAS and start INF or ADA                                                                                                                                                                                                                                                                  | BMI categories:<br>BMI ≤25<br>BMI >25                                    | 180 | 47.0 (12.7)                                             | 73 (40.5)                                   | <b>No funding</b>                                                                                                                                                                                                                   |
| Jeong (2018) [S. Korea] <sup>94</sup>                           | Pros. Cohort | Modified New York criteria, aged >18 years, Baseline + Follow-up ≥2 years radiographs                                                                                                                                                                                                                         | BMI – continuous                                                         | 151 | 25.3 (10.2)                                             | 17 (11.3)                                   | <b>Not reported</b> – authors declared no conflict of interest                                                                                                                                                                      |
| Pedersen (2018) [Denmark] <sup>95</sup>                         | Pros. Cohort | BIOSPA - starting anti-TNF, European spondyloarthropathy Study Group (ESSG) classification criteria for spondyloarthritis, BASDAI >3 despite NSAID treatment, clinical indication for anti-TNF, fulfil radiographic section of modified New York criteria, have inflammation and/or structural lesions on MRI | BMI categories:<br>Normal weight: 18.5-24.9<br>Overweight-obese: ≥25     | 33  | 40.3 (10.9)                                             | 7 (21.2)                                    | <b>No funding</b>                                                                                                                                                                                                                   |
| Maas (2017) [The Netherlands] <sup>96</sup>                     | Pros. Cohort | Groningen Leeuwarden AS (GLAS) cohort - started anti-TNF treatment, available radiographs at baseline and after 6 years, ≥18 years, modified New York Criteria                                                                                                                                                | BMI – continuous<br>BMI categories:<br>≥25<br><25                        | 80  | 41.3 (10.5)                                             | 24 (30.0)                                   | <b>Industry</b> (Pfizer)                                                                                                                                                                                                            |
| Maas (2017) [The Netherlands] <sup>97</sup>                     | Pros. Cohort | Groningen Leeuwarden AS (GLAS) cohort - radiographs available at baseline and 2 years, starting anti-TNF                                                                                                                                                                                                      | BMI – continuous                                                         | 292 | 42.8 (12.5)                                             | 87 (29.8)                                   | <b>Industry</b> (Pfizer)                                                                                                                                                                                                            |
| Micheroli (2017) [Switzerland] <sup>98</sup>                    | Pros. Cohort | Swiss Clinical Quality Management cohort - ASAS AXSPA patients, starting anti-TNF<br>exclusions: concurrent fibromyalgia, BMI <18.5                                                                                                                                                                           | BMI categories:<br>Normal: 18.5 - <25<br>Overweight: 25-30<br>Obese: >30 | 624 | 39.4 (11.6)                                             | 37.8%                                       | <b>Professional body</b> (Swiss Society of Rheumatology Swiss Balgrist Society), <b>Industry</b> (AbbVie, Bristol-Myers-Squibb, Janssen-Cilag, Merck Sharp & Dohme, Novartis, Pfizer, Roche, UCB), <b>Charity</b> (Arco Foundation) |
| Hwang (2017) [S. Korea] <sup>99</sup>                           | Pros. Cohort | ASAS axial SpA, AS patients met modified New York criteria, all treated with either adalimumab or infliximab                                                                                                                                                                                                  | BMI categories:<br>BMI ≥25                                               | 100 | Adalimumab:<br>34.9 (9.6)<br>Infliximab:<br>34.8 (11.7) | Adalimumab:<br>8.3%<br>Infliximab:<br>17.9% | <b>Government</b> (Ministry of Health & Welfare, Republic of Korea)                                                                                                                                                                 |

ACR = American College of Rheumatology, ADA = adalimumab, AS = Ankylosing spondylitis, ASAS = Assessment of SpondyloArthritis international Society, axSpA = axial spondyloarthritis, BASDAI = Bath Ankylosing Spondylitis Disease Activity Index, BMI = body mass index, INF = infliximab, N = number, NSAID = non-steroidal anti-inflammatory drug, pros. = prospective, SD = standard deviation, TNFi = tumour necrosis factor inhibitor

Table – Axial Spondyloarthritis (axSpA), description of included studies

| Author (date) [country]                           | Study design | Inclusion criteria                                                                                                                                   | Exposure detail                                                      | N   | Age, mean (SD) years            | N (%) female | Funders                                                         |
|---------------------------------------------------|--------------|------------------------------------------------------------------------------------------------------------------------------------------------------|----------------------------------------------------------------------|-----|---------------------------------|--------------|-----------------------------------------------------------------|
| van Weely (2016) [The Netherlands] <sup>400</sup> | Pros. Cohort | AS (modified New York criteria) patients, aged ≥18 years, TNFi-naïve and eligible for TNFi treatment, Dutch speaking                                 | BMI – continuous                                                     | 257 | 43.3 (11.5)                     | 84 (32.7)    | <b>Not reported</b>                                             |
| Maas (2015) [The Netherlands] <sup>401</sup>      | Pros. Cohort | Groningen Leeuwarden AS (GLAS) cohort - aged >18 years, modified New York criteria, starting anti-TNF                                                | BMI – continuous                                                     | 176 | 42.3 (11.1)                     | 55 (31.3)    | <b>Industry</b> (Pfizer)                                        |
| Gremese (2014) [Italy] <sup>402</sup>             | Pros. Cohort | ASAS criteria for Axial SpA, treated with anti-TNF, axial involvement, naïve to previous TNFi, active disease (BASDAI ≥4 despite 3 months of NSAIDs) | BMI categories:<br><25 = normal<br>25-30 = overweight<br>>30 = obese | 170 | 39.5 (11.8)                     | 52 (30.6)    | <b>Charity</b> (ASRALES ONLUS Foundation)                       |
| Kim (2014) [S. Korea] <sup>352</sup>              | Pros. Cohort | Starting anti-TNF, modified New York criteria                                                                                                        | BMI categories:<br>BMI <22                                           | 336 | 36.6 (12.3)                     | 64 (19.0)    | <b>Not reported</b> – Authors declared no conflict of interest  |
| Ottaviani (2012) [France] <sup>403</sup>          | Pros. Cohort | European Spondyloarthropathy Study Group AS criteria, starting infliximab                                                                            | BMI – continuous                                                     | 155 | Median (IQR): 43.1 (35.0, 51.8) | 57 (36.8)    | <b>Not reported</b> – authors declared no conflicts of interest |
| Ward (2002) [USA] <sup>187</sup>                  | Pros. Cohort | New York criteria, aged >18 years, no inflammatory bowel disease<br>exclusion: inflammatory bowel disease                                            | BMI – continuous                                                     | 212 | 47.8 (13.6)                     | 63 (29.7)    | <b>Charity</b> (Bartman Foundation)                             |

ACR = American College of Rheumatology, AS = Ankylosing spondylitis, ASAS = Assessment of SpondyloArthritis international Society, axSpA = axial spondyloarthritis, BASDAI = Bath Ankylosing Spondylitis Disease Activity Index, BMI = body mass index, DMARD = disease modifying anti-rheumatic drug, IQR = interquartile range, N = number, NSAID = non-steroidal anti-inflammatory drugs, pros. = prospective, SD = standard deviation, TNFi = tumour necrosis factor inhibitor, USA = United States of America

## Supplementary table 141 – Pain outcomes from observational studies in axSpA

Table – Pain (axSpA), results and quality assessment of observational studies

| Study (date) [study type]                                         | Results                                                              | Weight associated with outcome | Study Pop. | Attr. | Prog. Meas. | Outc. Meas. | Conf. | Stats. |
|-------------------------------------------------------------------|----------------------------------------------------------------------|--------------------------------|------------|-------|-------------|-------------|-------|--------|
| Ottaviani (2012) [Prospective cohort] <sup>403</sup> (Infliximab) | <u>Pain VAS50 at 6 months, OR (95% CI)</u><br>BMI: 0.87 (0.80, 0.93) | ✓                              | L          | L     | L           | L           | M     | M      |

Attr. = attrition, axSpA = axial spondyloarthritis, BMI = body mass index, CI = confidence interval, Conf. = confounding, L = low risk of bias, M = moderate risk of bias, OR = odds ratio, Outc. Meas = outcome measurement, Prog. Meas. = prognostic factor measurement, Pros = prospective, Rand. Seq. = random sequence generation, SD = standard deviation, Stats. = statistical analysis, Study Pop. = study population, VAS = visual analogue scale

## Supplementary table 142 – Function outcomes from observational studies in axSpA

Table – Function (axSpA), results and quality assessment of observational studies

| Study (date) [study type]                            | Results                                                                                                                                           | Weight associated with outcome | Study Pop. | Attr. | Prog. Meas. | Outc. Meas. | Conf. | Stats. |
|------------------------------------------------------|---------------------------------------------------------------------------------------------------------------------------------------------------|--------------------------------|------------|-------|-------------|-------------|-------|--------|
| van Weely (2016) [Prospective cohort] <sup>400</sup> | <u>Mixed model, multivariable model change (95%CI):</u><br>BASFI 0-6 months: BMI not included<br>BASFI 6-36 months: BMI = -0.029 (-0.078, 0.020), | ✘                              | L          | L     | L           | L           | M     | M      |
| Ward (2002) [Prospective cohort] <sup>187</sup>      | <u>Change in slope HAQ score over time:</u><br>Univariate: BMI 0.0059 (-0.0003, 0.0122) p=0.07<br>Multivariable: BMI not included in final model  | ✘                              | L          | M     | L           | L           | H     | H      |

Attr. = attrition, axSpA = axial spondyloarthritis, BASFI = Bath Ankylosing Spondylitis Functional Index, BMI = body mass index, CI = confidence interval, Conf. = confounding, H = high, HAQ = Health Assessment Questionnaire, L = low risk of bias, M = moderate risk of bias, Outc. Meas = outcome measurement, Prog. Meas. = prognostic factor measurement, Pros = prospective, Stats. = statistical analysis, Study Pop. = study population

## Supplementary table 143 – Disease activity outcomes from observational studies in axSpA

Table – Disease activity (axSpA), results and quality assessment of observational studies

| Study (date) [study type]                                         | Results                                                                                                                                                                                                                                                                                                                                                                                                                                                                                                                                                                                                                                                                                                                                                                                      | Weight associated with outcome | Study Pop. | Attr. | Prog. Meas. | Outc. Meas. | Conf. | Stats. |
|-------------------------------------------------------------------|----------------------------------------------------------------------------------------------------------------------------------------------------------------------------------------------------------------------------------------------------------------------------------------------------------------------------------------------------------------------------------------------------------------------------------------------------------------------------------------------------------------------------------------------------------------------------------------------------------------------------------------------------------------------------------------------------------------------------------------------------------------------------------------------|--------------------------------|------------|-------|-------------|-------------|-------|--------|
| Hernandez-Breijo (2019) [Prospective cohort] <sup>393</sup>       | <p><u>Multivariable Logistic regression, OR (95%CI), ref= no csDMARDs:</u></p> <p><u>clinical response</u></p> <p>BMI≤25 (n=60):<br/>any csDMARD = 1.10 (0.33-3.58)<br/>MTX/ +/- SSZ = 1.04 (0.25 - 4.25)<br/>SSZ = 1.18 (0.25-5.63)</p> <p>BMI&gt;25 (n=81):<br/>any csDMARD = 7.86 (2.39, 25.78)<br/>MTX/ +/- SSZ = 9.82 (2.13-45.20)<br/>SSZ = 6.86 (1.85-25.40)</p> <p><u>remission</u></p> <p>BMI≤25<br/>any csDMARD = 0.76 (0.20, 2.86)<br/>MTX +/- SSZ = 0.60 (0.11, 3.18)<br/>SSZ = 0.99 (0.17, 5.64)</p> <p>BMI&gt;25<br/>any csDMARD = 4.84 (1.09, 21.39)<br/>MTX +/- SSZ = 5.56 (0.84, 36.52)<br/>SSZ = 4.35 (0.77, 24.54)</p> <p>[Concomitant DMARDs with TNF inhibitor improves chances of response and remission in overweight patients but not in normal weight patients]</p> | ✓                              | M          | M     | M           | L           | L     | M      |
| Micheroli (2017) [Prospective cohort] <sup>398</sup>              | <p><u>BASDAI, baseline / 1 year, mean(SD) [adjusted]</u></p> <p>normal: 5.3 (2.0) / 2.9 (2.2)<br/>overweight: 5.6 (1.9) / 3.2 (2.2)<br/>obese: 6.1 (1.7) / 4.1 (2.4)</p>                                                                                                                                                                                                                                                                                                                                                                                                                                                                                                                                                                                                                     | ✓                              | L          | M     | L           | L           | L     | M      |
| Ottaviani (2012) [Prospective cohort] <sup>403</sup> (infliximab) | <p><u>BASDAI50 at 6 months, OR (95% CI)</u></p> <p>BMI: 0.87 (0.81, 0.94)</p>                                                                                                                                                                                                                                                                                                                                                                                                                                                                                                                                                                                                                                                                                                                | ✓                              | L          | L     | L           | L           | M     | M      |

Attr. = attrition, axSpA = axial spondyloarthritis, BASDAI = Bath Ankylosing Spondylitis Disease Activity Index, BMI = body mass index, CI = confidence interval, Conf. = confounding, csDMARD = conventional synthetic disease modifying anti-rheumatic drug, L = low risk of bias, M = moderate risk of bias, MTX = methotrexate, OR = odds ratio, Outc. Meas = outcome measurement, Prog. Meas. = prognostic factor measurement, Pros = prospective, SD = standard deviation, SSZ = sulfasalazine, Stats. = statistical analysis, Study Pop. = study population



## Supplementary table 144 – Fatigue outcomes from observational studies in axSpA

Table – Fatigue (axSpA), results and quality assessment of observational studies

| Study (date) [study type]                               | Results                                                                                                   | Weight associated with outcome | Study Pop. | Attr. | Prog. Meas. | Outc. Meas. | Conf. | Stats. |
|---------------------------------------------------------|-----------------------------------------------------------------------------------------------------------|--------------------------------|------------|-------|-------------|-------------|-------|--------|
| Micheroli (2017)<br>[Prospective cohort] <sup>398</sup> | <u>BASDAI fatigue, 1 year, mean(SD)</u><br>Normal: 4.0 (2.7)<br>Overweight: 4.1 (2.6)<br>Obese: 5.0 (2.4) | ✓                              | L          | M     | L           | L           | L     | M      |

Attr. = attrition, axSpA = axial spondyloarthritis, BASDAI = Bath Ankylosing Spondylitis Disease Activity Index, CI = confidence interval, Conf. = confounding, L = low risk of bias, M = moderate risk of bias, Outc. Meas = outcome measurement, Prog. Meas. = prognostic factor measurement, Pros = prospective, SD = standard deviation, Stats. = statistical analysis, Study Pop. = study population

## Supplementary table 145 – Radiographic progression outcomes from observational studies in axSpA

Table – Radiographic progression (axSpA), results and quality assessment of observational studies

| Study (date) [study type]                              | Results                                                                                                                                                                                                                                                                                                                                                                | Weight associated with outcome | Study Pop. | Attr. | Prog. Meas. | Outc. Meas. | Conf. | Stats. |
|--------------------------------------------------------|------------------------------------------------------------------------------------------------------------------------------------------------------------------------------------------------------------------------------------------------------------------------------------------------------------------------------------------------------------------------|--------------------------------|------------|-------|-------------|-------------|-------|--------|
| Jeong (2018)<br>[Prospective cohort] <sup>394</sup>    | <u>Spinal radiographic progression, Regression (p value) [adjusted]</u><br>BMI continuous: 0.045 (SE=0.021) (p=0.039)                                                                                                                                                                                                                                                  | ✓                              | L          | L     | L           | L           | L     | M      |
| Pedersen (2018)<br>[Prospective cohort] <sup>395</sup> | <u>Progression in spine mSASSS score, OR (95% CI)</u><br>BMI normal vs overweight: 0.57 (0.11, 3.04) [unadjusted]<br><u>Progression in spine New bone formation score, OR (95% CI)</u><br>BMI normal vs overweight: 2.86 (0.53, 15.47) [unadjusted]<br><u>Progression in sacrolitic joint, OR (95% CI)</u><br>BMI normal vs overweight: 0.28 (0.06, 1.41) [unadjusted] | ✗                              | L          | M     | L           | L           | M     | M      |
| Maas (2017)<br>[Prospective cohort] <sup>396</sup>     | <u>Spinal radiographic progression over time (GEE), regression coefficient (95% CI)</u><br>Baseline BMI continuous: 1.53 (0.41, 2.64)<br>Baseline ≥25 BMI vs <25: 12.62 (4.85, 20.40)                                                                                                                                                                                  | ✓                              | L          | L     | L           | L           | L     | L      |
| Maas (2015)<br>[Prospective cohort] <sup>401</sup>     | <u>Spinal radiographic progression over time (GEE), regression coefficient (95% CI)</u><br>Longitudinal BMI: -0.02 (-0.09, 0.05)                                                                                                                                                                                                                                       | ✗                              | L          | M     | L           | L           | L     | M      |

Attr. = attrition, axSpA = axial spondyloarthritis, BL = baseline, BMI = body mass index, CI = confidence interval, Conf. = confounding, GEE = Generalised Estimating Equations, L = low risk of bias, M = moderate risk of bias, mSASSS, modified Stoke Ankylosing Spondylitis Spinal Score, OR = odds ratio, Outc. Meas = outcome measurement, Prog. Meas. = prognostic factor measurement, Pros = prospective, SE = standard error, Stats. = statistical analysis, Study Pop. = study population,

## Supplementary table 146 – CRP outcomes from observational studies in axSpA

Table – CRP (axSpA), results and quality assessment of observational studies

| Study (date) [study type]                            | Results                                                  | Weight associated with outcome | Study Pop. | Attr. | Prog. Meas. | Outc. Meas. | Conf. | Stats. |
|------------------------------------------------------|----------------------------------------------------------|--------------------------------|------------|-------|-------------|-------------|-------|--------|
| Ottaviani (2012) [Prospective cohort] <sup>403</sup> | CRP50 at 6 months, OR (95% CI)<br>BMI: 0.93 (0.88, 0.99) | ✓                              | L          | L     | L           | L           | M     | M      |

Attr. = attrition, axSpA = axial spondyloarthritis, BMI = body mass index, CI = confidence interval, Conf. = confounding, CRP = C-reactive protein, L = low risk of bias, M = moderate risk of bias, OR = odds ratio, Outc. Meas = outcome measurement, Prog. Meas. = prognostic factor measurement, Pros = prospective, Stats. = statistical analysis, Study Pop. = study population

## Supplementary table 147 – Response criteria outcomes from observational studies in axSpA

Table – Response criteria (axSpA), results and quality assessment of observational studies

| Study (date) [study type]                            | Results                                                                                                                                 | Weight associated with outcome | Study Pop. | Attr. | Prog. Meas. | Outc. Meas. | Conf. | Stats. |
|------------------------------------------------------|-----------------------------------------------------------------------------------------------------------------------------------------|--------------------------------|------------|-------|-------------|-------------|-------|--------|
| Micheroli (2017) [Prospective cohort] <sup>398</sup> | ASAS40 at 1 year, OR (95% CI)<br>normal: ref<br>overweight: 0.66 (0.34, 1.30) [adjusted]<br>obese: 0.18 (0.05, 0.59) [adjusted]         | ✓                              | L          | M     | L           | L           | L     | M      |
| Gremese (2014) [Prospective cohort] <sup>402</sup>   | BASDAI50 Poor response at 12 months, OR (95% CI)<br>BMI <25: 0.41 (0.19, 0.86) vs BMI 25-30<br>BMI ≥30: 3.57 (1.15, 11.11) vs BMI 25-30 | ✓                              | L          | L     | L           | L           | L     | M      |

ASAS40 = Assessment in SpondyloArthritis International Society 40% Response, Attr. = attrition, axSpA = axial spondyloarthritis, BASDAI = Bath Ankylosing Spondylitis Disease Activity Index, BMI = body mass index, CI = confidence interval, Conf. = confounding, L = low risk of bias, M = moderate risk of bias, OR = odds ratio, Outc. Meas = outcome measurement, Prog. Meas. = prognostic factor measurement, Pros = prospective, SD = standard deviation, Stats. = statistical analysis, Study Pop. = study population,

## Supplementary table 148 – Comorbidity outcomes from observational studies in axSpA

Table – Comorbidity (axSpA), results and quality assessment of observational studies

| Study (date) [study type]                          | Results                                                                                                                                    | Weight associated with outcome | Study Pop. | Attr. | Prog. Meas. | Outc. Meas. | Conf. | Stats. |
|----------------------------------------------------|--------------------------------------------------------------------------------------------------------------------------------------------|--------------------------------|------------|-------|-------------|-------------|-------|--------|
| Maas (2017)<br>[Prospective cohort] <sup>397</sup> | <u>Vertebral fracture at 2 years, mean (SD) BL BMI [unadjusted]</u><br>Present fracture: 27.7 (4.3)<br>Absent fracture: 26.2 (4.6) p=0.040 | ✓                              | L          | M     | L           | L           | H     | H      |
| Kim (2014)<br>[Prospective cohort] <sup>352</sup>  | <u>Predictors of tuberculosis occurrence, OR (95% CI) [adjusted]</u><br>BMI <22 vs BMI ≥22: OR 13.0 (1.51, 111.92)                         | ✓                              | L          | L     | L           | L           | L     | M      |

Attr. = attrition, axSpA = axial spondyloarthritis, BL = baseline, BMI = body mass index, CI = confidence interval, Conf. = confounding, H = high, L = low risk of bias, M = moderate risk of bias, OR = odds ratio, Outc. Meas = outcome measurement, Prog. Meas. = prognostic factor measurement, Pros = prospective, Rand. Seq. = random sequence generation, SD = standard deviation, Stats. = statistical analysis, Study Pop. = study population

## Supplementary table 149 – Drug discontinuation outcomes from observational studies in axSpA

Table – Drug discontinuation (axSpA), results and quality assessment of observational studies

| Study (date) [study type]                               | Results                                                                                                                         | Weight associated with outcome | Study Pop. | Attr. | Prog. Meas. | Outc. Meas. | Conf. | Stats. |
|---------------------------------------------------------|---------------------------------------------------------------------------------------------------------------------------------|--------------------------------|------------|-------|-------------|-------------|-------|--------|
| Micheroli (2017)<br>[Prospective cohort] <sup>398</sup> | <u>TNFi discontinuation, HR (95% CI) [adjusted]</u><br>normal: ref<br>overweight: 0.98 (0.79, 1.38)<br>obese: 1.01 (0.63, 1.65) | ✗                              | L          | M     | L           | L           | L     | M      |
| Hwang (2016)<br>[Prospective cohort] <sup>399</sup>     | <u>TNFi discontinuation, OR (95% CI)</u><br>BMI ≥25: OR 4.35 (1.01, 18.69)                                                      | ✓                              | M          | L     | L           | M           | H     | H      |

Attr. = attrition, axSpA = axial spondyloarthritis, BMI = body mass index, CI = confidence interval, Conf. = confounding, HR = hazard ratio, L = low risk of bias, M = moderate risk of bias, OR = odds ratio, Outc. Meas = outcome measurement, Prog. Meas. = prognostic factor measurement, Pros = prospective, Stats. = statistical analysis, Study Pop. = study population, TNFi = tumour necrosis factor inhibitor

## Supplementary table 150 – Description of studies of assessing weight and outcomes in PsA

Table – Psoriatic arthritis, description of reviews

| Authors (date)               | Review type | Study type included   | Exposure detail                                                                           | Number of studies included | Funders                                        |
|------------------------------|-------------|-----------------------|-------------------------------------------------------------------------------------------|----------------------------|------------------------------------------------|
| Lupoli (2016) <sup>323</sup> | MA          | Observational studies | Studies investigating the association between obesity and minimal disease activity in PsA | 7                          | <b>Government</b> (Italian Ministry of Health) |

MA = meta-analysis, PsA = psoriatic arthritis

Table – Psoriatic arthritis, description of included studies

| Author (date) [country]                           | Study design    | Inclusion criteria                                                                                                                                                                                                                                                                                                                                                                                                                                               | Exposure detail                                                                                                                                                                                                                                                                                                                                                                      | N              | Age, mean (SD) years                      | N (%) female                            | Funders                                                                                                                                                                                                                                                             |
|---------------------------------------------------|-----------------|------------------------------------------------------------------------------------------------------------------------------------------------------------------------------------------------------------------------------------------------------------------------------------------------------------------------------------------------------------------------------------------------------------------------------------------------------------------|--------------------------------------------------------------------------------------------------------------------------------------------------------------------------------------------------------------------------------------------------------------------------------------------------------------------------------------------------------------------------------------|----------------|-------------------------------------------|-----------------------------------------|---------------------------------------------------------------------------------------------------------------------------------------------------------------------------------------------------------------------------------------------------------------------|
| Di Minno (2014) [Italy] <sup>404</sup>            | RCT             | CASPAR criteria PsA, referred to start anti-TNF<br>Exclusion: aged <18 years, previous treatment with TNF $\alpha$ blockers, current treatment with corticosteroids, history of arterial or venous thrombosis, malignancy, haematological/oncological diseases, autoimmune diseases other than PsA, unstable medical conditions, ongoing pregnancy.                                                                                                              | overweight = BMI 25-30,<br>obese = BMI >30 and/or waist circumference >102cm for men and >88cm for women<br>1) Hypocaloric diet - designed to produce a caloric restriction of about 30% of total energy requirements, restriction of calorie intake to <1500 kcal/day, restriction of fat intake to 30–35%, avoidance of trans fats, high-fibre uptake<br>p) Free self-managed diet | 1) 63<br>p) 63 | 1) 46.8 (10.4)<br>p) 43.5 (12.4)          | 1) 40 (63.5)<br>p) 40 (63.5)            | <b>Not reported</b> – authors declared no conflict of interest                                                                                                                                                                                                      |
| Klingberg (2019) [Sweden] <sup>405</sup>          | Single arm int. | CASPAR criteria, BMI $\geq$ 33, aged 25-75 years, consistent meds for 3 months<br>Exclusions: pregnancy, porphyria, epilepsy, type 1 diabetes, severe heart, kidney or catabolic disease, binge eating disorders, treatment with warfarin, lithionin or phenantoin, mental imbalance affecting participation, being subject to a heart infarction, stroke, major surgery or trauma during last the 3 months and being treated for cancer during the last 5 years | Calorie restriction 640 cal / day, four daily portions of powder dissolved in cold or hot water and consumed as shakes or soups for 12 weeks. After 12 weeks, food gradually reintroduced.                                                                                                                                                                                           | 41             | Median (IQR): 54 (48.5, 62)               | 26 (63.4)                               | <b>Government</b> (Swedish Government), <b>Professional body</b> (Gothenburg Society of Medicine, Swedish Rheumatology Association), <b>Charity</b> (Inger Bendix foundation, Rune and Ulla Amlövs foundation, Stiftelsen Psoriasisfonden), <b>Industry</b> (Roche) |
| Polachek (2017) [Canada] <sup>406</sup>           | Pros. Cohort    | University of Toronto PsA cohort - fulfilled CASPAR criteria                                                                                                                                                                                                                                                                                                                                                                                                     | BMI – continuous                                                                                                                                                                                                                                                                                                                                                                     | 803            | 50.8 (13.4)                               | 43%                                     | <b>Charity</b> (Krembil Foundation), <b>Industry</b> (Janssen Canada)                                                                                                                                                                                               |
| Højgaard (2016) [Denmark, Iceland] <sup>407</sup> | Pros. Cohort    | DANBIO & ICEBIO registers<br>Exclusions: participation in clinical trials, erroneous baseline information, patients treated with biologics other than TNFi and those not followed from initiation of treatment or without any consecutive clinical registrations                                                                                                                                                                                                 | BMI categories:<br>Normal: BMI <30<br>Obese: BMI $\geq$ 30                                                                                                                                                                                                                                                                                                                           | 1943           | Normal: 47.3 (12.5)<br>Obese: 49.4 (11.9) | Normal: 458 (53.1)<br>Obese: 236 (57.8) | <b>Professional body</b> (Danish Rheumatism Association, Danish Psoriasis Association), <b>Charity</b> (Robert and Kirsten Wehnert's fund, OAK Foundation), <b>Hospital</b> (Gentofte Hospital)                                                                     |

BMI = body mass index, CASPAR = Classification Criteria for Psoriatic Arthritis, IQR = interquartile range, N = number, PsA = psoriatic arthritis, RCT= randomised controlled trial, SD = standard deviation, TNFi = tumour necrosis factor inhibitor

Table – Psoriatic arthritis, description of included studies

| Author (date) [country]                | Study design | Inclusion criteria                                                                                                                                                                                                                                            | Exposure detail                                                               | N   | Age, mean (SD) years                                                       | N (%) female                                                            | Funders                                                                                                                                                     |
|----------------------------------------|--------------|---------------------------------------------------------------------------------------------------------------------------------------------------------------------------------------------------------------------------------------------------------------|-------------------------------------------------------------------------------|-----|----------------------------------------------------------------------------|-------------------------------------------------------------------------|-------------------------------------------------------------------------------------------------------------------------------------------------------------|
| Eder (2015) [Canada] <sup>408</sup>    | Pros. Cohort | Presence of psoriasis and inflammatory arthritis and exclusion of other types of arthritis                                                                                                                                                                    | BMI categories:<br>Normal: BMI <25<br>Overweight: BMI 25-30<br>Obese: BMI >30 | 557 | Normal:<br>50.7 (14.9)<br>Overweight:<br>52.3 (13.2)<br>Obese: 53.2 (10.1) | Normal: 99 (55.0)<br>Overweight: 62 (31.0)<br>Obese: 90 (45.7)          | <b>Charity</b> (The Arthritis Society, Krembil Foundation),<br><b>Government</b> (Canadian Institutes of Health Research),                                  |
| Mease (2015) [USA] <sup>409</sup>      | Pros. Cohort | Corrona Study - diagnosis of PsA with CASPAR criteria, aged ≥18 years, started biologic ≥2005, follow-up ≥90 days after initiation                                                                                                                            | BMI – continuous                                                              | 519 | 51.6 (13.0)                                                                | 266 (51.3)                                                              | <b>Industry</b> (AbbVie, Amgen, AstraZeneca, Genentech, Horizon Pharma, Eli Lilly, Janssen Biotech, Novartis, Pfizer, Vertex, UCB)                          |
| Di Minno (2013) [Italy] <sup>410</sup> | Pros. Cohort | Classification of Psoriatic Arthritis (study group) criteria, referred to start TNFi, aged ≥18 years<br>Exclusions: previous treatment with TNFi, malignancy, hematologic diseases, autoimmune diseases other than PsA, unstable medical condition, pregnancy | BMI categories:<br>Normal weight: BMI ≤30<br>Obese: BMI >30                   | 270 | Normal weight:<br>51.1 (13.0)<br>Obese:<br>52.3 (9.8)                      | Normal weight:<br>65 (48.1)<br>Obese:<br>81 (60.0)                      | <b>Not reported</b>                                                                                                                                         |
| Iannone (2013) [Italy] <sup>411</sup>  | Pros. Cohort | CASPAR, DAS28≥3.2, anti-TNF therapy<br>Exclusions: axial or mutilans subset                                                                                                                                                                                   | BMI categories:<br>Normal: BMI <25<br>Overweight: BMI 25-30<br>Obese: BMI >30 | 135 | Normal:<br>50.9 (12)<br>Overweight:<br>53.0 (11)<br>Obese:<br>56.0 (11)    | Normal:<br>23 (53.4)<br>Overweight:<br>20 (42.6)<br>Obese:<br>24 (53.3) | <b>Not reported</b>                                                                                                                                         |
| Haddad (2013) [Canada] <sup>412</sup>  | Case-control | CASPAR criteria                                                                                                                                                                                                                                               | BMI – continuous                                                              | 312 | DISH:<br>62.9 (8.9)<br>No DISH:<br>49.3 (12.8)                             | DISH: 21 (26.9)<br>No DISH:<br>62 (26.5)                                | <b>Industry</b> (Janssen Canada), <b>Government</b> (Canadian Institutes of Health Research),<br><b>Charity</b> (The Arthritis Society, Krembil Foundation) |

BMI = body mass index, CASPAR = Classification Criteria for Psoriatic Arthritis, DAS28 = Disease Activity Score 28, DISH = Diffuse Idiopathic Skeletal Hyperostosis, N = number, pros. = prospective, PsA = psoriatic arthritis, Retro. = retrospective, SD = standard deviation, TNFi = tumour necrosis factor inhibitor, UK = United Kingdom, United States of America

## Supplementary table 151 – Pain outcomes from weight-loss interventions in PsA

Table – Pain (PsA), results and quality assessment

| Study (date) [study type]                         | Standardised result, SMD (95% CI) unless otherwise stated | Natural result                                                                                                                                                                           | Supports intervention | AMSTAR2 quality | Rand. Seq. | Alloc. Conc. | Blind. Part. | Blind. Asses. |
|---------------------------------------------------|-----------------------------------------------------------|------------------------------------------------------------------------------------------------------------------------------------------------------------------------------------------|-----------------------|-----------------|------------|--------------|--------------|---------------|
| Di Minno (2014) [RCT] <sup>404</sup>              |                                                           | <u>Pain VAS, change baseline-6 months, mean (SD)</u><br><5% weight loss: -1.97 (2.42)<br>≥5% weight loss: -4.00 (2.90), p=0.018 vs <5%<br>>10% weight loss: -5.06 (2.64), p<0.001 vs <5% | ✓                     |                 | L          | H/UC         | H/UC         | L             |
| Klingberg (2019) [Single arm int.] <sup>405</sup> |                                                           | <u>VAS pain (mm), Baseline / 6 months, median (IQR)</u><br>30 (18.5, 62.5) / 20 (5, 51.5) p=0.004                                                                                        | ✓                     |                 |            |              |              |               |

Alloc. Conc. = allocation concealment, AMSTAR2 = Assessing the Methodological Quality of Systematic Reviews, Blind. Asses. = Blinded assessors, Blind. Part. = blinded participants, CI = confidence interval, H/UC = high / unclear risk of bias, IQR = interquartile range, L = low risk of bias, Rand. Seq. = random sequence generation, SD = standard deviation, SMD = Standardised mean difference, VAS = visual analogue scale

## Supplementary table 152 – Pain outcomes from observational studies in PsA

Table – Pain (PsA), results and quality assessment of observational studies

| Study (date) [study type]                       | Results                                                                                                                    | Weight associated with outcome | Study Pop. | Attr. | Prog. Meas. | Outc. Meas. | Conf. | Stats. |
|-------------------------------------------------|----------------------------------------------------------------------------------------------------------------------------|--------------------------------|------------|-------|-------------|-------------|-------|--------|
| Eder (2015) [Prospective cohort] <sup>408</sup> | <u>Pain VAS ≤5, OR (95% CI), adjusted</u><br>Overweight vs Normal: 0.56 (0.43, 0.73)<br>Obese vs Normal: 0.45 (0.34, 0.58) | ✓                              | L          | M     | L           | L           | L     | M      |

Attr. = attrition, CI = confidence interval, Conf. = confounding, L = low risk of bias, M = moderate risk of bias, OR = odds ratio, Outc. Meas = outcome measurement, Prog. Meas. = prognostic factor measurement, Pros = prospective, PsA = psoriatic arthritis, Stats. = statistical analysis, Study Pop. = study population, VAS = visual analogue scale

## Supplementary table 153 – Function outcomes from weight-loss interventions in PsA

Table – Function (PsA), results and quality assessment

| Study (date) [study type]                         | Standardised result, SMD (95% CI) unless otherwise stated | Natural result                                                                                                   | Supports intervention | AMSTAR2 quality | Rand. Seq. | Alloc. Conc. | Blind. Part. | Blind. Asses. |
|---------------------------------------------------|-----------------------------------------------------------|------------------------------------------------------------------------------------------------------------------|-----------------------|-----------------|------------|--------------|--------------|---------------|
| Di Minno (2014) [RCT] <sup>404</sup>              |                                                           | <u>HAQ, change bl-6 mth, mean (SD)</u><br><5% weight loss: -0.53 (0.67)<br>≥5% weight loss: -1.29 (0.79) p=0.004 | ✓                     |                 | L          | H/UC         | H/UC         | L             |
| Klingberg (2019) [Single arm int.] <sup>405</sup> |                                                           | <u>HAQ, Baseline / 6 months, median (IQR)</u><br>0.70 (0.13, 1.00) / 0.43 (0, 0.69) p<0.001                      | ✓                     |                 |            |              |              |               |

Alloc. Conc. = allocation concealment, AMSTAR2 = Assessing the Methodological Quality of Systematic Reviews, BL = baseline, Blind. Asses. = Blinded assessors, Blind. Part. = blinded participants, CI = confidence interval, H/UC = high / unclear risk of bias, HAQ = Health Assessment Questionnaire, IQR = interquartile range, L = low risk of bias, PsA = psoriatic arthritis, Rand. Seq. = random sequence generation, SMD = Standardised mean difference, VAS = visual analogue scale

## Supplementary table 154 – Function outcomes from observational studies in PsA

Table – Function (PsA), results and quality assessment of observational studies

| Study (date) [study type]                          | Results                                                                                                                               | Weight associated with outcome | Study Pop. | Attr. | Prog. Meas. | Outc. Meas. | Conf. | Stats. |
|----------------------------------------------------|---------------------------------------------------------------------------------------------------------------------------------------|--------------------------------|------------|-------|-------------|-------------|-------|--------|
| Eder (2015) [Prospective cohort] <sup>408</sup>    | <u>HAQ ≤0.5, OR (95% CI), adjusted</u><br>Overweight vs Normal weight: 0.84 (0.68, 1.03)<br>Obese vs Normal weight: 0.62 (0.51, 0.75) | ✓                              | L          | M     | L           | L           | L     | M      |
| Iannone (2013) [Prospective cohort] <sup>411</sup> | <u>HAQ at follow-up, mean (SD)</u><br>Normal: 0.79 (0.9)<br>Overweight: 0.47 (0.8)<br>Obese: 0.81 (0.8) p=0.06                        | ✗                              | L          | L     | L           | L           | L     | M      |

Attr. = attrition, CI = confidence interval, Conf. = confounding, HAQ = Health Assessment Questionnaire, L = low risk of bias, M = moderate risk of bias, OR = odds ratio, Outc. Meas = outcome measurement, Prog. Meas. = prognostic factor measurement, Pros = prospective, PsA = psoriatic arthritis, SD = standard deviation, Stats. = statistical analysis, Study Pop. = study population



## Supplementary table 155 – Disease activity outcomes from weight-loss interventions in PsA

Table – Disease activity (PsA), results and quality assessment

| Study (date) [study type]                         | Standardised result, SMD (95% CI) unless otherwise stated | Natural result                                                                                                                                                                              | Supports intervention | AMSTAR2 quality | Rand. Seq. | Alloc. Conc. | Blind. Part. | Blind. Asses. |
|---------------------------------------------------|-----------------------------------------------------------|---------------------------------------------------------------------------------------------------------------------------------------------------------------------------------------------|-----------------------|-----------------|------------|--------------|--------------|---------------|
| Di Minno (2014) [RCT] <sup>404</sup>              |                                                           | <u>MDA, N(%) and OR (95% CI)</u><br><5% weight loss: 23.1%<br>≥5% weight loss: 50% OR 4.20 (1.82, 9.66)<br>Weight loss intervention: 42.9%<br>Control: 34.9% HR 1.85 (1.019, 3.345)         | ✓                     |                 | L          | H/UC         | H/UC         | L             |
| Klingberg (2019) [Single arm int.] <sup>405</sup> |                                                           | <u>DAS28, baseline /6 months, median (IQR)</u><br>2.9 (2.1, 3.7) / 2.4 (1.7, 3.0) p<0.001<br><u>DAPSA, Baseline / 6 months, median (IQR)</u><br>15.3 (6.6, 29.1) / 11.0 (2.8, 17.6) p<0.001 | ✓                     |                 |            |              |              |               |

Alloc. Conc. = allocation concealment, AMSTAR2 = Assessing the Methodological Quality of Systematic Reviews, Blind. Asses. = Blinded assessors, Blind. Part. = blinded participants, CI = confidence interval, DAPSA = Disease Activity in Psoriatic Arthritis, DAS28 = Disease Activity Score 28, H/UC = high / unclear risk of bias, IQR = interquartile range, L = low risk of bias, MDA = minimal disease activity, OR = odds ratio, Rand. Seq. = random sequence generation, SMD = Standardised mean difference

## Supplementary table 156 – Disease activity outcomes from observational studies in PsA

Table – Disease activity (PsA), results and quality assessment of observational studies

| Study (date) [study type]                                  | Results                                                                                                                                                                                                                                                                                                                                                                                                                                                           | Weight associated with outcome | AMSTAR2 | Study Pop. | Attr. | Prog. Meas. | Outc. Meas. | Conf. | Stats. |
|------------------------------------------------------------|-------------------------------------------------------------------------------------------------------------------------------------------------------------------------------------------------------------------------------------------------------------------------------------------------------------------------------------------------------------------------------------------------------------------------------------------------------------------|--------------------------------|---------|------------|-------|-------------|-------------|-------|--------|
| Lupoli (2016) [Meta-analysis] <sup>323</sup>               | <u>MDA, obese vs normal</u><br>OR 0.369 (0.249, 0.546)                                                                                                                                                                                                                                                                                                                                                                                                            | ✓                              | Low     |            |       |             |             |       |        |
| Højgaard (2016) [Prospective cohort] <sup>407</sup> (TNFi) | <u>DAS28 at 3 months, mean change (SD)</u><br>Obese: -1.49 (SD 1.48)<br>Non-obese: -1.47 (1.37) p=0.82<br><u>DAS28 at 6 months, mean change (SD)</u><br>Obese: -1.65 (1.49)<br>Non-obese: -1.59 (1.42) p=0.72<br><u>EULAR good response 6 months, OR (95% CI) [adjusted]</u><br>Obese vs non-obese: 0.75 (0.50, 1.15)<br><u>EULAR good or moderate 6 months, OR (95% CI) [adjusted]</u><br>Obese vs non-obese: 0.47 (0.30, 0.74)                                  | ✓                              |         | L          | H     | L           | L           | L     | M      |
| Eder (2015) [Prospective cohort] <sup>408</sup>            | <u>MDA, OR (95% CI), unadjusted / adjusted</u><br>Overweight vs normal: 0.65 (0.50, 0.85) / 0.66 (0.50, 0.87)<br>Obese vs normal: 0.52 (0.40, 0.67) / 0.53 (0.41, 0.69)                                                                                                                                                                                                                                                                                           | ✓                              |         | L          | M     | L           | L           | L     | M      |
| Mease (2015) [Prospective cohort] <sup>409</sup>           | <u>Time to remission, HR (p value)</u><br>BMI continuous: 0.955 (p<0.001)                                                                                                                                                                                                                                                                                                                                                                                         | ✓                              |         | L          | M     | L           | L           | L     | M      |
| Di Minno (2013) [Prospective cohort] <sup>410</sup>        | <u>Not achieving MDA in first 12 months, HR (95% CI) [adjusted]</u><br>Obese vs normal: HR 4.90 (3.04, 7.87)<br><u>Not achieving MDA in second 12 months, HR (95% CI) [adjusted]</u><br>Obese vs normal: HR 2.04 (1.015, 3.61)                                                                                                                                                                                                                                    | ✓                              |         | L          | L     | L           | L           | L     | M      |
| Iannone (2013) [Prospective cohort] <sup>411</sup> (TNFi)  | <u>DAS28 at follow-up, normal/overweight/obese, mean (SD)</u><br>3.1 (1.6) / 2.9 (1.6) / 3.2 (1.5) p=0.42<br><u>SDAI at follow-up, normal/overweight/obese, mean (SD)</u><br>14.2 (13) / 11.6 (12) / 13.0 (12) p=0.44<br><u>DAS28 remission, normal/overweight/obese, %</u><br>44 / 46 / 37<br>BMI: OR 0.96 (0.78, 1.17) [adjusted]<br>obesity (y/n): OR 1.17 (0.11, 11.8) [adjusted]<br><u>SDAI remission, normal/overweight/obese, %</u><br>21 / 38 / 21 p=0.07 | ✗                              |         | L          | L     | L           | L           | L     | M      |

Attr. = attrition, BMI = body mass index, CI = confidence interval, Conf. = confounding, DAS28 = disease activity score 28, EULAR = European League Against Rheumatism, H = high, HR = hazard ratio, L = low risk of bias, M = moderate risk of bias, MDA = minimal disease activity, OR = odds ratio, Outc. Meas. = outcome measurement, Prog. Meas. = prognostic factor measurement, Pros = prospective, PsA = psoriatic arthritis, SD = standard deviation, SDAI = Simplified Disease Activity Index, Stats. = statistical analysis, Study Pop. = study population, TNFi = tumour necrosis factor inhibitor

## Supplementary table 157 – Tender joint count outcomes from weight-loss interventions in PsA

Table – Tender joint count (PsA), results and quality assessment

| Study (date) [study type]                         | Standardised result, SMD (95% CI) unless otherwise stated | Natural result                                                                       | Supports intervention | AMSTAR2 quality | Rand. Seq. | Alloc. Conc. | Blind. Part. | Blind. Asses. |
|---------------------------------------------------|-----------------------------------------------------------|--------------------------------------------------------------------------------------|-----------------------|-----------------|------------|--------------|--------------|---------------|
| Klingberg (2019) [Single arm int.] <sup>405</sup> |                                                           | Tender joint count, Baseline /6 months, median (IQR)<br>4 (1-14) / 2 (0-6.5) p<0.001 | ✓                     |                 |            |              |              |               |

Alloc. Conc. = allocation concealment, AMSTAR2 = Assessing the Methodological Quality of Systematic Reviews, Blind. Asses. = Blinded assessors, Blind. Part. = blinded participants, CI = confidence interval, H/UC = high / unclear risk of bias, IQR = interquartile range, L = low risk of bias, PsA = psoriatic arthritis, Rand. Seq. = random sequence generation, SMD = Standardised mean difference

## Supplementary table 158 – Tender joint count outcomes from observational studies in PsA

Table – Tender joint count (PsA), results and quality assessment of observational studies

| Study (date) [study type]                       | Results                                                                                                                              | Weight associated with outcome | Study Pop. | Attr. | Prog. Meas. | Outc. Meas. | Conf. | Stats. |
|-------------------------------------------------|--------------------------------------------------------------------------------------------------------------------------------------|--------------------------------|------------|-------|-------------|-------------|-------|--------|
| Eder (2015) [Prospective cohort] <sup>408</sup> | Tender joint count $\leq 1$ , OR (95% CI), adjusted<br>Overweight vs Normal: 0.88 (0.73, 1.06)<br>Obese vs Normal: 0.79 (0.66, 0.93) | ✓                              | L          | M     | L           | L           | L     | M      |

Attr. = attrition, CI = confidence interval, Conf. = confounding, L = low risk of bias, M = moderate risk of bias, OR = odds ratio, Outc. Meas = outcome measurement, Prog. Meas. = prognostic factor measurement, Pros = prospective, PsA = psoriatic arthritis, Stats. = statistical analysis, Study Pop. = study population

## Supplementary table 159 – Swollen joint count outcomes from weight-loss interventions in PsA

Table – Swollen joint count (PsA), results and quality assessment

| Study (date) [study type]                         | Standardised result, SMD (95% CI) unless otherwise stated | Natural result                                                                        | Supports intervention | AMSTAR2 quality | Rand. Seq. | Alloc. Conc. | Blind. Part. | Blind. Asses. |
|---------------------------------------------------|-----------------------------------------------------------|---------------------------------------------------------------------------------------|-----------------------|-----------------|------------|--------------|--------------|---------------|
| Klingberg (2019) [Single arm int.] <sup>405</sup> |                                                           | Swollen joint count, Baseline / 6 months, median (IQR)<br>0 (0-1) / 0 (0-0.5) p=0.021 | ✓                     |                 |            |              |              |               |

Alloc. Conc. = allocation concealment, AMSTAR2 = Assessing the Methodological Quality of Systematic Reviews, Blind. Asses. = Blinded assessors, Blind. Part. = blinded participants, CI = confidence interval, H/UC = high / unclear risk of bias, IQR = interquartile range, L = low risk of bias, PsA = psoriatic arthritis, SMD = Standardised mean difference

## Supplementary table 160 – Swollen joint count outcomes from observational studies in PsA

Table – Swollen joint count (PsA), results and quality assessment of observational studies

| Study (date) [study type]                       | Results                                                                                                                                | Weight associated with outcome | Study Pop. | Attr. | Prog. Meas. | Outc. Meas. | Conf. | Stats. |
|-------------------------------------------------|----------------------------------------------------------------------------------------------------------------------------------------|--------------------------------|------------|-------|-------------|-------------|-------|--------|
| Eder (2015) [Prospective cohort] <sup>408</sup> | Swollen joint count $\leq 1$ , OR (95% CI) [adjusted]<br>Overweight vs Normal: 1.11 (0.88, 1.40)<br>Obese vs Normal: 1.19 (0.95, 1.48) | *                              | L          | M     | L           | L           | L     | M      |

Attr. = attrition, CI = confidence interval, Conf. = confounding, L = low risk of bias, M = moderate risk of bias, OR = odds ratio, Outc. Meas = outcome measurement, Prog. Meas. = prognostic factor measurement, Pros = prospective, PsA = psoriatic arthritis, Rand. Seq. = random sequence generation, Stats. = statistical analysis, Study Pop. = study population

## Supplementary table 161 – Patient global assessment outcomes from weight-loss interventions in PsA

Table – Patient global (PsA), results and quality assessment

| Study (date) [study type]                         | Standardised result, SMD (95% CI) unless otherwise stated | Natural result                                                                                                                                                                                                        | Supports intervention | AMSTAR2 quality | Rand. Seq. | Alloc. Conc. | Blind. Part. | Blind. Asses. |
|---------------------------------------------------|-----------------------------------------------------------|-----------------------------------------------------------------------------------------------------------------------------------------------------------------------------------------------------------------------|-----------------------|-----------------|------------|--------------|--------------|---------------|
| Di Minno (2014) [RCT] <sup>404</sup>              |                                                           | <u>Patient global VAS, change baseline-6 months, mean (SD), p values vs &lt;5% weight loss</u><br><5% weight loss: -2.56 (1.94)<br>>5% weight loss: -4.68 (2.92), p<0.001<br>>10 % weight loss: -4.26 (2.02), p=0.008 | ✓                     |                 | L          | H/UC         | H/UC         | L             |
| Klingberg (2019) [Single arm int.] <sup>405</sup> |                                                           | <u>VAS global (mm), baseline / 6 months, median (IQR)</u><br>34 (19,61) / 12 (5,51) p=0.001                                                                                                                           | ✓                     |                 |            |              |              |               |

Alloc. Conc. = allocation concealment, AMSTAR2 = Assessing the Methodological Quality of Systematic Reviews, Blind. Asses. = Blinded assessors, Blind. Part. = blinded participants, CI = confidence interval, H/UC = high / unclear risk of bias, IQR = interquartile range, L = low risk of bias, Rand. Seq. = random sequence generation, SD = standard deviation, SMD = Standardised mean difference, VAS = visual analogue scale

## Supplementary table 162 – Patient global assessment outcomes from observational studies in PsA

Table – Patient global (PsA), results and quality assessment of observational studies

| Study (date) [study type]                       | Results                                                                                                                                                | Weight associated with outcome | Study Pop. | Attr. | Prog. Meas. | Outc. Meas. | Conf. | Stats. |
|-------------------------------------------------|--------------------------------------------------------------------------------------------------------------------------------------------------------|--------------------------------|------------|-------|-------------|-------------|-------|--------|
| Eder (2015) [Prospective cohort] <sup>408</sup> | <u>Patient global assessment VAS &lt;=20, OR (95% CI), [adjusted]</u><br>Overweight vs Normal: 0.44 (0.36, 0.55)<br>Obese vs Normal: 0.35 (0.29, 0.43) | ✓                              | L          | M     | L           | L           | L     | M      |

Attr. = attrition, CI = confidence interval, Conf. = confounding, L = low risk of bias, M = moderate risk of bias, OR = odds ratio, Outc. Meas. = outcome measurement, Prog. Meas. = prognostic factor measurement, Pros = prospective, PsA = psoriatic arthritis, Rand. Seq. = random sequence generation, Stats. = statistical analysis, Study Pop. = study population, VAS = visual analogue scale

## Supplementary table 163 – Quality of life outcomes from weight-loss interventions in PsA

Table – Quality of life (PsA), results and quality assessment

| Study (date) [study type]                         | Standardised result, SMD (95% CI) unless otherwise stated | Natural result                                                                                         | Supports intervention | AMSTAR2 quality | Rand. Seq. | Alloc. Conc. | Blind. Part. | Blind. Asses. |
|---------------------------------------------------|-----------------------------------------------------------|--------------------------------------------------------------------------------------------------------|-----------------------|-----------------|------------|--------------|--------------|---------------|
| Klingberg (2019) [Single arm int.] <sup>405</sup> |                                                           | <u>Dermatology Quality of Life , Baseline /6 months, median (IQR)</u><br>1 (0, 4.5) / 1 (0, 4) p=0.453 | *                     |                 |            |              |              |               |

Alloc. Conc. = allocation concealment, AMSTAR2 = Assessing the Methodological Quality of Systematic Reviews, Blind. Asses. = Blinded assessors, Blind. Part. = blinded participants, CI = confidence interval, H/UC = high / unclear risk of bias, IQR = interquartile range, L = low risk of bias, PsA = psoriatic arthritis, Rand. Seq. = random sequence generation, SMD = Standardised mean difference

## Supplementary table 164 – Fatigue outcomes from weight-loss interventions in PsA

Table – Fatigue (PsA), results and quality assessment

| Study (date) [study type]                         | Standardised result, SMD (95% CI) unless otherwise stated | Natural result                                                                                   | Supports intervention | AMSTAR2 quality | Rand. Seq. | Alloc. Conc. | Blind. Part. | Blind. Asses. |
|---------------------------------------------------|-----------------------------------------------------------|--------------------------------------------------------------------------------------------------|-----------------------|-----------------|------------|--------------|--------------|---------------|
| Klingberg (2019) [Single arm int.] <sup>405</sup> |                                                           | <u>VAS fatigue (mm) , Baseline /6 months, median (IQR)</u><br>56 (21.5, 67) / 25 (8, 44) p=0.001 | ✓                     |                 |            |              |              |               |

Alloc. Conc. = allocation concealment, AMSTAR2 = Assessing the Methodological Quality of Systematic Reviews, Blind. Asses. = Blinded assessors, Blind. Part. = blinded participants, CI = confidence interval, H/UC = high / unclear risk of bias, IQR = interquartile range, L = low risk of bias, PsA = psoriatic arthritis, Rand. Seq. = random sequence generation, SMD = Standardised mean difference, VAS = visual analogue scale

## Supplementary table 165 – CRP outcomes from weight-loss interventions in PsA

Table – CRP (PsA), results and quality assessment

| Study (date) [study type]                         | Standardised result, SMD (95% CI) unless otherwise stated | Natural result                                                                                                     | Supports intervention | AMSTAR2 quality | Rand. Seq. | Alloc. Conc. | Blind. Part. | Blind. Asses. |
|---------------------------------------------------|-----------------------------------------------------------|--------------------------------------------------------------------------------------------------------------------|-----------------------|-----------------|------------|--------------|--------------|---------------|
| Di Minno (2014) [RCT] <sup>404</sup>              |                                                           | CRP, change Baseline -6 months, mean (SD)<br><5% weight loss: -1.37 (7.48)<br>≥5% weight loss: -5.01 (9.5) p=0.023 | ✓                     |                 | L          | H/UC         | H/UC         | L             |
| Klingberg (2019) [Single arm int.] <sup>405</sup> |                                                           | CRP, Baseline / 6 months, median (IQR)<br>4 (2, 8.5) / 2 (1,6.5) p=0.041                                           | ✓                     |                 |            |              |              |               |

Alloc. Conc. = allocation concealment, AMSTAR2 = Assessing the Methodological Quality of Systematic Reviews, Blind. Asses. = Blinded assessors, Blind. Part. = blinded participants, CI = confidence interval, CRP = C-reactive Protein, H/UC = high / unclear risk of bias, IQR = interquartile range, L = low risk of bias, PsA = psoriatic arthritis, Rand. Seq. = random sequence generation, SD = standard deviation, SMD = Standardised mean difference

## Supplementary table 166 – ESR outcomes from weight-loss interventions in PsA

Table – ESR (PsA), results and quality assessment

| Study (date) [study type]            | Standardised result, SMD (95% CI) unless otherwise stated | Natural result                                                                                                                                                                                                                       | Supports intervention | AMSTAR2 quality | Rand. Seq. | Alloc. Conc. | Blind. Part. | Blind. Asses. |
|--------------------------------------|-----------------------------------------------------------|--------------------------------------------------------------------------------------------------------------------------------------------------------------------------------------------------------------------------------------|-----------------------|-----------------|------------|--------------|--------------|---------------|
| Di Minno (2014) [RCT] <sup>404</sup> |                                                           | ESR, change bl-6 mth, mean (SD)<br>Weight loss intervention: -14.9 (18.0)<br>Control: -2.04 (15.5) p<0.001<br><5% weight loss: -3.09 (16.2)<br>≥5% weight loss: -12.25 (18.22), p=0.004<br>>10% weight loss: -14.45 (20.14), p<0.001 | ✓                     |                 | L          | H/UC         | H/UC         | L             |

Alloc. Conc. = allocation concealment, AMSTAR2 = Assessing the Methodological Quality of Systematic Reviews, BL = baseline, Blind. Asses. = Blinded assessors, Blind. Part. = blinded participants, CI = confidence interval, ESR = erythrocyte sedimentation rate, H/UC = high / unclear risk of bias, L = low risk of bias, PsA = psoriatic arthritis, Rand. Seq. = random sequence generation, SD = standard deviation, SMD = Standardised mean difference

## Supplementary table 167 – Psoriasis outcomes from weight-loss interventions in PsA

Table – Psoriasis score (PsA), results and quality assessment

| Study (date) [study type]                         | Standardised result, SMD (95% CI) unless otherwise stated | Natural result                                                                                          | Supports intervention | AMSTAR2 quality | Rand. Seq. | Alloc. Conc. | Blind. Part. | Blind. Asses. |
|---------------------------------------------------|-----------------------------------------------------------|---------------------------------------------------------------------------------------------------------|-----------------------|-----------------|------------|--------------|--------------|---------------|
| Klingberg (2019) [Single arm int.] <sup>405</sup> |                                                           | Psoriasis body surface area %, Baseline / 6 months, median (IQR)<br>1.6 (0, 2.2) / 0.9 (0, 1.1) p=0.014 | ✓                     |                 |            |              |              |               |

Alloc. Conc. = allocation concealment, AMSTAR2 = Assessing the Methodological Quality of Systematic Reviews, Blind. Asses. = Blinded assessors, Blind. Part. = blinded participants, CI = confidence interval, H/UC = high / unclear risk of bias, IQR = interquartile range, L = low risk of bias, PsA = psoriatic arthritis, SMD = Standardised mean difference

## Supplementary table 168 – Psoriasis outcomes from observational studies in PsA

Table – Psoriasis score (PsA), results and quality assessment of observational studies

| Study (date) [study type]                       | Results                                                                                                                                 | Weight associated with outcome | Study Pop. | Attr. | Prog. Meas. | Outc. Meas. | Conf. | Stats. |
|-------------------------------------------------|-----------------------------------------------------------------------------------------------------------------------------------------|--------------------------------|------------|-------|-------------|-------------|-------|--------|
| Eder (2015) [Prospective cohort] <sup>408</sup> | PASI ≤1 or BSA ≤1, OR (95% CI), adjusted<br>Overweight vs Normal weight: 0.43 (0.31, 0.61)<br>Obese vs Normal weight: 0.28 (0.21, 0.39) | ✓                              | L          | M     | L           | L           | L     | M      |

Attr. = attrition, CI = confidence interval, Conf. = confounding, L = low risk of bias, M = moderate risk of bias, OR = odds ratio, Outc. Meas = outcome measurement, PASI = Psoriasis Area Severity Index, Prog. Meas. = prognostic factor measurement, Pros = prospective, PsA = psoriatic arthritis, Stats. = statistical analysis, Study Pop. = study population



## Supplementary table 169 – Comorbidity outcomes from observational studies in PsA

Table – Comorbidity (PsA), results and quality assessment of observational studies

| Study (date) [study type]                           | Results                                                                  | Weight associated with outcome | Study Pop. | Attr. | Prog. Meas. | Outc. Meas. | Conf. | Stats. |
|-----------------------------------------------------|--------------------------------------------------------------------------|--------------------------------|------------|-------|-------------|-------------|-------|--------|
| Polachek (2017) [Prospective cohort] <sup>406</sup> | Enthesitis occurrence, HR (95% CI)<br>BMI: 1.04 (1.005, 1.07) [adjusted] | ✓                              | L          | L     | L           | L           | L     | M      |
| Haddad (2013) [Case-control] <sup>412</sup>         | DISH, OR (95% CI)<br>BMI cont.: 1.18 (1.09, 1.28) [adjusted]             | ✓                              | L          | L     | L           | L           | L     | M      |

Attr. = attrition, BMI = body mass index, CI = confidence interval, Conf. = confounding, DISH = Diffuse Idiopathic Skeletal Hyperostosis, HR = hazard ratio, L = low risk of bias, M = moderate risk of bias, OR = odds ratio, Outc. Meas = outcome measurement, Prog. Meas. = prognostic factor measurement, Pros = prospective, PsA = psoriatic arthritis, Rand. Seq. = random sequence generation, Stats. = statistical analysis, Study Pop. = study population

## Supplementary table 170 – Drug discontinuation outcomes from observational studies in PsA

Table – Drug discontinuation (PsA), results and quality assessment of observational studies

| Study (date) [study type]                        | Results                                                                    | Weight associated with outcome | Study Pop. | Attr. | Prog. Meas. | Outc. Meas. | Conf. | Stats. |
|--------------------------------------------------|----------------------------------------------------------------------------|--------------------------------|------------|-------|-------------|-------------|-------|--------|
| Mease (2015) [Prospective cohort] <sup>409</sup> | TNF persistence, HR (p value)<br>BMI continuous: 1.011 (p=0.44) [adjusted] | ✗                              | L          | M     | L           | L           | L     | M      |

Attr. = attrition, BMI = body mass index, CI = confidence interval, Conf. = confounding, HR = hazard ratio, L = low risk of bias, M = moderate risk of bias, Outc. Meas = outcome measurement, Prog. Meas. = prognostic factor measurement, Pros = prospective, PsA = psoriatic arthritis, Stats. = statistical analysis, Study Pop. = study population, TNFi = tumour necrosis factor inhibitor

## Supplementary table 171 – Description of studies of assessing weight and outcomes in SSc

Table – Systemic sclerosis, description of included studies

| Author (date) [country]              | Study design | Inclusion criteria                                                                                                                                                                                                                                 | Exposure detail                                                         | N   | Age, mean (SD) years            | N (%) female                        | Funders                                                                                          |
|--------------------------------------|--------------|----------------------------------------------------------------------------------------------------------------------------------------------------------------------------------------------------------------------------------------------------|-------------------------------------------------------------------------|-----|---------------------------------|-------------------------------------|--------------------------------------------------------------------------------------------------|
| Marini (2016) [Italy] <sup>413</sup> | Pros. Cohort | SSc ACR/EULAR criteria with pulmonary artery hypertension (HAP)"                                                                                                                                                                                   | BMI quartiles                                                           | 49  | Died: 62 (13)<br>Alive: 63 (12) | Died: 15 (88.2)<br>Alive: 26 (81.3) | <b>Not reported</b> – authors declared no conflict of interest                                   |
| Assassi (2009) [USA] <sup>414</sup>  | Pros. Cohort | GENIOS study – aged ≥18 years, ACR 1980 SSc criteria, disease duration <5 years, defined ethnicity with all 4 grandparents from the same ethnic group<br>Exclusions: SSc like illnesses associated with environmental, ingested or injected agents | BMI categories:<br>BMI 18.5-24.9<br>BMI 25-29.9<br>BMI >30<br>BMI <18.5 | 250 | 48.9 (13.2)                     | 84%                                 | <b>Government</b> (NIH), <b>University</b> (University of Texas), <b>Professional body</b> (ACR) |

ACR = American College of Rheumatology, BMI = body mass index, EULAR = European League Against Rheumatism, N = number, NIH = National Institute of Health, pros. = prospective, SD = standard deviation, SSc = systemic sclerosis, USA = United States of America

## Supplementary table 172 – Mortality outcomes from observational studies in SSc

Table – Death (SSc), results and quality assessment of observational studies

| Study (date) [study type]                             | Results                                                                                                                                                                                                                                                                                                                                                                                                                                                                                                                        | Weight associated with outcome | Study Pop. | Attr. | Prog. Meas. | Outc. Meas. | Conf. | Stats. |
|-------------------------------------------------------|--------------------------------------------------------------------------------------------------------------------------------------------------------------------------------------------------------------------------------------------------------------------------------------------------------------------------------------------------------------------------------------------------------------------------------------------------------------------------------------------------------------------------------|--------------------------------|------------|-------|-------------|-------------|-------|--------|
| Marini (2016)<br>[Prospective cohort] <sup>413</sup>  | <p><u>Mortality, HR (95% CI) [unadjusted]</u><br/>           BMI up to 24 months: HR 2.20 (1.19, 4.06)<br/>           BMI up to 72 months: HR 0.95 (0.886, 1.017)</p> <p><u>Percentage survived over 24 months</u><br/>           Obese: 100%<br/>           Overweight: 72.7%<br/>           Normal weight: 58.4%<br/>           Underweight: 40.0%, p=0.031</p> <p><u>Mortality, HR (95% CI) [adjusted]</u><br/>           BMI : 0.89 (0.79, 1.01) up to 24 months<br/>           BMI: 0.93 (0.82, 1.05) up to 72 months</p> | ✓                              | M          | L     | M           | L           | L     | M      |
| Assassi (2009)<br>[Prospective cohort] <sup>414</sup> | <p><u>Mortality, HR (95% CI), adjusted for age</u><br/>           BMI 18.5-24.9: ref<br/>           BMI 25-29.9: 0.53 (0.26, 1.08)<br/>           BMI &gt;30: 0.48 (0.2, 1.17)<br/>           BMI &lt;18.5: 6.12 (2.26, 16.58)</p> <p><u>Mortality, HR (95% CI), further adjusted</u><br/>           ≥25 BMI: ref<br/>           18.5-24.9: 2.39 (1.21, 4.72)<br/>           &lt;18.5: 12.94 (4.32, 38.80)</p>                                                                                                                 | ✓                              | L          | L     | L           | M           | L     | M      |

Attr. = attrition, BMI = body mass index, CI = confidence interval, Conf. = confounding, HR = hazard ratio, L = low risk of bias, M = moderate risk of bias, Outc. Meas = outcome measurement, Prog. Meas. = prognostic factor measurement, Pros = prospective, SD = standard deviation, SSc = systemic sclerosis, Stats. = statistical analysis, Study Pop. = study population

## Supplementary table 173 – Description of studies of assessing weight and outcomes in gout

Table – Gout, description of reviews

| Authors (date)                | Review type | Study type included         | Exposure detail                                                                    | Number of studies included | Funders                                                           |
|-------------------------------|-------------|-----------------------------|------------------------------------------------------------------------------------|----------------------------|-------------------------------------------------------------------|
| Nielsen (2017) <sup>415</sup> | SR          | RCTs, observational studies | Studies reporting on the effect of weight loss in overweight / obese gout patients | 10                         | <b>Charity</b> (Oak Foundation, The will of Mrs Elise Fredriksen) |

RCT = randomised controlled trial, SR = systematic review

Table – Gout, description of included studies

| Author (date) [country]                         | Study design        | Inclusion criteria                                                                                                                                                                                                                                                                                                           | Exposure detail                                                 | N                          | Age, mean (SD) years                                                                      | N (%) female                             | Funders                                                                                          |
|-------------------------------------------------|---------------------|------------------------------------------------------------------------------------------------------------------------------------------------------------------------------------------------------------------------------------------------------------------------------------------------------------------------------|-----------------------------------------------------------------|----------------------------|-------------------------------------------------------------------------------------------|------------------------------------------|--------------------------------------------------------------------------------------------------|
| Dessein (2000) [S. Africa] <sup>416</sup>       | Single arm int.     | Exclusions: biochemical evidence of diabetes, hypothyroidism or renal impairment, coronary artery disease, alcohol consumption in excess of 25 g a day, and current use of equal or less carbohydrate or saturated fat than recommended in the diet. Fewer than 2 gout attacks or could not accurately remember gout attacks | Calorie restriction – 1600 kcal per day                         | 13                         | median (range): 50 (30-62)                                                                | 0 (0)                                    | <b>Industry</b> (Lancet Laboratories)                                                            |
| Nguyen (2017) [USA] <sup>417</sup>              | Pros. Cohort        | Multiple Risk Factor Intervention Trial (MRFIT) - incident gout during the study, 35-57 years, men                                                                                                                                                                                                                           | BMI categories:<br>Obesity: BMI ≥39<br>Percentage change in BMI | 408                        | Not reported                                                                              | 408 (100)                                | <b>Charity</b> (Arthritis Foundation, Rheumatology Research Foundation), <b>Government</b> (NIH) |
| Romero-Talamas (2014) [USA] <sup>418</sup>      | Pros. Cohort        | Morbidly obese, active gout (at least one documented episode / treatment)                                                                                                                                                                                                                                                    | Bariatric surgery                                               | Surgery: 99<br>Control: 56 | Surgery: 52.1 (10.3)<br>Control: 63.3 (11.9)                                              | Surgery: 74 (74.7)<br>Control: 34 (60.7) | <b>Not reported</b>                                                                              |
| Su (2008) [Taiwan] <sup>419</sup>               | Pros. Cohort        | Subjects attending medical centre, primary clinically defined gout                                                                                                                                                                                                                                                           | BMI – continuous                                                | 318                        | Renal function deterioration: 57.2 (13.0)<br>No renal function deterioration: 62.5 (15.0) | 0 (0)                                    | <b>Not reported</b>                                                                              |
| Abhishek (2016) [UK] <sup>420</sup>             | Case-control        | Cases = >2 acute gout attacks in previous 12 months. ACR gout crit.<br>Controls = ≤2 gout attacks in previous 12 months<br>Exclusions: taking urate lowering treatment                                                                                                                                                       | BMI tertiles:<br>T1 = <27.4<br>T2 = 27.4-30.8<br>T3 = >30.8     | 468                        | 62.2 (11.3)                                                                               | 11.5%                                    | <b>Industry</b> (AstraZeneca, Oxford Immunotech)                                                 |
| Alvarez-Nemegyei (2005) [Mexico] <sup>421</sup> | Nested Case-control | Wallace criteria for gout<br>Exclusions: Secondary gout, no measured outcomes                                                                                                                                                                                                                                                | BMI categories<br>BMI >30                                       | 90                         | 54 (12)                                                                                   | 2 (2.2)                                  | <b>Not reported</b>                                                                              |

ACR = American College of Rheumatology, BMI = body mass index, N = number, NIH = National Institute of Health, pros. = prospective, SD = standard deviation, UK = United Kingdom, USA = United States of America

## Supplementary table 174 – Function outcomes from weight-loss interventions in gout

Table – Function (Gout), results and quality assessment

| Study (date) [study type]          | Standardised result, SMD (95% CI) unless otherwise stated | Natural result                                                                                                                                                  | Supports intervention | AMSTAR2 quality | Rand. Seq. | Alloc. Conc. | Blind. Part. | Blind. Asses. |
|------------------------------------|-----------------------------------------------------------|-----------------------------------------------------------------------------------------------------------------------------------------------------------------|-----------------------|-----------------|------------|--------------|--------------|---------------|
| Nielsen (2017) [SR] <sup>415</sup> |                                                           | One study reported reductions in function over time at the same time as weight loss from bariatric surgery. Population included patients with and without gout. | *                     | Moderate        |            |              |              |               |

Alloc. Conc. = allocation concealment, AMSTAR2 = Assessing the Methodological Quality of Systematic Reviews, Blind. Asses. = Blinded assessors, Blind. Part. = blinded participants, CI = confidence interval, H/UC = high / unclear risk of bias, L = low risk of bias, Rand. Seq. = random sequence generation, SMD = Standardised mean difference, SR = systematic review

## Supplementary table 175 – Function outcomes from observational studies in gout

Table – Function (Gout), results and quality assessment of observational studies

| Study (date) [study type]                                   | Results                                                                                                                                                                                                                               | Weight associated with outcome | Study Pop. | Attr. | Prog. Meas. | Outc. Meas. | Conf. | Stats. |
|-------------------------------------------------------------|---------------------------------------------------------------------------------------------------------------------------------------------------------------------------------------------------------------------------------------|--------------------------------|------------|-------|-------------|-------------|-------|--------|
| Alvarez-Nemegyei (2005) [Prospective cohort] <sup>421</sup> | <u>Number (%) of disabled/not disability patients with obesity</u><br>Disabled: 33/42 (78%)<br>Not disabled: 34/48 (70%) p=0.27<br><u>Mean (SD) BMI, disabled/not disabled</u><br>disabled: 31 (4.6)<br>not disabled: 30 (5.3) p=0.36 | *                              | L          | M     | M           | L           | H     | H      |

Attr. = attrition, BMI = body mass index, CI = confidence interval, Conf. = confounding, L = low risk of bias, M = moderate risk of bias, Outc. Meas = outcome measurement, Prog. Meas. = prognostic factor measurement, Pros = prospective, Rand. Seq. = random sequence generation, SD = standard deviation, Stats. = statistical analysis, Study Pop. = study population

## Supplementary table 176 – Uric acid outcomes from weight-loss interventions in gout

Table – Serum uric acid (Gout), results and quality assessment

| Study (date) [study type]                       | Standardised result, SMD (95% CI) unless otherwise stated | Natural result                                                                                                               | Supports intervention | AMSTAR2 quality | Rand. Seq. | Alloc. Conc. | Blind. Part. | Blind. Asses. |
|-------------------------------------------------|-----------------------------------------------------------|------------------------------------------------------------------------------------------------------------------------------|-----------------------|-----------------|------------|--------------|--------------|---------------|
| Nielsen (2017) [SR] <sup>415</sup>              |                                                           | Low to moderate quality evidence for the benefit of weight loss for overweight patient with gout in terms of serum uric acid | ✓                     | Moderate        |            |              |              |               |
| Dessein (2000) [Single arm int.] <sup>416</sup> |                                                           | <u>Serum uric acid, Baseline / 16 weeks, median (SD)</u><br>0.57 (0.10) / 0.47 (0.09) p=0.001                                | ✓                     |                 |            |              |              |               |

Alloc. Conc. = allocation concealment, AMSTAR2 = Assessing the Methodological Quality of Systematic Reviews, Blind. Asses. = Blinded assessors, Blind. Part. = blinded participants, CI = confidence interval, H/UC = high / unclear risk of bias, L = low risk of bias, Rand. Seq. = random sequence generation, SD = standard deviation, SMD = Standardised mean difference, SR = systematic review

## Supplementary table 177 – Uric acid outcomes from observational studies in gout

Table – Uric acid (Gout), results and quality assessment of observational studies

| Study (date) [study type]                                 | Results                                                                                                                               | Weight associated with outcome | Study Pop. | Attr. | Prog. Meas. | Outc. Meas. | Conf. | Stats. |
|-----------------------------------------------------------|---------------------------------------------------------------------------------------------------------------------------------------|--------------------------------|------------|-------|-------------|-------------|-------|--------|
| Romero-Talamas (2014) [Prospective cohort] <sup>418</sup> | <u>Serum uric acid, baseline / 13 months, mean (SD)</u><br>Bariatric surgery: 9.1 (2.0) / 5.6 (2.5)<br>Control: 7.7 (2.0) / 7.0 (1.6) | ✓                              | L          | L     | L           | L           | H     | H      |

Attr. = attrition, CI = confidence interval, Conf. = confounding, L = low risk of bias, M = moderate risk of bias, Outc. Meas = outcome measurement, Prog. Meas. = prognostic factor measurement, Pros = prospective, PsA = psoriatic arthritis, Rand. Seq. = random sequence generation, SD = standard deviation, Stats. = statistical analysis, Study Pop. = study population

## Supplementary table 178 – Gout attack outcomes from weight-loss interventions in gout

Table – Gout attacks (Gout), results and quality assessment

| Study (date) [study type]                       | Standardised result, SMD (95% CI) unless otherwise stated | Natural result                                                                                                            | Supports intervention | AMSTAR2 quality | Rand. Seq. | Alloc. Conc. | Blind. Part. | Blind. Asses. |
|-------------------------------------------------|-----------------------------------------------------------|---------------------------------------------------------------------------------------------------------------------------|-----------------------|-----------------|------------|--------------|--------------|---------------|
| Nielsen (2017) [SR] <sup>415</sup>              |                                                           | Low to moderate quality evidence for the benefit of weight loss for overweight patient with gout in terms of gout attacks | ✓                     | Moderate        |            |              |              |               |
| Dessein (2000) [Single arm int.] <sup>416</sup> |                                                           | <u>Attacks per month, BL / 16 weeks, median (SD)</u><br>2.1 (0.8) / 0.6 (0.7), p=0.002                                    | ✓                     |                 |            |              |              |               |

Alloc. Conc. = allocation concealment, AMSTAR2 = Assessing the Methodological Quality of Systematic Reviews, BL = baseline, Blind. Asses. = Blinded assessors, Blind. Part. = blinded participants, CI = confidence interval, H/UC = high / unclear risk of bias, L = low risk of bias, Rand. Seq. = random sequence generation, SD = standard deviation, SMD = Standardised mean difference, SR = systematic review

## Supplementary table 179 – Gout attack outcomes from observational studies in gout

Table – Gout attacks (Gout), results and quality assessment of observational studies

| Study (date) [study type]                                 | Results                                                                                                                                                                                                                                                                                   | Weight associated with outcome | Study Pop. | Attr. | Prog. Meas. | Outc. Meas. | Conf. | Stats. |
|-----------------------------------------------------------|-------------------------------------------------------------------------------------------------------------------------------------------------------------------------------------------------------------------------------------------------------------------------------------------|--------------------------------|------------|-------|-------------|-------------|-------|--------|
| Nguyen (2017) [Prospective cohort] <sup>417</sup>         | <u>Recurrent gout attacks, OR (95% CI)</u><br>BL BMI: 0.98 (0.53, 1.81)<br>decrease >5% BMI: 0.61 (0.32, 1.16)<br>decrease 3.6-5% BMI: 0.94 (0.43, 2.06)<br>no change (-3.5% to 3.5%): ref<br>increase 3.6%-5%: 1.43 (0.75, 2.72)<br>increase >5%: 1.60 (0.89, 2.89)<br>p for trend <0.01 | ✓                              | L          | L     | L           | L           | L     | M      |
| Romero-Talamas (2014) [Prospective cohort] <sup>418</sup> | <u>Gout attacks (%), number from surgery to 12 months</u><br>Bariatric surgery: 8.0%<br>Control: 11.1%                                                                                                                                                                                    | ✓                              | L          | L     | L           | L           | H     | H      |
| Abhishek (2016) [Case-control] <sup>420</sup>             | <u>Gout attacks, Tertile 1 = ref, OR (95%CI)</u><br>unadjusted<br>Tertile 2 = 1.42 (0.91, 2.23)<br>Tertile 3 = 1.72 (1.10, 2.70)<br>adjusted<br>Tertile 2 = 1.44 (0.90, 2.31)<br>Tertile 3 = 1.53 (0.95, 2.46)                                                                            | ✗                              | L          | L     | L           | H           | L     | L      |

Attr. = attrition, BL = baseline, BMI = body mass index, CI = confidence interval, Conf. = confounding, L = low risk of bias, M = moderate risk of bias, OR = odds ratio, Outc. Meas = outcome measurement, Prog. Meas. = prognostic factor measurement, SD = standard deviation, Stats. = statistical analysis, Study Pop. = study population



## Supplementary table 180 – Comorbidity outcomes from observational studies in gout

Table – Comorbidity (Gout), results and quality assessment of observational studies

| Study (date) [study type]                                   | Results                                                                                                                                                                                                                                                                                     | Weight associated with outcome   | Study Pop. | Attr. | Prog. Meas. | Outc. Meas. | Conf. | Stats. |
|-------------------------------------------------------------|---------------------------------------------------------------------------------------------------------------------------------------------------------------------------------------------------------------------------------------------------------------------------------------------|----------------------------------|------------|-------|-------------|-------------|-------|--------|
| Su (2008) [Prospective cohort] <sup>419</sup>               | <u>Mean baseline BMI (SD)</u><br>Renal failure: 27.69 (4.53)<br>No renal failure: 26.16 (3.66) p=0.111<br>BMI not included in multivariable model, in neither logistic and Cox regression analysis<br><u>Multivariable logistic regression</u><br>Waist circumference: 1.058 (1.009, 1.110) | BMI: ✗<br>Waist circumference: ✓ | L          | L     | L           | L           | M     | M      |
| Alvarez-Nemegyei (2005) [Prospective cohort] <sup>421</sup> | <u>Number (%) of renal failure/no failure patients with obesity</u><br>Renal failure: 18/25 (72%)<br>No renal failure: 43/55 (78%) p=0.54<br><u>Mean (SD) BMI, renal failure/no failure</u><br>Renal failure: 29 (3)<br>No renal failure: 30 (4) p=0.35                                     | ✗                                | L          | M     | M           | L           | H     | H      |

Attr. = attrition, BMI = body mass index, CI = confidence interval, Conf. = confounding, L = low risk of bias, M = moderate risk of bias, Outc. Meas = outcome measurement, Prog. Meas. = prognostic factor measurement, Pros = prospective, SD = standard deviation, Stats. = statistical analysis, Study Pop. = study population

## Reference List

- (1) Mease PJ. Measures of psoriatic arthritis: Tender and Swollen Joint Assessment, Psoriasis Area and Severity Index (PASI), Nail Psoriasis Severity Index (NAPSI), Modified Nail Psoriasis Severity Index (mNAPSI), Mander/Newcastle Enthesitis Index (MEI), Leeds Enthesitis Index (LEI), Spondyloarthritis Research Consortium of Canada (SPARCC), Maastricht Ankylosing Spondylitis Enthesis Score (MASES), Leeds Dactylitis Index (LDI), Patient Global for Psoriatic Arthritis, Dermatology Life Quality Index (DLQI), Psoriatic Arthritis Quality of Life (PsAQOL), Functional Assessment of Chronic Illness Therapy-Fatigue (FACIT-F), Psoriatic Arthritis Response Criteria (PsARC), Psoriatic Arthritis Joint Activity Index (PsAJAI), Disease Activity in Psoriatic Arthritis (DAPSA), and Composite Psoriatic Disease Activity Index (CPDAI). *Arthritis Care Res (Hoboken)* 2011; 63 Suppl 11:S64-S85.
  - (2) Zochling J. Measures of symptoms and disease status in ankylosing spondylitis: Ankylosing Spondylitis Disease Activity Score (ASDAS), Ankylosing Spondylitis Quality of Life Scale (ASQoL), Bath Ankylosing Spondylitis Disease Activity Index (BASDAI), Bath Ankylosing Spondylitis Functional Index (BASFI), Bath Ankylosing Spondylitis Global Score (BAS-G), Bath Ankylosing Spondylitis Metrology Index (BASMI), Dougados Functional Index (DFI), and Health Assessment Questionnaire for the Spondylarthropathies (HAQ-S). *Arthritis Care Res (Hoboken)* 2011; 63 Suppl 11:S47-S58.
  - (3) Romero-Diaz J, Isenberg D, Ramsey-Goldman R. Measures of adult systemic lupus erythematosus: updated version of British Isles Lupus Assessment Group (BILAG 2004), European Consensus Lupus Activity Measurements (ECLAM), Systemic Lupus Activity Measure, Revised (SLAM-R), Systemic Lupus Activity Questionnaire for Population Studies (SLAQ), Systemic Lupus Erythematosus Disease Activity Index 2000 (SLEDAI-2K), and Systemic Lupus International Collaborating Clinics/American College of Rheumatology Damage Index (SDI). *Arthritis Care Res (Hoboken)* 2011; 63 Suppl 11:S37-S46.
  - (4) Khanna D, Lovell DJ, Giannini E, Clements PJ, Merkel PA, Seibold JR et al. Development of a provisional core set of response measures for clinical trials of systemic sclerosis. *Ann Rheum Dis* 2008; 67(5):703-709.
  - (5) Taylor WJ, Schumacher HR, Jr., Singh JA, Grainger R, Dalbeth N. Assessment of outcome in clinical trials of gout--a review of current measures. *Rheumatology (Oxford)* 2007; 46(12):1751-1756.
  - (6) Dalbeth N, McQueen FM, Singh JA, MacDonald PA, Edwards NL, Schumacher HR, Jr. et al. Tophus measurement as an outcome measure for clinical trials of chronic gout: progress and research priorities. *J Rheumatol* 2011; 38(7):1458-1461.
  - (7) Andrews JS, Trupin L, Schmajuk G, Barton J, Margaretten M, Yazdany J et al. Muscle strength, muscle mass, and physical disability in women with systemic lupus erythematosus. *Arthritis Care Res (Hoboken)* 2015; 67(1):120-127.
  - (8) Alvarez-Hernandez E, Pelaez-Ballestas I, Vazquez-Mellado J, Teran-Estrada L, Bernard-Medina AG, Espinoza J et al. Validation of the Health Assessment Questionnaire disability index in patients with gout. *Arthritis Rheum* 2008; 59(5):665-669.
  - (9) OARSI. Outcome Measures [<https://www.oarsi.org/research/outcome-measures>]. 2013. 14-5-2018.
- Ref Type: Online Source

- (10) Singh JA, Taylor WJ, Simon LS, Khanna PP, Stamp LK, McQueen FM et al. Patient-reported outcomes in chronic gout: a report from OMERACT 10. *J Rheumatol* 2011; 38(7):1452-1457.
- (11) Whalley D, McKenna SP, de JZ, van der Heijde D. Quality of life in rheumatoid arthritis. *Br J Rheumatol* 1997; 36(8):884-888.
- (12) Doward LC, Spoorenberg A, Cook SA, Whalley D, Helliwell PS, Kay LJ et al. Development of the ASQoL: a quality of life instrument specific to ankylosing spondylitis. *Ann Rheum Dis* 2003; 62(1):20-26.
- (13) McKenna SP, Doward LC, Whalley D, Tennant A, Emery P, Veale DJ. Development of the PsAQoL: a quality of life instrument specific to psoriatic arthritis. *Ann Rheum Dis* 2004; 63(2):162-169.
- (14) Juhl C, Christensen R, Roos EM, Zhang W, Lund H. Impact of exercise type and dose on pain and disability in knee osteoarthritis: a systematic review and meta-regression analysis of randomized controlled trials. *Arthritis Rheumatol* 2014; 66(3):622-636.
- (15) Corbett MS, Rice SJ, Madurasinghe V, Slack R, Fayter DA, Harden M et al. Acupuncture and other physical treatments for the relief of pain due to osteoarthritis of the knee: network meta-analysis. *Osteoarthritis Cartilage* 2013; 21(9):1290-1298.
- (16) Tanaka R, Ozawa J, Kito N, Moriyama H. Efficacy of strengthening or aerobic exercise on pain relief in people with knee osteoarthritis: a systematic review and meta-analysis of randomized controlled trials. *Clin Rehabil* 2013; 27(12):1059-1071.
- (17) Uthman OA, van der Windt DA, Jordan JL, Dziedzic KS, Healey EL, Peat GM et al. Exercise for lower limb osteoarthritis: systematic review incorporating trial sequential analysis and network meta-analysis. *BMJ* 2013; 347:f5555.
- (18) Pozzobon D, Ferreira PH, Blyth FM, Machado GC, Ferreira ML. Can obesity and physical activity predict outcomes of elective knee or hip surgery due to osteoarthritis? A meta-analysis of cohort studies. *BMJ Open* 2018; 8(2):e017689.
- (19) Wijnen A, Bouma SE, Seeber GH, van der Woude LHV, Bulstra SK, Lazovic D et al. The therapeutic validity and effectiveness of physiotherapeutic exercise following total hip arthroplasty for osteoarthritis: A systematic review. *PLoS One* 2018; 13(3):e0194517.
- (20) Alrushud AS, Rushton AB, Kanavaki AM, Greig CA. Effect of physical activity and dietary restriction interventions on weight loss and the musculoskeletal function of overweight and obese older adults with knee osteoarthritis: a systematic review and mixed method data synthesis. *BMJ Open* 2017; 7(6):e014537.
- (21) Brosseau L, Taki J, Desjardins B, Thevenot O, Fransen M, Wells GA et al. The Ottawa panel clinical practice guidelines for the management of knee osteoarthritis. Part three: aerobic exercise programs. *Clin Rehabil* 2017; 31(5):612-624.
- (22) de Rooij M., van der Leeden M, Heymans MW, Holla JF, Hakkinen A, Lems WF et al. Prognosis of Pain and Physical Functioning in Patients With Knee Osteoarthritis: A Systematic Review and Meta-Analysis. *Arthritis Care Res (Hoboken )* 2016; 68(4):481-492.
- (23) Bastick AN, Belo JN, Runhaar J, Bierma-Zeinstra SM. What Are the Prognostic Factors for Radiographic Progression of Knee Osteoarthritis? A Meta-analysis. *Clin Orthop Relat Res* 2015; 473(9):2969-2989.

- (24) Le Quintrec JL, Verlhac B, Cadet C, Breville P, Vetel JM, Gauvain JB et al. Physical exercise and weight loss for hip and knee osteoarthritis in very old patients: a systematic review of the literature. *Open Rheumatol J* 2014; 8:89-95.
- (25) Messier SP, Loeser RF, Miller GD, Morgan TM, Rejeski WJ, Sevick MA et al. Exercise and dietary weight loss in overweight and obese older adults with knee osteoarthritis: the Arthritis, Diet, and Activity Promotion Trial. *Arthritis Rheum* 2004; 50(5):1501-1510.
- (26) Messier SP, Mihalko SL, Legault C, Miller GD, Nicklas BJ, DeVita P et al. Effects of intensive diet and exercise on knee joint loads, inflammation, and clinical outcomes among overweight and obese adults with knee osteoarthritis: the IDEA randomized clinical trial. *JAMA* 2013; 310(12):1263-1273.
- (27) Beumer L, Wong J, Warden SJ, Kemp JL, Foster P, Crossley KM. Effects of exercise and manual therapy on pain associated with hip osteoarthritis: a systematic review and meta-analysis. *Br J Sports Med* 2016; 50(8):458-463.
- (28) Bartels EM, Juhl CB, Christensen R, Hagen KB, Danneskiold-Samsøe B, Dagfinrud H et al. Aquatic exercise for the treatment of knee and hip osteoarthritis. *Cochrane Database Syst Rev* 2016; 3:CD005523.
- (29) Lu M, Su Y, Zhang Y, Zhang Z, Wang W, He Z et al. Effectiveness of aquatic exercise for treatment of knee osteoarthritis: Systematic review and meta-analysis. *Z Rheumatol* 2015; 74(6):543-552.
- (30) Waller B, Ogonowska-Slodownik A, Vitor M, Lambeck J, Daly D, Kujala UM et al. Effect of therapeutic aquatic exercise on symptoms and function associated with lower limb osteoarthritis: systematic review with meta-analysis. *Phys Ther* 2014; 94(10):1383-1395.
- (31) McAlindon TE, Bannuru RR, Sullivan MC, Arden NK, Berenbaum F, Bierma-Zeinstra SM et al. OARSI guidelines for the non-surgical management of knee osteoarthritis. *Osteoarthritis Cartilage* 2014; 22(3):363-388.
- (32) Romeo A, Parazza S, Boschi M, Nava T, Vanti C. Manual therapy and therapeutic exercise in the treatment of osteoarthritis of the hip: a systematic review. *Reumatismo* 2013; 65(2):63-74.
- (33) Bartels EM, Lund H, Hagen KB, Dagfinrud H, Christensen R, Danneskiold-Samsøe B. Aquatic exercise for the treatment of knee and hip osteoarthritis. *Cochrane Database Syst Rev* 2007;(4):CD005523.
- (34) Gay C, Chabaud A, Guilley E, Coudeyre E. Educating patients about the benefits of physical activity and exercise for their hip and knee osteoarthritis. Systematic literature review. *Ann Phys Rehabil Med* 2016; 59(3):174-183.
- (35) Nelson AE, Allen KD, Golightly YM, Goode AP, Jordan JM. A systematic review of recommendations and guidelines for the management of osteoarthritis: The chronic osteoarthritis management initiative of the U.S. bone and joint initiative. *Semin Arthritis Rheum* 2014; 43(6):701-712.
- (36) Fernandes L, Hagen KB, Bijlsma JW, Andreassen O, Christensen P, Conaghan PG et al. EULAR recommendations for the non-pharmacological core management of hip and knee osteoarthritis. *Ann Rheum Dis* 2013; 72(7):1125-1135.

- (37) Regnaud JP, Lefevre-Colau MM, Trinquart L, Nguyen C, Boutron I, Brosseau L et al. High-intensity versus low-intensity physical activity or exercise in people with hip or knee osteoarthritis. *Cochrane Database Syst Rev* 2015;(10):CD010203.
- (38) de Rooij M., van der Leeden M, Heymans MW, Holla JF, Hakkinen A, Lems WF et al. Course and predictors of pain and physical functioning in patients with hip osteoarthritis: Systematic review and meta-analysis. *J Rehabil Med* 2016; 48(3):245-252.
- (39) Anwer S, Alghadir A, Brismee JM. Effect of Home Exercise Program in Patients With Knee Osteoarthritis: A Systematic Review and Meta-analysis. *J Geriatr Phys Ther* 2016; 39(1):38-48.
- (40) Moseng T, Dagfinrud H, Smedslund G, Osteras N. The importance of dose in land-based supervised exercise for people with hip osteoarthritis. A systematic review and meta-analysis. *Osteoarthritis Cartilage* 2017; 25(10):1563-1576.
- (41) Fernandopulle S, Perry M, Manlapaz D, Jayakaran P. Effect of Land-Based Generic Physical Activity Interventions on Pain, Physical Function, and Physical Performance in Hip and Knee Osteoarthritis: A Systematic Review and Meta-Analysis. *Am J Phys Med Rehabil* 2017; 96(11):773-792.
- (42) Henriksen M, Hansen JB, Klokke L, Bliddal H, Christensen R. Comparable effects of exercise and analgesics for pain secondary to knee osteoarthritis: a meta-analysis of trials included in Cochrane systematic reviews. *J Comp Eff Res* 2016; 5(4):417-431.
- (43) Fransen M, McConnell S, Harmer AR, Van der Esch M, Simic M, Bennell KL. Exercise for osteoarthritis of the knee. *Cochrane Database Syst Rev* 2015; 1:CD004376.
- (44) Aebischer B, Elsig S, Taeymans J. Effectiveness of physical and occupational therapy on pain, function and quality of life in patients with trapeziometacarpal osteoarthritis - A systematic review and meta-analysis. *Hand Ther* 2016; 21(1):5-15.
- (45) Finney A, Healey E, Jordan JL, Ryan S, Dziedzic KS. Multidisciplinary approaches to managing osteoarthritis in multiple joint sites: a systematic review. *BMC Musculoskelet Disord* 2016; 17:266.
- (46) Bartholdy C, Juhl C, Christensen R, Lund H, Zhang W, Henriksen M. The role of muscle strengthening in exercise therapy for knee osteoarthritis: A systematic review and meta-regression analysis of randomized trials. *Semin Arthritis Rheum* 2017; 47(1):9-21.
- (47) Magni NE, McNair PJ, Rice DA. The effects of resistance training on muscle strength, joint pain, and hand function in individuals with hand osteoarthritis: a systematic review and meta-analysis. *Arthritis Res Ther* 2017; 19(1):131.
- (48) Osteras N, Kjekken I, Smedslund G, Moe RH, Slatkowsky-Christensen B, Uhlig T et al. Exercise for hand osteoarthritis. *Cochrane Database Syst Rev* 2017; 1:CD010388.
- (49) Coudeyre E, Jegu AG, Giustanini M, Marrel JP, Edouard P, Pereira B. Isokinetic muscle strengthening for knee osteoarthritis: A systematic review of randomized controlled trials with meta-analysis. *Ann Phys Rehabil Med* 2016; 59(3):207-215.

- (50) Li Y, Su Y, Chen S, Zhang Y, Zhang Z, Liu C et al. The effects of resistance exercise in patients with knee osteoarthritis: a systematic review and meta-analysis. *Clin Rehabil* 2016; 30(10):947-959.
- (51) Brosseau L, Taki J, Desjardins B, Thevenot O, Fransen M, Wells GA et al. The Ottawa panel clinical practice guidelines for the management of knee osteoarthritis. Part two: strengthening exercise programs. *Clin Rehabil* 2017; 31(5):596-611.
- (52) Brosseau L, Wells GA, Pugh AG, Smith CA, Rahman P, Alvarez Gallardo IC et al. Ottawa Panel evidence-based clinical practice guidelines for therapeutic exercise in the management of hip osteoarthritis. *Clin Rehabil* 2016; 30(10):935-946.
- (53) Briani RV, Ferreira AS, Pazzinatto MF, Pappas E, De Oliveira SD, Azevedo FM. What interventions can improve quality of life or psychosocial factors of individuals with knee osteoarthritis? A systematic review with meta-analysis of primary outcomes from randomised controlled trials. *Br J Sports Med* 2018; 52(16):1031-1038.
- (54) Hurley M, Dickson K, Hallett R, Grant R, Hauari H, Walsh N et al. Exercise interventions and patient beliefs for people with hip, knee or hip and knee osteoarthritis: a mixed methods review. *Cochrane Database Syst Rev* 2018; 4:CD010842.
- (55) Sampath KK, Mani R, Miyamori T, Tumilty S. The effects of manual therapy or exercise therapy or both in people with hip osteoarthritis: a systematic review and meta-analysis. *Clin Rehabil* 2016; 30(12):1141-1155.
- (56) Bertozzi L, Valdes K, Vanti C, Negrini S, Pillastrini P, Villafane JH. Investigation of the effect of conservative interventions in thumb carpometacarpal osteoarthritis: systematic review and meta-analysis. *Disabil Rehabil* 2015; 37(22):2025-2043.
- (57) Desveaux L, Beauchamp M, Goldstein R, Brooks D. Community-based exercise programs as a strategy to optimize function in chronic disease: a systematic review. *Med Care* 2014; 52(3):216-226.
- (58) Ferreira GE, Robinson CC, Wiebusch M, Viero CC, da Rosa LH, Silva MF. The effect of exercise therapy on knee adduction moment in individuals with knee osteoarthritis: A systematic review. *Clin Biomech (Bristol, Avon)* 2015; 30(6):521-527.
- (59) Fehring TK, Fehring K, Odum SM, Halsey D. Physical therapy mandates by Medicare administrative contractors: effective or wasteful? *J Arthroplasty* 2013; 28(9):1459-1462.
- (60) Zhang Y, Huang L, Su Y, Zhan Z, Li Y, Lai X. The Effects of Traditional Chinese Exercise in Treating Knee Osteoarthritis: A Systematic Review and Meta-Analysis. *PLoS One* 2017; 12(1):e0170237.
- (61) Chen YW, Hunt MA, Campbell KL, Peill K, Reid WD. The effect of Tai Chi on four chronic conditions-cancer, osteoarthritis, heart failure and chronic obstructive pulmonary disease: a systematic review and meta-analyses. *Br J Sports Med* 2016; 50(7):397-407.
- (62) Yan JH, Gu WJ, Sun J, Zhang WX, Li BW, Pan L. Efficacy of Tai Chi on pain, stiffness and function in patients with osteoarthritis: a meta-analysis. *PLoS One* 2013; 8(4):e61672.

- (63) Brosseau L, Taki J, Desjardins B, Thevenot O, Fransen M, Wells GA et al. The Ottawa panel clinical practice guidelines for the management of knee osteoarthritis. Part one: introduction, and mind-body exercise programs. *Clin Rehabil* 2017; 31(5):582-595.
- (64) Wang Y, Lu S, Wang R, Jiang P, Rao F, Wang B et al. Integrative effect of yoga practice in patients with knee arthritis: A PRISMA-compliant meta-analysis. *Medicine (Baltimore)* 2018; 97(31):e11742.
- (65) Kan L, Zhang J, Yang Y, Wang P. The Effects of Yoga on Pain, Mobility, and Quality of Life in Patients with Knee Osteoarthritis: A Systematic Review. *Evid Based Complement Alternat Med* 2016; 2016:6016532.
- (66) Cramer H, Lauche R, Langhorst J, Dobos G. Yoga for rheumatic diseases: a systematic review. *Rheumatology (Oxford)* 2013; 52(11):2025-2030.
- (67) Rongen-van Dartel SA, Repping-Wuts H, Flendrie M, Bleijenberg G, Metsios GS, van den Hout WB et al. Effect of Aerobic Exercise Training on Fatigue in Rheumatoid Arthritis: A Meta-Analysis. *Arthritis Care Res (Hoboken)* 2015; 67(8):1054-1062.
- (68) Hernandez-Hernandez MV, Diaz-Gonzalez F. Role of physical activity in the management and assessment of rheumatoid arthritis patients. *Reumatol Clin* 2017; 13(4):214-220.
- (69) Siegel P, Tencza M, Apodaca B, Poole JL. Effectiveness of Occupational Therapy Interventions for Adults With Rheumatoid Arthritis: A Systematic Review. *Am J Occup Ther* 2017; 71(1):7101180050p1-7101180050p11.
- (70) Larkin L, Kennedy N. Correlates of physical activity in adults with rheumatoid arthritis: a systematic review. *J Phys Act Health* 2014; 11(6):1248-1261.
- (71) Katz P, Margaretten M, Gregorich S, Trupin L. Physical Activity to Reduce Fatigue in Rheumatoid Arthritis: A Randomized Controlled Trial. *Arthritis Care Res (Hoboken)* 2018; 70(1):1-10.
- (72) Baxter SV, Hale LA, Stebbings S, Gray AR, Smith CM, Treharne GJ. Walking is a Feasible Physical Activity for People with Rheumatoid Arthritis: A Feasibility Randomized Controlled Trial. *Musculoskeletal Care* 2016; 14(1):47-56.
- (73) Feldthusen C, Dean E, Forsblad-d'Elia H, Mannerkorpi K. Effects of Person-Centered Physical Therapy on Fatigue-Related Variables in Persons With Rheumatoid Arthritis: A Randomized Controlled Trial. *Arch Phys Med Rehabil* 2016; 97(1):26-36.
- (74) Sjoquist ES, Brodin N, Lampa J, Jensen I, Opava CH. Physical activity coaching of patients with rheumatoid arthritis in everyday practice: a long-term follow-up. *Musculoskeletal Care* 2011; 9(2):75-85.
- (75) Brodin N, Eurenus E, Jensen I, Nisell R, Opava CH. Coaching patients with early rheumatoid arthritis to healthy physical activity: a multicenter, randomized, controlled study. *Arthritis Rheum* 2008; 59(3):325-331.
- (76) Li LC, Davis AM, Lineker SC, Coyte PC, Bombardier C. Effectiveness of the primary therapist model for rheumatoid arthritis rehabilitation: a randomized controlled trial. *Arthritis Rheum* 2006; 55(1):42-52.

- (77) Melikoglu MA, Karatay S, Senel K, Akcay F. Association between dynamic exercise therapy and IGF-1 and IGFBP-3 concentrations in the patients with rheumatoid arthritis. *Rheumatol Int* 2006; 26(4):309-313.
- (78) Hansen TM, Hansen G, Langgaard AM, Rasmussen JO. Longterm physical training in rheumatoid arthritis. A randomized trial with different training programs and blinded observers. *Scand J Rheumatol* 1993; 22(3):107-112.
- (79) Nordstrom DC, Konttinen YT, Solovieva S, Friman C, Santavirta S. In- and out-patient rehabilitation in rheumatoid arthritis. A controlled, open, longitudinal, cost-effectiveness study. *Scand J Rheumatol* 1996; 25(4):200-206.
- (80) Minor MA, Hewett JE. Physical fitness and work capacity in women with rheumatoid arthritis. *Arthritis Care Res* 1995; 8(3):146-154.
- (81) Noreau L, Martineau H, Roy L, Belzile M. Effects of a modified dance-based exercise on cardiorespiratory fitness, psychological state and health status of persons with rheumatoid arthritis. *Am J Phys Med Rehabil* 1995; 74(1):19-27.
- (82) Ekblom B, Lovgren O, Alderin M, Fridstrom M, Satterstrom G. Effect of short-term physical training on patients with rheumatoid arthritis. a six-month follow-up study. *Scand J Rheumatol* 1975; 4(2):87-91.
- (83) Nadareishvili Z, Michaud K, Hallenbeck JM, Wolfe F. Cardiovascular, rheumatologic, and pharmacologic predictors of stroke in patients with rheumatoid arthritis: a nested, case-control study. *Arthritis Rheum* 2008; 59(8):1090-1096.
- (84) Wolfe F, Michaud K. The risk of myocardial infarction and pharmacologic and nonpharmacologic myocardial infarction predictors in rheumatoid arthritis: a cohort and nested case-control analysis. *Arthritis Rheum* 2008; 58(9):2612-2621.
- (85) Stenstrom CH. Radiologically observed progression of joint destruction and its relationship with demographic factors, disease severity, and exercise frequency in patients with rheumatoid arthritis. *Phys Ther* 1994; 74(1):32-39.
- (86) Baillet A, Zeboulon N, Gossec L, Combescure C, Bodin LA, Juvin R et al. Efficacy of cardiorespiratory aerobic exercise in rheumatoid arthritis: meta-analysis of randomized controlled trials. *Arthritis Care Res (Hoboken)* 2010; 62(7):984-992.
- (87) Wan X, Wang W, Liu J, Tong T. Estimating the sample mean and standard deviation from the sample size, median, range and/or interquartile range. *BMC Med Res Methodol* 2014; 14:135.
- (88) Lange E, Kucharski D, Svedlund S, Svensson K, Bertholds G, Gjertsson I et al. Effects of Aerobic and Resistance Exercise in Older Adults With Rheumatoid Arthritis: A Randomized Controlled Trial. *Arthritis Care Res (Hoboken)* 2019; 71(1):61-70.
- (89) Durcan L, Wilson F, Cunnane G. The effect of exercise on sleep and fatigue in rheumatoid arthritis: a randomized controlled study. *J Rheumatol* 2014; 41(10):1966-1973.
- (90) Breedland I, van Scheppingen C., Leijmsa M, Verheij-Jansen NP, van Weert E. Effects of a group-based exercise and educational program on physical performance and disease self-management in rheumatoid arthritis: a randomized controlled study. *Phys Ther* 2011; 91(6):879-893.



- (91) Hurkmans EJ, van den Berg MH, Runday KH, Peeters AJ, le CS, Vlieland TP. Maintenance of physical activity after Internet-based physical activity interventions in patients with rheumatoid arthritis. *Rheumatology (Oxford)* 2010; 49(1):167-172.
- (92) van den Berg MH, Runday HK, Peeters AJ, le CS, van der Giesen FJ, Breedveld FC et al. Using internet technology to deliver a home-based physical activity intervention for patients with rheumatoid arthritis: A randomized controlled trial. *Arthritis Rheum* 2006; 55(6):935-945.
- (93) Flint-Wagner HG, Lisse J, Lohman TG, Going SB, Guido T, Cussler E et al. Assessment of a sixteen-week training program on strength, pain, and function in rheumatoid arthritis patients. *J Clin Rheumatol* 2009; 15(4):165-171.
- (94) Bulthuis Y, Drossaers-Bakker KW, Taal E, Rasker J, Oostveen J, van't Pad BP et al. Arthritis patients show long-term benefits from 3 weeks intensive exercise training directly following hospital discharge. *Rheumatology (Oxford)* 2007; 46(11):1712-1717.
- (95) Neuberger GB, Aaronson LS, Gajewski B, Embretson SE, Cagle PE, Loudon JK et al. Predictors of exercise and effects of exercise on symptoms, function, aerobic fitness, and disease outcomes of rheumatoid arthritis. *Arthritis Rheum* 2007; 57(6):943-952.
- (96) Munneke M, de JZ, Zwiderman AH, Runday HK, van SD, Dijkmans BA et al. Effect of a high-intensity weight-bearing exercise program on radiologic damage progression of the large joints in subgroups of patients with rheumatoid arthritis. *Arthritis Rheum* 2005; 53(3):410-417.
- (97) de Jong Z., Munneke M, Lems WF, Zwiderman AH, Kroon HM, Pauwels EK et al. Slowing of bone loss in patients with rheumatoid arthritis by long-term high-intensity exercise: results of a randomized, controlled trial. *Arthritis Rheum* 2004; 50(4):1066-1076.
- (98) de Jong Z., Munneke M, Zwiderman AH, Kroon HM, Runday KH, Lems WF et al. Long term high intensity exercise and damage of small joints in rheumatoid arthritis. *Ann Rheum Dis* 2004; 63(11):1399-1405.
- (99) Hakkinen A, Sokka T, Hannonen P. A home-based two-year strength training period in early rheumatoid arthritis led to good long-term compliance: a five-year followup. *Arthritis Rheum* 2004; 51(1):56-62.
- (100) Hakkinen A, Sokka T, Kautiainen H, Kotaniemi A, Hannonen P. Sustained maintenance of exercise induced muscle strength gains and normal bone mineral density in patients with early rheumatoid arthritis: a 5 year follow up. *Ann Rheum Dis* 2004; 63(8):910-916.
- (101) de Jong Z., Munneke M, Zwiderman AH, Kroon HM, Jansen A, Runday KH et al. Is a long-term high-intensity exercise program effective and safe in patients with rheumatoid arthritis? Results of a randomized controlled trial. *Arthritis Rheum* 2003; 48(9):2415-2424.
- (102) Westby MD, Wade JP, Rangno KK, Berkowitz J. A randomized controlled trial to evaluate the effectiveness of an exercise program in women with rheumatoid arthritis taking low dose prednisone. *J Rheumatol* 2000; 27(7):1674-1680.
- (103) Hakkinen A, Sokka T, Kotaniemi A, Kautiainen H, Jappinen I, Laitinen L et al. Dynamic strength training in patients with early rheumatoid arthritis increases muscle strength but not bone mineral density. *J Rheumatol* 1999; 26(6):1257-1263.

- (104) Lyngberg KK, Harreby M, Bentzen H, Frost B, Danneskiold-Samsøe B. Elderly rheumatoid arthritis patients on steroid treatment tolerate physical training without an increase in disease activity. *Arch Phys Med Rehabil* 1994; 75(11):1189-1195.
- (105) Ekdahl C, Andersson SI, Moritz U, Svensson B. Dynamic versus static training in patients with rheumatoid arthritis. *Scand J Rheumatol* 1990; 19(1):17-26.
- (106) Lyngberg K, Danneskiold-Samsøe B, Halskov O. The effect of physical training on patients with rheumatoid arthritis: changes in disease activity, muscle strength and aerobic capacity. A clinically controlled minimized cross-over study. *Clin Exp Rheumatol* 1988; 6(3):253-260.
- (107) Nordemar R, Ekblom B, Zachrisson L, Lundqvist K. Physical training in rheumatoid arthritis: a controlled long-term study. I. *Scand J Rheumatol* 1981; 10(1):17-23.
- (108) Nordemar R. Physical training in rheumatoid arthritis: A controlled long-term study. II. Functional capacity and general attitudes. *Scand J Rheumatol* 1981; 10(1):25-30.
- (109) Stavropoulos-Kalinoglou A, Metsios GS, Veldhuijzen van Zanten JJ, Nightingale P, Kitis GD, Koutedakis Y. Individualised aerobic and resistance exercise training improves cardiorespiratory fitness and reduces cardiovascular risk in patients with rheumatoid arthritis. *Ann Rheum Dis* 2013; 72(11):1819-1825.
- (110) Lofgren M, Opava CH, Demmelmaier I, Friden C, Lundberg IE, Nordgren B et al. Long-term, health-enhancing physical activity is associated with reduction of pain but not pain sensitivity or improved exercise-induced hypoalgesia in persons with rheumatoid arthritis. *Arthritis Res Ther* 2018; 20(1):262.
- (111) Nordgren B, Friden C, Demmelmaier I, Bergstrom G, Lundberg IE, Dufour AB et al. An outsourced health-enhancing physical activity programme for people with rheumatoid arthritis: exploration of adherence and response. *Rheumatology (Oxford)* 2015; 54(6):1065-1073.
- (112) Di Gioia L, Zincarelli C, Di Minno MN, Rengo G, Peluso R, Spano A et al. Effectiveness of a rehabilitative programme in improving fatigue and function in rheumatoid arthritis patients treated with biologics: a pilot study. *Clin Exp Rheumatol* 2013; 31(2):285-288.
- (113) Strasser B, Leeb G, Strehblow C, Schobersberger W, Haber P, Cauza E. The effects of strength and endurance training in patients with rheumatoid arthritis. *Clin Rheumatol* 2011; 30(5):623-632.
- (114) van der Giesen FJ, van LW, Hopman-Rock M, de JZ, Munneke M, Hazes JM et al. Exploring the public health impact of an intensive exercise program for patients with rheumatoid arthritis: a dissemination and implementation study. *Arthritis Care Res (Hoboken)* 2010; 62(6):865-872.
- (115) de Jong Z., Munneke M, Kroon HM, van SD, Dijkmans BA, Hazes JM et al. Long-term follow-up of a high-intensity exercise program in patients with rheumatoid arthritis. *Clin Rheumatol* 2009; 28(6):663-671.
- (116) Neuberger GB, Press AN, Lindsley HB, Hinton R, Cagle PE, Carlson K et al. Effects of exercise on fatigue, aerobic fitness, and disease activity measures in persons with rheumatoid arthritis. *Res Nurs Health* 1997; 20(3):195-204.
- (117) Al-Qubaeissy KY, Fatoye FA, Goodwin PC, Yohannes AM. The effectiveness of hydrotherapy in the management of rheumatoid arthritis: a systematic review. *Musculoskeletal Care* 2013; 11(1):3-18.

- (118) Siqueira US, Orsini Valente LG, de Mello MT, Szejnfeld VL, Pinheiro MM. Effectiveness of Aquatic Exercises in Women With Rheumatoid Arthritis: A Randomized, Controlled, 16-Week Intervention-The HydRA Trial. *Am J Phys Med Rehabil* 2017; 96(3):167-175.
- (119) Eversden L, Maggs F, Nightingale P, Jobanputra P. A pragmatic randomised controlled trial of hydrotherapy and land exercises on overall well being and quality of life in rheumatoid arthritis. *BMC Musculoskelet Disord* 2007; 8:23.
- (120) Bilberg A, Ahlmen M, Mannerkorpi K. Moderately intensive exercise in a temperate pool for patients with rheumatoid arthritis: a randomized controlled study. *Rheumatology (Oxford)* 2005; 44(4):502-508.
- (121) Oldfield V, Felson DT. Exercise therapy and orthotic devices in rheumatoid arthritis: evidence-based review. *Curr Opin Rheumatol* 2008; 20(3):353-359.
- (122) Lemmey AB, Williams SL, Marcora SM, Jones J, Maddison PJ. Are the benefits of a high-intensity progressive resistance training program sustained in rheumatoid arthritis patients? A 3-year followup study. *Arthritis Care Res (Hoboken )* 2012; 64(1):71-75.
- (123) Lemmey AB, Marcora SM, Chester K, Wilson S, Casanova F, Maddison PJ. Effects of high-intensity resistance training in patients with rheumatoid arthritis: a randomized controlled trial. *Arthritis Rheum* 2009; 61(12):1726-1734.
- (124) van den Ende CH, Breedveld FC, le CS, Dijkmans BA, de Mug AW, Hazes JM. Effect of intensive exercise on patients with active rheumatoid arthritis: a randomised clinical trial. *Ann Rheum Dis* 2000; 59(8):615-621.
- (125) van den Ende CH, Hazes JM, le CS, Mulder WJ, Belfor DG, Breedveld FC et al. Comparison of high and low intensity training in well controlled rheumatoid arthritis. Results of a randomised clinical trial. *Ann Rheum Dis* 1996; 55(11):798-805.
- (126) Hammond A, Prior Y. The effectiveness of home hand exercise programmes in rheumatoid arthritis: a systematic review. *Br Med Bull* 2016; 119(1):49-62.
- (127) Zernicke J, Kedor C, Muller A, Burmester GR, Reissbauer A, Feist E. A prospective pilot study to evaluate an animated home-based physical exercise program as a treatment option for patients with rheumatoid arthritis. *BMC Musculoskelet Disord* 2016; 17(1):351.
- (128) Seneca T, Hauge EM, Maribo T. Comparable effect of partly supervised and self-administered exercise programme in early rheumatoid arthritis--a randomised, controlled trial. *Dan Med J* 2015; 62(8):A5127.
- (129) Hsieh LF, Chen SC, Chuang CC, Chai HM, Chen WS, He YC. Supervised aerobic exercise is more effective than home aerobic exercise in female chinese patients with rheumatoid arthritis. *J Rehabil Med* 2009; 41(5):332-337.
- (130) Stenstrom CH. Home exercise in rheumatoid arthritis functional class II: goal setting versus pain attention. *J Rheumatol* 1994; 21(4):627-634.
- (131) Crowley L. The effectiveness of home exercise programmes for patients with rheumatoid arthritis: A review of the literature. *Physical Therapy Reviews* 2009; 14:149-159.

- (132) Williams MA, Srikesavan C, Heine PJ, Bruce J, Brosseau L, Hoxey-Thomas N et al. Exercise for rheumatoid arthritis of the hand. *Cochrane Database Syst Rev* 2018; 7:CD003832.
- (133) Daien CI, Hua C, Combe B, Landewe R. Non-pharmacological and pharmacological interventions in patients with early arthritis: a systematic literature review informing the 2016 update of EULAR recommendations for the management of early arthritis. *RMD Open* 2017; 3(1):e000404.
- (134) Bergstra SA, Murgia A, Te Velde AF, Caljouw SR. A systematic review into the effectiveness of hand exercise therapy in the treatment of rheumatoid arthritis. *Clin Rheumatol* 2014; 33(11):1539-1548.
- (135) Lo CN, Xia G, Leung BP. The effect of nerve mobilization exercise in patients with rheumatoid arthritis: a pilot study. *Reumatismo* 2017; 69(3):111-118.
- (136) Williamson E, McConkey C, Heine P, Dosanjh S, Williams M, Lamb SE. Hand exercises for patients with rheumatoid arthritis: an extended follow-up of the SARAH randomised controlled trial. *BMJ Open* 2017; 7(4):e013121.
- (137) Lourenzi FM, Jones A, Pereira DF, Santos JHCA, Furtado RNV, Natour J. Effectiveness of an overall progressive resistance strength program for improving the functional capacity of patients with rheumatoid arthritis: a randomized controlled trial. *Clin Rehabil* 2017; 31(11):1482-1491.
- (138) Lamb SE, Williamson EM, Heine PJ, Adams J, Dosanjh S, Dritsaki M et al. Exercises to improve function of the rheumatoid hand (SARAH): a randomised controlled trial. *Lancet* 2015; 385(9966):421-429.
- (139) Manning VL, Hurley MV, Scott DL, Coker B, Choy E, Bearne LM. Education, self-management, and upper extremity exercise training in people with rheumatoid arthritis: a randomized controlled trial. *Arthritis Care Res (Hoboken)* 2014; 66(2):217-227.
- (140) Dogu B, Sirzai H, Yilmaz F, Polat B, Kuran B. Effects of isotonic and isometric hand exercises on pain, hand functions, dexterity and quality of life in women with rheumatoid arthritis. *Rheumatol Int* 2013; 33(10):2625-2630.
- (141) Baillet A, Payraud E, Niderprim VA, Nissen MJ, Allenet B, Francois P et al. A dynamic exercise programme to improve patients' disability in rheumatoid arthritis: a prospective randomized controlled trial. *Rheumatology (Oxford)* 2009; 48(4):410-415.
- (142) Masiero S, Boniolo A, Wassermann L, Machiedo H, Volante D, Punzi L. Effects of an educational-behavioral joint protection program on people with moderate to severe rheumatoid arthritis: a randomized controlled trial. *Clin Rheumatol* 2007; 26(12):2043-2050.
- (143) O'Brien AV, Jones P, Mullis R, Mulherin D, Dziedzic K. Conservative hand therapy treatments in rheumatoid arthritis--a randomized controlled trial. *Rheumatology (Oxford)* 2006; 45(5):577-583.
- (144) Buljina AI, Taljanovic MS, Avdic DM, Hunter TB. Physical and exercise therapy for treatment of the rheumatoid hand. *Arthritis Rheum* 2001; 45(4):392-397.
- (145) Scholten C, Brodowicz T, Graninger W, Gardavsky I, Pils K, Pesau B et al. Persistent functional and social benefit 5 years after a multidisciplinary arthritis training program. *Arch Phys Med Rehabil* 1999; 80(10):1282-1287.

- (146) Bostrom C, Harms-Ringdahl K, Karreskog H, Nordemar R. Effects of static and dynamic shoulder rotator exercises in women with rheumatoid arthritis: a randomised comparison of impairment, disability, handicap, and health. *Scand J Rheumatol* 1998; 27(4):281-290.
- (147) Komatireddy GR, Leitch RW, Cella K, Browning G, Minor M. Efficacy of low load resistive muscle training in patients with rheumatoid arthritis functional class II and III. *J Rheumatol* 1997; 24(8):1531-1539.
- (148) Hoenig H, Groff G, Pratt K, Goldberg E, Franck W. A randomized controlled trial of home exercise on the rheumatoid hand. *J Rheumatol* 1993; 20(5):785-789.
- (149) Dellhag B, Wollersjo I, Bjelle A. Effect of active hand exercise and wax bath treatment in rheumatoid arthritis patients. *Arthritis Care Res* 1992; 5(2):87-92.
- (150) Marcora SM, Lemmey AB, Maddison PJ. Can progressive resistance training reverse cachexia in patients with rheumatoid arthritis? Results of a pilot study. *J Rheumatol* 2005; 32(6):1031-1039.
- (151) Goksel Karatepe A., Gunaydin R, Turkmen G, Kaya T. Effects of home-based exercise program on the functional status and the quality of life in patients with rheumatoid arthritis: 1-year follow-up study. *Rheumatol Int* 2011; 31(2):171-176.
- (152) Baillet A, Vaillant M, Guinot M, Juvin R, Gaudin P. Efficacy of resistance exercises in rheumatoid arthritis: meta-analysis of randomized controlled trials. *Rheumatology (Oxford)* 2012; 51(3):519-527.
- (153) Wang C. Tai Chi improves pain and functional status in adults with rheumatoid arthritis: results of a pilot single-blinded randomized controlled trial. *Med Sport Sci* 2008; 52:218-229.
- (154) Shin JH, Lee Y, Kim SG, Choi BY, Lee HS, Bang SY. The beneficial effects of Tai Chi exercise on endothelial function and arterial stiffness in elderly women with rheumatoid arthritis. *Arthritis Res Ther* 2015; 17:380.
- (155) Lee HY, Hale CA, Hemingway B, Woolridge MW. Tai Chi exercise and auricular acupressure for people with rheumatoid arthritis: an evaluation study. *J Clin Nurs* 2012; 21(19-20):2812-2822.
- (156) Uhlig T, Fongen C, Steen E, Christie A, Odegard S. Exploring Tai Chi in rheumatoid arthritis: a quantitative and qualitative study. *BMC Musculoskelet Disord* 2010; 11:43.
- (157) Han A, Robinson V, Judd M, Taixiang W, Wells G, Tugwell P. Tai chi for treating rheumatoid arthritis. *Cochrane Database Syst Rev* 2004;(3):CD004849.
- (158) Ward L, Stebbings S, Athens J, Cherkin D, David BG. Yoga for the management of pain and sleep in rheumatoid arthritis: a pilot randomized controlled trial. *Musculoskeletal Care* 2018; 16(1):39-47.
- (159) Evans S, Moieni M, Lung K, Tsao J, Sternlieb B, Taylor M et al. Impact of iyengar yoga on quality of life in young women with rheumatoid arthritis. *Clin J Pain* 2013; 29(11):988-997.
- (160) Singh VK, Bhandari RB, Rana BB. Effect of yoga package on rheumatoid arthritis. *Indian J Physiol Pharmacol* 2011; 55(4):329-335.

- (161) Badsha H, Chhabra V, Leibman C, Mofti A, Kong KO. The benefits of yoga for rheumatoid arthritis: results of a preliminary, structured 8-week program. *Rheumatol Int* 2009; 29(12):1417-1421.
- (162) Bosch PR, Traustadottir T, Howard P, Matt KS. Functional and physiological effects of yoga in women with rheumatoid arthritis: a pilot study. *Altern Ther Health Med* 2009; 15(4):24-31.
- (163) O'Dwyer T, Durcan L, Wilson F. Exercise and physical activity in systemic lupus erythematosus: A systematic review with meta-analyses. *Semin Arthritis Rheum* 2017; 47(2):204-215.
- (164) Wu ML, Yu KH, Tsai JC. The Effectiveness of Exercise in Adults With Systemic Lupus Erythematosus: A Systematic Review and Meta-Analysis to Guide Evidence-Based Practice. *Worldviews Evid Based Nurs* 2017; 14(4):306-315.
- (165) Andrades C, Fuego C, Manrique-Arija S, Fernandez-Nebro A. Management of cardiovascular risk in systemic lupus erythematosus: a systematic review. *Lupus* 2017; 26(13):1407-1419.
- (166) del Pino-Sedeno T, Trujillo-Martin MM, Ruiz-Iratorza G, Cuellar-Pompa L, de Pascual-Medina AM, Serrano-Aguilar P. Effectiveness of Nonpharmacologic Interventions for Decreasing Fatigue in Adults With Systemic Lupus Erythematosus: A Systematic Review. *Arthritis Care Res (Hoboken )* 2016; 68(1):141-148.
- (167) Yuen HK, Cunningham MA. Optimal management of fatigue in patients with systemic lupus erythematosus: a systematic review. *Ther Clin Risk Manag* 2014; 10:775-786.
- (168) Abrahao MI, Gomiero AB, Peccin MS, Grande AJ, Trevisani VF. Cardiovascular training vs. resistance training for improving quality of life and physical function in patients with systemic lupus erythematosus: a randomized controlled trial. *Scand J Rheumatol* 2016; 45(3):197-201.
- (169) Bostrom C, Elfving B, Dupre B, Opava CH, Lundberg IE, Jansson E. Effects of a one-year physical activity programme for women with systemic lupus erythematosus - a randomized controlled study. *Lupus* 2016; 25(6):602-616.
- (170) Tench CM, McCarthy J, McCurdie I, White PD, D'Cruz DP. Fatigue in systemic lupus erythematosus: a randomized controlled trial of exercise. *Rheumatology (Oxford)* 2003; 42(9):1050-1054.
- (171) Robb-Nicholson LC, Daltroy L, Eaton H, Gall V, Wright E, Hartley LH et al. Effects of aerobic conditioning in lupus fatigue: a pilot study. *Br J Rheumatol* 1989; 28(6):500-505.
- (172) Soriano-Maldonado A, Morillas-de-Laguno P, Sabio JM, Gavilan-Carrera B, Rosales-Castillo A, Montalban-Mendez C et al. Effects of 12-week Aerobic Exercise on Arterial Stiffness, Inflammation, and Cardiorespiratory Fitness in Women with Systemic LUPUS Erythematosus: Non-Randomized Controlled Trial. *J Clin Med* 2018; 7(12).
- (173) dos Reis-Neto ET, da Silva AE, Monteiro CM, de Camargo LM, Sato EI. Supervised physical exercise improves endothelial function in patients with systemic lupus erythematosus. *Rheumatology (Oxford)* 2013; 52(12):2187-2195.

- (174) Carvalho MR, Sato EI, Tebexreni AS, Heidecher RT, Schenkman S, Neto TL. Effects of supervised cardiovascular training program on exercise tolerance, aerobic capacity, and quality of life in patients with systemic lupus erythematosus. *Arthritis Rheum* 2005; 53(6):838-844.
- (175) Bogdanovic G, Stojanovich L, Djokovic A, Stanisavljevic N. Physical Activity Program Is Helpful for Improving Quality of Life in Patients with Systemic Lupus Erythematosus. *Tohoku J Exp Med* 2015; 237(3):193-199.
- (176) Miossi R, Benatti FB, Luciade de Sa PA, Lima FR, Borba EF, Prado DM et al. Using exercise training to counterbalance chronotropic incompetence and delayed heart rate recovery in systemic lupus erythematosus: a randomized trial. *Arthritis Care Res (Hoboken)* 2012; 64(8):1159-1166.
- (177) Ramsey-Goldman R, Schilling EM, Dunlop D, Langman C, Greenland P, Thomas RJ et al. A pilot study on the effects of exercise in patients with systemic lupus erythematosus. *Arthritis Care Res* 2000; 13(5):262-269.
- (178) Timoteo RP, Silva AF, Micheli DC, Candido Murta EF, Freire M, Teodoro RB et al. Increased flexibility, pain reduction and unaltered levels of IL-10 and CD11b + lymphocytes in patients with systemic lupus erythematosus were associated with kinesiotherapy. *Lupus* 2018; 27(7):1159-1168.
- (179) Regel A, Sepriano A, Baraliakos X, van der Heijde D, Braun J, Landewe R et al. Efficacy and safety of non-pharmacological and non-biological pharmacological treatment: a systematic literature review informing the 2016 update of the ASAS/EULAR recommendations for the management of axial spondyloarthritis. *RMD Open* 2017; 3(1):e000397.
- (180) O'Dwyer T, O'Shea F, Wilson F. Exercise therapy for spondyloarthritis: a systematic review. *Rheumatol Int* 2014; 34(7):887-902.
- (181) Karahan AY, Tok F, Yildirim P, Ordahan B, Turkoglu G, Sahin N. The Effectiveness of Exergames in Patients with Ankylosing Spondylitis: A Randomized Controlled Trial. *Adv Clin Exp Med* 2016; 25(5):931-936.
- (182) Jennings F, Oliveira HA, de Souza MC, Cruz VG, Natour J. Effects of Aerobic Training in Patients with Ankylosing Spondylitis. *J Rheumatol* 2015; 42(12):2347-2353.
- (183) Niedermann K, Sidelnikov E, Muggli C, Dagfinrud H, Hermann M, Tamborrini G et al. Effect of cardiovascular training on fitness and perceived disease activity in people with ankylosing spondylitis. *Arthritis Care Res (Hoboken)* 2013; 65(11):1844-1852.
- (184) Ajeganova S, Wornert M, Hafstrom I. A four-week team-rehabilitation programme in a warm climate decreases disability and improves health and body function for up to one year: A prospective study in Swedish patients with inflammatory joint diseases. *J Rehabil Med* 2016; 48(8):711-718.
- (185) Sweeney S, Taylor G, Calin A. The effect of a home based exercise intervention package on outcome in ankylosing spondylitis: a randomized controlled trial. *J Rheumatol* 2002; 29(4):763-766.
- (186) Brophy S, Cooksey R, Davies H, Dennis MS, Zhou SM, Siebert S. The effect of physical activity and motivation on function in ankylosing spondylitis: a cohort study. *Semin Arthritis Rheum* 2013; 42(6):619-626.
- (187) Ward MM. Predictors of the progression of functional disability in patients with ankylosing spondylitis. *J Rheumatol* 2002; 29(7):1420-1425.

- (188) Uhrin Z, Kuzis S, Ward MM. Exercise and changes in health status in patients with ankylosing spondylitis. *Arch Intern Med* 2000; 160(19):2969-2975.
- (189) Pecourneau V, Degboe Y, Barnetche T, Cantagrel A, Constantin A, Ruysse-Witrand A. Effectiveness of Exercise Programs in Ankylosing Spondylitis: A Meta-Analysis of Randomized Controlled Trials. *Arch Phys Med Rehabil* 2018; 99(2):383-389.
- (190) Chang W, Tsou Y, Lee C. Comparison between specific exercises and physical therapy for managing patients with ankylosing spondylitis: A meta-analysis of randomized controlled trials. *International Journal of Clinical and Experimental Medicine* 2016; 9(9):17028-17039.
- (191) Millner JR, Barron JS, Beinke KM, Butterworth RH, Chasle BE, Dutton LJ et al. Exercise for ankylosing spondylitis: An evidence-based consensus statement. *Semin Arthritis Rheum* 2016; 45(4):411-427.
- (192) Liang H, Zhang H, Ji H, Wang C. Effects of home-based exercise intervention on health-related quality of life for patients with ankylosing spondylitis: a meta-analysis. *Clin Rheumatol* 2015; 34(10):1737-1744.
- (193) Liang H, Li WR, Zhang H, Tian X, Wei W, Wang CM. Concurrent Intervention With Exercises and Stabilized Tumor Necrosis Factor Inhibitor Therapy Reduced the Disease Activity in Patients With Ankylosing Spondylitis: A Meta-Analysis. *Medicine (Baltimore)* 2015; 94(50):e2254.
- (194) Martins NA, Furtado GE, Campos MJ, Leitao JC, Filaire E, Ferreira JP. Exercise and ankylosing spondylitis with New York modified criteria: a systematic review of controlled trials with meta-analysis. *Acta Reumatol Port* 2014; 39(4):298-308.
- (195) Sharan D, Rajkumar JS. Physiotherapy for Ankylosing Spondylitis: Systematic Review and a Proposed Rehabilitation Protocol. *Curr Rheumatol Rev* 2017; 13(2):121-125.
- (196) Sveaas SH, Bilberg A, Berg IJ, Provan SA, Rollefstad S, Semb AG et al. High intensity exercise for 3 months reduces disease activity in axial spondyloarthritis (axSpA): a multicentre randomised trial of 100 patients. *Br J Sports Med* 2019.
- (197) Sveaas SH, Berg IJ, Fongen C, Provan SA, Dagfinrud H. High-intensity cardiorespiratory and strength exercises reduced emotional distress and fatigue in patients with axial spondyloarthritis: a randomized controlled pilot study. *Scand J Rheumatol* 2018; 47(2):117-121.
- (198) Aydin T, Taspinar O, Sariyildiz MA, Guneser M, Keskin Y, Canbaz N et al. Evaluation of the effectiveness of home based or hospital based calisthenic exercises in patients with ankylosing spondylitis. *J Back Musculoskelet Rehabil* 2016; 29(4):723-730.
- (199) Rosu MO, Topa I, Chirieac R, Ancuta C. Effects of Pilates, McKenzie and Heckscher training on disease activity, spinal motility and pulmonary function in patients with ankylosing spondylitis: a randomized controlled trial. *Rheumatol Int* 2014; 34(3):367-372.
- (200) Sveaas SH, Berg IJ, Provan SA, Semb AG, Hagen KB, Vollestad N et al. Efficacy of high intensity exercise on disease activity and cardiovascular risk in active axial spondyloarthritis: a randomized controlled pilot study. *PLoS One* 2014; 9(9):e108688.
- (201) Kjekken I, Bo I, Ronningen A, Spada C, Mowinckel P, Hagen KB et al. A three-week multidisciplinary in-patient rehabilitation programme had positive long-term effects in patients with ankylosing spondylitis: randomized controlled trial. *J Rehabil Med* 2013; 45(3):260-267.



- (202) Analay Y, Ozcan E, Karan A, Diracoglu D, Aydin R. The effectiveness of intensive group exercise on patients with ankylosing spondylitis. *Clin Rehabil* 2003; 17(6):631-636.
- (203) Hidding A, van der Linden S, Gielen X, de WL, Dijkmans B, Moolenburgh D. Continuation of group physical therapy is necessary in ankylosing spondylitis: results of a randomized controlled trial. *Arthritis Care Res* 1994; 7(2):90-96.
- (204) Hidding A, van der Linden S, Boers M, Gielen X, de WL, Kester A et al. Is group physical therapy superior to individualized therapy in ankylosing spondylitis? A randomized controlled trial. *Arthritis Care Res* 1993; 6(3):117-125.
- (205) Kraag G, Stokes B, Groh J, Helewa A, Goldsmith C. The effects of comprehensive home physiotherapy and supervision on patients with ankylosing spondylitis--a randomized controlled trial. *J Rheumatol* 1990; 17(2):228-233.
- (206) Levitova A, Hulejova H, Spiritovic M, Pavelka K, Senolt L, Husakova M. Clinical improvement and reduction in serum calprotectin levels after an intensive exercise programme for patients with ankylosing spondylitis and non-radiographic axial spondyloarthritis. *Arthritis Res Ther* 2016; 18(1):275.
- (207) Aytekin E, Caglar NS, Ozgonenel L, Tutun S, Demiryontar DY, Demir SE. Home-based exercise therapy in patients with ankylosing spondylitis: effects on pain, mobility, disease activity, quality of life, and respiratory functions. *Clin Rheumatol* 2012; 31(1):91-97.
- (208) Viitanen JV, Heikkila S. Functional changes in patients with spondylarthropathy. A controlled trial of the effects of short-term rehabilitation and 3-year follow-up. *Rheumatol Int* 2001; 20(5):211-214.
- (209) Lubrano E, D'Angelo S, Parsons WJ, Corbi G, Ferrara N, Rengo F et al. Effectiveness of rehabilitation in active ankylosing spondylitis assessed by the ASAS response criteria. *Rheumatology (Oxford)* 2007; 46(11):1672-1675.
- (210) Band DA, Jones SD, Kennedy LG, Garrett SL, Porter J, Gay L et al. Which patients with ankylosing spondylitis derive most benefit from an inpatient management program? *J Rheumatol* 1997; 24(12):2381-2384.
- (211) Viitanen JV, Lehtinen K, Suni J, Kautiainen H. Fifteen months' follow-up of intensive inpatient physiotherapy and exercise in ankylosing spondylitis. *Clin Rheumatol* 1995; 14(4):413-419.
- (212) Kraag G, Stokes B, Groh J, Helewa A, Goldsmith CH. The effects of comprehensive home physiotherapy and supervision on patients with ankylosing spondylitis--an 8-month followup. *J Rheumatol* 1994; 21(2):261-263.
- (213) Viitanen JV, Suni J, Kautiainen H, Liimatainen M, Takala H. Effect of physiotherapy on spinal mobility in ankylosing spondylitis. *Scand J Rheumatol* 1992; 21(1):38-41.
- (214) Escalas C, Dalichampt M, Dougados M, Poiraudou S. Evaluation of physiotherapy in a prospective cohort of early axial spondyloarthritis. Data from the DESIR cohort. *Joint Bone Spine* 2016; 83(2):185-190.
- (215) Zao A, Cantista P. The role of land and aquatic exercise in ankylosing spondylitis: a systematic review. *Rheumatol Int* 2017; 37(12):1979-1990.

- (216) Dunder U, Solak O, Toktas H, Demirdal US, Subasi V, Kavuncu V et al. Effect of aquatic exercise on ankylosing spondylitis: a randomized controlled trial. *Rheumatol Int* 2014; 34(11):1505-1511.
- (217) Karapolat H, Eyigor S, Zoghi M, Akkoc Y, Kirazli Y, Keser G. Are swimming or aerobic exercise better than conventional exercise in ankylosing spondylitis patients? A randomized controlled study. *Eur J Phys Rehabil Med* 2009; 45(4):449-457.
- (218) Hsieh LF, Chuang CC, Tseng CS, Wei JC, Hsu WC, Lin YJ. Combined home exercise is more effective than range-of-motion home exercise in patients with ankylosing spondylitis: a randomized controlled trial. *Biomed Res Int* 2014; 2014:398190.
- (219) Rodriguez-Lozano C, Juanola X, Cruz-Martinez J, Pena-Arrebola A, Mulero J, Gratacos J et al. Outcome of an education and home-based exercise programme for patients with ankylosing spondylitis: a nationwide randomized study. *Clin Exp Rheumatol* 2013; 31(5):739-748.
- (220) Lim HJ, Moon YI, Lee MS. Effects of home-based daily exercise therapy on joint mobility, daily activity, pain, and depression in patients with ankylosing spondylitis. *Rheumatol Int* 2005; 25(3):225-229.
- (221) Yigit S, Sahin Z, Demir SE, Aytac DH. Home-based exercise therapy in ankylosing spondylitis: short-term prospective study in patients receiving tumor necrosis factor alpha inhibitors. *Rheumatol Int* 2013; 33(1):71-77.
- (222) Durmus D, Alayli G, Cil E, Canturk F. Effects of a home-based exercise program on quality of life, fatigue, and depression in patients with ankylosing spondylitis. *Rheumatol Int* 2009; 29(6):673-677.
- (223) Durmus D, Alayli G, Uzun O, Tander B, Canturk F, Bek Y et al. Effects of two exercise interventions on pulmonary functions in the patients with ankylosing spondylitis. *Joint Bone Spine* 2009; 76(2):150-155.
- (224) Karapolat H, Akkoc Y, Sari I, Eyigor S, Akar S, Kirazli Y et al. Comparison of group-based exercise versus home-based exercise in patients with ankylosing spondylitis: effects on Bath Ankylosing Spondylitis Indices, quality of life and depression. *Clin Rheumatol* 2008; 27(6):695-700.
- (225) de Souza MC, Jennings F, Morimoto H, Natour J. Swiss ball exercises improve muscle strength and walking performance in ankylosing spondylitis: a randomized controlled trial. *Rev Bras Reumatol Engl Ed* 2017; 57(1):45-55.
- (226) Kasapoglu Aksoy M., Birtane M, Tastekin N, Ekuklu G. The Effectiveness of Structured Group Education on Ankylosing Spondylitis Patients. *J Clin Rheumatol* 2017; 23(3):138-143.
- (227) Rosu OM, Ancuta C. McKenzie training in patients with early stages of ankylosing spondylitis: results of a 24-week controlled study. *Eur J Phys Rehabil Med* 2015; 51(3):261-268.
- (228) Masiero S, Poli P, Bonaldo L, Pigatto M, Ramonda R, Lubrano E et al. Supervised training and home-based rehabilitation in patients with stabilized ankylosing spondylitis on TNF inhibitor treatment: a controlled clinical trial with a 12-month follow-up. *Clin Rehabil* 2014; 28(6):562-572.

- (229) Masiero S, Bonaldo L, Pigatto M, Lo NA, Ramonda R, Punzi L. Rehabilitation treatment in patients with ankylosing spondylitis stabilized with tumor necrosis factor inhibitor therapy: a randomized controlled trial. *J Rheumatol* 2011; 38(7):1335-1342.
- (230) Altan L, Korkmaz N, Dizdar M, Yurtkuran M. Effect of Pilates training on people with ankylosing spondylitis. *Rheumatol Int* 2012; 32(7):2093-2099.
- (231) Fernandez-de-Las-Penas C, Alonso-Blanco C, Alguacil-Diego IM, Miangolarra-Page JC. One-year follow-up of two exercise interventions for the management of patients with ankylosing spondylitis: a randomized controlled trial. *Am J Phys Med Rehabil* 2006; 85(7):559-567.
- (232) Fernandez-de-Las-Penas C, Alonso-Blanco C, Morales-Cabezas M, Miangolarra-Page JC. Two exercise interventions for the management of patients with ankylosing spondylitis: a randomized controlled trial. *Am J Phys Med Rehabil* 2005; 84(6):407-419.
- (233) Gyurcsik ZN, Andras A, Bodnar N, Szekanecz Z, Szanto S. Improvement in pain intensity, spine stiffness, and mobility during a controlled individualized physiotherapy program in ankylosing spondylitis. *Rheumatol Int* 2012; 32(12):3931-3936.
- (234) Hulejova H, Levitova A, Kuklova M, Stochl J, Haluzik M, Pavelka K et al. No effect of physiotherapy on the serum levels of adipocytokines in patients with ankylosing spondylitis. *Clin Rheumatol* 2012; 31(1):67-71.
- (235) Ortancil O, Sarikaya S, Sapmaz P, Basaran A, Ozdolap S. The effect(s) of a six-week home-based exercise program on the respiratory muscle and functional status in ankylosing spondylitis. *J Clin Rheumatol* 2009; 15(2):68-70.
- (236) Roger-Silva D, Natour J, Moreira E, Jennings F. A resistance exercise program improves functional capacity of patients with psoriatic arthritis: a randomized controlled trial. *Clin Rheumatol* 2018; 37(2):389-395.
- (237) Chimenti MS, Triggianese P, Conigliaro P, Santoro M, Lucchetti R, Perricone R. Self-reported adherence to a home-based exercise program among patients affected by psoriatic arthritis with minimal disease activity. *Drug Dev Res* 2014; 75 Suppl 1:S57-S59.
- (238) Antonioli CM, Bua G, Frige A, Prandini K, Radici S, Scarsi M et al. An individualized rehabilitation program in patients with systemic sclerosis may improve quality of life and hand mobility. *Clin Rheumatol* 2009; 28(2):159-165.
- (239) Moran ME. Scleroderma and evidence based non-pharmaceutical treatment modalities for digital ulcers: a systematic review. *J Wound Care* 2014; 23(10):510-516.
- (240) Rannou F, Boutron I, Mouthon L, Sanchez K, Tiffreau V, Hachulla E et al. Personalized Physical Therapy Versus Usual Care for Patients With Systemic Sclerosis: A Randomized Controlled Trial. *Arthritis Care Res (Hoboken)* 2017; 69(7):1050-1059.
- (241) Schouffoer AA, Ninaber MK, Beart-van de Voorde LJ, van der Giesen FJ, de JZ, Stolk J et al. Randomized comparison of a multidisciplinary team care program with usual care in patients with systemic sclerosis. *Arthritis Care Res (Hoboken)* 2011; 63(6):909-917.
- (242) Pinto AL, Oliveira NC, Gualano B, Christmann RB, Painelli VS, Artioli GG et al. Efficacy and safety of concurrent training in systemic sclerosis. *J Strength Cond Res* 2011; 25(5):1423-1428.

- (243) Maddali Bongi S, Del Rosso A, alluccio F, ai G, igismondi F, assalacqua M et al. Efficacy of a tailored rehabilitation program for systemic sclerosis. *Clin Exp Rheumatol* 2009; 27(3 Suppl 54):44-50.
- (244) Stefanantoni K, Sciarra I, Iannace N, Vasile M, Caucci M, Sili SA et al. Occupational therapy integrated with a self-administered stretching program on systemic sclerosis patients with hand involvement. *Clin Exp Rheumatol* 2016; 34 Suppl 100(5):157-161.
- (245) Horvath J, Balint Z, Szep E, Deiszinger A, Minier T, Farkas N et al. Efficacy of intensive hand physical therapy in patients with systemic sclerosis. *Clin Exp Rheumatol* 2017; 35 Suppl 106(4):159-166.
- (246) Mugii N, Matsushita T, Oohata S, Okita H, Yahata T, Someya F et al. Long-term follow-up of finger passive range of motion in Japanese systemic sclerosis patients treated with self-administered stretching. *Mod Rheumatol* 2019; 29(3):484-490.
- (247) Landim SF, Bertolo MB, Marcatto de Abreu MF, Del Rio AP, Mazon CC, Marques-Neto JF et al. The evaluation of a home-based program for hands in patients with systemic sclerosis. *J Hand Ther* 2017.
- (248) Mugii N, Hasegawa M, Matsushita T, Kondo M, Orito H, Yanaba K et al. The efficacy of self-administered stretching for finger joint motion in Japanese patients with systemic sclerosis. *J Rheumatol* 2006; 33(8):1586-1592.
- (249) Ma L, Sun R, Jia Z, Zou Y, Xin Y, Cheng X et al. Clinical characteristics associated with subcutaneous tophi formation in Chinese gout patients: a retrospective study. *Clin Rheumatol* 2018; 37(5):1359-1365.
- (250) Adithya Acharya K, Sharma A. Evaluation of the efficacy of siravyadha and guduchi siddha yoga basti in the management of vatarakta with special reference to gout. *International Journal of Reserach in Ayuveda and Pharmacy* 2019; 4(3):402-409.
- (251) Sadeghi A, Rad ZA, Sajedi B, Heydari AH, Akbarieh S, Jafari B. Effect of weight losing on the clinical status improvement of patients with knee osteoarthritis. *Reumatol Clin* 2019; 15(2):73-76.
- (252) O'Brien KM, Wiggers J, Williams A, Campbell E, Hodder RK, Wolfenden L et al. Telephone-based weight loss support for patients with knee osteoarthritis: a pragmatic randomised controlled trial. *Osteoarthritis Cartilage* 2018; 26(4):485-494.
- (253) Allen KD, Oddone EZ, Coffman CJ, Jeffreys AS, Bosworth HB, Chatterjee R et al. Patient, Provider, and Combined Interventions for Managing Osteoarthritis in Primary Care: A Cluster Randomized Trial. *Ann Intern Med* 2017; 166(6):401-411.
- (254) Allen KD, Yancy WS, Jr., Bosworth HB, Coffman CJ, Jeffreys AS, Datta SK et al. A Combined Patient and Provider Intervention for Management of Osteoarthritis in Veterans: A Randomized Clinical Trial. *Ann Intern Med* 2016; 164(2):73-83.
- (255) Christensen R, Henriksen M, Leeds AR, Gudbergesen H, Christensen P, Sorensen TJ et al. Effect of weight maintenance on symptoms of knee osteoarthritis in obese patients: a twelve-month randomized controlled trial. *Arthritis Care Res (Hoboken )* 2015; 67(5):640-650.

- (256) Hunter DJ, Beavers DP, Eckstein F, Guermazi A, Loeser RF, Nicklas BJ et al. The Intensive Diet and Exercise for Arthritis (IDEA) trial: 18-month radiographic and MRI outcomes. *Osteoarthritis Cartilage* 2015; 23(7):1090-1098.
- (257) Saraboon Y, Aree-Ue S, Maruo SJ. The Effect of Multifactorial Intervention Programs on Health Behavior and Symptom Control Among Community-Dwelling Overweight Older Adults With Knee Osteoarthritis. *Orthop Nurs* 2015; 34(5):296-308.
- (258) Beavers DP, Beavers KM, Loeser RF, Walton NR, Lyles MF, Nicklas BJ et al. The independent and combined effects of intensive weight loss and exercise training on bone mineral density in overweight and obese older adults with osteoarthritis. *Osteoarthritis Cartilage* 2014; 22(6):726-733.
- (259) Henriksen M, Christensen R, Hunter DJ, Gudbergesen H, Boesen M, Lohmander LS et al. Structural changes in the knee during weight loss maintenance after a significant weight loss in obese patients with osteoarthritis: a report of secondary outcome analyses from a randomized controlled trial. *Osteoarthritis Cartilage* 2014; 22(5):639-646.
- (260) Somers TJ, Blumenthal JA, Guilak F, Kraus VB, Schmitt DO, Babyak MA et al. Pain coping skills training and lifestyle behavioral weight management in patients with knee osteoarthritis: a randomized controlled study. *Pain* 2012; 153(6):1199-1209.
- (261) Bliddal H, Leeds AR, Stigsgaard L, Astrup A, Christensen R. Weight loss as treatment for knee osteoarthritis symptoms in obese patients: 1-year results from a randomised controlled trial. *Ann Rheum Dis* 2011; 70(10):1798-1803.
- (262) Christensen R, Astrup A, Bliddal H. Weight loss: the treatment of choice for knee osteoarthritis? A randomized trial. *Osteoarthritis Cartilage* 2005; 13(1):20-27.
- (263) Gudbergesen H, Boesen M, Christensen R, Astrup A, Bliddal H. Radiographs and low field MRI (0.2T) as predictors of efficacy in a weight loss trial in obese women with knee osteoarthritis. *BMC Musculoskelet Disord* 2011; 12:56.
- (264) Riecke BF, Christensen R, Christensen P, Leeds AR, Boesen M, Lohmander LS et al. Comparing two low-energy diets for the treatment of knee osteoarthritis symptoms in obese patients: a pragmatic randomized clinical trial. *Osteoarthritis Cartilage* 2010; 18(6):746-754.
- (265) Ravaud P, Flipo RM, Boutron I, Roy C, Mahmoudi A, Giraudeau B et al. ARTIST (osteoarthritis intervention standardized) study of standardised consultation versus usual care for patients with osteoarthritis of the knee in primary care in France: pragmatic randomised controlled trial. *BMJ* 2009; 338:b421.
- (266) Miller GD, Nicklas BJ, Loeser RF. Inflammatory biomarkers and physical function in older, obese adults with knee pain and self-reported osteoarthritis after intensive weight-loss therapy. *J Am Geriatr Soc* 2008; 56(4):644-651.
- (267) Miller GD, Nicklas BJ, Davis C, Loeser RF, Lenchik L, Messier SP. Intensive weight loss program improves physical function in older obese adults with knee osteoarthritis. *Obesity (Silver Spring)* 2006; 14(7):1219-1230.
- (268) Rejeski WJ, Focht BC, Messier SP, Morgan T, Pahor M, Penninx B. Obese, older adults with knee osteoarthritis: weight loss, exercise, and quality of life. *Health Psychol* 2002; 21(5):419-426.

- (269) Messier SP, Loeser RF, Mitchell MN, Valle G, Morgan TP, Rejeski WJ et al. Exercise and weight loss in obese older adults with knee osteoarthritis: a preliminary study. *J Am Geriatr Soc* 2000; 48(9):1062-1072.
- (270) Toda Y. The effect of energy restriction, walking, and exercise on lower extremity lean body mass in obese women with osteoarthritis of the knee. *J Orthop Sci* 2001; 6(2):148-154.
- (271) Huang MH, Chen CH, Chen TW, Weng MC, Wang WT, Wang YL. The effects of weight reduction on the rehabilitation of patients with knee osteoarthritis and obesity. *Arthritis Care Res* 2000; 13(6):398-405.
- (272) Bartholdy C, Christensen R, Kristensen LE, Gudbergson H, Bliddal H, Overgaard A et al. Association between weight loss and spontaneous changes in physical inactivity in overweight/obese individuals with knee osteoarthritis: an 8-week prospective cohort study. *Arthritis Care Res (Hoboken )* 2019.
- (273) Aree-Ue S, Saraboon Y, Belza B. Long-Term Adherence and Effectiveness of a Multicomponent Intervention for Community-Dwelling Overweight Thai Older Adults with Knee Osteoarthritis: 1-Year Follow Up. *J Gerontol Nurs* 2017; 43(4):40-48.
- (274) Atukorala I, Makovey J, Lawler L, Messier SP, Bennell K, Hunter DJ. Is There a Dose-Response Relationship Between Weight Loss and Symptom Improvement in Persons With Knee Osteoarthritis? *Arthritis Care Res (Hoboken )* 2016; 68(8):1106-1114.
- (275) Bartels EM, Christensen R, Christensen P, Henriksen M, Bennett A, Gudbergson H et al. Effect of a 16 weeks weight loss program on osteoarthritis biomarkers in obese patients with knee osteoarthritis: a prospective cohort study. *Osteoarthritis Cartilage* 2014; 22(11):1817-1825.
- (276) Paans N, van dA-S, I, Dilling RG, Bos M, van der Meer K, Bulstra SK et al. Effect of exercise and weight loss in people who have hip osteoarthritis and are overweight or obese: a prospective cohort study. *Phys Ther* 2013; 93(2):137-146.
- (277) Gudbergson H, Boesen M, Lohmander LS, Christensen R, Henriksen M, Bartels EM et al. Weight loss is effective for symptomatic relief in obese subjects with knee osteoarthritis independently of joint damage severity assessed by high-field MRI and radiography. *Osteoarthritis Cartilage* 2012; 20(6):495-502.
- (278) Bihlet AR, Byrjalsen I, Bay-Jensen AC, Andersen JR, Christiansen C, Riis BJ et al. Identification of pain categories associated with change in pain in patients receiving placebo: data from two phase 3 randomized clinical trials in symptomatic knee osteoarthritis. *BMC Musculoskelet Disord* 2018; 19(1):17.
- (279) Han A, Gellhorn AC. Trajectories of Quality of Life and Associated Risk Factors in Patients With Knee Osteoarthritis: Findings From the Osteoarthritis Initiative. *Am J Phys Med Rehabil* 2018; 97(9):620-627.
- (280) Jacobs CA, Vranceanu AM, Thompson KL, Lattermann C. Rapid Progression of Knee Pain and Osteoarthritis Biomarkers Greatest for Patients with Combined Obesity and Depression: Data from the Osteoarthritis Initiative. *Cartilage* 2018;1947603518777577.
- (281) Pelletier JP, Raynauld JP, Abram F, Dorais M, Delorme P, Martel-Pelletier J. Exploring determinants predicting response to intra-articular hyaluronic acid treatment in symptomatic knee osteoarthritis: 9-year follow-up data from the Osteoarthritis Initiative. *Arthritis Res Ther* 2018; 20(1):40.

- (282) Eymard F, Chevalier X, Conrozier T. Obesity and radiological severity are associated with viscosupplementation failure in patients with knee osteoarthritis. *J Orthop Res* 2017; 35(10):2269-2274.
- (283) Moyer R, Wirth W, Eckstein F. Longitudinal Changes in Magnetic Resonance Imaging-Based Measures of Femorotibial Cartilage Thickness as a Function of Alignment and Obesity: Data From the Osteoarthritis Initiative. *Arthritis Care Res (Hoboken)* 2017; 69(7):959-965.
- (284) Bastick AN, Verkleij SP, Damen J, Wesseling J, Hilberdink WK, Bindels PJ et al. Defining hip pain trajectories in early symptomatic hip osteoarthritis--5 year results from a nationwide prospective cohort study (CHECK). *Osteoarthritis Cartilage* 2016; 24(5):768-775.
- (285) de Rezende MU, Hissadomi MI, de Campos GC, Frucchi R, Pailo AF, Pasqualin T et al. One-Year Results of an Educational Program on Osteoarthritis: A Prospective Randomized Controlled Trial in Brazil. *Geriatr Orthop Surg Rehabil* 2016; 7(2):86-94.
- (286) Beavers KM, Beavers DP, Newman JJ, Anderson AM, Loeser RF, Jr., Nicklas BJ et al. Effects of total and regional fat loss on plasma CRP and IL-6 in overweight and obese, older adults with knee osteoarthritis. *Osteoarthritis Cartilage* 2015; 23(2):249-256.
- (287) Chatterjee D, McGee A, Strauss E, Youm T, Jazrawi L. Subchondral Calcium Phosphate is Ineffective for Bone Marrow Edema Lesions in Adults With Advanced Osteoarthritis. *Clin Orthop Relat Res* 2015; 473(7):2334-2342.
- (288) Karsdal MA, Bihlet A, Byrjalsen I, Alexandersen P, Ladel C, Michaels M et al. OA phenotypes, rather than disease stage, drive structural progression--identification of structural progressors from 2 phase III randomized clinical studies with symptomatic knee OA. *Osteoarthritis Cartilage* 2015; 23(4):550-558.
- (289) Kobayashi N, Inaba Y, Yukizawa Y, Ike H, Kubota S, Inoue T et al. Use of 18F-fluoride positron emission tomography as a predictor of the hip osteoarthritis progression. *Mod Rheumatol* 2015; 25(6):925-930.
- (290) Magnusson K, Slatkowsky-Christensen B, van der Heijde D, Kvien TK, Hagen KB, Haugen IK. Body mass index and progressive hand osteoarthritis: data from the Oslo hand osteoarthritis cohort. *Scand J Rheumatol* 2015; 44(4):331-336.
- (291) Gudbergesen H, Boesen M, Christensen R, Bartels EM, Henriksen M, Danneskiold-Samsøe B et al. Changes in bone marrow lesions in response to weight-loss in obese knee osteoarthritis patients: a prospective cohort study. *BMC Musculoskelet Disord* 2013; 14:106.
- (292) Perrot S, Bertin P. "Feeling better" or "feeling well" in usual care of hip and knee osteoarthritis pain: determination of cutoff points for patient acceptable symptom state (PASS) and minimal clinically important improvement (MCII) at rest and on movement in a national multicenter cohort study of 2414 patients with painful osteoarthritis. *Pain* 2013; 154(2):248-256.
- (293) Coffman C, Allen K, Woolson R. Mixed-effects regression modeling of real-time momentary pain assessments in osteoarthritis (OA) patients. *Health Service and Outcomes Research Methodology* 2012; 12(2-3):200-218.
- (294) Miyazaki T, Uchida K, Sato M, Watanabe S, Yoshida A, Wada M et al. Knee laxity after staircase exercise predicts radiographic disease progression in medial compartment knee osteoarthritis. *Arthritis Rheum* 2012; 64(12):3908-3916.

- (295) Rabago D, Zgierska A, Fortney L, Kijowski R, Mundt M, Ryan M et al. Hypertonic dextrose injections (prolotherapy) for knee osteoarthritis: results of a single-arm uncontrolled study with 1-year follow-up. *J Altern Complement Med* 2012; 18(4):408-414.
- (296) Sands GH, Brown PB, Essex MN. The Efficacy of Continuous Versus Intermittent Celecoxib Treatment in Osteoarthritis Patients with Body Mass Index  $\geq 30$  and  $< 30$  kg/m<sup>2</sup>. *Open Rheumatol J* 2013; 7:32-37.
- (297) Bartlett SJ, Ling SM, Mayo NE, Scott SC, Bingham CO, III. Identifying common trajectories of joint space narrowing over two years in knee osteoarthritis. *Arthritis Care Res (Hoboken )* 2011; 63(12):1722-1728.
- (298) Bingham CO, III, Smugar SS, Wang H, Peloso PM, Gammaitoni A. Predictors of response to cyclo-oxygenase-2 inhibitors in osteoarthritis: pooled results from two identical trials comparing etoricoxib, celecoxib, and placebo. *Pain Med* 2011; 12(3):352-361.
- (299) Nishimura A, Hasegawa M, Kato K, Yamada T, Uchida A, Sudo A. Risk factors for the incidence and progression of radiographic osteoarthritis of the knee among Japanese. *Int Orthop* 2011; 35(6):839-843.
- (300) Richette P, Poitou C, Garnero P, Vicaut E, Bouillot JL, Lacorte JM et al. Benefits of massive weight loss on symptoms, systemic inflammation and cartilage turnover in obese patients with knee osteoarthritis. *Ann Rheum Dis* 2011; 70(1):139-144.
- (301) Woollard JD, Gil AB, Sparto P, Kwok CK, Piva SR, Farrokhi S et al. Change in knee cartilage volume in individuals completing a therapeutic exercise program for knee osteoarthritis. *J Orthop Sports Phys Ther* 2011; 41(10):708-722.
- (302) Yusuf E, Bijsterbosch J, Slagboom PE, Rosendaal FR, Huizinga TW, Kloppenburg M. Body mass index and alignment and their interaction as risk factors for progression of knees with radiographic signs of osteoarthritis. *Osteoarthritis Cartilage* 2011; 19(9):1117-1122.
- (303) Shea MK, Houston DK, Nicklas BJ, Messier SP, Davis CC, Miller ME et al. The effect of randomization to weight loss on total mortality in older overweight and obese adults: the ADAPT Study. *J Gerontol A Biol Sci Med Sci* 2010; 65(5):519-525.
- (304) Eckstein F, Maschek S, Wirth W, Hudelmaier M, Hitzl W, Wyman B et al. One year change of knee cartilage morphology in the first release of participants from the Osteoarthritis Initiative progression subcohort: association with sex, body mass index, symptoms and radiographic osteoarthritis status. *Ann Rheum Dis* 2009; 68(5):674-679.
- (305) Le Graverand MP, Brandt K, Mazza SA, Raunig D, Vignon E. Progressive increase in body mass index is not associated with a progressive increase in joint space narrowing in obese women with osteoarthritis of the knee. *Ann Rheum Dis* 2009; 68(11):1734-1738.
- (306) Botha-Scheepers S, Dougados M, Ravaud P, Hellio Le Graverand MP, Watt I, Breedveld FC et al. Effect of medial tibial plateau alignment on serial radiographs on the capacity to predict progression of knee osteoarthritis. *Osteoarthritis Cartilage* 2008; 16(2):272-276.
- (307) Davies-Tuck ML, Wluka AE, Wang Y, Teichtahl AJ, Jones G, Ding C et al. The natural history of cartilage defects in people with knee osteoarthritis. *Osteoarthritis Cartilage* 2008; 16(3):337-342.



- (308) Pelletier JP, Raynauld JP, Berthiaume MJ, Abram F, Choquette D, Haraoui B et al. Risk factors associated with the loss of cartilage volume on weight-bearing areas in knee osteoarthritis patients assessed by quantitative magnetic resonance imaging: a longitudinal study. *Arthritis Res Ther* 2007; 9(4):R74.
- (309) Reijman M, Pols HA, Bergink AP, Hazes JM, Belo JN, Lievense AM et al. Body mass index associated with onset and progression of osteoarthritis of the knee but not of the hip: the Rotterdam Study. *Ann Rheum Dis* 2007; 66(2):158-162.
- (310) Raynauld JP, Martel-Pelletier J, Berthiaume MJ, Beaudoin G, Choquette D, Haraoui B et al. Long term evaluation of disease progression through the quantitative magnetic resonance imaging of symptomatic knee osteoarthritis patients: correlation with clinical symptoms and radiographic changes. *Arthritis Res Ther* 2006; 8(1):R21.
- (311) Wluka AE, Forbes A, Wang Y, Hanna F, Jones G, Cicuttini FM. Knee cartilage loss in symptomatic knee osteoarthritis over 4.5 years. *Arthritis Res Ther* 2006; 8(4):R90.
- (312) Sharma L, Cahue S, Song J, Hayes K, Pai YC, Dunlop D. Physical functioning over three years in knee osteoarthritis: role of psychosocial, local mechanical, and neuromuscular factors. *Arthritis Rheum* 2003; 48(12):3359-3370.
- (313) Cicuttini F, Wluka A, Wang Y, Stuckey S. The determinants of change in patella cartilage volume in osteoarthritic knees. *J Rheumatol* 2002; 29(12):2615-2619.
- (314) Wolfe F, Lane NE. The longterm outcome of osteoarthritis: rates and predictors of joint space narrowing in symptomatic patients with knee osteoarthritis. *J Rheumatol* 2002; 29(1):139-146.
- (315) Detora LM, Krupa D, Bolognese J, Sperling RS, Ehrich EW. Rofecoxib shows consistent efficacy in osteoarthritis clinical trials, regardless of specific patient demographic and disease factors. *J Rheumatol* 2001; 28(11):2494-2503.
- (316) Cooper C, Snow S, McAlindon TE, Kellingray S, Stuart B, Coggon D et al. Risk factors for the incidence and progression of radiographic knee osteoarthritis. *Arthritis Rheum* 2000; 43(5):995-1000.
- (317) Harris PA, Hart DJ, Dacre JE, Huskisson EC, Spector TD. The progression of radiological hand osteoarthritis over ten years: a clinical follow-up study. *Osteoarthritis Cartilage* 1994; 2(4):247-252.
- (318) Ledingham J, Dawson S, Preston B, Milligan G, Doherty M. Radiographic progression of hospital referred osteoarthritis of the hip. *Ann Rheum Dis* 1993; 52(4):263-267.
- (319) Schouten JS, van den Ouweland FA, Valkenburg HA. A 12 year follow up study in the general population on prognostic factors of cartilage loss in osteoarthritis of the knee. *Ann Rheum Dis* 1992; 51(8):932-937.
- (320) Berkhout B, Macfarlane JD, Cats A. Symptomatic osteoarthrosis of the knee: a follow-up study. *Br J Rheumatol* 1985; 24(1):40-45.
- (321) Ahn JH, Kang HW, Yang TY, Lee JY. Risk Factors for Radiographic Progression of Osteoarthritis After Meniscus Allograft Transplantation. *Arthroscopy* 2016; 32(12):2539-2546.

- (322) Liu Y, Hazlewood GS, Kaplan GG, Eksteen B, Barnabe C. Impact of Obesity on Remission and Disease Activity in Rheumatoid Arthritis: A Systematic Review and Meta-Analysis. *Arthritis Care Res (Hoboken )* 2017; 69(2):157-165.
- (323) Lupoli R, Pizzicato P, Scalera A, Ambrosino P, Amato M, Peluso R et al. Impact of body weight on the achievement of minimal disease activity in patients with rheumatic diseases: a systematic review and meta-analysis. *Arthritis Res Ther* 2016; 18(1):297.
- (324) Baghdadi LR, Woodman RJ, Shanahan EM, Mangoni AA. The impact of traditional cardiovascular risk factors on cardiovascular outcomes in patients with rheumatoid arthritis: a systematic review and meta-analysis. *PLoS One* 2015; 10(2):e0117952.
- (325) Baker JF, Stokes A, Mikuls TR, George M, England BR, Sayles H et al. Current and early life weight and associations with mortality in rheumatoid arthritis. *Clin Exp Rheumatol* 2019.
- (326) Hirose W, Harigai M, Uchiyama T, Itoh K, Ishizuka T, Matsumoto M et al. Low body mass index and lymphocytopenia associate with Mycobacterium avium complex pulmonary disease in patients with rheumatoid arthritis. *Mod Rheumatol* 2019; 29(1):105-112.
- (327) Lechtenboehmer CA, Jaeger VK, Kyburz D, Walker UA, Hugel T. Brief Report: Influence of Disease Activity in Rheumatoid Arthritis on Radiographic Progression of Concomitant Interphalangeal Joint Osteoarthritis. *Arthritis Rheumatol* 2019; 71(1):43-49.
- (328) England BR, Baker JF, Sayles H, Michaud K, Caplan L, Davis LA et al. Body Mass Index, Weight Loss, and Cause-Specific Mortality in Rheumatoid Arthritis. *Arthritis Care Res (Hoboken )* 2018; 70(1):11-18.
- (329) Nikiphorou E, Norton S, Young A, Dixey J, Walsh D, Helliwell H et al. The association of obesity with disease activity, functional ability and quality of life in early rheumatoid arthritis: data from the Early Rheumatoid Arthritis Study/Early Rheumatoid Arthritis Network UK prospective cohorts. *Rheumatology (Oxford)* 2018.
- (330) Rydell E, Forslind K, Nilsson JA, Jacobsson LTH, Turesson C. Smoking, body mass index, disease activity, and the risk of rapid radiographic progression in patients with early rheumatoid arthritis. *Arthritis Res Ther* 2018; 20(1):82.
- (331) Schulman E, Bartlett SJ, Schieir O, Andersen KM, Boire G, Pope JE et al. Overweight, Obesity, and the Likelihood of Achieving Sustained Remission in Early Rheumatoid Arthritis: Results From a Multicenter Prospective Cohort Study. *Arthritis Care Res (Hoboken )* 2018; 70(8):1185-1191.
- (332) Smolen JS, Szumski A, Koenig AS, Jones TV, Marshall L. Predictors of remission with etanercept-methotrexate induction therapy and loss of remission with etanercept maintenance, reduction, or withdrawal in moderately active rheumatoid arthritis: results of the PRESERVE trial. *Arthritis Res Ther* 2018; 20(1):8.
- (333) Sparks JA, Chang SC, Nguyen US, Barbhuiya M, Tedeschi SK, Lu B et al. Weight Change During the Early Rheumatoid Arthritis Period and Risk of Subsequent Mortality in Women With Rheumatoid Arthritis and Matched Comparators. *Arthritis Rheumatol* 2018; 70(1):18-29.
- (334) van der Heijde D, Durez P, Schett G, Naredo E, Ostergaard M, Meszaros G et al. Structural damage progression in patients with early rheumatoid arthritis treated with methotrexate, baricitinib, or baricitinib plus methotrexate based on clinical response in the phase 3 RA-BEGIN study. *Clin Rheumatol* 2018; 37(9):2381-2390.

- (335) Bird P, Nicholls D, Barrett R, de JJ, Griffiths H, Roberts L et al. Longitudinal study of clinical prognostic factors in patients with early rheumatoid arthritis: the PREDICT study. *Int J Rheum Dis* 2017; 20(4):460-468.
- (336) D'Agostino MA, Alten R, Mysler E, Le BM, Ye J, Murthy B et al. Body mass index and clinical response to intravenous or subcutaneous abatacept in patients with rheumatoid arthritis. *Clin Rheumatol* 2017; 36(12):2655-2665.
- (337) George MD, Ostergaard M, Conaghan PG, Emery P, Baker DG, Baker JF. Obesity and rates of clinical remission and low MRI inflammation in rheumatoid arthritis. *Ann Rheum Dis* 2017; 76(10):1743-1746.
- (338) Iannone F, Courvoisier DS, Gottenberg JE, Hernandez MV, Lie E, Canhao H et al. Body mass does not impact the clinical response to intravenous abatacept in patients with rheumatoid arthritis. Analysis from the "pan-European registry collaboration for abatacept (PANABA)". *Clin Rheumatol* 2017; 36(4):773-779.
- (339) Joo YB, Bang SY, Ryu JA, Lee S, Lee HS, Bae SC. Predictors of severe radiographic progression in patients with early rheumatoid arthritis: A Prospective observational cohort study. *Int J Rheum Dis* 2017; 20(10):1437-1446.
- (340) Levitsky A, Brismar K, Hafstrom I, Hambardzumyan K, Lourdudoss C, van Vollenhoven RF et al. Obesity is a strong predictor of worse clinical outcomes and treatment responses in early rheumatoid arthritis: results from the SWEFOT trial. *RMD Open* 2017; 3(2):e000458.
- (341) Mariette X, Alten R, Nusslein HG, Galeazzi M, Lorenz HM, Cantagrel A et al. The effect of body mass index on clinical response to abatacept as a first-line biologic for rheumatoid arthritis: 6-month results from the 2-year, observational, prospective ACTION study. *Joint Bone Spine* 2017; 84(5):571-576.
- (342) Miwa Y, Saito M, Furuya H, Yanai R, Ikari Y, Hayashi T et al. Clinical Characteristics of Rheumatoid Arthritis Patients Achieving Functional Remission after Six Months of Non-tumor Necrosis Factor Biological Disease-Modifying Antirheumatic Drugs (DMARDs) Treatment. *Intern Med* 2017; 56(17):2271-2275.
- (343) Ramirez J, Narvaez JA, Ruiz-Esquide V, Hernandez-Ganan J, Cuervo A, Inciarte-Mundo J et al. Clinical and sonographic biomarkers of structural damage progression in RA patients in clinical remission: A prospective study with 12 months follow-up. *Semin Arthritis Rheum* 2017; 47(3):303-309.
- (344) Feldthusen C, Grimby-Ekman A, Forsblad-d'Elia H, Jacobsson L, Mannerkorpi K. Explanatory factors and predictors of fatigue in persons with rheumatoid arthritis: A longitudinal study. *J Rehabil Med* 2016; 48(5):469-476.
- (345) Gardette A, Ottaviani S, Sellam J, Berenbaum F, Liote F, Fautrel B et al. Body mass index and response to abatacept in rheumatoid arthritis. *Eur J Clin Invest* 2016; 46(12):1048-1052.
- (346) Gardette A, Ottaviani S, Sellam J, Berenbaum F, Liote F, Meyer A et al. Body mass index and response to tocilizumab in rheumatoid arthritis: a real life study. *Clin Rheumatol* 2016; 35(4):857-861.
- (347) McWilliams DF, Walsh DA. Factors predicting pain and early discontinuation of tumour necrosis factor-alpha-inhibitors in people with rheumatoid arthritis: results from the British society for rheumatology biologics register. *BMC Musculoskelet Disord* 2016; 17:337.

- (348) Tantayakom P, Koolvisoot A, Arromdee E, Chiowchanwisawakit P, Muangchan C, Katchamart W. Metabolic syndrome is associated with disease activity in patients with rheumatoid arthritis. *Joint Bone Spine* 2016; 83(5):563-567.
- (349) Baker JF, Billig E, Michaud K, Ibrahim S, Caplan L, Cannon GW et al. Weight Loss, the Obesity Paradox, and the Risk of Death in Rheumatoid Arthritis. *Arthritis Rheumatol* 2015; 67(7):1711-1717.
- (350) Iannone F, Fanizzi R, Notarnicola A, Scioscia C, Anelli MG, Lapadula G. Obesity reduces the drug survival of second line biological drugs following a first TNF-alpha inhibitor in rheumatoid arthritis patients. *Joint Bone Spine* 2015; 82(3):187-191.
- (351) Pers YM, Godfrin-Valnet M, Lambert J, Fortunet C, Constant E, Mura T et al. Response to tocilizumab in rheumatoid arthritis is not influenced by the body mass index of the patient. *J Rheumatol* 2015; 42(4):580-584.
- (352) Kim HW, Park JK, Yang JA, Yoon YI, Lee EY, Song YW et al. Comparison of tuberculosis incidence in ankylosing spondylitis and rheumatoid arthritis during tumor necrosis factor inhibitor treatment in an intermediate burden area. *Clin Rheumatol* 2014; 33(9):1307-1312.
- (353) Ochi K, Go Y, Furuya T, Ikari K, Taniguchi A, Yamanaka H et al. Risk factors associated with the occurrence of distal radius fractures in Japanese patients with rheumatoid arthritis: a prospective observational cohort study. *Clin Rheumatol* 2014; 33(4):477-483.
- (354) Sandberg ME, Bengtsson C, Kallberg H, Wesley A, Klareskog L, Alfredsson L et al. Overweight decreases the chance of achieving good response and low disease activity in early rheumatoid arthritis. *Ann Rheum Dis* 2014; 73(11):2029-2033.
- (355) Ajeganova S, Andersson ML, Hafstrom I. Association of obesity with worse disease severity in rheumatoid arthritis as well as with comorbidities: a long-term followup from disease onset. *Arthritis Care Res (Hoboken)* 2013; 65(1):78-87.
- (356) Gremese E, Carletto A, Padovan M, Atzeni F, Raffeiner B, Giardina AR et al. Obesity and reduction of the response rate to anti-tumor necrosis factor alpha in rheumatoid arthritis: an approach to a personalized medicine. *Arthritis Care Res (Hoboken)* 2013; 65(1):94-100.
- (357) Kanecki K, Tyszko P, Wislowska M, Lyczkowska-Piotrowska J. Preliminary report on a study of health-related quality of life in patients with rheumatoid arthritis. *Rheumatol Int* 2013; 33(2):429-434.
- (358) Dirven L, Huizinga TW, Allaart CF. Risk factors for reported influenza and influenza-like symptoms in patients with rheumatoid arthritis. *Scand J Rheumatol* 2012; 41(5):359-365.
- (359) Wevers-de BK, Visser K, Heimans L, Ronday HK, Molenaar E, Groenendaal JH et al. Remission induction therapy with methotrexate and prednisone in patients with early rheumatoid and undifferentiated arthritis (the IMPROVED study). *Ann Rheum Dis* 2012; 71(9):1472-1477.
- (360) Wolfe F, Michaud K. Effect of body mass index on mortality and clinical status in rheumatoid arthritis. *Arthritis Care Res (Hoboken)* 2012; 64(10):1471-1479.
- (361) de Rooy DP, van der Linden MP, Knevel R, Huizinga TW, van der Helm-van Mil AH. Predicting arthritis outcomes--what can be learned from the Leiden Early Arthritis Clinic? *Rheumatology (Oxford)* 2011; 50(1):93-100.

- (362) Klaasen R, Wijbrandts CA, Gerlag DM, Tak PP. Body mass index and clinical response to infliximab in rheumatoid arthritis. *Arthritis Rheum* 2011; 63(2):359-364.
- (363) Liao KP, Weinblatt ME, Cui J, Iannaccone C, Chibnik LB, Lu B et al. Clinical predictors of erosion-free status in rheumatoid arthritis: a prospective cohort study. *Rheumatology (Oxford)* 2011; 50(8):1473-1479.
- (364) Tekaya R, Sahli H, Zribi S, Mahmoud I, Ben Hadj YC, Abdelmoula L et al. [Obesity has a protective effect on radiographic joint damage in rheumatoid arthritis]. *Tunis Med* 2011; 89(5):462-465.
- (365) Pye SR, Marshall T, Gaffney K, Silman AJ, Symmons DP, O'Neill TW. Influence of arthritis and non-arthritis related factors on areal bone mineral density (BMDa) in women with longstanding inflammatory polyarthritis: a primary care based inception cohort. *BMC Musculoskelet Disord* 2010; 11:106.
- (366) Verstappen SM, Bakker MF, Heurkens AH, van der Veen MJ, Kruize AA, Geurts MA et al. Adverse events and factors associated with toxicity in patients with early rheumatoid arthritis treated with methotrexate tight control therapy: the CAMERA study. *Ann Rheum Dis* 2010; 69(6):1044-1048.
- (367) Furuya T, Yamagiwa K, Ikai T, Inoue E, Taniguchi A, Momohara S et al. Associated factors for falls and fear of falling in Japanese patients with rheumatoid arthritis. *Clin Rheumatol* 2009; 28(11):1325-1330.
- (368) Hashimoto J, Garnero P, van der Heijde D, Miyasaka N, Yamamoto K, Kawai S et al. A combination of biochemical markers of cartilage and bone turnover, radiographic damage and body mass index to predict the progression of joint destruction in patients with rheumatoid arthritis treated with disease-modifying anti-rheumatic drugs. *Mod Rheumatol* 2009; 19(3):273-282.
- (369) van der Helm-van Mil AH, van der Kooij SM, Allaart CF, Toes RE, Huizinga TW. A high body mass index has a protective effect on the amount of joint destruction in small joints in early rheumatoid arthritis. *Ann Rheum Dis* 2008; 67(6):769-774.
- (370) Cohen JD, Dougados M, Goupille P, Cantagrel A, Meyer O, Sibilia J et al. Health assessment questionnaire score is the best predictor of 5-year quality of life in early rheumatoid arthritis. *J Rheumatol* 2006; 33(10):1936-1941.
- (371) Escalante A, Haas RW, del R, I. Paradoxical effect of body mass index on survival in rheumatoid arthritis: role of comorbidity and systemic inflammation. *Arch Intern Med* 2005; 165(14):1624-1629.
- (372) Maradit-Kremers H, Nicola PJ, Crowson CS, Ballman KV, Gabriel SE. Cardiovascular death in rheumatoid arthritis: a population-based study. *Arthritis Rheum* 2005; 52(3):722-732.
- (373) Skoldstam L, Brudin L, Hagfors L, Johansson G. Weight reduction is not a major reason for improvement in rheumatoid arthritis from lacto-vegetarian, vegan or Mediterranean diets. *Nutr J* 2005; 4:15.
- (374) Maradit-Kremers H, Nicola PJ, Crowson CS, Ballman KV, Gabriel SE. Prognostic importance of low body mass index in relation to cardiovascular mortality in rheumatoid arthritis. *Arthritis Rheum* 2004; 50(11):3450-3457.

- (375) Hoekstra M, van Ede AE, Haagsma CJ, van de Laar MA, Huizinga TW, Kruijssen MW et al. Factors associated with toxicity, final dose, and efficacy of methotrexate in patients with rheumatoid arthritis. *Ann Rheum Dis* 2003; 62(5):423-426.
- (376) Krishnan E, Lingala B, Bruce B, Fries JF. Disability in rheumatoid arthritis in the era of biological treatments. *Ann Rheum Dis* 2012; 71(2):213-218.
- (377) Kreps DJ, Halperin F, Desai SP, Zhang ZZ, Losina E, Olson AT et al. Association of weight loss with improved disease activity in patients with rheumatoid arthritis: A retrospective analysis using electronic medical record data. *Int J Clin Rheumatol* 2018; 13(1):1-10.
- (378) Mori S, Yoshitama T, Hidaka T, Sakai F, Hasegawa M, Hashiba Y et al. Comparative risk of hospitalized infection between biological agents in rheumatoid arthritis patients: A multicenter retrospective cohort study in Japan. *PLoS One* 2017; 12(6):e0179179.
- (379) Rashid N, Lin AT, Aranda G, Jr., Lin KJ, Guerrero VN, Nadkarni A et al. Rates, factors, reasons, and economic impact associated with switching in rheumatoid arthritis patients newly initiated on biologic disease modifying anti-rheumatic drugs in an integrated healthcare system. *J Med Econ* 2016; 19(6):568-575.
- (380) Ottaviani S, Gardette A, Roy C, Tubach F, Gill G, Palazzo E et al. Body Mass Index and response to rituximab in rheumatoid arthritis. *Joint Bone Spine* 2015; 82(6):432-436.
- (381) Ottaviani S, Gardette A, Tubach F, Roy C, Palazzo E, Gill G et al. Body mass index and response to infliximab in rheumatoid arthritis. *Clin Exp Rheumatol* 2015; 33(4):478-483.
- (382) Sparks JA, Halperin F, Karlson JC, Karlson EW, Bermas BL. Impact of Bariatric Surgery on Patients With Rheumatoid Arthritis. *Arthritis Care Res (Hoboken )* 2015; 67(12):1619-1626.
- (383) Gonzalez A, Maradit KH, Crowson CS, Ballman KV, Roger VL, Jacobsen SJ et al. Do cardiovascular risk factors confer the same risk for cardiovascular outcomes in rheumatoid arthritis patients as in non-rheumatoid arthritis patients? *Ann Rheum Dis* 2008; 67(1):64-69.
- (384) Kent PD, Luthra HS, Michet C, Jr. Risk factors for methotrexate-induced abnormal laboratory monitoring results in patients with rheumatoid arthritis. *J Rheumatol* 2004; 31(9):1727-1731.
- (385) Figueiredo-Braga M, Cornaby C, Bernardes M, Figueiredo M, Mesquita CDS, Costa L et al. Correlation between physical markers and psychiatric health in a Portuguese systemic lupus erythematosus cohort: The role of suffering in chronic autoimmune disease. *PLoS One* 2018; 13(4):e0195579.
- (386) Jacobs J, Korswagen LA, Schilder AM, van Tuyl LH, Dijkmans BA, Lems WF et al. Six-year follow-up study of bone mineral density in patients with systemic lupus erythematosus. *Osteoporos Int* 2013; 24(6):1827-1833.
- (387) Katz P, Yazdany J, Julian L, Trupin L, Margaretten M, Yelin E et al. Impact of obesity on functioning among women with systemic lupus erythematosus. *Arthritis Care Res (Hoboken )* 2011; 63(10):1357-1364.
- (388) Chaiamnuay S, Bertoli AM, Fernandez M, Apte M, Vila LM, Reveille JD et al. The impact of increased body mass index on systemic lupus erythematosus: data from LUMINA, a multiethnic cohort (LUMINA XLVI) [corrected]. *J Clin Rheumatol* 2007; 13(3):128-133.

- (389) Chaiamnuay S, Bertoli AM, Roseman JM, McGwin G, Apte M, Duran S et al. African-American and Hispanic ethnicities, renal involvement and obesity predispose to hypertension in systemic lupus erythematosus: results from LUMINA, a multiethnic cohort (LUMINAXLV). *Ann Rheum Dis* 2007; 66(5):618-622.
- (390) Uaratanawong S, Deesomchok U, Hiransuttikul N, Uaratanawong S. Four years follow-up of bone mineral density change in premenopausal women with systemic lupus erythematosus. *J Med Assoc Thai* 2004; 87(11):1374-1379.
- (391) Bruce IN, Gladman DD, Urowitz MB. Detection and modification of risk factors for coronary artery disease in patients with systemic lupus erythematosus: a quality improvement study. *Clin Exp Rheumatol* 1998; 16(4):435-440.
- (392) Petri M, Perez-Gutthann S, Spence D, Hochberg MC. Risk factors for coronary artery disease in patients with systemic lupus erythematosus. *Am J Med* 1992; 93(5):513-519.
- (393) Hernandez-Breijo B, Plasencia-Rodriguez C, Navarro-Compan V, Martinez-Feito A, Jochems A, Kneepkens EL et al. Association between concomitant csDMARDs and clinical response to TNF inhibitors in overweight patients with axial spondyloarthritis. *Arthritis Res Ther* 2019; 21(1):66.
- (394) Jeong H, Eun YH, Kim IY, Park EJ, Kim H, Lee J et al. Effect of tumor necrosis factor alpha inhibitors on spinal radiographic progression in patients with ankylosing spondylitis. *Int J Rheum Dis* 2018; 21(5):1098-1105.
- (395) Pedersen SJ, Weber U, Said-Nahal R, Sorensen IJ, Loft AG, Kollerup G et al. Structural progression rate decreases over time on serial radiography and magnetic resonance imaging of sacroiliac joints and spine in a five-year follow-up study of patients with ankylosing spondylitis treated with tumour necrosis factor inhibitor. *Scand J Rheumatol* 2018;1-13.
- (396) Maas F, Arends S, Wink FR, Bos R, Bootsma H, Brouwer E et al. Ankylosing spondylitis patients at risk of poor radiographic outcome show diminishing spinal radiographic progression during long-term treatment with TNF-alpha inhibitors. *PLoS One* 2017; 12(6):e0177231.
- (397) Maas F, Spoorenberg A, van der Slik BPG, van d, V, Brouwer E, Bootsma H et al. Clinical Risk Factors for the Presence and Development of Vertebral Fractures in Patients With Ankylosing Spondylitis. *Arthritis Care Res (Hoboken )* 2017; 69(5):694-702.
- (398) Micheroli R, Hebeisen M, Wildi LM, Exer P, Tamborrini G, Bernhard J et al. Impact of obesity on the response to tumor necrosis factor inhibitors in axial spondyloarthritis. *Arthritis Res Ther* 2017; 19(1):164.
- (399) Hwang J, Kim HM, Jeong H, Lee J, Ahn JK, Koh EM et al. Higher body mass index and anti-drug antibodies predict the discontinuation of anti-TNF agents in Korean patients with axial spondyloarthritis. *Rev Bras Reumatol Engl Ed* 2017; 57(4):311-319.
- (400) van Weely SF, Kneepkens EL, Nurmohamed MT, Dekker J, van der Horst-Bruinsma IE. Continuous Improvement of Physical Functioning in Ankylosing Spondylitis Patients by Tumor Necrosis Factor Inhibitors: Three-Year Followup and Predictors. *Arthritis Care Res (Hoboken )* 2016; 68(10):1522-1529.
- (401) Maas F, Spoorenberg A, Brouwer E, Bos R, Efde M, Chaudhry RN et al. Spinal radiographic progression in patients with ankylosing spondylitis treated with TNF-alpha blocking therapy: a prospective longitudinal observational cohort study. *PLoS One* 2015; 10(4):e0122693.

- (402) Gremese E, Bernardi S, Bonazza S, Nowik M, Peluso G, Massara A et al. Body weight, gender and response to TNF-alpha blockers in axial spondyloarthritis. *Rheumatology (Oxford)* 2014; 53(5):875-881.
- (403) Ottaviani S, Allanore Y, Tubach F, Forien M, Gardette A, Pasquet B et al. Body mass index influences the response to infliximab in ankylosing spondylitis. *Arthritis Res Ther* 2012; 14(3):R115.
- (404) Di Minno MN, Peluso R, Iervolino S, Russolillo A, Lupoli R, Scarpa R. Weight loss and achievement of minimal disease activity in patients with psoriatic arthritis starting treatment with tumour necrosis factor alpha blockers. *Ann Rheum Dis* 2014; 73(6):1157-1162.
- (405) Klingberg E, Bilberg A, Bjorkman S, Hedberg M, Jacobsson L, Forsblad-d'Elia H et al. Weight loss improves disease activity in patients with psoriatic arthritis and obesity: an interventional study. *Arthritis Res Ther* 2019; 21(1):17.
- (406) Polachek A, Li S, Chandran V, Gladman DD. Clinical Enthesitis in a Prospective Longitudinal Psoriatic Arthritis Cohort: Incidence, Prevalence, Characteristics, and Outcome. *Arthritis Care Res (Hoboken )* 2017; 69(11):1685-1691.
- (407) Hojgaard P, Grintborg B, Kristensen LE, Gudbjornsson B, Love TJ, Dreyer L. The influence of obesity on response to tumour necrosis factor-alpha inhibitors in psoriatic arthritis: results from the DANBIO and ICEBIO registries. *Rheumatology (Oxford)* 2016; 55(12):2191-2199.
- (408) Eder L, Thavaneswaran A, Chandran V, Cook RJ, Gladman DD. Obesity is associated with a lower probability of achieving sustained minimal disease activity state among patients with psoriatic arthritis. *Ann Rheum Dis* 2015; 74(5):813-817.
- (409) Mease PJ, Collier DH, Saunders KC, Li G, Kremer JM, Greenberg JD. Comparative effectiveness of biologic monotherapy versus combination therapy for patients with psoriatic arthritis: results from the Corrona registry. *RMD Open* 2015; 1(1):e000181.
- (410) Di Minno MN, Peluso R, Iervolino S, Lupoli R, Russolillo A, Scarpa R et al. Obesity and the prediction of minimal disease activity: a prospective study in psoriatic arthritis. *Arthritis Care Res (Hoboken )* 2013; 65(1):141-147.
- (411) Iannone F, Fanizzi R, Scioscia C, Anelli MG, Lapadula G. Body mass does not affect the remission of psoriatic arthritis patients on anti-TNF-alpha therapy. *Scand J Rheumatol* 2013; 42(1):41-44.
- (412) Haddad A, Thavaneswaran A, Toloza S, Chandran V, Gladman DD. Diffuse idiopathic skeletal hyperostosis in psoriatic arthritis. *J Rheumatol* 2013; 40(8):1367-1373.
- (413) Marini C, Formichi B, Bauleo C, Michelassi C, Airo E, Rossi G et al. Survival protection by bodyweight in isolated scleroderma-related pulmonary artery hypertension. *Intern Emerg Med* 2016; 11(7):941-952.
- (414) Assassi S, Del JD, Sutter K, McNearney TA, Reveille JD, Karnavas A et al. Clinical and genetic factors predictive of mortality in early systemic sclerosis. *Arthritis Rheum* 2009; 61(10):1403-1411.



- (415) Nielsen SM, Bartels EM, Henriksen M, Waehrens EE, Gudbergesen H, Bliddal H et al. Weight loss for overweight and obese individuals with gout: a systematic review of longitudinal studies. *Ann Rheum Dis* 2017; 76(11):1870-1882.
- (416) Dessein PH, Shipton EA, Stanwix AE, Joffe BI, Ramokgadi J. Beneficial effects of weight loss associated with moderate calorie/carbohydrate restriction, and increased proportional intake of protein and unsaturated fat on serum urate and lipoprotein levels in gout: a pilot study. *Ann Rheum Dis* 2000; 59(7):539-543.
- (417) Nguyen UD, Zhang Y, Louie-Gao Q, Niu J, Felson DT, LaValley MP et al. Obesity Paradox in Recurrent Attacks of Gout in Observational Studies: Clarification and Remedy. *Arthritis Care Res (Hoboken )* 2017; 69(4):561-566.
- (418) Romero-Talamas H, Daigle CR, Aminian A, Corcelles R, Brethauer SA, Schauer PR. The effect of bariatric surgery on gout: a comparative study. *Surg Obes Relat Dis* 2014; 10(6):1161-1165.
- (419) Su BY, Lai HM, Chen CJ, Chen YC, Chiu CK, Lin KM et al. Ischemia heart disease and greater waist circumference are risk factors of renal function deterioration in male gout patients. *Clin Rheumatol* 2008; 27(5):581-586.
- (420) Abhishek A, Valdes AM, Zhang W, Doherty M. Association of Serum Uric Acid and Disease Duration With Frequent Gout Attacks: A Case-Control Study. *Arthritis Care Res (Hoboken )* 2016; 68(10):1573-1577.
- (421) Alvarez-Nemegyei J, Cen-Piste JC, Medina-Escobedo M, Villanueva-Jorge S. Factors associated with musculoskeletal disability and chronic renal failure in clinically diagnosed primary gout. *J Rheumatol* 2005; 32(10):1923-1927.
